# Supplementary material for: Ligand-specific activation trajectories dictate GPCR signalling in cells
Source: Springer Nature journal article supplement (doi:10.1038/s41586-025-09963-3), 2026-01-14
Supplement: MOESM1 [file 41586_2025_9963_MOESM1_ESM.pdf › 41586_2025_9963_MOESM1_ESM.pdf]

---

## Supplementary information

---

# Ligand-specific activation trajectories dictate GPCR signalling in cells

---

In the format provided by the  
authors and unedited

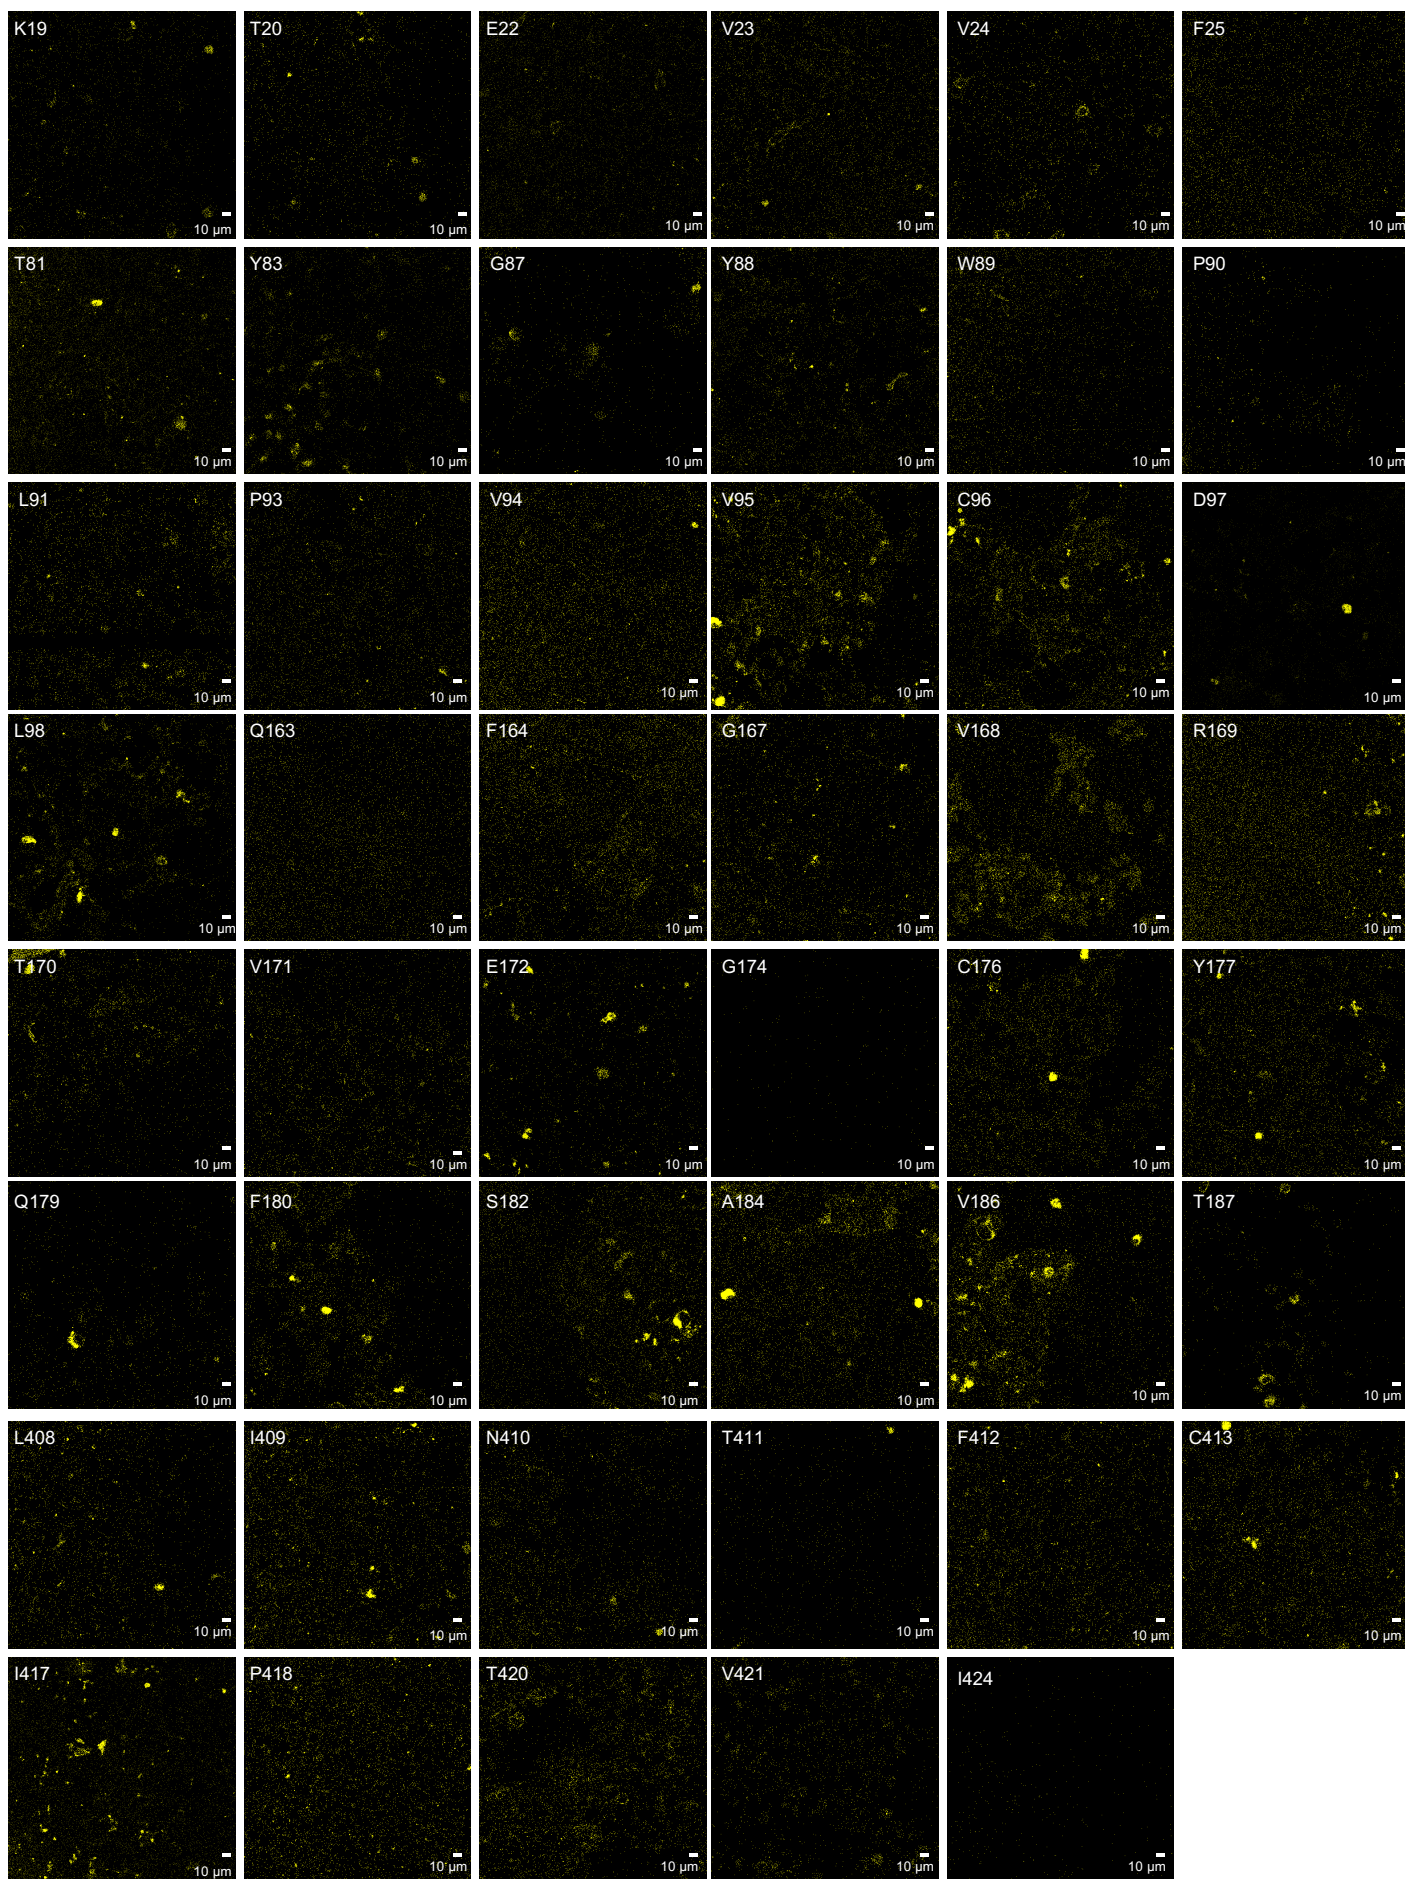

**Supplementary Figure 1: M<sub>2</sub>R mutants that could not be labelled.** Representative confocal images obtained from the labelling screen. The indicated M<sub>2</sub>R mutants (SP-M<sub>2</sub>R<sup>XXXTAG</sup>) could not be labelled with Tet-Cy3 at the ncAA TCO\*K incorporated at the indicated position (amino acid of the native human receptor). The data were obtained from at least 3 independent experiments.

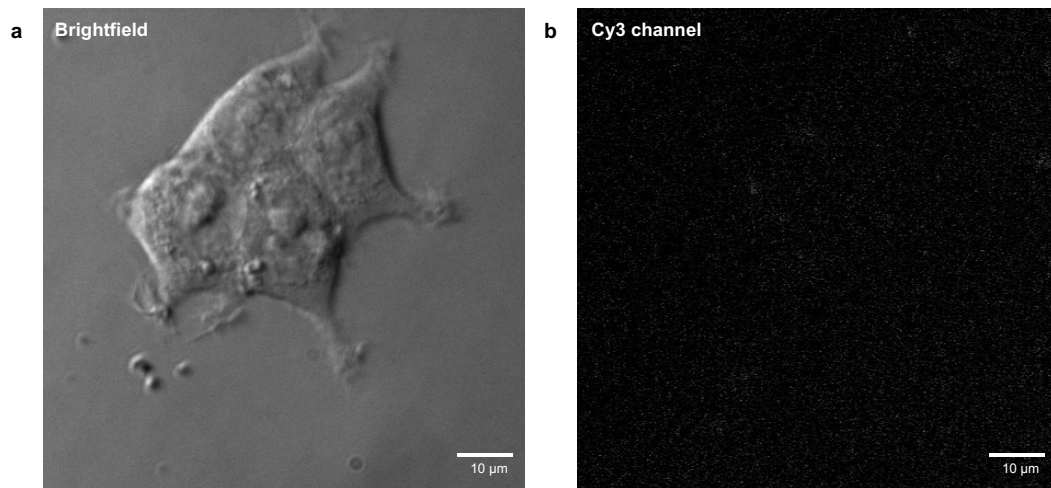

**Supplementary Figure 2: Labelling of the  $M_2R^{414}$  biosensor in absence of the non-canonical amino acid TCO\*K.** Shown are representative epifluorescence images of HEK293T cells transfected with the cDNA of the tRNA synthetase, the tRNA cassette (*MbPylRS<sup>AF</sup>/4xtRNA<sup>M15</sup>*), and *SP-M<sub>2</sub>R<sup>414TAG</sup>* in absence of the ncAA TCO\*K after labelling with Tet-Cy3. (a) brightfield, (b) Cy3 channel.

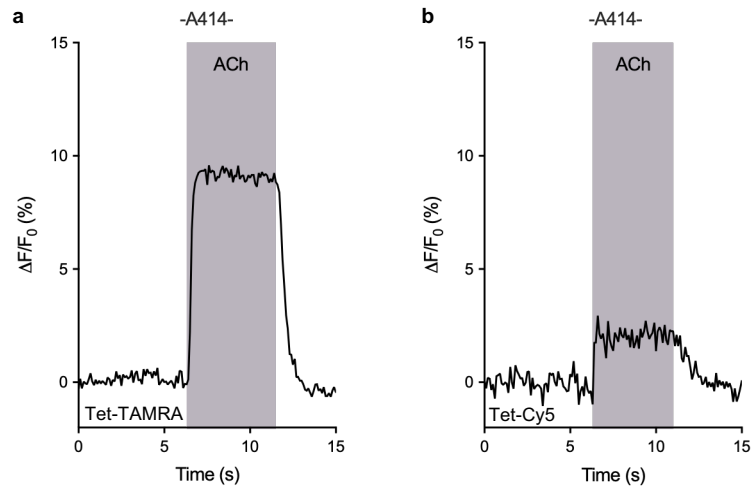

**Supplementary Figure 3: Conformational changes can be monitored with fluorescent dyes of different chemistry.** Representative traces of  $\Delta F/F_0$  of single cells expressing the  $M_2R$ -A414 biosensor ( $SP-M_2R^{A414TAG}$ ) and labelled with Tetrazine-TAMRA (a) or

Tetrazine-Cyanine5 (b) stimulated with 1 mM ACh. Shaded areas indicate the duration of agonist superfusion, unshaded areas represent buffer application. Data obtained from 3 independent experiments. Number of cells (n): n = 31 (a), n = 27 (b).

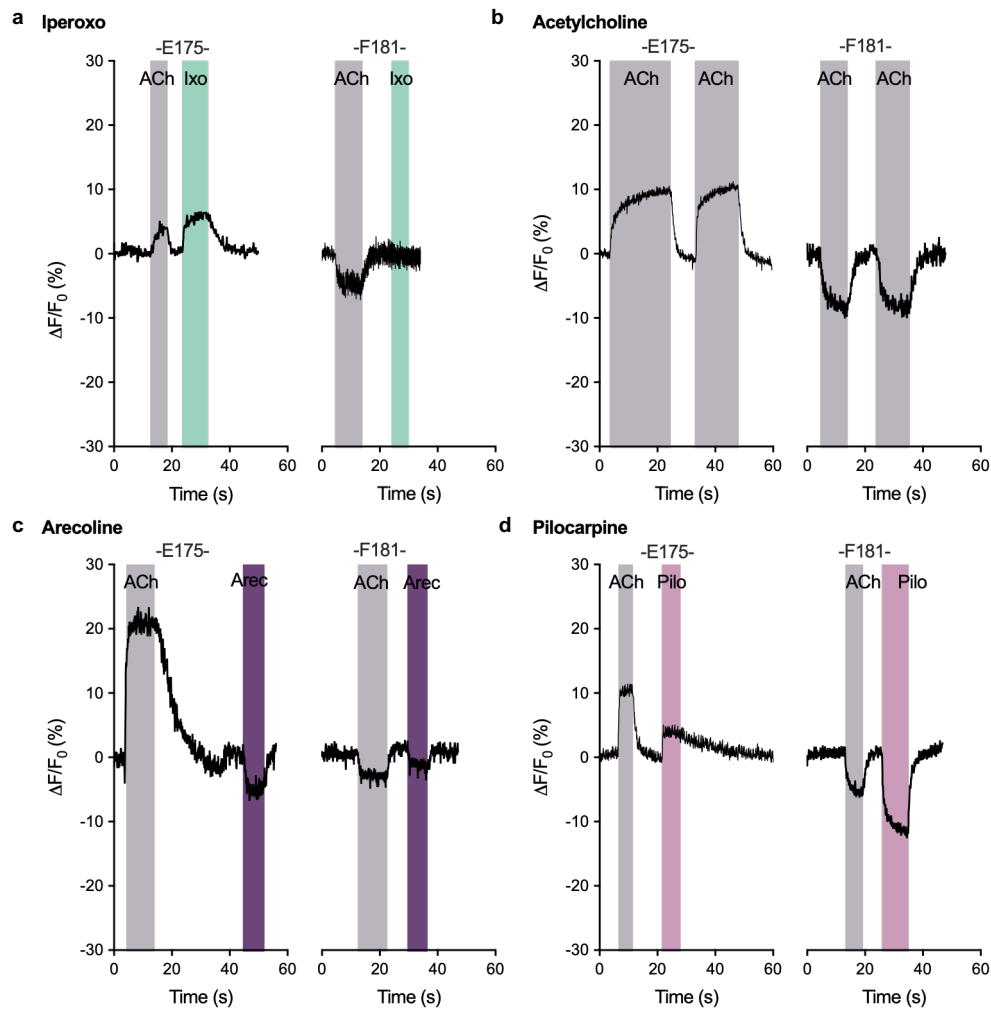

**Supplementary Figure 4: Agonist efficacies at biosensors are independent of the order of ligand addition.** Representative fluorescence intensity changes ( $\Delta F/F_0$ ) recorded in real-time from single HEK293T cells expressing indicated  $M_2R$  biosensors ( $SP-M_2R^{XXXTAG}$ ) superfused with 1mM ACh, followed by (a) 100  $\mu$ M iperoxo (Ixo), (b) 1mM ACh, (c) 1 mM arecoline (Arec), or (d) 10 mM pilocarpine (Pilo), after washout with buffer, respectively. Application of different agonists is indicated with shaded areas in different colors. Non-shaded areas indicate buffer application. Number of individual cells (n, for Ixo, ACh, Arec, Pilo): E175 (n = 29, 54, 15, 22); F181 (n = 20, 68, 22, 14). Number of independent experiments (for Ixo, ACh, Arec, Pilo): E175 = 5, 9, 3, 3; F181 = 3, 12, 3, 3.

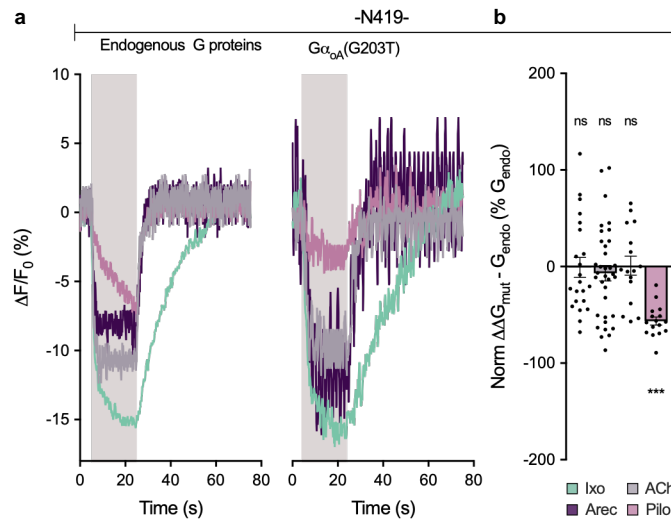

**Supplementary Figure 5: Conformational changes at M<sub>2</sub>R-N419 are independent of G-protein activity.** (a) Representative traces of  $\Delta F/F_0$  of single cells expressing the M<sub>2</sub>R-N419 biosensor (*SP-M<sub>2</sub>R<sup>N419TAG</sup>*) at endogenous G-protein levels (left) or after G $\alpha_{oA}$ (G203T) overexpression (center) and stimulated with 1 mM ACh (grey), 100  $\mu$ M Ixo (green), 1 mM Arec (purple), or 10 mM Pilo (pink). Shaded areas indicate the duration of agonist superfusion, unshaded areas represent buffer application. (b) Statistical summary of the normalised changes in  $\Delta F/F_0$  obtained from experiments in (a). Shown are the ligand-dependent differences in  $\Delta F/F_0$  after G $\alpha_{oA}$ (G203T) overexpression ( $G_{mut}$ ) normalised to endogenous G-protein levels ( $G_{endo}$ , set to 0%). Negative values indicate decreases in  $\Delta F/F_0$  after G $\alpha_{oA}$ (G203T) overexpression, and positive values indicate increases in  $\Delta F/F_0$  after G $\alpha_{oA}$ (G203T) overexpression. The bars represent means  $\pm$  sem, each data point represents a single cell. n, number of cells, number of independent experiments: n = 13, 3 (Ixo), n = 24, 4 (ACh), n = 13, 4 (Arec), n = 14, 3 (Pilo). \*\*\*p < 0.001 (0.0004), according to an unpaired two-tailed t-test.  $G_{endo}$ , endogenous G proteins; mut, mutant; ns, not significantly different.

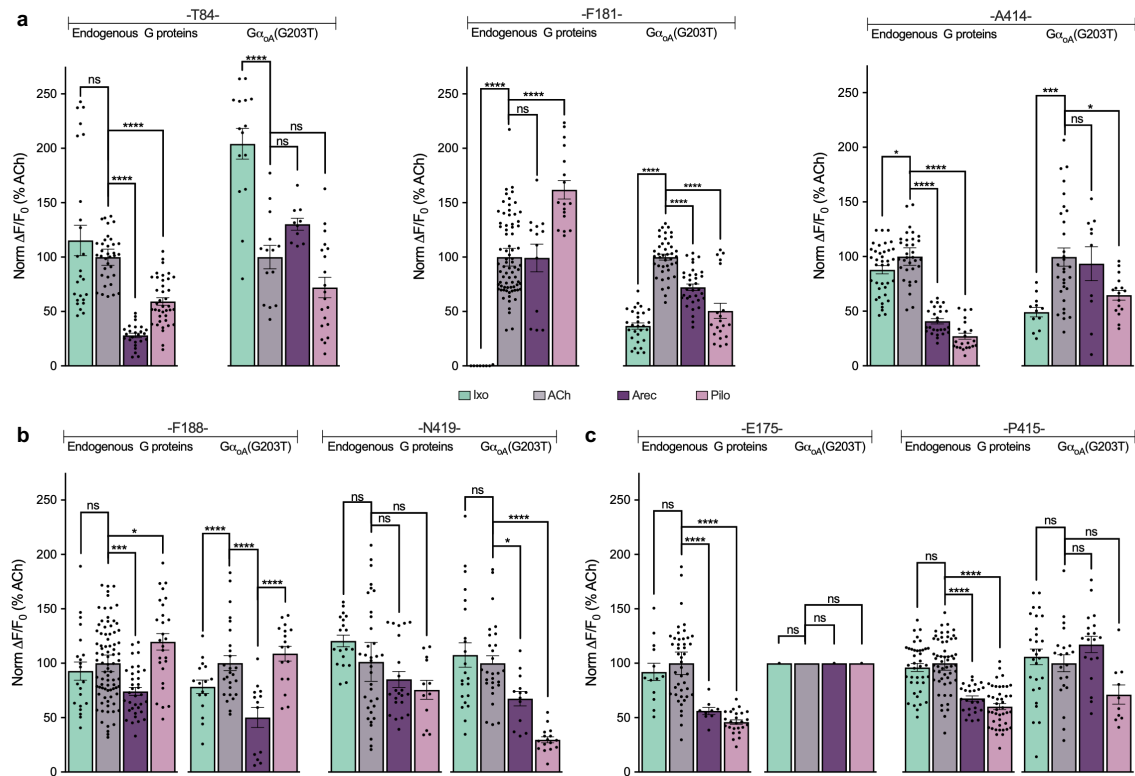

**Supplementary Figure 6:  $G\alpha_{0A}(G203T)$  overexpression changes the equilibrium of receptor/G-protein complexes.** Comparison of the ligand-dependent differences in  $\Delta F/F_0$  after  $G\alpha_{0A}(G203T)$  overexpression or at endogenous G-protein levels after activation of the indicated  $M_2R$  biosensors ( $SP-M_2R^{XXXXTAG}$ ) with the ligands 100  $\mu M$  Ixo (green), 1 mM ACh (grey), 1 mM Arec (purple), and 10 mM Pilo (pink). For each condition, the data has been normalised to the mean  $\Delta F/F_0$  of ACh (set to 100%). The bars represent means  $\pm$  sem of at least 3 independent experiments, each data point represents a single cell. Number of individual cells (n, for Ixo, ACh, Arec, Pilo): n = 15, 14, 10, 20 (T84), n = 11, 10, 9, 11 (E175), n = 29, 41, 34, 20 (F181), n = 16, 26, 13, 17 (F188), n = 12, 31, 10, 16 (A414), n = 28, 21, 19, 10 (P415), n = 13, 24, 13, 14 (N419). \*\*\*\*p < 0.0001, \*\*\*p < 0.001, \*\*p < 0.01, \*p < 0.05 according to an one-way analysis of variance (ANOVA multiple comparisons test) with Tukey's posthoc test. ns, not significantly different.



**Supplementary Table 1 (related to Figs. 1 and 2): Mean  $\Delta F/F_0$  [%] from M<sub>2</sub>R biosensors stimulated with distinct agonists.** N: total number of cells; Exp.: independent days of transfections; SEM: standard error of the mean.

| T84 <sup>TM2</sup> |       |      |    |      | E175 <sup>ECL2</sup> |      |    |      | F181 <sup>ECL2</sup> |      |    |      |
|--------------------|-------|------|----|------|----------------------|------|----|------|----------------------|------|----|------|
| Agonist            | Mean  | SEM  | N  | Exp. | Mean                 | SEM  | N  | Exp. | Mean                 | SEM  | N  | Exp. |
| Ixo                | 9.36  | 1.20 | 21 | 7    | 9.61                 | 0.83 | 13 | 7    | 0.00                 | 0.01 | 12 | 5    |
| ACh                | 8.46  | 0.31 | 35 | 17   | 10.43                | 0.54 | 44 | 11   | -5.86                | 0.24 | 76 | 9    |
| Arec               | -2.38 | 0.18 | 25 | 6    | -5.86                | 0.35 | 9  | 4    | -5.82                | 0.75 | 13 | 7    |
| Pilo               | 5.02  | 0.29 | 39 | 7    | 4.80                 | 0.22 | 25 | 5    | -9.50                | 0.50 | 17 | 7    |

  

| F188 <sup>TM5</sup> |        |      |    |      | A414 <sup>ECL3</sup> |      |    |      | P415 <sup>ECL3</sup> |      |    |      |
|---------------------|--------|------|----|------|----------------------|------|----|------|----------------------|------|----|------|
| Agonist             | Mean   | SEM  | N  | Exp. | Mean                 | SEM  | N  | Exp. | Mean                 | SEM  | N  | Exp. |
| Ixo                 | -8.42  | 0.75 | 21 | 5    | -14.4                | 0.61 | 38 | 12   | -15.52               | 0.58 | 40 | 9    |
| ACh                 | -11.10 | 0.52 | 96 | 15   | -16.36               | 0.64 | 33 | 7    | -16.15               | 0.52 | 56 | 9    |
| Arec                | -6.72  | 0.34 | 35 | 6    | -6.68                | 0.38 | 26 | 11   | -10.92               | 0.39 | 26 | 5    |
| Pilo                | -10.86 | 0.68 | 27 | 6    | -4.44                | 0.46 | 22 | 3    | -9.71                | 0.46 | 43 | 10   |

  

| N419 <sup>TM7</sup> |        |      |    |      |
|---------------------|--------|------|----|------|
| Agonist             | Mean   | SEM  | N  | Exp. |
| Ixo                 | -13.76 | 0.61 | 19 | 9    |
| ACh                 | -11.66 | 1.02 | 34 | 12   |
| Arec                | -9.72  | 0.83 | 22 | 6    |
| Pilo                | -8.63  | 0.99 | 12 | 6    |

**Supplementary Table 2 (related to Fig. 2 and Extended Data Fig. 5: Potency (pEC<sub>50</sub>) and maximum efficacy (E<sub>max</sub>) determined by G<sub>oA</sub> TRUPATH assays of wildtype M<sub>2</sub>R or M<sub>2</sub>R biosensors stimulated with the indicated agonists.** Each condition was performed as 3-4 independent experiments. E<sub>max</sub> indicates the BRET response normalised to the maximum BRET response of ACh (% of ACh) for the respective conditions of receptor and ligand. SEM: standard error of the mean.

| Wildtype M <sub>2</sub> R |                   |                  |                   |                  |                   |                  |                   |                  |
|---------------------------|-------------------|------------------|-------------------|------------------|-------------------|------------------|-------------------|------------------|
| Agonist                   | Ixo               |                  | ACh               |                  | Arec              |                  | Pilo              |                  |
|                           | pEC <sub>50</sub> | E <sub>max</sub> | pEC <sub>50</sub> | E <sub>max</sub> | pEC <sub>50</sub> | E <sub>max</sub> | pEC <sub>50</sub> | E <sub>max</sub> |
| Mean                      | 10.36             | 100.70           | 7.93              | 100.40           | 6.66              | 116.10           | 2.10              | 85.49            |
| SEM                       | 0.06              | 0.58             | 0.11              | 0.61             | 0.12              | 3.64             | 0.18              | 0.86             |
| T84 <sup>TM2</sup>        |                   |                  |                   |                  |                   |                  |                   |                  |
| Agonist                   | Ixo               |                  | ACh               |                  | Arec              |                  | Pilo              |                  |
|                           | pEC <sub>50</sub> | E <sub>max</sub> | pEC <sub>50</sub> | E <sub>max</sub> | pEC <sub>50</sub> | E <sub>max</sub> | pEC <sub>50</sub> | E <sub>max</sub> |
| Mean                      | 10.21             | 106.30           | 8.11              | 102.00           | 6.67              | 114.00           | 6.61              | 71.00            |
| SEM                       | 0.15              | 1.09             | 0.15              | 0.47             | 0.12              | 1.28             | 0.19              | 1.48             |
| E175 <sup>ECL2</sup>      |                   |                  |                   |                  |                   |                  |                   |                  |
| Agonist                   | Ixo               |                  | ACh               |                  | Arec              |                  | Pilo              |                  |
|                           | pEC <sub>50</sub> | E <sub>max</sub> | pEC <sub>50</sub> | E <sub>max</sub> | pEC <sub>50</sub> | E <sub>max</sub> | pEC <sub>50</sub> | E <sub>max</sub> |
| Mean                      | 10.32             | 108.40           | 8.25              | 101.3            | 7.02              | 120.2            | 6.28              | 82.48            |
| SEM                       | 0.17              | 0.90             | 0.14              | 1.54             | 0.14              | 1.49             | 0.22              | 2.03             |
| F181 <sup>ECL2</sup>      |                   |                  |                   |                  |                   |                  |                   |                  |
| Agonist                   | Ixo               |                  | ACh               |                  | Arec              |                  | Pilo              |                  |
|                           | pEC <sub>50</sub> | E <sub>max</sub> | pEC <sub>50</sub> | E <sub>max</sub> | pEC <sub>50</sub> | E <sub>max</sub> | pEC <sub>50</sub> | E <sub>max</sub> |
| Mean                      | 8.36              | 102.40           | 5.81              | 101.60           | 5.10              | 49.97            | 4.97              | 27.92            |
| SEM                       | 0.10              | 0.74             | 0.08              | 0.70             | 0.12              | 1.09             | 0.01              | 0.58             |
| F188 <sup>TM5</sup>       |                   |                  |                   |                  |                   |                  |                   |                  |
| Agonist                   | Ixo               |                  | ACh               |                  | Arec              |                  | Pilo              |                  |
|                           | pEC <sub>50</sub> | E <sub>max</sub> | pEC <sub>50</sub> | E <sub>max</sub> | pEC <sub>50</sub> | E <sub>max</sub> | pEC <sub>50</sub> | E <sub>max</sub> |
| Mean                      | 9.58              | 105.80           | 7.02              | 103.80           | 6.06              | 106.00           | 5.60              | 61.62            |
| SEM                       | 0.03              | 1.47             | 0.02              | 1.63             | 0.02              | 2.00             | 0.08              | 1.82             |
| A414 <sup>ECL3</sup>      |                   |                  |                   |                  |                   |                  |                   |                  |
| Agonist                   | Ixo               |                  | ACh               |                  | Arec              |                  | Pilo              |                  |
|                           | pEC <sub>50</sub> | E <sub>max</sub> | pEC <sub>50</sub> | E <sub>max</sub> | pEC <sub>50</sub> | E <sub>max</sub> | pEC <sub>50</sub> | E <sub>max</sub> |
| Mean                      | 10.81             | 106.00           | 8.60              | 99.90            | 7.90              | 113.80           | 6.57              | 83.52            |
| SEM                       | 0.09              | 1.14             | 0.06              | 1.16             | 0.09              | 1.25             | 0.05              | 1.93             |
| P415 <sup>ECL3</sup>      |                   |                  |                   |                  |                   |                  |                   |                  |
| Agonist                   | Ixo               |                  | ACh               |                  | Arec              |                  | Pilo              |                  |
|                           | pEC <sub>50</sub> | E <sub>max</sub> | pEC <sub>50</sub> | E <sub>max</sub> | pEC <sub>50</sub> | E <sub>max</sub> | pEC <sub>50</sub> | E <sub>max</sub> |
| Mean                      | 10.47             | 105.40           | 8.24              | 101.30           | 7.39              | 115.00           | 6.75              | 82.43            |
| SEM                       | 0.04              | 1.05             | 0.05              | 1.06             | 0.25              | 1.73             | 0.28              | 1.33             |
| N419 <sup>TM7</sup>       |                   |                  |                   |                  |                   |                  |                   |                  |
| Agonist                   | Ixo               |                  | ACh               |                  | Arec              |                  | Pilo              |                  |
|                           | pEC <sub>50</sub> | E <sub>max</sub> | pEC <sub>50</sub> | E <sub>max</sub> | pEC <sub>50</sub> | E <sub>max</sub> | pEC <sub>50</sub> | E <sub>max</sub> |
| Mean                      | 9.40              | 107.70           | 7.27              | 102.10           | 6.25              | 92.16            | 6.10              | 47.79            |
| SEM                       | 0.15              | 1.26             | 0.10              | 0.94             | 0.04              | 1.33             | 0.09              | 1.51             |

**Supplementary Table 3 (related to Fig. 4 and Extended Data Fig. 9): Mean Tau-ON (apparent on-rates, s) values of fluorescence intensity changes from M<sub>2</sub>R biosensors stimulated with the indicated agonists. N: total number of cells. Exp: days of independent transfections, SEM: standard error of mean, G<sub>endo</sub>: endogenous G-protein level, G $\alpha$ <sub>oA</sub>: overexpressed G $\alpha$ <sub>oA</sub>(G203T) mutant.**

| Agonist | T84 <sup>TM2</sup> |                          |                   |                          |                   |                          |                   |                          | E175 <sup>ECL2</sup> |                          |                   |                          |                   |                          |                   |                          |
|---------|--------------------|--------------------------|-------------------|--------------------------|-------------------|--------------------------|-------------------|--------------------------|----------------------|--------------------------|-------------------|--------------------------|-------------------|--------------------------|-------------------|--------------------------|
|         | Ixo                |                          | ACh               |                          | Arec              |                          | Pilo              |                          | Ixo                  |                          | ACh               |                          | Arec              |                          | Pilo              |                          |
|         | G <sub>endo</sub>  | G $\alpha$ <sub>oA</sub> | G <sub>endo</sub> | G $\alpha$ <sub>oA</sub> | G <sub>endo</sub> | G $\alpha$ <sub>oA</sub> | G <sub>endo</sub> | G $\alpha$ <sub>oA</sub> | G <sub>endo</sub>    | G $\alpha$ <sub>oA</sub> | G <sub>endo</sub> | G $\alpha$ <sub>oA</sub> | G <sub>endo</sub> | G $\alpha$ <sub>oA</sub> | G <sub>endo</sub> | G $\alpha$ <sub>oA</sub> |
| Mean    | 1.12               | 1.06                     | 0.25              | 0.64                     | 0.34              | 2.72                     | 2.10              | 1.14                     | 1.03                 | NA                       | 0.50              | NA                       | 0.27              | NA                       | 0.18              | NA                       |
| SEM     | 0.11               | 0.09                     | 0.02              | 0.15                     | 0.06              | 0.60                     | 0.18              | 0.16                     | 0.14                 | NA                       | 0.02              | NA                       | 0.03              | NA                       | 0.01              | NA                       |
| N       | 25                 | 15                       | 35                | 14                       | 25                | 10                       | 39                | 20                       | 13                   | 11                       | 44                | 10                       | 9                 | 9                        | 25                | 11                       |
| Exp     | 7                  | 5                        | 17                | 7                        | 6                 | 3                        | 7                 | 4                        | 7                    | 3                        | 11                | 3                        | 4                 | 3                        | 5                 | 3                        |

  

| Agonist | F181 <sup>ECL2</sup> |                          |                   |                          |                   |                          |                   |                          | F188 <sup>TM5</sup> |                          |                   |                          |                   |                          |                   |                          |
|---------|----------------------|--------------------------|-------------------|--------------------------|-------------------|--------------------------|-------------------|--------------------------|---------------------|--------------------------|-------------------|--------------------------|-------------------|--------------------------|-------------------|--------------------------|
|         | Ixo                  |                          | ACh               |                          | Arec              |                          | Pilo              |                          | Ixo                 |                          | ACh               |                          | Arec              |                          | Pilo              |                          |
|         | G <sub>endo</sub>    | G $\alpha$ <sub>oA</sub> | G <sub>endo</sub> | G $\alpha$ <sub>oA</sub> | G <sub>endo</sub> | G $\alpha$ <sub>oA</sub> | G <sub>endo</sub> | G $\alpha$ <sub>oA</sub> | G <sub>endo</sub>   | G $\alpha$ <sub>oA</sub> | G <sub>endo</sub> | G $\alpha$ <sub>oA</sub> | G <sub>endo</sub> | G $\alpha$ <sub>oA</sub> | G <sub>endo</sub> | G $\alpha$ <sub>oA</sub> |
| Mean    | NA                   | 18.41                    | 1.33              | 1.82                     | 1.85              | 1.96                     | 1.87              | 1.50                     | 3.21                | 9.35                     | 2.69              | 3.20                     | 2.21              | 4.64                     | 4.73              | 8.09                     |
| SEM     | NA                   | 1.48                     | 0.04              | 0.04                     | 0.16              | 0.13                     | 0.10              | 0.32                     | 0.26                | 0.45                     | 0.11              | 0.12                     | 0.14              | 0.45                     | 0.34              | 0.54                     |
| N       | 12                   | 29                       | 76                | 41                       | 13                | 34                       | 17                | 20                       | 21                  | 16                       | 96                | 26                       | 35                | 13                       | 27                | 17                       |
| Exp     | 5                    | 4                        | 9                 | 7                        | 7                 | 4                        | 7                 | 3                        | 5                   | 3                        | 15                | 4                        | 6                 | 3                        | 6                 | 3                        |

  

| Agonist | A414 <sup>ECL3</sup> |                          |                   |                          |                   |                          |                   |                          | P415 <sup>ECL3</sup> |                          |                   |                          |                   |                          |                   |                          |
|---------|----------------------|--------------------------|-------------------|--------------------------|-------------------|--------------------------|-------------------|--------------------------|----------------------|--------------------------|-------------------|--------------------------|-------------------|--------------------------|-------------------|--------------------------|
|         | Ixo                  |                          | ACh               |                          | Arec              |                          | Pilo              |                          | Ixo                  |                          | ACh               |                          | Arec              |                          | Pilo              |                          |
|         | G <sub>endo</sub>    | G $\alpha$ <sub>oA</sub> | G <sub>endo</sub> | G $\alpha$ <sub>oA</sub> | G <sub>endo</sub> | G $\alpha$ <sub>oA</sub> | G <sub>endo</sub> | G $\alpha$ <sub>oA</sub> | G <sub>endo</sub>    | G $\alpha$ <sub>oA</sub> | G <sub>endo</sub> | G $\alpha$ <sub>oA</sub> | G <sub>endo</sub> | G $\alpha$ <sub>oA</sub> | G <sub>endo</sub> | G $\alpha$ <sub>oA</sub> |
| Mean    | 0.53                 | 2.21                     | 0.17              | 0.49                     | 0.87              | 0.54                     | 0.33              | 0.68                     | 0.34                 | 0.44                     | 0.16              | 0.59                     | 0.22              | 0.68                     | 0.21              | 0.28                     |
| SEM     | 0.03                 | 0.34                     | 0.01              | 0.08                     | 0.12              | 0.08                     | 0.02              | 0.10                     | 0.03                 | 0.03                     | 0.00              | 0.08                     | 0.01              | 0.17                     | 0.01              | 0.06                     |
| N       | 38                   | 12                       | 33                | 31                       | 26                | 10                       | 22                | 16                       | 40                   | 28                       | 56                | 21                       | 26                | 19                       | 43                | 10                       |
| Exp     | 12                   | 4                        | 7                 | 9                        | 11                | 3                        | 3                 | 3                        | 9                    | 5                        | 9                 | 6                        | 5                 | 5                        | 10                | 3                        |

**Supplementary Table 4: Mean pEC<sub>50</sub> values of the concentration-effect-curves shown in Extended Data Fig. 10.** N: total number of experiments; SEM: standard error of the mean.

| G $\alpha$ protein | Acetylcholine |      |   | Iperoxo |      |   | Arecoline |      |   | Pilocarpine |      |   |
|--------------------|---------------|------|---|---------|------|---|-----------|------|---|-------------|------|---|
|                    | Mean          | SEM  | N | Mean    | SEM  | N | Mean      | SEM  | N | Mean        | SEM  | N |
| G <sub>i1</sub>    | 7.27          | 0.15 | 4 | 9.30    | 0.10 | 6 | 6.00      | 0.11 | 4 | 5.18        | 0.13 | 6 |
| G <sub>i2</sub>    | 7.41          | 0.14 | 4 | 9.75    | 0.14 | 7 | 6.18      | 0.07 | 4 | 5.63        | 0.10 | 6 |
| G <sub>i3</sub>    | 6.55          | 0.16 | 4 | 8.74    | 0.10 | 6 | 5.68      | 0.10 | 4 | 5.36        | 0.22 | 5 |
| G <sub>oA</sub>    | 7.39          | 0.10 | 6 | 9.65    | 0.05 | 5 | 6.54      | 0.07 | 3 | 5.50        | 0.06 | 6 |
| G <sub>oB</sub>    | 7.76          | 0.12 | 5 | 9.83    | 0.10 | 8 | 6.66      | 0.12 | 3 | 5.82        | 0.10 | 5 |
| G <sub>z</sub>     | 6.56          | 0.15 | 5 | 8.90    | 0.15 | 6 | 5.85      | 0.09 | 4 | 4.77        | 0.28 | 4 |
| G <sub>15</sub>    | 6.77          | 0.23 | 6 | 9.50    | 0.10 | 6 | 5.68      | 0.21 | 4 | 5.44        | 0.29 | 5 |

**Supplementary Table 5 (related to Methods): Primer sequences for Gibson assembly.** Primer sequences are depicted as 5'-3' reading frame. The priming region is highlighted in capital letters.

| #  | Sequence (5'-3')                                                                           |
|----|--------------------------------------------------------------------------------------------|
| 1  | ATTCTAGTTGTGGTTTGTCCAAACTCATCAA                                                            |
| 2  | ggagtttgttgagttattGCTGCCGGCGAACACCAGGCAGAAGATGTAGCTCAGGGCGATGATCGTCTTCATCAGTGTGATGGATATCTG |
| 3  | TTGATGAGTTTGGACAAACCACAAC TAGAAT                                                           |
| 4  | ataggcgctacaaggTAAGCGGCCGCTCGAGCAT                                                         |
| 5  | CAGATATCCATCACACTGATGAAGACGATCATCGCCCTGAGCTACATCTTCTGCCTGGTGTTCGCCGGCAGCaataactcaacaaactcc |
| 6  | ATGCTCGAGCGGCCGCTTAacctgtagcgctat                                                          |
| 7  | ctcctcgcccttgctcacgcctccgccaccGGTCCTTGTAGCGCCTAT                                           |
| 8  | atggacgagctgtacaagtaaTGAGCGGCCGCTCGA                                                       |
| 9  | aggaccgglggcggaggcGTGAGCAAGGGCGAGGAG                                                       |
| 10 | tcgagcgccgctcattaCTTGTACAGCTCGTCCAT                                                        |
| 11 | TTCTGCCTGGTGTTCGCCTACCCATACGATGTTCCAGATTACGCTGGCAGCaataactcaaca                            |
| 12 | tgttgagttattGCTGCCAGCGTAATCTGGAACATCGTATGGGTAGGCCGAACACCAGGCAGAA                           |
| 13 | GACAATTGGTgctTGGCTTTGTTACATC                                                               |
| 14 | CACACAGTGTGGGG                                                                             |

**Supplementary Table 6: Primers for site-directed mutagenesis (related to Methods).** The respective M<sub>2</sub>R residue was exchanged by an amber stop codon (TAG) using the listed forward and reverse primers. Primer sequences are depicted in the 5'-3' reading frame. The TAG is highlighted in capital letters.

| M <sub>2</sub> R residue | Forward (5'-3')                  | Reverse (5'-3')                        |
|--------------------------|----------------------------------|----------------------------------------|
| K19                      | TAGacatttgaagtgggtttattgtcctggg  | cttcaaatgtCTAataaggactgtgaagaccag      |
| T20                      | gTAGttgaagtgggtttattgtcctgggg    | cactcaaaCTActataaggactgtgaagaccag      |
| F21                      | gacaTAGgaagtgggtttattgtcctggg    | ccacttcCTAtgtctataaggactgtgaagac       |
| E22                      | TAGgtgggtttattgtcctgggtggctgg    | taaaccaccacCTAaaatgtctataaggactgtgaag  |
| V23                      | gaaTAGgtgtttattgtcctgggtggctgg   | taaacacCTAttcaaatgtctataaggactgtgaag   |
| V24                      | gTAGttattgtcctgggtggctggatcc     | ggacaataaaCTAcacttcaaatgtctataaggacttg |
| F25                      | gtgggtgTAGattgtcctgggtggctgg     | gacaatCTAcaccacttcaaatgtctataaggacttg  |
| T81                      | gttacTAGctctacactgtgattgggtactgg | gtagagCTAgtaacaagttcatggagaaaacacc     |
| L82                      | gttacaccTAGtacactgtgattgggtactgg | gtaCTAggtgtacaagttcatggagaaaacacc      |
| Y93                      | gtacaccctcTAGactgtgattgggtactg   | CTAgaggggtgtacaagttcatggagaaaacac      |
| T84                      | cTAGgtgattgggtactggccttggggac    | aaccaatcacCTAgtagaggggtgtacaagttc      |
| V85                      | ctTAGattgggtactggccttggggacc     | gtaaccaatCTAagtgtagaggggtgtacaag       |
| I86                      | gtgTAGgggtactggccttggggacc       | ccagtaaccCTAcacagtgtagaggggtg          |
| G87                      | TAGtactggccttggggacactgtggg      | aaggccagtaCTAaatcacagtgtagaggggtg      |
| Y88                      | ggTAgTggccttggggacactgtgg        | aaaggccaCTAaccaatcacagtgtagagg         |
| W89                      | cTAGccttggggacactgtggtgtg        | gtcccaaaggCTAgtaaccaatcacagtg          |
| P90                      | ctggTAGttggggacactgtggtgtg       | ggtcccaaCTAccagtaaccaatcacagtg         |
| L91                      | ggcctTAGgggacactgtggtgtg         | ggtccCTAaggccagtaaccaatcac             |
| G92                      | ggccttgTAGcctgtggtgtgtgac        | ggCTAaaaggccagtaaccaatcacagtg          |
| P93                      | ggaTAGgtggtgtgtgaccttggctag      | acaccacCTAtcccaaaggccagtaacc           |
| V94                      | gggacctTAGgtgtgtgaccttgg         | cacacCTAaggtcccaaaggccag               |
| V95                      | gTAGgtgaccttggctagccctg          | aagggtcacaCTAcacaggtcccaaagg           |
| C96                      | ggtgTAGgaccttggctagccctg         | aagggtcCTAcaccacaggtcccaaagg           |
| D97                      | ggtgtgtTAGccttggctagccctg        | caaagCTAacacaccacaggtcccaaagg          |
| L98                      | gtgtgacTAGtggttagccctggac        | gccacCTAgtcacacaccacaggtcc             |
| F161                     | ctcTAGtggcagttcattgtaggggtgag    | gaactgccacCTAgagaatggctggagc           |
| W162                     | ctcttcTAGcagttcattgtaggggtgag    | gaactgCTAgaagagaatggctggagc            |
| Q163                     | ctctctggTAGttcattgtaggggtgag     | gaaCTAccagaagagaatggctggagc            |
| F164                     | ctctctggcagTAGattgtaggggtgag     | Actgccagaagagaatggctggagc              |
| I165                     | cTAGgtaggggtgagaactgtggagg       | cacccctacCTAgaactgccagaagag            |
| V166                     | TAGgggggtgagaactgtggaggatgg      | gttctcaccctCTAaatgaactgccagaag         |
| G167                     | TAGgtgagaactgtggaggatggggag      | cacagttctacCTAtacaatgaactgccag         |
| V168                     | gTAGagaactgtggaggatggggag        | ccacagttctCTAccctacaatgaactgc          |
| R169                     | ggtgTAGactgtggaggatggggag        | ccacagtCTAcaccctacaatgaactgc           |
| T170                     | ggtgagaTAGgtggaggatggggag        | ccacCTAtctcaccctacaatgaactgc           |
| V171                     | gagaactTAGgaggatggggagtg         | cctcCTAagttctcaccctacaatgaac           |
| E172                     | gaactgtgTAGgatggggagtgctac       | catcCTAcacagttctcaccctacaatg           |
| D173                     | ctgtggagTAGggggagtgctacattc      | ccCTActccacagttctcaccctac              |
| G174                     | ctgtggaggatTAGgagtgctacattcag    | CTAatcctccacagttctcaccctac             |
| E175                     | ggatgggTAGtgctacattcagtttttcc    | gcaCTAccatcctccacagttctc               |
| C176                     | ggaggatggggagTAGtacattcagtttttcc | ctcccatcctccacagttctc                  |
| Y177                     | ggatggggagtgTAGattcagtttttcc     | gcactcccatcctccacagttc                 |
| I178                     | tggggagtgctacTAGcagttttttccaatg  | gtagcactcccatcctccacag                 |

**Supplementary Table 6: Site-directed mutagenesis primers. - Continues**

| # M <sub>2</sub> R residue | Forward (5'-3')                  | Reverse (5'-3')                     |
|----------------------------|----------------------------------|-------------------------------------|
| Q179                       | ggggagtgctacattTAGtttttccaatgc   | tgtagcactcccatcctccacag             |
| F180                       | cattcagTAGttttccaatgctgctgcacc   | aaaCTActgaatgtagcactcccatcctcc      |
| F181                       | TAGtccaatgctgctgcaccttggtagc     | cagcattggaCTAaaactgaatgtagcactcc    |
| S182                       | gtttttTAGaatgctgctgcaccttggtagc  | cattCTAaaaaaactgaatgtagcactcccatcc  |
| N183                       | ccTAGgctgctgcaccttggtagc         | gacagcagcCTAggaaaaaactgaatgtagc     |
| A184                       | TAGgctgctgcaccttggtagcgctattgc   | aggtgacagcCTAattggaaaaaactgaatgtagc |
| A185                       | gctTAGGtcaccttggtagcgctattgc     | aggtgacCTAagcattggaaaaaactgaatgtagc |
| V186                       | gctgctTAGaccttggtagcgctattgc     | aggtCTAagcagcattggaaaaaactgaatgtagc |
| T187                       | gctgctgcTAGtttggtagcgctattgc     | aCTAgacagcagcattggaaaaaactgaatgtagc |
| F188                       | gctgtcaccTAGggtacggctattgc       | cCTAggtgacagcagcattggaaaaaactg      |
| G189                       | gctgtcacctttTAGacggctattgcagc    | Aaaaggtgacagcagcattggaaaaaactgaatg  |
| V407                       | gtcatgTAGctcattaacacctttgtgcac   | ttagCTAcatgacattglatggggcccaag      |
| L498                       | gtcatgggtgTAGattaacacctttgtgcacc | tCTAcaccatgacattgtatggggcccaag      |
| I409                       | catgggtgcTAGaacacctttgtgcacc     | CTAgagcaccatgacattgtatggggcccaag    |
| N410                       | TAGacctttgtgcaccttgcaccccaac     | gcacaaaaggtCTAaatgagcaccatgacattg   |
| T411                       | cTAGttttgtgcaccttgcaccccaac      | ggtgcacaaaaCTAgttaatgagcaccatgac    |
| F412                       | ccTAGtgtgcaccttgcaccccaac        | ggtgcacaCTAggtttaatgagcaccatg       |
| C413                       | TAGgcaccttgcaccccaacactgtg       | tgcaaggtgcCTAaaaggtttaatgagcac      |
| A414                       | TAGccttgcaccccaacactgtgtg        | ggatgcaaggCTAacaaaaggtttaatgagc     |
| P415                       | gcaTAGtgcatcccaacactgtgtg        | ggatgcaCTAtgcacaaaaggtttaatgagc     |
| C416                       | gcacctTAGatcccaacactgtgtg        | ggggatCTAaggtgcacaaaaggtttaatg      |
| I417                       | gcaccttgcTAGcccaacactgtgtg       | gggCTAgcaaggtgcacaaaaggtttaatg      |
| P418                       | gcaccttgcTAGaacactgtgtggac       | Agatgcaaggtgcacaaaaggtttaatgag      |
| N419                       | gcaccccTAGactgtgtggacaattgg      | gtCTAggggatgcaaggtgcacaaaagg        |
| T420                       | gcaccccaacTAGgtgtggacaattgg      | TAgttgggatgcaaggtgcacaaaagg         |
| V421                       | ccccaacactTAGtggaactgtgtactg     | CTAagtgttgggatgcaaggtgcac           |
| W422                       | ccccaacactgtgTAGacaattgtgtactg   | cacagtgttgggatgcaaggtgc             |
| T423                       | aacactgtgtgTAGattgttactgtgtt     | Accacacagtgttgggatgcaagg            |
| I424                       | cactgtgtggacaTAGggttactgtgtt     | tgtccacacagtgttgggatgcaag           |

**Supplementary Table 7: G-protein subunits for TRUPATH G-protein activation assays. (related to Methods).** G $\beta$  and G $\gamma$  subunits used for the respective G $\alpha$  subunit. The combination of subunits has been previously optimized for each G $\alpha$  by Olsen et al<sup>54</sup>.

| G $\alpha$ | G $\gamma$  | G $\beta$ |
|------------|-------------|-----------|
| i1         | $\gamma$ 9  | $\beta$ 3 |
| i2         | $\gamma$ 8  | $\beta$ 3 |
| i3         | $\gamma$ 9  | $\beta$ 3 |
| oA         | $\gamma$ 8  | $\beta$ 3 |
| oB         | $\gamma$ 8  | $\beta$ 3 |
| Z          | $\gamma$ 1  | $\beta$ 3 |
| Gust       | $\gamma$ 1  | $\beta$ 3 |
| sS         | $\gamma$ 9  | $\beta$ 3 |
| sL         | $\gamma$ 1  | $\beta$ 1 |
| 11         | $\gamma$ 13 | $\beta$ 3 |
| 12         | $\gamma$ 9  | $\beta$ 3 |
| 13         | $\gamma$ 9  | $\beta$ 3 |
| 15         | $\gamma$ 13 | $\beta$ 3 |
