# Supplementary material for: Ligand-specific activation trajectories dictate GPCR signalling in cells
Source: Nature. 2026 Jan 14;650(8103):1053–62. doi: 10.1038/s41586-025-09963-3 (PMC12935549; doi:10.1038/s41586-025-09963-3)
Supplement: Supplementary file 4 — Supplementary Data 1: source data for Supplementary Fig. 3. [file 41586_2025_9963_MOESM4_ESM.xlsx]

## Sheet: Supp Fig 3
a)	Time (s)	A414-Tet-TAMRA		b)	Time (s)	A414-Tet-Cy5
	0	-0.271827			0	0.0729156
	0.1	0.154993			0.1	-0.271437
	0.2	-0.262422			0.2	0.202558
	0.3	0.0382615			0.3	0.153597
	0.4	-0.0436391			0.4	-0.333341
	0.5	-0.0859157			0.5	-0.0787506
	0.6	0.158686			0.6	-0.71617
	0.7	0.395977			0.7	0.270691
	0.8	0.044878			0.8	0.310264
	0.9	-0.128991			0.9	0.389673
	1	0.120494			1	-0.0401431
	1.1	-0.0671814			1.1	-0.104723
	1.2	0.0683751			1.2	-0.0152675
	1.3	-0.0497884			1.3	-0.0562003
	1.4	0.0564683			1.4	-0.462808
	1.5	-0.0206696			1.5	0.681379
	1.6	-0.110558			1.6	0.00995899
	1.7	0.215703			1.7	-0.284731
	1.8	0.130667			1.8	0.758112
	1.9	-0.146912			1.9	0.49909
	2	0.100282			2	0.356505
	2.1	0.0407634			2.1	0.163863
	2.2	0.479913			2.2	0.200935
	2.3	0.172718			2.3	-0.147323
	2.4	0.307611			2.4	-0.00719504
	2.5	-0.148509			2.5	0.453814
	2.6	0.347582			2.6	0.486806
	2.7	0.223857			2.7	-0.57727
	2.8	0.270851			2.8	0.202514
	2.9	0.164383			2.9	-0.297585
	3	0.237271			3	-0.170794
	3.1	0.52124			3.1	-0.112225
	3.2	-0.00718024			3.2	-0.147498
	3.3	0.391637			3.3	-0.286398
	3.4	0.4972			3.4	-1.04135
	3.5	0.0859037			3.5	-0.117227
	3.6	0.121127			3.6	-0.043609
	3.7	-0.0821176			3.7	-0.432229
	3.8	0.583336			3.8	0.410951
	3.9	0.290776			3.9	0.323338
	4	0.576553			4	0.396605
	4.1	0.408593			4.1	0.0370281
	4.2	0.430748			4.2	-0.173602
	4.3	0.191377			4.3	0.487903
	4.4	0.477411			4.4	0.149911
	4.5	0.307219			4.5	0.16531
	4.6	0.636087			4.6	-0.176278
	4.7	-0.109428			4.7	-0.254766
	4.8	0.0204164			4.8	-0.387479
	4.9	0.148241			4.9	-0.37072
	5	0.0105744			5	0.358699
	5.1	0.0269123			5.1	0.244017
	5.2	-0.0932859			5.2	0.937812
	5.3	-0.0172784			5.3	-0.0396605
	5.4	0.075278			5.4	0.386646
	5.5	-0.0715221			5.5	-0.984668
	5.6	-0.262633			5.6	-0.401255
	5.7	0.290339			5.7	-0.181719
	5.8	-0.041725			5.8	-0.611447
	5.9	0.51616			5.9	0.256608
	6	0.475044			6	-0.303815
	6.1	-0.247079			6.1	-0.481804
	6.2	-0.06899			6.2	-0.37774
	6.3	-0.0785908			6.3	-0.979578
	6.4	0.128452			6.4	1.74699
	6.5	2.22955			6.5	1.75519
	6.6	6.75684			6.6	2.94944
	6.7	8.25608			6.7	2.14215
	6.8	8.80043			6.8	1.92858
	6.9	9.08493			6.9	2.15162
	7	9.26471			7	1.67359
	7.1	9.32225			7.1	1.06996
	7.2	9.34575			7.2	2.71227
	7.3	9.34077			7.3	1.90094
	7.4	9.41164			7.4	1.61945
	7.5	8.72911			7.5	1.39707
	7.6	9.57989			7.6	2.19536
	7.7	9.25488			7.7	2.02826
	7.8	9.34881			7.8	1.79288
	7.9	9.29812			7.9	2.41964
	8	8.87181			8	2.07682
	8.1	9.06913			8.1	1.9649
	8.2	9.04089			8.2	2.39902
	8.3	9.34679			8.3	1.88023
	8.4	9.55409			8.4	2.09073
	8.5	9.22605			8.5	1.53912
	8.6	9.47678			8.6	2.33953
	8.7	9.31655			8.7	1.5164
	8.8	9.0485			8.8	1.73067
	8.9	9.41024			8.9	2.07099
	9	8.82976			9	1.4953
	9.1	9.14948			9.1	2.37243
	9.2	9.07346			9.2	1.98903
	9.3	9.56467			9.3	2.25595
	9.4	8.98037			9.4	2.71622
	9.5	9.11121			9.5	2.28328
	9.6	9.14966			9.6	1.91827
	9.7	8.84293			9.7	2.06581
	9.8	8.90798			9.8	2.17755
	9.9	9.14544			9.9	2.63834
	10	9.03848			10	1.37925
	10.1	9.15852			10.1	2.24038
	10.2	9.15724			10.2	2.44171
	10.3	8.77455			10.3	2.26881
	10.4	8.63205			10.4	1.73949
	10.5	9.24831			10.5	2.54244
	10.6	9.04146			10.6	1.85303
	10.7	9.28926			10.7	1.66109
	10.8	9.11289			10.8	2.31549
	10.9	9.2027			10.9	2.2502
	11	9.13834			11	2.2721
	11.1	8.8223			11.1	1.60638
	11.2	8.99218			11.2	2.0927
	11.3	8.84703			11.3	1.60046
	11.4	9.24079			11.4	2.068
	11.5	8.84295			11.5	1.06934
	11.6	8.7324			11.6	0.901047
	11.7	8.38528			11.7	1.56681
	11.8	6.99066			11.8	1.16617
	11.9	5.40144			11.9	1.15704
	12	4.12515			12	0.657995
	12.1	2.96388			12.1	0.123588
	12.2	2.39143			12.2	0.393139
	12.3	1.25378			12.3	0.945446
	12.4	1.22038			12.4	0.432536
	12.5	0.777959			12.5	0.248887
	12.6	1.03656			12.6	0.276877
	12.7	0.230775			12.7	-0.100906
	12.8	0.249795			12.8	-0.027815
	12.9	0.0704248			12.9	0.24235
	13	0.0730323			13	-0.229276
	13.1	-0.0708438			13.1	0.0114945
	13.2	-0.31855			13.2	-0.198829
	13.3	-0.370036			13.3	-0.016145
	13.4	-0.260508			13.4	-0.388708
	13.5	-0.464928			13.5	0.410863
	13.6	-0.630327			13.6	-0.205541
	13.7	-0.405183			13.7	0.0937988
	13.8	-0.0923213			13.8	-0.122009
	13.9	-0.079269			13.9	0.0279905
	14	-0.363389			14	-0.283809
	14.1	-0.296982			14.1	0.0365894
	14.2	-0.473489			14.2	-0.215237
	14.3	-0.207109			14.3	-0.0395727
	14.4	-0.607177			14.4	-0.297585
	14.5	-0.605579			14.5	-0.855332
	14.6	-0.48312			14.6	-0.268717
	14.7	-0.635376			14.7	-0.8527
	14.8	-0.360194			14.8	-0.622722
	14.9	-0.202436			14.9	-0.320574
	15	-0.453443			15	0.0907716
	15.1	-0.312838			15.1	-0.692523
	15.2	-0.647418			15.2	-0.0502337
	15.3	-0.168284			15.3	-0.0746705
	15.4	-0.213499			15.4	-0.390463
	15.5	-0.696854			15.5	0.391559
	15.6	-0.28393			15.6	-0.788559
	15.7	-0.462878			15.7	-0.956107
	15.8	-0.575737			15.8	-0.888675
	15.9	-0.549707			15.9	-0.340668
	16	-0.558751			16	-0.32132
	16.1	-0.322348			16.1	-0.450918
	16.2	-0.708218			16.2	-0.348608
	16.3	-0.677743			16.3	-0.15737
	16.4	-0.589949			16.4	-0.485577
	16.5	-0.776976			16.5	-1.42234
	16.6	-0.362048			16.6	-0.741923
	16.7	-0.626001			16.7	-0.291838
	16.8	-0.575028			16.8	0.404282
	16.9	-0.116165			16.9	0.106478
	17	0.19513			17	0.504267
	17.1	0.0815328			17.1	-0.0640095
	17.2	0.0957456			17.2	0.645623
	17.3	0.351983			17.3	0.107224
	17.4	0.285501			17.4	0.487596
	17.5	0.502611			17.5	-0.376774
	17.6	0.137208			17.6	-0.284029
	17.7	0.201897			17.7	0.110426
	17.8	-0.265889			17.8	1.2694
	17.9	-0.610432			17.9	0.924168
	18	-0.440783			18	-0.232917
	18.1	-0.469721			18.1	-0.0837081
	18.2	-1.17733			18.2	0.699498
	18.3	-0.760066			18.3	0.616711
	18.4	-1.17833			18.4	0.556299
	18.5	-0.794882			18.5	0.808872
	18.6	-0.707103			18.6	0.190493
	18.7	-0.959647			18.7	0.751706
	18.8	-1.26341			18.8	0.269989
	18.9	-1.19166			18.9	0.65238
	19	-1.33575			19	0.376248
	19.1	-1.49404			19.1	0.773511
	19.2	-1.07368			19.2	1.75515
	19.3	-1.39126			19.3	1.13239
	19.4	-1.64955			19.4	1.07399
	19.5	-1.87786			19.5	1.68452
	19.6	-1.53535			19.6	1.46011
	19.7	-1.28122			19.7	1.49578
	19.8	-2.01394			19.8	1.40812
	19.9	-1.34454			19.9	1.97793
	20	-1.13091			20	1.50798
	20.1	-1.29693			20.1	1.21127
	20.2	-1.32764			20.2	1.05517
	20.3	-1.04551			20.3	1.78643
	20.4	-1.53099			20.4	1.73102
	20.5	-1.56649			20.5	1.67386
	20.6	-2.08449			20.6	1.36846
	20.7	-2.30878			20.7	1.96679
	20.8	-2.03906			20.8	1.29427
	20.9	-1.89374			20.9	2.15053
	21	-2.2897			21	1.70356
	21.1	-2.14654			21.1	1.76884
	21.2	-2.43704			21.2	1.67649
	21.3	-2.26049			21.3	1.36443
	21.4	-2.25117			21.4	1.6549
	21.5	-2.60299			21.5	0.881612
	21.6	-2.53481			21.6	1.41023
	21.7	-2.92537			21.7	0.893413
	21.8	-2.57284			21.8	1.63218
	21.9	-3.08686			21.9	1.45392
	22	-2.9996			22	1.14884
	22.1	-3.18852			22.1	1.33341
	22.2	-3.06635			22.2	1.65784
	22.3	-3.20269			22.3	1.8275
	22.4	-3.40869			22.4	1.43896
	22.5	-3.55264			22.5	1.48972
	22.6	-3.61585			22.6	0.833923
	22.7	-3.53071			22.7	1.21794
	22.8	-3.60041			22.8	1.66065
	22.9	-3.46179			22.9	0.600566
	23	-3.95514			23	1.68566
	23.1	-3.7503			23.1	1.18126
	23.2	-4.36245			23.2	1.73484
	23.3	-3.95634			23.3	2.0501
	23.4	-4.56801			23.4	1.95788
	23.5	-4.05304			23.5	1.31757
	23.6	-3.90873			23.6	1.76472
	23.7	-3.45995			23.7	2.09599
	23.8	-3.1977			23.8	1.97925
	23.9	-3.23949			23.9	1.72001
	24	-3.4398			24	1.46489
	24.1	-3.30405			24.1	1.57835
	24.2	-3.39805			24.2	1.20341
	24.3	-3.54435			24.3	1.56769
	24.4	-3.51359			24.4	2.10135
	24.5	-3.37089			24.5	1.93367
	24.6	-3.85186			24.6	1.38992
	24.7	-3.65409			24.7	2.23889
	24.8	-3.61065			24.8	1.32854
	24.9	-3.48511			24.9	1.85171
	25	-3.80573			25	1.66008
	25.1	-3.91238			25.1	1.27769
	25.2	-3.61064			25.2	1.63959
	25.3	-3.48902			25.3	1.51407
	25.4	-3.82733			25.4	1.34657
	25.5	-3.81835			25.5	1.68526
	25.6	-4.06812			25.6	1.93801
	25.7	-3.97931			25.7	0.89802
	25.8	-4.5071			25.8	1.07504
	25.9	-3.58978			25.9	1.50758
	26	-3.76265			26	1.47147
	26.1	-3.88873			26.1	1.96315
	26.2	-4.47118			26.2	1.89984
	26.3	-4.4027			26.3	1.68153
	26.4	-4.093			26.4	1.76937
	26.5	-4.23341			26.5	1.78055
	26.6	-4.2737			26.6	1.68096
	26.7	-4.51176			26.7	1.71887
	26.8	-4.58064			26.8	1.68342
	26.9	-4.01023			26.9	1.90853
	27	-4.58321			27	2.5885
	27.1	-4.45748			27.1	1.74072
	27.2	-3.95903			27.2	2.01452
	27.3	-3.86122			27.3	2.18852
	27.4	-3.28697			27.4	2.24889
	27.5	-2.57731			27.5	1.89208
	27.6	-2.03484			27.6	1.54228
	27.7	-1.81716			27.7	1.39492
	27.8	-2.00805			27.8	1.32428
	27.9	-1.69451			27.9	1.85935
	28	-1.33274			28	1.86676
	28.1	-1.53146			28.1	1.75998
	28.2	-1.77588			28.2	1.85654
	28.3	-1.78604			28.3	1.56847
	28.4	-1.88425			28.4	1.37886
	28.5	-1.97279			28.5	1.51706
	28.6	-1.56536			28.6	1.44313
	28.7	-2.04927			28.7	1.70974
	28.8	-1.53488			28.8	2.10666
	28.9	-1.62008			28.9	0.772853
	29	-1.74265			29	1.63766
	29.1	-2.02609			29.1	1.40957
	29.2	-2.07519			29.2	1.31603
	29.3	-2.24428			29.3	1.85461
	29.4	-1.71005			29.4	1.62577
	29.5	-1.79597			29.5	1.06079
	29.6	-1.95539			29.6	1.41343
	29.7	-2.17253			29.7	1.763
	29.8	-1.96838			29.8	1.4004
	29.9	-2.19144			29.9	0.997654
	30	-2.01545			30	1.66859
	30.1	-1.8587			30.1	0.909602
	30.2	-2.22317			30.2	1.45204
	30.3	-1.79166			30.3	1.19157
	30.4	-1.81587			30.4	1.01533
	30.5	-2.02229			30.5	0.963872
	30.6	-2.54492			30.6	1.46967
	30.7	-1.85415			30.7	1.73668
	30.8	-2.16562			30.8	0.191063
	30.9	-2.24397			30.9	1.01402
	31	-2.13895			31	0.767149
	31.1	-1.7815			31.1	1.28203
	31.2	-2.35001			31.2	1.17656
	31.3	-2.2062			31.3	1.01841
	31.4	-2.4185			31.4	0.700244
	31.5	-2.38086			31.5	1.26821
	31.6	-1.97807			31.6	1.40988
	31.7	-2.28936			31.7	0.932284
	31.8	-1.07552			31.8	1.83658
	31.9	-0.574199			31.9	1.71961
	32	0.148331			32	1.03082
	32.1	0.525083			32.1	1.62516
	32.2	0.0164525			32.2	1.54364
	32.3	0.455783			32.3	1.78924
	32.4	0.291047			32.4	0.92601
	32.5	0.322818			32.5	0.987519
	32.6	0.592108			32.6	1.39593
	32.7	0.705704			32.7	1.75949
	32.8	0.776587			32.8	1.85382
	32.9	0.417349			32.9	1.54127
	33	0.432632			33	1.24856
	33.1	0.729623			33.1	1.28493
	33.2	0.737084			33.2	1.33806
	33.3	0.818608			33.3	1.36324
	33.4	0.663051			33.4	1.48867
	33.5	0.798683			33.5	1.35776
	33.6	0.543169			33.6	1.60107
	33.7	0.604165			33.7	1.32911
	33.8	0.495271			33.8	1.08777
	33.9	1.10496			33.9	1.72992
	34	0.365864			34	1.75555
	34.1	1.17082			34.1	0.796236
	34.2	1.10737			34.2	1.24751
	34.3	1.0126			34.3	1.51363
	34.4	0.833062			34.4	1.36026
	34.5	0.959861			34.5	0.826903
	34.6	0.681529			34.6	0.871126
	34.7	1.20032			34.7	0.658171
	34.8	0.911481			34.8	0.741879
	34.9	1.2425			34.9	0.539409
	35	1.10121			35	0.140084
	35.1	1.13194			35.1	0.29798
	35.2	1.19446			35.2	0.326672
	35.3	0.905708			35.3	-0.187861
	35.4	1.21094			35.4	-0.0219361
	35.5	0.857433			35.5	0.579596
	35.6	1.4661			35.6	0.464387
	35.7	1.32145			35.7	-0.132977
	35.8	0.936003			35.8	-0.247132
	35.9	1.44102			35.9	-0.297585
	36	1.44194			36	-0.279247
	36.1	1.35114			36.1	-0.806722
	36.2	1.20392			36.2	-0.137057
	36.3	0.913983			36.3	-0.148069
	36.4	1.18535			36.4	-0.315617
	36.5	1.68468			36.5	-0.591617
	36.6	1.32716			36.6	-0.978262
	36.7	0.442082			36.7	-0.370281
	36.8	-0.368544			36.8	-0.848883
	36.9	-1.75983			36.9	-0.687346
	37	-2.74664			37	-0.988835
	37.1	-3.93966			37.1	-0.27543
	37.2	-4.92632			37.2	-1.12036
	37.3	-5.24134			37.3	-0.822604
	37.4	-5.59803			37.4	-0.967031
	37.5	-5.8472			37.5	-0.421656
	37.6	-5.97174			37.6	-0.841907
	37.7	-6.09177			37.7	-1.0972
	37.8	-6.11785			37.8	-0.342379
	37.9	-6.67667			37.9	-1.25018
	38	-6.38374			38	-0.91434
	38.1	-6.43672			38.1	-1.30849
	38.2	-6.35853			38.2	-0.230548
	38.3	-6.34597			38.3	-0.819182
	38.4	-6.49077			38.4	-0.522649
	38.5	-6.43315			38.5	-0.0740563
	38.6	-6.61525			38.6	-0.898108
	38.7	-6.39384			38.7	-0.5137
	38.8	-6.70841			38.8	-0.374449
	38.9	-6.62818			38.9	0.0207077
	39	-6.91424			39	-0.769211
	39.1	-6.83721			39.1	-0.287012
	39.2	-6.43423			39.2	-1.11949
	39.3	-6.76767			39.3	-0.766623
	39.4	-6.25948			39.4	-0.57534
	39.5	-6.48155			39.5	-0.544717
	39.6	-6.52099			39.6	-0.895124
	39.7	-6.26314			39.7	-0.470398
	39.8	-6.56034			39.8	0.219756
	39.9	-6.19045			39.9	-0.758682
	40	-6.09366			40	0.419111
	40.1	-5.54958			40.1	0.0685284
	40.2	-5.85339			40.2	-0.47518
	40.3	-5.82782			40.3	-0.878102
	40.4	-6.29069			40.4	-0.0180753
	40.5	-5.99906			40.5	0.0439599
	40.6	-5.98553			40.6	-0.38919
	40.7	-5.98246			40.7	-0.519842
	40.8	-5.72549			40.8	-0.214623
	40.9	-5.78426			40.9	-0.239279
	41	-5.64723			41	-0.460132
	41.1	-5.82946			41.1	-0.348916
	41.2	-5.7351			41.2	-0.276044
	41.3	-6.11097			41.3	0.072784
	41.4	-5.75085			41.4	-0.0979227
	41.5	-5.68405			41.5	-0.339527
	41.6	-5.07337			41.6	-0.186457
	41.7	-5.71309			41.7	0.973612
	41.8	-5.76174			41.8	-0.365894
	41.9	-4.30792			41.9	0.0157062
	42	0.213367			42	0.156843
	42.1	2.21033			42.1	-0.0273762
	42.2	3.04079			42.2	0.459605
	42.3	3.62882			42.3	0.212517
	42.4	3.84064			42.4	-0.418541
	42.5	3.92567			42.5	-0.642815
	42.6	3.53676			42.6	-0.121526
	42.7	3.93237			42.7	-0.416172
	42.8	3.97119			42.8	-0.277667
	42.9	3.75863			42.9	-0.42964
	43	3.66692			43	0.328208
	43.1	3.5764			43.1	-0.399412
	43.2	3.77687			43.2	-0.592406
	43.3	3.94186			43.3	-0.135784
	43.4	3.82373			43.4	0.560511
	43.5	4.00732			43.5	0.366201
	43.6	4.23962			43.6	0.461974
	43.7	3.92759			43.7	0.473205
	43.8	3.92855			43.8	0.517473
	43.9	3.71104			43.9	0.542699
	44	4.2012			44	0.926142
	44.1	3.87975			44.1	0.826596
	44.2	4.01543			44.2	0.620002
	44.3	4.07217			44.3	0.918552
	44.4	3.92189			44.4	0.815891
	44.5	3.89936			44.5	0.201637
	44.6	4.22589			44.6	1.00252
	44.7	3.60583			44.7	1.22237
	44.8	3.99329			44.8	1.02687
	44.9	3.99388			44.9	0.780969
	45	4.03237			45	0.769869
	45.1	3.95989			45.1	1.19065
	45.2	3.98525			45.2	0.203435
	45.3	4.08554			45.3	1.3388
	45.4	3.58624			45.4	1.02507
	45.5	4.01036			45.5	0.846997
	45.6	3.84192			45.6	0.703227
	45.7	3.57265			45.7	1.40733
	45.8	4.04102			45.8	1.13493
	45.9	4.15938			45.9	1.34416
	46	4.01932			46	1.12374
	46.1	4.27959			46.1	0.775485
	46.2	3.74557			46.2	1.12466
	46.3	3.92863			46.3	1.05767
	46.4	4.12352			46.4	0.56038
	46.5	3.82662			46.5	0.917368
	46.6	4.20297			46.6	0.620923
	46.7	4.26231			46.7	0.67357
	46.8	3.84118			46.8	0.532828
	46.9	3.26212			46.9	1.06166
	47	2.18614			47	0.624126
	47.1	1.71558			47.1	0.915042
	47.2	0.613043			47.2	0.802949
	47.3	-0.243387			47.3	1.25843
	47.4	-1.70658			47.4	0.39213
	47.5	-2.06558			47.5	0.645097
	47.6	-2.59469			47.6	0.461185
	47.7	-2.6924			47.7	0.746924
	47.8	-3.29012			47.8	0.551693
	47.9	-3.93295			47.9	0.358129
	48	-4.02237			48	1.17104
	48.1	-4.10388			48.1	1.17349
	48.2	-3.86225			48.2	0.9311
	48.3	-3.91601			48.3	0.941804
	48.4	-4.16415			48.4	0.627987
	48.5	-4.01763			48.5	1.0023
	48.6	-4.56333			48.6	0.809267
	48.7	-4.44583			48.7	0.184307
	48.8	-4.19477			48.8	0.379363
	48.9	-4.22437			48.9	1.07553
	49	-4.42784			49	1.28686
	49.1	-4.48916			49.1	0.725471
	49.2	-4.30878			49.2	0.839626
	49.3	-4.30606			49.3	0.617852
	49.4	-4.23454			49.4	0.933381
	49.5	-4.01214			49.5	0.537347
	49.6	-4.49843			49.6	1.60283
	49.7	-4.59631			49.7	1.60761
	49.8	-4.48999			49.8	1.18753
	49.9	-4.25638			49.9	2.07463
	50	-4.66957			50	2.07011
	50.1	-4.52056			50.1	1.51723
	50.2	-4.5537			50.2	1.54715
	50.3	-4.3751			50.3	2.27868
	50.4	-4.60189			50.4	2.44342
	50.5	-4.61985			50.5	2.12767
	50.6	-4.40068			50.6	2.38577
	50.7	-4.54825			50.7	2.38783
	50.8	-4.56235			50.8	2.60983
	50.9	-4.38794			50.9	2.50102
	51	-4.38719			51	2.4704
	51.1	-4.60288			51.1	1.73243
	51.2	-4.5274			51.2	2.1221
	51.3	-4.15412			51.3	1.97644
	51.4	-4.53224			51.4	2.69801
	51.5	-4.17011			51.5	2.41209
	51.6	-4.19223			51.6	1.90318
	51.7	-4.26366			51.7	2.53972
	51.8	-4.16773			51.8	2.55292
	51.9	-3.98937			51.9	2.48786
	52	-4.21991			52	1.82688
	52.1	-4.18807			52.1	2.4092
	52.2	-3.92403			52.2	2.16395
	52.3	-4.32202			52.3	1.7222
	52.4	-4.21228			52.4	2.48957
	52.5	-4.14427			52.5	1.91471
	52.6	-4.32149			52.6	2.2821
	52.7	-4.63832			52.7	3.22096
					52.8	2.47474
					52.9	2.45798
					53	2.84524
					53.1	3.11672
					53.2	2.63514
					53.3	2.97861
					53.4	1.93213
					53.5	1.94358
					53.6	1.71983
					53.7	1.30888
					53.8	0.885341
					53.9	1.2064
					54	1.19806
					54.1	0.956414
					54.2	0.395288
					54.3	0.79571
					54.4	0.652116
					54.5	0.5588
					54.6	1.59063
					54.7	0.773906
					54.8	0.818611
					54.9	0.864282
					55	1.7652
					55.1	0.674096
					55.2	0.574112
					55.3	0.634216
					55.4	0.952027
					55.5	1.03911
					55.6	1.02591
					55.7	1.22171
					55.8	0.774169
					55.9	0.854323
					56	1.06745
					56.1	0.990766
					56.2	0.483384
					56.3	0.107531
					56.4	0.544586
					56.5	0.769123
					56.6	1.16827
					56.7	1.4824
					56.8	1.0786
					56.9	1.12374
					57	0.811811
					57.1	0.738018
					57.2	1.12857
					57.3	1.02797
					57.4	0.913989
					57.5	0.965408
					57.6	0.523922
					57.7	0.715336
					57.8	1.35082
					57.9	1.65503
					58	1.33214
					58.1	2.30838
					58.2	2.7725
					58.3	2.67603
					58.4	2.59223
					58.5	3.07636
					58.6	2.51998
					58.7	2.26174
					58.8	2.99656
					58.9	3.24466
					59	3.3775
					59.1	3.05789
					59.2	2.63268
					59.3	3.50337
					59.4	2.33922
					59.5	2.56622
					59.6	2.54665
					59.7	2.72617
					59.8	2.6422
					59.9	2.90329
					60	3.05776
					60.1	3.10826
					60.2	3.39049
					60.3	3.02705
					60.4	3.64363
					60.5	3.16893
					60.6	3.20131
					60.7	2.54564
					60.8	3.08794
					60.9	2.79225
					61	3.29669
					61.1	3.1466
					61.2	3.53123
					61.3	3.25268
					61.4	2.95251
					61.5	3.23062
					61.6	2.91763
					61.7	3.0031
					61.8	3.02003
					61.9	3.24874
					62	3.02968
					62.1	3.36544
					62.2	3.19811
					62.3	2.91855
					62.4	3.11339
					62.5	2.33549
					62.6	2.46092
					62.7	2.52024
					62.8	2.18536
					62.9	2.62312
					63	2.35664
					63.1	1.95582
					63.2	1.80815
					63.3	1.70088
					63.4	2.11683
					63.5	1.94437
					63.6	1.46349
					63.7	1.68017
					63.8	1.60138
					63.9	1.49907
					64	1.33692
					64.1	1.39904
					64.2	1.49218
					64.3	1.47674
					64.4	1.29019
					64.5	1.26348
					64.6	1.47209
					64.7	1.4147
					64.8	1.45265
					64.9	1.23961
					65	1.4917
					65.1	0.941629
					65.2	1.45423
					65.3	1.77432
					65.4	1.57334
					65.5	1.99325
					65.6	2.00377
					65.7	1.72462
					65.8	2.13333
					65.9	1.91989
					66	1.18964
					66.1	1.19113
					66.2	2.38831
					66.3	1.92178
					66.4	1.95328
					66.5	1.99035
					66.6	1.3653
					66.7	2.2141
					66.8	2.1887
					66.9	1.68917
					67	1.23136
					67.1	2.13745
					67.2	1.92195
					67.3	1.51833
					67.4	1.73563
					67.5	2.20813
					67.6	1.80837
					67.7	3.52381
					67.8	3.29388
					67.9	3.89102
					68	3.93441
					68.1	3.95876
					68.2	4.22485
					68.3	3.81298
					68.4	4.99853
					68.5	3.83829
					68.6	3.84421
					68.7	3.8611
					68.8	3.937
					68.9	3.85768
					69	4.62308
					69.1	4.00483
					69.2	3.88449
					69.3	4.11596
					69.4	4.88262
					69.5	4.30202
					69.6	3.83167
					69.7	4.43601
					69.8	3.41203
					69.9	4.47803
					70	3.63187
					70.1	4.00623
					70.2	4.53002
					70.3	3.75292
					70.4	4.51673
					70.5	4.7199
					70.6	4.1887
					70.7	4.43912
					70.8	4.80172
					70.9	4.01005
					71	4.33326
					71.1	4.75307
					71.2	4.2406
					71.3	5.17091
					71.4	5.14507
					71.5	4.31246
					71.6	4.4647
					71.7	4.42131
					71.8	4.33914
					71.9	4.07538
					72	4.15535
					72.1	4.23476
					72.2	4.2596
					72.3	4.20221
					72.4	3.83737
					72.5	3.62253
					72.6	3.71295
					72.7	3.42212
					72.8	3.65802
					72.9	2.82094
					73	2.41806
					73.1	1.98675
					73.2	2.702
					73.3	2.11381
					73.4	1.95398
					73.5	1.88778
					73.6	1.92314
					73.7	2.27034
					73.8	2.10345
					73.9	1.82565
					74	2.07981
					74.1	2.17975
					74.2	2.08432
					74.3	2.43495
					74.4	2.06445
					74.5	2.85871
					74.6	2.20295
					74.7	2.36458
					74.8	2.06357
					74.9	2.59206
					75	2.83989
					75.1	1.94915
					75.2	2.20971
					75.3	2.28149
					75.4	2.06274
					75.5	2.50637
					75.6	2.57644
					75.7	2.94518
					75.8	3.29686
					75.9	2.92193
					76	3.57931
					76.1	4.50287
					76.2	5.16999
					76.3	4.7024
					76.4	5.37171
					76.5	5.25001
					76.6	5.94481
					76.7	5.3693
					76.8	5.41106
					76.9	5.10993
					77	5.05083
					77.1	5.05513
					77.2	5.01569
					77.3	5.46003
					77.4	5.4803
					77.5	5.53588
					77.6	5.72234
					77.7	5.14805
					77.8	5.05732
					77.9	5.18223
					78	5.76884
					78.1	5.73585
					78.2	5.44717
					78.3	5.86992
					78.4	5.13107
					78.5	5.36978
					78.6	5.12892
					78.7	5.32236
					78.8	5.24983
					78.9	5.39066
					79	5.29498
					79.1	5.2719
					79.2	5.95148
					79.3	5.96526
					79.4	4.82669
					79.5	5.0131
					79.6	5.42708
					79.7	5.19315
					79.8	4.92737
					79.9	5.73203
					80	4.74605
					80.1	5.61147
					80.2	5.08352
					80.3	5.49346
					80.4	5.68215
					80.5	4.93233
					80.6	4.72933
					80.7	4.82226
					80.8	4.46176
					80.9	4.40999
					81	4.23266
					81.1	4.42995
					81.2	4.24643
					81.3	3.92274
					81.4	3.81087
					81.5	3.70606
					81.6	3.40777
					81.7	3.4294
					81.8	4.06621
					81.9	4.45018
					82	4.15803
					82.1	3.12541
					82.2	3.13647
					82.3	3.8536
					82.4	3.79086
					82.5	3.65635
					82.6	3.5017
					82.7	3.53742
					82.8	4.13846
					82.9	3.81113
					83	4.17646
					83.1	3.31139
					83.2	3.14265
					83.3	3.2114
					83.4	3.86374
					83.5	3.52667
					83.6	3.40435
					83.7	4.12579
					83.8	3.75976
					83.9	3.81728
					84	4.03466
					84.1	3.55255
					84.2	3.87466
					84.3	4.14386
					84.4	3.77647
					84.5	4.03901
					84.6	4.21831
					84.7	4.00948
					84.8	4.12368
					84.9	3.88637
					85	3.43252
					85.1	4.26368
					85.2	3.74607
					85.3	3.51157
					85.4	4.29228
					85.5	4.31562
					85.6	4.18541
					85.7	5.48104
					85.8	6.28724
					85.9	6.03993
					86	5.77634
					86.1	6.23779
					86.2	6.38915
					86.3	6.12605
					86.4	5.88322
					86.5	6.31935
					86.6	5.87528
					86.7	6.60443
					86.8	5.8239
					86.9	6.55091
					87	6.84648
					87.1	6.79111
					87.2	5.54777
					87.3	6.32102
					87.4	6.61215
					87.5	6.02146
					87.6	6.22511
					87.7	6.61136
					87.8	6.60842
					87.9	6.2005
					88	5.88396
					88.1	6.43298
					88.2	6.21744
					88.3	5.96017
					88.4	6.40977
					88.5	6.51063
					88.6	5.78328
					88.7	6.80401
					88.8	6.56828
					88.9	6.65572
					89	5.93336
					89.1	6.40872
					89.2	7.21114
					89.3	6.74123
					89.4	6.43237
					89.5	6.59338
					89.6	5.79644
					89.7	6.81138
					89.8	7.04158
					89.9	6.58789
					90	6.51151
					90.1	7.07523
					90.2	7.35438
					90.3	6.83283
					90.4	7.23233
					90.5	6.78769
					90.6	7.14283
					90.7	7.08593
					90.8	6.64874
					90.9	6.38231
					91	7.54207
					91.1	6.51432
					91.2	6.77839
					91.3	6.69165
					91.4	6.9326
					91.5	7.13923
					91.6	7.03535
					91.7	7.28248
					91.8	6.64076
					91.9	6.46413
					92	6.82033
					92.1	6.91321
					92.2	6.55942
					92.3	7.04022
					92.4	7.69944
					92.5	7.11835
					92.6	6.69569
					92.7	7.36575
					92.8	6.6186
					92.9	6.88758
					93	6.54639
					93.1	7.17771
					93.2	6.72157
					93.3	7.40295
					93.4	6.59654
					93.5	6.75083
					93.6	7.0858
					93.7	6.789
					93.8	7.25887
					93.9	7.38009
					94	6.79655
					94.1	7.0185
					94.2	7.69198
					94.3	6.7625
					94.4	7.20741
					94.5	6.84652
					94.6	7.59564
					94.7	7.25528
					94.8	6.75557
					94.9	6.53704
					95	6.93843
					95.1	6.22349
					95.2	6.96155
					95.3	6.07823
					95.4	6.24393
					95.5	6.46215
					95.6	5.91665
					95.7	6.32387
					95.8	6.2875
					95.9	6.20445
					96	5.82447
					96.1	5.72773
					96.2	5.59169
					96.3	5.83636
					96.4	5.07334
					96.5	5.42111
					96.6	5.78679
					96.7	5.88958
					96.8	5.67346
					96.9	5.4541
					97	6.31229
					97.1	5.41747
					97.2	5.73313
					97.3	5.8024
					97.4	5.88989
					97.5	6.20081
					97.6	4.97616
					97.7	5.93143
					97.8	6.02449
					97.9	5.63709
					98	5.83211
					98.1	5.43743
					98.2	6.29241
					98.3	5.72721
					98.4	6.38814
					98.5	5.61573
					98.6	5.82653
					98.7	6.09051
					98.8	5.8178
					98.9	5.80298
					99	6.44711
					99.1	5.28186
					99.2	5.83136
					99.3	5.82645
					99.4	5.93477
					99.5	5.9764
					99.6	5.92402
					99.7	6.24038
					99.8	6.27092
					99.9	6.28776
					100	5.79683
					100.1	5.64762
					100.2	6.30013
					100.3	6.15439
					100.4	5.71334
					100.5	6.91057
					100.6	6.12408
					100.7	5.96929
					100.8	6.32628
					100.9	6.37323
					101	6.36085
					101.1	6.32479
					101.2	5.73568
					101.3	6.10126
					101.4	6.87486
					101.5	6.75842
					101.6	6.05853
					101.7	6.65502
					101.8	6.01102
					101.9	5.90169
					102	6.2889
					102.1	6.28873
					102.2	5.89392
					102.3	5.69496
					102.4	6.23779
					102.5	6.5109
					102.6	6.40372
					102.7	6.25898
					102.8	6.33251
					102.9	5.95789
					103	5.87835
					103.1	5.42589
					103.2	5.61919
					103.3	5.89186
					103.4	6.45048
					103.5	6.35072
					103.6	5.98338
					103.7	6.6415
					103.8	6.62615
					103.9	6.14619
					104	5.69764
					104.1	6.1157
					104.2	6.53016
					104.3	6.29412
					104.4	5.81587
					104.5	6.43623
