# Supplementary material for: Ligand-specific activation trajectories dictate GPCR signalling in cells
Source: Nature. 2026 Jan 14;650(8103):1053–62. doi: 10.1038/s41586-025-09963-3 (PMC12935549; doi:10.1038/s41586-025-09963-3)
Supplement: Supplementary file 5 — Supplementary Data 2: source data for Supplementary Fig. 4. [file 41586_2025_9963_MOESM5_ESM.xlsx]

## Sheet: Supp Fig 4
a)	Time (s)	E175-Ixo		Time (s)	F181-Ixo		b)	Time (s)	E175-ACh		Time (s)	F181-ACh		c)	Time (s)	E175-Arec		Time (s)	F181-Arec		d)	Time (s)	E175-Pilo		Time (s)	F181-Pilo
	0	1.63126		0	0.352512			0	0.456493		0	0.384677			0	-1.26819		0	0.191811			0	0.407336		0	-1.25822
	0.1	0.243792		0.1	-1.12725			0.1	0.403738		0.1	1.69281			0.1	-1.47926		0.1	0.999229			0.1	-1.21934		0.1	0.307747
	0.2	-0.0727517		0.2	0.560362			0.2	-0.505378		0.2	-1.0191			0.2	0.738359		0.2	0.207154			0.2	-0.538786		0.2	0.244384
	0.3	-1.04348		0.3	-0.733809			0.3	0.0139148		0.3	-0.583631			0.3	0.881319		0.3	0.177779			0.3	0.119551		0.3	-0.382601
	0.4	-0.484538		0.4	0.784336			0.4	0.687248		0.4	0.180335			0.4	0.0691038		0.4	0.839758			0.4	0.709318		0.4	-0.42628
	0.5	0.448102		0.5	-0.492358			0.5	-0.227751		0.5	0.0309801			0.5	-0.685743		0.5	-0.343035			0.5	-0.746531		0.5	0.483254
	0.6	0.0580906		0.6	0.804362			0.6	-0.209632		0.6	-0.289835			0.6	-0.220207		0.6	-0.233945			0.6	0.638207		0.6	1.27256
	0.7	0.135603		0.7	-0.480967			0.7	0.487849		0.7	0.0508676			0.7	0.476689		0.7	0.875304			0.7	-0.604974		0.7	0.468049
	0.8	-0.0883888		0.8	0.938819			0.8	-0.281183		0.8	-2.03138			0.8	0.710333		0.8	-0.674225			0.8	0.627514		0.8	0.0311769
	0.9	0.100819		0.9	-0.60601			0.9	-0.160341		0.9	1.58427			0.9	0.895451		0.9	0.0358838			0.9	-0.343417		0.9	0.147404
	1	0.254446		1	1.7143			1	0.343083		1	-1.12527			1	-0.224278		1	0.896302			1	-0.360944		1	0.971934
	1.1	0.0524651		1.1	-0.876173			1.1	-0.715506		1.1	-0.0630695			1.1	-0.280879		1.1	-0.0467053			1.1	-0.031344		1.1	0.0769117
	1.2	0.37461		1.2	1.27821			1.2	-0.429081		1.2	-0.0236115			1.2	-1.68236		1.2	0.150511			1.2	0.54419		1.2	-0.335568
	1.3	0.117907		1.3	-1.05755			1.3	0.316315		1.3	0.610174			1.3	-0.468039		1.3	1.53491			1.3	1.4883		1.3	-0.0942802
	1.4	0.226537		1.4	0.995515			1.4	-0.362845		1.4	0.762222			1.4	0.28761		1.4	2.18994			1.4	0.0199161		1.4	1.0683
	1.5	-0.356318		1.5	-0.387289			1.5	-0.0257694		1.5	-1.60225			1.5	-0.195695		1.7	0.299938			1.5	0.928648		1.5	0.432558
	1.6	-0.491468		1.6	0.527645			1.6	0.464978		1.6	-0.567309			1.6	-1.65562		1.8	-0.665114			1.6	0.149954		1.6	-0.0330106
	1.7	-0.278604		1.7	-0.26235			1.7	0.890109		1.7	-0.527058			1.7	0.55661		1.9	0.0358838			1.7	0.0667949		1.7	0.215316
	1.8	-0.130575		1.8	1.22911			1.8	0.0312961		1.8	-0.473893			1.8	-0.350655		2	0.896302			1.8	-0.212765		1.8	0.894626
	1.9	-0.346539		1.9	-0.284509			1.9	-0.418849		1.9	1.57745			1.9	-1.47975		2.1	-0.0467053			1.9	0.232224		1.9	0.174356
	2	0.132137		2	0.321928			2	-0.210076		2	1.27328			2	-0.563507		2.2	0.150511			2	0.723997		2	0.0367897
	2.1	0.482779		2.1	-0.568924			2.1	0.687265		2.1	0.314714			2.1	0.310877		2.3	1.89975			2.1	-0.412454		2.1	0.843581
	2.2	0.0598161		2.2	1.01528			2.2	-0.259881		2.2	-0.151335			2.2	-0.842691		2.4	0.386746			2.2	1.15168		2.2	-0.205893
	2.3	-0.335194		2.3	-0.838619			2.3	-0.331745		2.3	-0.678711			2.3	0.398326		2.5	-0.3921			2.3	0.109646		2.3	-0.396595
	2.4	-0.273204		2.4	1.08045			2.4	0.251047		2.4	0.537755			2.4	1.46502		2.6	-0.176017			2.4	1.23641		2.4	0.352885
	2.5	0.193827		2.5	-0.352492			2.5	-0.557187		2.5	0.134696			2.5	1.01648		2.9	1.77609			2.5	0.0476009		2.5	1.65369
	2.6	0.338283		2.6	0.0618556			2.6	-0.354394		2.6	-0.180731			2.6	-0.0124922		3	0.552459			2.6	-0.228786		2.6	0.915776
	2.7	0.640773		2.7	-0.425468			2.7	0.319271		2.7	-0.423342			2.7	0.623398		3.1	-0.0467053			2.7	-0.310418		2.7	0.00868643
	2.8	1.78523		2.8	0.709539			2.8	-0.854895		2.8	-0.236273			2.8	-1.25684		3.2	0.150511			2.8	0.518192		2.8	0.13562
	2.9	0.955625		2.9	-0.617661			2.9	-0.683144		2.9	0.518105			2.9	-0.0440733		3.3	1.53491			2.9	1.27852		2.9	0.762959
	3	0.0377231		3	0.0261217			3	0.186487		3	-1.18628			3	-1.39027		3.4	2.18994			3	-0.522121		3	1.67802
	3.1	-0.30484		3.1	-1.01588			3.1	-0.568917		3.1	-1.05863			3.1	-0.0596651		3.7	0.299938			3.1	0.924762		3.1	0.0744306
	3.2	-0.0713013		3.2	-0.0263609			3.2	-0.386909		3.2	-0.128199			3.2	-0.0956113		3.8	-0.665114			3.2	0.322153		3.2	-0.21276
	3.3	0.0806712		3.3	-0.501045			3.3	0.491311		3.3	0.922669			3.3	0.88899		3.9	-0.0266905			3.3	0.81241		3.3	0.427719
	3.4	0.545911		3.4	1.34646			3.4	-0.668253		3.4	-0.871722			3.4	0.119356		4	0.732854			3.4	-0.0274549		3.4	1.19104
	3.5	1.62567		3.5	-0.268176			3.5	-0.770012		3.5	-0.997069			3.5	0.57885		4.4	2.54255			3.5	0.38155		3.5	0.223735
	3.6	0.842611		3.6	0.812164			3.6	0.267606		3.6	0.871802			3.6	-1.22952		4.5	0.371594			3.6	0.671953		3.6	-0.0882743
	3.7	0.162767		3.7	-1.36547			3.7	0.813872		3.7	-0.0232153			3.7	-4.05696		4.6	-0.0467053			3.7	0.207474		3.7	0.644853
	3.8	-0.307659		3.8	0.306115			3.8	1.74603		3.8	-0.196973			3.8	-0.947666		4.7	0.150511			3.8	0.964733		3.8	0.872265
	3.9	0.218782		3.9	-0.371893			3.9	2.99094		3.9	1.18913			3.9	4.93075		4.8	1.53491			3.9	-0.31811		3.9	0.576476
	4	0.497127		4	0.256494			4	2.38495		4	-2.23271			4	9.62641		4.9	2.18994			4	1.16086		4	0.219136
	4.1	0.606555		4.1	-0.967614			4.1	3.14359		4.1	-1.19634			4.1	13.0039		5.2	0.299938			4.1	0.200157		4.1	0.474829
	4.2	1.80931		4.2	0.707927			4.2	4.15496		4.2	0.616909			4.2	14.7532		5.3	-0.665114			4.2	-0.0368194		4.2	0.553844
	4.3	0.916572		4.3	-0.703485			4.3	3.89596		4.3	0.259409			4.3	14.0788		5.4	-0.0683437			4.3	0.123627		4.3	0.199131
	4.4	0.233724		4.4	-0.0106005			4.4	4.1349		4.4	-0.217574			4.4	14.9291		5.5	1.34653			4.4	1.01584		4.4	0.420001
	4.5	-0.0087063		4.5	-0.205811			4.5	4.70022		4.5	1.07567			4.5	17.0367		5.7	0.497412			4.5	1.78118		4.5	0.990991
	4.6	-0.0613041		4.6	0.0955089			4.6	3.91141		4.6	-1.27684			4.6	16.6334		5.8	0.108856			4.6	-0.0552111		4.6	1.5285
	4.7	0.53375		4.7	-0.0271411			4.7	3.85747		4.7	-1.3922			4.7	17.3484		5.9	0.839758			4.7	1.56816		4.7	0.289937
	4.8	0.654076		4.8	-1.81207			4.8	4.60797		4.8	-1.41146			4.8	18.4939		6	-0.343035			4.8	0.297822		4.8	-0.408378
	4.9	1.27722		4.9	-1.6863			4.9	6.00296		4.9	-3.38278			4.9	17.8595		6.1	-0.290883			4.9	0.729621		4.9	-0.0937069
	5	0.898723		5	-1.93482			5	5.62082		5	-2.68941			5	18.7997		6.2	1.08849			5	-0.212589		5	0.525434
	5.1	0.433525		5.1	-2.39187			5.1	5.04271		5.1	-2.86515			5.1	20.4796		6.4	-0.224382			5.1	0.550091		5.1	-0.0868171
	5.2	0.507955		5.2	-3.69177			5.2	5.41879		5.2	-2.41281			5.2	19.2765		6.5	-0.033732			5.2	0.995186		5.2	-0.0141683
	5.3	0.801282		5.3	-1.68271			5.3	6.21977		5.3	-4.89708			5.3	20.2235		6.6	0.9573			5.3	0.340567		5.3	0.859225
	5.4	0.70989		5.4	-4.68212			5.4	4.68184		5.4	-3.20015			5.4	21.1419		6.7	0.207154			5.4	1.35899		5.4	1.86372
	5.5	0.991131		5.5	-2.42376			5.5	4.96149		5.5	-4.05824			5.5	18.8342		6.8	0.177779			5.5	0.267839		5.5	0.895253
	5.6	1.30734		5.6	-4.46585			5.6	6.4797		5.6	-6.12828			5.6	19.4143		6.9	0.839758			5.6	1.73309		5.6	0.170734
	5.7	0.313597		5.7	-2.52066			5.7	5.70231		5.7	-4.82292			5.7	21.098		7	-0.343035			5.7	0.36867		5.7	-0.226479
	5.8	-0.2798		5.8	-5.10947			5.8	5.58239		5.8	-5.37739			5.8	19.9026		7.1	-0.233945			5.8	-0.0602871		5.8	0.526084
	5.9	-0.585638		5.9	-2.39302			5.9	6.14818		5.9	-4.58878			5.9	19.1625		7.2	0.875304			5.9	-0.28354		5.9	0.245958
	6	-0.278037		6	-5.03072			6	5.5228		6	-6.70201			6	20.7406		7.3	-0.674225			6	0.259602		6	0.385784
	6.1	0.175128		6.1	-1.60105			6.1	5.71193		6.1	-4.84067			6.1	20.0157		7.4	0.0358838			6.1	1.22845		6.1	0.810272
	6.2	0.326152		6.2	-5.53381			6.2	6.70477		6.2	-5.73489			6.2	20.8922		7.5	0.896302			6.2	0.0795429		6.2	1.74915
	6.3	1.32232		6.3	-3.18863			6.3	5.80482		6.3	-4.31947			6.3	20.9304		7.6	-0.0467053			6.3	1.60836		6.3	0.883256
	6.4	1.07894		6.4	-5.2677			6.4	6.01541		6.4	-7.18747			6.4	19.9423		7.7	0.150511			6.4	0.0140446		6.4	0.11872
	6.5	0.805399		6.5	-2.91509			6.5	6.70051		6.5	-5.34063			6.5	19.5564		7.8	1.89975			6.5	3.53842		6.5	0.148866
	6.6	0.18069		6.6	-5.21215			6.6	6.21145		6.6	-5.7383			6.6	21.0984		7.9	0.386746			6.6	5.18582		6.6	0.774482
	6.7	-0.246745		6.7	-3.30062			6.7	6.62611		6.7	-6.35782			6.7	19.4489		8	-0.460969			6.7	7.51936		6.7	1.11073
	6.8	-0.150643		6.8	-5.35743			6.8	7.23104		6.8	-5.85834			6.8	20.5085		8.1	0.636242			6.8	8.00284		6.8	0.0930263
	6.9	-0.0136959		6.9	-2.96497			6.9	6.52526		6.9	-6.45718			6.9	21.5347		8.2	-0.149775			6.9	9.23274		6.9	0.199846
	7	0.272279		7	-6.27288			7	6.846		7	-5.96728			7	19.7751		8.3	-1.90787			7	10.446		7	0.968883
	7.1	1.03131		7.1	-3.39185			7.1	7.36367		7.1	-8.07377			7.1	20.5782		8.4	0.718658			7.1	9.37832		7.1	1.46694
	7.2	1.10857		7.2	-5.9571			7.2	6.33573		7.2	-8.6616			7.2	22.0915		8.5	1.25436			7.2	10.6895		7.2	0.3956
	7.3	0.501789		7.3	-3.36969			7.3	6.59732		7.3	-6.43737			7.3	20.2882		8.6	-0.0951658			7.3	9.53613		7.3	-0.115868
	7.4	-0.0165477		7.4	-6.38206			7.4	7.12214		7.4	-6.73362			7.4	19.8473		8.7	-0.249766			7.4	10.2678		7.4	0.930382
	7.5	-0.0569747		7.5	-2.87837			7.5	8.15637		7.5	-7.21108			7.5	22.0988		8.8	1.07867			7.5	9.51875		7.5	0.362558
	7.6	0.189544		7.6	-6.4555			7.6	7.34161		7.6	-7.20134			7.6	20.1092		8.9	0.0829663			7.6	9.86937		7.6	0.373379
	7.7	0.213034		7.7	-3.52834			7.7	6.68379		7.7	-7.40441			7.7	19.0839		9	0.0671111			7.7	10.4994		7.7	0.592965
	7.8	0.634887		7.8	-6.53732			7.8	6.8404		7.8	-7.00119			7.8	20.5193		9.1	0.853678			7.8	10.0601		7.8	1.48699
	7.9	0.902908		7.9	-4.88191			7.9	7.88798		7.9	-6.27574			7.9	20.0874		9.2	0.100256			7.9	11.002		7.9	0.356888
	8	-0.145653		8	-6.49841			8	7.0472		8	-8.27613			8	21.255		9.3	0.702981			8	9.61119		8	0.0839473
	8.1	-0.988355		8.1	-4.85517			8.1	7.21173		8.1	-4.99786			8.1	22.7985		9.4	1.05594			8.1	11.1149		8.1	0.301192
	8.2	-1.31304		8.2	-6.88842			8.2	7.9322		8.2	-8.2255			8.2	21.9026		9.5	-0.254596			8.2	9.80732		8.2	0.49924
	8.3	-0.997164		8.3	-2.89631			8.3	7.09143		8.3	-8.29467			8.3	21.9172		9.6	-0.162514			8.3	9.48596		8.3	1.28984
	8.4	-0.619588		8.4	-5.37808			8.4	7.22309		8.4	-8.37621			8.4	23.4446		9.7	0.880961			8.4	9.51216		8.4	0.173237
	8.5	0.0311305		8.5	-2.82822			8.5	7.72954		8.5	-7.78711			8.5	21.6769		9.8	-0.323026			8.5	10.1117		8.5	-0.0424767
	8.6	1.33457		8.6	-5.55446			8.6	6.72248		8.6	-6.16275			8.6	20.49		9.9	0.0914213			8.6	11.114		8.6	0.488669
	8.7	0.665914		8.7	-2.37435			8.7	7.34872		8.7	-8.02782			8.7	20.6672		10	1.12806			8.7	9.36323		8.7	1.37554
	8.8	0.197333		8.8	-5.21407			8.8	8.18859		8.8	-7.60495			8.8	19.3239		10.1	-0.293389			8.8	11.3652		8.8	0.214516
	8.9	-0.248833		8.9	-2.33882			8.9	7.30189		8.9	-6.81397			8.9	20.5359		10.2	0.654687			8.9	10.2996		8.9	-0.12821
	9	-0.305983		9	-6.52999			9	7.38976		9	-7.86151			9	21.7745		10.3	1.72905			9	10.6832		9	0.762072
	9.1	-0.301524		9.1	-2.92403			9.1	7.92534		9.1	-7.7883			9.1	20.5005		10.4	0.2009			9.1	9.58014		9.1	0.242797
	9.2	-0.15781		9.2	-5.43425			9.2	8.52524		9.2	-7.66564			9.2	20.365		10.5	-0.229882			9.2	10.269		9.2	0.164343
	9.3	0.837201		9.3	-3.29344			9.3	8.12162		9.3	-6.86349			9.3	22.7325		10.6	0.837479			9.3	10.5959		9.3	0.537169
	9.4	0.413863		9.4	-5.42416			9.4	7.72085		9.4	-8.7902			9.4	21.934		10.7	-0.405175			9.4	9.7464		9.4	1.66903
	9.5	0.157747		9.5	-3.49167			9.5	6.17063		9.5	-6.93099			9.5	19.0899		10.8	-0.38962			9.5	10.9482		9.5	1.02259
	9.6	-0.141195		9.6	-5.8215			9.6	7.9185		9.6	-6.18905			9.6	20.486		10.9	1.21962			9.6	10.0053		9.6	0.185642
	9.7	-0.491646		9.7	-3.08107			9.7	8.40334		9.7	-7.82617			9.7	21.5897		11	0.509258			9.7	11.4854		9.7	-0.244032
	9.8	-0.446009		9.8	-5.63222			9.8	8.98566		9.8	-8.9157			9.8	20.0046		11.1	-1.14284			9.8	10.2028		9.8	0.450099
	9.9	-0.395341		9.9	-2.88331			9.9	8.12894		9.9	-7.92656			9.9	20.6169		11.2	0.72113			9.9	10.2095		9.9	0.57759
	10	0.26757		10	-5.98066			10	7.38672		10	-7.47501			10	21.4829		11.3	1.26244			10	9.88589		10	0.0711222
	10.1	-0.166457		10.1	-3.49266			10.1	7.8771		10.1	-8.10475			10.1	20.3673		11.4	0.14933			10.1	10.2103		10.1	0.312448
	10.2	-0.512845		10.2	-5.92683			10.2	9.04269		10.2	-8.22844			10.2	19.6757		11.5	0.675472			10.2	10.7133		10.2	1.38151
	10.3	-0.330386		10.3	-2.88331			10.3	8.01387		10.3	-7.45789			10.3	21.1851		11.6	1.06733			10.3	9.4318		10.3	1.28411
	10.4	-0.239129		10.4	-6.50554			10.4	7.48204		10.4	-7.27138			10.4	19.3013		11.7	0.336197			10.4	11.3205		10.4	0.363036
	10.5	-0.389182		10.5	-2.42256			10.5	8.3322		10.5	-9.02386			10.5	20.5834		11.8	0.350745			10.5	10.3063		10.5	-0.0856078
	10.6	-0.00591275		10.6	-6.09686			10.6	7.76528		10.6	-7.50805			10.6	21.7259		11.9	1.38354			10.6	11.4702		10.6	1.03979
	10.7	0.888156		10.7	-3.51799			10.7	7.81045		10.7	-8.00753			10.7	20.5126		12	0.349099			10.7	10.3785		10.7	0.500818
	10.8	0.701543		10.8	-6.00261			10.8	8.31982		10.8	-8.28311			10.8	20.846		12.1	0.424521			10.8	10.0951		10.8	0.567159
	10.9	0.643445		10.9	-2.69845			10.9	7.93986		10.9	-8.6387			10.9	22.4717		12.2	1.12121			10.9	9.95894		10.9	0.871714
	11	0.400381		11	-6.03445			11	8.15453		11	-7.87078			11	20.309		12.3	0.30122			11	10.1005		11	1.64663
	11.1	0.478657		11.1	-3.6086			11.1	8.52323		11.1	-8.03772			11.1	20.746		12.4	0.374458			11.1	11.4137		11.1	0.385853
	11.2	0.0133698		11.2	-5.98524			11.2	7.82049		11.2	-8.04366			11.2	22.2444		12.5	0.772558			11.2	9.87932		11.2	-0.18716
	11.3	-0.470018		11.3	-3.03306			11.3	8.15919		11.3	-8.04929			11.3	20.8903		12.6	-0.893792			11.3	11.3351		11.3	0.395245
	11.4	0.37143		11.4	-6.49451			11.4	8.42303		11.4	-6.40552			11.4	20.2304		12.7	-0.910174			11.4	10.1085		11.4	1.31456
	11.5	0.257293		11.5	-3.93644			11.5	9.12679		11.5	-8.64869			11.5	21.046		12.8	-0.160229			11.5	9.58549		11.5	0.390278
	11.6	0.174451		11.6	-6.00527			11.6	8.38825		11.6	-8.49299			11.6	18.82		12.9	-1.70577			11.6	9.48371		11.6	0.378858
	11.7	-0.0655507		11.7	-3.64048			11.7	7.65787		11.7	-8.90097			11.7	19.2228		13	-1.88906			11.7	9.44015		11.7	0.905461
	11.8	0.0579864		11.8	-7.06355			11.8	8.09867		11.8	-7.15752			11.8	20.536		13.1	-1.60204			11.8	8.9817		11.8	1.7899
	11.9	0.0768571		11.9	-3.66555			11.9	9.29764		11.9	-8.66501			11.9	20.6094		13.2	-2.81809			11.9	6.10888		11.9	0.417555
	12	-0.374268		12	-6.11335			12	7.99845		12	-7.73093			12	21.275		13.3	-2.43375			12	7.11886		12	0.115225
	12.1	-0.317907		12.1	-2.96918			12.1	7.82843		12.1	-7.75629			12.1	23.3813		13.4	-1.22623			12.1	5.16632		12.1	0.143692
	12.2	0.404302		12.2	-5.6305			12.2	8.69814		12.2	-8.83187			12.2	21.4545		13.5	-2.75021			12.2	6.16824		12.2	0.987602
	12.3	0.135922		12.3	-3.26254			12.3	7.92666		12.3	-7.58704			12.3	21.1836		13.6	-4.11125			12.3	4.39553		12.3	0.239153
	12.4	-0.449841		12.4	-6.39891			12.4	7.84907		12.4	-9.3663			12.4	20.7224		13.7	-1.94755			12.4	4.18882		12.4	0.495472
	12.5	-0.503893		12.5	-2.96721			12.5	8.53138		12.5	-8.8829			12.5	18.8443		13.8	-1.84089			12.5	4.06242		12.5	0.956686
	12.6	-0.319035		12.6	-6.26877			12.6	7.89257		12.6	-7.2873			12.6	19.3268		13.9	-3.36311			12.6	4.40155		12.6	1.71235
	12.7	-0.0103529		12.7	-3.75413			12.7	8.49697		12.7	-8.86531			12.7	21.6149		14	-2.15197			12.7	4.83501		12.7	0.636307
	12.8	0.125842		12.8	-6.29852			12.8	9.22956		12.8	-9.22701			12.8	20.4375		14.1	-1.80968			12.8	2.78443		12.8	0.148653
	12.9	0.788932		12.9	-3.59471			12.9	8.18798		12.9	-9.67531			12.9	20.4953		14.2	-3.01223			12.9	3.46475		12.9	0.428751
	13	1.44848		13	-5.80948			13	8.27677		13	-8.73949			13	21.8361		14.3	-3.12998			13	1.94666		13	1.18331
	13.1	0.708006		13.1	-4.39147			13.1	8.88564		13.1	-10.0577			13.1	20.714		14.4	-2.19991			13.1	1.79503		13.1	1.65801
	13.2	0.431999		13.2	-6.52114			13.2	9.41991		13.2	-7.56383			13.2	20.6759		14.5	-3.29914			13.2	1.28436		13.2	-0.0429125
	13.3	0.314639		13.3	-4.24687			13.3	8.96693		13.3	-8.99359			13.3	21.9464		14.6	-3.27736			13.3	1.8276		13.3	-1.13225
	13.4	0.0543698		13.4	-7.21663			13.4	8.79545		13.4	-8.99977			13.4	20.3954		14.7	-2.42102			13.4	2.35433		13.4	-1.68555
	13.5	0.415689		13.5	-3.98997			13.5	7.52399		13.5	-8.45306			13.5	20.1377		14.8	-3.17563			13.5	1.13339		13.5	-1.97479
	13.6	0.819154		13.6	-6.47178			13.6	8.98426		13.6	-8.59671			13.6	21.4253		14.9	-2.91577			13.6	2.93791		13.6	-3.29447
	13.7	1.9268		13.7	-3.01303			13.7	9.16873		13.7	-9.8375			13.7	20.3673		15	-1.97595			13.7	2.35428		13.7	-3.3046
	13.8	1.67396		13.8	-6.16698			13.8	9.56175		13.8	-7.69884			13.8	21.0342		15.1	-3.15173			13.8	3.29568		13.8	-2.6921
	13.9	2.05886		13.9	-3.91038			13.9	8.56503		13.9	-8.80858			13.9	21.6271		15.2	-2.83482			13.9	1.37252		13.9	-2.25019
	14	2.2276		14	-5.5039			14	7.9969		14	-7.40053			14	19.9896		15.3	-2.33285			14	1.01883		14	-3.45684
	14.1	2.61673		14.1	-2.27084			14.1	8.35058		14.1	-7.77443			14.1	19.9254		15.4	-3.36178			14.1	0.9631		14.1	-3.76754
	14.2	2.63403		14.2	-5.62878			14.2	9.11452		14.2	-7.81135			14.2	21.3205		15.5	-3.23313			14.2	1.36091		14.2	-3.61598
	14.3	2.70093		14.3	-2.22454			14.3	8.2146		14.3	-6.75827			14.3	19.6389		15.6	-2.26487			14.3	2.06514		14.3	-3.1952
	14.4	3.05976		14.4	-5.12877			14.4	8.39156		14.4	-7.04612			14.4	20.4277		15.7	-3.48521			14.4	0.578218		14.4	-4.26949
	14.5	2.46368		14.5	-2.43837			14.5	9.29554		14.5	-7.68307			14.5	21.7929		15.8	-3.12902			14.5	1.44395		14.5	-4.34098
	14.6	2.19186		14.6	-4.36447			14.6	8.38217		14.6	-6.70787			14.6	19.8655		15.9	-2.01689			14.6	0.470738		14.6	-3.94428
	14.7	2.28829		14.7	-0.986131			14.7	9.019		14.7	-7.33128			14.7	19.2086		16	-2.99459			14.7	1.68875		14.7	-3.59336
	14.8	2.5104		14.8	-4.37581			14.8	9.88404		14.8	-6.08661			14.8	21.581		16.1	-2.58763			14.8	0.738737		14.8	-4.68338
	14.9	2.77945		14.9	-1.57228			14.9	8.87867		14.9	-6.29673			14.9	20.1844		16.2	-1.61285			14.9	0.267247		14.9	-5.08858
	15	2.99357		15	-3.78727			15	8.72376		15	-6.29475			15	19.7109		16.3	-2.81801			15	0.843728		15	-4.76919
	15.1	3.35629		15.1	-1.52817			15.1	9.53212		15.1	-6.00032			15.1	20.551		16.4	-3.08255			15.1	0.811781		15.1	-4.12515
	15.2	2.55784		15.2	-3.31102			15.2	8.70267		15.2	-4.42691			15.2	19.5671		16.5	-1.78678			15.2	1.68316		15.2	-4.64573
	15.3	2.3707		15.3	-0.697243			15.3	8.81268		15.3	-4.9752			15.3	19.4186		16.6	-2.78602			15.3	0.118784		15.3	-4.85142
	15.4	2.39208		15.4	-3.01574			15.4	9.5985		15.4	-5.14603			15.4	20.8794		16.7	-4.8553			15.4	1.65409		15.4	-4.26444
	15.5	2.86178		15.5	-1.07326			15.5	8.79975		15.5	-4.01363			15.5	19.4395		16.8	-2.62927			15.5	0.943246		15.5	-5.23598
	15.6	3.4546		15.6	-3.76937			15.6	8.81796		15.6	-3.68814			15.6	18.7227		16.9	-1.90148			15.6	0.571174		15.6	-5.12727
	15.7	4.06615		15.7	-0.151664			15.7	8.91872		15.7	-4.10087			15.7	19.4911		17	-2.70901			15.7	0.29541		15.7	-4.92947
	15.8	5.11589		15.8	-3.42857			15.8	9.63754		15.8	-2.16283			15.8	17.8569		17.1	-3.04652			15.8	0.701174		15.8	-4.20315
	15.9	4.17316		15.9	-0.159102			15.9	9.26535		15.9	-3.23398			15.9	18.8021		17.2	-2.56447			15.9	1.45699		15.9	-5.10835
	16	3.57985		16	-3.37661			16	8.83866		16	-3.83813			16	20.0778		17.3	-3.32773			16	-0.0352369		16	-5.53602
	16.1	3.29993		16.1	0.202451			16.1	8.82009		16.1	-3.73069			16.1	18.1969		17.4	-2.81481			16.1	1.59223		16.1	-5.40621
	16.2	3.36636		16.2	-2.31739			16.2	9.34596		16.2	-2.27233			16.2	18.1125		17.5	-2.20867			16.2	0.408293		16.2	-4.74542
	16.3	3.7495		16.3	0.781267			16.3	8.35404		16.3	-1.99422			16.3	19.2747		17.6	-3.67121			16.3	1.6846		16.3	-5.56439
	16.4	3.82339		16.4	-2.30485			16.4	8.74202		16.4	-1.45424			16.4	16.667		17.7	-3.20752			16.4	-0.112208		16.4	-5.90315
	16.5	4.65846		16.5	0.903397			16.5	9.74854		16.5	-2.04976			16.5	14.687		17.8	-2.27448			16.5	-0.296181		16.5	-5.24866
	16.6	4.02716		16.6	-1.77654			16.6	8.89852		16.6	-3.43523			16.6	16.4812		17.9	-3.10709			16.6	-0.344894		16.6	-3.56539
	16.7	3.33281		16.7	1.25574			16.7	8.87785		16.7	-0.74796			16.7	16.3841		18	-2.97684			16.7	0.392168		16.7	-4.57786
	16.8	2.86099		16.8	-2.22158			16.8	9.6732		16.8	-1.84019			16.8	17.9304		18.1	-1.68862			16.8	0.962202		16.8	-5.38255
	16.9	2.86677		16.9	1.12654			16.9	8.67918		16.9	0.42976			16.9	18.4715		18.2	-2.68812			16.9	0.0581811		16.9	-6.15212
	17	3.21915		17	-2.28015			17	9.07592		17	-1.46058			17	15.6241		18.3	-2.12983			17	1.25737		17	-5.14091
	17.1	3.6913		17.1	0.792034			17.1	9.973		17.1	-1.44759			17.1	14.0389		18.4	-1.87075			17.1	0.192334		17.1	-5.448
	17.2	4.31068		17.2	-1.76458			17.2	9.15174		17.2	-2.02559			17.2	14.4849		18.5	-3.40249			17.2	0.0749533		17.2	-5.08708
	17.3	4.0658		17.3	1.01382			17.3	8.87997		17.3	-1.7196			17.3	12.8655		18.6	-3.28021			17.3	0.0906032		17.3	-5.30583
	17.4	4.06548		17.4	-1.76292			17.4	9.22424		17.4	-2.01862			17.4	14.3776		18.7	-2.45705			17.4	0.758953		17.4	-4.92403
	17.5	3.93764		17.5	1.24508			17.5	9.80761		17.5	-0.857144			17.5	17.0438		18.8	-3.9461			17.5	1.56228		17.5	-5.63264
	17.6	3.80724		17.6	-1.0977			17.6	9.55094		17.6	-1.03177			17.6	14.6265		18.9	-3.67362			17.6	-0.130157		17.6	-5.8995
	17.7	3.88023		17.7	1.14865			17.7	9.11979		17.7	0.0773315			17.7	13.3675		19	-2.43094			17.7	0.964959		17.7	-5.84513
	17.8	3.95911		17.8	-2.66542			17.8	9.40515		17.8	-1.93456			17.8	14.68		19.1	-3.92349			17.8	0.0174936		17.8	-5.33318
	17.9	4.10082		17.9	1.53652			17.9	9.9067		17.9	0.239284			17.9	13.7071		19.2	-4.61288			17.9	1.29738		17.9	-4.89062
	18	4.03224		18	-1.52011			18	9.04175		18	-1.66659			18	14.201		19.3	-2.30298			18	-0.468624		18	-6.02834
	18.1	4.15759		18.1	0.88358			18.1	9.29119		18.1	-1.5212			18.1	15.1118		19.4	-2.49707			18.1	-0.572615		18.1	-6.26398
	18.2	4.02049		18.2	-1.65025			18.2	10.056		18.2	-1.0893			18.2	13.6119		19.5	-4.57769			18.2	-0.385062		18.2	-5.7495
	18.3	4.1288		18.3	0.86371			18.3	8.93693		18.3	-0.778544			18.3	13.9126		19.6	-3.3467			18.3	0.618671		18.3	-5.26224
	18.4	3.99299		18.4	-1.8296			18.4	9.04715		18.4	-1.12115			18.4	15.354		19.7	-2.69422			18.4	1.10119		18.4	-5.83969
	18.5	3.83804		18.5	1.04311			18.5	9.86111		18.5	-0.380794			18.5	12.1704		19.8	-3.35531			18.5	-0.644198		18.5	-6.0979
	18.6	3.44826		18.6	-0.828424			18.6	8.95688		18.6	-1.30481			18.6	11.4451		19.9	-3.06178			18.6	0.377304		18.6	-5.61672
	18.7	2.96969		18.7	2.73685			18.7	9.05822		18.7	0.445131			18.7	12.4666		20	-2.28517			18.7	-0.536049		18.7	-4.54921
	18.8	2.72019		18.8	-1.55616			18.8	10.0072		18.8	-0.538547			18.8	10.1713		20.1	-3.34962			18.8	1.14214		18.8	-5.32618
	18.9	1.92876		18.9	0.860797			18.9	9.27599		18.9	-1.4502			18.9	10.3772		20.2	-3.38541			18.9	0.179982		18.9	-5.85623
	19	1.42432		19	-1.26587			19	9.0209		19	-1.62887			19	12.5324		20.3	-2.27511			19	-0.683489		19	-6.08076
	19.1	1.52887		19.1	0.571753			19.1	9.58701		19.1	-1.2892			19.1	11.0932		20.4	-3.3171			19.1	-0.741013		19.1	-5.01816
	19.2	1.59954		19.2	-0.858228			19.2	8.93124		19.2	-1.1431			19.2	10.2398		20.5	-3.25717			19.2	-0.535484		19.2	-5.85688
	19.3	1.49152		19.3	0.755624			19.3	9.44438		19.3	-0.602409			19.3	12.0736		20.6	-2.68888			19.3	0.60308		19.3	-5.44566
	19.4	1.48227		19.4	-1.62445			19.4	9.74231		19.4	-1.20807			19.4	10.2381		20.7	-3.38017			19.4	-0.892042		19.4	-4.61107
	19.5	1.93822		19.5	1.83456			19.5	9.11464		19.5	0.0257508			19.5	7.71378		20.8	-3.17554			19.5	0.993018		19.5	-3.26942
	19.6	0.915383		19.6	-2.35796			19.6	9.08806		19.6	0.276127			19.6	11.3157		20.9	-2.32752			19.6	-0.698256		19.6	-4.321
	19.7	0.118876		19.7	0.954111			19.7	9.57171		19.7	-0.545837			19.7	12.5051		21	-3.56632			19.7	-0.141269		19.7	-4.75945
	19.8	-0.0781988		19.8	-1.49925			19.8	10.4728		19.8	-0.347199			19.8	9.14483		21.1	-3.07399			19.8	-0.678688		19.8	-3.78048
	19.9	0.174311		19.9	1.33798			19.9	9.84409		19.9	-1.50432			19.9	7.90521		21.2	-2.38074			19.9	-0.2178		19.9	-2.37521
	20	0.47798		20	-1.75272			20	8.91517		20	0.250218			20	8.98515		21.3	-3.36746			20	-0.18008		20	-2.81125
	20.1	0.320504		20.1	1.12612			20.1	9.16662		20.1	0.926076			20.1	9.82849		21.4	-3.24719			20.1	-0.321592		20.1	-2.90036
	20.2	0.872286		20.2	-1.65129			20.2	10.3056		20.2	-0.0113303			20.2	9.03361		21.5	-2.20404			20.2	0.979757		20.2	-1.61786
	20.3	0.569218		20.3	1.34146			20.3	9.24208		20.3	-0.562793			20.3	8.47655		21.6	-3.77169			20.3	-0.366806		20.3	-1.83114
	20.4	0.187465		20.4	-1.59012			20.4	9.0688		20.4	-1.75715			20.4	6.79091		21.7	-3.86885			20.4	0.699173		20.4	-1.68082
	20.5	0.135081		20.5	1.76876			20.5	10.0676		20.5	0.548451			20.5	7.42605		21.8	-2.79938			20.5	-0.0943311		20.5	-1.28716
	20.6	0.316423		20.6	-0.554412			20.6	9.22829		20.6	0.190635			20.6	7.3066		21.9	-3.39418			20.6	-0.198935		20.6	-0.351328
	20.7	0.566548		20.7	0.476671			20.7	9.39492		20.7	0.291419			20.7	9.16203		22	-4.71332			20.7	-0.705607		20.7	-0.819931
	20.8	0.504374		20.8	-0.617453			20.8	10.3769		20.8	-0.0571271			20.8	9.073		22.1	-2.27766			20.8	-0.555129		20.8	-1.57339
	20.9	0.847855		20.9	1.53631			20.9	9.79591		20.9	-0.985105			20.9	6.93561		22.2	-2.02568			20.9	0.498107		20.9	-1.22632
	21	-0.0685545		21	-1.80905			21	9.77173		21	0.131844			21	3.99471		22.3	-3.45268			21	-0.756123		21	-0.5615
	21.1	-0.232185		21.1	1.29574			21.1	10.233		21.1	-1.16251			21.1	6.39183		22.4	-3.30861			21.1	0.735624		21.1	-1.18845
	21.2	-0.315968		21.2	-1.52162			21.2	9.28551		21.2	-0.620157			21.2	7.19635		22.5	-2.3334			21.2	-0.618589		21.2	-1.40184
	21.3	-0.0886713		21.3	1.56637			21.3	9.26383		21.3	0.359243			21.3	8.56213		22.6	-3.15039			21.3	0.14652		21.3	-0.575117
	21.4	-0.150983		21.4	-1.13926			21.4	9.90414		21.4	-0.307741			21.4	6.1467		22.7	-2.51163			21.4	-0.866765		21.4	0.756775
	21.5	0.0471446		21.5	2.0085			21.5	9.21917		21.5	-0.612947			21.5	4.55975		22.8	-1.53291			21.5	-0.521415		21.5	0.158005
	21.6	0.580729		21.6	-1.22581			21.6	9.17392		21.6	0.283575			21.6	4.97928		22.9	-1.79719			21.6	-0.397063		21.6	-0.283036
	21.7	-0.0854694		21.7	1.83092			21.7	9.25868		21.7	1.11528			21.7	8.29918		23	-1.03722			21.7	0.520731		21.7	-0.582634
	21.8	-0.164634		21.8	-1.83974			21.8	10.0946		21.8	1.45401			21.8	6.80799		23.1	0.545182			21.8	3.4604		21.8	0.226894
	21.9	-0.102155		21.9	1.38828			21.9	9.64997		21.9	1.12511			21.9	4.04247		23.2	-0.683008			21.9	3.65501		21.9	-0.00774449
	22	0.227566		22	-1.25401			22	9.23361		22	0.839237			22	4.88978		23.3	-0.438764			22	5.13449		22	0.0984637
	22.1	0.393494		22.1	1.27088			22.1	9.52826		22.1	0.439268			22.1	6.05483		23.4	0.260948			22.1	3.79198		22.1	0.40932
	22.2	0.3809		22.2	-0.846317			22.2	10.5314		22.2	1.21551			22.2	4.9252		23.5	-0.814271			22.2	3.49043		22.2	1.2597
	22.3	1.14574		22.3	0.929769			22.3	9.27937		22.3	0.939387			22.3	4.74798		23.6	-0.237575			22.3	3.06878		22.3	0.621107
	22.4	0.48894		22.4	-1.73067			22.4	9.42249		22.4	1.39815			22.4	5.00504		23.7	1.18575			22.4	3.31785		22.4	0.46717
	22.5	0.167189		22.5	1.19312			22.5	10.3475		22.5	0.420886			22.5	4.51988		23.8	0.203899			22.5	3.86584		22.5	0.319563
	22.6	0.15916		22.6	-1.79839			22.6	9.42586		22.6	1.17637			22.6	5.0586		23.9	0.407593			22.6	2.90592		22.6	0.512413
	22.7	0.147445		22.7	0.591883			22.7	9.21387		22.7	0.29134			22.7	5.69671		24	1.65807			22.7	4.87928		22.7	1.0429
	22.8	0.103279		22.8	-0.877577			22.8	9.86543		22.8	1.47896			22.8	4.40731		24.1	0.111829			22.8	3.71173		22.8	0.325719
	22.9	0.40909		22.9	2.36797			22.9	9.07099		22.9	0.518422			22.9	5.13159		24.2	0.195922			22.9	4.74169		22.9	-0.490201
	23	1.17932		23	-1.47023			23	9.39371		23	-0.12194			23	6.02433		24.3	1.18773			23	3.49126		23	-0.265668
	23.1	1.16651		23.1	1.99086			23.1	10.2238		23.1	0.465177			23.1	4.18293		24.4	0.366195			23.1	3.27904		23.1	0.819283
	23.2	0.858264		23.2	-2.10127			23.2	9.49424		23.2	1.00412			23.2	4.3568		24.5	0.737258			23.2	3.28126		23.2	0.445887
	23.3	0.593899		23.3	1.23083			23.3	9.51702		23.3	0.205372			23.3	5.51655		24.6	2.01755			23.3	3.60386		23.3	0.064684
	23.4	0.260006		23.4	-1.43949			23.4	10.1225		23.4	0.621187			23.4	3.82037		24.7	1.02048			23.4	4.6094		23.4	0.661691
	23.5	0.323741		23.5	2.22971			23.5	9.20088		23.5	0.619761			23.5	4.01419		24.8	1.14035			23.5	3.29422		23.5	0.316101
	23.6	0.182792		23.6	-2.12161			23.6	9.40929		23.6	-0.0942874			23.6	4.91775		24.9	2.04883			23.6	4.86232		23.6	0.651758
	23.7	0.529805		23.7	1.56487			23.7	10.3122		23.7	-0.26036			23.7	3.65516		25	0.930581			23.7	3.49027		23.7	1.0655
	23.8	1.09031		23.8	-1.43668			23.8	9.83904		23.8	-0.164884			23.8	2.9002		25.1	-0.791304			23.8	3.14866		23.8	1.85586
	23.9	2.05486		23.9	0.988285			23.9	9.78225		23.9	0.937724			23.9	4.063		25.2	1.85554			23.9	3.31942		23.9	0.707582
	24	2.49494		24	-1.00278			24	9.80608		24	-1.07733			24	3.1182		25.3	2.1414			24	4.21652		24	0.551077
	24.1	3.02144		24.1	1.96574			24.1	10.585		24.1	-0.101339			24.1	3.95597		25.4	0.751368			24.1	4.88665		24.1	0.854218
	24.2	3.62342		24.2	-2.49408			24.2	9.93207		24.2	-0.481024			24.2	4.34765		25.5	1.32473			24.2	3.59644		24.2	1.38138
	24.3	4.19157		24.3	1.7219			24.3	9.27959		24.3	-0.805325			24.3	2.64064		25.6	2.14283			24.3	4.61972		24.3	1.68995
	24.4	4.37819		24.4	-1.27205			24.4	9.48299		24.4	-0.449806			24.4	3.41011		25.7	1.01431			24.4	3.0488		24.4	0.324924
	24.5	4.25991		24.5	1.76517			24.5	10.0165		24.5	-0.974646			24.5	4.31734		25.8	1.33552			24.5	4.51712		24.5	-0.105142
	24.6	4.5413		24.6	-1.7303			24.6	8.83575		24.6	-0.691863			24.6	2.43337		25.9	2.45886			24.6	3.79288		24.6	0.37206
	24.7	4.237		24.7	1.56617			24.7	9.20219		24.7	-1.18184			24.7	2.46258		26	1.18112			24.7	3.37714		24.7	1.49931
	24.8	4.0191		24.8	-1.76359			24.8	9.68405		24.8	-1.22312			24.8	3.83757		26.1	1.22647			24.8	3.11967		24.8	0.762775
	24.9	4.11333		24.9	1.22495			24.9	7.93902		24.9	-2.60946			24.9	2.28093		26.2	2.46798			24.9	4.07003		24.9	0.348429
	25	4.52956		25	-1.43928			25	7.51129		25	-2.23596			25	2.34605		26.3	1.22163			25	4.89924		25	0.910599
	25.1	4.90828		25.1	1.53756			25.1	8.14787		25.1	-1.29356			25.1	3.58128		26.4	1.28107			25.1	3.48537		25.1	0.755317
	25.2	5.27778		25.2	-1.16829			25.2	6.61609		25.2	-3.33421			25.2	2.34675		26.5	1.82787			25.2	5.06471		25.2	0.733578
	25.3	6.06172		25.3	0.868132			25.3	5.98671		25.3	-4.64876			25.3	2.07816		26.6	0.303685			25.3	4.39058		25.3	1.05575
	25.4	5.50195		25.4	-2.38147			25.4	6.09119		25.4	-6.02473			25.4	3.21869		26.7	0.584479			25.4	4.34701		25.4	1.67031
	25.5	4.63766		25.5	1.04337			25.5	4.7918		25.5	-6.03756			25.5	2.1778		26.8	2.3338			25.5	3.53574		25.5	1.14354
	25.6	4.40728		25.6	-1.37078			25.6	4.37452		25.6	-6.467			25.6	2.43982		26.9	1.92792			25.6	3.59335		25.6	0.364233
	25.7	4.2788		25.7	0.462627			25.7	4.43742		25.7	-4.40813			25.7	3.53474		27	1.75234			25.7	4.05438		25.7	0.30284
	25.8	4.20234		25.8	-1.58778			25.8	3.18001		25.8	-5.31567			25.8	2.46888		27.1	1.96223			25.8	3.4148		25.8	0.719742
	25.9	4.59665		25.9	0.840304			25.9	3.12776		25.9	-5.96063			25.9	2.56289		27.2	0.571999			25.9	4.80711		25.9	-0.180915
	26	5.23168		26	-1.62029			26	3.25475		26	-5.48245			26	2.9347		27.3	0.0766581			26	3.7909		26	-2.54537
	26.1	4.98161		26.1	1.40846			26.1	2.24892		26.1	-5.13716			26.1	1.36311		27.4	1.86827			26.1	5.13938		26.1	-4.21275
	26.2	4.97175		26.2	-1.85472			26.2	2.17686		26.2	-5.596			26.2	1.9011		27.5	1.53743			26.2	3.94486		26.2	-4.35612
	26.3	4.78879		26.3	1.3244			26.3	2.34902		26.3	-7.40568			26.3	3.37054		27.6	0.0868659			26.3	3.19844		26.3	-4.99293
	26.4	5.33757		26.4	-1.94138			26.4	2.50704		26.4	-5.13082			26.4	1.46791		27.7	1.5637			26.4	2.86849		26.4	-6.32185
	26.5	5.19036		26.5	0.25691			26.5	1.44613		26.5	-6.01213			26.5	1.54096		27.8	2.11342			26.5	3.40233		26.5	-7.16945
	26.6	5.33414		26.6	-2.38074			26.6	0.631735		26.6	-5.55044			26.6	2.70562		27.9	0.926887			26.6	4.31886		26.6	-6.43151
	26.7	6.01642		26.7	0.930393			26.7	0.719866		26.7	-5.56494			26.7	0.476076		28	1.07045			26.7	3.0839		26.7	-7.21519
	26.8	5.33048		26.8	-2.07708			26.8	1.56679		26.8	-6.64536			26.8	0.634261		28.1	2.14933			26.8	4.40124		26.8	-7.50162
	26.9	5.14166		26.9	0.911199			26.9	0.103645		26.9	-6.16647			26.9	2.20169		28.2	1.36342			26.9	3.72312		26.9	-7.5884
	27	5.02808		27	-2.38516			27	0.303246		27	-5.61097			27	1.23944		28.3	1.43909			27	4.92302		27	-7.27566
	27.1	5.24785		27.1	2.00642			27.1	1.33127		27.1	-7.22519			27.1	1.48648		28.4	2.11568			27.1	3.84412		27.1	-8.31518
	27.2	5.45857		27.2	-1.57722			27.2	0.41364		27.2	-7.2625			27.2	3.68738		28.5	1.05358			27.2	3.17891		27.2	-9.04471
	27.3	5.44315		27.3	1.28503			27.3	0.073386		27.3	-8.31995			27.3	1.50152		28.6	1.35095			27.3	3.16543		27.3	-8.88821
	27.4	5.9193		27.4	-1.09864			27.4	0.713076		27.4	-6.27582			27.4	0.42896		28.7	2.73503			27.4	3.32672		27.4	-8.17825
	27.5	4.96577		27.5	0.58252			27.5	-0.0740872		27.5	-8.04311			27.5	1.74396		28.8	1.72422			27.5	4.25555		27.5	-7.88694
	27.6	4.78001		27.6	-0.943376			27.6	-0.315841		27.6	-8.02908			27.6	1.37038		28.9	1.26576			27.6	2.93494		27.6	-9.44738
	27.7	4.41272		27.7	1.10657			27.7	0.171614		27.7	-6.56723			27.7	2.13981		29	1.94293			27.7	4.35035		27.7	-10.026
	27.8	4.64555		27.8	-1.62893			27.8	-0.553724		27.8	-6.76532			27.8	2.15347		29.1	0.782954			27.8	3.20447		27.8	-9.50539
	27.9	5.08343		27.9	0.815909			27.9	-0.138989		27.9	-7.03867			27.9	-0.413704		29.2	0.863828			27.9	2.29927		27.9	-9.02482
	28	5.64239		28	-1.93779			28	0.731798		28	-7.64544			28	-0.0495491		29.3	1.37829			28	2.31914		28	-9.44128
	28.1	6.47026		28.1	1.08472			28.1	-0.583465		28.1	-6.35465			28.1	2.76438		29.4	0.778858			28.1	3.18525		28.1	-9.42255
	28.2	5.89498		28.2	-2.05404			28.2	-0.650071		28.2	-8.823			28.2	0.771973		29.5	1.5713			28.2	4.42097		28.2	-8.80634
	28.3	5.99343		28.3	0.597916			28.3	0.13631		28.3	-8.67008			28.3	-0.238243		29.6	2.61279			28.3	2.88355		28.3	-9.7025
	28.4	5.7475		28.4	-1.52214			28.4	-0.182923		28.4	-8.26076			28.4	0.758054		29.7	0.788684			28.4	4.56771		28.4	-9.91878
	28.5	5.25061		28.5	0.936947			28.5	-0.39189		28.5	-7.44458			28.5	-0.654099		29.8	0.264216			28.5	3.26391		28.5	-9.83123
	28.6	5.27687		28.6	-2.17008			28.6	-0.128313		28.6	-8.00215			28.6	-0.915289		29.9	1.02572			28.6	4.7012		28.6	-9.15435
	28.7	5.79455		28.7	0.993382			28.7	0.693039		28.7	-7.31765			28.7	0.11447		30	-0.453706			28.7	2.93645		28.7	-9.88457
	28.8	6.49174		28.8	-1.69779			28.8	-0.0998601		28.8	-7.26005			28.8	-0.570496		30.1	-0.28138			28.8	2.67042		28.8	-10.22
	28.9	5.78077		28.9	0.707927			28.9	-0.87583		28.9	-7.28992			28.9	-0.181524		30.2	0.589121			28.9	2.86219		28.9	-10.4032
	29	5.50965		29	-1.84395			29	-0.654684		29	-7.95223			29	1.32873		30.3	-0.459932			29	3.70674		29	-9.81609
	29.1	5.61491		29.1	0.774766			29.1	0.107869		29.1	-7.20633			29.1	-0.285694		30.4	-2.8841			29.1	4.57746		29.1	-9.01731
	29.2	5.27926		29.2	-1.57239			29.2	-0.66776		29.2	-7.80747			29.2	0.740998		30.5	-0.81298			29.2	3.14618		29.2	-9.77904
	29.3	5.25845		29.3	1.19213			29.3	-0.858516		29.3	-8.76984			29.3	1.67781		30.6	-0.111971			29.3	4.14201		29.3	-10.6475
	29.4	5.59649		29.4	-2.59166			29.4	-0.107496		29.4	-7.26607			29.4	-0.180796		30.7	-0.763444			29.4	2.64237		29.4	-10.6465
	29.5	6.58227		29.5	0.656433			29.5	-0.879996		29.5	-8.45441			29.5	0.00427997		30.8	-0.752932			29.5	2.48566		29.5	-10.0497
	29.6	6.28723		29.6	-1.84676			29.6	-0.565768		29.6	-6.44046			29.6	2.50465		30.9	-0.646682			29.6	2.08995		29.6	-10.5717
	29.7	5.95661		29.7	1.00873			29.7	-0.0777465		29.7	-8.12298			29.7	0.96722		31	-1.5784			29.7	2.37987		29.7	-11.0618
	29.8	5.55468		29.8	-1.60157			29.8	-1.19421		29.8	-7.75399			29.8	0.834028		31.1	-0.932239			29.8	3.0958		29.8	-10.8228
	29.9	5.54536		29.9	-0.0559571			29.9	-1.16644		29.9	-7.33175			29.9	1.88918		31.2	-0.0136397			29.9	2.53401		29.9	-10.1621
	30	5.85142		30	-1.93373			30	-0.239652		30	-7.34269			30	0.50341		31.3	-1.0175			30	4.12646		30	-10.5239
	30.1	6.18694		30.1	0.923735			30.1	-0.518167		30.1	-7.80707			30.1	-0.556958		31.4	-0.904177			30.1	2.58647		30.1	-10.776
	30.2	6.56556		30.2	-1.53525			30.2	-0.690113		30.2	-9.40917			30.2	0.730241		31.5	-0.0556014			30.2	3.43408		30.2	-10.9656
	30.3	6.11332		30.3	0.719422			30.3	-0.402832		30.3	-7.82229			30.3	-0.107186		31.6	-1.4925			30.3	2.36451		30.3	-10.4205
	30.4	6.0586		30.4	-1.77613			30.4	-0.800234		30.4	-6.90215			30.4	0.797191		31.7	-1.15481			30.4	2.10298		30.4	-11.1247
	30.5	5.57558		30.5	0.853255			30.5	-0.762717		30.5	-7.21742			30.5	1.94627		31.8	-0.314313			30.5	2.08323		30.5	-11.0626
	30.6	5.28543		30.6	-1.74107			30.6	-0.609191		30.6	-7.49759			30.6	0.739905		31.9	-1.37768			30.6	2.68539		30.6	-10.8946
	30.7	5.44322		30.7	0.513705			30.7	0.0444951		30.7	-8.92672			30.7	-0.0320647		32	-1.21712			30.7	3.63708		30.7	-10.1578
	30.8	5.95944		30.8	-2.12145			30.8	-0.382834		30.8	-8.42961			30.8	0.548046		32.1	-0.14896			30.8	2.39429		30.8	-11.1913
	30.9	6.2281		30.9	0.823763			30.9	-1.22987		30.9	-8.69979			30.9	-1.06123		32.2	-1.41438			30.9	3.69022		30.9	-11.636
	31	6.49367		31	-2.00561			31	-1.2213		31	-8.52421			31	0.13158		32.3	-1.42322			31	2.40137		31	-11.0329
	31.1	6.46553		31.1	1.10303			31.1	-0.259094		31.1	-8.54743			31.1	1.52006		32.4	-0.3819			31.1	3.68432		31.1	-10.34
	31.2	6.28595		31.2	-2.19952			31.2	-1.02163		31.2	-8.1538			31.2	-0.836899		32.5	-1.55736			31.2	2.46723		31.2	-11.193
	31.3	6.41397		31.3	0.682596			31.3	-0.872924		31.3	-8.92268			31.3	-1.67853		32.6	-1.34996			31.3	1.86494		31.3	-11.7641
	31.4	6.29498		31.4	-2.20098			31.4	-0.0967822		31.4	-8.97901			31.4	0.179895		32.7	-0.212376			31.4	1.66836		31.4	-11.1404
	31.5	6.3044		31.5	1.30022			31.5	-1.07493		31.5	-8.63538			31.5	-1.6305		32.8	-1.49172			31.5	2.35767		31.5	-10.0794
	31.6	6.2909		31.6	-1.36485			31.6	-0.754386		31.6	-7.89154			31.6	-2.52164		32.9	-1.22301			31.6	3.36231		31.6	-10.8097
	31.7	6.31105		31.7	1.18324			31.7	0.0777362		31.7	-8.23731			31.7	-0.663482		33	-0.339922			31.7	2.20963		31.7	-11.546
	31.8	6.52038		31.8	-2.46901			31.8	-0.639249		31.8	-7.27756			31.8	0.0763877		33.1	-1.06313			31.8	3.50053		31.8	-11.5093
	31.9	5.66419		31.9	0.231735			31.9	-0.821719		31.9	-8.29372			31.9	-2.10585		33.2	-3.25641			31.9	2.30646		31.9	-10.8933
	32	5.52004		32	-1.79392			32	-0.0916313		32	-8.55606			32	-0.788755		33.3	-1.26958			32	2.12421		32	-11.5093
	32.1	5.67938		32.1	0.612012			32.1	-0.960561		32.1	-8.02393			32.1	-0.0929178		33.4	-1.06127			32.1	2.23468		32.1	-11.2616
	32.2	5.49803		32.2	-1.88983			32.2	-2.46322		32.2	-8.30355			32.2	-0.660668		33.5	-2.10902			32.2	2.78179		32.2	-10.7054
	32.3	5.49106		32.3	0.738824			32.3	-0.649673		32.3	-8.07147			32.3	-0.277585		33.6	-1.55152			32.3	3.00048		32.3	-10.1691
	32.4	5.87942		32.4	-2.07115			32.4	-0.32905		32.4	-7.64156			32.4	0.30851		33.7	-0.577666			32.4	1.36997		32.4	-11.6992
	32.5	6.35842		32.5	0.884256			32.5	-1.10349		32.5	-6.14056			32.5	-0.843808		33.8	-1.3531			32.5	2.90541		32.5	-12.1563
	32.6	5.79347		32.6	-2.76336			32.6	-1.37986		32.6	-8.98907			32.6	-1.85008		33.9	-1.86884			32.6	2.01148		32.6	-11.9039
	32.7	5.25241		32.7	0.962278			32.7	-0.676747		32.7	-6.95484			32.7	-1.29754		34	-1.48534			32.7	3.908		32.7	-10.8123
	32.8	5.11842		32.8	-1.68417			32.8	-1.39752		32.8	-9.94946			32.8	-2.02004		34.1	-2.0819			32.8	2.69596		32.8	-11.5622
	32.9	5.09889		32.9	0.702049			32.9	-1.14088		32.9	-7.9371			32.9	-0.747852		34.2	-1.60362			32.9	1.80654		32.9	-11.668
	33	5.01935		33	-1.72541			33	-0.585123		33	-7.19666			33	0.406521		34.3	-0.249909			33	1.37054		33	-11.0434
	33.1	5.31733		33.1	0.722231			33.1	-1.30423		33.1	-8.64148			33.1	1.05126		34.4	-1.74963			33.1	2.02973		33.1	-11.3894
	33.2	6.13745		33.2	-1.30264			33.2	-1.10261		33.2	-8.33778			33.2	0.232378		34.5	-1.82422			33.2	3.19039		33.2	-11.2959
	33.3	5.4685		33.3	0.92051			33.3	-0.60156		33.3	-8.09929			33.3	-0.319496		34.6	-1.27865			33.3	1.66462		33.3	-11.2332
	33.4	5.20106		33.4	-2.01503			33.4	-0.21761		33.4	-9.82395			33.4	-3.09191		34.7	-1.77536			33.4	3.38557		33.4	-10.6285
	33.5	4.23898		33.5	0.946309			33.5	2.14507		33.5	-7.66152			33.5	-1.1129		34.8	-1.55173			33.5	2.16469		33.5	-11.308
	33.6	4.07975		33.6	-2.17539			33.6	4.42447		33.6	-8.92616			33.6	-0.628782		34.9	-0.370815			33.6	2.71368		33.6	-11.7243
	33.7	3.9716		33.7	0.596668			33.7	5.82756		33.7	-9.30204			33.7	-0.690527		35	-1.21635			33.7	1.65434		33.7	-11.9083
	33.8	4.26114		33.8	-2.65897			33.8	5.53315		33.8	-9.45425			33.8	-1.6491		35.1	-1.11529			33.8	1.56508		33.8	-11.4152
	33.9	5.03073		33.9	1.11192			33.9	5.78859		33.9	-7.17115			33.9	-1.41084		35.2	-0.177669			33.9	1.87571		33.9	-12.0185
	34	4.59715		34	-1.60172			34	5.7505		34	-9.29784			34	-2.96098		35.3	-1.62542			34	1.36632		34	-12.1677
	34.1	4.51305		34.1	0.552404			34.1	7.37373		34.1	-9.11165			34.1	-1.26229		35.4	-1.64233			34.1	2.72939		34.1	-11.797
	34.2	4.39883						34.2	6.93315		34.2	-8.10198			34.2	-0.375486		35.5	-1.43663			34.2	1.69085		34.2	-10.7405
	34.3	4.19545						34.3	7.49997		34.3	-9.09263			34.3	-1.1844		35.6	-2.51119			34.3	3.57466		34.3	-11.5342
	34.4	3.63138						34.4	7.6899		34.4	-9.29467			34.4	-0.632054		35.7	-1.97397			34.4	2.25886		34.4	-12.2219
	34.5	3.67975						34.5	6.82617		34.5	-10.0221			34.5	-0.127643		35.8	-0.52821			34.5	1.83336		34.5	-12.5571
	34.6	3.8378						34.6	7.09128		34.6	-6.33896			34.6	-2.23335		35.9	-1.72796			34.6	1.44221		34.6	-11.7123
	34.7	3.21014						34.7	7.82376		34.7	-7.73212			34.7	-1.31408		36	-3.57535			34.7	1.84086		34.7	-11.4949
	34.8	3.24871						34.8	7.04553		34.8	-8.79234			34.8	0.431241		36.1	-1.03065			34.8	2.34416		34.8	-11.9316
	34.9	3.49076						34.9	7.76209		34.9	-9.34087			34.9	-1.51977		36.2	-1.10898			34.9	1.40926		34.9	-11.6297
	35	3.86318						35	8.98559		35	-7.45877			35	-2.06649		36.3	-2.48798			35	3.27846		35	-10.022
	35.1	3.93106						35.1	7.74218		35.1	-8.902			35.1	-0.747213		36.4	-1.99999			35.1	2.47393		35.1	-8.56142
	35.2	3.40411						35.2	7.35379		35.2	-7.44926			35.2	-2.00409		36.5	-0.851662			35.2	3.51173		35.2	-8.08594
	35.3	3.77055						35.3	8.25693		35.3	-9.35331			35.3	-2.50224		36.6	-1.48072			35.3	1.85564		35.3	-7.23027
	35.4	2.6855						35.4	7.60063		35.4	-8.20649			35.4	-1.68819		36.7	-1.21863			35.4	0.843724		35.4	-5.82313
	35.5	2.731						35.5	7.72976		35.5	-7.11941			35.5	-2.61032		36.8	-0.279399			35.5	0.886302		35.5	-4.26311
	35.6	2.62174						35.6	8.22583		35.6	-8.36622			35.6	-2.089		36.9	-1.74516			35.6	2.14069		35.6	-4.72723
	35.7	2.88281						35.7	7.43119		35.7	-8.46709			35.7	-0.598771		37	-1.83683			35.7	3.3944		35.7	-4.8928
	35.8	2.77913						35.8	7.75441		35.8	-5.94573			35.8	-2.01911		37.1	-1.1023			35.8	1.64903		35.8	-4.34414
	35.9	2.95334						35.9	8.46326		35.9	-7.06529			35.9	-1.47926		37.2	-1.93456			35.9	2.99751		35.9	-3.06592
	36	2.97978						36	8.8955		36	-7.08835			36	0.208074		37.3	-1.30936			36	1.92941		36	-3.44298
	36.1	2.58556						36.1	8.46217		36.1	-3.38111			36.1	-1.25088		37.4	0.263034			36.1	2.36339		36.1	-3.20069
	36.2	2.56215						36.2	8.27742		36.2	-5.31606			36.2	-2.53615		37.5	-0.587336			36.2	1.43604		36.2	-2.66054
	36.3	2.5258						36.3	8.46646		36.3	-4.68981			36.3	-1.59458		37.6	0.0322943			36.3	2.00539		36.3	-1.12452
	36.4	2.21891						36.4	9.01086		36.4	-5.57856			36.4	-2.65463		37.7	1.13111			36.4	2.42509		36.4	-2.07995
	36.5	1.96918						36.5	7.93987		36.5	-4.51993			36.5	-1.9647		37.8	0.630044			36.5	2.18034		36.5	-2.3053
	36.6	1.82814						36.6	8.40671		36.6	-5.8905			36.6	-1.20209		37.9	0.521527			36.6	3.08084		36.6	-2.43176
	36.7	2.1671						36.7	9.19233		36.7	-4.76801			36.7	-3.07424		38	2.01536			36.7	1.78767		36.7	-1.48734
	36.8	1.82797						36.8	8.29717		36.8	-4.1992			36.8	-2.70001		38.1	0.978442			36.8	3.0779		36.8	-2.46073
	36.9	1.93382						36.9	7.92071		36.9	-3.36598			36.9	-0.862664		38.2	1.26576			36.9	1.64449		36.9	-2.14647
	37	1.3659						37	8.76978		37	-4.71896			37	-1.76961		38.3	2.03261			37	1.37063		37	-1.67106
	37.1	1.2835						37.1	8.19818		37.1	-2.62063			37.1	-1.5807		38.4	0.870283			37.1	1.80467		37.1	-0.643467
	37.2	1.43891						37.2	8.61475		37.2	-2.61231			37.2	-0.108266		38.5	0.193316			37.2	2.64021		37.2	-1.33935
	37.3	1.54638						37.3	9.39365		37.3	-2.96435			37.3	-2.16089		38.6	1.55167			37.3	2.91363		37.3	-1.45344
	37.4	1.91827						37.4	8.30983		37.4	-4.83322			37.4	-2.47469		38.7	0.919979			37.4	0.986164		37.4	-1.14469
	37.5	2.3681						37.5	8.50193		37.5	-2.3655			37.5	-0.573599		38.8	-0.825672			37.5	2.47102		37.5	-0.219912
	37.6	2.82571						37.6	9.15694		37.6	-2.83702			37.6	-0.172001		38.9	1.05458			37.6	1.4217		37.6	-0.764637
	37.7	2.01748						37.7	8.11715		37.7	-2.61683			37.7	-1.64197		39	1.74338			37.7	1.88953		37.7	-0.728384
	37.8	1.33068						37.8	8.23863		37.8	-2.85295			37.8	-1.54491		39.1	0.292953			37.8	0.933772		37.8	-0.0573505
	37.9	1.12506						37.9	9.48187		37.9	-3.09342			37.9	-2.18987		39.2	0.293655			37.9	1.58486		37.9	-0.180487
	38	1.22202						38	8.9403		38	-0.531258			38	-0.95028		39.3	1.07644			38	2.22334		38	-1.03242
	38.1	0.824775						38.1	8.7662		38.1	-2.30972			38.1	1.21898		39.4	0.472165			38.1	1.86067		38.1	-1.00472
	38.2	0.723538						38.2	8.96859		38.2	-1.47405			38.3	0.618653		39.5	0.584106			38.2	2.90783		38.2	-0.404137
	38.3	1.17988						38.3	9.76721		38.3	-1.96863			38.4	1.95453		39.6	1.83813			38.3	1.82651		38.3	-0.184268
	38.4	0.482548						38.4	9.19616		38.4	-1.42303			38.5	1.62057		39.7	0.505596			38.4	3.17873		38.4	-0.958229
	38.5	0.398983						38.5	8.63672		38.5	-1.57143			38.6	0.893621		39.8	0.999843			38.5	2.25646		38.5	-0.842525
	38.6	0.482781						38.6	8.73084		38.6	-1.44648			38.7	-1.94319		39.9	1.61047			38.6	2.03314		38.6	-0.0504742
	38.7	0.91143						38.7	9.52746		38.7	-1.87909			38.8	0.751479		40	0.451731			38.7	1.12457		38.7	1.0996
	38.8	1.47765						38.8	8.93025		38.8	-1.53918			38.9	1.08175		40.1	0.823441			38.8	1.59956		38.8	-0.0991121
	38.9	1.69506						38.9	9.42203		38.9	0.492909			39	0.983452		40.2	2.33252			38.9	2.31994		38.9	-0.529088
	39	2.66093						39	10.0648		39	-0.360273			39.1	1.34527		40.3	1.09743			39	1.14066		39	0.111253
	39.1	2.00051						39.1	8.70975		39.1	-1.48713			39.2	1.66195		40.4	0.940343			39.1	2.22471		39.1	0.734944
	39.2	1.29796						39.2	8.71818		39.2	-0.42152			39.3	0.130529		40.5	1.73983			39.2	1.40658		39.2	-0.112599
	39.3	1.34744						39.3	9.68565		39.3	-1.33841			39.4	0.478561		40.6	0.47748			39.3	2.58731		39.3	-0.419843
	39.4	0.781364						39.4	8.96209		39.4	-2.48832			39.5	1.99881		40.7	0.709626			39.4	1.1673		39.4	0.00492478
	39.5	0.399429						39.5	9.37839		39.5	-1.93495			39.6	1.86849		40.8	2.47974			39.5	1.06575		39.5	1.04898
	39.6	0.553196						39.6	10.0938		39.6	-0.219555			39.7	2.41708		40.9	1.66356			39.6	1.13083		39.6	0.247224
	39.7	1.52979						39.7	8.94394		39.7	-1.79257			39.8	1.86822		41	-0.990327			39.7	1.45555		39.7	-0.139616
	39.8	1.4447						39.8	9.07625		39.8	-1.87172			39.9	-1.00098		41.1	1.13516			39.8	1.86917		39.8	-0.42435
	39.9	0.967607						39.9	10.2075		39.9	-0.298392			40	-1.28446		41.2	1.52332			39.9	0.740445		39.9	0.304527
	40	0.660813						40	9.27125		40	-2.21686			40.1	1.62614		41.3	0.796165			40	2.34229		40	-0.327847
	40.1	1.03715						40.1	9.24308		40.1	-0.429523			40.2	1.84049		41.4	0.799627			40.1	1.19175		40.1	0.154013
	40.2	0.885722						40.2	9.82186		40.2	-1.44751			40.3	1.36927		41.5	1.145			40.2	1.54178		40.2	0.703051
	40.3	0.572787						40.3	9.57889		40.3	0.0805008			40.4	1.39587		41.6	0.30753			40.3	0.69555		40.3	1.25074
	40.4	1.34129						40.4	9.41573		40.4	-1.11869			40.5	-0.251544		41.7	1.14299			40.4	1.02921		40.4	0.044785
	40.5	0.997414						40.5	9.50267		40.5	-0.938278			40.6	0.192412		41.8	2.19193			40.5	1.71278		40.5	-0.249563
	40.6	0.402048						40.6	10.179		40.6	-0.738373			40.7	1.3269		41.9	0.89559			40.6	1.2304		40.6	0.29958
	40.7	-0.0213755						40.7	10.0221		40.7	1.73029			40.8	0.696977		42	0.955311			40.7	1.91735		40.7	1.13169
	40.8	0.219811						40.8	9.5306		40.8	0.460582			40.9	-0.294159		42.1	1.29487			40.8	0.503674		40.8	1.11725
	40.9	0.57541						40.9	9.69467		40.9	-0.958324			41	0.656619		42.2	-0.209837			40.9	2.09868		40.9	0.157691
	41	0.850954						41	10.3249		41	-0.668173			41.1	-0.0127833		42.3	0.636051			41	0.730633		41	0.278403
	41.1	1.27412						41.1	9.30363		41.1	0.579035			41.2	0.822414		42.4	2.36639			41.1	0.729245		41.1	0.931187
	41.2	1.04268						41.2	9.30802		41.2	-0.392045			41.3	1.99909		42.5	0.791968			41.2	0.924552		41.2	1.13247
	41.3	0.524051						41.3	10.2422		41.3	-1.52959			41.4	0.874849		42.6	0.639025			41.3	1.57031		41.3	0.323779
	41.4	0.374832						41.4	9.38947		41.4	-1.17503			41.5	0.559733		42.7	1.62806			41.4	2.11644		41.4	-0.304065
	41.5	0.685652						41.5	9.80419		41.5	0.944062			41.6	1.0213		42.8	0.730929			41.5	1.05163		41.5	0.331681
	41.6	1.07493						41.6	10.635		41.6	0.160051			41.7	0.532406		42.9	0.53085			41.6	2.64381		41.6	-0.030755
	41.7	1.18716						41.7	9.12389		41.7	-1.14214			41.8	1.32147		43	1.56569			41.7	1.23918		41.7	0.6456
	41.8	1.45671						41.8	9.00271		41.8	-1.5708			41.9	1.63005		43.1	0.239972			41.8	2.40153		41.8	0.97115
	41.9	0.519518						41.9	10.1579		41.9	-0.230014			42	-0.689738		43.2	-0.0243934			41.9	1.02799		41.9	1.34333
	42	0.27804						42	10.0474		42	0.216069			42.1	-0.220851		43.3	0.965614			42	0.645781		42	0.160843
	42.1	-0.0890004						42.1	9.57997		42.1	-0.201727			42.2	0.690754		43.4	0.987787			42.1	0.576066		42.1	-0.0606649
	42.2	0.0330403						42.2	9.62843		42.2	-0.0932573			42.3	-1.44012		43.5	-0.674243			42.2	1.22183		42.2	0.212075
	42.3	0.125954						42.3	10.513		42.3	0.16322			42.4	-1.8126		43.9	-0.176929			42.3	2.05518		42.3	0.926948
	42.4	0.178062						42.4	10.1264		42.4	0.0182236			42.5	0.75206		44	1.26615			42.4	1.07537		42.4	0.154957
	42.5	0.790387						42.5	9.26009		42.5	-0.62095			42.6	0.0787804		44.1	1.29487			42.5	2.75235		42.5	0.397103
	42.6	0.262727						42.6	9.3367		42.6	0.542747			42.7	0.314772		44.2	-0.209837			42.6	1.41007		42.6	0.963397
	42.7	0.521531						42.7	10.2266		42.7	0.21179			42.8	1.78793		44.3	0.636051			42.7	0.36623		42.7	1.94202
	42.8	0.447077						42.8	9.26407		42.8	0.535061			42.9	1.35062		44.4	2.36639			42.8	0.0809917		42.8	0.994963
	42.9	0.607679						42.9	9.62214		42.9	-1.40972			43	0.890309		44.5	0.791968			42.9	0.853175		42.9	0.30835
	43	0.512774						43	10.4676		43	-1.06561			43.1	1.56166		44.6	0.639025			43	1.63373		43	-0.00780469
	43.1	0.610039						43.1	9.42253		43.1	0.362333			43.2	0.489406		44.7	1.62806			43.1	0.141832		43.1	0.805496
	43.2	0.703648						43.2	9.37105		43.2	-0.146977			43.3	0.715533		44.8	0.730929			43.2	1.54411		43.2	0.434552
	43.3	0.452986						43.3	10.3077		43.3	-1.21575			43.4	1.63866		44.9	0.53085			43.3	0.538025		43.3	0.558465
	43.4	0.214075						43.4	9.41423		43.4	-1.59607			43.5	-0.232188		45	1.56569			43.4	1.9555		43.4	0.931609
	43.5	0.25509						43.5	9.77431		43.5	-2.04699			43.6	-1.08441		45.1	0.239972			43.5	0.782958		43.5	1.91025
	43.6	-0.23743						43.6	10.6455		43.6	1.56501			43.7	0.399933		45.2	-0.0243934			43.6	0.286358		43.6	0.94783
	43.7	0.0644166						43.7	9.48969		43.7	-0.436574			43.8	0.671774		45.3	0.965614			43.7	0.394525		43.7	0.512009
	43.8	0.367358						43.8	9.51739		43.8	-0.283496			43.9	0.444116		45.4	0.965238			43.8	1.30145		43.8	0.672193
	43.9	0.811734						43.9	10.4293		43.9	0.265431			44	1.01218		45.5	-0.965238			43.9	2.02054		43.9	1.59282
	44	0.972708						44	9.72895		44	-1.10047			44.1	-0.166423		45.8	1.74464			44	0.256234		44	0.51032
	44.1	1.20198						44.1	9.60315		44.1	-0.245702			44.2	-0.64436		45.9	2.34026			44.1	1.42299		44.1	0.288524
	44.2	0.726324						44.2	10.4075		44.2	-0.342762			44.3	-0.964848		46	1.66356			44.2	1.05963		44.2	0.794664
	44.3	0.363824						44.3	9.97693		44.3	-0.0393788			44.4	-1.13894		46.1	-0.990327			44.3	2.35777		44.3	2.2959
	44.4	0.0622255						44.4	9.96768		44.4	1.3514			44.5	0.133746		46.2	1.13516			44.4	1.07594		44.4	1.46124
	44.5	0.518401						44.5	10.3716		44.5	0.97425			44.6	2.07191		46.3	1.52332			44.5	0.307561		44.5	0.668598
	44.6	0.504328						44.6	9.77934		44.6	-0.684098			44.7	1.22743		46.4	0.796165			44.6	0.66398		44.6	0.053403
	44.7	0.997368						44.7	9.79316		44.7	-1.95912			44.8	0.566417		46.5	0.799627			44.7	0.830875		44.7	1.31146
	44.8	1.48653						44.8	10.1318		44.8	-0.243483			44.9	-0.346932		46.6	1.145			44.8	1.47473		44.8	1.31967
	44.9	1.01548						44.9	11.0653		44.9	1.13929			45	-0.87152		46.7	0.30753			44.9	-0.458923		44.9	1.49022
	45	0.445366						45	10.6925		45	0.574598			45.1	-0.498521		46.8	1.14299			45	1.48987		45	1.3005
	45.1	0.114073						45.1	9.89905		45.1	0.0999129			45.2	0.115713		46.9	2.29006			45.1	0.532209		45.1	1.99345
	45.2	-0.495638						45.2	9.73663		45.2	0.409873			45.3	-1.94618		47	0.83904			45.2	0.260346		45.2	1.04036
	45.3	-0.778567						45.3	10.6666		45.3	0.640916			45.4	-2.30834						45.3	-0.0106688		45.3	0.590615
	45.4	-0.746138						45.4	10.0421		45.4	1.75977			45.5	-1.88275						45.4	0.875067		45.4	0.745047
	45.5	0.339703						45.5	10.2292		45.5	-0.278425			45.6	-3.73662						45.5	1.76357		45.5	1.85376
	45.6	0.01932						45.6	10.912		45.6	2.60487			45.7	-3.91068						45.6	0.138318		45.6	1.31666
	45.7	0.308099						45.7	9.97223		45.7	0.199826			45.8	-4.32221						45.7	1.61515		45.7	1.30019
	45.8	0.108866						45.8	10.3695		45.8	0.423422			45.9	-5.6761						45.8	0.234633		45.8	1.70297
	45.9	0.250127						45.9	10.9883		45.9	-1.4067			46	-5.25496						45.9	1.7641		45.9	2.67149
	46	-0.394323						46	10.2665		46	-0.154188			46.1	-3.06484						46	0.504278		46	1.72813
	46.1	-0.265422						46.1	10.434		46.1	-1.99628			46.2	-3.72884						46.1	0.362563		46.1	1.01388
	46.2	0.795996						46.2	11.2938		46.2	-1.55297			46.3	-3.33006						46.2	0.191591		46.2	0.782492
	46.3	0.653534						46.3	10.2133		46.3	1.24436			46.4	-3.43927						46.3	0.933545		46.3	1.63829
	46.4	0.264626						46.4	10.1563		46.4	-0.898028			46.5	-4.97191						46.4	1.81143		46.4	1.31958
	46.5	0.588913						46.5	10.8317		46.5	0.0970605			46.6	-4.5193						46.5	0.29896		46.5	1.52241
	46.6	0.35559						46.6	10.0999		46.6	0.805325			46.7	-3.97129						46.6	1.14645		46.6	1.92199
	46.7	0.397145						46.7	10.0818		46.7	0.496237			46.8	-6.76979						46.7	0.0121635		46.7	2.07314
	46.8	0.148031						46.8	10.3813		46.8	-1.21076			46.9	-6.33563						46.8	0.117343		46.8	2.2106
	46.9	1.00619						46.9	9.75814		46.9	-0.504398			47	-4.30115						46.9	0.259759
	47	0.741292						47	9.98797		47	-0.830838			47.1	-4.68581						47	1.09287
	47.1	0.837709						47.1	10.6469		47.1	-1.40972			47.2	-4.82552						47.1	1.43309
	47.2	0.361397						47.2	9.9481		47.2	-0.359005			47.3	-4.1284						47.2	0.0487597
	47.3	0.558008						47.3	10.1865		47.3	0.858966			47.4	-6.01311						47.3	1.64407
	47.4	0.205092						47.4	10.6954		47.4	-1.08858			47.5	-5.65256						47.4	0.519654
	47.5	0.355558						47.5	10.1692		47.5	0.970368			47.6	-4.48009						47.5	1.60442
	47.6	0.79714						47.6	10.1773		47.6	-0.841693			47.7	-5.68989						47.6	0.244209
	47.7	0.361038						47.7	10.2105		47.7	0.206561			47.8	-5.57243						47.7	-0.00587994
	47.8	0.346797						47.8	10.8389		47.8	-0.0257508			47.9	-4.56036						47.8	-0.48216
	47.9	0.729853						47.9	10.1095						48	-5.87759						47.9	0.49461
	48	1.02056						48	9.2288						48.1	-5.64661						48	1.87784
	48.1	1.06587						48.1	8.68775						48.2	-4.12266						48.1	0.613946
	48.2	1.13485						48.2	8.77852						48.3	-5.50382						48.2	1.92224
	48.3	1.7705						48.3	7.40491						48.4	-6.16573						48.3	0.968714
	48.4	1.05002						48.4	7.50986						48.5	-4.60465						48.4	2.07201
	48.5	0.722688						48.5	7.86709						48.6	-5.95565						48.5	0.687727
	48.6	0.15582						48.6	6.3707						48.7	-5.62323						48.6	0.636699
	48.7	0.157529						48.7	5.42715						48.8	-4.51673						48.7	0.626086
	48.8	0.204262						48.8	5.48531						48.9	-5.59772						48.8	0.537158
	48.9	0.329988						48.9	4.45701						49	-5.07482						48.9	1.60354
	49	1.01763						49	3.93312						49.1	-2.77998						49	0.820822
	49.1	0.54032						49.1	3.83428						49.2	-4.45972						49.1	1.92926
	49.2	0.319207						49.2	2.81023						49.3	-6.41305						49.2	0.305663
	49.3	0.0512749						49.3	2.74633						49.4	-6.35854						49.3	-0.0665802
	49.4	-0.181797						49.4	2.92054						49.5	-6.61171						49.4	0.290273
	49.5	0.410868						49.5	3.47536						49.6	-5.58898						49.5	0.919218
	49.6	0.101702						49.6	3.06002						49.7	-4.30097						49.6	1.76654
	49.7	0.477661						49.7	1.91843						49.8	-6.3924						49.7	0.359823
	49.8	0.108859						49.8	1.47689						49.9	-6.33346						49.8	1.44962
								49.9	1.90406						50	-4.1771						49.9	-0.0223597
								50	1.3276						50.1	-4.6938						50	1.71354
								50.1	1.7244						50.2	-3.49384						50.1	0.521914
								50.2	2.4301						50.3	-3.24234						50.2	0.29001
								50.3	0.883771						50.4	-5.4447						50.3	0.379821
								50.4	0.194192						50.5	-6.01759						50.4	0.690106
								50.5	0.892896						50.6	-3.78624						50.5	0.888998
								50.6	0.159927						50.7	-5.28382						50.6	-0.344704
								50.7	-0.00361266						50.8	-5.02115						50.7	1.34233
								50.8	0.455447						50.9	-3.60485						50.8	0.102577
								50.9	-0.0557838						51	-5.91245						50.9	0.413773
								51	-0.0567106						51.1	-5.74133						51	0.0553433
								51.1	0.486						51.2	-3.71371						51.1	0.303389
								51.2	-0.0774361						51.3	-4.61392						51.2	0.688933
								51.3	0.572326						51.4	-5.74178						51.3	-0.169676
								51.4	0.97681						51.5	-4.25153						51.4	1.30618
								51.5	-0.303874						51.6	-5.18473						51.5	0.26373
								51.6	-0.355983						51.7	-4.4577						51.6	1.52442
								51.7	0.0105797						51.8	-3.08865						51.7	0.155899
								51.8	-0.420622						51.9	-4.22384						51.8	0.0939312
								51.9	-0.170608						52	-3.52146						51.9	0.0344515
								52	0.231697						52.1	-1.59123						52	0.476396
								52.1	0.461302						52.2	-4.02191						52.1	1.02095
								52.2	-0.276733						52.3	-4.68673						52.2	-0.158275
								52.3	-0.78683						52.4	-3.16968						52.3	1.3139
								52.4	-0.581269						52.5	-4.25872						52.4	0.0170237
								52.5	0.383427						52.6	-4.43252						52.5	0.689074
								52.6	-0.559848						52.7	-2.56166						52.6	-0.213758
								52.7	-0.236337						52.8	-2.19474						52.7	-0.353103
								52.8	0.407172						52.9	-0.686934						52.8	-0.287471
								52.9	-0.785014						53	0.579831						52.9	-0.04603
								53	-0.981027						53.1	-1.51922						53	1.30725
								53.1	-0.117426						53.2	-1.50433						53.1	0.0627476
								53.2	-0.742223						53.3	-0.214458						53.2	1.36514
								53.3	-0.760312						53.4	-1.68568						53.3	0.00633731
								53.4	-0.0256109						53.5	-1.08663						53.4	0.583247
								53.5	-0.836768						53.6	0.593507						53.5	0.110796
								53.6	-0.87028						53.7	-0.434916						53.6	0.405581
								53.7	-0.505371						53.8	-0.637328						53.7	0.537073
								53.8	-1.17841						53.9	0.652401						53.8	-0.222128
								53.9	-0.860294						54	-1.18956						53.9	1.18086
								54	-0.531645						54.1	-0.340239						54	0.00227165
								54.1	0.311381						54.2	0.97061						54.1	1.49624
								54.2	-0.295813						54.3	-0.0877824						54.2	0.33564
								54.3	-0.90325						54.4	-0.371259						54.3	-0.0156246
								54.4	-2.03252						54.5	0.707715						54.4	-0.0419764
								54.5	-0.561623						54.6	0.12274						54.5	0.993236
								54.6	-0.426581						54.7	0.450528						54.6	2.17479
								54.7	0.156385						54.8	1.49701						54.7	0.336655
								54.8	-0.371302						54.9	-0.709189						54.8	1.73709
								54.9	-1.37572						55	-0.0954189						54.9	0.363616
								55	-1.30956						55.1	1.9906						55	1.57866
								55.1	-0.363678						55.2	0.904375						55.1	-0.0587943
								55.2	-1.03731						55.3	-2.02418						55.2	-0.341316
								55.3	-1.13041						55.4	0.169582						55.3	-0.446186
								55.4	-0.783508						55.5	2.03068						55.4	0.246555
								55.5	-1.61036						55.6	1.21226						55.5	1.07256
								55.6	-1.48627						55.7	0.826447						55.6	-0.286203
								55.7	-0.984567						55.8	0.992169						55.7	1.03349
								55.8	-0.343123						55.9	1.48543						55.8	0.385994
								55.9	-0.88117						56	2.12209						55.9	-0.0377563
								56	-1.46814													56	-0.507467
								56.1	-2.60498													56.1	0.451255
								56.2	-1.18105													56.2	1.50156
								56.3	-1.05613													56.3	0.153421
								56.4	-0.415448													56.4	1.22307
								56.5	-0.608112													56.5	0.0401667
								56.6	-1.36555													56.6	0.886828
								56.7	-1.50447													56.7	0.0924404
								56.8	-1.13243													56.8	0.21799
								56.9	-1.64529													56.9	0.123643
								57	-1.61386													57	0.466809
								57.1	-0.668034													57.1	1.05588
								57.2	-1.4933													57.2	-0.563051
								57.3	-1.35546													57.3	0.900993
								57.4	-0.932143													57.4	0.239843
								57.5	-1.36272													57.5	0.794035
								57.6	-1.19227													57.6	-0.206405
								57.7	-1.045													57.7	-0.20405
								57.8	-1.61455													57.8	0.345974
								57.9	-1.35981													57.9	0.267191
								58	-1.01501													58	0.980612
								58.1	-0.631698													58.1	-0.573808
								58.2	-1.0441													58.2	0.838951
								58.3	-1.60804													58.3	-0.0867691
								58.4	-1.31763													58.4	-0.0353436
								58.5	-0.866982													58.5	0.00859955
								58.6	-1.82893													58.6	0.741535
								58.7	-1.30169													58.7	1.14115
								58.8	-0.308361													58.8	0.0708857
								58.9	-1.67888													58.9	1.3172
								59	-1.76459													59	0.0150042
								59.1	-0.803794													59.1	1.27031
								59.2	-1.71789													59.2	-0.0105622
								59.3	-1.91858													59.3	-0.565177
								59.4	-1.52657													59.4	-0.816132
								59.5	-1.8817													59.5	-0.158685
								59.6	-2.53224													59.6	0.929562
																						59.7	-0.186517
																						59.8	1.06218
																						59.9	-0.12241
																						60	-0.248182
																						60.1	-0.785543
																						60.2	-0.40322
																						60.3	0.642998
																						60.4	-0.113389
																						60.5	1.00701
																						60.6	-0.285519
																						60.7	0.936898
																						60.8	-0.228527
																						60.9	-0.252406
																						61	-0.542671
																						61.1	0.0929132
																						61.2	0.756826
																						61.3	-0.369426
																						61.4	1.02022
																						61.5	0.284585
																						61.6	1.24989
																						61.7	-0.111605
																						61.8	-0.503158
																						61.9	-0.185441
																						62	0.399929
																						62.1	1.32712
																						62.2	-0.250508
																						62.3	0.897553
																						62.4	-0.321959
																						62.5	0.089961
																						62.6	-0.821859
																						62.7	-0.69303
																						62.8	-0.0531284
																						62.9	-0.167321
																						63	0.691855
																						63.1	-0.838592
																						63.2	0.270125
																						63.3	-0.448082
																						63.4	-0.526258
																						63.5	-0.440456
																						63.6	0.442023
																						63.7	1.24415
																						63.8	-0.520821
																						63.9	0.397878
																						64	-0.5433
																						64.1	0.677397
																						64.2	-0.329356
																						64.3	-0.794433
																						64.4	-0.890091
																						64.5	-0.286662
																						64.6	0.77823
																						64.7	-0.884363
																						64.8	0.449945
																						64.9	-0.144205
																						65	-0.516455
																						65.1	-1.05073
																						65.2	-0.911169
																						65.3	-0.155724
																						65.4	-0.89865
																						65.5	0.809441
																						65.6	-0.265527
																						65.7	1.20498
																						65.8	0.181739
																						65.9	-0.56752
																						66	-0.908926
																						66.1	-0.175372
																						66.2	0.583008
																						66.3	-0.639877
																						66.4	0.664734
																						66.5	-0.328894
																						66.6	0.255478
																						66.7	-1.02073
																						66.8	-1.14905
																						66.9	-0.801012
																						67	-0.442571
																						67.1	0.128251
																						67.2	-1.24078
																						67.3	0.0748336
																						67.4	-0.507107
																						67.5	-1.01844
																						67.6	-1.41588
																						67.7	-0.368844
																						67.8	0.706709
																						67.9	-0.713895
																						68	0.0347019
																						68.1	-0.950187
																						68.2	0.652648
																						68.3	-0.526334
																						68.4	-1.09591
																						68.5	-1.13489
																						68.6	-0.158782
																						68.7	0.753654
																						68.8	-0.767156
																						68.9	0.767803
																						69	-0.130996
																						69.1	0.522183
																						69.2	-0.304216
																						69.3	-0.049343
																						69.4	0.0797754
																						69.5	-0.314564
																						69.6	1.06306
																						69.7	0.0663602
																						69.8	1.02567
																						69.9	-0.35876
																						70	-0.588286
																						70.1	-0.784839
																						70.2	-0.0787212
																						70.3	-0.663306
