# Supplementary material for: Ligand-specific activation trajectories dictate GPCR signalling in cells
Source: Nature. 2026 Jan 14;650(8103):1053–62. doi: 10.1038/s41586-025-09963-3 (PMC12935549; doi:10.1038/s41586-025-09963-3)
Supplement: Supplementary file 6 — Supplementary Data 3: source data for Supplementary Fig. 5. [file 41586_2025_9963_MOESM6_ESM.xlsx]

## Sheet: Supp Fig 5
a)	Time (s)	N419_Ixo_GoA	N419_ACh_GoA	N419_Arec_GoA	N419_Pilo_GoA		N419_Ixo_Gendo	N419_ACh_Gendo	N419_Arec_Gendo	N419_Pilo_Gendo		b)	419_Ixo	419_ACh	419_Arec	419_Pilo
	0	-0.668254	0.288027	5.02882	0.0517242		-0.0297187	0.974595	1.21645	-1.33154			2.02876	102.209	45.3995	-46.0958
	0.1	-0.879164	0.358306	3.53355	0.324651		0.141498	0.609649	0.464034	-0.416727			69.8589	-11.1551	-11.0691	-62.5099
	0.2	-1.14517	0.145877	1.72781	-0.439147		0.513947	0.825347	0.135036	-0.0451586			54.7441	73.2927	46.9492	-51.4087
	0.3	-0.939796	-0.3741	-0.0513548	0.176415		0.61521	0.00453676	-1.31862	0.00402777			116.792	42.4344	-4.52766	-57.9424
	0.4	-0.786143	0.0683505	-2.05001	0.00272092		0.516393	-1.06218	0.257019	0.52288			74.5832	-21.4303	0.155217	-56.1996
	0.5	-0.74939	0.290255	-3.13643	-0.510167		0.294302	0.695743	0.839322	0.243552			-20.6358	99.2293	-5.13846	-51.2076
	0.6	-0.025201	0.16814	-2.38507	-0.111019		-0.0719746	-0.447089	-0.0320784	0.122579			-41.1004	-13.2409	65.339	-57.0501
	0.7	1.07142	0.0795211	-2.20715	-0.298277		-0.531098	-0.992927	0.113407	0.32075			-25.4931	1.31854	-3.32612	-44.2025
	0.8	1.40942	-0.731654	-1.8818	-0.571179		-0.535564	1.62775	1.16701	-0.495093			-22.669	13.5024	-53.4307	-68.2626
	0.9	1.44575	0.154196	-2.07597	-0.338909		-0.549396	1.27861	0.371395	0.434684			-15.937	21.1701	-38.2859	-66.6559
	1	1.46429	-0.150489	-1.73653	-1.17762		-0.511069	1.35392	-0.114719	-0.25709			-35.3704	-7.69335	-56.6877	-60.5973
	1.1	0.895686	-0.636376	-0.4303	-0.393236		-0.617779	0.848326	-0.365274	-0.151756			-25.299	-0.220307	-51.7053	-70.73
	1.2	0.131179	0.0634511	0.38578	-0.396618		-0.560085	1.01818	1.46468	0.148987			-44.0751	-1.33908	-15.6171	-19.2494
	1.3	-0.291498	-0.96541	1.69408	-0.318711		-0.500614	1.8885	0.847607	-0.574344			45.3407	36.9366	15.0879	-89.1907
	1.4	0.22495	-1.78577	5.98544	0.710321		-0.694598	0.405919	-0.512824	0.109717			10.4479	38.0691	24.358	-31.4703
	1.5	0.865242	-2.12189	6.76235	0.388871		-0.686268	0.64923	0.921836	-0.524277			-67.9121	-65.1671	58.2525	-69.075
	1.6	0.840458	-2.7561	5.40884	0.82558		-0.66524	1.79346	0.678541	-0.320429			38.0272	-52.6658
	1.7	1.22964	-1.933	4.98939	1.25492		-0.59202	0.935344	-0.298049	0.0649721			13.2706	-51.0415
	1.8	1.50855	-1.15918	4.68464	0.967601		-0.871263	-0.955053	0.0979644	-0.642234			-8.33345	-64.0298
	1.9	0.837653	-0.635239	4.9053	0.582609		-0.969325	0.488709	1.27743	-0.0335978			-35.8627	-71.0769
	2	0.928667	0.0195848	4.14708	0.122079		-1.00546	0.648595	0.863807	-0.66843			-45.1983	26.2684
	2.1	0.985621	-0.598057	4.01271	-0.63723		-0.963064	-0.356115	-0.353219	-0.539843			-56.5263	-57.6091
	2.2	0.362376	-1.72485	6.27442	-1.777		-0.835789	0.0879176	-0.672406	-0.048713				26.6182
	2.3	0.487925	-1.95482	2.82109	-1.50504		-0.0567282	1.85735	0.564515	-0.715644				45.2747
	2.4	0.415177	-2.1623	1.48396	-0.652907		0.170367	1.69484	0.309029	0.286515				-86.6637
	2.5	0.746015	-1.84605	0.594592	0.235402		0.54271	1.37739	-0.284333	-0.307768				-1.80407
	2.6	0.657411	-0.61798	-2.15583	0.484208		0.621189	0.358626	1.18128	-0.0491626				-9.91314
	2.7	0.802667	-0.719691	-2.17088	0.108037		0.512976	1.90818	1.00027	0.341871				-32.0587
	2.8	1.67253	-0.508969	-2.06927	0.160203		0.11884	1.23965	0.167621	-0.467738				-10.7451
	2.9	1.49204	0.272434	-1.34275	-0.275167		-0.0649172	0.506347	-0.880375	0.169452				2.12045
	3	0.76953	-0.523036	-2.13057	-1.55104		-0.108496	1.65337	-0.141068	-0.296762				-6.57269
	3.1	0.778677	-0.65518	-3.78479	-0.825622		0.219166	1.37552	0.292983	0.215565				-15.7179
	3.2	0.88415	0.105332	-1.3046	-0.546419		0.0938852	1.21665	-0.151275	0.631208				-72.7451
	3.3	0.686294	0.544641	-1.05066	0.346561		0.135387	-0.121395	0.277413	-0.164228				-50.4
	3.4	0.718842	0.957366	-3.76766	0.40569		0.00579674	0.552758	1.69459	0.620837				-63.3231
	3.5	1.12086	1.29871	-3.77862	-0.408763		-0.142989	0.267379	0.963438	0.0922959
	3.6	2.22883	1.28371	-5.22819	-1.06437		-0.193489	-0.413025	0.183616	0.178986
	3.7	2.53	1.58669	-4.10646	-1.74143		0.0698962	0.12621	0.283787	0.382798
	3.8	1.86299	1.12905	-3.35345	-2.01643		0.235831	1.92664	0.12919	-0.270226
	3.9	1.49004	1.10482	-2.03348	-0.888236		0.594441	1.30034	-0.260509	0.702863
	4	1.37576	0.35113	0.430765	-0.655893		0.431913	1.02346	-1.79402	0.170316
	4.1	0.67765	-0.489866	0.239263	0.200601		-0.0768754	1.45684	-0.09622	0.330056
	4.2	0.273262	-1.13497	-0.286017	0.282292		-0.204603	1.69042	0.224675	0.613676
	4.3	0.134216	-2.29511	-0.947991	0.254417		-0.449446	0.892458	-0.184192	-0.184958
	4.4	0.395084	-2.80637	-1.17401	-0.13863		-0.496223	-0.959973	0.385887	0.780091
	4.5	-0.431995	-2.59102	1.60736	-0.72974		-0.248786	0.700621	1.7812	0.0850608
	4.6	-1.52548	-1.55529	3.79312	-0.925319		0.157879	0.973992	1.32696	0.129301
	4.7	-1.88755	-1.49313	3.82458	-0.673612		0.422068	0.0959742	0.865212	0.528796
	4.8	-2.13153	-1.58724	2.56102	-1.40129		0.331942	0.0692864	0.461347	-0.0441633
	4.9	-2.93489	-0.950712	1.86673	-1.44354		-0.0962608	2.10378	1.21795	0.668771
	5	-2.92179	-0.422451	1.18976	-0.599494		-0.341128	1.43088	0.997226	0.358458
	5.1	-3.22984	-0.531896	-1.19043	-0.0909186		-1.24322	0.873551	-0.0693805	0.351994
	5.2	-3.87597	0.234084	-2.42944	0.903518		-2.38338	0.279616	1.0585	0.510183
	5.3	-5.28177	0.122787	-0.66577	0.387983		-3.3144	1.06552	0.847782	-0.621321
	5.4	-5.6696	-2.18839	0.422345	0.336943		-4.04982	-0.408286	-1.01898	-0.0690193
	5.5	-6.26737	-5.26702	1.89454	0.254704		-4.92507	-3.27463	-2.20153	-0.807277
	5.6	-6.89486	-5.48162	2.152	-0.136242		-5.50668	-3.46832	-2.44598	-0.960403
	5.7	-7.31365	-5.64838	2.71628	-0.75353		-6.2629	-5.09592	-3.43779	-0.998702
	5.8	-7.23407	-4.83261	1.22852	0.174629		-6.94471	-7.42346	-4.33401	-1.85175
	5.9	-7.41696	-3.41708	0.451353	-0.626992		-7.69203	-8.38882	-4.55182	-1.31791
	6	-7.71602	-2.89702	-0.113369	-0.662161		-8.3047	-7.58885	-4.18088	-2.02182
	6.1	-7.8339	-3.15117	0.660969	-1.32443		-8.81113	-7.82569	-4.87861	-1.87773
	6.2	-8.14328	-5.63236	-2.10249	-1.41031		-9.06316	-8.19553	-7.43441	-1.58021
	6.3	-8.35453	-6.70755	-2.13705	-1.45342		-9.35698	-8.61425	-7.07228	-2.22081
	6.4	-8.89708	-6.34606	-3.59052	-1.67949		-9.64895	-7.47525	-7.19297	-1.37403
	6.5	-8.86837	-6.76097	-5.53771	-2.83172		-10.1306	-8.5173	-7.72969	-1.7857
	6.6	-9.9721	-6.14007	-6.72867	-1.53505		-10.5473	-9.65865	-7.22763	-1.77097
	6.7	-10.6105	-5.96883	-3.8583	-1.83323		-10.7726	-9.20418	-5.03009	-1.56147
	6.8	-10.7977	-7.18725	-3.01493	-2.28662		-10.8494	-9.24904	-5.01488	-2.4262
	6.9	-11.0761	-7.14972	-2.69411	-1.9098		-10.9571	-9.61594	-5.55714	-1.61377
	7	-10.8649	-7.5698	-5.53887	-1.59467		-11.06	-10.2116	-6.57479	-2.25472
	7.1	-10.9288	-8.03194	-6.34102	-1.97533		-11.3004	-8.86051	-6.40547	-2.05902
	7.2	-11.2741	-8.9501	-9.49578	-2.75617		-11.2418	-8.80859	-8.08619	-1.73937
	7.3	-11.2518	-10.4567	-10.7642	-3.40032		-11.4585	-9.6278	-9.43175	-2.20907
	7.4	-12.5705	-9.96183	-10.8986	-3.10877		-11.3415	-9.52518	-8.38281	-1.5826
	7.5	-12.4781	-10.6577	-7.71135	-3.55079		-11.123	-8.87987	-8.14353	-2.3095
	7.6	-12.3781	-10.7374	-7.34891	-3.37144		-11.0821	-10.0751	-8.4032	-2.42161
	7.7	-12.5186	-9.33995	-5.54443	-2.76625		-11.2321	-10.934	-8.38777	-2.10308
	7.8	-11.8622	-9.31866	-6.08948	-2.13304		-11.4749	-10.7373	-7.1062	-2.90828
	7.9	-12.0148	-9.12076	-6.15226	-2.59738		-12.0961	-10.4662	-7.57234	-2.0703
	8	-12.3521	-9.20923	-7.35099	-2.9509		-12.5817	-11.1552	-8.17348	-2.69243
	8.1	-12.9001	-9.03617	-7.52567	-2.70456		-12.943	-12.3941	-8.94126	-2.58595
	8.2	-13.3185	-7.47523	-9.70158	-3.08653		-12.7699	-11.0366	-8.79766	-2.43634
	8.3	-12.5618	-7.34967	-9.82191	-2.76358		-12.4417	-10.7891	-8.50046	-3.27157
	8.4	-12.8543	-6.35355	-11.1756	-1.94612		-12.1094	-11.6831	-8.69477	-2.86282
	8.5	-13.3032	-6.48654	-10.8481	-1.44165		-11.8881	-11.097	-8.48007	-3.34865
	8.6	-13.8754	-6.90529	-13.1813	-0.35069		-11.8389	-9.58845	-7.73049	-3.3541
	8.7	-13.2071	-6.68586	-13.4875	-0.376559		-12.3581	-9.97701	-7.3233	-2.88519
	8.8	-13.6439	-7.03459	-13.3882	-0.577722		-12.707	-10.7276	-7.57234	-2.95604
	8.9	-13.85	-7.60033	-12.6378	-1.49336		-13.0332	-11.6928	-8.44094	-2.37342
	9	-13.6473	-8.12002	-13.3889	-2.94113		-13.1135	-10.9704	-8.82286	-3.01167
	9.1	-13.1404	-9.78557	-11.0782	-3.60512		-13.073	-11.2853	-7.61601	-3.08931
	9.2	-13.1189	-10.1706	-10.4333	-3.91628		-12.928	-12.3661	-8.39852	-3.24282
	9.3	-13.2705	-10.7395	-8.61743	-3.88205		-12.8799	-11.181	-8.60705	-4.03521
	9.4	-13.2718	-10.5603	-9.1195	-3.07265		-12.7318	-11.3179	-8.85463	-3.59797
	9.5	-12.8362	-10.3711	-8.74627	-2.78437		-12.7674	-11.092	-8.867	-3.87364
	9.6	-12.6862	-9.7353	-8.075	-1.58092		-12.7891	-11.0551	-8.41274	-3.36265
	9.7	-12.9597	-10.1921	-8.07105	-1.62552		-12.9038	-10.4595	-8.69477	-3.56437
	9.8	-13.0532	-10.4555	-8.19269	-2.08616		-12.9373	-9.6078	-8.48007	-4.17285
	9.9	-13.1983	-11.0757	-8.00337	-2.34175		-13.1504	-10.1288	-7.73049	-3.29958
	10	-13.4106	-10.7425	-8.86092	-2.04177		-13.2235	-10.6229	-7.3233	-3.79497
	10.1	-13.6538	-9.6604	-8.61328	-2.54026		-13.3987	-10.1945	-7.84563	-3.57068
	10.2	-13.6188	-9.61179	-9.22353	-2.70622		-13.2666	-11.2967	-8.26829	-3.23528
	10.3	-13.2511	-9.28542	-10.0487	-2.43486		-13.3419	-11.0223	-8.02642	-3.79505
	10.4	-13.1134	-9.10781	-12.4586	-1.71599		-13.2051	-10.2117	-7.35778	-3.25048
	10.5	-13.9159	-10.0195	-14.9029	-2.83791		-13.0391	-10.0808	-8.46135	-4.07427
	10.6	-13.4423	-8.84055	-15.1645	-2.61173		-12.9621	-9.73822	-7.5754	-3.84987
	10.7	-13.7363	-8.17929	-15.8321	-2.35512		-13.084	-10.9711	-7.6568	-3.5705
	10.8	-14.0777	-7.95749	-14.4857	-1.69665		-13.1607	-9.93339	-7.09423	-4.26989
	10.9	-14.3881	-6.88507	-14.8183	-2.05258		-13.3342	-9.79405	-8.41297	-3.74529
	11	-14.3873	-8.32503	-13.6856	-2.15116		-13.427	-10.4423	-7.5308	-4.35072
	11.1	-14.0029	-9.44567	-14.7181	-1.80755		-13.7997	-10.3123	-7.11389	-4.33965
	11.2	-14.1002	-10.7917	-15.376	-2.33298		-13.8205	-9.47833	-8.00533	-4.03435
	11.3	-14.4193	-10.3017	-14.8364	-3.86637		-13.9524	-10.8021	-8.26841	-4.57756
	11.4	-14.0097	-9.2702	-12.5578	-3.26924		-13.7789	-12.031	-7.89135	-3.46034
	11.5	-13.6888	-7.97541	-12.8938	-3.05243		-13.7157	-12.062	-8.73685	-3.95022
	11.6	-13.4303	-7.85719	-11.4968	-2.75088		-13.5952	-11.2695	-9.2064	-3.69673
	11.7	-13.2896	-7.44496	-12.1456	-2.1324		-13.3402	-11.2478	-10.2257	-3.58128
	11.8	-13.2555	-8.02075	-9.60958	-2.06455		-13.3622	-12.1665	-8.42972	-4.18223
	11.9	-13.5203	-8.44206	-9.146	-1.89113		-13.4306	-10.8494	-8.40594	-3.51612
	12	-13.9223	-7.47228	-7.78943	-2.15587		-13.4374	-10.4891	-8.48007	-4.21085
	12.1	-14.4194	-7.09781	-8.21771	-2.48233		-13.7878	-11.1316	-7.73049	-4.12632
	12.2	-14.8899	-8.01273	-7.51867	-2.41119		-13.7331	-10.8075	-7.3233	-3.98197
	12.3	-14.9071	-8.5356	-9.74027	-2.88875		-13.5011	-9.42209	-7.84563	-4.89006
	12.4	-15.6347	-10.5029	-12.1967	-3.5022		-13.4817	-10.0629	-8.26829	-4.14319
	12.5	-15.446	-11.411	-15.3805	-2.6914		-13.424	-10.3634	-8.02642	-4.78158
	12.6	-14.5883	-11.3203	-14.7906	-3.21013		-13.5767	-10.6259	-7.35778	-4.33655
	12.7	-14.4347	-11.8316	-15.5945	-2.70892		-13.6954	-9.60731	-8.46135	-4.05152
	12.8	-14.5782	-10.4492	-16.1341	-2.19329		-13.8497	-10.4058	-7.5754	-4.85246
	12.9	-14.3122	-10.1385	-15.5899	-1.51527		-14.2817	-11.387	-7.6568	-3.99955
	13	-13.8608	-10.1646	-15.3548	-1.17991		-14.173	-10.535	-7.58338	-4.54234
	13.1	-13.4473	-9.91196	-14.5778	-1.54959		-13.8486	-11.0557	-7.37079	-4.34955
	13.2	-13.6192	-10.5343	-14.6236	-1.82896		-13.7465	-11.3981	-7.36306	-3.98459
	13.3	-13.6386	-10.1553	-13.5925	-1.80553		-13.6721	-11.4503	-7.29925	-4.62666
	13.4	-13.6088	-9.64048	-10.2894	-2.10047		-13.8072	-10.4204	-7.79089	-3.56653
	13.5	-14.7955	-10.1519	-8.43859	-1.46404		-13.8662	-10.2876	-7.80902	-4.14146
	13.6	-15.7771	-10.11	-9.11641	-1.7416		-13.9243	-11.097	-7.34185	-4.09963
	13.7	-16.4627	-8.71337	-8.90556	-1.94955		-14.2604	-11.2366	-8.2521	-3.64343
	13.8	-15.711	-9.12819	-10.114	-2.75102		-14.4371	-10.0615	-8.94126	-4.39642
	13.9	-15.0737	-7.47356	-11.4133	-3.10654		-14.5436	-10.4746	-8.79766	-4.12002
	14	-14.4935	-8.15386	-11.9456	-4.3777		-14.3324	-10.9936	-8.50046	-4.77246
	14.1	-14.0922	-8.29231	-11.7376	-4.39584		-14.4756	-10.5756	-8.69477	-4.73616
	14.2	-14.176	-9.30197	-10.4939	-3.30756		-14.763	-10.6283	-8.2126	-4.15562
	14.3	-15.0439	-10.7583	-11.3859	-2.82259		-14.6577	-10.82	-7.84889	-5.06177
	14.4	-15.4259	-12.0419	-14.6539	-2.44852		-14.7002	-11.519	-8.50495	-4.25761
	14.5	-15.7407	-10.9856	-15.1578	-2.33856		-14.754	-10.5356	-7.67428	-4.57719
	14.6	-15.815	-10.8439	-15.3643	-3.26266		-14.8779	-10.2876	-8.2612	-4.67939
	14.7	-16.2062	-9.29678	-15.2429	-3.42747		-15.0073	-11.097	-8.8023	-4.74368
	14.8	-16.2154	-8.98744	-14.3576	-4.20983		-14.6968	-11.2366	-7.09055	-5.38325
	14.9	-15.2333	-8.42104	-12.164	-3.5286		-14.7247	-10.0857	-7.59311	-4.55749
	15	-14.8352	-8.8354	-11.9079	-3.24202		-14.7317	-10.9904	-7.65835	-4.60668
	15.1	-15.1728	-10.064	-11.2826	-3.45438		-14.3936	-9.9534	-8.0948	-5.1515
	15.2	-14.8567	-11.185	-10.17	-2.40836		-14.1916	-10.3815	-7.81175	-4.4778
	15.3	-14.6515	-11.3317	-8.95371	-1.98217		-13.8986	-9.86009	-7.41878	-4.90443
	15.4	-14.3949	-10.9982	-8.88139	-2.42824		-13.863	-10.4943	-8.17465	-4.32161
	15.5	-14.2084	-10.5663	-10.1317	-2.86768		-13.7861	-10.7631	-8.94126	-4.44663
	15.6	-14.1474	-9.76345	-10.3701	-2.91483		-13.9735	-10.4781	-8.79766	-4.79398
	15.7	-13.6952	-8.84669	-9.29317	-3.33676		-14.0816	-11.097	-8.50046	-4.4328
	15.8	-13.5549	-8.42104	-11.5234	-4.17953		-14.4654	-11.2366	-8.69477	-4.96625
	15.9	-14.7035	-8.8354	-12.9746	-4.00534		-14.704	-10.0615	-8.1098	-4.51949
	16	-14.6587	-10.064	-11.911	-3.27765		-14.8978	-10.4746	-7.71658	-4.40341
	16.1	-15.0064	-11.185	-13.2981	-2.60794		-14.8838	-10.9936	-8.52756	-5.0294
	16.2	-14.8217	-11.3317	-14.1458	-3.07022		-14.9085	-10.5756	-9.16898	-4.52797
	16.3	-14.9389	-10.9982	-13.9271	-2.89008		-14.6146	-10.6283	-8.83574	-4.79278
	16.4	-15.3982	-10.5663	-11.2578	-2.25073		-14.689	-10.82	-9.12558	-4.69956
	16.5	-15.2998	-9.76345	-8.23838	-2.2761		-14.5437	-11.519	-8.24042	-5.07398
	16.6	-15.3454	-8.84669	-6.80168	-2.80726		-14.6086	-10.5356	-8.21918	-5.81997
	16.7	-15.6911	-8.42104	-8.0163	-2.61409		-14.613	-10.2876	-7.1062	-5.12517
	16.8	-15.2777	-8.8354	-5.74538	-3.33202		-14.673	-11.097	-7.57234	-5.68977
	16.9	-15.3604	-10.064	-7.56677	-3.24425		-14.6942	-11.3012	-8.17348	-5.55928
	17	-15.5129	-11.185	-9.9568	-4.23256		-14.7233	-10.1963	-8.94126	-5.07796
	17.1	-15.2041	-11.3317	-11.1294	-3.44674		-14.8067	-9.96833	-8.79766	-5.44421
	17.2	-15.3592	-10.9982	-11.9474	-2.51495		-14.8179	-10.2981	-8.50046	-5.01672
	17.3	-14.4217	-10.5663	-11.6011	-2.36101		-14.7325	-11.3756	-8.69477	-5.63518
	17.4	-14.1093	-9.76345	-12.9922	-2.38022		-14.5651	-10.3965	-8.48007	-5.71142
	17.5	-14.1111	-8.84669	-15.2386	-2.46524		-14.6232	-11.0245	-7.73049	-5.33379
	17.6	-14.932	-8.42104	-14.2523	-3.0622		-14.718	-11.7274	-7.85281	-6.08434
	17.7	-15.3772	-8.89178	-14.4699	-3.44844		-14.9298	-12.1665	-7.38203	-5.24243
	17.8	-15.9681	-10.4002	-14.8669	-4.10479		-15.1195	-10.8494	-7.05986	-5.63826
	17.9	-16.2927	-10.8618	-14.7123	-4.17192		-15.2213	-10.4891	-7.22311	-5.16926
	18	-16.2487	-10.2109	-12.164	-3.60029		-15.0563	-11.1316	-7.10226	-5.04944
	18.1	-15.3431	-10.0789	-11.9079	-3.94923		-14.9978	-10.8075	-7.19649	-5.68566
	18.2	-15.1915	-9.76601	-11.2826	-3.36677		-15.0615	-9.42209	-6.6811	-5.20674
	18.3	-15.559	-8.9356	-10.17	-2.51495		-15.0239	-10.0629	-7.06324	-5.66071
	18.4	-16.7308	-8.46538	-8.95371	-2.36101		-15.0847	-10.3634	-7.43691	-5.64044
	18.5	-16.3776	-8.8354	-8.88139	-2.38022		-15.3815	-10.6259	-7.83272	-5.40141
	18.6	-16.8339	-10.064	-10.1317	-2.46524		-15.4464	-9.60731	-8.3071	-5.9327
	18.7	-16.9815	-11.185	-10.3701	-3.0622		-15.3754	-10.4058	-8.19047	-4.92044
	18.8	-16.3442	-11.3317	-9.29317	-3.44844		-15.0381	-11.387	-9.24017	-5.59505
	18.9	-16.014	-10.9982	-11.5234	-4.10479		-15.0462	-10.535	-8.36589	-5.39976
	19	-15.4534	-10.5663	-12.9746	-4.17192		-14.8759	-11.0557	-7.09698	-5.07092
	19.1	-15.2252	-9.76345	-11.911	-3.60029		-14.7977	-11.3981	-7.29065	-5.55887
	19.2	-15.2192	-8.84669	-13.2981	-3.94923		-14.9003	-11.4503	-7.88164	-4.94811
	19.3	-15.2881	-8.42104	-14.1458	-3.36677		-15.1444	-10.4204	-7.36741	-5.83256
	19.4	-15.8262	-8.8354	-13.9271	-2.51495		-15.2175	-10.2876	-7.90635	-5.6318
	19.5	-15.8307	-10.064	-11.2578	-2.36101		-15.4545	-11.097	-7.08338	-5.62995
	19.6	-16.1345	-11.185	-8.7712	-2.38022		-15.2105	-11.2366	-8.41297	-6.47211
	19.7	-16.5132	-11.3317	-6.75625	-2.54771		-15.0658	-10.0615	-7.5308	-5.6278
	19.8	-15.9753	-10.9982	-5.91989	-2.99193		-14.8071	-10.4746	-7.11389	-6.20364
	19.9	-15.7071	-10.5663	-5.45486	-3.43511		-14.9838	-10.9936	-8.03285	-6.04779
	20	-15.2077	-9.76345	-6.40398	-3.84824		-14.9599	-10.5756	-8.72247	-5.93072
	20.1	-16.063	-8.84669	-7.27074	-3.88936		-15.0489	-10.6283	-7.39251	-6.56408
	20.2	-16.4402	-8.42104	-9.5412	-3.15473		-15.1102	-10.82	-7.91834	-5.63406
	20.3	-16.3064	-8.8354	-11.4359	-2.57849		-15.4719	-11.519	-8.47997	-6.17607
	20.4	-16.1451	-10.064	-11.9474	-2.39146		-15.3446	-10.5356	-8.48794	-5.80871
	20.5	-16.6021	-11.185	-11.6011	-2.38022		-15.1398	-10.2876	-7.36053	-5.24349
	20.6	-16.7907	-11.3317	-12.9922	-2.46524		-15.2042	-11.097	-7.05633	-5.92306
	20.7	-16.2967	-10.9982	-15.2386	-3.0622		-15.1368	-11.2366	-8.21979	-5.25692
	20.8	-16.0642	-10.5663	-14.2523	-3.44844		-14.8404	-10.0857	-7.49337	-5.93108
	20.9	-16.0766	-9.76345	-14.4699	-4.10479		-14.748	-10.9904	-7.2114	-5.83789
	21	-16.1498	-8.84669	-14.8669	-4.17192		-14.8725	-9.9534	-7.83624	-5.78654
	21.1	-15.3017	-8.42104	-14.7123	-3.60029		-15.0431	-10.3815	-8.19372	-6.62802
	21.2	-14.7771	-9.07503	-12.164	-3.94923		-15.0489	-9.86009	-7.00983	-6.07682
	21.3	-14.9736	-10.0092	-11.9079	-3.36677		-15.1102	-10.4943	-7.8005	-6.45277
	21.4	-15.8374	-10.4427	-11.2826	-2.51495		-15.4719	-10.7631	-8.83955	-6.44992
	21.5	-15.764	-10.1867	-10.17	-2.36101		-15.3138	-10.4781	-9.60969	-5.99378
	21.6	-16.2218	-10.8676	-8.95371	-2.38022		-15.1328	-11.097	-8.89682	-6.592
	21.7	-15.9597	-11.3183	-8.88139	-2.46524		-15.2618	-11.2366	-9.88397	-5.65151
	21.8	-15.9336	-11.1335	-10.1317	-3.0622		-15.2594	-10.0615	-10.9255	-6.01129
	21.9	-15.7199	-9.42798	-10.3701	-3.44844		-15.0544	-10.4746	-9.31714	-5.87429
	22	-15.3618	-9.2702	-9.29317	-4.10479		-15.1079	-10.9936	-8.84583	-5.67976
	22.1	-15.32	-7.97541	-11.5234	-4.17192		-14.986	-10.5756	-9.09614	-6.25858
	22.2	-15.4956	-7.85719	-12.9746	-3.60029		-14.9355	-10.6283	-9.09423	-5.8373
	22.3	-15.2328	-7.44496	-11.911	-3.94923		-14.748	-10.82	-7.08542	-6.20449
	22.4	-15.2612	-8.02075	-13.2981	-3.36677		-14.8725	-11.519	-6.97142	-6.21037
	22.5	-15.4777	-8.44206	-13.186	-2.51495		-15.0431	-10.5356	-8.24086	-5.91077
	22.6	-16.1051	-7.47228	-14.9314	-2.36101		-15.0796	-10.2876	-8.7979	-6.40091
	22.7	-16.3943	-7.09781	-12.3886	-2.38022		-15.1171	-11.097	-7.93573	-5.97993
	22.8	-15.7937	-8.01273	-10.1523	-2.46524		-15.4144	-11.3807	-8.96649	-6.53739
	22.9	-16.1111	-8.5356	-9.41314	-3.42897		-15.2219	-9.97455	-10.0177	-6.61267
	23	-16.0886	-10.5029	-9.91729	-3.31302		-14.9258	-10.2871	-9.08876	-6.618
	23.1	-15.9622	-11.411	-9.73822	-3.29705		-14.8443	-10.5373	-8.45897	-7.23494
	23.2	-16.0493	-11.3203	-10.2734	-3.17636		-15.0233	-10.0531	-8.91479	-6.68968
	23.3	-16.4109	-11.8316	-9.29317	-2.43942		-14.948	-9.79929	-10.7416	-7.10384
	23.4	-16.0829	-10.4492	-11.7869	-2.35201		-15.0269	-10.8278	-9.31017	-6.82112
	23.5	-15.1829	-10.1385	-12.8352	-1.91749		-15.1655	-10.5421	-8.69332	-6.78484
	23.6	-14.4196	-10.1646	-11.6827	-2.45975		-15.369	-10.5567	-8.4851	-6.83822
	23.7	-14.6781	-9.91196	-12.0668	-2.81885		-15.3263	-10.1138	-7.80819	-6.04326
	23.8	-14.5423	-10.5343	-12.5654	-2.64748		-15.3665	-11.451	-5.20849	-6.56702
	23.9	-14.3691	-10.1553	-12.3983	-2.38306		-15.533	-11.3026	-5.61684	-6.56751
	24	-14.5024	-9.64048	-10.7676	-2.21434		-15.5998	-10.7223	-6.49889	-6.79668
	24.1	-14.7304	-10.3525	-11.5161	-1.91231		-15.4402	-10.8252	-7.40799	-7.11596
	24.2	-14.3617	-9.32712	-13.7095	-1.17433		-15.3785	-10.1624	-6.25892	-6.58592
	24.3	-14.3702	-9.13901	-13.7511	-0.624223		-15.1613	-8.24384	-6.551	-7.14842
	24.4	-14.5253	-8.97766	-11.9029	-1.33204		-14.91	-8.54626	-6.82317	-6.64965
	24.5	-14.729	-8.90141	-11.3519	-1.14464		-14.6663	-8.13051	-4.56147	-6.83761
	24.6	-14.8553	-9.40737	-10.5291	-2.03419		-14.7874	-7.46117	-3.76006	-6.7317
	24.7	-14.8759	-9.4591	-10.259	-1.86684		-14.9884	-6.03907	-4.64602	-6.46426
	24.8	-14.9248	-9.14375	-10.0877	-1.68393		-15.0695	-5.42965	-5.77144	-7.356
	24.9	-15.2659	-8.33952	-11.0728	-2.33821		-15.0705	-5.71629	-4.12199	-7.09059
	25	-15.0669	-8.70552	-8.95968	-2.32659		-14.9452	-4.02922	-3.70637	-7.36902
	25.1	-15.0101	-8.54952	-7.82484	-2.25797		-14.5435	-3.6602	-3.93507	-7.11423
	25.2	-14.4794	-8.16846	-4.15339	-2.1637		-14.3639	-4.2629	-3.50651	-6.703
	25.3	-14.6459	-8.10953	-3.25927	-1.87604		-14.4064	-3.78958	-1.94078	-7.35405
	25.4	-14.6985	-7.1459	-3.02185	-1.08439		-14.5189	-1.7371	-3.08152	-6.11309
	25.5	-14.3496	-5.69118	-4.80176	0.609909		-14.549	-1.69423	-4.41471	-6.52141
	25.6	-14.5067	-3.83817	-5.11505	-0.311251		-14.5953	-1.87868	-3.91073	-6.10655
	25.7	-14.5712	-2.16791	-7.37894	-1.17573		-14.6178	-2.21571	-2.56113	-5.39952
	25.8	-14.6961	-3.33523	-5.66821	-2.5869		-14.3686	-1.41811	-2.12943	-5.84904
	25.9	-14.9955	-4.01303	-7.17287	-2.87349		-14.1926	-1.75438	-3.1471	-4.65131
	26	-15.2898	-4.84021	-4.1563	-3.01923		-14.0984	-3.27826	-1.55442	-4.83104
	26.1	-15.0597	-4.68018	-5.36366	-3.23343		-13.9857	-2.33463	-1.01514	-4.24477
	26.2	-14.572	-4.78939	-5.19658	-2.12768		-13.7639	-1.8605	-2.08347	-3.29177
	26.3	-14.1493	-4.50426	-6.10507	-1.07666		-13.6129	-2.63248	-1.6686	-3.82669
	26.4	-14.5569	-3.00176	-6.26005	-1.05883		-13.6478	-2.85165	-0.233083	-2.54239
	26.5	-14.5688	-2.41222	-9.72708	-0.466245		-13.7069	-1.56187	-0.275625	-2.78507
	26.6	-14.9015	-2.31359	-8.86957	-0.550321		-13.4303	-1.6203	-0.885278	-2.48631
	26.7	-15.1815	-3.09432	-8.59862	-0.811969		-13.1934	-1.92955	-0.896837	-1.93486
	26.8	-15.4328	-3.8641	-6.61736	-0.507043		-12.8301	-2.39271	0.440412	-2.57477
	26.9	-14.5105	-5.09708	-4.83007	-0.955418		-12.6441	-1.05019	0.641467	-1.70912
	27	-13.913	-6.33066	-2.91573	-1.17747		-12.5722	-1.18749	-0.883105	-2.26397
	27.1	-13.4333	-6.54836	-2.35702	-1.82483		-12.6321	-1.68884	0.636179	-2.08167
	27.2	-13.7221	-5.6059	-1.50015	-0.77035		-12.6503	-0.880808	0.453991	-1.69324
	27.3	-13.2831	-4.33529	-2.06827	-0.2511		-12.5345	-0.710766	-0.515828	-2.44838
	27.4	-12.8079	-2.01874	-2.45161	0.00635684		-12.2006	-1.42176	-0.858759	-1.53521
	27.5	-13.0963	-2.09887	-3.57508	-0.359092		-12.0472	-2.08501	1.00786	-1.95898
	27.6	-12.8216	-2.37499	-2.98261	0.35639		-12.0715	-1.27482	0.823611	-1.73188
	27.7	-13.0286	-2.74945	-2.66672	-0.124943		-12.2671	-1.28553	0.417561	-1.41659
	27.8	-13.5665	-2.98319	-2.41477	0.0576765		-12.1373	-1.32829	-0.300921	-2.02193
	27.9	-14.0102	-3.14539	-3.89079	-0.988471		-12.2004	-1.1539	0.858422	-1.07989
	28	-14.1429	-2.96187	-4.03635	-0.790346		-12.1666	-0.436484	0.487419	-1.42199
	28.1	-13.294	-2.4056	-3.65162	-0.465689		-12.1401	-0.809618	-0.14202	-1.35782
	28.2	-12.8223	-1.98353	-5.20073	0.463302		-11.7425	-1.33358	1.06	-1.04349
	28.3	-12.9221	-2.5233	-5.37193	0.511496		-11.5591	-0.906502	0.877722	-1.69501
	28.4	-12.0554	-2.10423	-5.13003	-0.0943926		-11.4224	-0.427757	0.513669	-0.913549
	28.5	-12.8145	-2.90844	-5.59235	-0.650552		-11.4423	-0.660393	-1.36165	-1.47832
	28.6	-13.4101	-2.20494	-3.30264	-0.621624		-11.1345	-1.75001	0.0341088	-1.38067
	28.7	-12.9593	-0.451711	-3.04161	-1.07472		-11.0189	-0.335038	-0.606569	-0.993878
	28.8	-11.8379	0.0576671	-4.32621	-0.531767		-10.8267	-0.234744	-0.886191	-1.6784
	28.9	-11.1158	-0.625794	-4.45611	0.56531		-10.7932	-0.922234	-0.260763	-0.989057
	29	-10.8458	-0.116597	-4.41068	1.66838		-10.6498	-0.71989	1.68595	-1.57789
	29.1	-10.9147	-0.741292	-4.48172	0.794709		-10.7717	0.354136	0.835327	-1.31826
	29.2	-10.8626	-1.66352	-3.6853	-0.412819		-10.8378	0.305436	1.07166	-1.05407
	29.3	-12.1299	-2.2427	-3.39014	-1.02483		-11.3589	-0.332752	0.707208	-1.38318
	29.4	-12.9009	-1.02875	-1.44219	-2.34913		-11.4578	-0.927168	1.86257	-0.446382
	29.5	-13.2936	0.254506	-1.37597	-2.27131		-11.3484	0.27194	0.985478	-0.389276
	29.6	-13.4886	-0.653196	-1.14662	-2.20829		-11.0174	0.0992103	-0.938495	-0.0359539
	29.7	-14.0166	-1.15068	-0.456816	-2.21225		-10.8095	-1.80208	0.522001	0.415603
	29.8	-13.9801	-1.16842	0.0362015	-2.62115		-10.6553	-0.549547	0.681843	-0.416405
	29.9	-14.0088	-1.80946	-0.561547	-3.29097		-10.3794	-0.495198	-0.337745	0.264076
	30	-13.3056	-1.7793	0.356524	-2.73278		-10.1458	-0.812301	0.114731	-0.611771
	30.1	-13.6814	-0.990087	-0.0246777	-2.51984		-10.3103	-0.261435	1.9135	-0.508062
	30.2	-13.5661	-1.31977	-1.39923	-2.48585		-10.199	1.40782	1.75259	-0.158273
	30.3	-13.5788	-1.47785	-3.48274	-2.08727		-10.1718	1.8992	1.43368	-0.593417
	30.4	-12.8955	-1.16216	-4.65688	-2.18169		-10.0356	1.6694	0.403165	0.297329
	30.5	-12.3552	-0.523164	-5.39305	-2.39678		-9.77492	0.620218	1.97859	-0.212057
	30.6	-11.9792	-0.354588	-7.13914	-2.33397		-9.68061	1.68425	1.30343	-0.00569943
	30.7	-11.7639	0.0861807	-6.0042	-1.66433		-9.65586	0.739151	0.562539	0.196694
	30.8	-11.0831	-0.165192	-3.58871	-1.19989		-9.58368	0.166549	1.72951	-0.455404
	30.9	-11.3833	-0.0773819	-1.37452	-1.12615		-9.45962	0.682941	1.45074	0.288043
	31	-11.0075	-1.13922	0.0988162	-1.09342		-9.43861	0.535849	1.29268	-0.0348708
	31.1	-11.4952	-1.84376	0.770317	-1.34891		-9.66127	-0.113879	-0.0618702	-0.106724
	31.2	-11.738	-1.00589	-0.335543	-1.85817		-9.47411	-1.98341	0.625245	0.160898
	31.3	-11.7698	-0.560526	-0.620947	-2.53445		-9.40718	-0.896114	0.338817	-0.617458
	31.4	-11.7182	-0.465164	-1.90635	-1.68608		-9.47872	-0.501128	-0.348404	-0.124577
	31.5	-11.9055	-1.47629	-0.596033	-1.35138		-9.5767	-0.158517	0.201894	-0.991316
	31.6	-11.4421	-1.44583	-0.537162	-1.63986		-9.33751	0.717906	2.03184	-0.770256
	31.7	-10.9371	-1.48296	0.533444	-0.38997		-9.25027	1.72895	1.39956	-0.555038
	31.8	-10.2554	-2.81946	1.37496	-0.586195		-9.2803	1.29713	1.12178	-0.558675
	31.9	-10.7288	-3.55664	2.46192	-0.234537		-9.36401	0.596298	1.56466	0.114391
	32	-11.4691	-3.38859	1.0519	-0.4763		-9.41229	-0.269552	1.8048	0.120852
	32.1	-11.0034	-2.91417	0.378408	-0.515319		-9.30395	0.0153423	0.998294	0.496117
	32.2	-10.4692	-2.17958	0.475075	-0.00926613		-9.02252	-0.741879	-0.878141	0.428841
	32.3	-10.8262	-2.55319	-0.216759	-0.337339		-8.90442	-1.48227	0.864584	0.364489
	32.4	-10.3664	-1.6404	-1.34294	-0.333635		-8.70934	0.326048	0.377944	1.05663
	32.5	-10.2829	-1.15538	-0.43929	0.137118		-8.58137	0.847388	1.33141	0.189515
	32.6	-10.2628	-0.372733	-0.284025	-0.337078		-8.46989	0.323588	0.739773	0.325825
	32.7	-10.3615	-0.449335	0.810453	0.250287		-8.52178	0.508745	1.73736	-0.30595
	32.8	-10.8023	-0.380968	1.04141	-0.138722		-8.62187	1.26693	1.60091	-0.148384
	32.9	-10.3392	0.863687	1.0481	0.101158		-8.28524	0.519168	2.3396	0.18126
	33	-10.4557	1.17942	2.33486	0.599694		-8.04767	0.0496253	1.09915	-0.552196
	33.1	-10.759	0.0768847	1.05692	-0.0553369		-8.03672	0.0611101	1.43368	0.408212
	33.2	-10.7003	-0.310501	-0.469391	0.405414		-7.88873	1.50456	0.403165	0.127923
	33.3	-10.9182	-0.386371	-0.305438	0.233355		-8.00229	1.20244	1.97859	0.234126
	33.4	-11.1405	-0.485101	-1.27677	0.312327		-8.15973	0.0710819	1.30343	0.784117
	33.5	-10.4832	-2.01892	-2.58522	1.79536		-8.24879	1.01448	0.562539	-0.045978
	33.6	-10.1042	-1.81517	-2.3945	1.83895		-8.2591	0.42216	1.72951	0.715072
	33.7	-9.8697	-0.503519	-1.99611	1.74066		-7.93928	-0.496456	1.45074	0.255043
	33.8	-10.0214	-0.306219	0.56129	1.32548		-7.79398	-0.970155	1.29268	0.236236
	33.9	-9.76304	-0.329799	1.32954	0.573036		-7.8328	1.17686	-0.0618702	0.475572
	34	-9.61224	-0.140611	4.43853	0.864318		-7.79165	1.7348	0.625245	-0.397111
	34.1	-9.9138	-1.18205	6.04057	0.69864		-7.8975	1.28965	0.338817	0.442194
	34.2	-10.2804	-2.55272	5.00869	-0.179231		-7.79956	1.23331	-0.348404	-0.0209915
	34.3	-9.88544	-3.31209	3.00272	0.908303		-7.74494	2.41531	0.201894	-0.0336535
	34.4	-9.31746	-2.74194	2.11295	1.02036		-7.93227	1.11399	2.03184	0.55919
	34.5	-9.58003	-1.70963	1.31534	0.658277		-7.5193	0.0672606	1.39956	-0.0931627
	34.6	-9.45771	-1.47352	-1.02235	0.992275		-7.47817	0.657667	1.12178	0.513438
	34.7	-9.68657	-0.177651	-1.1258	0.956213		-7.42033	1.61584	1.56466	-0.244238
	34.8	-9.69387	0.382734	-1.26407	0.879316		-7.41642	1.59241	1.8048	-0.077766
	34.9	-10.0142	-0.0154662	-2.4173	1.07196		-7.27654	-0.0853787	0.998294	0.150367
	35	-10.0883	0.0683505	-1.46132	0.707508		-7.12906	1.81287	-0.878141	-0.678531
	35.1	-9.5749	0.290255	-0.231221	0.485835		-7.26809	2.0278	-0.191396	0.171081
	35.2	-9.14931	0.16814	1.5487	0.618646		-7.3927	1.67683	2.22015	-0.180639
	35.3	-9.31166	0.0795211	3.7608	0.633955		-7.17323	1.42613	2.13018	0.0268974
	35.4	-9.68752	-0.731654	2.6124	0.41621		-7.07454	2.71181	1.92743	0.484608
	35.5	-10.1361	0.154196	3.22223	0.579653		-6.73832	1.71555	1.98571	-0.331376
	35.6	-9.62759	-0.150489	1.92038	0.841447		-6.69365	1.06196	2.42904	0.545913
	35.7	-9.65197	-0.636376	0.452467	1.40328		-6.73672	0.578129	0.856439	-0.101976
	35.8	-9.80858	0.0634511	3.10214	1.59416		-6.83852	1.53579	0.560418	-0.0515916
	35.9	-8.91774	-0.96541	3.25972	1.08224		-6.79794	0.759715	0.739773	0.223496
	36	-8.7673	-1.78577	3.42249	0.574942		-6.69717	-0.451337	1.73736	-0.416377
	36.1	-8.66853	-2.12189	4.00536	0.517516		-6.83369	0.457381	1.60091	0.533607
	36.2	-8.72932	-2.7561	3.40794	0.365644		-6.88384	1.02777	2.3396	0.0236763
	36.3	-8.00609	-1.933	4.42842	0.9291		-6.84535	0.420342	1.09915	0.0875146
	36.4	-7.41746	-1.15918	5.25488	1.40305		-6.93652	0.947839	1.43368	0.755459
	36.5	-7.89244	-0.635239	3.33939	1.90139		-7.07284	2.79042	0.403165	0.134041
	36.6	-7.71343	0.0195848	3.1799	1.7647		-7.00687	2.6286	1.97859	0.863427
	36.7	-7.90971	-0.598057	-1.59811	1.66004		-6.73702	1.86678	1.30343	0.0978076
	36.8	-8.60447	-1.72485	-4.01824	0.754035		-6.77167	1.34982	0.562539	0.278625
	36.9	-8.96965	-1.95482	-5.26714	0.868437		-6.8825	2.66419	1.72951	0.637882
	37	-9.18759	-2.1623	-5.11411	0.0670601		-6.85959	2.00002	1.45074	-0.0257701
	37.1	-9.73916	-1.84605	-2.25957	-0.798216		-6.71424	0.307994	1.29268	0.714389
	37.2	-9.72753	-0.61798	-0.000852434	-1.55082		-6.3249	1.59726	-0.0618702	0.290831
	37.3	-9.41684	-0.719691	-0.375395	-2.00712		-5.92956	1.21502	0.625245	0.5924
	37.4	-8.0537	-0.508969	-0.940234	-1.49018		-5.50531	0.101319	0.338817	0.768595
	37.5	-7.71619	0.272434	-0.103476	-0.821862		-5.5405	-0.341347	-0.348404	0.0297993
	37.6	-7.78175	-0.523036	2.33215	-0.338914		-5.54114	1.19006	0.201894	1.13752
	37.7	-7.44476	-0.65518	5.69458	1.46075		-5.67256	1.74462	2.03184	0.763682
	37.8	-7.60659	0.105332	6.10481	2.55921		-6.00629	2.0487	1.39956	0.981791
	37.9	-8.46498	0.544641	6.90863	3.27542		-6.10802	0.734043	1.12178	1.07815
	38	-8.25136	1.8874	6.6937	2.04458		-5.75352	1.40883	1.56466	0.0596417
	38.1	-7.60861	0.902632	5.0883	1.14965		-5.48441	0.786047	1.8048	0.703899
	38.2	-6.44551	-0.352527	3.55879	0.90714		-5.36892	0.043971	0.998294	-0.0808892
	38.3	-6.42605	-1.04923	4.01885	0.365257		-5.44588	0.430527	-0.878141	0.0200792
	38.4	-6.59085	-2.77814	3.49122	-0.0387932		-5.404	0.271145	0.864584	0.510287
	38.5	-7.0062	-3.59002	3.41752	0.0729958		-5.45594	-1.06218	0.377944	-0.207883
	38.6	-7.22893	-2.76934	1.80126	0.0205399		-5.76287	0.695743	1.33141	0.945125
	38.7	-7.62883	-2.37509	2.09399	0.452016		-5.64114	-0.447089	0.739773	0.356153
	38.8	-7.92187	-1.6404	2.63414	-0.00314885		-5.44158	-0.992927	1.73736	0.443378
	38.9	-7.47733	-1.15538	2.95184	-0.308457		-5.32695	1.62775	1.60091	0.850413
	39	-7.43003	-0.372733	2.23559	-0.481574		-5.38653	1.27861	2.3396	-0.0114552
	39.1	-7.541	-0.449335	0.471651	0.509938		-5.26516	1.35392	1.09915	0.690763
	39.2	-7.18408	-0.380968	-0.956135	0.219025		-5.52057	0.848326	1.43368	0.23762
	39.3	-8.14018	0.863687	-2.79121	-0.135163		-5.16334	1.01818	0.403165	0.236236
	39.4	-8.03307	1.17942	-2.76469	-0.192193		-5.02335	1.8885	1.97859	0.475572
	39.5	-7.59037	0.0768847	0.197229	0.92608		-4.74293	0.405919	1.30343	-0.397111
	39.6	-7.87487	-0.310501	2.46078	0.889865		-4.72239	0.64923	0.562539	0.442194
	39.7	-7.8576	-0.386371	3.31675	0.93383		-4.80229	1.79346	1.72951	-0.0209915
	39.8	-7.89357	-0.485101	4.19899	1.74197		-5.00399	0.935344	1.45074	-0.0336535
	39.9	-7.80386	-2.01892	4.40518	2.07069		-5.2531	-0.955053	1.29268	0.55919
	40	-7.83328	-1.81517	3.99055	2.58851		-5.46804	0.488709	-0.0618702	-0.0931627
	40.1	-8.19388	-0.503519	1.99591	2.46132		-5.28782	0.648595	0.625245	0.513438
	40.2	-7.02383	-0.306219	1.26617	2.08367		-5.25311	-0.356115	0.338817	-0.244238
	40.3	-6.31252	-0.329799	0.513976	1.882		-4.90077	0.0879176	-0.348404	-0.077766
	40.4	-5.93486	-0.140611	-1.8734	0.297455		-4.62286	1.85735	0.201894	0.150367
	40.5	-6.22552	-1.18205	-4.01143	-0.252452		-4.39428	1.69484	2.03184	-0.678531
	40.6	-6.06236	-2.55272	-2.23708	-0.0285333		-4.37198	1.37739	1.39956	0.171081
	40.7	-7.0993	-3.31209	-1.12822	-0.553295		-4.36673	0.358626	1.12178	-0.180639
	40.8	-7.74113	-2.74194	-1.51511	1.17576		-4.27161	1.90818	1.56466	0.0268974
	40.9	-7.57681	-1.70963	0.365438	2.05188		-4.36916	1.23965	1.8048	0.484608
	41	-6.90158	-1.47352	2.07676	3.02166		-4.53634	0.506347	0.998294	-0.331376
	41.1	-6.87943	-0.177651	2.45054	3.03829		-4.35954	1.65337	-0.878141	0.545913
	41.2	-6.73752	0.382734	3.64478	1.95443		-4.26475	1.37552	-0.191396	-0.101976
	41.3	-6.88603	-0.0154662	5.47934	1.16543		-4.23248	1.21665	2.22015	-0.0515916
	41.4	-7.08884	0.0683505	6.11099	0.981944		-4.44242	-0.121395	2.13018	0.223496
	41.5	-7.7749	0.290255	3.37662	-0.0423553		-4.37996	0.552758	1.92743	-0.416377
	41.6	-7.52799	0.16814	-2.09832	0.0630029		-4.09889	0.267379	1.98571	0.533607
	41.7	-6.34789	0.0795211	-4.04029	0.316911		-4.09647	-0.413025	2.42904	0.0236763
	41.8	-5.76121	-0.731654	-5.26714	0.222073		-4.23945	0.12621	0.856439	0.0875146
	41.9	-5.45763	0.154196	-5.11411	-0.811321		-4.04504	1.92664	0.560418	0.755459
	42	-5.61408	-0.150489	-2.25957	-0.76906		-4.1147	1.30034	0.739773	0.134041
	42.1	-5.83859	-0.636376	-0.000852434	-0.0601439		-4.05236	1.02346	1.73736	0.863427
	42.2	-7.05313	0.0634511	-0.375395	0.690417		-4.28883	1.45684	1.60091	0.0978076
	42.3	-7.22842	-0.96541	-0.940234	0.323659		-4.17308	1.69042	2.3396	0.278625
	42.4	-6.9655	-1.78577	-0.103476	0.170432		-3.88252	0.892458	1.09915	0.637882
	42.5	-6.53901	-2.12189	2.33215	0.0368681		-3.93666	-0.959973	1.43368	-0.0257701
	42.6	-6.68094	-2.7561	5.69458	-0.914038		-3.95308	0.700621	0.403165	0.714389
	42.7	-6.81535	-1.933	6.10481	-1.36608		-3.91319	0.973992	1.97859	0.290831
	42.8	-6.72252	-1.15918	6.90863	-0.231543		-4.06504	0.0959742	1.30343	0.5924
	42.9	-6.96048	-0.635239	6.6937	0.565014		-3.99498	0.0692864	0.562539	0.768595
	43	-6.95395	0.0195848	5.0883	1.26327		-4.06966	2.10378	1.72951	0.0297993
	43.1	-6.11252	-0.598057	3.55879	1.26557		-4.02445	1.31902	1.45074	1.13752
	43.2	-5.89266	-1.72485	4.01885	1.0299		-3.77628	0.644072	1.29268	0.763682
	43.3	-6.45131	-1.95482	3.49122	0.911431		-3.78068	0.427331	-0.0618702	0.981791
	43.4	-7.07374	-2.1623	3.41752	-0.231899		-3.57017	1.27496	0.625245	1.07815
	43.5	-7.32257	-1.84605	1.80126	0.0256239		-3.56387	0.881701	0.338817	0.0596417
	43.6	-7.22456	-0.61798	2.09399	1.4164		-3.57933	-0.364729	-0.348404	0.703899
	43.7	-6.97719	-0.719691	2.63414	1.04796		-3.47039	1.6958	0.201894	-0.0808892
	43.8	-6.50412	-0.508969	2.95184	0.47165		-3.59953	2.20162	2.03184	0.0200792
	43.9	-5.57105	0.272434	2.23559	-0.354863		-3.62226	1.67683	1.39956	0.510287
	44	-6.11736	-0.523036	0.471651	0.0616451		-3.67609	1.42613	1.12178	0.156379
	44.1	-6.51491	-0.65518	-0.956135	-0.288389		-3.55168	2.71181	1.56466	0.155735
	44.2	-7.08299	0.105332	-2.79121	-0.49606		-3.25726	1.71555	1.8048	0.487231
	44.3	-7.35863	0.544641	-2.76469	0.00284678		-3.20267	1.06196	0.998294	0.0860867
	44.4	-7.08549	1.01625	0.197229	1.28267		-3.06354	0.578129	-0.878141	0.0831612
	44.5	-6.45462	1.05028	2.46078	0.746483		-2.96122	1.53579	0.276695	0.383824
	44.6	-6.50101	1.62356	3.31675	1.31026		-2.95006	0.759715	1.75571	0.669809
	44.7	-6.13638	2.03041	4.19899	1.76344		-2.88736	-0.451337	1.49522	1.18786
	44.8	-6.17681	0.911129	4.40518	3.44909		-2.99428	0.457381	0.32652	1.07815
	44.9	-5.69002	-0.448273	3.99055	3.18538		-2.83265	1.02777	2.23798	0.0596417
	45	-5.71281	-1.28406	1.99591	3.20385		-2.98411	0.420342	1.30826	0.703899
	45.1	-5.97105	-2.69627	1.26617	2.26547		-3.08006	0.947839	0.894763	-0.0808892
	45.2	-5.70127	-3.31209	0.513976	1.0145		-3.37148	2.79042	-1.84068	0.0200792
	45.3	-5.23011	-2.74194	-1.8734	0.2774		-3.40443	2.6286	0.257019	0.510287
	45.4	-5.31363	-1.70963	-4.01143	0.0575925		-3.17616	1.86678	0.839322	-0.207883
	45.5	-5.40245	-1.47352	-2.23708	0.188972		-3.16252	1.34982	-0.0320784	0.945125
	45.6	-4.52115	-0.177651	-1.12822	0.801264		-3.11459	2.66419	0.113407	0.356153
	45.7	-4.61417	0.382734	-1.51511	0.564709		-3.19759	2.00002	1.16701	0.443378
	45.8	-5.18575	-0.0154662	0.365438	0.807379		-3.02785	0.307994	0.371395	0.850413
	45.9	-6.18133	0.0683505	2.95398	1.59902		-2.83212	1.59726	-0.114719	-0.0114552
	46	-6.66859	0.290255	2.84338	1.81334		-2.71938	1.21502	-0.365274	0.690763
	46.1	-7.13279	0.16814	1.2188	1.89668		-2.52475	0.101319	1.46468	0.23762
	46.2	-7.14844	0.0795211	0.839957	1.58785		-2.43854	-0.341347	0.847607	0.236236
	46.3	-6.71871	-0.731654	0.629221	1.5914		-2.36743	1.19006	-0.512824	0.475572
	46.4	-5.45988	0.154196	-0.862332	1.17899		-2.47599	1.74462	0.921836	-0.397111
	46.5	-4.67704	-0.150489	-0.51243	-0.375777		-2.59613	2.0487	0.678541	0.442194
	46.6	-3.81448	-0.636376	2.05928	-0.245972		-2.52251	0.734043	-0.298049	-0.0209915
	46.7	-3.70238	0.0634511	3.31675	0.00272092		-2.51527	1.40883	0.00934949	-0.0336535
	46.8	-3.76883	-0.96541	4.19899	-0.510167		-2.54446	0.786047	0.992073	0.55919
	46.9	-4.53191	-1.78577	4.40518	-0.111019		-2.49427	0.043971	0.861933	-0.0931627
	47	-5.24199	-2.12189	3.99055	-0.298277		-2.7251	0.430527	1.57592	0.513438
	47.1	-5.0468	-2.7561	1.99591	-0.571179		-2.73612	0.271145	0.338552	-0.244238
	47.2	-4.79889	-1.933	1.26617	-0.338909		-2.85067	-1.06218	1.74489	-0.077766
	47.3	-4.18626	-1.15918	0.513976	-1.17762		-3.00233	0.695743	0.434033	0.150367
	47.4	-3.17762	-0.635239	-1.8734	-0.393236		-2.69385	-0.447089	0.426114	-0.678531
	47.5	-3.1602	0.0195848	-4.01143	-0.396618		-2.4896	-0.992927	0.338817	0.171081
	47.6	-3.18224	-0.598057	-2.23708	-0.318711		-2.17193	1.62775	-0.348404	-0.180639
	47.7	-3.22346	-1.72485	-1.12822	0.710321		-1.96125	1.27861	0.201894	0.0268974
	47.8	-3.95026	-1.95482	-1.51511	0.388871		-2.12177	1.35392	2.03184	0.484608
	47.9	-4.13664	-2.1623	0.365438	0.82558		-2.18867	0.848326	1.39956	-0.331376
	48	-4.41496	-1.84605	2.07676	1.25492		-2.13057	1.01818	1.12178	0.545913
	48.1	-4.73972	-0.61798	2.45054	0.967601		-2.22337	1.8885	1.56466	-0.101976
	48.2	-4.71219	-0.719691	3.64478	0.582609		-1.88982	0.405919	1.8048	-0.0515916
	48.3	-5.15552	-0.508969	5.47934	0.122079		-2.07948	0.64923	0.998294	0.223496
	48.4	-4.97625	0.0376446	6.11099	-0.63723		-2.11947	1.79346	-0.878141	-0.416377
	48.5	-5.19366	-0.157032	3.37662	-1.777		-2.16745	0.935344	0.276695	0.533607
	48.6	-5.85903	-0.123693	-2.09832	-1.50504		-2.15843	-0.955053	1.75571	0.0236763
	48.7	-5.73906	0.220522	-4.04029	-0.652907		-2.34235	0.488709	1.49522	0.0875146
	48.8	-5.00539	0.464263	-5.26714	0.235402		-2.29928	0.648595	0.32652	0.755459
	48.9	-4.17536	0.564207	-5.11411	0.484208		-2.461	-0.356115	2.23798	0.134041
	49	-3.39053	-0.40304	-2.25957	0.108037		-2.48566	0.0879176	1.30826	0.863427
	49.1	-3.04393	-0.907502	-0.000852434	0.160203		-2.61904	1.85735	0.894763	0.0978076
	49.2	-2.5273	-1.72485	-0.375395	-0.275167		-2.59623	1.69484	-1.84068	0.278625
	49.3	-3.53242	-1.95482	-0.940234	-1.55104		-2.40926	1.37739	0.257019	0.637882
	49.4	-3.92271	-2.1623	0.708393	-0.825622		-2.08539	0.358626	0.839322	-0.0257701
	49.5	-4.83613	-1.84605	2.73182	-0.546419		-2.25038	1.90818	-0.0320784	0.714389
	49.6	-4.97785	-0.61798	3.22812	0.346561		-2.12688	1.23965	0.113407	0.290831
	49.7	-5.18291	-0.719691	3.23424	0.40569		-2.56524	0.506347	1.16701	0.5924
	49.8	-4.975	-0.508969	2.40084	-0.408763		-2.50559	1.65337	0.371395	0.768595
	49.9	-5.24212	0.272434	0.847496	-1.06437		-2.33703	1.37552	-0.114719	0.424723
	50	-4.44237	-0.523036	0.472113	-1.74143		-2.09393	1.21665	-0.365274	0.470728
	50.1	-4.39946	-0.65518	1.05884	-2.01643		-1.85586	-0.121395	1.01365	0.688896
	50.2	-3.81668	0.105332	3.31675	-0.888236		-1.38385	0.552758	1.44327	0.335655
	50.3	-4.34502	0.544641	4.19899	-0.655893		-1.39829	0.267379	0.264348	0.336863
	50.4	-3.9001	1.8874	4.40518	-0.0693138		-1.21292	-0.413025	1.4221	-0.719767
	50.5	-4.33622	0.902632	3.99055	0.104116		-1.63449	0.12621	0.607127	0.390895
	50.6	-3.8885	-0.352527	1.99591	0.722845		-1.87686	1.92664	0.530701	0.270449
	50.7	-4.34729	-1.04923	1.26617	0.757152		-1.99238	1.30034	-0.10926	0.0831612
	50.8	-3.55118	-2.77814	0.513976	1.85591		-2.12612	1.02346	-0.17328	0.383824
	50.9	-2.94751	-3.59002	-1.8734	2.52712		-2.24403	1.45684	0.201894	0.669809
	51	-2.23994	-2.76934	-4.01143	3.34801		-2.18271	1.69042	2.03184	1.18786
	51.1	-1.84814	-2.37509	-2.23708	2.51117		-2.22196	0.892458	1.39956	1.07815
	51.2	-1.92426	-1.6404	-1.12822	1.0145		-2.09615	-0.959973	1.12178	0.0596417
	51.3	-3.04613	-1.15538	-1.51511	0.2774		-2.27695	0.700621	1.56466	0.703899
	51.4	-3.63646	-0.372733	0.365438	0.0575925		-2.43253	0.973992	1.8048	-0.0808892
	51.5	-4.23507	-0.449335	2.95398	0.188972		-2.39552	0.0959742	0.998294	0.0200792
	51.6	-4.32978	-0.380968	2.84338	0.801264		-2.48353	0.0692864	-0.878141	0.510287
	51.7	-4.72305	0.863687	1.2188	0.564709		-2.40018	2.10378	0.276695	-0.207883
	51.8	-4.22901	1.17942	0.839957	0.807379		-2.12649	1.31902	1.75571	0.945125
	51.9	-3.97547	0.0768847	0.629221	1.59902		-2.05932	0.644072	1.49522	0.356153
	52	-3.69358	-0.310501	-0.862332	1.81334		-1.70689	0.427331	0.32652	0.443378
	52.1	-3.44935	-0.386371	-0.51243	1.89668		-1.47013	1.27496	2.23798	0.850413
	52.2	-3.08668	-0.485101	2.05928	1.58785		-1.09817	0.881701	1.30826	-0.0114552
	52.3	-2.48058	-2.01892	3.31675	1.5914		-1.09366	-0.364729	0.894763	0.690763
	52.4	-2.42011	-1.81517	4.19899	1.17899		-1.10293	1.6958	-1.84068	0.23762
	52.5	-3.04236	-0.503519	4.40518	-0.375777		-1.24705	2.20162	0.257019	0.236236
	52.6	-3.40177	-0.306219	3.99055	-0.245972		-1.52348	1.67683	0.839322	0.475572
	52.7	-4.2293	-0.329799	1.99591	0.00272092		-1.91876	1.42613	-0.0320784	-0.397111
	52.8	-4.50694	-0.140611	1.26617	-0.510167		-2.14183	2.71181	0.113407	0.442194
	52.9	-4.62115	-1.18205	0.513976	-0.111019		-2.21847	1.71555	1.16701	-0.0209915
	53	-4.4774	-2.55272	-1.8734	-0.298277		-2.08424	1.06196	0.371395	-0.0336535
	53.1	-3.98572	-3.31209	-3.17875	-0.571179		-1.88378	0.578129	-0.114719	0.55919
	53.2	-3.0225	-2.74194	-2.92773	-0.338909		-1.78825	1.53579	-1.28941	-0.0931627
	53.3	-2.45836	-1.70963	-2.82917	-1.17762		-1.49462	0.759715	2.32311	0.513438
	53.4	-2.05216	-1.47352	-2.22108	-0.393236		-1.3749	-0.451337	2.21671	-0.244238
	53.5	-2.0724	-0.177651	-2.13002	-0.396618		-1.23431	0.457381	1.65357	-0.077766
	53.6	-2.01922	0.382734	-1.07222	-0.318711		-1.29912	1.02777	2.62013	0.150367
	53.7	-2.35113	-0.0154662	0.641393	0.710321		-1.32217	0.420342	3.24089	-0.678531
	53.8	-2.51061	0.0683505	2.05008	0.388871		-1.31466	0.947839	2.17364	0.171081
	53.9	-2.24472	0.290255	3.31675	0.82558		-1.52599	2.79042	0.694352	-0.180639
	54	-1.93887	0.16814	4.19899	1.25492		-1.81361	2.6286	0.403165	0.0268974
	54.1	-2.37399	0.0795211	4.40518	0.967601		-1.76697	1.86678	1.97859	0.484608
	54.2	-2.06443	-0.731654	3.99055	0.582609		-1.72729	1.34982	1.30343	-0.331376
	54.3	-2.20214	0.154196	1.99591	0.122079		-1.46873	2.66419	0.562539	0.545913
	54.4	-1.79802	-0.150489	1.26617	-0.63723		-1.25317	2.00002	1.72951	-0.101976
	54.5	-1.85774	-0.636376	0.513976	-1.777		-1.13571	0.307994	1.45074	-0.0515916
	54.6	-1.91298	0.0634511	-1.8734	-1.50504		-1.28565	1.59726	1.29268	0.223496
	54.7	-1.32838	-0.96541	-4.01143	-0.652907		-1.41216	1.21502	-0.0618702	-0.416377
	54.8	-1.41594	-1.78577	-2.23708	0.235402		-1.52138	0.101319	0.625245	0.533607
	54.9	-2.24263	-2.12189	-1.12822	0.484208		-1.51044	-0.341347	0.338817	0.0236763
	55	-2.94218	-2.7561	-1.51511	0.108037		-1.5749	1.19006	-0.348404	0.0875146
	55.1	-3.26147	-1.933	0.365438	0.160203		-1.38167	1.74462	0.201894	0.755459
	55.2	-3.02211	-1.15918	2.95398	-0.275167		-1.22289	2.0487	2.03184	0.134041
	55.3	-2.26612	-0.635239	2.84338	-1.55104		-1.16682	0.734043	1.39956	0.863427
	55.4	-1.96041	0.0195848	1.2188	-0.825622		-1.004	1.40883	1.12178	0.0978076
	55.5	-1.43124	-0.598057	0.839957	-0.546419		-0.776324	0.786047	1.56466	0.278625
	55.6	-1.02008	-1.72485	0.629221	0.346561		-0.807326	0.043971	1.8048	0.637882
	55.7	-0.944875	-1.95482	-0.862332	0.40569		-0.898064	0.430527	0.998294	-0.0257701
	55.8	-1.19829	-2.1623	-0.51243	-0.408763		-0.873215	0.271145	-0.878141	0.714389
	55.9	-1.51606	-1.84605	2.05928	-1.06437		-0.643496	-1.06218	0.709197	0.290831
	56	-1.29846	-0.61798	3.31675	-1.74143		-0.674755	0.695743	1.14256	0.5924
	56.1	-1.81371	-0.719691	4.19899	-2.01643		-0.579445	-0.447089	0.281693	0.768595
	56.2	-2.53957	-0.508969	4.40518	-1.27504		-0.462324	-0.992927	0.455728	0.424723
	56.3	-2.73388	0.272434	3.99055	-0.469452		-0.614902	1.62775	2.81704	0.470728
	56.4	-2.22493	-0.523036	1.99591	1.16388		-0.944665	1.27861	2.42922	0.688896
	56.5	-2.14124	-0.65518	1.26617	1.18385		-1.07433	1.35392	1.30743	0.335655
	56.6	-1.71977	0.105332	0.513976	0.932432		-0.992038	0.848326	1.2033	-0.0273986
	56.7	-1.90172	0.544641	-1.8734	0.465954		-0.884376	1.01818	1.8048	0.0696232
	56.8	-1.78279	1.01625	-3.17875	0.472687		-0.942784	1.8885	0.998294	0.259817
	56.9	-2.26522	1.05028	-2.92773	1.1409		-0.667242	0.405919	-0.878141	0.62774
	57	-1.93761	1.62356	-2.82917	0.956213		-0.515387	0.64923	0.276695	0.850413
	57.1	-1.73829	2.03041	-2.22108	0.879316		-0.520259	1.79346	1.75571	-0.0114552
	57.2	-1.66227	0.911129	-2.13002	1.07196		-0.612088	0.935344	1.49522	0.690763
	57.3	-2.01681	-0.448273	-1.07222	0.707508		-0.647393	-0.955053	0.32652	0.23762
	57.4	-1.92379	-1.28406	0.641393	0.485835		-0.831217	0.488709	2.23798	0.236236
	57.5	-2.0539	-2.69627	2.05008	0.618646		-0.764971	0.648595	1.30826	0.475572
	57.6	-2.21517	-3.31209	3.31675	0.633955		-0.608927	-0.356115	0.894763	-0.397111
	57.7	-2.23143	-2.74194	4.19899	0.41621		-0.33183	0.0879176	-1.84068	0.442194
	57.8	-1.72353	-1.70963	4.40518	0.579653		0.0319423	1.85735	0.257019	-0.0209915
	57.9	-1.68316	-1.47352	3.99055	0.841447		0.153666	1.69484	0.839322	-0.0336535
	58	-1.79928	-0.177651	1.99591	1.40328		0.340727	1.37739	-0.0320784	0.55919
	58.1	-0.588667	0.382734	1.26617	1.59416		-0.0268221	0.358626	0.113407	-0.0931627
	58.2	-0.247364	-0.0154662	0.513976	1.08224		-0.257628	1.90818	1.16701	0.513438
	58.3	0.0477864	0.0683505	-1.8734	0.574942		-0.314528	1.23965	0.371395	-0.244238
	58.4	-0.313621	0.290255	-4.01143	0.517516		-0.34792	0.506347	-0.114719	-0.077766
	58.5	-1.16604	0.16814	-2.23708	0.365644		-0.521922	1.65337	-1.28941	0.150367
	58.6	-1.32528	0.0795211	-1.12822	0.9291		-0.516326	1.37552	2.32311	-0.678531
	58.7	-1.69827	-0.731654	-1.51511	1.40305		-0.566894	1.21665	2.21671	0.171081
	58.8	-2.50206	0.154196	0.365438	1.90139		-0.495942	-0.121395	1.65357	-0.180639
	58.9	-1.60993	-0.150489	2.95398	1.7647		-0.749597	0.552758	2.62013	0.0268974
	59	-2.06583	-0.636376	2.84338	1.66004		-0.654413	0.267379	3.24089	0.484608
	59.1	-1.44803	0.0634511	1.2188	0.681752		-0.402124	-0.413025	2.17364	-0.331376
	59.2	-0.87507	-0.96541	0.839957	0.644817		-0.365533	0.12621	0.694352	0.545913
	59.3	-0.981338	-1.78577	0.629221	0.461103		-0.360763	1.92664	0.403165	-0.101976
	59.4	-0.664573	-2.12189	-0.862332	-0.727515		-0.335191	1.30034	1.97859	-0.0515916
	59.5	-0.605545	-2.7561	-0.51243	-0.453157		-0.285316	1.02346	1.30343	0.223496
	59.6	-1.31413	-1.933	2.05928	-0.0259266		-0.202444	1.45684	0.562539	-0.416377
	59.7	-1.16169	-1.37748	3.31675	0.485461		-0.172474	1.69042	1.72951	0.533607
	59.8	-1.45021	-0.491186	4.19899	1.39879		0.079505	0.892458	1.45074	0.0236763
	59.9	-0.87301	0.0271195	4.40518	0.956213		0.211384	-0.959973	1.29268	0.0875146
	60	-0.189269	-0.11686	3.99055	0.879316		0.122942	0.700621	-0.0618702	0.755459
	60.1	-0.256507	0.314797	1.99591	1.07196		0.134577	0.973992	0.625245	0.134041
	60.2	0.384531	0.124425	1.26617	0.707508		-0.037465	0.0959742	0.338817	0.863427
	60.3	0.361699	-0.579314	0.513976	0.485835		0.0218946	0.0692864	-0.348404	0.0978076
	60.4	0.0148945	-0.717094	-1.8734	0.618646		-0.0173493	2.10378	0.201894	0.278625
	60.5	0.176945	-1.72485	-3.57223	0.633955		-0.0170837	1.30632	2.03184	0.637882
	60.6	0.0248627	-1.95482	-2.90207	0.41621		0.269582	1.3902	1.39956	-0.0257701
	60.7	-0.0693327	-2.1623	-2.00467	0.579653		0.311942	-0.450786	1.12178	0.714389
	60.8	0.0629622	-1.84605	-0.536112	0.841447		0.423272	0.121228	1.56466	0.290831
	60.9	-0.474991	-0.61798	0.4195	1.40328		0.595218	-0.03797	1.8048	0.5924
	61	-0.61076	-0.719691	0.170281	1.59416		0.545167	-0.496226	0.998294	0.768595
	61.1	-1.6021	-0.508969	-1.40863	1.08224		0.551147	0.622345	-0.878141	0.0297993
	61.2	-1.309	0.272434	-0.160326	0.574942		0.298049	0.424873	0.851861	1.13752
	61.3	-0.480498	-0.523036	2.33215	0.517516		0.154305	-1.06218	0.808993	0.763682
	61.4	-0.103428	-0.65518	5.69458	0.365644		0.216574	0.695743	0.987603	0.981791
	61.5	0.456238	0.105332	6.10481	0.9291		0.00615393	-0.447089	-0.210431	1.07815
	61.6	0.556446	0.544641	6.90863	1.40305		0.0706459	-0.992927	1.64086	0.0596417
	61.7	0.0497316	1.8874	6.6937	1.90139		-0.0419512	1.62775	0.844408	0.703899
	61.8	-0.688059	0.902632	5.0883	1.7647		0.0496516	1.27861	0.163672	-0.0808892
	61.9	-1.57799	-0.352527	3.55879	1.66004		0.0252857	1.35392	-0.179464	0.0200792
	62	-1.39996	-1.04923	4.01885	0.517476		0.129784	0.848326	2.03184	0.510287
	62.1	-0.959469	-2.77814	3.49122	0.67225		0.114578	1.01818	1.39956	0.156379
	62.2	-0.570405	-3.59002	3.41752	0.546245		0.101381	1.8885	1.12178	0.155735
	62.3	-0.291346	-2.76934	1.80126	0.301394		-0.0345724	0.405919	1.56466	0.487231
	62.4	-0.264363	-2.37509	2.09399	0.897878		0.0132441	0.64923	1.8048	0.0860867
	62.5	-0.31122	-1.6404	2.63414	0.424654		0.0642329	1.79346	0.998294	0.0831612
	62.6	-0.165399	-1.15538	2.95184	0.501892		0.19158	0.935344	-0.878141	0.383824
	62.7	-0.408976	-0.372733	2.23559	0.732382		0.328655	-0.955053	0.864584	0.669809
	62.8	-0.397519	-0.449335	0.471651	0.472687		0.735772	0.488709	0.377944	1.18786
	62.9	-0.395271	-0.380968	-0.956135	1.1409		0.783406	0.648595	1.33141	1.07815
	63	-0.478846	0.863687	-2.79121	0.956213		0.904451	-0.356115	0.739773	0.0596417
	63.1	-0.938621	1.17942	-2.76469	0.879316		0.792226	0.0879176	1.73736	0.703899
	63.2	-1.54901	0.0768847	0.197229	1.07196		0.727951	1.85735	1.60091	-0.0808892
	63.3	-1.72873	-0.310501	2.46078	0.707508		0.761546	1.69484	2.3396	0.0200792
	63.4	-1.84504	-0.386371	3.31675	0.485835		0.443447	1.37739	1.09915	0.510287
	63.5	-1.33923	-0.485101	4.19899	0.618646		0.481416	0.358626	1.43368	-0.207883
	63.6	-0.51787	-2.01892	4.40518	0.633955		0.596176	1.90818	0.403165	0.945125
	63.7	-0.185765	-1.81517	3.99055	0.41621		0.490605	1.23965	1.97859	0.356153
	63.8	-0.0304528	-0.503519	1.70147	0.579653		0.722541	0.506347	1.30343	0.443378
	63.9	0.358522	-0.306219	0.863704	0.841447		0.678895	1.65337	0.562539	0.850413
	64	0.343196	-0.329799	1.07163	1.40328		0.859282	1.37552	1.72951	-0.0114552
	64.1	0.241853	-0.140611	0.907637	1.59416		1.25859	1.21665	1.45074	0.690763
	64.2	-0.24387	-1.18205	-0.580506	1.08224		1.20554	-0.121395	1.29268	0.23762
	64.3	-0.364551	-2.55272	-1.59328	0.574942		1.33449	0.552758	-0.0618702	0.236236
	64.4	-0.12734	-3.31209	-1.86873	0.517516		0.975263	0.267379	0.625245	0.475572
	64.5	0.0588925	-2.74194	0.303887	0.365644		0.642549	-0.413025	0.338817	-0.397111
	64.6	-0.00297023	-1.70963	2.33215	0.9291		0.57125	0.12621	-0.348404	0.442194
	64.7	0.667897	-1.47352	5.69458	1.40305		0.286249	1.92664	0.201894	-0.0209915
	64.8	0.482124	-0.177651	6.10481	1.90139		0.162047	1.30034	2.03184	-0.0336535
	64.9	0.195013	0.382734	6.90863	1.7647		0.467063	1.02346	1.39956	0.55919
	65	-0.433511	-0.0154662	6.6937	1.66004		0.207042	1.45684	1.12178	-0.0931627
	65.1	-1.24028	0.0683505	5.0883	0.681752		0.295007	1.69042	1.56466	0.513438
	65.2	-1.24867	0.290255	3.55879	0.644817		0.294316	0.892458	1.8048	-0.244238
	65.3	-1.61767	0.16814	4.01885	0.461103		0.544892	-0.959973	0.998294	-0.077766
	65.4	-1.24727	0.0795211	3.49122	-0.727515		0.839762	0.700621	-0.878141	0.150367
	65.5	0.124665	-0.731654	3.41752	-0.453157		0.930814	0.973992	-0.191396	-0.678531
	65.6	0.421029	0.154196	1.80126	-0.0259266		0.882067	0.0959742	2.22015	0.171081
	65.7	0.943142	-0.150489	2.09399	0.485461		0.591788	0.0692864	2.13018	-0.180639
	65.8	1.3804	-0.636376	2.63414	1.39879		0.205325	2.10378	1.92743	0.0268974
	65.9	1.33041	0.0634511	2.95184	0.956213		0.24447	1.31902	1.98571	0.484608
	66	1.38873	-0.96541	2.23559	0.879316		0.331661	0.644072	2.42904	-0.331376
	66.1	0.984636	-1.78577	0.471651	1.07196		0.499398	0.427331	0.856439	0.545913
	66.2	1.53215	-2.12189	-0.956135	0.707508		0.703835	1.27496	0.560418	-0.101976
	66.3	1.41943	-2.7561	-2.79121	0.485835		0.997417	0.881701	0.739773	-0.0515916
	66.4	0.553315	-1.933	-2.76469	0.618646		1.38501	-0.364729	1.73736	0.223496
	66.5	0.469362	-1.15918	0.197229	0.633955		1.11206	1.6958	1.60091	-0.416377
	66.6	0.46006	-0.635239	2.46078	0.41621		1.1954	2.20162	2.3396	0.533607
	66.7	0.0503179	0.0195848	3.31675	0.579653		0.963296	1.67683	1.09915	0.0236763
	66.8	0.425473	-0.598057	4.19899	0.841447		0.698989	1.42613	1.43368	0.0875146
	66.9	0.7482	-1.72485	4.40518	1.40328		0.561212	2.71181	0.403165	0.755459
	67	1.36985	-1.95482	3.99055	1.59416		0.286249	1.71555	1.97859	0.134041
	67.1	0.566769	-2.1623	1.88598	1.08224		0.162047	1.06196	1.30343	0.863427
	67.2	0.0708554	-1.84605	0.701763	0.574942		0.467063	0.578129	0.562539	0.0978076
	67.3	0.266352	-0.61798	1.18186	0.517516		0.207042	1.53579	1.72951	0.278625
	67.4	0.550526	-0.719691	0.254115	0.365644		0.295007	0.759715	1.45074	0.637882
	67.5	0.313518	-0.508969	-2.12226	0.9291		0.294316	-0.451337	1.29268	-0.0257701
	67.6	0.963203	0.272434	-2.20953	1.40305		0.544892	0.457381	-0.0618702	0.714389
	67.7	1.53793	-0.523036	-2.57043	1.90139		0.839762	1.02777	0.625245	0.290831
	67.8	1.61015	-0.65518	-2.30554	1.7647		0.930814	0.420342	0.338817	0.5924
	67.9	1.57351	0.105332	0.197229	1.66004		0.882067	0.947839	-0.348404	0.768595
	68	1.54225	0.544641	2.46078	0.517476		0.591788	2.79042	0.201894	0.424723
	68.1	1.93098	1.01625	3.31675	0.67225		0.205325	2.6613	2.03184	0.470728
	68.2	2.21231	1.05028	4.19899	0.546245		0.24447	1.58971	1.39956	0.688896
	68.3	2.51436	1.62356	4.40518	0.301394		0.331661	2.14328	1.12178	0.335655
	68.4	2.85447	2.03041	3.99055	0.897878		0.499398	2.26175	1.56466	0.336863
	68.5	2.85007	0.911129	1.99591	0.424654		0.879241	0.664366	1.8048	-0.719767
	68.6	2.01486	-0.448273	1.26617	0.501892		1.01915	1.56725	0.998294	0.390895
	68.7	1.28049	-1.28406	0.159104	0.732382		0.855969	1.24593	-0.878141	0.270449
	68.8	0.314946	-2.69627	-1.18719	0.472687		0.59033	1.09847	0.864584	0.0831612
	68.9	0.768811	-3.31209	-3.24638	1.1409		0.323285	0.848326	0.377944	0.383824
	69	0.913682	-2.74194	-2.59884	0.956213		0.280216	1.01818	1.33141	0.669809
	69.1	1.65907	-1.70963	-1.86484	0.879316		0.318344	1.8885	0.739773	1.18786
	69.2	1.49207	-1.47352	-2.32061	1.07196		0.507916	0.405919	1.73736	1.07815
	69.3	2.21095	-0.177651	-2.168	0.707508		0.839762	0.64923	1.60091	0.0596417
	69.4	1.99423	0.382734	0.888063	0.485835		0.930814	1.79346	2.3396	0.703899
	69.5	2.38531	-0.0154662	2.33215	0.618646		0.882067	0.935344	1.09915	-0.0808892
	69.6	1.7313	0.0683505	5.69458	0.633955		0.591788	-0.955053	1.43368	0.0200792
	69.7	2.27765	0.290255	6.10481	0.41621		0.205325	0.488709	0.403165	0.510287
	69.8	2.11213	0.16814	6.90863	0.579653		0.24447	0.648595	1.97859	-0.207883
	69.9	2.27236	0.0795211	6.6937	0.841447		0.331661	-0.356115	1.30343	0.945125
	70	1.43641	-0.731654	5.0883	1.40328		0.499398	0.0879176	1.24629	0.356153
	70.1	1.51265	0.154196	3.55879	1.59416		0.703835	1.85735	0.847635	0.443378
	70.2	0.964737	-0.150489	4.01885	1.08224		0.997417	1.69484	1.04922	0.850413
	70.3	1.48642	-0.636376	3.49122	0.574942		1.38501	1.37739	-1.05286	-0.0114552
	70.4	0.96307	0.0634511	3.41752	0.517516		1.11206	0.358626	-0.564544	0.690763
	70.5	0.457921	-0.96541	1.80126	0.365644		1.1954	1.90818	-1.1285	0.23762
	70.6	0.0666301	-1.78577	2.09399	0.9291		0.963296	1.23965	0.847745	0.236236
	70.7	0.359388	-2.12189	2.63414	1.40305		0.698989	0.506347	1.36171	0.475572
	70.8	-0.0717484	-2.7561	2.95184	1.90139		0.561212	1.65337	1.73736	-0.397111
	70.9	-0.125641	-1.933	2.23559	1.7647		0.286249	1.37552	1.60091	0.442194
	71	0.15306	-1.22014	0.471651	1.66004		0.162047	1.21665	2.3396	-0.0209915
	71.1	1.04531	-0.436024	-0.956135	0.681752		0.467063	-0.121395	1.09915	-0.0336535
	71.2	1.7821	0.148755	-2.79121	0.644817		0.207042	0.552758	1.43368	0.55919
	71.3	1.26785	-0.920761	-2.76469	0.461103		0.295007	0.267379	0.170565	-0.0931627
	71.4	0.793319	-2.07259	0.197229	-0.727515		0.294316	-0.413025	1.77091	0.513438
	71.5	0.309423	-2.37421	2.46078	-0.453157		0.544892	0.12621	1.64053	-0.244238
	71.6	0.191657	-2.74387	3.31675	-0.0259266		0.839762	1.92664	2.01664	-0.077766
	71.7	0.350993	-1.93219	4.19899	0.485461		0.930814	1.30034		0.150367
	71.8	1.1094	-1.47352	4.40518	1.39879		0.882067	1.02346		-0.678531
	71.9	1.72897	-0.177651	3.99055	0.956213		0.591788	1.45684		0.171081
	72	2.39421	0.382734	1.93096	0.879316		0.205325	1.69042		-0.180639
	72.1	2.62216	0.437254	0.725291	1.07196		0.24447	0.892458		0.0268974
	72.2	2.24684	-0.616352	0.898654	0.707508		0.331661	-0.959973		0.484608
	72.3	1.73583	-0.178118	-0.0736991	0.485835		0.4363	0.180834		-0.331376
	72.4	1.322	-0.319744		0.618646		0.933906	1.25768		0.545913
	72.5	1.22259	-0.814371		0.633955		1.06497	1.27585		-0.101976
	72.6	0.864377	-0.689645		0.41621		1.15875	1.66001		-0.0515916
	72.7	0.613379	0.24614		0.579653		0.638832	2.82427		0.223496
	72.8	0.400108	0.361997		0.841447		0.535215	1.95381		-0.416377
	72.9	1.1913	0.271372		1.40328		0.563714	2.25219		0.533607
	73	1.70171	-0.545893		1.59416		0.349634	0.602145		0.0236763
	73.1	2.26484			1.08224		0.162047	0.759715		0.0875146
	73.2	2.28163			0.574942		0.467063	0.320517		0.755459
	73.3	3.01598			0.517516		0.207042	-0.0991023		0.134041
	73.4	3.12725			0.355844		0.295007	-0.149439		0.863427
	73.5	2.5844			1.18073		0.294316	-1.09369		0.0978076
	73.6	1.42425			1.30765		0.544892			0.278625
	73.7	0.98514			1.40513		0.839762			0.637882
	73.8	0.874844					0.930814			-0.0257701
	73.9	1.13192					0.882067			0.716792
	74	0.984879					0.591788			0.705524
	74.1	1.9183					0.205325			0.243781
	74.2	2.04607					0.24447			0.129475
	74.3	2.12629					0.331661			-0.629715
	74.4	1.83056					0.474759			-0.361437
	74.5	1.20761					0.766098
	74.6	1.32007					1.05108
	74.7	1.37558					1.19544
	74.8	1.04231					1.04953
	74.9	1.25206
	75	0.908073
	75.1	1.19161
	75.2	1.11609

## Sheet: Supp Fig 5 - Statistics
	N419-Ixo			N419-ACh			N419-Arec			N419-Pilo
	Unpaired t test with Welch's correction			Unpaired t test with Welch's correction			Unpaired t test with Welch's correction			Unpaired t test with Welch's correction
	P value	0.9383		P value	0.5686		P value	0.9402		P value	0.0004
	P value summary	ns		P value summary	ns		P value summary	ns		P value summary	***
	Significantly different (P < 0.05)?	No		Significantly different (P < 0.05)?	No		Significantly different (P < 0.05)?	No		Significantly different (P < 0.05)?	Yes
	One- or two-tailed P value?	Two-tailed		One- or two-tailed P value?	Two-tailed		One- or two-tailed P value?	Two-tailed		One- or two-tailed P value?	Two-tailed
	Welch-corrected t, df	t=0.07808, df=28.26		Welch-corrected t, df	t=0.5729, df=66.30		Welch-corrected t, df	t=0.07566, df=32.64		Welch-corrected t, df	t=4.623, df=13.83
	How large is the effect?			How large is the effect?			How large is the effect?			How large is the effect?
	Mean of column M	-13.64		Mean of column M	-10.87		Mean of column AB	9.814		Mean of column M	-3.764
	Mean of column N	-13.76		Mean of column N	-11.66		Mean of column AC	9.718		Mean of column N	-8.626
	Difference between means (N - M) ± SEM	-0.1208 ± 1.547		Difference between means (N - M) ± SEM	-0.7938 ± 1.385		Difference between means (AC - AB) ± SEM	-0.09569 ± 1.265		Difference between means (N - M) ± SEM	-4.862 ± 1.052
	95% confidence interval	-3.289 to 3.047		95% confidence interval	-3.560 to 1.972		95% confidence interval	-2.670 to 2.478		95% confidence interval	-7.120 to -2.604
	R squared (eta squared)	0.0002156		R squared (eta squared)	0.004927		R squared (eta squared)	0.0001753		R squared (eta squared)	0.607
