# Supplementary material for: Ligand-specific activation trajectories dictate GPCR signalling in cells
Source: Nature. 2026 Jan 14;650(8103):1053–62. doi: 10.1038/s41586-025-09963-3 (PMC12935549; doi:10.1038/s41586-025-09963-3)
Supplement: Supplementary file 7 — Supplementary Data 4: source data for Supplementary Fig. 6. [file 41586_2025_9963_MOESM7_ESM.xlsx]

## Sheet: Supp Fig 6a
	GoA(G203T)					Endogenous G proteins					GoA(G203T)					Endogenous G proteins					GoA(G203T)					Endogenous G proteins
	T84-Ixo	T84-ACh	T84-Arec	T84-Pilo		T84-Ixo	T84-ACh	T84-Arec	T84-Pilo		F181-Ixo	F181-ACh	F181-Arec	F181-Pilo		F181-Ixo	F181-ACh	F181-Arec	F181-Pilo		A414-Ixo	A414-ACh	A414-Arec	A414-Pilo		A414-Ixo	A414-ACh	A414-Arec	A414-Pilo
	245.407	116.62	166.002	61.8184		100.75	102.475	48.4998	32.3472		50.1311	80.6512	35.5812	48.8746		0.218265	121.423	33.7107	119.693		54.4897	89.0598	110.794	92.1247		104.29	53.4974	32.7221	14.9551
	244.353	141.647	112.222	24.2489		134.12	74.7144	28.4628	37.7096		48.6139	102.773	58.7793	31.9448		-0.00511559	67.5351	50.3694	124.501		43.8661	146.356	132.989	60.2134		99.1563	96.2639	30.6658	16.6899
	114.651	106.54	131.768	111.747		102.712	100.201	25.3764	46.1501		44.7309	58.2127	70.5543	45.6268		0.00133176	70.526	131.878	141.343		43.2655	181.116	153.379	86.0028		110.28	76.7563	28.3808	17.939
	80.0393	85.6527	143.486	100.498		151.174	101.902	23.9859	51.401		52.6826	103.228	75.7739	37.9977		1.25162	72.849	124.679	137.648		55.4646	157.937	121.543	71.6226		106.894	88.8207	25.5553	16.6348
	244.222	110.224	128.893	11.126		57.6425	112.337	35.7744	38.4261		52.0081	122.807	81.3715	50.9651		0.0186378	69.0726	110.944	148.945		59.5725	182.718	131.005	96.0652		57.005	126.996	58.546	16.9209
	263.868	86.2636	132.925	86.2636		60.8593	131.289	33.5477	40.9821		36.85	127.521	64.4816	41.3624		-0.0479161	72.3093	123.536	188.145		52.7987	169.658	125.525	77.9648		77.9972	122.116	61.9633	9.33269
	220.58	107.834	110.032	107.834		77.0641	132.631	24.2976	57.3762		40.6726	130.936	69.5013	26.9956		-0.329103	75.8425	121.13	210.283		29.9397	207.392	64.4615	50.8845		71.9033	118.561	49.8112	18.1759
	160.227	106.397	142.904	67.9242		87.3839	81.6735	30.5279	37.9057		36.5279	109.601	66.5944	37.8584		0.00852599	72.3246	128.119	175.767		68.6756	97.7757	59.4376	71.36		75.3053	114.556	41.1221	17.062
	243.304	53.8032	113.044	74.1543		51.8699	135.151	36.8538	78.6499		32.8702	119.105	62.1966	37.0733		0.175533	69.5688	99.0011	202.68		32.2896	132.219	10.532	69.8803		62.6968	102.536	50.0472	20.3591
	193.826	42.6698	121.501	106.397		57.0937	119.272	32.0784	81.654		40.0977	105.579	97.8597	29.1855		-0.67901	69.7555	32.8668	168.825		50.6222	140.003	29.2009	55.0124		77.7559	110.828	35.1677	20.9741
	218.108	55.857		53.7629		46.1992	91.0125	26.3829	98.1845		48.6592	112.475	78.8965	18.1356		0.0480832	61.1571	130.783	223.447		76.5617	142.339		34.1841		70.7036	97.2142	58.0076	22.1391
	162.251	55.3077		36.7437		237.38	100.839	22.8009	68.0691		37.5088	94.796	95.1618	25.2145		2.38728e-05	77.3936	170.855	149.192		25.182	86.3924		47.5273		97.4543	116.032	54.1467	22.8385
	193.197	153.865		44.1007		212.718	103.595	18.9729	85.1805		31.6579	86.8168	101.672	35.3941			63.8361	32.8668	150.271			90.9507		66.715		97.0893	116.125	50.0472	44.1598
	214.33	177.319		130.684		242.731	111.706	21.8829	81.4883		39.9618	80.8466	100.292	19.9568			59.355		124.3			121.227		37.617		99.8924	78.2095	47.3656	32.4571
	264.049			162.877		222.583	83.3015	45.5918	85.3308		57.5486	98.5365	103.74	19.8775			32.848		144.21			76.2509		52.2193		104.827	103.9	33.2354	40.0861
				25.6927		66.0189	137.594	35.7617	73.5079		29.0267	64.4073	86.174	94.1215			217.307		123.633			81.2353		68.9221		95.5838	115.068	31.8506	51.3204
				38.2254		48.4835	112.222	33.0487	51.8236		54.0574	81.8492	88.1009	97.5746			128.635		219.786			72.6756				106.725	122.366	29.1378	52.7845
				21.1648		64.6002	105.812	42.4484	61.8042		68.7779	93.8785	80.6544	103.775			124.986					81.3949				102.993	147.417	33.1656	51.7243
				52.0034		82.3065	102.918	12.0177	35.282		33.2801	92.0219	85.6881	106.67			127.625					104.858				113.64	99.1288	35.2706	33.4877
				124.1		127.082	73.2713	29.5952	14.942		12.117	71.8597	70.1645	102.409			121.227					93.0073				124.017	91.1349	43.8416	27.4711
						79.6721	65.5498	16.0631	18.84		54.8203	97.2006	83.5962				110.186					100.387				96.0024	77.0778	29.5158	31.0126
						65.5521	63.8697	8.23801	80.0686		12.1691	79.2419	60.3943				107.23					68.4843				75.6726	51.2379	20.8155	18.5891
						60.3877	67.0095	29.1483	37.1077		16.2671	118.661	84.0454				128.064					31.0795				92.5763	110.471	33.0463
						211.496	83.4007	8.58396	81.6044		33.1043	109.414	65.031				131.116					79.1762				92.3466	112.737	35.1677
						237.811	65.1237	31.5836	94.9293		23.4745	70.484	40.4535				95.137					52.0444				92.5651	97.4	58.0076
							66.4992		83.2145		25.792	88.1658	54.8285				74.5829					71.0308				76.0145	65.7002	54.1467
							98.7482		69.4989		21.8699	91.2372	63.7827				81.6243					46.8594				124.198	99.3396
							89.4039		69.6057		16.1584	92.1134	62.6195				92.4176					43.4534				112.319	96.5597
							110.092		54.687		13.2974	101.652	53.504				90.5424					48.4019				105.744	146.083
							94.014		60.1818			105.594	74.3972				105.794					60.0138				59.5396	94.2369
							136.027		50.9951			100.616	51.9859				72.1189					44.5053				46.259	90.0527
							116.644		49.625			122.588	82.448				48.8244									60.5604	87.8393
							101.309		45.7801			100.567	62.2356				91.3476									64.9556	73.7369
							115.838		41.9227			107.08	45.5642				90.0541									50.9772
							112.554		50.8816			102.599					81.9445									53.8054
									51.8888			99.8283					68.9108									46.9965
									54.8227			93.5159					70.7335									124.198
									51.6848			117.025					76.1981									112.319
									105.405			124.601					76.8215
												127.277					62.2354
												112.635					76.9956
																	74.8619
																	85.3962
																	153.777
																	138.821
																	162.254
																	130.247
																	86.6493
																	95.459
																	86.0873
																	98.2414
																	106.473
																	98.6558
																	88.5134
																	93.8768
																	151.114
																	158.326
																	140.308
																	132.901
																	142.226
																	164.311
																	129.181
																	148.265
																	160.051
																	150.208
																	143.148
																	52.6027
																	34.0427
																	69.693
																	73.3914
																	69.891
																	81.257
																	139.52
																	141.428
																	101.989
																	108.379

## Sheet: Supp Fig 6a - Statistics
	T84-GoA										F181-GoA										A414-GoA
	Dunnett's multiple comparisons test	Mean diff.	95.00% CI of diff.	Below threshold?	Summary	Adjusted P Value	B-?				Dunnett's multiple comparisons test	Mean diff.	95.00% CI of diff.	Below threshold?	Summary	Adjusted P Value	B-?				Dunnett's multiple comparisons test	Mean diff.	95.00% CI of diff.	Below threshold?	Summary	Adjusted P Value	B-?
	ACh-GoA vs. Ixo-GoA	-104.2	-142.3 to -66.03	Yes	****	<0.0001	A	Ixo-GoA			ACh-GoA vs. Ixo-GoA	63.29	51.72 to 74.85	Yes	****	<0.0001	A	Ixo-GoA			ACh-GoA vs. Ixo-GoA	50.61	19.02 to 82.19	Yes	***	0.0007	A	Ixo-GoA
	ACh-GoA vs. Arec-GoA	-30.28	-72.77 to 12.21	No	ns	0.2146	C	Arec-GoA			ACh-GoA vs. Arec-GoA	27.7	16.65 to 38.76	Yes	****	<0.0001	C	Arec-GoA			ACh-GoA vs. Arec-GoA	6.113	-27.67 to 39.90	No	ns	0.9561	C	Arec-GoA
	ACh-GoA vs. Pilo-GoA	27.93	-7.829 to 63.69	No	ns	0.157	D	Pilo-GoA			ACh-GoA vs. Pilo-GoA	49.45	36.45 to 62.45	Yes	****	<0.0001	D	Pilo-GoA			ACh-GoA vs. Pilo-GoA	35.11	6.509 to 63.70	Yes	*	0.0115	D	Pilo-GoA
	Test details	Mean 1	Mean 2	Mean diff.	SE of diff.	n1	n2	q	DF		Test details	Mean 1	Mean 2	Mean diff.	SE of diff.	n1	n2	q	DF		Test details	Mean 1	Mean 2	Mean diff.	SE of diff.	n1	n2	q	DF
	ACh-GoA vs. Ixo-GoA	100	204.2	-104.2	15.79	14	15	6.595	55		ACh-GoA vs. Ixo-GoA	100	36.71	63.29	4.827	41	29	13.11	120		ACh-GoA vs. Ixo-GoA	100	49.39	50.61	12.97	31	12	3.902	65
	ACh-GoA vs. Arec-GoA	100	130.3	-30.28	17.6	14	10	1.721	55		ACh-GoA vs. Arec-GoA	100	72.3	27.7	4.615	41	34	6.003	120		ACh-GoA vs. Arec-GoA	100	93.89	6.113	13.87	31	10	0.4407	65
	ACh-GoA vs. Pilo-GoA	100	72.07	27.93	14.81	14	20	1.886	55		ACh-GoA vs. Pilo-GoA	100	50.55	49.45	5.426	41	20	9.113	120		ACh-GoA vs. Pilo-GoA	100	64.89	35.11	11.74	31	16	2.99	65
	ANOVA summary										ANOVA summary										ANOVA summary
	F	29.26									F	64.65									F	6.62
	P value	<0.0001									P value	<0.0001									P value	0.0006
	P value summary	****									P value summary	****									P value summary	***
	Significant diff. among means (P < 0.05)?	Yes									Significant diff. among means (P < 0.05)?	Yes									Significant diff. among means (P < 0.05)?	Yes
	R squared	0.6148									R squared	0.6178									R squared	0.234
	Brown-Forsythe test										Brown-Forsythe test										Brown-Forsythe test
	F (DFn, DFd)	2.243 (3, 55)									F (DFn, DFd)	2.571 (3, 120)									F (DFn, DFd)	4.808 (3, 65)
	P value	0.0935									P value	0.0574									P value	0.0044
	P value summary	ns									P value summary	ns									P value summary	**
	Are SDs significantly different (P < 0.05)?	No									Are SDs significantly different (P < 0.05)?	No									Are SDs significantly different (P < 0.05)?	Yes
	Bartlett's test										Bartlett's test										Bartlett's test
	Bartlett's statistic (corrected)	10.35									Bartlett's statistic (corrected)	16.12									Bartlett's statistic (corrected)	24.82
	P value	0.0158									P value	0.0011									P value	<0.0001
	P value summary	*									P value summary	**									P value summary	****
	Are SDs significantly different (P < 0.05)?	Yes									Are SDs significantly different (P < 0.05)?	Yes									Are SDs significantly different (P < 0.05)?	Yes
	ANOVA table	SS	DF	MS	F (DFn, DFd)	P value					ANOVA table	SS	DF	MS	F (DFn, DFd)	P value					ANOVA table	SS	DF	MS	F (DFn, DFd)	P value
	Treatment (between columns)	158579	3	52860	F (3, 55) = 29.26	P<0.0001					Treatment (between columns)	76757	3	25586	F (3, 120) = 64.65	P<0.0001					Treatment (between columns)	28894	3	9631	F (3, 65) = 6.620	P=0.0006
	Residual (within columns)	99351	55	1806							Residual (within columns)	47494	120	395.8							Residual (within columns)	94569	65	1455
	Total	257930	58								Total	124251	123								Total	123464	68
	Data summary										Data summary										Data summary
	Number of treatments (columns)	4									Number of treatments (columns)	4									Number of treatments (columns)	4
	Number of values (total)	59									Number of values (total)	124									Number of values (total)	69
	T84-Endogenous G proteins										F181-Endogenous G proteins										A414-Endogenous G proteins
	Dunnett's multiple comparisons test	Mean diff.	95.00% CI of diff.	Below threshold?	Summary	Adjusted P Value	G-?				Dunnett's multiple comparisons test	Mean diff.	95.00% CI of diff.	Below threshold?	Summary	Adjusted P Value	G-?				Dunnett's multiple comparisons test	Mean diff.	95.00% CI of diff.	Below threshold?	Summary	Adjusted P Value	G-?
	ACh-Gendo vs. Ixo-Gendo	-15.43	-37.76 to 6.904	No	ns	0.2451	F	Ixo-wt			ACh-Gendo vs. Ixo-Gendo	99.94	73.58 to 126.3	Yes	****	<0.0001	F	Ixo-wt			ACh-Gendo vs. Ixo-Gendo	12.02	1.025 to 23.01	Yes	*	0.0282	F	Ixo-wt
	ACh-Gendo vs. Arec-Gendo	71.94	49.61 to 94.27	Yes	****	<0.0001	H	Arec-wt			ACh-Gendo vs. Arec-Gendo	0.7124	-24.76 to 26.19	No	ns	0.9998	H	Arec-wt			ACh-Gendo vs. Arec-Gendo	59.2	47.09 to 71.32	Yes	****	<0.0001	H	Arec-wt
	ACh-Gendo vs. Pilo-Gendo	40.74	20.89 to 60.60	Yes	****	<0.0001	I	Pilo-wt			ACh-Gendo vs. Pilo-Gendo	-61.92	-84.69 to -39.15	Yes	****	<0.0001	I	Pilo-wt			ACh-Gendo vs. Pilo-Gendo	72.86	60.14 to 85.58	Yes	****	<0.0001	I	Pilo-wt
	Test details	Mean 1	Mean 2	Mean diff.	SE of diff.	n1	n2	q	DF		Test details	Mean 1	Mean 2	Mean diff.	SE of diff.	n1	n2	q	DF		Test details	Mean 1	Mean 2	Mean diff.	SE of diff.	n1	n2	q	DF
	ACh-Gendo vs. Ixo-Gendo	100	115.4	-15.43	9.353	35	25	1.649	120		ACh-Gendo vs. Ixo-Gendo	100	0.05507	99.94	10.9	76	12	9.168	114		ACh-Gendo vs. Ixo-Gendo	100	87.98	12.02	4.604	33	38	2.611	115
	ACh-Gendo vs. Arec-Gendo	100	28.06	71.94	9.353	35	25	7.691	120		ACh-Gendo vs. Arec-Gendo	100	99.29	0.7124	10.53	76	13	0.06763	114		ACh-Gendo vs. Arec-Gendo	100	40.8	59.2	5.074	33	26	11.67	115
	ACh-Gendo vs. Pilo-Gendo	100	59.26	40.74	8.317	35	39	4.899	120		ACh-Gendo vs. Pilo-Gendo	100	161.9	-61.92	9.415	76	17	6.577	114		ACh-Gendo vs. Pilo-Gendo	100	27.14	72.86	5.325	33	22	13.68	115
	ANOVA summary										ANOVA summary										ANOVA summary
	F	33.29									F	50.03									F	93.11
	P value	<0.0001									P value	<0.0001									P value	<0.0001
	P value summary	****									P value summary	****									P value summary	****
	Significant diff. among means (P < 0.05)?	Yes									Significant diff. among means (P < 0.05)?	Yes									Significant diff. among means (P < 0.05)?	Yes
	R squared	0.4542									R squared	0.5683									R squared	0.7084
	Brown-Forsythe test										Brown-Forsythe test										Brown-Forsythe test
	F (DFn, DFd)	14.31 (3, 120)									F (DFn, DFd)	5.668 (3, 114)									F (DFn, DFd)	4.475 (3, 115)
	P value	<0.0001									P value	0.0012									P value	0.0052
	P value summary	****									P value summary	**									P value summary	**
	Are SDs significantly different (P < 0.05)?	Yes									Are SDs significantly different (P < 0.05)?	Yes									Are SDs significantly different (P < 0.05)?	Yes
	Bartlett's test										Bartlett's test										Bartlett's test
	Bartlett's statistic (corrected)	97.54									Bartlett's statistic (corrected)	84.94									Bartlett's statistic (corrected)	17.33
	P value	<0.0001									P value	<0.0001									P value	0.0006
	P value summary	****									P value summary	****									P value summary	***
	Are SDs significantly different (P < 0.05)?	Yes									Are SDs significantly different (P < 0.05)?	Yes									Are SDs significantly different (P < 0.05)?	Yes
	ANOVA table	SS	DF	MS	F (DFn, DFd)	P value					ANOVA table	SS	DF	MS	F (DFn, DFd)	P value					ANOVA table	SS	DF	MS	F (DFn, DFd)	P value
	Treatment (between columns)	127407	3	42469	F (3, 120) = 33.29	P<0.0001					Treatment (between columns)	184852	3	61617	F (3, 114) = 50.03	P<0.0001					Treatment (between columns)	104560	3	34853	F (3, 115) = 93.11	P<0.0001
	Residual (within columns)	153096	120	1276							Residual (within columns)	140396	114	1232							Residual (within columns)	43050	115	374.3
	Total	280503	123								Total	325248	117								Total	147610	118
	Data summary										Data summary										Data summary
	Number of treatments (columns)	4									Number of treatments (columns)	4									Number of treatments (columns)	4
	Number of values (total)	124									Number of values (total)	118									Number of values (total)	119

## Sheet: Supp Fig 6b
	GoA(G203T)					Endogenous G proteins					GoA(G203T)					Endogenous G proteins
	F188-Ixo	F188-ACh	F188-Arec	F188-Pilo		F188-Ixo	F188-ACh	F188-Arec	F188-Pilo		N419-Ixo	N419-ACh	N419-Arec	N419-Pilo		N419-Ixo	N419-ACh	N419-Arec	N419-Pilo
	44.0952	83.7752	74.1117	124.452		60.6115	99.7897	80.4275	144.061		110.739	186.096	111.487	36.6838		81.1667	162.926	70.742	71.0394
	49.5108	71.04	103.852	141.794		63.2597	128.385	92.1759	168.44		184.361	81.765	68.1888	25.5134		79.9645	205.823	99.533	56.2659
	73.6953	87.2382	68.6417	85.0263		121.439	142.205	80.6499	157.968		167.955	159.483	73.2045	33.0682		150.635	130.365	124.022	34.374
	60.8979	77.5327	63.9918	59.3959		99.8243	102.597	69.9533	139.83		235.301	131.084	76.7951	28.6217		137.999	103.855	87.2876	33.7923
	83.7081	71.0958	69.6186	129.172		106.199	113.591	96.5698	137.363		189.488	72.3087	72.7361	29.8078		140.933	107.21	63.3896	37.6727
	85.4427	71.208	73.1804	58.0703		107.502	117.961	117.228	121.027		86.1399	183.353	74.1257	33.205		111.378	145.146	70.8025	101.647
	81.515	52.9733	59.348	131.72		103.278	153.322	109.127	173.401		63.9282	79.8454	35.7075	29.229		110.331	140.982	69.5788	69.5362
	99.5106	82.2531	79.0205	114.64		82.8375	171.804	119.325	159.828		80.868	93.2447	47.32	37.9722		98.0045	105.134	74.4625	104.37
	70.695	106.438	16.2551	100.493		53.3328	138.477	97.3789	101.819		83.9331	104.458	33.2102	21.5985		154.41	79.5881	51.4537	112.704
	83.1543	141.822	6.06285	114.406		71.3179	109.21	90.4418	122.444		91.2399	111.514	37.0305	22.6919		144.388	75.3645	67.095	80.6388
	105.357	89.4094	11.2886	119.39		81.0025	150.97	109.771	100.754		70.1474	84.9509	64.7015	26.815		104.792	90.4904	71.4355	80.1851
	125.031	56.1358	8.12983	101.288		57.3042	133.19	62.5333	115.502		81.0786	91.8285	88.2449	19.9193		132.944	95.8146	38.935	113.852
	95.2461	183.041	18.1648	85.1129		142.221	126.643	64.6264	126.925		60.6995	90.7988	95.3528	54.9538		141.414	29.8026	49.2502
	25.8211	130.371		70.3997		146.875	85.6655	48.2609	192.15		157.749	126.024		7.35612		111.593	23.8271	74.2013
	96.8415	95.5678		130.22		135.688	100.261	58.6012	173.888		119.877	127.067		46.637		128.891	20.4438	133.056
	71.0318	85.3186		134.998		189.104	126.9	76.6706	153.567		34.8274	43.5622		21.0456		96.7357	106.116	135.131
		111.157		143.576		76.7734	84.3654	46.4705	139.797		149.811	45.0571				111.593	42.5436	136.108
		64.8639				96.6338	139.071	85.4422	105.143		122.941	116.206				128.891	60.0312	135.925
		95.1972				40.6381	135.567	93.4042	112.05		99.4926	116.528				96.7357	58.2887	135.079
		116.046				63.2361	116.137	93.7238	77.161		69.613	133.698					54.1229	63.4477
		175.535				50.4931	105.934	86.0973	59.4985		59.4804	90.3709					64.4834	51.9136
		98.2275					84.5829	62.0081	48.652		47.1853	82.908					68.1781	48.1036
		67.2558					64.9077	47.5837	104.782			62.5272					48.4212
		91.3911					99.1443	73.0788	62.6235			82.1423					106.116
		156.5					87.0875	54.0132	95.0381			93.9827					66.5796
		138.606					79.9609	71.0783	81.5665			85.9823					45.1952
							77.9657	65.6654	60.294			77.5658					48.7592
							76.3551	55.3059				45.6475					116.789
							74.9934	50.7051									170.454
							80.6661	77.5411									114.143
							77.5186	59.2936									192.821
							80.396	64.134									187.546
							78.7754	56.7322									166.891
							60.8013	33.0893									164.598
							63.3661	45.2636									101.153
							129.796
							108.098
							151.345
							115.285
							166.086
							127.36
							117.112
							88.8913
							41.943
							85.6912
							55.3021
							56.4255
							170.755
							170.856
							162.478
							138.995
							78.7488
							92.0598
							55.9595
							56.8707
							55.4749
							112.707
							118.932
							130.289
							68.42
							102.815
							108.098
							122.075
							110.318
							69.2038
							71.9131
							75.6144
							76.6916
							77.3085
							150.676
							136.71
							108.698
							115.845
							45.6862
							62.7013
							92.2967
							95.2337
							71.5322
							134.328
							34.6604
							43.6611
							37.4355
							32.0491

## Sheet: Supp Fig 6b - Statistics
	F188-GoA										N419-GoA
	Dunnett's multiple comparisons test	Mean diff.	95.00% CI of diff.	Below threshold?	Summary	Adjusted P Value	B-?				Dunnett's multiple comparisons test	Mean diff.	95.00% CI of diff.	Below threshold?	Summary	Adjusted P Value	B-?
	ACh-GoA vs. Ixo-GoA	63.29	51.72 to 74.85	Yes	****	<0.0001	A	Ixo-GoA			ACh-GoA vs. Ixo-GoA	-7.584	-33.11 to 17.94	No	ns	0.8326	A	Ixo-GoA
	ACh-GoA vs. Arec-GoA	27.7	16.65 to 38.76	Yes	****	<0.0001	C	Arec-GoA			ACh-GoA vs. Arec-GoA	32.45	2.380 to 62.53	Yes	*	0.0308	C	Arec-GoA
	ACh-GoA vs. Pilo-GoA	49.45	36.45 to 62.45	Yes	****	<0.0001	D	Pilo-GoA			ACh-GoA vs. Pilo-GoA	70.31	42.22 to 98.39	Yes	****	<0.0001	D	Pilo-GoA
	Test details	Mean 1	Mean 2	Mean diff.	SE of diff.	n1	n2	q	DF		Test details	Mean 1	Mean 2	Mean diff.	SE of diff.	n1	n2	q	DF
	ACh-GoA vs. Ixo-GoA	100	36.71	63.29	4.827	41	29	13.11	120		ACh-GoA vs. Ixo-GoA	100	107.6	-7.584	10.56	28	22	0.7184	75
	ACh-GoA vs. Arec-GoA	100	72.3	27.7	4.615	41	34	6.003	120		ACh-GoA vs. Arec-GoA	100	67.55	32.45	12.44	28	13	2.609	75
	ACh-GoA vs. Pilo-GoA	100	50.55	49.45	5.426	41	20	9.113	120		ACh-GoA vs. Pilo-GoA	100	29.69	70.31	11.61	28	16	6.054	75
	ANOVA summary										ANOVA summary
	F	64.65									F	16.98
	P value	<0.0001									P value	<0.0001
	P value summary	****									P value summary	****
	Significant diff. among means (P < 0.05)?	Yes									Significant diff. among means (P < 0.05)?	Yes
	R squared	0.6178									R squared	0.4044
	Brown-Forsythe test										Brown-Forsythe test
	F (DFn, DFd)	2.571 (3, 120)									F (DFn, DFd)	5.116 (3, 75)
	P value	0.0574									P value	0.0028
	P value summary	ns									P value summary	**
	Are SDs significantly different (P < 0.05)?	No									Are SDs significantly different (P < 0.05)?	Yes
	Bartlett's test										Bartlett's test
	Bartlett's statistic (corrected)	16.12									Bartlett's statistic (corrected)	31.69
	P value	0.0011									P value	<0.0001
	P value summary	**									P value summary	****
	Are SDs significantly different (P < 0.05)?	Yes									Are SDs significantly different (P < 0.05)?	Yes
	ANOVA table	SS	DF	MS	F (DFn, DFd)	P value					ANOVA table	SS	DF	MS	F (DFn, DFd)	P value
	Treatment (between columns)	76757	3	25586	F (3, 120) = 64.65	P<0.0001					Treatment (between columns)	69939	3	23313	F (3, 75) = 16.98	P<0.0001
	Residual (within columns)	47494	120	395.8							Residual (within columns)	102995	75	1373
	Total	124251	123								Total	172934	78
	Data summary										Data summary
	Number of treatments (columns)	4									Number of treatments (columns)	4
	Number of values (total)	124									Number of values (total)	79
	F188-Endogenous G proteins										N419-Endogenous G proteins
	Dunnett's multiple comparisons test	Mean diff.	95.00% CI of diff.	Below threshold?	Summary	Adjusted P Value	G-?				Dunnett's multiple comparisons test	Mean diff.	95.00% CI of diff.	Below threshold?	Summary	Adjusted P Value	G-?
	ACh-Gendo vs. Ixo-Gendo	7.163	-12.76 to 27.09	No	ns	0.7588	F	Ixo-wt			ACh-Gendo vs. Ixo-Gendo	-19.09	-46.37 to 8.181	No	ns	0.2407	F	Ixo-wt
	ACh-Gendo vs. Arec-Gendo	25.88	9.434 to 42.32	Yes	***	0.0007	H	Arec-wt			ACh-Gendo vs. Arec-Gendo	15.87	-10.18 to 41.91	No	ns	0.3513	H	Arec-wt
	ACh-Gendo vs. Pilo-Gendo	-19.84	-37.91 to -1.763	Yes	*	0.0267	I	Pilo-wt			ACh-Gendo vs. Pilo-Gendo	25.33	-6.693 to 57.35	No	ns	0.1572	I	Pilo-wt
	Test details	Mean 1	Mean 2	Mean diff.	SE of diff.	n1	n2	q	DF		Test details	Mean 1	Mean 2	Mean diff.	SE of diff.	n1	n2	q	DF
	ACh-Gendo vs. Ixo-Gendo	100	92.84	7.163	8.292	83	21	0.8639	162		ACh-Gendo vs. Ixo-Gendo	100	119.1	-19.09	11.28	35	19	1.693	84
	ACh-Gendo vs. Arec-Gendo	100	74.12	25.88	6.842	83	35	3.782	162		ACh-Gendo vs. Arec-Gendo	100	84.13	15.87	10.77	35	22	1.473	84
	ACh-Gendo vs. Pilo-Gendo	100	119.8	-19.84	7.521	83	27	2.637	162		ACh-Gendo vs. Pilo-Gendo	100	74.67	25.33	13.24	35	12	1.912	84
	ANOVA summary										ANOVA summary
	F	9.691									F	4.084
	P value	<0.0001									P value	0.0093
	P value summary	****									P value summary	**
	Significant diff. among means (P < 0.05)?	Yes									Significant diff. among means (P < 0.05)?	Yes
	R squared	0.1522									R squared	0.1273
	Brown-Forsythe test										Brown-Forsythe test
	F (DFn, DFd)	3.721 (3, 162)									F (DFn, DFd)	4.496 (3, 84)
	P value	0.0127									P value	0.0056
	P value summary	*									P value summary	**
	Are SDs significantly different (P < 0.05)?	Yes									Are SDs significantly different (P < 0.05)?	Yes
	Bartlett's test										Bartlett's test
	Bartlett's statistic (corrected)	11.57									Bartlett's statistic (corrected)	15.24
	P value	0.009									P value	0.0016
	P value summary	**									P value summary	**
	Are SDs significantly different (P < 0.05)?	Yes									Are SDs significantly different (P < 0.05)?	Yes
	ANOVA table	SS	DF	MS	F (DFn, DFd)	P value					ANOVA table	SS	DF	MS	F (DFn, DFd)	P value
	Treatment (between columns)	33503	3	11168	F (3, 162) = 9.691	P<0.0001					Treatment (between columns)	19206	3	6402	F (3, 84) = 4.084	P=0.0093
	Residual (within columns)	186690	162	1152							Residual (within columns)	131666	84	1567
	Total	220193	165								Total	150872	87
	Data summary										Data summary
	Number of treatments (columns)	4									Number of treatments (columns)	4
	Number of values (total)	166									Number of values (total)	88

## Sheet: Supp Fig 6c
	GoA(G203T)					Endogenous G proteins					GoA(G203T)					Endogenous G proteins
	E175-Ixo	E175-ACh	E175-Arec	E175-Pilo		E175-Ixo	E175-ACh	E175-Arec	E175-Pilo		P415-Ixo	P415-ACh	P415-Arec	P415-Pilo		P415-Ixo	P415-ACh	P415-Arec	P415-Pilo
	100.327	99.5372	100.613	100.219		86.4816	135.65	62.2564	23.1471		143.522	107.939	86.1123	48.0176		120.77	70.3997	65.9047	38.7139
	98.7155	100.275	99.7953	99.6429		66.8928	96.202	56.5895	31.3696		151.465	110.243	103.822	58.3686		87.5511	106.879	81.5619	43.0438
	100.008	99.1603	98.6109	100.126		73.3282	154.986	76.2686	39.9003		164.676	184.946	141.73	130.84		82.2571	90.7749	79.5129	54.5833
	99.4088	100.005	100.093	98.8918		85.8348	123.408	54.3639	53.6313		111.864	132.425	167.198	49.6453		98.2573	97.3817	87.55	48.1438
	101.203	100.782	99.2635	100.674		56.7466	117.329	57.9712	43.4955		45.4914	142.946	68.3251	80.6462		87.1281	135.682	77.4703	44.7118
	99.9073	99.8726	100.349	100.033		84.3343	71.7432	51.2088	57.9473		143.522	115.988	64.7793	68.2114		82.4837	124.328	74.9577	53.7348
	100.488	100.394	101.106	99.5184		87.923	114.172	38.5365	49.9273		151.465	137.067	132.359	52.2175		87.073	146.438	65.8048	41.0148
	99.6842	98.9377	99.4127	100.895		50.73	122.017	56.5101	60.2241		164.676	77.6695	127.574	41.2442		97.3315	130.741	76.5695	39.241
	100	100.009	100.009	99.9206		127.667	71.1724	51.7218	55.5972		111.864	75.4681	122.855	91.9265		72.2116	129.504	57.7924	46.6431
	100.943	99.6805	99.8862			150.648	82.0791		44.9749		45.4914	87.2593	127.054	91.3328		62.8163	135.193	56.9285	39.9321
	99.3211		100.429			97.2262	71.2557		66.9508		87.2052	98.4982	105.467			119.897	125.233	58.9316	38.6197
						112.731	65.1696		41.2492		126.361	96.3135	123.667			130.205	70.744	54.9695	38.8584
						116.406	90.2625		48.7633		108.169	86.2768	143.908			113.729	62.1494	67.0507	21.7783
							188.731		35.9371		86.4958	108.956	134.541			124.022	57.2474	64.3954	69.6777
							122.431		46.1485		121.617	29.0616	104.813			112.018	61.1929	84.5619	55.238
							113.881		55.5721		120.435	79.6416	121.899			100.117	105.849	80.5449	34.4677
							180.85		46.1351		76.7752	50.0473	121.851			102.149	102.959	82.2936	67.1358
							117.751		55.6806		75.4783	116.284	176.57			112.217	98.2759	76.0163	78.7062
							122.96		48.1664		60.3941	39.2499	53.6351			62.0305	95.1468	74.426	101.707
							128.008		41.2083		63.3256	109.533				106.796	92.632	64.0362	88.7177
							105.354		54.1575		103.38	114.187				111.656	128.705	52.5112	78.4406
							61.985		40.5547		14.1412					108.785	80.8272	74.7344	95.4942
							51.7932		42.4648		100.122					95.4751	83.5557	56.9761	78.6134
							91.5386		36.2222		131.695					112.836	119.592	47.1436	79.3317
							77.7667		29.8196		145.624					130.976	101.745	47.7903	53.5845
							69.3816				85.1849					114.544	81.8862	47.8842	63.0119
							88.3904				119.989					111.456	84.7688		40.7325
							69.343				104.522					113.409	35.7711		52.4983
							65.9727									113.666	85.7912		57.3915
							125.113									139.748	108.587		59.1532
							117.35									57.1294	106.107		64.1774
							108.559									61.0108	122.835		68.6986
							29.6108									64.0641	122.801		70.0688
							43.1597									50.599	122.383		71.5926
							55.9751									69.3438	122.133		54.9953
							101.078									73.839	128.186		69.6777
							133.563									87.5511	125.471		55.238
							130.081									82.2572	119.864		34.4677
							80.8693									98.2571	111.187		67.1358
							75.3149									87.1284	91.9317		78.7062
							76.7219										97.0213		81.3194
							125.113										96.4058		87.0945
							117.35										56.753		79.9698
							108.559										70.3836
																	92.8488
																	98.2511
																	84.4752
																	104.487
																	123.836
																	105.917
																	51.1838
																	86.7727
																	106.563
																	108.042
																	104.45
																	89.7308

## Sheet: Supp Fig 6c - Statistics
	E175-GoA										P415-GoA
	Dunnett's multiple comparisons test	Mean diff.	95.00% CI of diff.	Below threshold?	Summary	Adjusted P Value	B-?				Dunnett's multiple comparisons test	Mean diff.	95.00% CI of diff.	Below threshold?	Summary	Adjusted P Value	B-?
	ACh-GoA vs. Ixo-GoA	100.4	-417.6 to 618.4	No	ns	0.9337	A	Ixo-GoA			ACh-GoA vs. Ixo-GoA	-5.891	-30.29 to 18.50	No	ns	0.8941	A	Ixo-GoA
	ACh-GoA vs. Arec-GoA	70.83	-447.2 to 588.8	No	ns	0.9746	C	Arec-GoA			ACh-GoA vs. Arec-GoA	-17.27	-44.03 to 9.486	No	ns	0.2931	C	Arec-GoA
	ACh-GoA vs. Pilo-GoA	93.5	-451.2 to 638.2	No	ns	0.9522	D	Pilo-GoA			ACh-GoA vs. Pilo-GoA	28.76	-3.714 to 61.22	No	ns	0.0946	D	Pilo-GoA
	Test details	Mean 1	Mean 2	Mean diff.	SE of diff.	n1	n2	q	DF		Test details	Mean 1	Mean 2	Mean diff.	SE of diff.	n1	n2	q	DF
	ACh-GoA vs. Ixo-GoA	100	-0.425	100.4	211.6	10	11	0.4746	37		ACh-GoA vs. Ixo-GoA	100	105.9	-5.891	10.14	21	28	0.5812	74
	ACh-GoA vs. Arec-GoA	100	29.17	70.83	211.6	10	11	0.3347	37		ACh-GoA vs. Arec-GoA	100	117.3	-17.27	11.12	21	19	1.554	74
	ACh-GoA vs. Pilo-GoA	100	6.497	93.5	222.5	10	9	0.4202	37		ACh-GoA vs. Pilo-GoA	100	71.24	28.76	13.49	21	10	2.132	74
	ANOVA summary										ANOVA summary
	F	0.09046									F	3.885
	P value	0.9648									P value	0.0123
	P value summary	ns									P value summary	*
	Significant diff. among means (P < 0.05)?	No									Significant diff. among means (P < 0.05)?	Yes
	R squared	0.007281									R squared	0.1361
	Brown-Forsythe test										Brown-Forsythe test
	F (DFn, DFd)	0.1831 (3, 37)									F (DFn, DFd)	0.5657 (3, 74)
	P value	0.9072									P value	0.6393
	P value summary	ns									P value summary	ns
	Are SDs significantly different (P < 0.05)?	No									Are SDs significantly different (P < 0.05)?	No
	Bartlett's test										Bartlett's test
	Bartlett's statistic (corrected)	0.7393									Bartlett's statistic (corrected)	1.539
	P value	0.8639									P value	0.6733
	P value summary	ns									P value summary	ns
	Are SDs significantly different (P < 0.05)?	No									Are SDs significantly different (P < 0.05)?	No
	ANOVA table	SS	DF	MS	F (DFn, DFd)	P value					ANOVA table	SS	DF	MS	F (DFn, DFd)	P value
	Treatment (between columns)	63651	3	21217	F (3, 37) = 0.09046	P=0.9648					Treatment (between columns)	14366	3	4789	F (3, 74) = 3.885	P=0.0123
	Residual (within columns)	8677969	37	234540							Residual (within columns)	91226	74	1233
	Total	8741620	40								Total	105592	77
	Data summary										Data summary
	Number of treatments (columns)	4									Number of treatments (columns)	4
	Number of values (total)	41									Number of values (total)	78
	E175-Endogenous G proteins										P415-Endogenous G proteins
	Dunnett's multiple comparisons test	Mean diff.	95.00% CI of diff.	Below threshold?	Summary	Adjusted P Value	G-?				Dunnett's multiple comparisons test	Mean diff.	95.00% CI of diff.	Below threshold?	Summary	Adjusted P Value	G-?
	ACh-Gendo vs. Ixo-Gendo	7.927	-12.67 to 28.52	No	ns	0.7144	F	Ixo-wt			ACh-Gendo vs. Ixo-Gendo	3.88	-6.448 to 14.21	No	ns	0.7188	F	Ixo-wt
	ACh-Gendo vs. Arec-Gendo	43.84	19.97 to 67.71	Yes	****	<0.0001	H	Arec-wt			ACh-Gendo vs. Arec-Gendo	32.37	20.53 to 44.21	Yes	****	<0.0001	H	Arec-wt
	ACh-Gendo vs. Pilo-Gendo	54.03	37.69 to 70.37	Yes	****	<0.0001	I	Pilo-wt			ACh-Gendo vs. Pilo-Gendo	39.86	29.74 to 49.97	Yes	****	<0.0001	I	Pilo-wt
	Test details	Mean 1	Mean 2	Mean diff.	SE of diff.	n1	n2	q	DF		Test details	Mean 1	Mean 2	Mean diff.	SE of diff.	n1	n2	q	DF
	ACh-Gendo vs. Ixo-Gendo	100	92.07	7.927	8.498	44	13	0.9328	87		ACh-Gendo vs. Ixo-Gendo	100	96.12	3.88	4.323	56	40	0.8975	161
	ACh-Gendo vs. Arec-Gendo	100	56.16	43.84	9.849	44	9	4.451	87		ACh-Gendo vs. Arec-Gendo	100	67.63	32.37	4.956	56	26	6.532	161
	ACh-Gendo vs. Pilo-Gendo	100	45.97	54.03	6.743	44	25	8.013	87		ACh-Gendo vs. Pilo-Gendo	100	60.14	39.86	4.234	56	43	9.413	161
	ANOVA summary										ANOVA summary
	F	24.63									F	39.46
	P value	<0.0001									P value	<0.0001
	P value summary	****									P value summary	****
	Significant diff. among means (P < 0.05)?	Yes									Significant diff. among means (P < 0.05)?	Yes
	R squared	0.4593									R squared	0.4237
	Brown-Forsythe test										Brown-Forsythe test
	F (DFn, DFd)	10.48 (3, 87)									F (DFn, DFd)	3.449 (3, 161)
	P value	<0.0001									P value	0.0181
	P value summary	****									P value summary	*
	Are SDs significantly different (P < 0.05)?	Yes									Are SDs significantly different (P < 0.05)?	Yes
	Bartlett's test										Bartlett's test
	Bartlett's statistic (corrected)	39.15									Bartlett's statistic (corrected)	13.81
	P value	<0.0001									P value	0.0032
	P value summary	****									P value summary	**
	Are SDs significantly different (P < 0.05)?	Yes									Are SDs significantly different (P < 0.05)?	Yes
	ANOVA table	SS	DF	MS	F (DFn, DFd)	P value					ANOVA table	SS	DF	MS	F (DFn, DFd)	P value
	Treatment (between columns)	53553	3	17851	F (3, 87) = 24.63	P<0.0001					Treatment (between columns)	51628	3	17209	F (3, 161) = 39.46	P<0.0001
	Residual (within columns)	63054	87	724.8							Residual (within columns)	70213	161	436.1
	Total	116607	90								Total	121841	164
	Data summary										Data summary
	Number of treatments (columns)	4									Number of treatments (columns)	4
	Number of values (total)	91									Number of values (total)	165
