# Supplementary material for: Ligand-specific activation trajectories dictate GPCR signalling in cells
Source: Nature. 2026 Jan 14;650(8103):1053–62. doi: 10.1038/s41586-025-09963-3 (PMC12935549; doi:10.1038/s41586-025-09963-3)
Supplement: Supplementary file 8 — Source Data Fig. 1 [file 41586_2025_9963_MOESM8_ESM.xlsx]

## Sheet: Fig 1c
Time (s)	T84		Time (s)	E175		Time (s)	F181		Time (s)	F188		Time (s)	A414		Time (s)	P415		Time (s)	N419
0	-1.11228		0	-0.246096		0	0.717781		0	-0.702657		0	-0.355371		0	0.268858		0	0.0995958
0.1	0.777805		0.1	0.323762		0.1	0.599121		0.1	0.456784		0.1	0.726317		0.1	0.0491903		0.1	0.385079
0.2	-0.089211		0.2	0.294887		0.2	-1.07591		0.2	-0.990416		0.2	1.24063		0.2	0.497609		0.2	0.931592
0.3	-0.700483		0.3	-0.085534		0.3	0.285011		0.3	0.524684		0.3	-0.790295		0.3	-0.177272		0.3	0.155537
0.4	0.928941		0.4	-0.236753		0.4	0.534073		0.4	-0.71554		0.4	0.646516		0.4	1.19002		0.4	0.0539721
0.5	-0.667636		0.5	-0.340484		0.5	-0.141035		0.5	0.916962		0.5	0.584713		0.5	0.0746843		0.5	-0.368623
0.6	-0.0447365		0.6	0.0494635		0.6	-0.423162		0.6	-1.63849		0.6	-0.850762		0.6	1.56261		0.6	-0.0902992
0.7	-0.408043		0.7	0.291539		0.7	0.303565		0.7	0.00269697		0.7	-0.512511		0.7	-0.13894		0.7	-1.37054
0.8	1.34382		0.8	-0.0840626		0.8	-2.22545		0.8	-1.71366		0.8	-0.535925		0.8	-0.258083		0.8	0.172312
0.9	-0.028175		0.9	0.0332785		0.9	1.42601		0.9	-0.196928		0.9	-0.153316		0.9	-0.318869		0.9	0.0313779
1	0.0362642		1	0.388944		1	-1.36592		1	-0.500463		1	-1.69392		1	0.140945		1	0.623467
1.1	1.64893		1.1	0.288192		1.1	-0.286924		1.1	-1.44851		1.1	-1.27377		1.1	0.89936		1.1	-0.480444
1.2	1.15209		1.2	0.00307883		1.2	-0.297298		1.2	-2.52794		1.2	-0.838095		1.2	-1.32791		1.2	-0.411042
1.3	0.24555		1.3	0.315596		1.3	0.681162		1.3	-0.814297		1.3	-1.17392		1.3	-0.444425		1.3	0.473782
1.4	0.929802		1.4	0.236179		1.4	0.201363		1.4	-0.215517		1.4	-1.37841		1.4	-0.210613		1.4	-0.287365
1.5	0.16472		1.5	0.473326		1.5	-2.342		1.5	-1.72745		1.5	-1.66267		1.5	0.970464		1.5	0.224882
1.6	1.61614		1.6	-0.28906		1.6	-0.883737		1.6	0.326356		1.6	-0.421416		1.6	-0.296407		1.6	-0.470354
1.7	-0.697785		1.7	0.172911		1.7	-1.19947		1.7	-1.38609		1.7	-1.34111		1.7	0.460596		1.7	-0.737607
1.8	0.837623		1.8	0.38041		1.8	-0.655897		1.8	0.158645		1.8	-1.07674		1.8	-0.385751		1.8	-0.686033
1.9	2.03552		1.9	0.0770884		1.9	1.46304		1.9	-1.95768		1.9	0.121291		1.9	0.837765		1.9	0.441497
2	-1.33422		2	0.121781		2	1.51768		2	-0.729612		2	-0.964758		2	0.407423		2	-0.2998
2.1	0.883596		2.1	0.466705		2.1	0.179782		2.1	-2.30995		2.1	-0.77622		2.1	-2.02667		2.1	1.43012
2.2	0.925885		2.2	0.155917		2.2	-0.653333		2.2	1.02267		2.2	-0.595739		2.2	-1.08836		2.2	0.38148
2.3	0.431805		2.3	0.307614		2.3	-0.585917		2.3	1.80883		2.3	-0.415332		2.3	-0.789186		2.3	-1.08129
2.4	-0.353115		2.4	0.177215		2.4	1.08093		2.4	0.426371		2.4	-0.365844		2.4	0.58986		2.4	0.321757
2.5	0.414198		2.5	0.271014		2.5	0.88573		2.5	0.272406		2.5	-0.275204		2.5	-0.280363		2.5	0.457814
2.6	0.40374		2.6	0.413847		2.6	-0.21656		2.6	0.869045		2.6	-0.97994		2.6	0.960873		2.6	-0.288361
2.7	-0.00468157		2.7	0.488261		2.7	0.547315		2.7	0.709346		2.7	0.401403		2.7	-0.250458		2.7	-0.441489
2.8	-0.0880621		2.8	-0.22101		2.8	-0.863737		2.8	-1.38024		2.8	0.314741		2.8	1.26976		2.8	-0.999849
2.9	-0.0129779		2.9	0.614724		2.9	0.376734		2.9	0.0523796		2.9	-0.599156		2.9	0.356123		2.9	-0.694619
3	1.94707		3	0.586364		3	-2.15784		3	-3.18352		3	-1.53639		3	-0.222393		3	-0.436738
3.1	-1.32047		3.1	0.233752		3.1	-1.86459		3.1	-1.38753		3.1	-0.705383		3.1	0.313177		3.1	0.248566
3.2	-2.14584		3.2	0.566464		3.2	-0.742801		3.2	-1.38275		3.2	-0.955176		3.2	1.16237		3.2	-0.634613
3.3	-0.579898		3.3	0.547704		3.3	0.897969		3.3	-2.85723		3.3	-0.566178		3.3	2.07874		3.3	-0.19063
3.4	1.79258		3.4	0.194797		3.4	-0.643362		3.4	-5.32691		3.4	-2.36809		3.4	0.163731		3.4	-0.398953
3.5	2.42149		3.5	-0.242197		3.5	-1.61691		3.5	-3.97243		3.5	-2.12197		3.5	1.48729		3.5	0.275088
3.6	0.494303		3.6	0.118728		3.6	0.551795		3.6	-3.552		3.6	-1.28762		3.6	1.07435		3.6	-0.809577
3.7	1.39442		3.7	0.812623		3.7	0.033288		3.7	-4.38143		3.7	-0.28105		3.7	2.44489		3.7	-0.657379
3.8	0.541359		3.8	0.656768		3.8	-0.210741		3.8	-2.65883		3.8	-0.910287		3.8	1.45085		3.8	-0.645367
3.9	0.19408		3.9	1.19154		3.9	0.953978		3.9	-4.74065		3.9	-1.29005		3.9	2.15186		3.9	1.04418
4	0.985932		4	0.684025		4	-2.58925		4	-3.68606		4	-1.34063		4	1.2242		4	-0.61965
4.1	0.428884		4.1	0.118323		4.1	-1.20235		4.1	-4.73652		4.1	-1.11308		4.1	2.19653		4.1	-0.791965
4.2	0.315895		4.2	0.56444		4.2	-0.505236		4.2	-4.0726		4.2	-1.98699		4.2	1.82834		4.2	-0.047985
4.3	0.750121		4.3	0.518387		4.3	0.212716		4.3	-6.41286		4.3	-0.546358		4.3	-0.623119		4.3	-0.0126819
4.4	-0.516246		4.4	0.326999		4.4	-0.477494		4.4	-4.96389		4.4	-0.0256944		4.4	0.557008		4.4	-0.45804
4.5	0.524726		4.5	0.20083		4.5	-0.161194		4.5	-5.23798		4.5	-0.200973		4.5	1.13899		4.5	-1.64732
4.6	0.14701		4.6	0.616196		4.6	-1.30881		4.6	-6.3273		4.6	-0.937993		4.6	2.16363		4.6	-0.73347
4.7	1.75081		4.7	0.492049		4.7	-1.53602		4.7	-5.42666		4.7	-1.16405		4.7	1.54245		4.7	-0.787067
4.8	-0.0649833		4.8	0.978556		4.8	-1.15038		4.8	-5.924		4.8	0.495446		4.8	2.6973		4.8	-0.292866
4.9	-1.05131		4.9	3.21547		4.9	-3.49057		4.9	-5.98654		4.9	-0.544781		4.9	1.63936		4.9	-1.24167
5	0.746191		5	4.95764		5	-3.09594		5	-8.34281		5	0.685469		5	2.70741		5	-1.02965
5.1	1.22807		5.1	5.22598		5.1	-2.86244		5.1	-7.00419		5.1	-1.53905		5.1	1.91204		5.1	-1.58708
5.2	-0.0342162		5.2	6.36654		5.2	-2.60027		5.2	-8.6292		5.2	-1.58156		5.2	-0.60242		5.2	-0.594453
5.3	0.760841		5.3	6.53074		5.3	-5.66335		5.3	-5.75986		5.3	-1.89114		5.3	0.286516		5.3	-1.14623
5.4	1.86266		5.4	7.98997		5.4	-3.94352		5.4	-5.36938		5.4	-0.904661		5.4	1.12663		5.4	-0.605767
5.5	-0.173077		5.5	8.23487		5.5	-2.97755		5.5	-6.92277		5.5	-0.954068		5.5	2.62116		5.5	-1.68927
5.6	0.612967		5.6	8.35424		5.6	-5.88929		5.6	-8.77201		5.6	0.420774		5.6	1.15981		5.6	-1.49101
5.7	-0.274817		5.7	9.10316		5.7	-4.78485		5.7	-7.74868		5.7	-1.05891		5.7	2.65515		5.7	1.08706
5.8	-0.539096		5.8	9.28609		5.8	-5.98092		5.8	-7.49673		5.8	0.335275		5.8	1.42911		5.8	1.17323
5.9	0.216201		5.9	9.45706		5.9	-4.06657		5.9	-8.31051		5.9	-0.721502		5.9	3.04781		5.9	-0.979737
6	-0.704805		6	9.80489		6	-6.74968		6	-6.19568		6	-0.716778		6	1.64965		6	-0.641772
6.1	1.17604		6.1	9.94942		6.1	-5.11842		6.1	-8.10629		6.1	0.374525		6.1	2.10793		6.1	0.713286
6.2	0.13949		6.2	10.1159		6.2	-6.01935		6.2	-6.66269		6.2	-0.334676		6.2	1.31206		6.2	-0.767278
6.3	-0.181856		6.3	10.5901		6.3	-3.51728		6.3	-8.67122		6.3	-2.00618		6.3	1.8569		6.3	-0.682661
6.4	-1.55455		6.4	10.1656		6.4	-7.30255		6.4	-7.51217		6.4	-1.36999		6.4	2.28147		6.4	-0.665281
6.5	0.639251		6.5	10.5657		6.5	-5.01547		6.5	-8.54672		6.5	-0.319807		6.5	-0.14195		6.5	0.117978
6.6	0.337125		6.6	10.2319		6.6	-4.5501		6.6	-6.86914		6.6	-0.465679		6.6	0.906491		6.6	-0.916034
6.7	-0.425484		6.7	10.2604		6.7	-6.15501		6.7	-7.31306		6.7	-1.27678		6.7	1.01579		6.7	0.0742614
6.8	-0.149775		6.8	9.93481		6.8	-5.86061		6.8	-8.75832		6.8	-0.918899		6.8	1.99006		6.8	-2.17151
6.9	-0.0928281		6.9	10.0614		6.9	-6.37374		6.9	-9.24944		6.9	-1.57755		6.9	1.24684		6.9	-5.4622
7	0.497411		7	10.3753		7	-6.14791		7	-8.1803		7	-1.11534		7	2.36355		7	-6.69849
7.1	-0.496936		7.1	9.89954		7.1	-8.63265		7.1	-7.28653		7.1	-3.17758		7.1	2.14618		7.1	-10.4659
7.2	1.54463		7.2	10.4634		7.2	-8.21124		7.2	-7.46133		7.2	-11.0086		7.2	2.43829		7.2	-9.80536
7.3	-0.130731		7.3	10.1886		7.3	-5.00614		7.3	-6.62196		7.3	-13.056		7.3	-1.76148		7.3	-11.9068
7.4	0.8006		7.4	9.90851		7.4	-6.35384		7.4	-9.1846		7.4	-15.537		7.4	-8.45612		7.4	-13.0095
7.5	0.823277		7.5	10.5745		7.5	-6.4406		7.5	-8.30785		7.5	-14.986		7.5	-12.2166		7.5	-12.8672
7.6	4.70514		7.6	10.1222		7.6	-7.51065		7.6	-9.80041		7.6	-16.1147		7.6	-14.99		7.6	-15.2654
7.7	7.89844		7.7	10.8465		7.7	-7.48722		7.7	-9.80825		7.7	-16.3554		7.7	-14.3577		7.7	-14.0702
7.8	9.90953		7.8	10.6958		7.8	-6.39055		7.8	-9.46962		7.8	-15.7114		7.8	-15.3087		7.8	-14.8721
7.9	8.69515		7.9	10.0284		7.9	-5.94546		7.9	-8.10487		7.9	-16.2303		7.9	-14.6692		7.9	-14.6999
8	7.43586		8	10.7349		8	-7.64428		8	-7.973		8	-15.4779		8	-15.7268		8	-13.7649
8.1	10.3805		8.1	10.0296		8.1	-4.28499		8.1	-8.35655		8.1	-16.046		8.1	-14.411		8.1	-15.0118
8.2	10.2838		8.2	10.234		8.2	-7.74706		8.2	-8.52928		8.2	-15.3634		8.2	-15.3856		8.2	-14.5088
8.3	9.49353		8.3	10.6895		8.3	-7.32412		8.3	-9.30056		8.3	-15.7882		8.3	-15.4389		8.3	-15.1943
8.4	11.8903		8.4	10.1941		8.4	-8.44584		8.4	-8.43794		8.4	-16.1195		8.4	-15.6366		8.4	-14.711
8.5	11.0029		8.5	10.1873		8.5	-8.03772		8.5	-10.1116		8.5	-15.8668		8.5	-15.8494		8.5	-15.0373
8.6	8.57818		8.6	10.1955		8.6	-6.12104		8.6	-9.96018		8.6	-15.7531		8.6	-15.8041		8.6	-15.1766
8.7	10.9726		8.7	10.3188		8.7	-7.35897		8.7	-10.9664		8.7	-15.2086		8.7	-17.926		8.7	-15.7316
8.8	11.2362		8.8	10.0743		8.8	-7.42945		8.8	-9.72536		8.8	-15.2749		8.8	-16.6869		8.8	-15.1507
8.9	10.2246		8.9	10.5657		8.9	-6.31635		8.9	-8.10602		8.9	-14.7338		8.9	-16.3015		8.9	-14.5681
9	10.032		9	9.84959		9	-7.17681		9	-6.7936		9	-15.8936		9	-15.0747		9	-14.7342
9.1	10.8378		9.1	10.0543		9.1	-8.07328		9.1	-6.97759		9.1	-15.1409		9.1	-15.9049		9.1	-15.2735
9.2	11.2132		9.2	10.2454		9.2	-7.32384		9.2	-8.10451		9.2	-16.8017		9.2	-15.3542		9.2	-15.4151
9.3	10.6741		9.3	9.85345		9.3	-5.79763		9.3	-9.69755		9.3	-16.9143		9.3	-16.0179		9.3	-14.6628
9.4	8.17379		9.4	10.0181		9.4	-8.25069		9.4	-12.5633		9.4	-15.3136		9.4	-15.0318		9.4	-15.2966
9.5	10.1367		9.5	10.3859		9.5	-6.40699		9.5	-11.0019		9.5	-15.9038		9.5	-15.3839		9.5	-16.1289
9.6	9.84281		9.6	10.1248		9.6	-5.89067		9.6	-11.0397		9.6	-16.0119		9.6	-17.65		9.6	-16.6198
9.7	9.42844		9.7	9.77101		9.7	-6.83831		9.7	-8.78106		9.7	-15.2573		9.7	-16.8998		9.7	-14.7206
9.8	8.66419		9.8	9.97461		9.8	-8.47792		9.8	-9.1863		9.8	-15.7677		9.8	-16.5957		9.8	-15.5466
9.9	10.0342		9.9	10.1293		9.9	-6.66054		9.9	-8.25149		9.9	-16.129		9.9	-15.4856		9.9	-15.9177
10	10.9523		10	9.8924		10	-7.29902		10	-10.3873		10	-16.8725		10	-16.0734		10	-15.2381
10.1	10.7372		10.1	9.85407		10.1	-7.54118		10.1	-9.42315		10.1	-15.7844		10.1	-15.3329		10.1	-15.8522
10.2	9.57473		10.2	9.91355		10.2	-7.90243		10.2	-9.99504		10.2	-16.5521		10.2	-16.3728		10.2	-15.7156
10.3	9.46199		10.3	10.1668		10.3	-6.27675		10.3	-11.5579		10.3	-16.329		10.3	-15.3259		10.3	-15.9215
10.4	9.92108		10.4	9.96476		10.4	-7.24283		10.4	-10.6412		10.4	-16.0051		10.4	-16.2139		10.4	-16.42
10.5	10.6641		10.5	9.97108		10.5	-8.48641		10.5	-10.0724					10.5	-17.0451		10.5	-15.3562
10.6	8.84492		10.6	10.0459		10.6	-6.622		10.6	-8.83384		10.6	-17.2451		10.6	-16.777		10.6	-16.045
10.7	9.3279		10.7	9.7819		10.7	-7.59645		10.7	-9.87813					10.7	-16.4871		10.7	-15.6005
10.8	9.59401		10.8	9.71709		10.8	-6.84632		10.8	-8.47847		10.8	-15.5662		10.8	-15.4611		10.8	-14.9396
10.9	9.74511		10.9	9.73603		10.9	-8.19926		10.9	-10.6241					10.9	-16.9231		10.9	-15.9641
11	10.9001		11	9.59537		11	-7.37726		11	-8.29887		11	-16.0686		11	-15.8267		11	-15.5497
11.1	10.4487		11.1	9.71157		11.1	-8.08767		11.1	-10.2771					11.1	-16.3633		11.1	-15.2537
11.2	9.81057		11.2	9.9023		11.2	-7.13121		11.2	-7.79568		11.2	-16.7694		11.2	-15.446		11.2	-14.9253
11.3	9.96119		11.3	9.89969		11.3	-7.20208		11.3	-8.97903					11.3	-16.5165		11.3	-15.3512
11.4	9.00616		11.4	10.4619		11.4	-6.23034		11.4	-7.41904		11.4	-15.284		11.4	-15.8925		11.4	-15.5522
11.5	10.2487		11.5	9.87217		11.5	-8.27626		11.5	-8.21277					11.5	-16.3786		11.5	-13.4368
11.6	8.87637		11.6	9.71672		11.6	-7.29515		11.6	-9.99366		11.6	-14.8904		11.6	-15.7556		11.6	-12.4725
11.7	8.39737		11.7	9.63973		11.7	-8.62045		11.7	-11.2324					11.7	-15.859		11.7	-10.0763
11.8	11.1539		11.8	9.90634		11.8	-6.90612		11.8	-10.7401		11.8	-16.3486		11.8	-17.9491		11.8	-10.3619
11.9	9.98403		11.9	9.88942		11.9	-7.87738		11.9	-10.515		11.9	-16.4208		11.9	-17.0762		11.9	-11.3201
12	11.188		12	9.56403		12	-7.20972		12	-10.5726		12	-16.8379		12	-16.7006		12	-8.41874
12.1	9.34606		12.1	9.17835		12.1	-7.55679		12.1	-11.5053		12.1	-15.8917		12.1	-15.6983		12.1	-7.13096
12.2	9.3728		12.2	9.60475		12.2	-8.77843		12.2	-11.2818		12.2	-15.9554		12.2	-16.4515		12.2	-6.97059
12.3	8.64976		12.3	9.69947		12.3	-6.61533		12.3	-9.96066					12.3	-15.6625		12.3	-5.10627
12.4	8.97205		12.4	9.85209		12.4	-8.97115		12.4	-9.80703		12.4	-16.7264		12.4	-16.405		12.4	-4.62775
12.5	9.144		12.5	9.60828		12.5	-8.39965		12.5	-10.4628					12.5	-15.1786		12.5	-2.8615
12.6	9.09207		12.6	9.78507		12.6	-6.78268		12.6	-10.2067		12.6	-16.5238		12.6	-15.9722		12.6	-2.0868
12.7	7.50299		12.7	9.47465		12.7	-7.84271		12.7	-10.4739		12.7	-15.8186		12.7	-17.3073		12.7	-1.08892
12.8	8.05218		12.8	9.64006		12.8	-9.70805		12.8	-9.94199					12.8	-17.075		12.8	-1.61842
12.9	4.8192		12.9	9.59471		12.9	-8.93616		12.9	-10.4526		12.9	-15.9461		12.9	-16.9415		12.9	0.463224
13	3.28617		13	9.39265		13	-8.77645		13	-12.5577		13	-15.9161		13	-15.7708		13	-1.61549
13.1	1.89974		13.1	9.86437		13.1	-9.23699		13.1	-12.0787		13.1	-15.4303		13.1	-16.8797		13.1	0.491382
13.2	1.38709		13.2	9.27829		13.2	-7.59686		13.2	-11.5751		13.2	-15.9488		13.2	-15.282		13.2	-0.701752
13.3	1.13997		13.3	9.28344		13.3	-8.2895		13.3	-9.64418		13.3	-15.2559		13.3	-15.3774		13.3	-1.0302
13.4	0.382137		13.4	9.21043		13.4	-8.57576		13.4	-10.2461		13.4	-15.1828		13.4	-13.7376		13.4	-0.456718
13.5	1.99859		13.5	9.4464		13.5	-7.561		13.5	-9.66867		13.5	-15.4845		13.5	-14.492		13.5	-0.151677
13.6	1.13329		13.6	9.57764		13.6	-8.08102		13.6	-10.6552		13.6	-15.4865		13.6	-13.409		13.6	-1.33866
13.7	0.844326		13.7	9.40538		13.7	-9.06937		13.7	-9.20204		13.7	-14.3924		13.7	-13.6052		13.7	0.540165
13.8	2.83701		13.8	9.51319		13.8	-8.49002		13.8	-10.3748		13.8	-13.2638		13.8	-12.1397		13.8	-0.300267
13.9	0.254227		13.9	9.30069		13.9	-8.0687		13.9	-11.6488		13.9	-12.2443		13.9	-11.2911		13.9	-0.247206
14	0.505459		14	9.04585		14	-6.86713		14	-11.699		14	-8.97436		14	-13.0017		14	-0.5968
14.1	1.70656		14.1	9.26542		14.1	-7.41508		14.1	-11.6258		14.1	-8.03819		14.1	-11.7487		14.1	1.38698
14.2	-0.757798		14.2	8.96217		14.2	-6.89221		14.2	-9.8749		14.2	-5.43824		14.2	-10.9284		14.2	-0.918591
14.3	-0.462234		14.3	9.28421		14.3	-6.33275		14.3	-11.1485		14.3	-5.15109		14.3	-9.83562		14.3	0.858497
14.4	-0.74403		14.4	9.52037		14.4	-6.23542		14.4	-10.2989		14.4	-3.56518		14.4	-10.0193		14.4	0.968078
14.5	-1.10911		14.5	8.89246		14.5	-6.70805		14.5	-12.3966		14.5	-3.16955		14.5	-8.35051		14.5	0.479001
14.6	-0.495663		14.6	8.70494		14.6	-5.40039		14.6	-11.5013		14.6	-2.87998		14.6	-8.66608		14.6	-0.640078
14.7	-0.875666		14.7	8.75279		14.7	-6.97446		14.7	-11.9445		14.7	-3.77857		14.7	-6.88934		14.7	0.189375
14.8	-2.09374		14.8	9.15186		14.8	-5.1329		14.8	-10.8963		14.8	-2.22226		14.8	-7.03876		14.8	0.710349
14.9	-0.154238		14.9	9.16794		14.9	-5.72787		14.9	-10.7026		14.9	-2.92357		14.9	-8.57164		14.9	1.49855
15	-0.000285075		15	9.12314		15	-6.00161		15	-9.84547		15	-3.07943		15	-7.4468		15	0.468703
15.1	1.289		15.1	8.91012		15.1	-6.19242		15.1	-10.0609		15.1	-2.15873		15.1	-6.51078		15.1	0.740496
15.2	-0.212145		15.2	9.11214		15.2	-4.18285		15.2	-12.4287		15.2	-1.83466		15.2	-4.65774		15.2	1.50469
15.3	-2.64621		15.3	8.43193		15.3	-4.67351		15.3	-11.6034		15.3	-1.52691		15.3	-5.36155		15.3	0.863948
15.4	0.469273		15.4	9.0503		15.4	-4.76895		15.4	-11.419		15.4	-1.71931		15.4	-3.46265		15.4	2.32871
15.5	0.0681653		15.5	9.64462		15.5	-3.67736		15.5	-9.92141					15.5	-4.03112		15.5	-0.148268
15.6	-0.671759		15.6	9.14315		15.6	-4.275		15.6	-11.377		15.6	-1.65526		15.6	-2.10564		15.6	0.707718
15.7	-1.97061		15.7	8.86054		15.7	-3.12969		15.7	-10.8583					15.7	-2.93555		15.7	1.00242
15.8	-0.990199		15.8	8.94955		15.8	-2.09163		15.8	-11.8543		15.8	-0.584123		15.8	-2.20931		15.8	3.32363
15.9	-0.146317		15.9	9.16639		15.9	-2.44535		15.9	-10.4904		15.9	-2.39958		15.9	-2.61617		15.9	1.6617
16	-0.393662		16	8.86752		16	-3.19805		16	-10.235		16	-0.614538		16	-1.65446		16	3.06503
16.1	2.94789		16.1	8.76596		16.1	-3.99053		16.1	-11.2196		16.1	-0.16545		16.1	-1.11233		16.1	0.401091
16.2	-0.472757		16.2	8.8214		16.2	-2.3885		16.2	-11.9796					16.2	-3.29579		16.2	1.9099
16.3	-1.22457		16.3	9.43709		16.3	-1.72096		16.3	-12.3352		16.3	-0.373259		16.3	-1.79445		16.3	0.901113
16.4	-0.0583759		16.4	8.17988		16.4	-1.19422		16.4	-11.1493					16.4	-1.51673		16.4	1.46471
16.5	-1.94048		16.5	8.90707		16.5	-1.92802		16.5	-11.4147		16.5	-0.734408		16.5	-0.228906		16.5	1.55702
16.6	-1.21788		16.6	8.27725		16.6	-3.19155		16.6	-11.2017		16.6	-1.43572		16.6	-0.636776		16.6	2.37867
16.7	-0.38016		16.7	8.96629		16.7	-0.330276		16.7	-11.2455		16.7	-1.06999		16.7	0.588331		16.7	1.19607
16.8	-2.07309		16.8	8.39672		16.8	-1.5101		16.8	-10.3025					16.8	-0.409357		16.8	2.2312
16.9	-2.27296		16.9	8.37583		16.9	0.655565		16.9	-11.0049		16.9	0.0399215		16.9	0.888283		16.9	1.72073
17	-0.583315		17	7.85471		17	-2.15986		17	-11.455					17	0.178218		17	1.77419
17.1	-1.18465		17.1	7.85019		17.1	-0.89242		17.1	-13.7999		17.1	-0.532992		17.1	-1.84401		17.1	-0.274466
17.2	-1.24632		17.2	8.00597		17.2	-2.8855		17.2	-13.5588		17.2	-0.568444		17.2	-0.69593		17.2	1.58285
17.3	-1.18667		17.3	7.58703		17.3	-2.52725		17.3	-10.8056		17.3	-1.36146		17.3	0.225429		17.3	0.713369
17.4	-0.531968		17.4	7.42323		17.4	-2.5817		17.4	-11.5203					17.4	1.49751		17.4	0.876969
17.5	-0.104129		17.5	7.53197		17.5	-1.37941		17.5	-10.5428		17.5	-2.17399		17.5	0.0769598		17.5	1.19711
17.6	-1.40257		17.6	6.87416		17.6	-0.684998		17.6	-12.8454		17.6	-0.879209		17.6	1.71208		17.6	0.942908
17.7	0.202924		17.7	7.0032		17.7	0.966124		17.7	-14.4278		17.7	-0.578143		17.7	0.478791		17.7	0.764864
17.8	-0.362128		17.8	6.94968		17.8	-2.15245		17.8	-13.7537		17.8	-0.337031		17.8	2.34084		17.8	0.535408
17.9	-1.14631		17.9	6.94787		17.9	0.514934		17.9	-11.7152					17.9	0.975552		17.9	1.47375
18	-2.19754		18	6.73835		18	-2.4702		18	-11.7895		18	-1.0791		18	1.20352		18	1.01096
18.1	-0.685846		18.1	6.22852		18.1	-2.0725		18.1	-9.8703		18.1	-0.858638		18.1	0.599594		18.1	1.04744
18.2	0.0863888		18.2	5.93661		18.2	-0.796434		18.2	-9.6053		18.2	-1.3304		18.2	1.20319		18.2	0.885029
18.3	0.405236		18.3	5.98295		18.3	-0.477725		18.3	-9.30298		18.3	-1.25705		18.3	1.3865		18.3	0.0909253
18.4	-3.38069		18.4	5.75221		18.4	-0.580611		18.4	-10.8853		18.4	-0.651814		18.4	-1.01423		18.4	0.446951
18.5	-0.819051		18.5	5.79495		18.5	-1.29472		18.5	-12.3636		18.5	-1.19751		18.5	-0.145035		18.5	0.340553
18.6	-0.185053		18.6	5.38908		18.6	-0.463009		18.6	-11.55					18.6	0.259287		18.6	0.270757
18.7	0.0698806		18.7	5.17124		18.7	0.403837		18.7	-10.8539					18.7	1.86896		18.7	-0.160596
18.8	0.243647		18.8	5.06574		18.8	-0.40123		18.8	-8.83495					18.8	1.10531		18.8	0.206578
18.9	-0.0827599		18.9	5.00369		18.9	-1.84378		18.9	-9.50121					18.9	2.24173		18.9	-0.251115
19	-0.480072		19	4.07916		19	-0.526497		19	-7.84879					19	1.02696		19	-0.132744
19.1	0.639068		19.1	4.25219		19.1	-1.21981		19.1	-8.6306					19.1	2.00139		19.1	0.19668
19.2	-0.646101		19.2	4.07585		19.2	-1.39076		19.2	-6.88212					19.2	1.19422		19.2	-0.681803
19.3	-1.01483		19.3	4.538		19.3	-0.963622		19.3	-7.80583					19.3	-0.669602		19.3	-0.168744
19.4	-1.57556		19.4	4.04682		19.4	-1.63372		19.4	-6.54065					19.4	0.422064		19.4	0.560977
19.5	-1.11592		19.5	3.65677		19.5	0.954746		19.5	-7.59549					19.5	1.3024		19.5	-0.359313
19.6	0.730497		19.6	3.16787		19.6	0.29286		19.6	-6.30197					19.6	2.58708
19.7	-1.15333		19.7	3.50264		19.7	-0.705114		19.7	-6.28841					19.7	0.956797
19.8	1.05325		19.8	3.19498		19.8	-0.449003		19.8	-7.15425					19.8	2.4114
19.9	-1.09733		19.9	3.26737		19.9	-2.12575		19.9	-6.10529					19.9	1.20208
20	-1.09226		20	2.799		20	1.00239		20	-5.81818					20	2.9032
20.1	-0.73502		20.1	2.7837					20.1	-5.78327					20.1	1.75597
20.2	0.30348		20.2	2.76295					20.2	-4.63971					20.2	1.22689
20.3	1.04056		20.3	2.23271					20.3	-5.2203
			20.4	2.79113					20.4	-3.92286
			20.5	2.1882					20.5	-2.26144
			20.6	2.26905					20.6	-2.91059
			20.7	1.34459					20.7	-3.37892
			20.8	1.78883					20.8	-1.48651
			20.9	1.92012					20.9	-2.93137
			21	1.60955					21	-1.66718
			21.1	1.56478					21.1	-1.93548
			21.2	1.54599					21.2	-3.44454
			21.3	0.955786					21.3	-2.13421
			21.4	1.54293					21.4	-0.414546
			21.5	1.39598					21.5	-0.218032
			21.6	1.04742					21.6	-2.76437
			21.7	0.864304					21.7	-1.42938
			21.8	0.721398					21.8	-3.94495
			21.9	0.69907					21.9	-2.06092
			22	1.10815					22	-1.53447
			22.1	1.01144					22.1	-2.36009
			22.2	0.890531					22.2	-2.3115
			22.3	0.839659					22.3	-0.438585
			22.4	0.869049					22.4	-0.622551
			22.5	0.661587					22.5	-2.12965
			22.6	0.542959					22.6	-1.18575
			22.7	0.25505					22.7	-2.99548
			22.8	0.376327					22.8	-0.803041
			22.9	0.387987					22.9	-0.307586
			23	0.203699					23	-0.60267
			23.1	-0.163958					23.1	-0.511152
			23.2	-0.174368					23.2	0.516039
			23.3	0.301913					23.3	-0.240404
			23.4	-0.102271					23.4	-1.70466
			23.5	-0.0909413					23.5	-0.766483
			23.6	0.497236					23.6	-2.48417
			23.7	0.351608					23.7	-0.189601
			23.8	0.222422					23.8	-2.40359
			23.9	0.827778					23.9	-0.92002
			24	0.450778					24	-2.78591
			24.1	0.209695					24.1	-0.70218
			24.2	0.701645					24.2	-0.466786
			24.3	0.118728					24.3	0.379658
			24.4	-0.23782					24.4	-1.77464
			24.5	0.486936					24.5	0.0223949
			24.6	-0.251614					24.6	-1.22802
			24.7	0.191487					24.7	-2.81322
			24.8	0.153857					24.8	-0.761482
			24.9	-0.0887342					24.9	-1.56899
			25	-0.51451					25	-0.519214
			25.1	-0.131109					25.1	-0.847063
			25.2	-0.250621					25.2	0.293517
			25.3	-0.176538					25.3	-2.03231
			25.4	0.301177					25.4	-0.391357
			25.5	0.182769					25.5	-1.20014
			25.6	-0.334305					25.6	-2.03411
			25.7	-0.348246					25.7	-0.763822
			25.8	0.43165					25.8	0.881171
			25.9	-0.337358					25.9	0.79968
			26	0.385118					26	-1.04592
			26.1	-0.0802739					26.1	-0.179215
			26.2	-0.214021					26.2	-1.96982
			26.3	-0.398272					26.3	0.74195
			26.4	-0.0179249					26.4	-1.33546
			26.5	-0.102639					26.5	-1.73369
			26.6	-0.580059					26.6	-3.82932
			26.7	0.131749					26.7	-1.99748
			26.8	-0.00501367					26.8	-0.914705
			26.9	-0.0518766					26.9	-1.21035
			27	-0.270558					27	-0.21094
			27.1	-0.0583138					27.1	-0.216908
			27.2	-0.10411					27.2	0.272286
			27.3	0.236768					27.3	-0.572678
			27.4	-0.531394					27.4	0.858459
			27.5	0.0433942					27.5	-2.63415
			27.6	-0.325955					27.6	-1.39269
			27.7	-0.0582402					27.7	-1.54067
			27.8	0.0485071					27.8	-3.1508
			27.9	-0.427					27.9	-2.48459
			28	0.0596895					28	-1.01777
			28.1	-0.577962					28.1	-1.76846
			28.2	-0.455435					28.2	-1.36758
			28.3	0.0607195					28.3	-0.19879
			28.4	-0.24731					28.4	-1.18989
			28.5	0.118728					28.5	-0.594281
			28.6	0.443494					28.6	-1.30039
			28.7	-0.676323					28.7	-3.71823
			28.8	-0.22318					28.8	-2.49567
			28.9	-0.408498					28.9	-1.9526
			29	-0.0871525					29	-0.171765
			29.1	-0.274163					29.1	-0.371918
			29.2	-0.0336317					29.2	-0.558991
			29.3	-0.134788					29.3	-3.50028
			29.4	0.0297473
			29.5	0.212159
			29.6	0.215764
			29.7	0.275318
			29.8	0.209989
			29.9	-0.0408781
			30	-0.111908
			30.1	-0.199454
			30.2	-0.356485
			30.3	-0.31102
			30.4	-0.0162328
			30.5	-0.732161

## Sheet: Fig 1d
T84	E175	F181	F188	A414	P415	N419
8.67316	14.1528	-7.12074	-8.22977	-8.75425	-11.3685	-18.8197
6.3236	10.0371	-3.96054	-11.6026	-15.7525	-17.2594	-23.7747
8.48075	16.1702	-4.13594	-10.4209	-12.5603	-14.6588	-15.0585
8.62464	12.8756	-4.27217	-3.2576	-14.5345	-15.7257	-11.9963
9.5079	12.2413	-4.05071	-23.6688	-20.7815	-21.9107	-12.3839
11.1119	7.48521	-4.24052	-6.26759	-19.9829	-20.0772	-16.7659
11.2255	11.912	-4.44773	-7.02034	-19.4011	-23.6475	-16.2849
6.91259	12.7304	-4.24142	-9.65119	-18.7458	-21.1128	-12.1441
11.4388	7.42565	-4.0798	-8.01899	-16.7789	-20.913	-9.19327
10.0948	8.56359	-4.09075	-10.4486	-18.1357	-21.8316	-8.7054
7.70302	7.43434	-3.58651	-7.40957	-15.908	-20.2233	-10.4526
8.5347	6.79936	-4.53869	-9.37967	-18.9874	-11.4241	-11.0676
8.76797	9.41738	-3.74362	-6.42682	-19.0025	-10.0362	-3.44252
9.45446	19.6909	-3.48083	-16.2492	-12.7981	-9.2446	-2.75228
7.05038	12.7737	-1.92634	-15.4593	-17.0021	-9.88175	-2.36147
11.6455	11.8816	-12.7438	-17.3327	-18.8295	-17.0931	-12.2575
9.49812	18.8686	-7.54368	-9.5108	-20.0238	-16.6263	-4.91424
8.9556	12.2853	-7.32969	-15.4435	-24.1232	-15.8701	-6.93424
8.71067	12.8288	-7.48449	-11.6858	-16.2213	-15.3648	-6.73296
6.20146	13.3555	-7.10926	-6.41086	-14.9132	-14.9587	-6.25177
5.54793	10.9919	-6.46175	-14.3141	-12.6129	-20.784	-7.44852
5.40573	6.4671	-6.28839	-11.325	-8.3845	-13.0524	-7.87529
5.67148	5.40375	-7.51023	-9.39664	-18.0774	-13.493	-5.59316
7.05878	9.55053	-7.68921	-2.80398	-18.4482	-19.3124	-12.2575
5.51187	8.11366	-5.57923	-7.43	-15.9384	-16.4303	-5.22053
5.62828	7.23881	-4.37386	-7.1798	-10.7511	-13.2234	-5.6322
8.35774	9.22206	-4.78679	-9.27732	-16.2558	-13.6889	-13.4904
7.56687	7.23478	-5.41976	-9.80267	-15.8009	-5.77651	-19.6892
9.31782	6.88315	-5.30979	-6.00106	-23.9048	-13.854	-13.1847
7.95705	13.0534	-6.20421	-2.4794	-15.4208	-17.5352	-22.2729
11.5129	12.2435	-4.22935	-13.5433	-14.7361	-17.1347	-21.6635
9.87235	11.3263	-2.86327	-14.3244	-14.3739	-19.836	-19.2777
8.57448	3.08939	-5.35701	-12.882	-12.0662	-19.8306	-19.0128
9.80416	4.50299	-5.28115	-21.4081		-19.763	-11.6842
9.52625	5.84007	-4.80557	-19.8342		-19.7226
	10.5458	-4.04122	-11.4242		-20.7001
	13.9351	-4.14811	-15.0922		-20.2617
	13.5718	-4.46858	-4.54324		-19.3563
	8.43736	-4.50513	-2.25005		-17.955
	7.85785	-3.64974	-3.45714		-14.8456
	8.00465	-4.51534	-3.99092		-15.6675
	13.0534	-4.39022	-6.78156		-15.5681
	12.2435	-5.00799	-8.30135		-9.16476
	11.3263	-9.01813	-6.18826		-11.3659
		-8.14104	-3.21952		-14.9937
		-9.51526	-6.21866		-15.8661
		-7.63824	-5.50706		-13.6415
		-5.08148	-2.23501		-16.8731
		-5.59812	-17.0964		-19.9977
		-5.04852	-25.2832		-17.1041
		-5.76129	-22.8098		-8.26543
		-6.24403	-16.5		-14.0125
		-5.78559	-17.6209		-17.2083
		-5.1908	-16.4012		-17.4471
		-5.50533	-16.2561		-16.8671
		-8.86198	-17.8691		-14.4902
		-9.28488	-9.09461
		-8.22825	-12.2526
		-7.79385	-2.80398
		-8.34071	-7.43
		-9.63591	-7.1798
		-7.57574	-9.27732
		-8.69489	-9.80267
		-9.38606	-6.00106
		-8.80885	-2.4794
		-8.39479	-13.5433
		-3.08485	-14.3244
		-1.99641	-12.882
		-4.08709	-21.4081
		-4.30398	-19.8342
		-4.0987	-11.4242
		-4.76525	-15.0922
		-8.18205	-9.52316
		-8.29395	-15.6535
		-5.98104	-11.5269
		-6.35581	-11.7203
			-13.2519
			-10.8346
			-12.7387
			-8.01464
			-12.3011
			-9.82544
			-12.1251
			-6.2965
			-9.02746
			-11.5446
			-14.0294
			-11.5235
			-13.0355
			-13.3234
			-13.7191
			-11.6535
			-12.6144
			-14.503
			-12.2646
			-14.3583
