# Supplementary material for: Ligand-specific activation trajectories dictate GPCR signalling in cells
Source: Nature. 2026 Jan 14;650(8103):1053–62. doi: 10.1038/s41586-025-09963-3 (PMC12935549; doi:10.1038/s41586-025-09963-3)
Supplement: Supplementary file 9 — Source Data Fig. 2 [file 41586_2025_9963_MOESM9_ESM.xlsx]

## Sheet: Fig 2a
Time (s)	E175		Time (s)	F181
0	-1.00084		0	-1.29301
0.1	0.764451		0.1
0.2	1.37871		0.2
0.3	-0.464448		0.3	1.27757
0.4	0.754336		0.4
0.5	-0.811282		0.5
0.6	0.628674		0.6	-1.42305
0.7	-1.12806		0.7
0.8	0.605039		0.8
0.9	-0.726568		0.9	1.43849
1	0.44164		1
1.1	1.42228		1.1
1.2	-1.76498		1.2	-2.60153
1.3	1.19731		1.3
1.4	-1.86749		1.4
1.5	0.730166		1.5	1.20176
1.6	-1.31281		1.6
1.7	0.744999		1.7
1.8	-0.982463		1.8	-1.75069
1.9	0.375162		1.9
2	1.42982		2
2.1	-1.63013		2.1	0.533133
2.2	1.17703		2.2
2.3	-1.01261		2.3
2.4	0.203398		2.4	-1.33715
2.5	-1.49814		2.5
2.6	-0.165904		2.6	0.821876
2.7	-0.70303		2.7	-1.73085
2.8	0.203204		2.8
2.9	1.12505		2.9	1.30959
3	-2.15709		3	-1.97558
3.1	0.112653		3.1
3.2	-2.02389		3.2	-0.255193
3.3	0.360864		3.3	-1.37665
3.4	-1.41158		3.4	2.55376
3.5	1.6134		3.5	-2.01727
3.6	-0.556117		3.6
3.7	1.46571		3.7	1.46919
3.8	2.11935		3.8
3.9	0.225525		3.9	-2.65257
4	2.48846		4	0.506667
4.1	1.33518		4.1
4.2	3.77134		4.2	-0.846203
4.3	2.4355		4.3	1.95301
4.4	4.64776		4.4	-2.35054
4.5	3.27146		4.5	1.73845
4.6	4.32305		4.6	-1.74587
4.7	5.3533		4.7
4.8	3.53869		4.8	0.761515
4.9	6.2997		4.9	-1.20685
5	3.79721		5	2.12625
5.1	6.10328		5.1	-2.69668
5.2	4.50493		5.2
5.3	6.62757		5.3	2.60584
5.4	5.58925		5.4	-1.4497
5.5	6.63287		5.5	1.51141
5.6	7.33247		5.6	-2.07312
5.7	4.65433		5.7
5.8	7.38232		5.8	1.50834
5.9	5.69945		5.9	-1.76155
6	7.54659		6	0.681215
6.1	5.40587		6.1
6.2	7.70615		6.2	-1.56862
6.3	6.1311		6.3	1.369
6.4	7.5765		6.4	-0.834215
6.5	8.98592		6.5	0.308677
6.6	5.61955		6.6
6.7	8.93534		6.7	-3.25555
6.8	5.32144		6.8	0.682782
6.9	8.27756		6.9	-1.64453
7	6.55112		7	-0.319873
7.1	7.86225		7.1
7.2	6.5803		7.2	-1.49659
7.3	7.93238		7.3	0.450812
7.4	9.10564		7.4
7.5	6.45274		7.5	-1.74998
7.6	8.83959		7.6
7.7	7.20657		7.7	1.10848
7.8	9.32113		7.8	-1.19539
7.9	7.00674		7.9	0.863846
8	8.68188		8
8.1	8.35853		8.1	-2.56878
8.2	7.90529		8.2	0.429466
8.3	10.0358		8.3	-2.91561
8.4	6.27893		8.4
8.5	9.55066		8.5	1.29782
8.6	7.01053		8.6	-1.78725
8.7	9.92386		8.7	1.07753
8.8	7.29984		8.8	-2.86296
8.9	9.46259		8.9
9	8.7076		9	1.97259
9.1	8.68966		9.1
9.2	10.4516		9.2	-1.49529
9.3	7.5801		9.3
9.4	9.90664		9.4	0.938446
9.5	8.21633		9.5
9.6	10.1465		9.6	-1.06362
9.7	8.30256		9.7
9.8	10.2695		9.8	0.78387
9.9	10.2051		9.9	-0.494846
10	7.75449		10
10.1	10.6663		10.1	1.31487
10.2	7.86945		10.2	-1.6813
10.3	10.3401		10.3	1.13524
10.4	7.68548		10.4
10.5	10.119		10.5	-1.98086
10.6	8.1093		10.6	1.58015
10.7	10.7802		10.7
10.8	9.63134		10.8	-1.41105
10.9	8.95114		10.9	0.25804
11	11.3434		11	-1.75769
11.1	7.62469		11.1	0.74204
11.2	9.69038		11.2	-1.83304
11.3	8.27834		11.3	0.910704
11.4	9.88325		11.4	-1.811
11.5	7.98792		11.5	0.941001
11.6	10.2033		11.6	-2.32768
11.7	9.9543		11.7	1.66247
11.8	8.46746		11.8	-1.98222
11.9	10.6034		11.9	1.19612
12	7.51201		12	-3.89121
12.1	9.83326		12.1	0.500028
12.2	8.79557		12.2	-1.97843
12.3	10.1488		12.3	0.920396
12.4	8.03499		12.4	-0.656475
12.5	10.1578		12.5	-1.33084
12.6	11.0488		12.6	-2.09414
12.7	8.49684		12.7	0.296684
12.8	10.7697		12.8	-1.43809
12.9	8.45078		12.9	0.92112
13	10.2142		13	-1.42694
13.1	8.75847		13.1	1.2514
13.2	9.8212		13.2	-2.25333
13.3	8.58082		13.3	0.555599
13.4	10.5528		13.4	-2.11732
13.5	11.1767		13.5	0.560775
13.6	7.73951		13.6	-1.45509
13.7	10.5065		13.7	1.1466
13.8	8.03742		13.8	-3.26189
13.9	10.9832		13.9	0.638521
14	8.09009		14	-2.47166
14.1	10.2572		14.1	1.02347
14.2	8.84484		14.2	-1.5019
14.3	10.4178		14.3	1.09013
14.4	11.0094		14.4	-2.36432
14.5	7.84586		14.5	0.304749
14.6	10.4288		14.6	-2.37843
14.7	8.44091		14.7	-0.100742
14.8	10.7244		14.8	-2.2421
14.9	8.14694		14.9	0.989927
15	10.336		15	-2.10639
15.1	8.31058		15.1	1.0353
15.2	10.2401		15.2	-2.80341
15.3	11.1218		15.3	0.887967
15.4	7.83361		15.4	-2.15341
15.5	10.7899		15.5	0.587037
15.6	8.71358		15.6	-1.98834
15.7	10.4163		15.7	0.785169
15.8	8.39423		15.8	-1.05665
15.9	10.412		15.9	0.653661
16	8.10468		16	-2.83688
16.1	10.0173		16.1	0.393557
16.2	10.1358		16.2	-2.24699
16.3	7.72993		16.3	0.415779
16.4	10.4915		16.4	-3.07648
16.5	8.19353		16.5	0.676817
16.6	9.68454		16.6	-2.19238
16.7	7.82768		16.7	0.513355
16.8	9.98999		16.8	-1.86594
16.9	8.82242		16.9	1.48391
17	9.9793		17	-2.69603
17.1	10.6648		17.1	0.337061
17.2	7.87961		17.2	-2.05435
17.3	10.0421		17.3	0.356539
17.4	7.65144		17.4	-2.62972
17.5	10.0173		17.5	-0.553795
17.6	8.19051		17.6	-2.94131
17.7	9.61082		17.7	-1.16853
17.8	7.72254		17.8	-5.08824
17.9	9.04262		17.9	-3.11132
18	9.51944		18	-5.18553
18.1	7.20199		18.1	-1.80686
18.2	9.62463		18.2	-2.58196
18.3	7.87154		18.3	-2.15015
18.4	9.58072		18.4	-5.84281
18.5	7.82729		18.5	-3.25269
18.6	9.25231		18.6	-4.89227
18.7	7.97697		18.7	-1.88517
18.8	8.96267		18.8	-5.47196
18.9	9.97108		18.9	-2.37126
19	6.88283		19	-5.8282
19.1	9.21351		19.1	-4.03617
19.2	7.15341		19.2	-6.54948
19.3	8.42248		19.3	-4.82071
19.4	6.52184		19.4	-6.30696
19.5	8.31214		19.5	-3.41995
19.6	6.46154		19.6	-7.6315
19.7	8.44218		19.7	-2.91794
19.8	8.90563		19.8	-7.2983
19.9	6.34507		19.9	-3.43712
20	8.7786		20	-7.23623
20.1	6.97693		20.1	-3.84992
20.2	8.88895		20.2	-7.01968
20.3	6.62946		20.3	-3.78589
20.4	7.82802		20.4	-7.06683
20.5	6.53035		20.5	-3.96261
20.6	7.26152		20.6	-7.16187
20.7	7.84008		20.7	-3.6863
20.8	6.01584		20.8	-6.74767
20.9	8.49246		20.9	-4.57561
21	6.23249		21	-7.16663
21.1	7.47019		21.1	-4.0682
21.2	6.00937		21.2	-7.00313
21.3	7.94663		21.3	-4.26862
21.4	6.59849		21.4	-7.63628
21.5	6.92918		21.5	-3.55335
21.6	7.98043		21.6	-8.32234
21.7	5.41136		21.7	-5.01398
21.8	7.70848		21.8	-7.88286
21.9	5.63895		21.9	-4.65704
22	7.93812		22	-7.34667
22.1	5.61678		22.1	-5.50104
22.2	7.74486		22.2	-6.88201
22.3	6.59863		22.3	-6.03027
22.4	6.08543		22.4	-7.04789
22.5	7.64667		22.5	-4.95267
22.6	5.67008		22.6	-7.5128
22.7	7.99822		22.7	-3.78581
22.8	5.32922		22.8	-7.50821
22.9	7.49115		22.9	-5.18882
23	5.24859		23	-7.21588
23.1	6.83503		23.1	-5.20578
23.2	6.75357		23.2	-7.18301
23.3	4.33769		23.3	-5.57259
23.4	7.13401		23.4	-7.55202
23.5	4.37528		23.5	-5.03163
23.6	6.08431		23.6	-7.24292
23.7	4.51189		23.7	-5.14983
23.8	6.90593		23.8	-7.95287
23.9	5.32499		23.9	-6.11337
24	6.866		24	-6.88916
24.1	7.05669		24.1	-5.891
24.2	4.21057		24.2	-8.21753
24.3	6.67946		24.3	-5.64901
24.4	4.25599		24.4	-8.78436
24.5	6.31925		24.5	-5.54761
24.6	4.30107		24.6	-7.14153
24.7	6.52321		24.7	-5.79886
24.8	3.93722		24.8	-6.21253
24.9	6.23449		24.9	-5.48699
25	7.07546		25	-6.91676
25.1	3.64928		25.1	-5.45825
25.2	5.90107		25.2	-8.14594
25.3	3.94082		25.3	-5.46405
25.4	5.51237		25.4	-7.9013
25.5	3.70608		25.5	-5.85386
25.6	5.74497		25.6	-8.9867
25.7	3.56865		25.7	-5.58487
25.8	5.62315		25.8	-7.99171
25.9	5.60943		25.9	-6.24581
26	3.0552		26	-8.15784
26.1	6.06048		26.1
26.2	3.0962		26.2	-6.77807
26.3	5.53887		26.3
26.4	3.58148		26.4	-6.8768
26.5	5.59207		26.5
26.6	3.25566		26.6	-4.74281
26.7	5.25244		26.7
26.8	6.05805		26.8	-8.74417
26.9	3.02262		26.9
27	6.19665		27	-4.66761
27.1	3.11881		27.1
27.2	5.18615		27.2	-8.71244
27.3	3.54827		27.3
27.4	5.346		27.4	-4.86809
27.5	4.11657		27.5
27.6	5.46729		27.6	-8.64455
27.7	5.23294		27.7
27.8	2.7926		27.8	-6.39116
27.9	5.08875		27.9
28	3.50611		28	-7.95918
28.1	5.24164		28.1
28.2	2.95478		28.2	-4.67049
28.3	4.62899		28.3
28.4	3.04217		28.4	-7.77919
28.5	4.46875		28.5
28.6	4.55342		28.6	-5.08665
28.7	2.69762		28.7
28.8	5.07712		28.8	-7.11605
28.9	2.83476		28.9
29	4.63181		29	-5.18554
29.1	2.66499		29.1
29.2	4.62928		29.2	-6.27895
29.3	2.28547		29.3
29.4	4.00209		29.4	-3.0641
29.5	4.84802		29.5
29.6	2.0057		29.6	-5.73566
29.7	4.1688		29.7
29.8	2.97759		29.8	-2.79776
29.9	3.90989		29.9
30	2.29228		30	-5.20023
30.1	4.63405		30.1
30.2	2.24307		30.2	-3.01629
30.3	4.03565		30.3
30.4	4.63716		30.4	-5.67929
30.5	1.66752		30.5
30.6	4.57024		30.6	-2.65789
30.7	2.53855		30.7
30.8	4.24291		30.8	-5.1652
30.9	1.9045		30.9
31	4.7513		31	-1.93096
31.1	3.02894		31.1
31.2	3.51617		31.2	-4.05652
31.3	4.81379		31.3
31.4	2.35609		31.4	-1.62151
31.5	3.99475		31.5
31.6	1.72807		31.6	-5.13499
31.7	3.61737		31.7
31.8	1.78132		31.8	-2.32108
31.9	3.41565		31.9
32	3.34159		32	-4.73891
32.1	2.01591		32.1
32.2	4.56382		32.2	-3.38872
32.3	1.4498		32.3
32.4	3.82916		32.4	-4.3835
32.5	2.12903		32.5
32.6	3.44833		32.6	-1.69459
32.7	1.93451		32.7
32.8	3.74085		32.8	-3.74891
32.9	4.24583		32.9
33	1.52095		33	-2.18833
33.1	3.53611		33.1
33.2	1.46478		33.2	-3.75306
33.3	4.12941		33.3
33.4	1.61894		33.4	-1.28925
33.5	3.43934		33.5
33.6	1.27118		33.6	-3.86526
33.7	3.08968		33.7	-0.361697
33.8	3.84078		33.8	-4.1284
33.9	1.62794		33.9	-0.563229
34	2.87254		34	-3.25646
34.1	1.14902		34.1	-0.58682
34.2	3.50567		34.2	-3.23657
34.3	1.64909		34.3	-0.421605
34.4	2.87094		34.4	-3.14075
34.5	1.64049		34.5	-0.76976
34.6	3.50946		34.6	-2.72582
34.7	4.01279		34.7	-0.442605
34.8	0.848242		34.8	-3.81821
34.9	3.84647		34.9	-0.353384
35	0.981587		35	-3.21348
35.1	2.92784		35.1	-0.243517
35.2	1.6932		35.2	-2.53208
35.3	2.59939		35.3	-0.799854
35.4	1.28067		35.4	-2.23603
35.5	2.72874		35.5	0.726954
35.6	3.15028		35.6	-3.21148
35.7	0.301729		35.7	0.0812258
35.8	2.35657		35.8	-4.00665
35.9	0.631349		35.9	0.151901
36	1.85047		36	-3.13158
36.1	0.610924		36.1	-0.472151
36.2	1.93441		36.2	-4.35501
36.3	0.852424		36.3	0.708303
36.4	2.20363		36.4	-3.29189
36.5	3.31256		36.5	0.651336
36.6	0.739503		36.6	-3.05663
36.7	2.25046		36.7	0.162352
36.8	-0.0319261		36.8	-2.39333
36.9	1.74567		36.9	-0.0138725
37	0.128507		37	-2.52932
37.1	1.93086		37.1	-0.274506
37.2	-0.630862		37.2	-3.564
37.3	1.88067		37.3	-1.43487
37.4	2.28504		37.4	-2.62499
37.5	-0.119899		37.5	-0.287605
37.6	2.13302		37.6	-1.99169
37.7	0.196006		37.7	-0.622443
37.8	2.4425		37.8	-1.89255
37.9	0.146597		37.9	0.235377
38	1.72544		38	-3.3819
38.1	0.210644		38.1	-1.66627
38.2	2.11284		38.2	-2.48433
38.3	2.31806		38.3	-0.361237
38.4	0.0185526		38.4	-3.58597
38.5	1.90795		38.5	0.0051196
38.6	0.0156348		38.6	-2.40846
38.7	1.82591		38.7	1.19235
38.8	-0.0642655		38.8	-3.3028
38.9	1.8976		38.9	0.265176
39	0.138184		39	-2.95821
39.1	0.975217		39.1	0.0757312
39.2	1.71139		39.2	-3.2786
39.3	0.0777362		39.3	0.24427
39.4	1.87703		39.4	-2.58725
39.5	0.458077		39.5	0.440489
39.6	1.2796		39.6	-1.36718
39.7	-0.177672		39.7	0.341776
39.8	1.32969		39.8	-2.12364
39.9	0.0412632		39.9	0.814405
40	1.5086		40	-2.90723
40.1	2.22031		40.1	0.132825
40.2	-0.872363		40.2	-3.15261
40.3	1.44246		40.3	0.293799
40.4	0.0660162		40.4	-3.25608
40.5	1.9577		40.5	1.39311
40.6	-0.515705		40.6	-3.31134
40.7	2.41036		40.7	0.959979
40.8	0.151606		40.8	-2.34298
40.9	0.217355		40.9	0.687482
41	1.25202		41	-2.63289
41.1	-1.49746		41.1	0.777782
41.2	0.81172		41.2	-2.25122
41.3	-0.00196954		41.3	0.0566193
41.4	0.65688		41.4	-2.53734
41.5	-0.879949		41.5	-0.0713963
41.6	1.27279		41.6	-3.9901
41.7	-0.491		41.7	-0.777208
41.8	1.16317		41.8	-3.56966
41.9	2.201		41.9	-1.4649
42	-0.897845		42
42.1	1.53364		42.1	-2.25122
42.2	-0.850479		42.2	0.0566193
42.3	1.20733		42.3	-2.53734
42.4	-0.779089		42.4	-0.0713963
42.5	1.29603		42.5	-3.9901
42.6	0.309899		42.6	-0.777208
42.7	-0.293462		42.7	-3.56966
42.8	2.04587		42.8	-1.4649
42.9	-0.479475		42.9	-3.31134
43	1.17353		43	0.959979
43.1	-0.663785		43.1	-2.34298
43.2	1.15359		43.2	0.687482
43.3	-0.150926		43.3	-2.63289
43.4	1.1765
43.5	-0.276004
43.6	0.561807
43.7	1.93499
43.8	-1.14941
43.9	1.63329
44	-0.721948
44.1	1.44577
44.2	-0.692818
44.3	1.17494
44.4	-0.0704903
44.5	0.556214
44.6	1.7712
44.7	-1.29297
44.8	1.01723
44.9	-1.18579
45	0.493626
45.1	-1.80948
45.2	0.712708
45.3	0.644917
45.4	-0.0850795
45.5	2.0396
45.6	-1.18982
45.7	0.998948
45.8	-1.3434
45.9	-0.309851
46	-0.463232
46.1	0.86356
46.2	0.843135
46.3	-1.33703
46.4	1.258
46.5	-1.87819
46.6	0.205538
46.7	-2.04655
46.8	-0.0388803
46.9	-1.32623
47	0.472618
47.1	-0.313255
47.2	-0.838321
47.3	0.687225
47.4	-2.13978
47.5	0.191289
47.6	-1.63134
47.7	0.349485
47.8	-1.22474
47.9	0.733376
48	2.42611
48.1	1.91661
48.2	5.92378
48.3	4.38472
48.4	8.15632
48.5	5.69828
48.6	8.04632
48.7	6.71758
48.8	7.94673
48.9	8.29837
49	6.23298
49.1	8.51133
49.2	6.13893
49.3	8.26837
49.4	6.56838
49.5	8.76567
49.6	6.72235
49.7	8.09087
49.8	8.90558
49.9	6.50808
50	8.52961
50.1	6.47404
50.2	8.39126
50.3	5.6995
50.4	9.4125
50.5	6.6692
50.6	7.89946
50.7	8.9348
50.8	6.58842
50.9	7.89012
51	6.91074
51.1	8.55373
51.2	6.3726
51.3	8.48132
51.4	7.78761
51.5	8.42122
51.6	9.09227
51.7	6.6282
51.8	9.09995
51.9	6.27334
52	8.47549
52.1	6.84334
52.2	8.77972
52.3	7.11441
52.4	7.99555
52.5	9.63256
52.6	6.3476
52.7	8.31063
52.8	6.78226
52.9	8.44986
53	7.00869
53.1	9.46541
53.2	7.17087
53.3	8.05926
53.4	9.64647
53.5	6.12409
53.6	8.35809
53.7	6.46961
53.8	9.08624
53.9	7.20452
54	8.4305
54.1	9.17091
54.2	6.5464
54.3	9.26904
54.4	6.45089
54.5	8.45847
54.6	6.58609
54.7	8.06422
54.8	6.53726
54.9	8.56297
55	8.33314
55.1	6.59562
55.2	8.72735
55.3	5.6958
55.4	8.62109
55.5	6.27295
55.6	8.76455
55.7	6.03787
55.8	8.4024
55.9	8.71626
56	6.45118
56.1	8.65795
56.2	6.14316
56.3	8.68095
56.4	6.11908
56.5	7.97478
56.6	5.94455
56.7	7.35844
56.8	7.54392
56.9	4.54554
57	7.3156
57.1	5.24047
57.2	6.7027
57.3	4.3906
57.4	5.57826
57.5	3.96343
57.6	5.56649
57.7	6.6494
57.8	3.47605
57.9	6.10912
58	3.81861
58.1	5.29105
58.2	2.963
58.3	5.21436
58.4	2.4641
58.5	4.66644
58.6	4.77999
58.7	2.114
58.8	3.9327
58.9	2.34354
59	3.79381
59.1	2.1158
59.2	3.26067
59.3	1.99398
59.4	2.75622
59.5	3.84521
59.6	0.863852
59.7	3.16569
59.8	1.01271
59.9	2.56457
60	-0.00435245
60.1	1.88729
60.2	1.50826
60.3	1.74548
60.4	2.24458
60.5	-0.788426
60.6	1.8176
60.7	0.268077
60.8	1.88544
60.9	-0.363831
61	1.30479
61.1	1.96461
61.2	-1.50179
61.3	1.47572
61.4	-0.939376
61.5	0.848971
61.6	-1.07423
61.7	0.589867
61.8	-1.25197
61.9	0.630911
62	1.51852
62.1	-1.93543
62.2	0.689171
62.3	-0.92785
62.4	0.380365
62.5	-0.452533
62.6	0.801264
62.7	-1.49338
62.8	-0.0781739
62.9	0.699821
63	-1.94632
63.1	-0.0720951
63.2	-2.26252
63.3	0.095681
63.4	-1.68907
63.5	-0.410419
63.6	-1.18258
63.7	-0.204371
63.8	0.749181
63.9	-2.14853
64	0.110416
64.1	-1.41639
64.2	0.0824048
64.3	-1.63037
64.4	0.211374
64.5	-1.51244
64.6	-0.628674
64.7	0.542938
64.8	-1.71698
64.9	0.431768
65	-1.64457

## Sheet: Fig 2b
T84_ACh	T84_Ixo		E175_ACh	E175_Ixo		F181_ACh	F181_Ixo		F188_ACh	F188_Ixo		A414_ACh	A414_Ixo		P415_ACh	P415_Ixo		N419_ACh	N419_Ixo
7.63594	8.52719		6.69032	9.02291		-4.97691	0.0128		-11.7647	-5.49383		-15.706	-17.0659		-12.1306	-19.5026		-9.35662	-9.37561
9.65441	11.3515		4.50248	6.97915		-5.46873	-0.0003		-9.79798	-5.73386		-15.3773	-16.2258		-15.2447	-14.1382		-8.87876	-9.23675
8.33189	8.69326		5.33131	7.65057		-3.63418	7.81e-05		-13.7179	-11.0073		-16.8539	-18.0461		-15.5056	-13.2833		-16.5994	-17.3999
10.5975	12.7949		5.77879	8.95543		-4.55138	0.0734		-10.4494	-9.04808		-16.2742	-17.492		-16.6713	-15.8671		-14.8284	-15.9403
3.60756	4.87868		4.2832	5.92056		-4.19108	0.001093		-15.0541	-9.62584		-8.77664	-9.32821		-14.2676	-14.0699		-15.2933	-16.2793
3.99099	5.15094		7.14807	8.79888		-4.41822	-0.00281		-11.5439	-9.74397		-10.9982	-12.7634		-11.5096	-13.3199		-12.2139	-12.8654
4.9668	6.52247		6.49661	9.17329		-6.98233	-0.0193		-10.615	-9.36108		-9.92286	-11.7662		-12.9512	-14.061		-10.9082	-12.7444
5.13576	7.3959		3.98595	5.29283		-7.16026	0.0005		-8.05711	-7.50839		-10.4024	-12.3229		-12.9147	-15.7176		-9.84527	-11.3206
3.58958	4.39011		11.5096	13.3199		-6.39793	0.010294		-3.80171	-4.83409		-8.81944	-10.2596		-11.4529	-11.6611		-15.0217	-17.836
3.76661	4.83223		12.9147	15.7176		-5.67272	-0.03982		-7.76705	-6.46425		-10.7868	-12.7239		-7.77857	-10.1439		-13.9212	-16.6784
3.02497	3.91016		7.77857	10.1439		-6.65961	0.0028198		-5.01258	-7.34207		-9.85215	-11.5698		-18.3515	-19.3616		-9.84948	-12.1046
18.747	20.0911		7.27619	11.7616		-6.64731	1.4e-06		-5.11441	-5.19405		-14.9944	-15.9473		-19.04	-21.0262		-12.9807	-15.3564
16.8103	18.0038		7.89934	12.145					-15.4772	-12.8909		-14.6105	-15.8876		-17.1884	-18.3655		-13.8279	-16.3348
19.1074	20.544								-15.4864	-13.3128		-14.335	-16.3463		-18.4962	-20.0277		-10.3391	-12.8902
17.2909	18.8388								-14.727	-12.2988		-14.8621	-17.1538		-16.6981	-18.0893		-12.4686	-14.8883
5.6308	5.46756								-12.5985	-17.1404		-15.2809	-15.6412		-13.6771	-16.1674		-9.64505	-11.174
4.8431	6.96617								-7.13779	-6.95874		-15.6217	-17.4644		-13.1834	-16.4955
5.75254	10.7559								-8.3443	-8.75889		-15.1796	-16.8537		-15.0417	-18.1214
6.59769	6.7432								-5.07217	-3.68344		-17.2179	-18.5958		-10.3498	-10.017
9.35865	5.54813								-5.15476	-5.73172		-19.9305	-20.2939		-8.87841	-17.2461
6.42804	5.11103								-5.02825	-4.57669		-15.1492	-15.7097		-10.0377	-18.0307
												-10.4988	-12.383		-9.30084	-17.5672
												-12.756	-15.1491		-8.19552	-15.4178
												-18.6174	-15.1115		-9.40163	-18.2213
												-19.3314	-15.1472		-10.6585	-21.1507
												-18.4124	-12.4389		-10.5387	-18.4972
												-18.9847	-20.3235		-12.0752	-17.9985
												-20.2926	-18.3797		-12.6815	-18.3138
												-11.9154	-17.3038		-11.252	-18.3554
												-11.404	-9.74299		-14.2979	-22.5672
												-10.1803	-7.56975		-7.57873	-9.22555
												-12.6194	-9.91003		-9.47916	-9.85234
												-12.9085	-10.6292		-11.4221	-10.3454
												-9.0774	-8.34184		-9.85787	-8.17099
												-9.26136	-8.80465		-10.4503	-11.198
												-7.48371	-7.69044		-11.0642	-11.9239
												-18.9847	-20.3235		-15.2447	-14.1382
												-20.2926	-18.3797		-15.5056	-13.2833
															-16.6713	-15.8671
															-14.2676	-14.0699

## Sheet: Fig 2b - Statistics
	T84			E175			F181			F188			A414			P415			N419
	Paired t test			Paired t test			Paired t test			Paired t test			Paired t test			Paired t test			Paired t test
	P value	0.0088		P value	<0.0001		P value	<0.0001		P value	0.0366		P value	0.3388		P value	<0.0001		P value	<0.0001
	P value summary	**		P value summary	****		P value summary	****		P value summary	*		P value summary	ns		P value summary	****		P value summary	****
	Significantly different (P < 0.05)?	Yes		Significantly different (P < 0.05)?	Yes		Significantly different (P < 0.05)?	Yes		Significantly different (P < 0.05)?	Yes		Significantly different (P < 0.05)?	No		Significantly different (P < 0.05)?	Yes		Significantly different (P < 0.05)?	Yes
	One- or two-tailed P value?	Two-tailed		One- or two-tailed P value?	Two-tailed		One- or two-tailed P value?	Two-tailed		One- or two-tailed P value?	Two-tailed		One- or two-tailed P value?	Two-tailed		One- or two-tailed P value?	Two-tailed		One- or two-tailed P value?	Two-tailed
	t, df	t=2.905, df=20		t, df	t=9.657, df=12		t, df	t=15.90, df=11		t, df	t=2.240, df=20		t, df	t=0.9690, df=37		t, df	t=4.732, df=39		t, df	t=7.251, df=15
	Number of pairs	21		Number of pairs	13		Number of pairs	12		Number of pairs	21		Number of pairs	38		Number of pairs	40		Number of pairs	16
	How large is the effect?			How large is the effect?			How large is the effect?			How large is the effect?			How large is the effect?			How large is the effect?			How large is the effect?
	Mean of differences (B - A)	1.031		Mean of differences (B - A)	2.56		Mean of differences (B - A)	-5.56		Mean of differences (B - A)	-1.191		Mean of differences (B - A)	0.3451		Mean of differences (B - A)	2.739		Mean of differences (B - A)	1.653
	SD of differences	1.626		SD of differences	0.956		SD of differences	1.212		SD of differences	2.437		SD of differences	2.195		SD of differences	3.661		SD of differences	0.9118
	SEM of differences	0.3549		SEM of differences	0.2651		SEM of differences	0.3498		SEM of differences	0.5317		SEM of differences	0.3561		SEM of differences	0.5789		SEM of differences	0.228
	95% confidence interval	0.2906 to 1.771		95% confidence interval	1.983 to 3.138		95% confidence interval	-6.330 to -4.790		95% confidence interval	-2.300 to -0.08197		95% confidence interval	-0.3765 to 1.067		95% confidence interval	1.568 to 3.910		95% confidence interval	1.167 to 2.139
	R squared (partial eta squared)	0.2967		R squared (partial eta squared)	0.886		R squared (partial eta squared)	0.9583		R squared (partial eta squared)	0.2006		R squared (partial eta squared)	0.02475		R squared (partial eta squared)	0.3647		R squared (partial eta squared)	0.778

## Sheet: Fig 2c
	Iperoxo
T84	117.8
N419	113.62
P415	125.8
A414	103.625
F188	91.73
F181	0
E175	138.99

## Sheet: Fig 2d
Time (s)	E175		Time (s)	F181
0	-1.38632		0	-1.90639
0.1	0.55983		0.1	-0.521914
0.2	1.42112		0.2	0.605599
0.3	0.393987		0.3	1.02368
0.4	-0.338916		0.4	1.81176
0.5	-0.238411		0.5	1.46031
0.6	-0.986483		0.6	0.109706
0.7	0.229164		0.7	0.271428
0.8	1.3387		0.8	-0.389716
0.9	-1.20152		0.9	-0.439177
1	-1.52083		1	-0.41777
1.1	-0.418393		1.1	0.236768
1.2	-0.583105		1.2	0.735774
1.3	-0.869444		1.3	1.33225
1.4	0.0795322		1.4	-0.132938
1.5	-2.1223		1.5	1.20014
1.6	-1.10103		1.6	1.0374
1.7	0.246431		1.7	-0.726834
1.8	-1.21734		1.8	-0.18104
1.9	-1.94549		1.9	0.611247
2	-0.963986		2	-0.269399
2.1	-2.01741		2.1	0.255429
2.2	-0.942682		2.2	-0.706952
2.3	0.96718		2.3	-0.745001
2.4	-0.24105		2.4	-0.600945
2.5	-1.41945		2.5	-0.844485
2.6	-0.344902		2.6	-0.0914955
2.7	-0.888562		2.7	0.571355
2.8	-0.679756		2.8	-0.0223341
2.9	-0.447578		2.9	0.24289
3	-2.25455		3	0.419834
3.1	-2.66681		3.1	-1.22253
3.2	-0.148666		3.2	0.499643
3.3	-0.357505		3.3	0.500237
3.4	-2.95772		3.4	-0.243432
3.5	-2.01137		3.5	0.513138
3.6	-0.753877		3.6	-0.00752704
3.7	-1.27097		3.7	-0.0373923
3.8	-1.29394		3.8	0.440186
3.9	-0.300162		3.9	0.396475
4	-0.617685		4	1.22567
4.1	-1.4365		4.1	1.04031
4.2	-1.39404		4.2	0.591362
4.3	-2.17189		4.3	1.29712
4.4	-1.66468		4.4	0.819363
4.5	-2.20189		4.5	0.0967096
4.6	-0.0301021		4.6	1.65306
4.7	-0.741998		4.7	2.35386
4.8	-1.19336		4.8	1.10092
4.9	-4.14225		4.9	1.53701
5	-1.38397		5	0.907123
5.1	-1.19732		5.1	-0.482989
5.2	-1.1672		5.2	-0.459678
5.3	-0.853307		5.3	-0.812811
5.4	-0.615784		5.4	0.115987
5.5	-2.00146		5.5	0.433298
5.6	-1.69969		5.6	-0.441963
5.7	-0.279855		5.7	1.02028
5.8	-0.309227		5.8	1.06412
5.9	0.196659		5.9	-0.129019
6	-0.41929		6	1.6782
6.1	-3.10728		6.1	2.02306
6.2	-3.4177		6.2	1.22513
6.3	-0.629765		6.3	1.81068
6.4	-0.381251		6.4	1.57957
6.5	-0.796853		6.5	2.41957
6.6	-0.860902		6.6	2.83967
6.7	-2.43037		6.7	2.00818
6.8	-1.90967		6.8	1.91926
6.9	-0.990744		6.9	1.67314
7	-1.44327		7	0.1806
7.1	-2.44408		7.1	0.569292
7.2	-1.59652		7.2	0.728275
7.3	-2.16158		7.3	0.57865
7.4	-1.33909		7.4	1.32205
7.5	-0.300956		7.5	0.725359
7.6	-1.27949		7.6	-0.287508
7.7	-1.60551		7.7	0.622309
7.8	-1.25476		7.8	0.673946
7.9	-1.59602		7.9	0.531042
8	-0.884579		8	1.27822
8.1	-0.653108		8.1	0.680496
8.2	-2.79747		8.2	0.473711
8.3	-2.36916		8.3	0.353281
8.4	-1.5942		8.4	-0.57017
8.5	-3.52989		8.5	0.64551
8.6	-3.92768		8.6	0.515074
8.7	-1.4994		8.7	-0.362613
8.8	-2.10142		8.8	0.595137
8.9	-1.80073		8.9	0.323666
9	-0.516989		9	0.0485586
9.1	-0.830445		9.1	1.10256
9.2	-1.26107		9.2	1.14692
9.3	-0.730334		9.3	1.48171
9.4	-1.6638		9.4	1.2308
9.5	-1.43652		9.5	0.504479
9.6	-0.663684		9.6	0.085259
9.7	-2.36354		9.7	-0.0998659
9.8	-3.20424		9.8	-0.336365
9.9	-1.8564		9.9	0.217354
10	-1.48158		10	1.26404
10.1	-1.74268		10.1	0.71733
10.2	-1.21596		10.2	1.46111
10.3	-2.33235		10.3	1.00437
10.4	-2.78512		10.4	0.0272768
10.5	-3.1728		10.5	0.0350128
10.6	-3.25248		10.6	0.330801
10.7	-2.04655		10.7	-0.25112
10.8	-0.185113		10.8	0.347184
10.9	-0.970116		10.9	-0.442481
11	-1.5927		11	-0.495541
11.1	-2.58094		11.1	-0.212453
11.2	-2.97248		11.2	-0.502703
11.3	-2.68478		11.3	-0.0115169
11.4	-2.09215		11.4	0.868607
11.5	-4.06819		11.5	0.108048
11.6	-4.40647		11.6	0.727885
11.7	-4.07112		11.7	0.556794
11.8	-5.83029		11.8	-0.10209
11.9	-5.93313		11.9	0.805393
12	-6.52489		12	0.078144
12.1	-7.65108		12.1	-0.601715
12.2	-7.3047		12.2	0.260044
12.3	-5.25749		12.3	0.223101
12.4	-5.77051		12.4	-0.234088
12.5	-5.41563		12.5	-0.0649962
12.6	-5.63655		12.6	-0.836145
12.7	-6.95121		12.7	-1.78037
12.8	-6.61366		12.8	-2.13282
12.9	-6.13197		12.9	-2.72818
13	-8.74396		13	-0.8697
13.1	-8.3504		13.1	-0.758167
13.2	-6.46855		13.2	-1.54858
13.3	-6.70811		13.3	-0.858569
13.4	-6.89074		13.4	-1.08271
13.5	-6.26804		13.5	-2.28276
13.6	-8.04047		13.6	-1.35815
13.7	-7.65704		13.7	-2.48585
13.8	-6.65015		13.8	-2.46971
13.9	-7.70607		13.9	-3.18959
14	-7.57929		14	-3.79336
14.1	-6.74163		14.1	-4.31087
14.2	-7.87019		14.2	-3.108
14.3	-7.66657		14.3	-3.12219
14.4	-6.3047		14.4	-1.94521
14.5	-7.50823		14.5	-1.79207
14.6	-8.18899		14.6	-2.50274
14.7	-6.73709		14.7	-2.11486
14.8	-7.99998		14.8	-2.39624
14.9	-7.608		14.9	-3.16022
15	-6.69936		15	-2.0357
15.1	-7.6154		15.1	-2.57923
15.2	-7.07988		15.2	-3.22679
15.3	-5.00215		15.3	-2.84166
15.4	-6.50805		15.4	-3.95302
15.5	-8.3966		15.5	-4.28604
15.6	-8.49057		15.6	-4.41508
15.7	-8.587		15.7	-4.28611
15.8	-7.63012		15.8	-3.384
15.9	-6.46211		15.9	-3.38404
16	-8.38975		16	-4.63318
16.1	-8.33268		16.1	-3.34538
16.2	-6.34472		16.2	-3.68884
16.3	-6.74443		16.3	-4.54358
16.4	-5.52338		16.4	-4.45072
16.5	-5.49486		16.5	-4.08204
16.6	-7.40159		16.6	-4.62891
16.7	-8.05685		16.7	-3.96413
16.8	-5.96059		16.8	-4.35023
16.9	-7.30739		16.9	-3.5949
17	-7.0439		17	-3.16965
17.1	-5.79553		17.1	-2.91275
17.2	-7.93871		17.2	-3.18678
17.3	-7.70591		17.3	-2.62202
17.4	-5.94492		17.4	-3.7811
17.5	-6.63116		17.5	-2.72717
17.6	-7.75688		17.6	-2.87446
17.7	-6.41754		17.7	-3.35319
17.8	-7.22042		17.8	-2.9448
17.9	-6.48138		17.9	-3.02856
18	-5.30843		18	-4.1761
18.1	-6.25264		18.1	-2.59707
18.2	-5.57559		18.2	-2.37489
18.3	-3.84245		18.3	-1.66212
18.4	-6.07088		18.4	-0.73873
18.5	-6.69201		18.5	0.0681332
18.6	-5.40014		18.6	0.16793
18.7	-6.28657		18.7	-0.0167726
18.8	-6.47156		18.8	-0.940346
18.9	-4.78373		18.9	-1.01053
19	-4.25688		19	-1.37811
19.1	-2.83567		19.1	-2.46049
19.2	-1.69997		19.2	-1.64316
19.3	-3.60036		19.3	-1.03678
19.4	-3.62597		19.4	-1.31762
19.5	-2.47464		19.5	-0.0415235
19.6	-3.77606		19.6	0.348062
19.7	-3.20427		19.7	-0.318633
19.8	-1.69274		19.8	0.181168
19.9	-2.54659		19.9	-0.260259
20	-2.78074		20	-0.604486
20.1	-1.60693		20.1	0.286608
20.2	-3.32349		20.2	0.744921
20.3	-2.43455		20.3	0.993113
20.4	-1.3604		20.4	1.56403
20.5	-2.18646		20.5	0.679424
20.6	-2.51631		20.6	0.17809
20.7	-1.58604		20.7	0.217643
20.8	-1.97023		20.8	-0.567633
20.9	-1.75737		20.9	1.47713
21	-0.760956		21	1.96538
21.1	-2.84136		21.1	0.450201
21.2	-2.23386		21.2	0.822392
21.3	-0.301574		21.3	-0.266984
21.4	-1.27232		21.4	-1.55876
21.5	-4.15476		21.5	-0.295318
21.6	-1.97331		21.6	-0.12463
21.7	-0.271644		21.7	0.144944
21.8	-0.953821		21.8	0.82633
21.9	-1.33894		21.9	0.735758
22	-1.29278		22	1.32323
22.1	-0.294833		22.1	1.69985
22.2	-1.31788		22.2	0.801417
22.3	-0.593302		22.3	2.21122
22.4	-2.6166		22.4	1.83094
22.5	0.046993		22.5	-0.224877
22.6	0.00450273		22.6	0.78435
22.7	-0.580648		22.7	0.862634
22.8	-1.37364		22.8	0.348093
22.9	-0.967221		22.9	0.849275
23	-0.10607		23	0.0959147
23.1	-0.0322117		23.1	0.199317
23.2	0.276709		23.2	0.630809
23.3	-0.81		23.3	0.354414
23.4	-0.899452		23.4	0.815527
23.5	-2.2132		23.5	0.956686
23.6	-0.941724		23.6	0.342441
23.7	-0.36384		23.7	0.49727
23.8	-0.617427		23.8	-0.0377583
23.9	-2.14808		23.9	-1.46274
24	0.0940289		24	-1.78825
24.1	-0.850068		24.1	-3.21651
24.2	-1.83191		24.2	-4.61268
24.3	-0.965699		24.3	-4.38565
24.4	-0.151029		24.4	-4.06254
24.5	-1.15492		24.5	-3.86355
24.6	0.0543965		24.6	-3.31091
24.7	1.00554		24.7	-3.12004
24.8	0.762183		24.8	-4.15308
24.9	-0.363028		24.9	-4.66204
25	0.342381		25	-5.51371
25.1	-1.51252		25.1	-5.49952
25.2	-0.219281		25.2	-5.0374
25.3	-1.71646		25.3	-6.14239
25.4	-0.0931236		25.4	-5.44682
25.5	-0.429071		25.5	-4.96736
25.6	0.774297		25.6	-5.52259
25.7	-0.0151208		25.7	-5.00004
25.8	0.372462		25.8	-5.29554
25.9	-1.26276		25.9	-5.38667
26	-4.09776		26	-4.70957
26.1	-0.929399		26.1	-5.6029
26.2	4.72072		26.2	-5.64531
26.3	9.36713		26.3	-5.66521
26.4	12.7788		26.4	-6.3328
26.5	14.3457		26.5	-6.97309
26.6	13.8343		26.6	-6.15935
26.7	14.7098		26.7	-6.44796
26.8	16.6194		26.8	-5.17667
26.9	16.4132		26.9	-4.74007
27	17.1149		27	-5.80656
27.1	18.0971		27.1	-4.69674
27.2	17.7073		27.2	-5.53073
27.3	18.5447		27.3	-6.5257
27.4	20.1354		27.4	-5.72984
27.5	19.126		27.5	-6.78087
27.6	20.0085		27.6	-7.61772
27.7	20.8369		27.7	-7.73305
27.8	18.7386		27.8	-8.76811
27.9	19.3021		27.9	-8.29164
28	20.8331		28	-8.18585
28.1	19.8482		28.1	-8.15231
28.2	19.0832		28.2	-6.43879
28.3	20.5938		28.3	-6.22308
28.4	19.9607		28.4	-7.58767
28.5	20.8752		28.5	-6.69369
28.6	20.7742		28.6	-7.34158
28.7	20.0168		28.7	-8.20287
28.8	19.5505		28.8	-7.61746
28.9	21.0705		28.9	-7.93852
29	19.5042		29	-8.6844
29.1	20.6236		29.1	-8.37825
29.2	21.4768		29.2	-9.15777
29.3	19.9141		29.3	-8.72296
29.4	20.7638		29.4	-8.4155
29.5	22.0265		29.5	-8.15057
29.6	20.5216		29.6	-7.34549
29.7	20.0589		29.7	-6.56966
29.8	22.136		29.8	-7.28661
29.9	20.3595		29.9	-5.95823
30	19.3783		30	-6.36436
30.1	20.6596		30.1	-7.47223
30.2	20.3879		30.2	-6.9935
30.3	21.5569		30.3	-7.64136
30.4	22.9236		30.4	-8.31775
30.5	22.2522		30.5	-7.28748
30.6	22.2217		30.6	-7.95603
30.7	23.6528		30.7	-7.93545
30.8	22.0489		30.8	-7.85972
30.9	20.8915		30.9	-8.35427
31	21.0028		31	-8.63747
31.1	19.7863		31.1	-7.97877
31.2	21.0233		31.2	-7.73402
31.3	22.0891		31.3	-6.12575
31.4	21.0335		31.4	-6.48892
31.5	20.8805		31.5	-6.42394
31.6	23.1242		31.6	-5.48807
31.7	22.4525		31.7	-6.26242
31.8	19.6567		31.8	-7.31914
31.9	21.0874		31.9	-6.42794
32	22.0767		32	-6.85665
32.1	20.6264		32.1	-6.88247
32.2	21.3091		32.2	-7.42715
32.3	21.9627		32.3	-7.60923
32.4	21.1053		32.4	-7.80252
32.5	20.3741		32.5	-7.73657
32.6	21.792		32.6	-7.38175
32.7	20.0559		32.7	-6.06942
32.8	21.3868		32.8	-5.77583
32.9	22.2932		32.9	-5.69802
33	21.3737		33	-4.82455
33.1	21.6395		33.1	-5.33197
33.2	23.1146		33.2	-7.16471
33.3	21.2079		33.3	-6.87543
33.4	21.6086		33.4	-6.36927
33.5	22.9415		33.5	-6.65663
33.6	21.8461		33.6	-6.74414
33.7	21.1154		33.7	-6.18999
33.8	21.8851		33.8	-4.96581
33.9	19.8181		33.9	-4.58356
34	20.2318		34	-5.10024
34.1	21.4076		34.1	-3.67907
34.2	21.6553		34.2	-3.57786
34.3	22.2496		34.3	-5.38679
34.4	24.3045		34.4	-4.9784
34.5	22.4586		34.5	-5.32675
34.6	22.3006		34.6	-4.99963
34.7	21.6771		34.7	-3.34794
34.8	20.0257		34.8	-2.68534
34.9	20.5137		34.9	-2.34672
35	22.6038		35	-2.821
35.1	21.6386		35.1	-3.79244
35.2	21.7095		35.2	-3.77429
35.3	22.8746		35.3	-4.14051
35.4	21.9818		35.4	-3.1913
35.5	21.9094		35.5	-1.33873
35.6	23.0673		35.6	-0.44645
35.7	21.7066		35.7	-1.4336
35.8	21.4371		35.8	-1.00774
35.9	22.6315		35.9	-1.80784
36	21.71		36	-2.74233
36.1	22.3946		36.1	-2.32728
36.2	22.8486		36.2	-2.07226
36.3	21.4288		36.3	-2.25707
36.4	21.343		36.4	-1.70648
36.5	22.6227		36.5	-1.88954
36.6	21.1143		36.6	-0.934892
36.7	21.9253		36.7	0.118368
36.8	23.1008		36.8	-0.0762548
36.9	21.4162		36.9	0.317138
37	20.7666		37	0.152579
37.1	22.9893		37.1	-1.35553
37.2	21.7308		37.2	-0.162987
37.3	21.3511		37.3	0.38228
37.4	22.006		37.4	-0.227807
37.5	21.2183		37.5	0.892646
37.6	21.0878		37.6	-0.168122
37.7	22.3999		37.7	-0.880114
37.8	21.141		37.8	-0.215836
37.9	20.4579		37.9	-0.720172
38	21.1062		38	-0.463323
38.1	19.6366		38.1	-0.568416
38.2	20.6216		38.2	-1.39817
38.3	21.6822		38.3	-0.620005
38.4	20.0679		38.4	-1.21944
38.5	19.9793		38.5	-1.8616
38.6	20.954		38.6	-0.666707
38.7	18.631		38.7	-0.725664
38.8	16.642		38.8	-2.00191
38.9	18.3492		38.9	-1.11178
39	18.3446		39	-1.2284
39.1	19.907		39.1	-1.48641
39.2	20.2989		39.2	-1.21348
39.3	17.6896		39.3	-1.71512
39.4	16.1406		39.4	-2.19966
39.5	16.4636		39.5	-1.50122
39.6	15.0325		39.6	-1.28312
39.7	16.5476		39.7	0.291177
39.8	18.991		39.8	0.397074
39.9	16.8017		39.9	-0.488924
40	15.6321		40	0.966123
40.1	16.722		40.1	0.9933
40.2	15.9755		40.2	-0.155788
40.3	16.4785		40.3	0.793411
40.4	17.1802		40.4	0.642922
40.5	15.9864		40.5	-0.385263
40.6	16.1936		40.6	-0.35058
40.7	17.5158		40.7	-0.931176
40.8	14.5842		40.8	-0.424477
40.9	13.8645		40.9	-0.2307
41	14.7401		41	-0.243284
41.1	12.6655		41.1	0.247042
41.2	12.8928		41.2	-0.402751
41.3	14.8461		41.3	-1.57813
41.4	13.619		41.4	-1.50635
41.5	12.7993
41.6	14.4852
41.7	12.7945
41.8	10.3754
41.9	13.8869
42	14.9557
42.1	11.86
42.2	10.6114
42.3	11.5779
42.4	12.6028
42.5	11.668
42.6	11.2487
42.7	9.59722
42.8	10.2126
42.9	10.1102
43	12.0292
43.1	11.78
43.2	9.88997
43.3	6.93493
43.4	9.34816
43.5	10.0612
43.6	11.5637
43.7	9.01534
43.8	7.69586
43.9	8.00663
44	11.2614
44.1	9.84193
44.2	7.18622
44.3	8.02462
44.4	9.11026
44.5	8.10359
44.6	7.95258
44.7	8.1197
44.8	7.78811
44.9	8.2793
45	8.86301
45.1	7.72261
45.2	8.41723
45.3	9.22379
45.4	7.54881
45.5	7.73381
45.6	8.76413
45.7	7.24312
45.8	7.47102
45.9	8.20034
46	7.17311
46.1	6.38252
46.2	7.47109
46.3	6.66382
46.4	7.49077
46.5	7.77161
46.6	6.27682
46.7	7.00604
46.8	7.77851
46.9	6.14399
47	6.11287
47.1	7.38925
47.2	6.02042
47.3	6.06039
47.4	7.20213
47.5	6.12036
47.6	5.85384
47.7	6.91584
47.8	5.9825
47.9	6.28613
48	7.25613
48.1	6.32872
48.2	6.46784
48.3	6.69173
48.4	5.33534
48.5	5.86358
48.6	7.17573
48.7	5.50674
48.8	5.58429
48.9	6.58602
49	4.60595
49.1	4.77119
49.2	6.14776
49.3	5.44537
49.4	5.62949
49.5	7.725
49.6	5.70584
49.7	4.70213
49.8	5.89131
49.9	5.63646
50	6.45833
50.1	6.31021
50.2	4.00935
50.3	4.37259
50.4	6.9819
50.5	5.20668
50.6	4.27831
50.7	5.07723
50.8	3.90044
50.9	3.65591
51	4.52078
51.1	4.07979
51.2	4.38921
51.3	5.82564
51.4	4.38356
51.5	5.40081
51.6	6.19458
51.7	4.57953
51.8	4.7322
51.9	7.10296
52	5.71745
52.1	5.6571
52.2	6.53784
52.3	5.35751
52.4	4.33174
52.5	5.50693
52.6	4.80215
52.7	5.74933
52.8	6.72347
52.9	5.74264
53	4.96303
53.1	5.45772
53.2	4.02853
53.3	5.21638
53.4	6.44125
53.5	4.33011
53.6	3.50818
53.7	5.2255
53.8	3.57862
53.9	2.77533
54	4.4688
54.1	5.33489
54.2	3.16246
54.3	4.54314
54.4	5.13219
54.5	4.69511
54.6	5.09968
54.7	5.57858
54.8	4.60988
54.9	3.58961
55	4.12192
55.1	3.48946
55.2	4.76803
55.3	5.81716
55.4	6.61586
55.5	5.71095
55.6	5.26472
55.7	2.53597
55.8	4.59541
55.9	4.87864
56	5.08686
56.1	4.00974
56.2	4.29266
56.3	2.85902
56.4	4.51294
56.5	5.32356
56.6	4.69506
56.7	5.17717
56.8	5.64235
56.9	3.69323
57	4.5956
57.1	6.20513
57.2	4.42009
57.3	3.92946
57.4	5.08436
57.5	3.99062
57.6	3.54362
57.7	4.20019
57.8	3.46193
57.9	3.97218
58	5.31167
58.1	4.08246
58.2	4.62016
58.3	6.13464
58.4	4.88479
58.5	3.60143
58.6	4.46095
58.7	3.51725
58.8	4.23313
58.9	4.85097
59	3.17162
59.1	3.56475
59.2	5.20729
59.3	4.5075
59.4	4.68387
59.5	6.00443
59.6	4.15121
59.7	3.86554
59.8	5.59072
59.9	6.16238
60	4.64227
60.1	4.78043
60.2	4.16688
60.3	5.95911
60.4	5.52402
60.5	3.42857
60.6	2.40254
60.7	4.58001

## Sheet: Fig 2e
T84_ACh	T84_Arec		E175_ACh	E175_Arec		F181_ACh	F181_Arec		F188_ACh	F188_Arec		A414_ACh	A414_Arec		P415_ACh	P415_Arec		N419_ACh	N419_Arec
11.3885	-4.10487		17.1787	-6.49542		-2.60685	-1.97694		-9.04493	-7.28995		-17.618	-5.35459		-15.3966	-10.6426		-14.8979	-8.17145
4.46243	-2.409		13.1201	-5.90417		-5.24877	-2.95387		-11.6368	-8.35482		-17.1721	-5.0181		-15.966	-13.171		-16.8314	-11.4971
4.74086	-2.14778		9.77612	-7.95735		-10.8316	-7.73386		-12.8895	-7.3101		-15.5762	-4.6442		-15.9461	-12.8402		-17.5816	-14.3259
4.56117	-2.03009		18.4833	-5.67197		-8.18814	-7.31169		-9.29938	-6.34057		-13.301	-4.18183		-18.7735	-14.138		-14.2857	-10.0826
4.08283	-3.02783		16.3155	-6.04833		-8.53641	-6.50625		-10.2959	-8.75309		-14.4466	-9.58038		-17.0053	-12.5103		-13.125	-7.32218
6.41863	-2.83937		16.3155	-5.34278		-11.298	-7.2447		-10.692	-10.6255		-13.5045	-10.1396		-15.061	-12.1046		-11.257	-8.17844
7.21261	-2.05647		16.8733	-4.02064		-11.145	-7.10359		-13.8971	-9.89123		-11.5318	-8.15104		-15.5825	-10.6265		-11.7465	-8.03709
8.88762	-2.58379		8.8366	-5.89589		-10.6451	-7.51345		-15.5724	-10.8156		-8.44586	-6.72917		-15.9913	-12.3648		-13.3836	-8.60121
8.26696	-3.11919		18.68	-5.3963		-8.40922	-5.80584		-12.5515	-8.82643		-18.7344	-8.18966		-13.7333	-9.33262		-10.5896	-5.94345
7.44435	-2.71502					-3.17166	-1.92745		-9.89883	-8.19765		-22.4524	-5.7548		-14.3926	-9.19311		-13.2471	-7.75018
7.13814	-2.23297					-12.2822	-7.66966		-13.6839	-9.94968		-10.1132	-9.49228		-12.7847	-9.51658		-14.7542	-8.25156
6.17235	-1.9298					-10.4258	-10.0197		-12.0723	-5.66802		-10.1466	-8.8605		-11.7835	-8.87677		-7.59527	-4.49741
3.04656	-1.60581					-3.17166	-1.92745		-11.479	-5.85774		-18.7344	-8.18966		-19.6526	-10.8277		-10.3652	-5.68892
4.95567	-1.8521								-7.76472	-4.37437		-16.4657	-7.75084		-18.2435	-10.3989		-13.7285	-8.57104
8.85864	-3.85875								-9.08763	-5.31161		-22.7856	-5.43859		-20.1156	-13.6555		-18.5129	-15.3694
7.68007	-3.02676								-11.5022	-6.94942		-22.8897	-5.21199		-18.6173	-13.0068		-16.1854	-15.6091
7.87781	-2.79714								-7.64688	-4.21209		-22.7068	-4.76807		-18.3483	-13.2892		-19.2371	-15.7219
8.00964	-3.5927								-12.6054	-7.74448		-22.4863	-5.42717		-17.2047	-12.2755		-19.3363	-15.7008
3.93331	-1.01714								-12.2878	-8.46616		-13.9459	-5.77164		-15.706	-12.0187		-18.9307	-15.603
5.58435	-2.50485								-10.5267	-8.49513		-18.1071	-7.17418		-16.3654	-10.3409		-8.16287	-7.32888
3.63955	-1.35953								-9.60183	-7.80386		-14.6016	-4.82992		-15.7685	-8.47978		-8.07574	-5.99657
1.15132	-0.69724								-7.66659	-5.62041		-6.46267	-3.40622		-17.0266	-12.0685		-7.91144	-5.55648
4.53203	-2.46702								-5.88324	-4.31299		-9.1445	-5.40765		-14.5047	-9.2008
1.55547	-0.72652								-8.98644	-6.62386		-22.4524	-5.7548		-14.0816	-7.61299
4.87442	-2.67314								-7.89361	-4.89576		-10.1132	-9.49228		-10.7473	-7.71742
									-7.24766	-6.44254		-10.1466	-8.8605		-11.8722	-7.73258
									-7.06681	-5.95191
									-6.92082	-5.01293
									-6.7974	-4.59591
									-7.31158	-7.02833
									-7.02628	-5.37437
									-7.28709	-5.81311
									-7.1402	-5.14221
									-5.51103	-2.99921
									-5.7435	-4.10269

## Sheet: Fig 2e - Statistics
	T84			E175			F181			F188			A414			P415			N419
	Paired t test			Paired t test			Paired t test			Paired t test			Paired t test			Paired t test			Paired t test
	P value	<0.0001		P value	0.0002		P value	<0.0001		P value	<0.0001		P value	<0.0001		P value	<0.0001		P value	<0.0001
	P value summary	****		P value summary	***		P value summary	****		P value summary	****		P value summary	****		P value summary	****		P value summary	****
	Significantly different (P < 0.05)?	Yes		Significantly different (P < 0.05)?	Yes		Significantly different (P < 0.05)?	Yes		Significantly different (P < 0.05)?	Yes		Significantly different (P < 0.05)?	Yes		Significantly different (P < 0.05)?	Yes		Significantly different (P < 0.05)?	Yes
	One- or two-tailed P value?	Two-tailed		One- or two-tailed P value?	Two-tailed		One- or two-tailed P value?	Two-tailed		One- or two-tailed P value?	Two-tailed		One- or two-tailed P value?	Two-tailed		One- or two-tailed P value?	Two-tailed		One- or two-tailed P value?	Two-tailed
	t, df	t=9.855, df=24		t, df	t=6.439, df=8		t, df	t=5.990, df=12		t, df	t=10.68, df=34		t, df	t=7.543, df=25		t, df	t=15.73, df=25		t, df	t=11.26, df=21
	Number of pairs	25		Number of pairs	9		Number of pairs	13		Number of pairs	35		Number of pairs	26		Number of pairs	26		Number of pairs	22
	How large is the effect?			How large is the effect?			How large is the effect?			How large is the effect?			How large is the effect?			How large is the effect?			How large is the effect?
	Mean of differences (D - C)	-3.484		Mean of differences (D - C)	-9.205		Mean of differences (D - C)	-2.328		Mean of differences (D - C)	-2.782		Mean of differences (D - C)	-8.866		Mean of differences (D - C)	-4.874		Mean of differences (D - C)	-3.906
	SD of differences	1.768		SD of differences	4.289		SD of differences	1.401		SD of differences	1.541		SD of differences	5.993		SD of differences	1.58		SD of differences	1.628
	SEM of differences	0.3535		SEM of differences	1.43		SEM of differences	0.3887		SEM of differences	0.2604		SEM of differences	1.175		SEM of differences	0.31		SEM of differences	0.347
	95% confidence interval	-4.214 to -2.754		95% confidence interval	-12.50 to -5.909		95% confidence interval	-3.175 to -1.481		95% confidence interval	-3.311 to -2.253		95% confidence interval	-11.29 to -6.445		95% confidence interval	-5.513 to -4.236		95% confidence interval	-4.628 to -3.185
	R squared (partial eta squared)	0.8019		R squared (partial eta squared)	0.8383		R squared (partial eta squared)	0.7494		R squared (partial eta squared)	0.7704		R squared (partial eta squared)	0.6947		R squared (partial eta squared)	0.9082		R squared (partial eta squared)	0.8578

## Sheet: Fig 2f
	Arecoline
T84	42.82
N419	70.11
P415	69.27
A414	49.17
F188	71.27
F181	70.51
E175	42.68

## Sheet: Fig 2g
Time (s)	E175		Time (s)	F181
0	-1.83692		0	-1.68358
0.1	-0.85611		0.1	0.415872
0.2	0.0143286		0.2	0.783167
0.3	0.6647		0.3	1.36026
0.4	0.968523		0.4	0.192065
0.5	1.07213		0.5	-0.297255
0.6	0.230176		0.6	-0.344576
0.7	-0.224044		0.7	0.751052
0.8	-0.157305		0.8	-0.0717894
0.9	0.364451		0.9	-0.491259
1	1.39203		1	-0.288857
1.1	0.520539		1.1	0.873623
1.2	1.54823		1.2	0.236707
1.3	1.45651		1.3	-0.699841
1.4	0.867956		1.4	-1.37056
1.5	-1.95316		1.5	-0.329637
1.6	-0.526288		1.6	-0.194719
1.9	0.494235		1.7	0.489166
2	0.411988		1.8	0.365365
2.1	-0.224044		1.9	0.615251
2.2	-0.157305		2	-0.356026
2.3	0.364451		2.1	-0.336419
2.4	1.39203		2.2	0.466105
2.5	0.520539		2.3	1.39215
2.6	1.54823		2.4	0.254517
2.7	1.45651		2.5	0.0982018
2.8	0.867956		2.6	0.795293
2.9	-1.77725		2.7	1.84251
3	-0.996883		2.8	0.965559
3.1	-1.31874		2.9	0.00699311
3.2	-1.94246		3	-0.145229
3.5	-2.24037		3.1	0.659641
3.6	-0.779418		3.2	0.481668
3.7	0.0143286		3.3	-0.393718
3.8	0.6647		3.4	-0.163103
3.9	0.968523		3.5	1.30424
4	1.07213		3.6	0.887958
4.1	0.230176		3.7	0.481876
4.2	-0.224044		3.8	0.42642
4.3	-0.157305		3.9	1.73891
4.4	0.364451		4	-0.63063
4.5	1.39203		4.1	1.51571
4.6	0.959486		4.2	2.56771
4.7	-0.301402		4.3	3.73969
4.8	-0.78756		4.4	-0.00370673
4.9	-0.0296664		4.5	-0.336488
5	0.507845		4.6	-1.14249
5.1	0.847171		4.7	0.457255
5.4	0.10586		4.8	0.900014
5.5	-1.37187		4.9	1.4161
5.6	-1.03827		5	0.975718
5.7	0.0143286		5.1	1.25521
5.8	0.6647		5.2	0.377259
5.9	0.968523		5.3	-0.164865
6	1.07213		5.4	-0.421321
6.1	0.230176		5.5	0.683922
6.2	-0.224044		5.6	1.00622
6.3	-0.157305		5.7	1.07193
6.4	0.364451		5.8	0.958664
6.5	1.39203		5.9	1.93783
6.6	0.520539		6	1.42922
6.7	1.54823		6.1	0.304313
6.8	1.45651		6.2	-0.354688
6.9	0.867956		6.3	0.737405
7	-1.77725		6.4	0.795093
7.1	-0.996883		6.5	0.979948
7.2	-1.56288		6.6	1.28801
7.3	-1.12181		6.7	2.33224
7.4	-0.111368		6.8	0.478428
7.5	0.721189		6.9	-1.40846
7.6	-0.570074		7	-2.81726
7.7	-1.48848		7.1	-2.5881
7.8	-1.76512		7.2	-3.0269
7.9	-0.3517		7.3	-3.92019
8	0.10988		7.4	-4.08047
8.1	-0.165995		7.5	-4.15018
8.2	-1.97231		7.6	-5.19567
8.3	-1.45807		7.7	-6.62163
8.4	-0.914835		7.8	-6.94279
8.5	-1.60209		7.9	-6.31526
8.6	-3.05214		8	-7.27356
8.7	-1.32456		8.1	-7.09304
8.8	1.1687		8.2	-6.29508
8.9	0.767312		8.3	-5.81696
9	-1.58626		8.4	-6.92391
9.1	-1.18788		8.5	-7.04141
9.2	-1.06483		8.6	-6.6169
9.3	-0.0981804		8.7	-6.68198
9.4	-0.671663		8.8	-8.06672
9.5	-0.541768		8.9	-8.81599
9.6	0.990281		9	-8.5257
9.7	2.90421		9.1	-6.65887
9.8	2.6078		9.2	-6.66025
9.9	1.01163		9.3	-7.43335
10	2.11573		9.4	-8.30569
10.1	2.98225		9.5	-7.70985
10.4	3.93731		9.6	-8.38189
10.5	4.62052		9.7	-8.25649
10.6	3.70093		9.8	-8.02197
10.7	3.63815		9.9	-7.33949
10.8	3.69779		10	-8.40017
10.9	3.75567		10.1	-8.81015
11	1.28447		10.2	-8.7487
11.1	2.57225		10.3	-7.44071
11.2	4.0406		10.4	-7.23209
11.3	4.21551		10.5	-8.54729
11.4	2.52151		10.6	-9.27112
11.5	1.91068		10.7	-7.98957
11.6	2.78284		10.8	-7.45811
11.7	1.94702		10.9	-7.98383
11.8	2.43615		11	-8.99256
11.9	2.45883		11.1	-9.04644
12.1	2.19407		11.2	-10.2096
12.2	2.45715		11.3	-9.74401
12.3	4.0406		11.4	-9.29514
12.4	4.21551		11.5	-8.13687
12.5	2.52151		11.6	-8.53783
12.6	1.91068		11.7	-8.93145
12.7	2.3849		11.8	-9.8438
12.8	3.50277		11.9	-9.40413
13	4.8767		12	-8.20287
13.1	3.6718		12.1	-9.34635
13.2	3.63815		12.2	-10.2316
13.3	3.69779		12.3	-10.1212
13.4	3.75567		12.4	-8.83952
13.5	1.43574		12.5	-9.1011
13.6	2.13795		12.6	-8.86758
13.8	2.44303		12.7	-8.98127
13.9	2.93518		12.8	-10.0077
14	1.91068		12.9	-9.6186
14.1	2.3849		13	-9.03248
14.2	3.50277		13.1	-8.5729
14.4	4.75361		13.2	-9.29999
14.5	4.2154		13.3	-9.29536
14.8	3.97941		13.4	-9.17881
14.9	4.54552		13.5	-9.01965
15	3.70093		13.6	-8.42919
15.1	3.63815		13.7	-9.56086
15.2	3.69779		13.8	-9.10735
15.3	3.75567		13.9	-8.0062
15.4	1.28447		14	-6.38673
15.5	2.57225		14.1	-5.87297
15.6	4.0406		14.2	-4.79048
15.7	4.21551		14.3	-4.0274
15.8	2.52151		14.4	-3.79926
15.9	1.91068		14.5	-3.92735
16	2.78284		14.6	-3.46018
16.1	1.94702		14.7	-3.07728
16.2	2.46185		14.8	-2.75117
16.3	2.08305		14.9	-3.25125
16.4	3.40772		15	-2.68772
16.5	2.88006		15.1	-2.13124
16.6	3.33056		15.2	-1.04088
16.7	3.13848		15.3	-1.59747
16.8	2.97987		15.4	-1.62504
16.9	2.50104		15.5	-1.78157
17	1.8183		15.6	-1.99939
17.1	1.80421		15.7	-2.88811
17.2	1.86924		15.8	-3.09076
17.3	2.44871		15.9	-2.32014
17.4	1.66046		16	-0.583471
17.5	1.58922		16.1	-0.602416
17.6	1.6497		16.2	-0.945243
17.7	1.65157		16.3	-1.72598
17.8	1.72976		16.4	-0.859586
17.9	4.38271		16.5	-1.34518
18	5.27948		16.6	-0.514261
18.1	4.41568		16.7	-0.241501
18.2	3.74261		16.8	0.13292
18.3	3.79581		16.9	-0.976736
18.4	2.45138		17	-1.43162
18.5	1.27835		17.1	-1.09919
18.6	2.0847		17.2	-1.09042
18.7	3.08098		17.3	0.105851
18.8	3.20927		17.4	-0.859453
18.9	2.57304		17.5	-1.3964
19	2.81036		17.6	-1.42022
19.1	2.33109		17.7	-0.213593
19.2	1.50119		17.8	-0.449689
19.3	2.03485		17.9	-0.644373
19.4	0.598922		18	-0.241932
19.5	-0.167223		18.1	-0.563025
19.6	1.46562		18.2	-1.27553
19.7	1.84744		18.3	-1.14352
19.8	0.0679794		18.4	-0.4099
19.9	0.322858		18.5	-0.207533
20	2.14401		18.6	-1.06389
20.1	1.16129		18.7	-1.28557
20.2	1.13244		18.8	-0.963826
20.3	1.45547		18.9	0.852984
20.4	1.02364		19	-0.104841
20.5	1.23951		19.1	-0.888492
20.6	0.739735		19.2	-1.42569
20.7	-0.801398		19.3	-0.810368
20.8	-2.2182		19.4	-1.15978
20.9	-1.43419		19.5	-0.750159
21	-0.857155		19.6	-0.094495
21.1	-0.455966		19.7	0.568023
21.2	-1.30183		19.8	-0.263972
21.3	-1.65777		19.9	-0.568901
21.4	-0.519446		20	-1.20983
21.5	1.66377		20.1	0.100518
21.8	2.73155		20.2	0.345487
21.9	0.812631		20.3	0.227442
22	-0.764711		20.4	-0.45414
22.1	-2.01992		20.5	0.450278
22.2	-1.46664		20.6	0.199452
22.3	-0.451612		20.7	-0.473967
22.4	0.217236		20.8	-0.686948
22.5	-1.0965		20.9	0.0316837
22.6	-2.68576		21	-0.941199
22.8	-2.3829		21.1	-1.73375
22.9	-0.327162		21.2	-2.08693
23	1.66377		21.3	-1.35205
23.3	2.73155		21.4	-2.44577
23.4	0.812631		21.5	-2.84933
23.5	-0.992637		21.6	-3.62913
23.6	-1.41485		21.7	-3.49052
23.8	1.10729		21.8	-5.01858
23.9	1.90103		21.9	-4.562
24	0.989789		22	-3.95615
24.1	-0.63123		22.1	-3.43798
24.2	-0.542923		22.2	-4.10759
24.4	1.15171		22.3	-3.98066
24.5	1.85805		22.4	-3.8566
24.6	0.989789		22.5	-3.69779
24.7	-0.540571		22.6	-4.73055
24.8	-0.373479		22.7	-4.96777
24.9	-1.37614		22.8	-4.40625
25	-1.82288		22.9	-3.36361
25.1	-2.19749		23	-4.16018
25.2	-1.73239		23.1	-4.83579
25.3	-1.8004		23.2	-5.57943
25.4	-1.93814		23.3	-5.10954
25.5	-0.715147		23.4	-4.95078
25.6	1.22219		23.5	-4.6712
25.7	1.19906		23.6	-4.56075
25.8	-0.764711		23.7	-4.27711
25.9	-2.01992		23.8	-5.59131
26	-1.46664		23.9	-6.35157
26.1	-0.451612		24	-4.74963
26.2	0.217236		24.1	-3.64369
26.3	-1.32772		24.2	-4.44003
26.4	-1.70053		24.3	-5.37277
26.5	-1.15928		24.4	-4.38289
26.6	0.0656777		24.5	-3.72994
26.7	-1.37079		24.6	-4.71884
26.8	-0.595489		24.7	-5.64085
26.9	0.014018		24.8	-5.7646
27	0.123585		24.9	-5.16265
27.1	-0.926855		25	-5.75542
27.2	0.297729		25.1	-4.93684
27.3	1.40411		25.2	-4.72723
27.4	0.191813		25.3	-4.23735
27.5	-1.53355		25.4	-5.14063
27.6	-1.85306		25.5	-5.32025
27.7	-0.748043		25.6	-5.09045
27.8	1.01239		25.7	-4.36231
27.9	1.90334		25.8	-5.50308
28	3.02721		25.9	-6.11838
28.1	4.73027		26	-4.77022
28.2	5.72149		26.1	-3.02622
28.3	7.52316		26.2	-4.12214
28.4	9.28658		26.3	-5.17131
28.5	9.10714		26.4	-4.87092
28.6	6.68128		26.5	-4.13298
28.7	8.42063		26.6	-5.49408
28.8	8.47108		26.7	-5.94679
28.9	7.40519		26.8	-4.83764
29	6.16683		26.9	-3.99337
29.1	8.64844		27	-4.82351
29.2	9.36661		27.1	-5.37045
29.3	7.69514		27.2	-4.91477
29.4	5.71912		27.3	-4.7019
29.5	6.10806		27.4	-5.62835
29.6	7.32387		27.5	-6.04359
29.7	8.39929		27.6	-5.40304
29.8	8.1614		27.7	-3.76496
29.9	8.30512		27.8	-4.18271
30	7.4875		27.9	-4.50347
30.1	8.46791		28	-5.10039
30.2	8.6952		28.1	-3.64683
30.3	8.75725		28.2	-3.61224
30.4	7.92224		28.3	-2.77209
30.5	7.28339		28.4	-2.15662
30.6	6.60094		28.5	-0.822107
30.7	6.67706		28.6	-2.14437
30.8	8.28608		28.7	-2.81814
30.9	9.8024		28.8	-2.31241
31	8.93031		28.9	-1.5247
31.1	8.28846		29	-0.768615
31.2	9.73587		29.1	-1.34818
31.3	9.92313		29.2	-1.20773
31.4	7.98549		29.3	-0.636734
31.5	8.22764		29.4	-0.156807
31.6	9.53379		29.5	-0.972697
31.7	10.368		29.6	-1.52477
31.8	9.05637		29.7	-0.462534
31.9	9.79965		29.8	0.129044
32	10.3806		29.9	-0.753497
32.1	11.5255		30	-1.37317
32.2	10.1266		30.1	-0.734014
32.3	10.7397		30.2	0.0927643
32.4	11.1416		30.3	-1.13668
32.5	11.2174		30.4	-1.53637
32.6	10.3872		30.5	-0.415426
32.7	10.3069		30.6	1.20266
32.8	11.0304		30.7	-0.0525319
32.9	11.3902		30.8	-0.950128
33	10.779		30.9	-0.21179
33.1	9.61666		31	0.570687
33.2	10.113		31.1	-0.285732
33.3	10.1417		31.2	-0.598853
33.4	9.6898		31.3	0.153637
33.5	9.07069		31.4	0.911631
33.6	10.4065		31.5	-0.106195
33.7	9.38808		31.6	-0.695758
33.8	7.96926		31.7	-0.794696
33.9	8.25302		31.8	0.109132
34	9.42409		31.9	-0.187395
34.1	9.64501		32	0.290978
34.2	9.03512		32.1	0.203558
34.3	9.67407		32.2	0.527656
34.4	7.77729		32.3	-0.415003
34.5	7.12154		32.4	-0.548429
34.6	6.96158		32.5	-0.456153
34.7	6.63352		32.6	0.324906
34.8	4.21964		32.7	0.195927
34.9	3.48054		32.8	-0.0803489
35	3.51207		32.9	0.578788
35.1	2.87557		33	1.66587
35.2	3.27127		33.1	0.711264
35.3	5.17994		33.2	-0.219611
35.4	5.72918		33.3	-0.595706
35.5	3.98939		33.4	-0.0647029
35.6	3.58692		33.5	-0.802404
35.7	4.17877		33.6	-0.382222
35.8	4.43264		33.7	1.90416
35.9	2.93066
36	2.10024
36.1	3.05567
36.2	5.87266
36.3	6.15163
36.4	5.00675
36.5	2.96179
36.6	2.75922
36.7	2.28033
36.8	2.72483
36.9	2.62817
37	2.11888
37.1	2.25097
37.2	3.42136
37.3	3.76431
37.4	2.78619
37.5	2.27397
37.6	3.90366
37.7	5.19284
37.8	4.27337
37.9	2.21387
38	1.25991
38.1	1.63258
38.2	1.72308
38.3	2.01352
38.4	1.65455
38.5	1.86852
38.6	1.23294
38.7	1.27514
38.8	2.10292
38.9	2.1569
39	2.4273
39.1	2.06947
39.2	2.58341
39.3	1.01895
39.4	1.04475
39.5	1.42847
39.6	3.42328
39.7	3.21605
39.8	2.2219
39.9	1.42223
40	0.419867
40.1	-0.384925
40.2	0.23279
40.3	2.15185
40.4	1.95786
40.5	1.79874
40.6	1.59175
40.7	1.16208
40.8	0.276228
40.9	0.856448
41	1.73544
41.1	1.27282
41.2	-0.934061
41.3	-1.33967
41.4	-0.438524
41.5	2.32415
41.6	3.95434
41.7	2.64735
41.8	0.271445
41.9	-0.483944
42	-0.53172
42.1	-1.57322
42.2	-1.60441
42.3	0.697721
42.4	1.41968
42.5	0.356088
42.6	-0.73032
42.7	0.769625
42.8	0.999727
42.9	-0.211814
43	0.170706
43.1	1.66914
43.2	1.01723
43.3	0.663741
43.4	-0.135293
43.5	-0.324444
43.6	-1.09935
43.7	0.428797
43.8	0.289659
43.9	1.36196
44	0.583597
44.1	0.505302
44.2	-0.761171
44.3	-0.333183
44.4	-0.0340263
44.5	0.140285
44.8	-1.12394
44.9	-1.07957
45	0.0143286
45.1	0.6647
45.2	0.968523
45.3	1.07213
45.4	0.230176
45.5	-0.224044
45.6	-0.157305
45.7	0.364451
45.8	1.39203
45.9	0.520539
46	1.54823
46.1	1.45651
46.2	0.867956
46.3	-1.95316
46.4	-0.526288
46.7	0.494235
46.8	0.411988
46.9	-0.224044
47	-0.157305
47.1	0.364451
47.2	1.14815
47.3	1.89469
47.6	1.30199
47.7	0.148096
47.8	-0.224044
47.9	-0.157305
48	0.364451
48.1	1.39203
48.2	0.520539
48.3	1.54823
48.4	1.45651
48.5	0.867956
48.6	-1.95316
48.7	-0.526288
49	0.494235
49.1	0.411988
49.2	-0.224044
49.3	-0.157305
49.4	0.364451
49.5	1.39203
49.6	0.520539
49.7	1.54823
49.8	1.45651
49.9	0.867956
50	-1.77725
50.1	-0.996883
50.2	-1.31874
50.3	-1.94246
50.6	-2.24037
50.7	-0.779418
50.8	0.0143286
50.9	0.6647
51	0.968523
51.1	1.07213
51.2	0.230176
51.3	-0.224044
51.4	-0.157305
51.5	0.364451
51.6	1.39203
51.7	0.959486
51.8	-0.301402
51.9	-0.78756
52	-0.0296664
52.1	0.507845
52.2	0.847171
52.5	0.148091
52.6	-1.32568

## Sheet: Fig 2h
T84_ACh	T84_Pilo		E175_ACh	E175_Pilo		F181_ACh	F181_Pilo		F188_ACh	F188_Pilo		A414_ACh	A414_Pilo		P415_ACh	P415_Pilo		N419_ACh	N419_Pilo
3.48512	2.73776		6.99654	2.41501		-5.16485	-7.01933		-10.2158	-13.0577		-19.6797	-2.44723		-11.8736	-6.25171		-9.68743	-8.20581
6.21673	3.19163		5.56707	3.2729		-6.30238	-7.30125		-10.78	-15.2674		-18.9715	-2.73111		-12.5215	-6.95093		-8.00578	-6.49931
8.37791	3.906		6.77433	4.16293		-6.67927	-8.28892		-11.8094	-14.3182		-20.7629	-2.93552		-14.8643	-8.81439		-16.3366	-3.97056
11.8372	4.35042		8.51273	5.59553		-6.80228	-8.07227		-6.20159	-12.6742		-18.8493	-2.7221		-14.6258	-7.77451		-13.8279	-3.90337
10.2529	3.25227		6.87476	4.53803		-7.48319	-8.73475		-9.31913	-12.4506		-18.4634	-2.76892		-16.5295	-7.22029		-11.8641	-4.3516
12.3561	3.4686		7.51375	6.04584		-5.37167	-11.0336		-9.79796	-10.9699		-14.3318	-1.52719		-9.87562	-8.67737		-13.8155	-11.7413
10.8278	4.85614		6.37494	5.20908		-7.32969	-12.3319		-11.0649	-15.7171		-20.7944	-2.97428		-9.89041	-6.62329		-7.44959	-8.03216
12.7721	3.20822		8.2022	6.28337		-7.10926	-10.3077		-9.99918	-14.4868		-16.7001	-2.79201		-9.61483	-6.33685		-13.5942	-12.0558
10.1195	6.65668		8.0309	5.80063		-6.46175	-11.886		-6.27263	-9.22884		-18.0851	-3.33153		-9.91039	-7.53217		-15.7087	-13.0185
10.4374	6.91094		5.7278	4.69238		-6.28839	-9.90061		-6.5182	-11.0983		-20.2631	-3.43218		-10.8527	-6.44844		-11.604	-9.31464
10.9273	8.31003		9.11364	6.98519		-7.51023	-13.1039		-6.85369	-9.13237		-17.3517	-3.62281		-9.17455	-6.23651		-11.2419	-9.26223
7.96611	5.76116		9.76486	4.30367		-6.98233	-8.74925		-6.95133	-10.4691		-18.8967	-3.73726		-10.2716	-6.27506		-16.6907	-13.1511
10.9438	7.20942		11.5522	5.08763		-7.16026	-8.81255		-7.00724	-11.5045		-13.5901	-7.22626		-10.5762	-3.51687
10.0855	6.89692		9.75217	3.74944		-6.39793	-7.2895		-13.6573	-17.4165		-9.7396	-5.31124		-19.1206	-11.2519
12.4652	7.22214		10.5587	4.81483		-5.67272	-8.45707		-12.3914	-15.7612		-10.9825	-6.55963		-16.3198	-8.92012
10.6954	6.22148		12.0269	5.79801		-6.65961	-7.25037		-9.85235	-13.9193		-13.6269	-8.39801		-11.1396	-5.56601
7.97278	4.38619		11.1924	4.81342		-6.64731	-12.8892		-10.5002	-12.6712		-14.2587	-8.63759		-14.0677	-10.8414
6.64885	5.23091		11.6693	5.80934					-4.141	-9.53019		-14.8057	-8.4641		-16.347	-12.7099
5.29262	2.98616		10.516	5.02536					-5.68325	-10.1562		-16.3592	-5.47989		-20.0055	-16.4243
2.92473	1.26464		10.2289	4.29939					-8.36577	-6.99387		-14.4106	-4.49533		-21.2522	-14.3266
4.89546	1.59456		10.6461	5.65043					-8.63198	-5.39294		-13.3451	-5.07487		-23.0315	-12.667
10.7547	6.77676		11.1963	4.23121					-6.48368	-4.40982		-11.6673	-3.04189		-21.6796	-15.4209
3.06275	3.14068		9.86951	4.4305					-12.1755	-9.4974					-17.5163	-12.6949
8.80482	6.90675		6.75608	3.77918					-3.14162	-5.67619					-17.9354	-12.8109
10.3747	8.03453		5.13575	3.11117					-3.95744	-8.61425					-19.1564	-8.6531
8.85098	7.04302								-3.39315	-7.39319					-19.7632	-10.1755
8.35011	5.88217								-2.90493	-5.46505					-16.3439	-6.57769
7.52146	5.89121														-18.6514	-8.47769
13.0523	4.62854														-19.6009	-9.26787
14.6826	5.0936														-24.201	-9.55236
12.8854	4.31607														-22.7497	-10.3637
11.6302	4.20011														-22.7923	-11.0938
12.3465	3.87469														-24.1365	-11.3151
12.1772	3.54821														-26.1213	-11.5611
12.7404	4.30646														-15.114	-8.88093
15.1792	4.39171														-19.1206	-11.2519
14.6288	4.64002														-16.3198	-8.92012
14.1802	4.37444														-11.1396	-5.56601
19.9672	8.92115														-14.0677	-10.8414
															-16.347	-12.7099
															-15.4316	-13.1319
															-19.1735	-14.0645
															-16.0598	-12.9139

[truncated: 2 more sheets: Fig 2h - Statistics, Fig 2i]
