# Supplementary material for: Ligand-specific activation trajectories dictate GPCR signalling in cells
Source: Nature. 2026 Jan 14;650(8103):1053–62. doi: 10.1038/s41586-025-09963-3 (PMC12935549; doi:10.1038/s41586-025-09963-3)
Supplement: Supplementary file 10 — Source Data Fig. 3 [file 41586_2025_9963_MOESM10_ESM.xlsx]

## Sheet: Fig 3a
Time (s)	E175_Ixo_GoA	E175_ACh_GoA	E175_Arec_GoA	E175_Pilo_GoA		E175_Ixo_endo	E175_ACh_endo	E175_Arec_endo	E175_Pilo_endo
0	0.0645576	0.756967	0.272197	0.0100903		-1.19122	-0.287155	1.04306	1.7231
0.1	-0.0837821	0.0306982	-0.34313	-0.546181		-1.1291	-0.972909	0.355334	0.270989
0.2	0.67657	-0.331956	-0.911042	0.121181		-0.546668	-1.01856	-0.55045	-0.0359327
0.3	0.502861	-0.0694416	-0.550165	0.514823		1.02628	0.396356	-1.60494	-0.72391
0.4	0.0372178	0.445943	-1.16776	0.768366		1.53946	-0.622405	0.278112	-0.131954
0.5	0.696583	0.142398	0.0501031	1.35798		0.164099	1.094	0.382976	-0.52062
0.6	-0.186561	0.789733	1.49049	0.489054		-0.693985	0.602284	-1.2663	-0.437657
0.7	-0.929262	-0.608482	0.726587	-1.0933		-0.560185	-0.354116	0.0931005	-0.517106
0.8	0.123406	-0.864124	0.500477	-0.254699		1.24225	1.35489	-0.17302	-0.441818
0.9	0.163439	0.858437	1.79698	-0.617757		0.149064	-0.192379	-1.36331	-0.0128699
1	1.05829	2.41023	0.771993	-0.366945		0.846466	-0.613208	0.412618	0.189318
1.1	3.44556	2.62191	1.95002	-0.0663471		-0.146482	2.09392	-0.0493172	0.628826
1.2	1.92812	2.01204	-0.414516	-1.879		0.44871	1.18945	-0.798319	0.29456
1.3	2.36084	0.157684	-1.03703	-1.48196		0.968572	1.55128	0.356895	-0.048919
1.4	1.82395	1.47267	-1.51398	-1.48065		-0.242162	0.616977	-0.215122	-0.62574
1.5	0.98934	1.65511	-0.582222	-1.12009		1.65215	0.21185	0.0483753	-0.684802
1.6	0.0749162	0.831169	-0.481208	-0.960343		0.484856	-0.0141548	0.580257	-0.396191
1.7	-0.318573	-0.625866	2.0353	-1.54249		2.05067	2.281	-0.493087	-0.0949386
1.8	-1.89745	-2.09578	1.97498	-1.95726		-1.41766	-0.237804	0.0292061	0.792341
1.9	-0.224073	-2.80189	2.24456	0.244912		-1.17679	0.116177	-0.260331	0.115472
2	0.413132	-0.359688	1.98464	1.1565		2.8275	1.00438	-1.25518	0.646701
2.1	1.98944	0.29199	1.67368	1.43303		-0.70249	0.902652	0.143316	-0.391062
2.2	3.17877	1.12256	-0.954061	0.366795		1.9313	-0.550959	-0.174276	-0.700478
2.3	3.10632	2.00298	0.389654	-0.921829		0.683506	1.80039	-1.12661	-1.08645
2.4	2.42596	3.55721	0.832038	-2.36473		-0.749267	2.70206	0.49046	-0.678265
2.5	1.20329	3.27869	0.435617	-2.06959		1.85809	1.86758	0.515152	-0.324984
2.6	-0.867034	2.50866	2.18783	-2.14059		0.314757	-0.337067	-0.269006	-0.185962
2.7	-1.20732	0.218846	0.665823	-3.70356		1.12682	1.22108	0.508418	0.151801
2.8	0.0968305	-1.3579	-1.02244	-2.62472		0.441116	0.693134	-0.842635	-0.567914
2.9	1.06716	-1.42222	-0.354607	-2.98912		0.18035	1.43351	-1.14401	0.246742
3	1.29948	-0.249984	-0.650759	-2.69869		0.184754	0.39658	-0.254055	0.174
3.1	-0.583124	0.76714	0.334643	-0.724873		3.21645	0.558092	-0.700201	0.143038
3.2	-2.65631	0.904583	2.0697	-0.203106		1.34598	2.57834	-0.664077	-0.318958
3.3	-1.85372	-0.961088	1.43426	-0.347481		3.1519	1.142	-0.275261	-0.574298
3.4	0.880643	-2.08311	1.98317	0.103795		2.36186	-1.16235	-1.48251	-0.801019
3.5	3.11073	-1.59278	1.83248	-2.40003		0.417272	1.42286	-0.38643	-0.879484
3.6	3.97329	-0.996462	1.20215	-2.06453		-0.25902	1.78222	-0.608007	-0.0265585
3.7	2.37571	-0.235107	0.520148	0.0917603		0.96918	0.128963	-1.93281	-0.484065
3.8	0.698595	1.05354	1.14115	-0.275916		1.61525	0.945834	-0.999876	-0.150721
3.9	0.165579	-0.784038	1.89173	-0.293333		-0.800145	-2.17304	-0.915883	-0.559367
4	-0.396823	-1.23747	1.52316	-0.982874		0.968876	1.355	-1.79067	-0.507506
4.1	-1.07387	-0.4975	0.843053	-2.11483		2.57949	1.79546	-0.39542	-0.712997
4.2	-0.531315	-0.0344324	0.68894	-0.714135		1.48737	1.28097	-0.252564	-0.589745
4.3	-0.764866	0.317392	0.00422183	1.02518		0.08148	0.137039	-1.10443	-0.478925
4.4	0.0366404	1.02011	1.35136	0.87268		1.17542	1.88474	0.0446819	-0.980729
4.5	0.270549	-0.987336	1.32253	1.15538		2.42428	0.176295	-0.523134	-0.234429
4.6	-0.655346	-1.66728	2.48995	0.317092		-1.22676	0.116177	-1.23421	-0.590081
4.7	0.151671	-1.702	1.52207	-0.6442		-0.592534	0.652644	-0.493794	-1.03966
4.8	0.157946	-1.18079	1.38518	-1.26006		1.06972	1.51146	-1.14388	-1.12954
4.9	0.321942	0.187589	-0.00379585	-1.42792		1.64562	1.56575	-0.793506	-1.0774
5	0.878596	1.33608	0.293265	-0.487392		1.80706	-0.597618	-0.0539525	-0.922696
5.1	0.362528	2.08021	-0.72323	0.112269		2.23398	-0.244534	-1.28152	-0.263203
5.2	-1.24241	0.627291	0.420531	-0.300631		1.38881	-1.37478	-0.834934	-0.0112232
5.3	-1.20488	0.63071	0.191383	0.0411498		-1.63742	-1.5271	-0.869588	-1.07011
5.4	-1.64885	0.184464	-0.157217	-0.0333317		3.64655	0.478345	-2.56728	0.941562
5.5	-0.335801	1.91448	-0.207969	-0.187664		3.42148	2.78629	-1.48209	1.91224
5.6	0.536501	0.848482	0.535831	-0.129513		4.8014	6.35504	-1.57747	3.37866
5.7	-0.0545149	-0.0793205	-1.71144	-1.04192		6.59199	6.73784	-3.24146	4.59947
5.8	-0.867543	-2.33131	-2.63284	-2.02726		4.83785	7.47441	-2.73454	5.00978
5.9	-1.3386	-2.21276	-2.68273	-1.05508		8.72732	8.15242	-3.02722	4.78327
6	-0.942864	-2.63402	-1.68485	1.14183		5.7295	6.88657	-4.41498	5.16247
6.1	-0.238711	0.41982	-0.590443	1.63989		7.1732	8.1937	-3.19833	5.53767
6.2	-0.406044	0.591242	1.11327	1.23985		7.67697	6.77082	-3.50793	4.98147
6.3	-2.13507	1.97085	0.724674	-0.517403		9.02105	8.99071	-2.9987	5.02578
6.4	-2.62219	2.36988	0.28286	-2.08374		8.36268	10.4416	-3.39344	5.09628
6.5	-2.31957	1.64661	-0.256753	-1.62166		9.29913	10.3843	-4.45593	5.08417
6.6	-0.991804	0.0715472	1.37624	-0.198599		8.87388	7.89681	-4.57199	5.3048
6.7	0.295155	0.0738368	1.60897	0.695863		11.4155	12.3663	-3.71082	5.39661
6.8	1.42352	-1.74713	1.68073	1.01941		11.6614	10.2834	-4.3659	6.08619
6.9	1.24505	-1.31886	1.97728	1.92846		8.95437	9.59728	-2.33167	5.44015
7	0.970541	-0.634672	2.33696	1.92272		8.67523	11.1816	-2.9814	6.34546
7.1	0.826804	-1.09356	2.96816	2.68869		10.151	9.04141	-4.33198	5.43333
7.2	0.0215781	-0.09512	3.35844	2.49101		9.55382	10.7276	-3.08975	5.04485
7.3	-0.229277	0.737051	4.5054	2.10994		10.2816	11.2475	-2.81569	4.76692
7.4	-0.239025	-0.610532	1.84936	0.607222		9.51631	12.2784	-3.87581	5.24439
7.5	-0.199178	-0.849509	0.75045	0.192835		11.976	10.3328	-2.65151	5.35408
7.6	-0.271773	-0.807847	0.893099	-0.268686		8.5229	10.6978	-3.01248	5.58234
7.7	0.85467	-0.531821	1.37978	-0.0726537		10.3578	12.8863	-4.25841	5.82974
7.8	0.980535	0.464553	0.945275	0.241214		10.808	13	-2.88089	5.05769
7.9	-0.753183	1.66185	2.35627	1.38811			13.5976	-3.07202	5.98088
8	-2.4202	0.00291613	1.34832	1.69519			9.58898	-3.87589	5.51484
8.1	-2.49083	-1.8692	2.53469	0.33228		9.56035	10.9625	-4.09412	5.22935
8.2	-2.2151	-2.55729	1.38328	0.223404		9.36641	11.5978	-3.82742	4.92969
8.3	-0.229345	-2.31875	0.0949261	0.0444784			11.8013	-4.21777	5.04876
8.4	0.883725	-0.18097	-1.25702	-0.335737			13.3482	-3.69706	5.21427
8.5	-0.0735169	1.28708	-2.11113	0.336107		8.01762	12.4114	-2.88463	5.15546
8.6	-1.84872	0.313433	-1.19568	1.03937			11.1327	-3.07202	5.88606
8.7	-2.36319	0.988344	1.21382	0.442597			10.0804	-3.76636	5.2669
8.8	-1.99902	0.458475	1.59015	1.23264		10.9667	13.956	-3.91495	5.33852
8.9	-1.14272	-0.1268	2.44571	1.91054		9.94945	12.2299	-4.69996	5.47724
9	-0.337779	0.268184	2.14823	1.92501			12.7751	-5.91462	5.53715
9.1	-0.789854	-0.945922	1.03434	2.30518		10.238	11.2647	-4.20399	5.29929
9.2	-3.12929	-2.15493	0.165064	2.27556		9.12007	11.0488	-3.84875	5.75023
9.3	-3.13491	-0.682095	-0.448648	1.76449		7.73514	12.6858	-3.69706	4.86777
9.4	-2.36587	-0.438621	-1.16031	1.80885			11.0666	-2.99416	4.98927
9.5	-2.12916	0.994264	0.21549	1.96186		9.12007	11.6	-3.25119	5.15346
9.6	-1.16916	1.49572	0.0876546	0.938923		7.73514	14.6681	-3.00334	5.40172
9.7	0.00418078	0.272328	1.51298	1.19757			10.565	-2.39727	5.618
9.8	-0.188616	-0.508292	2.04278	1.37532		10.9667	12.7128	-2.96866	5.93755
9.9	0.412334	-0.0694416	2.76458	0.522446		9.94945	11.8973	-4.31019	5.18444
10	0.0685907	0.445943	0.628394	-1.50019			10.6574	-3.17457	6.10948
10.1	-1.92633	0.142398	0.80131	-1.04253		10.238	12.585	-3.81085	5.20058
10.2	-1.42285	0.789733	-1.69015	-0.299541		9.12007	13.7683	-3.58117	5.8052
10.3	0.186831	-0.608482	-1.86748	1.15204		7.73514	12.7677	-3.48896	4.88197
10.4	0.570047	-0.864124	-1.24613	2.59557			13.7014	-3.56514	5.86098
10.5	0.993857	0.858437	-1.60222	2.06299		9.12007	11.818	-4.29689	4.8667
10.6	1.27178	2.41023	-1.0113	-0.118424		7.73514	8.96469	-2.65437	6.1347
10.7	0.886476	2.62191	1.91693	-0.998407			12.751	-3.17769	5.61655
10.8	1.66442	2.01204	1.86845	-1.92961		8.01762	12.8438	-2.72904	5.03438
10.9	1.79738	0.157684	2.00328	-3.01566			11.5088	-2.55073	4.92733
11	2.02741	1.47267	1.87953	-2.81933		10.238	12.1621	-3.1381	4.68725
11.1	1.68239	1.65511	-0.607863	-1.40464		9.12007	12.1899	-2.64347	4.69205
11.2	2.04704	0.831169	0.806411	0.637939		7.73514	12.1736	-2.11277	5.35469
11.3	2.08497	-0.625866	2.51627	2.08981		10.5486	11.0808	-3.41961	5.86098
11.4	0.162777	-2.09578	1.98018	1.68594		9.04125	13.0533	-2.11416	4.8667
11.5	-1.52729	-2.80189	1.42691	-0.65127		8.5106	11.6907	-2.21102	6.06605
11.6	-1.57064	-0.359688	1.19675	-0.913941		13.0603	12.0058	-3.38973	5.24679
11.7	-1.55709	0.29199	0.576828	-0.543034		8.9161	15.2022	-2.22393	6.3815
11.8	-0.357664	1.12256	0.203972	0.394101		8.55449	12.3211	-2.51683	5.51064
11.9	0.978658	2.00298	0.759363	2.36798		10.7433	11.4266	-3.55427	6.27445
12	0.272035	3.55721	0.150901	2.91025		9.51965	13.017	-2.12998	5.30245
12.1	-1.25478	3.27869	0.184911	0.550703		10.2814	12.4116	-1.93909	5.12045
12.2	-1.71843	2.50866	0.57265	0.768867		8.59869	12.8402	-3.21971	5.03853
12.3	-0.955761	0.218846	1.77815	0.124261		8.80174	14.0633	-2.53305	5.53888
12.4	-0.891648	-1.3579	1.61302	1.25627		10.3452	12.0325	-3.43656	5.90836
12.5	-0.982642	-1.42222	3.08574	0.809711		8.73765	15.5262	-2.8172	6.20652
12.6	-2.11928	-0.249984	2.89664	0.0786985		11.6893	14.0877	-1.92549	6.60201
12.7	-3.35793	0.76714	1.46062	-1.23287		8.24057	12.5311	-3.00211	5.74935
12.8	-3.27904	0.904583	0.346879	-1.085		8.97518	13.0557	-2.71404	6.22485
12.9	-1.38281	-0.961088	0.131799	-1.53569		8.7214	12.8908	-2.33992	5.82327
13	-0.631546	-2.08311	-0.156729	0.513589		9.94535	14.0602	-4.1451	5.32821
13.1	-0.177315	-1.59278	0.681045	0.0146505		8.88497	13.1677	-3.30534	4.96152
13.2	-0.934832	-0.996462	0.19008	-0.163915		8.83029	14.5116	-3.23342	5.04481
13.3	-0.440609	-0.235107	-0.00266985	0.189159		8.76423	13.7419	-4.36328	5.23286
13.4	-0.307077	1.05354	-0.287237	-0.797377		11.3869	14.6012	-2.66259	5.30708
13.5	0.457809	-0.784038	-0.979946	-1.11955		10.3489	12.414	-2.52485	5.84056
13.6	1.21886	-1.23747	-0.712377	0.196466		11.1146	11.8692	-4.00205	5.10874
13.7	2.75753	-0.4975	0.14036	0.588517		10.6136	11.9722	-2.76002	4.85243
13.8	1.79529	-0.0344324	0.693309	0.517931		9.20679	11.0443	-2.36346	4.22598
13.9	1.90604	0.317392	0.854246	1.50704		11.7487	9.9424	-2.89377	4.12327
14	1.26576	1.02011	1.42328	-1.13329		9.6413	8.80901	-2.30477	4.09763
14.1	0.430342	-0.987336	0.533606	-2.00408		10.4193	11.3623	-2.89882	4.24445
14.2	-0.975315	-1.66728	0.997058	-1.42241		7.9631	7.4522	-2.83053	5.37377
14.3	-0.0708084	-1.702	1.83575	-1.2212		9.53377	9.62072	-1.72001	4.91601
14.4	-0.526008	-1.18079	1.88367	-1.45067		9.64251	5.78806	-2.97643	5.59289
14.5	0.559145	0.187589	-0.294657	-0.927366		6.94099	5.79973	-2.62425	5.02883
14.6	2.42797	1.33608	-0.234152	-3.22156		4.12784	5.26741	-3.06034	4.48703
14.7	1.13478	2.08021	-0.870303	-4.80307		7.71706	6.14877	-4.27254	3.62799
14.8	-0.853856	0.627291	-0.645645	-3.257		4.47973	4.75965	-2.81289	3.82066
14.9	-0.273616	0.63071	-0.620384	-1.51952		4.17371	3.27924	-2.56346	3.90705
15	-0.217985	0.184464	-0.561615	-0.996815		7.2947	3.3425	-3.58274	4.03893
15.1	0.862821	1.91448	-0.855244	-1.00467		5.64551	3.20801	-1.5771	4.80201
15.2	2.76334	0.848482	-0.00612925	-1.55307		3.99647	2.29592	-2.02847	4.20265
15.3	2.66688	-0.0793205	0.314483	-1.23622		2.34834	0.488216	-3.55517	4.88035
15.4	2.87202	-2.33131	-0.54501	0.753046		2.52846	1.3827	-2.50744	4.34156
15.5	2.32962	-2.21276	-0.348285	2.18519		2.26967	5.25844	-3.03167	4.19815
15.6	0.751245	-2.63402	-0.176346	2.63081		4.44328	1.85266	-3.62812	3.95639
15.7	-1.54419	0.41982	0.412459	2.31033		2.80548	0.641877	-2.1038	3.86226
15.8	-1.43275	0.591242	1.38183	0.588365		1.94876	2.27652	-2.64406	3.72053
15.9	-0.363115	1.97085	1.27533	-0.542028		1.64988	3.03641	-2.24877	3.92858
16	0.627121	2.36988	0.632504	-0.291844		1.56756	1.25248	-1.27716	4.364
16.1	-0.712895	1.64661	-0.261176	1.01881		-0.307771	1.61162	-2.60861	4.04485
16.2	-1.03577	0.0715472	-2.19462	2.04721		0.953537	1.2001	-2.00619	4.27466
16.3	-1.60499	0.0738368	-2.29428	3.26488		0.794677	-0.447209	-1.3715	3.90727
16.4	-1.32021	-1.74713	-1.89925	1.60086		1.46474	3.02441	-2.83918	3.99916
16.5	-1.91147	-1.31886	-1.03049	-0.246773		-0.212243	1.082	-1.78963	4.25282
16.6	-1.78592	-0.634672	0.458693	0.225642		0.135091	-2.68135	-2.14346	4.37029
16.7	-1.91607	-1.09356	0.730317	1.6598		1.54645	-0.577317	-3.93535	4.56906
16.8	-0.822127	-0.09512	1.59971	2.62536		-2.2557	-2.46802	-2.55392	3.91969
16.9	0.690096	0.737051	1.37755	4.77567		0.420613	1.08491	-2.57272	4.74171
17	2.19115	-0.610532	2.44168	5.3021		-0.546212	-0.263153	-3.71284	4.32056
17.1	2.13175	-0.849509	0.0636422	4.75039		-0.666648	1.03994	-2.15825	3.77563
17.2	2.07217	-0.807847	-1.02286	3.21175		2.09031	0.286325	-1.60477	3.44041
17.3	2.30183	-0.531821	-1.67062	2.53497		1.85718	2.11433	-2.63864	3.52636
17.4	0.199457	0.464553	0.441152	1.02783		-0.618504	1.77033	-1.51357	3.93472
17.5	-1.23707	1.66185	1.52312	0.399159		-0.295925	1.68666	-2.48025	4.50437
17.6	-0.686438	0.00291613	4.86515	0.471116		0.422739	2.6905	-2.28641	4.88829
17.7	-0.529149	-1.8692	3.71268	0.350801		3.52187	-0.791096	-1.4298	3.88046
17.8	0.201562	-2.55729	2.86054	0.552201		2.54183	1.59457	-1.88781	3.97491
17.9	1.14724	-2.31875	0.0354243	0.252032		-0.184754	3.44961	-1.98586	3.84269
18	0.896478	-0.18097	-1.13334	0.653822		1.32654	-0.133494	-1.23124	3.95477
18.1	0.778365	1.28708	-2.00371	0.550367		-0.739851	1.78536	-2.31468	3.89166
18.2	0.349664	0.313433	-0.975075	1.05641		-0.821103	0.116177	-0.913168	4.07417
18.3	-0.853067	0.988344	-0.287155	1.34749		-0.796651	1.94239	-0.951437	4.13959
18.4	-0.137197	0.458475	0.0497775	1.48253			0.0312706	-2.69458	3.5557
18.5	0.327699	-0.1268	-0.173863	-0.474709		0.314757	-1.92908	-1.88145	4.27974
18.6	0.285687	0.268184	1.32208	0.0633157		-3.26626	2.45261	-2.0442	3.8084
18.7	-0.443836	-0.945922	1.38166	-0.756544		0.557451	2.34426	-2.75485	3.61439
18.8	-0.526551	-2.15493	2.34476	-0.807243		1.54341	0.49416	-1.69577	3.42207
18.9	-1.00392	-0.682095	1.52301	-1.17615		0.504295	0.808997	-2.0395	3.54777
19	-0.296362	-0.438621	-0.476961	-0.716511			0.542614	-1.8989	3.61119
19.1	-1.07837	0.994264	-1.30145	0.278708		-0.132509	-1.28393	-0.91623	3.79477
19.2	-2.43777	1.49572	0.582255	3.02993			0.687302	-1.61948	4.3817
19.3	-3.5943	0.272328	0.464988	4.44957		-0.739851	-0.610292	-0.787168	3.62983
19.4	-2.59365	-0.508292	0.151782	5.60867		-0.821103	2.69712	-0.638731	4.34208
19.5	-1.25268	-0.0694416	-0.0882461	3.61283		-0.796651	1.07403	-1.94318	3.90764
19.6	-0.694818	0.445943	-0.947427	1.98316			-0.777749	-0.443793	3.61365
19.7	0.675161	0.142398	-0.646228	1.29769		0.314757	-1.34158	-0.265073	3.34963
19.8	-0.792478	0.789733	0.517666	0.338472		-3.26626	0.764581	-1.52667	3.61187
19.9	-0.584075	-0.608482	0.37701	-0.974315		0.557451	1.18833	-0.225149	3.71657
20	-0.930119	-0.864124	2.54316	-1.01544		1.54341	2.22414	-0.599769	3.58004
20.1	0.407757	0.858437	4.39426	-0.705656		0.504295	1.51808	-1.99335	4.21004
20.2	-0.11923	2.41023	3.59533	1.75544			2.53976	-0.641731	3.60031
20.3	2.41263	2.62191	2.56846	3.53532		-0.132509	1.99477	-0.177065	4.54106
20.4	0.297294	2.01204	1.2777	3.62819			-1.23828	-1.26262	3.9737
20.5	-0.208255	0.157684	0.0846564	2.04166		-1.19122	0.0629001	-0.348319	3.5822
20.6	-1.51898	1.47267	1.66391	0.528558		-1.1291	1.79646	-0.828981	2.87751
20.7	-0.787511	1.65511	1.36696	0.218725		-0.546668	-0.25676	-0.572639	2.92575
20.8	-0.925169	0.831169	-0.191255	1.36369		1.02628	-2.98766	0.430808	3.23749
20.9	0.503948	-0.625866	0.384607	1.5066		1.53946	-1.69018	-0.216254	3.37999
21	1.28447	-2.09578	0.647319	2.09767		0.164099	0.601499	-0.192995	3.54242
21.1	0.657484	-2.80189	0.214215	1.00398		-0.693985	1.45572	-0.199316	2.89287
21.2	0.560291	-0.359688	0.282195	1.24655		-0.560185	-0.491289	-1.46941	3.68661
21.3	0.138358	0.29199	1.19058	0.852553		1.24225	0.791388	0.383559	2.78452
21.4	-1.97953	1.12256	0.262389	2.09512		0.149064	-1.90329	0.831402	2.84472
21.5	-2.82187	2.00298	1.32471	3.21376		0.846466	0.663187	-0.422384	2.75754
21.6	-1.89448	3.55721	2.0773	4.75102		-0.146482	-1.29549	1.06646	2.67345
21.7	-2.11249	3.27869	1.42947	2.6933		0.44871	0.116177	0.336879	2.90487
21.8	0.130054	2.50866	0.705803	2.21677		0.968572		-1.13584	3.1471
21.9	2.1171	0.218846	2.04542	1.38935		-0.242162	-0.287155	0.019795	3.27977
22	1.73492	-1.3579	0.925591	1.66497			-0.972909	-0.0485488	2.76616
22.1	2.48191	-1.42222	1.78074	1.99757		-0.821103	-1.01856	-1.59974	2.7494
22.2	2.33515	-0.249984	3.06051	5.05649		-0.796651	0.396356	-0.403554	2.39395
22.3	2.42611	0.76714	1.53523	3.91497			-0.622405	-0.721779	2.21724
22.4	1.41575	0.904583	0.487101	2.3468		0.314757	1.094	-0.00781432	2.67133
22.5	0.545543	-0.961088	0.549736	1.29703		-3.26626	0.602284	0.960306	3.3612
22.6	0.19966	-2.08311	-0.191703	0.624058		0.557451	-0.354116	0.173082	3.91224
22.7	0.703936	-1.59278	0.749432	-0.0248512		1.54341	1.35489	-0.328038	2.8901
22.8	1.7295	-0.996462	1.00985	0.779765		0.504295	-0.192379	0.0195678	3.33785
22.9	4.56861	-0.235107	-0.28493	1.82789			-0.613208	-0.850972	2.47338
23	3.91078	1.05354	-0.175477	1.19187		-0.132509	2.09392	0.686923	2.27368
23.1	1.94173	-0.784038	-1.55775	1.47748			1.18945	0.583657	2.34542
23.2	0.767743	-1.23747	-2.35094	0.352295		-0.739851	1.55128	-0.915874	2.49481
23.3	-0.754873	-0.4975	-1.70228	-1.40702		-0.821103	0.616977	0.192826	2.40032
23.4	-1.45093	-0.0344324	-0.160622	-2.47675		-0.796651	0.21185	-0.107304	2.68904
23.5	-1.11972	0.317392	-0.44017	-0.805407			-0.0141548	-1.53207	3.41577
23.6	-1.31947	1.02011	0.722883	0.501059		0.314757	2.281	0.084966	2.92469
23.7	-2.21092	-0.987336	0.0946141	2.23778		-3.26626	-0.237804	0.163985	4.19546
23.8	-1.21596	-1.66728	-0.840063	1.64583		0.557451	0.116177	-0.898102	3.56194
23.9	-0.0189137	-1.702	-0.855475	0.823476		1.54341	1.00438	0.204269	2.91705
24	0.292387	-1.18079	-0.655711	0.946265		0.504295	0.902652	-0.345493	2.4383
24.1	0.514739	0.187589	-2.93294	0.969278			-0.550959	-0.748471	2.52584
24.2	-0.501886	1.33608	-1.83963	0.578803		-0.132509	1.80039	0.458678	2.91177
24.3	-0.76344	2.08021	-0.506861	-1.02409			2.70206	-0.450192	3.40786
24.4	0.784172	0.627291	1.13073	-0.610975		-1.19122	1.86758	-0.142259	3.80428
24.5	2.72234	0.63071	2.15831	0.522522		-1.1291	-0.337067	0.403847	2.63318
24.6	3.37181	0.184464	2.92422	2.10818		-0.546668	1.22108	-0.755304	3.0996
24.7	3.78127	1.91448	2.62876	3.05473		1.02628	0.693134	-0.0102972	2.51493
24.8	2.35576	0.848482	1.7353	2.03354		1.53946	1.43351	-0.215808	2.26483
24.9	0.782262	-0.0793205	0.561593	-0.0624075		0.164099	0.39658	-1.73721	2.13927
25	0.0702039	-2.33131	1.11118	0.0818792		-0.693985	0.558092	0.17773	2.48822
25.1	0.112402	-2.21276	-1.76328	0.634153		-0.560185	2.57834	0.356197	2.80265
25.2	0.75645	-2.63402	-1.84302	-0.260339		1.24225	1.142	-0.907294	2.9796
25.3	2.20358	0.41982	-1.38581	-0.0892066		0.149064	-1.16235	0.437922	3.67027
25.4	3.13105	0.591242	-2.45235	-0.284503		0.846466	1.42286	0.0103344	2.88006
25.5	2.96109	1.97085	-0.879921	-0.912377		-0.146482	1.78222	-1.30621	2.46239
25.6	1.77272	2.36988	2.53625	-0.907923		0.44871	0.128963	-0.248115	2.31281
25.7	1.18361	1.64661	3.30771	1.37324		0.968572	0.945834	-0.52629	2.30312
25.8	0.674074	0.0715472	3.25788	1.20203			-2.17304	-0.737568	2.29019
25.9	1.2443	0.0738368	2.4467	2.89559		-1.19122	1.355	0.529153	2.56332
26	-0.179837	-1.74713	-1.16548	4.07441		-1.1291	1.79546	-0.184042	2.99624
26.1	-0.27539	-1.31886	-2.28852	1.34692		-0.546668	1.28097	-0.101231	2.42843
26.2	-0.360687	-0.634672	-1.48909	-0.0300886		1.02628		0.0401994	3.33031
26.3	0.543268	-1.09356	-0.407122	-0.349262		1.53946	-0.491289	-0.912495	2.69893
26.4	1.46234	-0.09512	0.50764	-1.57261		0.164099	0.791388	-0.286882	2.06339
26.5	2.35801	0.737051	2.25376	-0.873174		-0.693985	-1.90329	-0.57166	1.56331
26.6	-0.171159	-0.610532	1.38779	1.0086		-0.560185	0.663187	-1.70722	1.77613
26.7	-1.44602	-0.849509	1.43471	0.340429		1.24225	-1.29549	-0.028921	2.15282
26.8	-1.19399	-0.807847	2.42361	1.03912		0.149064	0.116177	0.0949803	2.32569
26.9	-0.814061	-0.531821	2.28985	0.626625		0.846466		-0.389499	2.81693
27	0.214349	0.464553	3.6081	-0.222258		-0.146482	-0.287155	0.850084	2.03554
27.1	1.49678	1.66185	3.11672	0.790362		0.44871	-0.972909	0.441095	2.62677
27.2	0.885915	0.00291613	2.2412	1.174		0.968572	-1.01856	-0.892966	2.47783
27.3	-0.757522	-1.8692	0.950716	0.0229562			0.396356	-0.0395219	2.51114
27.4	-0.589815	-2.55729	0.223874	0.145789		-1.19122	-0.622405	-0.37925	2.36862
27.5	-1.60693	-2.31875	1.43134	0.976788		-1.1291	1.094	0.330133	2.16208
27.6	-1.23403	-0.18097	2.05877	-0.673006		-0.546668	0.602284	0.80975	2.20074
27.7	0.092322	1.28708	0.471852	0.535037		1.02628	-0.354116	0.18617	2.00724
27.8	2.08432	0.313433	2.11561	0.645908		1.53946	1.35489	0.0172502	2.90693
27.9	2.21781	0.988344	2.08522	-1.23635		0.164099	-0.192379	-0.261863	2.86849
28	2.86079	0.458475	3.29398	-0.257494		-0.693985	-0.613208	-1.55714	2.96902
28.1	1.62885	-0.1268	6.19299	-0.918373		-0.560185	2.09392	-0.421372	2.43449
28.2	1.17142	0.268184	5.55015	-2.01826		1.24225	1.18945	-0.922427	2.29298
28.3	0.389884	-0.945922	2.78426	-1.8302		0.149064	1.55128	-2.28297	1.9161
28.4	0.48818	-2.15493	1.10594	-1.28109		0.846466	0.616977	-0.366422	2.19214
28.5	-0.111385	-0.682095	-1.30988	-1.30364		-0.146482	0.21185	-0.0718575	2.83741
28.6	-0.335954	-0.438621	-0.803407	-0.00407053		0.44871	-0.0141548	-1.26582	2.09202
28.7	-1.18463	0.994264	0.0576731	-2.10298		0.968572	2.281	-0.272729	3.12977
28.8	-1.06104	1.49572	1.089	-0.832369			-0.237804	-0.508939	2.50286
28.9	-0.218299	0.272328	1.56028	0.0461884		0.164099	0.116177	-1.6271	1.76791
29	0.826464	-0.508292	0.937611	1.65094		-0.693985	1.00438	0.409536	1.60982
29.1	1.46283	-0.0694416	0.0929183	3.3049		-0.560185	0.902652	0.0761003	1.69257
29.2	1.99581	0.445943	1.51133	1.78499		1.24225	-0.550959	0.354445	1.74368
29.3	0.397195	0.142398	2.61276	-0.575241		0.149064	1.80039	0.746145	2.25213
29.4	-1.35232	0.789733	1.38339	-1.38419		0.846466	2.70206	-0.0639667	2.57973
29.5	-1.63104	-0.608482	1.08516	-1.98952		-0.146482	1.86758	0.132703	1.63679
29.6	-2.10374	-0.864124	0.00206479	-1.83881		0.44871	-0.337067	0.85474	2.58366
29.7	-0.889245	0.858437	-1.28809	-1.38132		0.968572	1.22108	-0.939121	2.07107
29.8	2.09344	2.41023	-1.50371	-2.7183			0.693134	0.240356	1.80503
29.9	2.44805	2.62191	1.20101	-2.43971		-1.19122	1.43351	-0.154367	1.66973
30	2.66143	2.01204	0.578538	-1.59505		-1.1291	0.39658	-1.60494	1.86118
30.1	2.84564	0.157684	2.32551	-1.13736		-0.546668	0.558092	0.278112	1.85675
30.2	1.82567	1.47267	2.47676	-0.203319		1.02628	2.57834	0.382976	1.97941
30.3	1.18214	1.65511	1.58799	1.5045		1.53946	1.142	-1.2663	2.32662
30.4	1.48349	0.831169	0.256731	1.85128		0.164099	-1.16235	0.0931005	1.7054
30.5	0.0361904	-0.625866	1.65544	1.0219		-0.693985	1.42286	-0.17302	1.62223
30.6	0.96734	-2.09578	2.42817	0.134867		-0.560185	1.78222	-1.36331	1.39693
30.7	1.78055	-2.80189	3.16881	-3.03155		1.24225	0.128963	0.412618	1.20173
30.8	3.07439	-0.359688	2.8772	-3.45391			0.945834	-0.0493172	1.20575
30.9	2.76424	0.29199	1.40904	-1.04001			-2.17304	-0.798319	1.58158
31	3.15233	1.12256	0.920802	0.811689		-0.693985	1.355	0.356895	2.3973
31.1	1.3095	2.00298	1.50328	2.37763		-0.560185		-0.215122	1.71994
31.2	0.258067	3.55721	2.30154	2.74564		1.24225	1.00438	0.0483753	2.26034
31.3	-1.1164	3.27869	4.6217	1.36187		0.149064	0.902652	0.580257	1.68059
31.4	-0.512712	2.50866	5.80543	1.69249		0.846466	-0.550959	-0.493087	1.50808
31.5	-0.0487243	0.218846	4.58186	1.1253		-0.146482	1.80039	0.0292061	1.37016
31.6	1.27857	-1.3579	1.15399	-1.18109		0.44871	2.70206	-0.260331	1.52522
31.7	0.767199	-1.42222	0.210253	-0.910379		0.968572	1.86758	-1.25518	0.985899
31.8	0.331087	-0.249984	-1.90726	-1.01779			-0.337067	0.132426	0.762597
31.9	-1.0881	0.76714	0.232773	-0.575341		-1.19122	1.22108	-0.570598	1.22696
32	0.269997	0.904583	1.30376	1.38931		-1.1291	0.693134	0.0571501	0.868071
32.1	-0.667555	-0.961088	2.17423	0.291059		-0.546668	1.43351	1.15973	1.96031
32.2	0.561709	-2.08311	1.65611	-0.0485243		1.02628	0.39658	-0.236807	1.55919
32.3	0.720815	-1.59278	1.7279	-0.0720917		1.53946	0.558092	-0.791081	0.982751
32.4	1.05443	-0.996462	-0.0585766	-0.696157		0.164099	2.57834	-0.508939	0.639123
32.5	-0.190008	-0.235107	0.960633	-1.86529		-0.693985	1.142	-1.6271	0.797514
32.6	0.204415	1.05354	0.150656	-1.50264		-0.560185	-1.16235	0.409536	1.24263
32.7	-2.27262	-0.784038	0.028614	-0.69385		1.24225	1.42286	0.0761003	1.52103
32.8	-1.96095	-1.23747	0.324454	1.30169		0.149064	1.78222	0.354445	2.08058
32.9	-2.92377	-0.4975	-0.129664	0.531971		0.846466	0.128963	0.746145	1.37212
33	-2.62135	-0.0344324	-0.751747	-0.72138		-0.146482	0.945834	-0.0639667	1.07862
33.1	-0.834396	0.317392	-0.237855	0.241925		0.44871	-2.17304	0.132703	0.850845
33.2	1.11766	1.02011	0.42532	-0.22199		0.968572	1.355	0.85474	0.893635
33.3	1.67104	-0.987336	0.556886	2.40365			1.79546	-0.939121	0.742121
33.4	2.35278	-1.66728	0.481769	3.41416		-1.19122	1.28097	0.240356	1.07736
33.5	1.04552	-1.702	0.452154	3.64985		-1.1291		-0.154367	1.41928
33.6	-0.228887	-1.18079	1.12772	2.66907		-0.546668	-0.491289	-1.60494	0.813787
33.7	-0.414619	0.187589	1.49175	1.98842		1.02628	0.791388	0.278112	1.70376
33.8	-1.42567	1.33608	3.10249	0.283966		1.53946	-1.90329	0.382976	1.16798
33.9	-1.51177	2.08021	2.72227	1.40325		0.164099	0.663187	-1.2663	0.495761
34	-0.283006	0.627291	1.37856	2.01891		-0.693985	-1.29549	0.0931005	0.366775
34.1	0.155187	0.63071	0.433053	3.75193		-0.560185	0.116177	-0.17302	0.524128
34.2	1.83814	0.184464	0.7829	3.32414		1.24225		-1.36331	0.805461
34.3	0.802461	1.91448	0.437774	1.30968		0.149064	-0.287155	0.412618	1.09886
34.4	-0.626401	0.848482	0.935019	1.01017		0.846466	-0.972909	-0.0493172	1.56275
34.5	-1.11893	-0.0793205	1.52859	1.73281		-0.146482	-1.01856	-0.798319	0.817344
34.6	-1.98679	-2.33131	1.19085	0.89632		0.44871	0.396356	0.356895	1.54319
34.7	-0.64615	-2.21276	-0.00348383	0.0353562			-0.622405	-0.215122	1.19573
34.8	0.707205	-2.63402	0.54648	-0.574207			1.094	0.0483753	0.697671
34.9	-0.0434856	0.41982	1.03059	-0.506172		1.54341	0.602284	0.580257	0.296246
35	-0.0912708	0.591242	1.37206	1.1967		0.504295	-0.354116	-0.493087	0.234512
35.1	-0.433299	1.97085	1.88033	4.43595			1.35489	0.0292061	0.673161
35.2	-2.38242	2.36988	2.4774	3.37209		-0.132509	-0.192379	-0.260331	0.849136
35.3	-0.962502	1.64661	0.909691	3.50461			-0.613208	-1.25518	1.33132
35.4	-0.993272	0.0715472	1.46373	2.71843		-0.739851	2.09392	-0.472592	0.489604
35.5	-0.423526	0.0738368	2.71136	1.80646		-0.821103	1.18945	0.898378	0.273326
35.6	0.660778	-1.74713	3.85697	1.53039		-0.796651	1.55128	0.915949	-0.0998303
35.7	0.32038	-1.31886	3.12541	1.78488			0.616977	1.15829	0.141655
35.8	-0.347025	-0.634672	3.71052	1.10694		0.314757	0.21185	1.16363	0.330002
35.9	-0.249587	-1.09356	2.63788	2.67832		-3.26626	-0.0141548	0.367885	0.588488
36	-0.49399	-0.09512	1.77757	2.14862		0.557451	2.281	-0.939121	0.94135
36.1	-0.649317	0.737051	2.1563	2.36576		1.54341	-0.237804	0.240356	0.222615
36.2	-1.60353	-0.610532	2.82809	0.116479		0.504295	0.116177	-0.154367	1.1783
36.3	-2.3638	-0.849509	2.25284	-1.92993			1.00438	-1.60494	0.752708
36.4	-1.34054	-0.807847	2.1024	-1.40374		-0.132509		0.278112	0.507871
36.5	-0.589968	-0.531821	1.04894	-0.565093			-0.287155	0.382976	0.43394
36.6	-0.393045	0.464553	1.73128	1.19014		-1.19122	-0.972909	-1.2663	0.343884
36.7	-0.964192	1.66185	2.47302	1.55928		-1.1291	-1.01856	0.0931005	0.164468
36.8	-1.29697	0.00291613	1.88484	0.57033		-0.546668	0.396356	-0.17302	0.386686
36.9	-0.538582	-1.8692	2.28473	-0.345123		1.02628	-0.622405	-1.36331	0.899285
37	0.484351	-2.55729	2.72015	0.585137		1.53946	1.094	0.412618	0.353461
37.1	1.20874	-2.31875	2.73547	1.28925		0.164099	0.602284	-0.0493172	1.51337
37.2	0.815053	-0.18097	3.20796	1.69528		-0.693985	-0.354116	-0.798319	0.939004
37.3	-0.531476	1.28708	2.11097	-0.0856378		-0.560185	1.35489	0.356895	0.580239
37.4	-1.2557	0.313433	0.70351	0.903718		1.24225	-0.192379	-0.215122	0.230872
37.5	-1.32101	0.988344	0.513134	0.938461		0.149064	-0.613208	0.0483753	0.378901
37.6	-1.6756	0.458475	1.58305	1.63375		0.846466	2.09392	0.580257	0.572371
37.7	-0.236562	-0.1268	2.93844	2.5764		-0.146482	1.18945	-0.493087	0.936218
37.8	0.816946	0.268184	3.40767	0.876585		0.44871	1.55128	0.0292061	1.45886
37.9	1.05766	-0.945922	1.81001	0.17663		0.968572	0.616977	-0.260331	0.925596
38	0.517974	-2.15493	0.361802	0.963286			0.21185	-1.25518	0.696893
38.1	0.000546796	-0.682095	-0.430076	0.639394		-1.19122	-0.0141548	0.132426	0.377875
38.2	-1.63795	-0.438621	-0.0057494	0.03265		-1.1291	2.281	-0.570598	0.304335
38.3	-0.297355	0.994264	2.14629	-0.285119		-0.546668	-0.237804	0.0571501	0.430416
38.4	-0.0341204	1.49572	2.12466	-1.94043		1.02628	0.116177	1.15973	1.02379
38.5	0.364608	0.272328	2.2751	0.0689864		1.53946	1.00438	-0.236807	1.2223
38.6	-0.147479	-0.508292	1.50763	1.20681		0.164099	0.902652	-0.791081	0.141885
38.7	-0.882886	-0.0694416	2.39796	1.7645		-0.693985	-0.550959	-0.508939	0.804394
38.8	-2.60173	0.445943	2.96581	2.53462		-0.560185	1.80039	-1.6271	0.399138
38.9	-2.54062	0.142398	3.80819	1.71137		1.24225	2.70206	0.409536	0.178366
39	-2.33753	0.789733	2.23269	-0.215484		0.149064	1.86758	0.0761003	0.314838
39.1	-1.56699	-0.608482	3.17009	0.147268		0.846466	-0.337067	0.354445	0.361952
39.2	-1.48596	-0.864124	2.28133	-1.45571		-0.146482	1.22108	0.746145	0.261929
39.3	-0.695345	0.858437	2.28346	-1.48131		0.44871	0.693134	-0.0639667	0.77023
39.4	-0.988577	2.41023	1.29183	-1.88061		0.968572	1.43351	0.132703	1.23746
39.5	-1.31366	2.62191	0.50395	-0.479272			0.39658	0.85474	0.125775
39.6	-0.18724	2.01204	-0.575263	-0.886336		-1.19122	0.558092	-0.939121	0.729939
39.7	0.225073	0.157684	0.0854297	0.205184		-1.1291	2.57834	0.240356	0.00281334
39.8	0.556887	1.47267	0.358669	0.641819		-0.546668	1.142	-0.605504	-0.140981
39.9	0.624387	1.65511	0.85491	0.00450705		1.02628	-1.16235	-0.396799	-0.191799
40	-0.924507	0.831169	1.22413	-1.35593			1.42286	0.75204	0.0456948
40.1	-1.78066	-0.625866	1.2487	-0.792026		-1.19122	1.78222	0.0431409	0.347734
40.2	-1.27482	-2.09578	0.336176	-0.757171		-1.1291	0.128963	-0.320899	0.616503
40.3	-0.548228	-2.80189	0.247995	2.33764		-0.546668	0.945834	-0.0627769	0.899875
40.4	0.217262	-0.359688	0.388067	3.69275		1.02628	-2.17304	-1.60494	0.397685
40.5	-0.225941	0.29199	1.03788	1.78409		1.53946	1.355	0.278112	0.0328465
40.6	-2.13252	1.12256	1.97116	0.736621		0.164099	1.79546	0.382976	-0.270782
40.7	-2.31473	2.00298	1.80541	-1.59911		-0.693985	1.28097	-1.2663	-0.374503
40.8	-1.97353	3.55721	1.20776	-2.14937		-0.560185	0.137039	0.0931005	-0.281773
40.9	-2.29809	3.27869	0.173041	0.19747		1.24225	1.88474	-0.17302	-0.034803
41	-1.22743	2.50866	0.299004	2.24182		0.149064	0.176295	-1.36331	0.726025
41.1	-0.884652	0.218846	0.931411	3.27354		0.846466	0.116177	0.412618	0.207132
41.2	-0.238745	-1.3579	2.40704	3.23683		-0.146482	0.652644	-0.0493172	1.09981
41.3	-0.506658	-1.42222	3.84416	0.760487		0.44871	1.51146	-0.798319	0.39475
41.4	-1.16545	-0.249984	3.66722	-0.359542		0.968572	1.56575	0.356895	0.289958
41.5	-1.96192	0.76714	2.52745	-0.354476		-0.242162		-0.215122	-0.0794334
41.6	-0.826695	0.904583	2.11309	0.958252		1.65215	-0.287155	0.0483753	-0.0461334
41.7	0.0278017	-0.961088	0.966534	2.64396		0.484856	-0.972909	0.580257	-0.235615
41.8	1.28656	-2.08311	-0.0721157	2.1205		2.05067	-1.01856	-0.493087	-0.281308
41.9	1.12145	-1.59278	0.667193	0.615226		-1.41766	0.396356	0.0292061	0.188301
42	-0.353996	-0.996462	0.015102	1.20191		-1.17679	-0.622405	-0.260331	-0.163896
42.1	-0.334468	-0.235107	0.724986	0.111481		2.8275	1.094	-1.25518	0.898119
42.2	-0.82616	1.05354	1.94795	-1.5341		-0.70249	0.602284	0.143316	0.635916
42.3	-1.8164	-0.784038	1.41517	-1.26959		1.9313	-0.354116	-0.174276	0.0605552
42.4	-0.600309	-1.23747	0.429553	-1.18326		0.683506	1.35489	-1.12661	-0.351879
42.5	0.636877	-0.4975	0.907385	-0.260542		-0.749267	-0.192379	0.49046	-0.244246
42.6	1.3933	-0.0344324	0.454216	1.42353		1.85809	-0.613208	0.515152	-0.137192
42.7	1.18869e-05	0.317392	0.341304	1.19666		0.314757	2.09392	-0.269006	0.0782523
42.8	-1.31449	1.02011	2.04276	1.47752		1.12682	1.18945	0.508418	0.799458
42.9	-2.99933	-0.987336	1.68661	1.38425		0.441116	1.55128	-0.842635	0.17163
43	-1.73453	-1.66728	0.794567	2.03894		0.18035	0.616977	-1.14401	0.514314
43.1	-1.22058	-1.702	0.381718	0.788966		0.184754	0.21185	-0.254055	0.0850629
43.2	-0.355771	-1.18079	-0.75385	-0.816952			-0.0141548	-0.700201	-0.068387
43.3	-1.92327	0.187589	-0.213911	-0.232029		-1.1291	2.281	-0.664077	-0.36481
43.4	-2.12242	1.33608	2.17956	2.13542		-0.546668	-0.237804	-0.275261	0.00133653
43.5	-1.73419	2.08021	3.5181	2.61987		1.02628	0.116177	-1.48251	0.446171
43.6	-0.945946	0.627291	2.50141	4.00974			1.00438	-0.38643	0.220383
43.7	-0.926893	0.63071	2.00976	2.02782		-1.19122	0.902652	-0.608007	0.857669
43.8	-0.357605	0.184464	-1.13166	-1.30924		-1.1291	-0.550959	-1.93281	0.311263
43.9	-0.65234	1.91448	-0.91362	-1.33237		-0.546668	1.80039	-0.999876	0.105844
44	-0.503864	0.848482	-0.722864	-1.14335		1.02628	2.70206	-0.915883	-0.320715
44.1	-0.86852	-0.0793205	0.413327	-1.00302		1.53946	1.86758	-1.79067	-0.33787
44.2	-1.86851	-2.33131	0.653749	-1.01711		0.164099	-0.337067	-0.727988	-0.078406
44.3	-3.46317	-2.21276	2.48818	-1.89521		-0.693985	1.22108	0.195581	0.1939
44.4	-2.31647	-2.63402	1.4901	-2.98947		-0.560185	0.693134	0.356941	0.779118
44.5	-1.30763	0.41982	2.43218	-1.16615		1.24225	1.43351	0.36995	-0.0499556
44.6	1.00797	0.591242	0.839472	-0.843918		0.149064	0.39658	0.257059	0.348
44.7	1.87478	1.97085	0.653342	1.10197		0.846466	0.558092	-1.24365	-0.166861
44.8	1.64574	2.36988	1.30244	1.07898		-0.146482	2.57834	-0.572639	-0.116831
44.9	0.119611	1.64661	2.10271	0.717609		0.44871	1.142	0.430808	-0.23438
45	1.17467	0.0715472	0.570859	0.506312		0.968572	-1.16235	-0.216254	-0.0314484
45.1	1.73753	0.0738368	-1.99446	1.43348		-0.242162	1.42286	-0.192995	-0.298715
45.2	1.88073	-1.74713	-3.77718	1.3923		1.65215	1.78222	-0.199316	-0.183875
45.3	1.24232	-1.31886	-3.45829	0.796819		0.484856	0.128963	-1.46941	0.267238
45.4	1.10077	-0.634672	-3.25568	-0.046384		2.05067	0.945834	0.383559	-0.248742
45.5	-0.126439	-1.09356	-0.22627	-0.531813		-1.41766	-2.17304	0.831402	-0.41041
45.6	0.319964	-0.09512	1.1625	0.532914		-1.17679	1.355	-0.422384	-0.782398
45.7	0.27594	0.737051	1.25685	1.34583		2.8275	1.79546	1.06646	-0.944766
45.8	0.343577	-0.610532	4.34258	1.76104		-0.70249	1.28097	0.336879	-0.839343
45.9	-0.381531	-0.849509	3.93325	-0.182715		1.9313	0.137039	-1.13584	-0.498359
46	-0.266713	-0.807847	1.70671	-1.25105		0.683506	1.88474	0.019795	0.238624
46.1	-1.53868	-0.531821	-0.0282559	-2.66534		-0.749267	0.176295	-0.0485488	-0.401702
46.2	-0.269099	0.464553	-1.65273	-1.34596		1.85809	0.116177	-1.59974	0.24553
46.3	-0.263189	1.66185	-2.20817	-1.51321		0.314757	0.652644	-0.403554	-0.138649
46.4	1.55124	0.00291613	-1.515	-1.45933		1.12682	1.51146	-0.721779	-0.485933
46.5	1.84538	-1.8692	-1.17405	-1.38264		0.441116	1.56575	-0.00781432	-0.818798
46.6	1.51839	-2.55729	0.632925	-0.524526				0.960306	-0.229148
46.7	0.707459	-2.31875	2.02933	-0.548257		-1.17679	1.43351	0.173082	-0.397851
46.8	1.01822	-0.18097	3.0531	0.376831		2.8275	0.39658	-0.328038	-0.516667
46.9	-0.134615	1.28708	5.65168	2.56759		-0.70249	0.558092	0.0195678	0.507454
47	-0.0352921	0.313433	3.62831	1.48476		1.9313	2.57834	-0.850972	-0.0519055
47.1	0.639466	0.988344	1.54489	1.18285		0.683506	1.142	0.686923	0.748199
47.2	0.502861	0.458475	-1.57685	0.812503		-0.749267	-1.16235	0.211594	0.265288
47.3	0.0372178	-0.1268	-2.96815	-0.906661		1.85809	1.42286	0.132695	-0.365822
47.4	0.696583	0.268184	-3.35873	-1.10119		0.314757	1.78222	0.345109	-1.04998
47.5	-0.186561	-0.945922	0.354965	-0.00645485		1.12682	0.128963	-0.410871	-0.772985
47.6	-0.929262	-2.15493	0.606918	-0.789681		0.441116	0.945834	-0.248722	-0.504725
47.7	0.123406	-0.682095	0.330573	1.17995		0.18035	-2.17304	0.655955	-0.322975
47.8	0.163439	-0.438621	-0.89871	1.3287		0.184754	1.355	-0.269006	-0.0399092
47.9	1.05829	0.994264	-1.02237	0.356968			1.79546	0.508418	-0.591396
48	3.44556	1.49572	-0.643773	0.189707		-1.1291	1.28097	-0.842635	-0.890012
48.1	1.92812	0.272328	-1.33191	-1.17079		-0.546668	0.137039	-1.14401	-1.0871
48.2	2.36084	-0.508292	0.138691	-1.42587		1.02628	1.88474	-0.254055	-0.763387
48.3	1.82395	-0.0694416	1.96261	-0.33301			0.176295	-0.700201	-0.634328
48.4	0.98934	0.445943	4.10401	-1.07789		-1.19122	0.116177	-0.664077	-0.16173
48.5	0.0749162	0.142398	6.74269	-1.11727		-1.1291	0.652644	-0.275261	0.30737
48.6	-0.318573	0.789733	5.6059	-0.584951		-0.546668	1.51146	-1.48251	-0.717066
48.7	-1.89745	-0.608482	2.0208	-0.70526		1.02628	1.56575	-0.38643	0.366342
48.8	-0.224073	-0.864124	-0.391738	0.0722574		1.53946		-0.608007	-0.154713
48.9	0.413132	0.858437	-1.20623	0.24956		0.164099	-0.287155	-1.93281	-0.435847
49	1.98944	2.41023	-1.60983	-0.317219		-0.693985	-0.972909	-0.999876	-0.307907
49.1	3.17877	2.62191	0.0676036	0.326774		-0.560185	-1.01856	-0.915883	-0.266455
49.2	3.10632	2.01204	0.410316	0.641499		1.24225	0.396356	-1.79067	-0.381069
49.3	2.42596	0.157684	1.21516	0.103878		0.149064	-0.622405	-0.727988	0.114123
49.4	1.20329	1.47267	-0.0732824	1.0407		0.846466	1.094	0.195581	0.362445
49.5	-0.867034	1.65511	0.298814	-0.688172		-0.146482	0.602284	0.356941	-0.620889
49.6	-1.20732	0.831169	-0.166144	0.0650564		0.44871	-0.354116	0.36995	0.0880284
49.7	0.0968305	-0.625866	-0.556731	0.217761		0.968572	1.35489	0.257059	-0.457493
49.8	1.06716	-2.09578	0.568526	-0.0226859		-0.242162	-0.192379	-1.24365	-0.675317
49.9	1.29948	-2.80189	1.4637	0.265892		1.65215	-0.613208	-0.572639	-0.860378
50	-0.583124	-0.359688	1.25845	0.117446		0.484856	2.09392	0.430808	-0.675802
50.1	-2.65631	0.29199	2.05918	-1.43522		2.05067	1.18945	-0.216254	-0.502524
50.2	-1.85372	1.12256	1.88037	0.127316			1.55128	-0.192995	-0.318077
50.3	0.880643	2.00298	0.854965	0.121485		-0.546668	0.616977	-0.199316	0.24054
50.4	3.11073	3.55721	2.37766	0.892895		1.02628	0.21185	-1.46941	-0.0708703
50.5	3.97329	3.27869	3.78434	3.28793		1.53946	-0.0141548	0.383559	-0.0727234
50.6	2.37571	2.50866	4.34392	3.78828		0.164099	2.281	0.831402	-0.145867
50.7	0.698595	0.218846	4.0369	2.90832		-0.693985	-0.237804	-0.422384	-0.134646
50.8	0.165579	-1.3579	2.53367	1.96187		-0.560185	0.116177	1.06646	-0.380928
50.9	-0.396823	-1.42222	0.648119	0.204767		1.24225	1.00438	0.336879	-0.454307
51	-1.07387	-0.249984	-0.123057	-0.783579		0.149064		-1.13584	0.0773792
51.1	-0.531315	0.76714	1.07169	-0.227814		0.846466	1.355	0.019795	-0.515824
51.2	-0.764866	0.904583	2.29337	-1.06216		-0.146482	1.79546	-0.0485488	0.545403
51.3	0.0366404	-0.961088	1.2283	-1.85027		0.44871	1.28097	-1.59974	0.00242154
51.4	0.270549	-2.08311	0.994833	-2.69049		0.968572	0.137039	-0.403554	-0.540978
51.5	-0.655346	-1.59278	0.598684	-3.02657		-0.242162	1.88474	-0.313343	-0.713241
51.6	0.151671	-0.996462	1.21027	-2.14284		1.65215	0.176295	-1.10483	-0.561511
51.7	0.157946	-0.235107	1.41643	-1.76389		0.484856	0.116177	0.510703	-0.441098
51.8	0.321942	1.05354	2.55098	-1.35642		2.05067	0.652644	0.52463	-0.198851
51.9	0.878596	-0.784038	3.26971	-0.480518		-1.41766	1.51146	-0.87212	0.0661894
52	0.362528	-1.23747	2.65711	-1.27593		-1.17679	1.56575	-0.0541219	-0.618767
52.1	-1.24241	-0.4975	2.40322	-0.103334		2.8275		-0.0485488	0.189879
52.2	-1.20488	-0.0344324	2.13926	1.85142		-0.70249	-0.287155	-1.59974	-0.171769
52.3	-1.64885	0.317392	0.94556	0.765155		1.9313	-0.972909	-0.403554	-0.403044
52.4	-0.335801	1.02011	-0.30764	-0.0588522		0.683506	-1.01856	-0.721779	-0.838596
52.5	0.536501	-0.987336	1.28938	0.459521		-0.749267	0.396356	-0.00781432	-1.07849
52.6	-0.0545149	-1.66728	2.9383	-1.01402		1.85809	-0.622405	0.960306	-0.869528
52.7	-0.867543	-1.702	4.15357	-1.37535		0.314757	1.094	0.173082	-1.07835
52.8	-1.3386	-1.18079	5.53088	-0.152676		1.12682	0.602284	-0.328038	-0.327466
52.9	-0.942864	0.187589	6.36188	0.233949		0.441116	-0.354116	0.0195678	-0.735155
53	-0.238711	1.33608	3.75692	-0.751228		0.18035	1.35489	-0.850972	-0.891885
53.1	-0.406044	2.08021	3.15181	0.149115		0.184754	-0.192379	0.686923	-0.863139
53.2	-2.13507	0.627291	2.35925	-0.432774			-0.613208	0.211594	-0.745236
53.3	-2.62219	0.63071	1.55988	0.037485		-1.1291	2.09392	0.132695	-0.617085
53.4	-2.31957	0.184464	1.56568	1.19844		-0.546668	1.18945	0.345109	-0.128417
53.5	-0.991804	1.91448	1.81508	1.19837		1.02628	1.55128	-0.410871	0.217673
53.6	0.295155	0.848482	3.99585	0.492226			0.616977	-0.248722	-0.614183
53.7	1.42352	-0.0793205	4.15589	-0.295276		-1.19122	0.21185	0.655955	0.321255
53.8	1.24505	-2.33131	2.99969	0.174672		-1.1291	-0.0141548	-0.269006	-0.466428
53.9	0.970541	-2.21276	1.63511	1.69555		-0.546668	2.281	0.508418	-0.871928
54	0.826804	-2.63402	1.28407	1.99397		1.02628	-0.237804	-0.842635	-1.11181
54.1	0.0215781	0.41982	0.884458	2.36536		1.53946	0.116177	-1.14401	-1.16643
54.2	-0.229277	0.591242	1.91873	3.89548		0.164099	1.00438	-0.254055	-0.913187
54.3	-0.239025	1.97085	2.00326	5.18329		-0.693985	0.902652	-0.700201	-0.639882
54.4	-0.199178	2.36988	2.55975	5.66802		-0.560185	-0.550959	-0.664077	-0.0794855
54.5	-0.271773	1.64661	1.28477	3.75339		1.24225	1.80039	-0.275261	-0.268246
54.6	0.85467	0.0715472	2.00406	1.7056		0.149064	2.70206	-1.48251	-0.0628332
54.7	0.980535	0.0738368	0.662784	-0.033106		0.846466	1.86758	-0.38643	-0.268282
54.8	-0.753183	-1.74713	-1.91944	0.0535632		-0.146482	-0.337067	-0.608007	-0.488536
54.9	-2.4202	-1.31886	-0.448133	1.68736		0.44871	1.22108	-1.93281	-0.828364
55	-2.49083	-0.634672	1.30552	3.15895		0.968572	0.693134	-0.999876	-0.668033
55.1	-2.2151	-1.09356	2.85774	4.54286		-0.242162	1.43351	-1.3327	0.142596
55.2	-0.229345	-0.09512	2.96041	4.1514			0.39658	-0.787375	-0.526863
55.3	0.883725	0.737051	2.53427	3.4295		-0.693985	0.558092	0.33288	0.111213
55.4	-0.0735169	-0.610532	1.86914	2.2138		-0.560185	2.57834	-0.573275	-0.686528
55.5	-1.84872	-0.849509	2.86827	0.17949		1.24225	1.142	0.0186135	-0.927927
55.6	-2.36319	-0.807847	2.97933	-1.03496		0.149064	-1.16235	0.35509	-1.20866
55.7	-1.99902	-0.531821	3.62062	-0.807616		0.846466	1.42286	-1.2663	-0.769226
55.8	-1.14272	0.464553	2.63745	-0.714674		-0.146482	1.78222	0.0931005	-0.718289
55.9	-0.337779	1.66185	1.39687	1.12545		0.44871	0.128963	-0.17302	-0.634361
56	-0.789854	0.00291613	0.800387	0.740282		0.968572	0.945834	-1.36331	-0.08362
56.1	-3.12929	-1.8692	2.38756	1.80224			-2.17304	0.412618	-0.859494
56.2	-3.13491	-2.55729	2.78702	2.08115		0.164099	1.355	-0.0493172	-0.0212166
56.3	-2.36587	-2.31875	5.97341	1.26485		-0.693985	1.79546	-0.798319	-0.482975
56.4	-2.12916	-0.18097	7.40464	1.27157		-0.560185	1.28097	0.356895	-0.54792
56.5	-1.16916	1.28708	5.68256	1.40568		1.24225	0.137039	-0.215122	-0.762401
56.6	0.00418078	0.313433	4.19203	0.87645		0.149064	1.88474	0.0483753	-0.354009
56.7	-0.188616	0.988344	5.58065	2.57896		0.846466	0.176295	0.580257	-0.304982
56.8	0.412334	0.458475	4.00821	2.8844		-0.146482	0.116177	-0.493087	0.0234047
56.9	0.0685907	-0.1268	4.34154	3.55602		0.44871	0.652644	0.0292061	0.25481
57	-1.92633	0.268184	3.85162	3.67317		0.968572	1.51146	-0.260331	-0.334204
57.1	-1.42285	-0.945922	1.13389	3.7119			1.56575	-1.25518	-0.457725
57.2	0.186831	-2.15493	0.707363	3.61613		-1.19122		0.143316	-0.640182
57.3	0.570047	-0.387368	1.58304	3.20001		-1.1291	1.43351	-0.174276	-0.443114
57.4	0.993857	-0.958018	1.06414	2.72166		-0.546668	0.39658	-1.12661	-0.213282
57.5	1.27178	0.197434	1.39129	2.82078		1.02628	0.558092	0.0540806	0.0109098
57.6	0.886476	0.78577	2.11886	1.24768		1.53946	2.57834	0.665333	0.294457
57.7	1.66442	-0.0922997	0.870349	0.239175		0.164099	1.142	1.53879	-0.456445
57.8	1.79738	-1.03978	-0.215512	1.01349		-0.693985	-1.16235		0.161503
57.9	2.02741	-0.807847	-0.522951	1.70623		-0.560185	1.42286		-0.347277
58	1.68239	-0.531821	0.465734	2.1744		1.24225	1.78222		-0.685365
58.1	2.04704	0.464553	0.502349	1.79315			0.128963		-0.915404
58.2	2.08497	1.66185	1.57346	0.637927			0.945834		-0.81063
58.3	0.162777	0.00291613	2.19937	-1.1619		-0.693985	-2.17304		-0.577257
58.4	-1.52729	-1.8692	1.12153	-0.93915		-0.560185	1.355		-0.165838
58.5	-1.57064	-2.55729	1.43962	-0.688085		1.24225	1.79546		0.353568
58.6	-1.55709	-2.31875	2.33233	0.367019		0.149064	1.28097		-0.384841
58.7	-0.357664	-0.18097	2.67513	0.886379		0.846466	0.137039		0.0964326
58.8	0.978658	1.28708	2.21202	0.525955		-0.146482	1.88474		-0.635323
58.9	0.272035	0.313433	1.80925	1.31628		0.44871	0.176295		-0.787435
59	-1.25478	0.988344	-0.705323	1.4958		0.968572	0.116177		-0.948874
59.1	-1.71843	0.458475	-1.68655	1.83357			0.652644		-0.896485
59.2	-0.955761	-0.1268	-1.82628	2.53141		-1.19122	1.51146		-0.669213
59.3	-0.891648	0.268184	0.036279	1.72918		-1.1291	1.56575		-0.352544
59.4	-0.982642	-0.747615	1.09567	-0.375945		-0.546668			-0.926679
59.5	-2.11928	-2.10063	3.55927	-0.861391		1.02628	-0.287155		-1.89973
59.6	-3.35793	-1.62924	2.95252	-1.7483		1.53946	-0.972909
59.7	-3.27904		4.78412	-0.977664		0.164099	-1.01856
59.8	-1.38281		4.53695	-0.853445		-0.693985	0.396356
59.9	-0.42052		3.87653			-0.560185	-0.622405
60	-0.408948		3.64078			1.24225	1.094
60.1	-1.27872		3.7177			-0.693985	0.602284
60.2						-0.560185	-0.354116

## Sheet: Fig 3b
Time (s)	P415_Ixo_GoA	P415_ACh_GoA	P415_Arec_GoA	P415_Pilo_GoA		P415_Ixo_endo	P415_ACh_endo	P415_Arec_endo	P415_Pilo_endo
0	-1.92908	0.468113	-1.2925	-0.869853		0.224014	-0.565027	1.51518	0.421759
0.1	-0.413827	0.61987	-0.478513	-0.470849		0.399094	0.0476373	0.916303	0.201188
0.2	0.62417	0.294084	-0.570934	-0.0408461		0.482117	0.710719	-0.023528	0.257731
0.3	1.29016	-0.0780397	0.956283	0.530253		0.623736	1.0434	-1.01924	0.0398517
0.4	1.46523	-0.0908384	1.02991	0.148194		0.464104	0.897479	-0.439137	-0.660289
0.5	1.21992	-0.0241574	0.589021	0.270393		0.283285	0.779662	0.698789	0.143754
0.6	0.681479	-0.0873451	0.584889	0.121156		-0.372455	-0.0409713	0.259783	-0.105307
0.7	-0.39311	-0.348873	-0.326359	0.143488		-0.461379	-0.448237	-0.558638	-0.273736
0.8	-1.8144	-0.112353	0.141744	0.15657		-0.345489	-0.972893	-0.184194	0.716437
0.9	-0.870575	-0.224059	0.211728	-0.249987		-0.162162	-0.597131	0.793028	0.271235
1	-1.76991	-0.485026	-0.337023	-0.400766		-0.352171	0.0628426	0.227648	0.257768
1.1	-0.294296	-0.712762	1.06212	-0.503079		-0.266643	0.91626	0.592163	0.0875943
1.2	0.642305	-0.121928	-0.617774	-0.854155		-0.619997	1.09294	1.45108	-0.110266
1.3	1.22935	0.179301	-0.443329	-0.637793		-0.651551	1.30889	1.43879	0.944436
1.4	1.50772	0.322719	-1.47811	-0.287837		-0.772091	0.75949	0.372732	1.0404
1.5	1.24107	0.471794	-2.54458	-0.32122		-0.716631	0.231192	0.184951	0.3332
1.6	0.659573	0.589954	-1.82983	-0.59206		-0.468512	-0.445745	0.668629	-0.109192
1.7	-0.351855	0.3675	-0.0662596	-1.15272		-0.426264	-0.832036	-0.366504	-0.774324
1.8	-1.82123	0.163707	1.14546	-1.261		-0.579842	-0.860954	-0.197734	-1.85548
1.9	-0.896795	0.0670583	2.06167	-1.40827		-0.298748	-0.332139	0.703356	-2.30169
2	-0.95967	0.213382	1.64641	-0.832639		-0.583972	-0.227959	0.769118	-2.2115
2.1	-0.964557	-0.0307748	1.03243	-0.615594		-0.388613	-0.240796	0.209025	-0.990111
2.2	-0.899279	0.12739	-0.306768	-0.172727		-0.293176	0.0852443	0.123753	-0.282704
2.3	-1.04744	0.131415	-2.03646	-0.107597		-0.174006	0.222433	0.538435	-0.244188
2.4	-0.933714	0.254535	-2.50998	0.0610706		0.0554007	0.0771661	-0.247617	0.815017
2.5	-0.717398	0.217221	-1.65793	0.251905		-0.0243507	0.0408655	-0.226819	1.71948
2.6	-0.087628	-0.0773156	-0.928682	0.338206		-0.0682526	0.142285	0.891387	0.404275
2.7	0.669468	-0.233926	-0.82062	-0.319786		-0.0639214	0.456678	1.04233	-0.0365914
2.8	0.808687	-0.20856	0.513326	-0.49877		-0.553567	0.373788	0.9427	-0.142528
2.9	1.26554	-0.345205	0.18551	-0.723255		-0.880478	-0.133213	1.42931	0.825057
3	2.26711	0.146722	0.721054	-0.848655		-1.00826	-0.321856	1.53246	0.423404
3.1	2.60653	0.138729	0.428551	-0.751475		-0.94927	-0.286746	-0.517912	0.33189
3.2	3.05947	0.192238	0.542159	-0.488856		-0.830007	-0.601996	-2.60163	-0.565201
3.3	2.54097	-0.0964871	1.02895	-0.898992		-0.358078	-0.384895	-4.24338	-1.62773
3.4	2.03924	-0.900726	0.739282	-0.899078		-0.311169	-0.110418	-6.73976	-3.98125
3.5	0.939282	-1.71367	0.127776	-1.6779		0.283957	-0.179778	-9.07703	-5.62772
3.6	-1.05241	-2.23423	0.651556	-2.04027		0.44637	-0.480701	-9.79879	-6.34762
3.7	-1.73556	-3.01636	0.373126	-2.23222		-0.606671	-0.736463	-9.28537	-6.92697
3.8	-3.37903	-3.70419	-0.793378	-2.63254		-2.8992	-1.4106	-9.88159	-8.21099
3.9	-4.5402	-4.32827	-0.860543	-2.85164		-5.85335	-1.96555	-9.65242	-8.26226
4	-4.93427	-4.46188	-1.3476	-3.13184		-9.20639	-2.54004	-9.08935	-9.72586
4.1	-4.6488	-4.47821	-1.95196	-4.04283		-11.9608	-3.57887	-9.21349	-9.27858
4.2	-3.27241	-4.44982	-2.3233	-3.54376		-14.0393	-4.53567	-9.68476	-9.0123
4.3	-2.87604	-4.1104	-3.38322	-3.58501		-14.5836	-5.90839	-9.72727	-8.76406
4.4	-3.64175	-4.064	-3.58198	-3.57787		-14.6457	-7.05303	-9.33394	-8.60244
4.5	-3.72336	-4.32784	-3.90407	-3.46306		-14.521	-7.74709	-9.78674	-9.05862
4.6	-5.29959	-4.69801	-4.50437	-3.61549		-14.4419	-9.04526	-9.79589	-9.05312
4.7	-6.58208	-4.961	-4.29832	-3.24634		-14.1734	-9.58262	-9.08164	-8.62753
4.8	-8.20237	-5.31593	-4.60696	-3.39775		-14.511	-9.65005	-9.56216	-8.97649
4.9	-6.96301	-5.28065	-5.1199	-3.27007		-14.5257	-10.1938	-9.41472	-8.74778
5	-5.95601	-5.52657	-6.56761	-3.20046		-14.5188	-9.8442	-9.48756	-8.29337
5.1	-6.37011	-5.69054	-8.28489	-3.74254		-14.7175	-9.67233	-9.20058	-8.51808
5.2	-7.96703	-5.82627	-7.78443	-4.28528		-14.9833	-9.73186	-9.68402	-9.22298
5.3	-7.87251	-5.60495	-7.53695	-4.4268		-14.9672	-9.2943	-9.59475	-8.80233
5.4	-7.66678	-5.33902	-7.81269	-4.60838		-14.8045	-10.0676	-9.13524	-7.80797
5.5	-8.25414	-5.61153	-7.61831	-3.83223		-14.9139	-10.3372	-9.82451	-7.31089
5.6	-8.89357	-5.41272	-6.81946	-3.87019		-14.885	-10.7881	-9.71972	-6.77224
5.7	-7.37155	-5.15848	-6.31391	-3.14308		-14.9098	-11.022	-9.51634	-6.71538
5.8	-7.5306	-5.23928	-7.00035	-3.09472		-15.0831	-11.4722	-9.99994	-7.29183
5.9	-7.1328	-5.08388	-7.2251	-3.1551		-15.2295	-11.3894	-10.5841	-8.34386
6	-7.34176	-4.75356	-6.42933	-3.21957		-15.2282	-11.3201	-10.6287	-9.56573
6.1	-6.71021	-4.66636	-6.10846	-3.89386		-15.5691	-11.0463	-10.0804	-8.82954
6.2	-5.90232	-4.98076	-5.8895	-4.02926		-15.56	-11.7902	-10.358	-7.97564
6.3	-5.3316	-5.41435	-5.7005	-4.10107		-15.4871	-11.8764	-9.97617	-7.55353
6.4	-4.27991	-5.2924	-5.96387	-4.57404		-15.3562	-12.3497	-9.0887	-7.28943
6.5	-4.33239	-5.60028	-6.21363	-4.0398		-15.2842	-12.2548	-9.2483	-6.68925
6.6	-5.34638	-5.59992	-6.89584	-3.72254		-15.4901	-12.3502	-9.9225	-7.76165
6.7	-6.25338	-5.66257	-8.03333	-3.42212		-15.4217	-11.6116	-9.92209	-8.1219
6.8	-6.29753	-5.36376	-8.587	-3.39891		-15.427	-11.3141	-9.6244	-8.58651
6.9	-6.8418	-5.20276	-8.3942	-3.9424		-15.729	-11.2073	-10.3696	-8.84881
7	-6.42024	-4.94694	-7.38057	-3.41994		-15.503	-11.3192	-10.0867	-9.45863
7.1	-7.13257	-4.98169	-7.72196	-3.79557		-15.2787	-11.5422	-9.50386	-10.5487
7.2	-6.24177	-4.60368	-7.97098	-3.7719		-15.18	-11.9565	-9.63676	-10.8849
7.3	-6.61368	-4.7781	-8.05763	-3.38596		-14.9081	-12.1328	-10.3487	-10.4752
7.4	-7.68173	-5.04787	-8.03334	-3.60056		-15.0376	-11.9803	-10.2705	-10.1323
7.5	-7.97872	-5.64247	-8.64059	-3.28819		-15.1718	-12.3771	-9.88914	-9.06373
7.6	-7.60687	-5.69262	-8.38192	-3.29213		-15.5108	-12.5285	-10.5016	-8.29828
7.7	-7.1296	-5.77138	-8.38851	-3.57456		-15.8765	-12.4221	-10.2165	-8.50602
7.8	-7.36323	-5.60509	-8.88695	-2.91538		-15.9471	-12.442	-9.24158	-8.72433
7.9	-7.27931	-5.3812	-8.90532	-3.08365		-16.0024	-12.2921	-9.27652	-8.89609
8	-6.32275	-4.82956	-8.9363	-3.16956		-15.7762	-11.7344	-9.63465	-9.48674
8.1	-4.93382	-4.48574	-9.18929	-3.35731		-15.5202	-11.7719	-9.59581	-8.78279
8.2	-5.01973	-4.34851	-9.05234	-3.73487		-15.5375	-11.5017	-9.18717	-8.68885
8.3	-3.66778	-4.5754	-8.83078	-3.67552		-15.5454	-11.8582	-10.1386	-9.2011
8.4	-3.94293	-4.39304	-8.44892	-4.07346		-15.6236	-12.1548	-10.1528	-9.21775
8.5	-4.05375	-4.61684	-8.21364	-4.24926		-15.6314	-12.0272	-9.66108	-9.13598
8.6	-6.11347	-4.77271	-8.71027	-3.38622		-15.6155	-12.0272	-10.4945	-8.43361
8.7	-6.38152	-4.71692	-8.27514	-3.39965		-15.6799	-11.8951	-10.1871	-7.91678
8.8	-7.98377	-4.61334	-8.24045	-3.3504		-15.5587	-11.4958	-10.3982	-8.31661
8.9	-7.08573	-4.45783	-9.09498	-2.77356		-15.5733	-11.8497	-10.1751	-7.84686
9	-7.14079	-4.74544	-9.06411	-2.83789		-15.4075	-11.8719	-10.8574	-7.2851
9.1	-7.01232	-4.70931	-8.56109	-3.34212		-15.3036	-11.9678	-10.9145	-7.86664
9.2	-6.64083	-4.60701	-8.4899	-3.66415		-15.1665	-12.4121	-10.6774	-8.62512
9.3	-7.15734	-4.55027	-7.84449	-3.49904		-15.1839	-12.3591	-10.1717	-8.58482
9.4	-7.56976	-4.54867	-7.8868	-3.77244		-15.3594	-12.5909	-10.3849	-8.84176
9.5	-7.51971	-4.71401	-7.68311	-3.99235		-15.5347	-12.9078	-9.81278	-8.92883
9.6	-7.99026	-4.60194	-7.24963	-3.92976		-15.5449	-12.9994	-10.3767	-9.58858
9.7	-7.10547	-4.40913	-7.67358	-3.49565		-15.6664	-13.1885	-10.3238	-9.7506
9.8	-7.6696	-4.33447	-7.39104	-3.68925		-15.5225	-12.9955	-10.5917	-8.93453
9.9	-7.45779	-3.72373	-7.32136	-3.9147		-15.468	-12.3228	-10.5626	-9.26305
10	-6.89779	-3.51423	-7.44663	-3.88144		-15.2547	-12.0768	-11.4158	-9.79587
10.1	-7.03999	-3.25848	-7.44407	-3.61941		-15.3449	-11.9763	-11.2463	-9.35421
10.2	-7.60137	-3.25224	-7.44455	-3.68702		-15.3934	-12.2298	-11.0804	-9.74565
10.3	-7.1807	-3.69466	-8.11205	-3.78168		-15.5553	-12.3351	-11.3285	-9.03509
10.4	-6.837	-3.88033	-8.39741	-3.79731		-15.3593	-12.8435	-10.7311	-8.54202
10.5	-6.47178	-3.88085	-7.55185	-4.47868		-15.4362	-13.2819	-9.81491	-7.99034
10.6	-6.80888	-3.6471	-7.55929	-4.60645		-15.1757	-13.5052	-10.0238	-7.52863
10.7	-6.24247	-3.30623	-7.58644	-4.35572		-14.6371	-13.3555	-9.52233	-7.84334
10.8	-6.33115	-3.61141	-6.93269	-4.1154		-14.4142	-13.3597	-9.65528	-7.18569
10.9	-6.61544	-3.85445	-5.96703	-3.58753		-14.3445	-13.3448	-10.2796	-7.34094
11	-7.81637	-3.74631	-5.28677	-2.96315		-14.2967	-13.0257	-10.4944	-7.6997
11.1	-7.88139	-3.91466	-6.58932	-2.83716		-14.5801	-12.4892	-10.0522	-8.03015
11.2	-7.84898	-3.92834	-7.69813	-2.60127		-14.6601	-11.7702	-8.99487	-7.89169
11.3	-8.20412	-3.6181	-8.18256	-3.06233		-14.7767	-11.4969	-9.0349	-8.31785
11.4	-7.56532	-3.27131	-8.07438	-2.95629		-14.1631	-10.9764	-7.9439	-9.1752
11.5	-7.55625	-3.18494	-6.94632	-2.47907		-13.5875	-10.926	-6.40149	-10.1908
11.6	-6.71808	-3.82505	-5.71619	-2.46388		-13.4437	-11.2214	-6.05015	-9.23678
11.7	-6.74067	-3.71735	-3.81832	-2.57987		-13.2721	-11.4031	-6.30915	-9.27719
11.8	-6.19211	-3.96912	-2.55439	-2.73361		-13.0871	-11.349	-5.89624	-8.91992
11.9	-6.23599	-3.9723	-3.16257	-3.22039		-13.1064	-10.9456	-4.95172	-8.34294
12	-5.94743	-4.14564	-3.55458	-3.12784		-13.3898	-10.8445	-5.14993	-8.15787
12.1	-6.49321	-3.90379	-4.47163	-3.101		-13.147	-10.9052	-4.39082	-7.71401
12.2	-5.36494	-3.69351	-3.21855	-2.91165		-12.9049	-10.852	-3.39917	-7.56458
12.3	-6.54656	-3.50356	-3.22138	-2.45956		-12.5564	-11.186	-3.34913	-7.43412
12.4	-6.48241	-3.66947	-3.72845	-2.27479		-12.3777	-11.501	-4.06119	-7.75033
12.5	-6.81843	-3.55271	-4.2741	-2.16898		-12.1233	-11.1268	-3.80917	-8.36707
12.6	-6.69865	-3.76515	-4.34131	-2.60925		-11.9988	-10.475	-2.95385	-8.82751
12.7	-6.52932	-3.34224	-4.30585	-3.18601		-12.1533	-10.1124	-3.22801	-8.27964
12.8	-6.76782	-3.30917	-2.9003	-3.45844		-12.5465	-10.3528	-2.53331	-8.59668
12.9	-7.21065	-3.18262	-2.69081	-3.77487		-12.6523	-10.0443	-1.24167	-8.22198
13	-6.89228	-2.83969	-2.70485	-3.55348		-12.7146	-10.1558	-1.21018	-7.07645
13.1	-7.19609	-2.56013	-3.40855	-3.43354		-12.5309	-10.453	-1.54961	-7.18948
13.2	-6.73521	-2.53863	-4.21868	-3.222		-12.3734	-10.6119	-1.72167	-7.02437
13.3	-6.22533	-2.5423	-5.44136	-2.77103		-11.8859	-10.4956	-1.4842	-6.5334
13.4	-7.2021	-2.7203	-5.86041	-2.59891		-11.5819	-10.4768	-2.13988	-6.65394
13.5	-7.08513	-2.75058	-5.53629	-2.52645		-11.2866	-10.8124	-1.90501	-6.18365
13.6	-7.32254	-2.76624	-4.61274	-2.56359		-11.1533	-10.1156	-0.977592	-6.51106
13.7	-6.95783	-2.86909	-3.55264	-2.18681		-10.9927	-9.71853	-1.06659	-6.99691
13.8	-6.56698	-2.7068	-3.55157	-1.76567		-10.9831	-9.43581	-1.34358	-6.58084
13.9	-6.11777	-2.48072	-2.47792	-2.01561		-11.3071	-9.25755	-1.08559	-7.0165
14	-5.83337	-2.52389	-1.52777	-1.69362		-11.246	-8.72584	-0.719189	-6.3746
14.1	-4.74292	-2.42637	-0.204773	-1.51364		-11.1692	-8.40994	-1.32798	-6.18613
14.2	-5.48246	-2.55888	-0.486957	-1.67883		-11.0954	-8.24107	-1.24842	-7.1716
14.3	-4.7441	-2.4208	-1.48465	-2.04558		-10.8153	-7.96477	-0.239801	-7.18886
14.4	-4.43283	-2.41121	-2.05139	-1.68397		-10.9373	-7.47681	-0.79531	-7.32718
14.5	-5.09869	-2.35257	-1.02931	-1.70853		-10.6124	-8.02079	-0.511434	-7.63679
14.6	-6.46689	-2.4438	-1.87279	-2.07913		-10.799	-8.4709	-0.436109	-6.5955
14.7	-7.03927	-2.53865	-1.26199	-2.4667		-10.9705	-8.95626	0.0933805	-6.36158
14.8	-7.05726	-2.4352	-0.377959	-1.68986		-10.7308	-8.77111	-0.443867	-6.39516
14.9	-6.71681	-2.24972	1.36738	-1.61463		-10.6968	-8.45892	-0.224404	-6.03605
15	-7.30436	-2.1542	1.15554	-1.83788		-10.885	-7.88692	0.178541	-6.9858
15.1	-5.87634	-1.91	0.351478	-1.9453		-10.8291	-6.92409	-0.437104	-6.91238
15.2	-5.78747	-1.63646	-0.317925	-1.61906		-10.889	-6.10282	-0.204283	-7.2573
15.3	-6.50005	-1.75437	-0.603622	-1.7667		-10.6978	-6.19477	0.428966	-7.52133
15.4	-6.43757	-1.83169	-1.0432	-2.08056		-10.6026	-6.24859	0.382063	-6.84912
15.5	-5.00268	-1.69876	-0.983826	-2.14579		-10.3816	-6.77193	-0.257459	-6.60001
15.6	-5.21228	-1.62516	-1.1466	-1.74148		-10.1134	-7.36594	-0.00879854	-6.36612
15.7	-5.60973	-1.9677	-0.462497	-1.55323		-10.1051	-7.6477	0.670307	-5.35541
15.8	-5.25799	-2.26132	-1.13054	-1.46232		-10.3472	-7.56852	-0.0813597	-5.49945
15.9	-4.08223	-1.9698	-1.68918	-1.60594		-10.188	-7.46942	0.0496364	-5.5208
16	-5.01409	-1.3827	-2.7847	-1.86115		-10.1526	-7.33354	0.854253	-5.43265
16.1	-6.27611	-1.62172	-2.64556	-1.99743		-10.0033	-7.30011	0.420119	-5.00237
16.2	-6.88128	-1.53206	-2.25406	-2.64685		-9.85385	-6.69986	-0.196878	-4.31644
16.3	-6.7469	-1.35318	-2.92304	-3.00999		-9.75969	-6.52185	-0.0490163	-4.47505
16.4	-7.35596	-1.65606	-1.73608	-2.46366		-9.60783	-6.45978	0.826526	-4.85062
16.5	-7.1452	-1.96943	-0.917562	-1.70097		-9.73734	-6.34366	0.481014	-4.61711
16.6	-6.03511	-1.83858	-1.89318	-1.04491		-9.97343	-6.2464	0.799516	-5.16617
16.7	-5.50308	-1.32472	-2.0277	-0.988123		-9.92361	-6.61485	1.5134	-5.77645
16.8	-5.74152	-1.16454	-2.48161	-1.24496		-10.0647	-6.81398	1.15259	-6.17867
16.9	-6.20598	-1.59933	-2.6253	-1.19433		-9.85201	-6.55423	0.225962	-5.66233
17	-6.08971	-1.96692	-1.96107	-1.75893		-9.94218	-6.41405	0.218383	-4.847
17.1	-5.30604	-2.1954	-2.60763	-1.92173		-10.0966	-6.16676	0.781166	-5.12435
17.2	-5.2381	-2.16755	-1.62284	-1.02569		-9.8835	-6.24217	0.362249	-5.19208
17.3	-5.53561	-2.11553	-1.58678	-0.87508		-9.74206	-6.20347	0.895538	-4.36451
17.4	-5.34474	-1.49993	-2.14826	-0.852662		-9.54444	-6.33866	2.02392	-4.40777
17.5	-4.9435	-1.21102	-2.79104	-1.24084		-9.38937	-6.69149	1.81354	-4.26667
17.6	-5.05435	-1.27853	-2.73194	-1.46694		-9.6221	-6.98288	0.94903	-4.56394
17.7	-4.78759	-1.47407	-2.43148	-1.03726		-9.65363	-6.65691	0.788279	-3.80804
17.8	-5.34716	-1.5793	-0.687371	-1.08307		-9.64092	-6.88967	1.04926	-3.89792
17.9	-5.22216	-1.43178	0.54233	-1.19178		-9.86291	-6.58719	0.00612599	-4.77299
18	-5.31342	-1.1027	0.803425	-0.716259		-9.46176	-6.24518	0.205368	-5.55913
18.1	-5.4903	-0.981705	0.788519	-0.979705		-9.12727	-5.60994	1.13316	-4.78612
18.2	-5.31468	-0.569534	1.19578	-1.18611		-8.92035	-5.33266	1.15903	-4.91986
18.3	-4.76774	-0.683894	1.04956	-0.994128		-8.7331	-5.34232	0.502033	-5.11289
18.4	-5.82941	-1.06008	1.3118	-0.628697		-8.8355	-5.64223	0.723209	-5.13089
18.5	-5.99801	-1.56398	1.49365	-0.286517		-8.75686	-5.82051	1.25185	-5.77329
18.6	-7.08635	-2.03503	1.24216	-0.159264		-8.94937	-6.28677	0.514321	-6.07794
18.7	-6.61932	-1.94273	2.32501	-0.769109		-9.29533	-6.35318	0.701967	-6.80327
18.8	-6.05741	-1.96355	1.02153	-0.834016		-8.92517	-6.06358	1.34209	-6.85899
18.9	-5.91323	-1.75753	0.0654309	-0.981892		-8.70368	-6.60938	1.08476	-5.44981
19	-6.25638	-1.78953	-0.783684	-1.11438		-8.59524	-5.9369	0.305235	-4.97953
19.1	-4.98157	-1.795	-0.698747	-1.2396		-8.11018	-5.25739	0.299521	-4.84384
19.2	-4.75716	-1.55663	-1.38144	-1.11902		-7.92134	-5.2249	0.841904	-4.13082
19.3	-4.53627	-1.55398	-0.54021	-1.35747		-8.07163	-4.94648	-0.105762	-3.82653
19.4	-4.235	-1.41417	-0.656651	-1.18218		-8.65915	-5.00506	0.368843	-3.29464
19.5	-3.08453	-0.988506	-0.494256	-1.79027		-8.97005	-4.69155	1.70777	-3.55972
19.6	-2.95371	-0.847717	0.787894	-1.40419		-8.97208	-4.15673	1.69365	-3.17564
19.7	-3.67422	-0.54631	1.02991	-1.10765		-8.59846	-5.16185	1.12829	-3.39521
19.8	-3.9732	-1.02992	0.589021	-1.25042		-8.28781	-4.66509	1.2973	-3.86699
19.9	-2.83276	-1.12772	0.652912	-1.77425		-7.92285	-4.67757	1.54067	-3.83979
20	-2.3171	-1.11906	-0.0425308	-1.81634		-7.86011	-4.87414	1.27982	-3.57879
20.1	-2.83128	-1.22074	0.080992	-1.8871		-7.96178	-4.46036	0.313035	-3.14994
20.2	-3.20891	-1.37215	-0.546511	-1.88026		-8.36533	-4.544	0.31838	-4.19105
20.3	-2.69599	-0.867458	-2.3966	-1.88109		-8.65421	-3.94975	0.915714	-3.96378
20.4	-2.06846	-0.449527	-1.49147	-1.24296		-8.91988	-3.5687	0.641192	-3.37248
20.5	-3.10969	-0.0348548	-1.88403	-1.03863		-8.64052	-4.31588	0.1392	-3.98376
20.6	-2.27153	0.239536	-0.626943	-0.918508		-8.27814	-4.72073	0.264885	-3.63563
20.7	-2.59818	0.567489	0.115075	-0.661107		-8.11186	-5.54928	0.550535	-3.74882
20.8	-3.23815	0.606018	-0.0236277	-0.496763		-7.73561	-6.02719	0.841904	-4.33525
20.9	-4.29785	0.544447	-1.00344	-0.303898		-7.36224	-5.66267	-0.105762	-5.01744
21	-4.66705	-0.111081	-1.32181	-0.437775		-7.26299	-5.27453	0.368843	-5.44569
21.1	-3.93895	-0.209934	-2.40002	-0.20229		-7.39359	-4.90655	1.70777	-5.03571
21.2	-2.96462	-0.603476	-2.77076	0.243843		-7.48259	-4.41421	1.69365	-4.14955
21.3	-3.69109	-1.01052	-2.26947	0.142507		-7.62023	-4.34279	1.12829	-3.83065
21.4	-2.78719	-0.831763	-1.24909	-0.161266		-7.5605	-4.28581	1.2973	-3.95624
21.5	-2.7974	-0.669819	-0.0528912	-0.141273		-7.77331	-4.43117	1.54067	-4.29249
21.6	-2.97154	-0.638461	-0.00326233	-0.377153		-7.83917	-4.43948	0.758757	-4.7011
21.7	-2.95943	-0.511537	-0.326952	-1.18859		-7.97343	-3.90831	0.937817	-4.50733
21.8	-2.62111	-0.63616	-0.518941	-0.914679		-7.98101	-4.0837	1.6475	-4.31124
21.9	-2.07502	-0.877787	-0.490835	-0.606818		-7.98803	-4.41062	1.20776	-4.13685
22	-1.99467	-0.930621	-1.38144	-0.338384		-7.73339	-4.41589	0.161001	-4.22287
22.1	-2.98015	-0.905331	-0.54021	-0.21425		-7.60535	-4.59737	0.0338008	-4.54695
22.2	-3.21703	-0.789261	-0.656651	-0.301539		-7.36486	-4.65724	0.275918	-5.5487
22.3	-3.20613	-0.443908	-0.494256	0.305401		-7.21942	-4.73265	-0.707642	-6.78001
22.4	-4.08748	-0.433525	0.787894	-0.0413791		-7.21934	-4.76969	-0.439137	-6.91927
22.5	-3.94643	-0.204223	1.02991	-0.717534		-7.0433	-4.56437	0.698789	-6.36834
22.6	-3.63921	-0.251202	0.589021	-0.729177		-7.29618	-4.80713	0.259783	-6.3298
22.7	-2.9652	-0.414087	0.652912	-1.17699		-7.24989	-4.75727	-0.558638	-5.75761
22.8	-2.84672	-0.26071	-0.0425308	-1.44296		-7.30034	-4.56825	-0.184194	-4.84012
22.9	-3.26482	0.0234899	0.080992	-1.41319		-7.01968	-4.46514	0.793028	-3.51334
23	-2.35178	0.109068	-0.546511	-1.3499		-6.85889	-4.35531	0.227648	-2.44681
23.1	-1.3152	0.298218	-2.3966	-0.600134		-6.68342	-4.42709	0.592163	-2.10298
23.2	-2.55621	0.190323	-1.49147	-0.766505		-6.52522	-4.76498	1.45108	-1.12584
23.3	-3.23549	0.266514	-1.88403	-0.245061		-6.51132	-4.88781	1.43879	-1.04947
23.4	-3.61931	0.000574111	-0.626943	0.046074		-6.88592	-5.72515	0.243144	-2.3776
23.5	-3.71938	-0.0720895	0.115075	0.447207		-6.96141	-5.86172	0.428689	-3.51678
23.6	-3.9842	0.223694	-0.0236277	0.805188		-7.39645	-5.99728	0.807471	-4.44988
23.7	-3.95338	0.466093	-1.00344	0.718424		-7.09579	-6.0142	0.149287	-5.70166
23.8	-2.3517	0.54587	-1.32181	0.497431		-6.98928	-5.19434	-0.996118	-4.99884
23.9	0.100866	0.229626	-2.40002	0.0720447		-6.80063	-4.87421	0.119817	-4.32007
24	0.578185	-0.160575	-2.77076	-0.671207		-6.56713	-4.52719	0.0949408	-3.71874
24.1	0.980256	-0.181791	-2.26947	-0.866469		-6.52994	-3.85268	-0.495374	-3.08126
24.2	0.911135	-0.210348	-1.24909	-0.844031		-6.24797	-3.34089	-0.439137	-3.13609
24.3	0.240836	-0.119509	-0.0528912	-0.70245		-6.16086	-3.09741	0.698789	-2.73964
24.4	-0.465357	0.217128	-0.00326233	-0.831198		-6.46826	-3.6372	0.259783	-3.23122
24.5	-2.09038	0.553324	-0.447257	-0.691471		-6.48311	-4.31547	-0.558638	-3.36165
24.6	-2.29872	0.891524	-0.199702	-0.685841		-6.42137	-4.43707	-0.184194	-2.4826
24.7	-2.42308	0.786126	-0.359081	-0.650588		-6.17331	-5.0117	0.793028	-3.32174
24.8	-2.51613	0.859473	-0.878355	-0.462909		-6.11785	-5.2996	0.227648	-4.22934
24.9	-1.72929	1.00273	-1.80646	0.0663509		-6.44668	-4.96791	0.592163	-4.29442
25	-1.98812	0.685048	-2.29485	0.289426		-6.05138	-3.75504	1.45108	-4.86675
25.1	-1.3323	0.298586	-1.68581	0.112811		-6.17211	-3.70167	1.43879	-4.90325
25.2	-0.789797	-0.0500869	-0.585114	-0.194605		-6.28361	-3.78892	0.764212	-4.54245
25.3	-1.28322	-0.459582	0.115075	-0.255807		-6.33221	-4.20819	-0.196092	-3.74365
25.4	-0.949256	-0.499849	-0.0236277	-1.25311		-6.05586	-3.94142	-0.521645	-2.95821
25.5	-0.825996	-0.712762	-1.00344	-0.914679		-5.81084	-3.56289	-0.142756	-3.13205
25.6	-0.77618	-0.121928	-1.32181	-0.606818		-5.51844	-3.81083	-0.515927	-2.76659
25.7	-0.511321	0.179301	-2.40002	-0.338384		-5.81057	-3.83922	0.225217	-2.24201
25.8	-0.52672	0.322719	-2.77076	-0.21425		-5.66547	-3.30411	0.0839075	-2.56261
25.9	-0.949715	0.471794	-2.26947	-0.301539		-5.61404	-3.54024	0.762804	-2.64545
26	-1.8354	0.589954	-1.24909	0.305401		-5.76045	-3.73159	0.841904	-2.79383
26.1	-2.94433	0.3675	-0.0528912	-0.0413791		-5.80441	-4.39016	-0.105762	-3.46109
26.2	-3.51546	0.163707	-0.00326233	-0.717534		-5.58509	-4.06888	0.368843	-4.31813
26.3	-3.01123	0.0670583	-0.326952	-0.729177		-5.75506	-3.66674	1.70777	-4.48898
26.4	-2.69721	0.213382	-0.518941	-1.17699		-5.76135	-4.32244	1.69365	-3.85748
26.5	-2.44152	0.0026143	-0.490835	-1.44296		-5.98111	-4.38093	1.12829	-3.82577
26.6	-1.69947	0.149617	-1.38144	-1.41319		-6.02658	-3.94005	1.2973	-2.66215
26.7	-2.312	0.0504544	-0.54021	-1.3499		-5.74823	-3.92195	1.54067	-1.92438
26.8	-1.54098	0.124495	-0.656651	-0.600134		-5.75265	-3.38445	0.758757	-1.81468
26.9	-1.68331	-0.168089	-0.494256	-0.766505		-5.38025	-3.16162	0.937817	-1.63432
27	-2.2807	-0.41038	0.787894	-0.245061		-5.25154	-2.57239	1.6475	-1.95059
27.1	-1.85758	-0.181647	1.02991	0.046074		-5.50967	-2.11633	1.20776	-1.15452
27.2	-1.0851	-0.045932	0.589021	0.447207		-5.76437	-2.75544	0.161001	-0.661763
27.3	-1.00245	0.109068	0.773217	0.805188		-6.03648	-2.96936	0.0338008	-0.711664
27.4	-0.994025	0.298218	-0.361769	0.718424		-6.0255	-3.12141	0.275918	-0.00101085
27.5	-0.344699	0.190323	-0.0507622	0.497431		-6.00599	-3.83724	-0.707642	-0.21829
27.6	1.92618	0.266514	-1.0496	0.0720447		-6.04496	-4.02042	-0.439137	-1.50268
27.7	2.23881	0.000574111	-1.13034	-0.671207		-5.58147	-3.95477	0.698789	-1.895
27.8	1.90728	-0.0720895	0.146731	-0.866469		-5.49149	-3.46466	0.259783	-2.64721
27.9	1.28064	0.223694	-0.692474	-0.844031		-5.30781	-3.07493	-0.0235069	-2.85957
28	0.807587	0.466093	0.746065	-0.70245		-5.62931	-3.04976	-0.939961	-3.01387
28.1	-0.497366	0.54587	1.02991	-0.831198		-5.76731	-2.89148	0.163085	-2.99989
28.2	-2.06	0.229626	0.589021	-0.691471		-5.51784	-2.70911	-0.0182103	-3.3916
28.3	-2.59184	-0.160575	0.226944	-0.685841		-5.55061	-3.01558	-0.506933	-3.77351
28.4	-1.24094	-0.181791	0.297388	-0.527815		-5.61007	-2.89455	-0.221365	-3.75849
28.5	-1.19818	-0.210348	0.744527	-0.297804		-5.13992	-2.78749	0.497067	-2.77868
28.6	-0.775917	-0.119509	-0.455524	-0.424189		-4.75459	-2.84931	0.706171	-2.85218
28.7	-1.03984	0.217128	0.0175078	-0.52344		-4.47525	-3.32513	0.481014	-2.20238
28.8	-0.571217	0.553324	1.11573	-0.51707		-4.63027	-3.66552	0.799516	-1.81023
28.9	-0.0573726	0.891524	0.743585	-0.863234		-4.45822	-4.06458	1.5134	-1.26689
29	-0.837404	0.786126	0.529065	-0.959435		-4.4759	-3.93644	1.15259	-2.10375
29.1	-1.94441	0.859473	-0.326359	-0.975974		-4.66252	-3.64709	0.225962	-2.52457
29.2	-1.97002	1.00273	0.141744	-0.766505		-4.72555	-2.92359	0.218383	-2.23353
29.3	-1.78107	0.685048	0.211728	-0.245061		-4.79266	-2.44507	0.781166	-2.26671
29.4	-0.933218	0.298586	-0.337023	0.046074		-4.76326	-2.08677	0.362249	-3.3649
29.5	1.12002	-0.0500869	1.06212	0.447207		-4.75855	-2.1847	0.895538	-2.98682
29.6	1.78286	-0.459582	-0.617774	0.805188		-4.83582	-2.35162	2.02392	-3.50108
29.7	2.62597	-0.499849	-0.443329	0.718424		-4.59713	-2.86668	1.81354	-3.37706
29.8	1.21093	-0.712762	-1.47811	0.497431		-4.71465	-3.24562	0.94903	-4.67889
29.9	0.598701	-0.121928	-2.54458	0.0720447		-4.78975	-3.51674	0.788279	-5.59942
30	-0.885706	0.179301	-1.82983	-0.671207		-4.66759	-3.74457	1.04926	-4.8933
30.1	-0.177942	0.322719	-0.0662596	-0.866469		-4.61028	-3.96012	0.125394	-4.1788
30.2	0.150086	0.471794	1.14546	-0.844031		-4.61475	-3.80463	0.263727	-4.49826
30.3	1.63366	0.589954	2.06167	-0.70245		-4.44107	-3.94991	0.890367	-2.94895
30.4	1.41081	0.3675	1.64641	-0.831198		-4.11852	-3.71633	0.298393	-2.20082
30.5	0.470979	0.163707	1.03243	-0.691471		-3.76682	-3.70153	0.32361	-1.16732
30.6	-0.376713	0.0670583	-0.602086	-0.685841		-3.7032	-3.62044	0.0152767	-2.02226
30.7	-1.0772	0.213382	-1.71225	-0.501026		-3.97667	-3.52096	0.187769	-2.54292
30.8	-1.98313	0.0026143	-2.06953	-0.434493		-4.21554	-3.84426	0.0281765	-1.98899
30.9	-1.93589	0.149617	-1.32557	-0.453108		-4.51905	-3.70677	-0.939961	-1.80405
31	-1.8053	0.0504544	-0.203685	-0.423255		-4.80811	-3.68656	0.163085	-2.98468
31.1	-0.742021	0.124495	0.476239	-0.273145		-4.84393	-3.84993	-0.0182103	-2.07112
31.2	-0.465157	-0.168089	1.3344	-0.265578		-4.52891	-3.83423	-0.506933	-1.24336
31.3	-1.11411	-0.41038	-0.75881	0.0556232		-4.22049	-4.0484	-0.221365	0.591505
31.4	-0.925156	-0.181647	-0.443329	0.359816		-3.70634	-4.09677	0.497067	0.718238
31.5	-0.857808	-0.045932	-1.47811	0.148194		-3.71638	-3.84304	0.706171	1.00921
31.6	-1.23996	0.109068	-2.54458	0.270393		-3.51999	-3.13121	0.481014	0.417898
31.7	-1.77132	0.298218	-1.82983	0.121156		-3.779	-2.04315	0.799516	-0.630803
31.8	-0.322623	0.190323	-0.0662596	0.143488		-3.75024	-1.65724	1.5134	-2.14955
31.9	0.662437	0.266514	1.14546	0.15657		-3.78763	-1.76433	1.15259	-2.35389
32	1.5381	0.000574111	2.06167	-0.249987		-3.81961	-2.1755	0.225962	-2.22408
32.1	1.61891	-0.0720895	1.64641	-0.400766		-3.53195	-2.89014	0.218383	-1.4508
32.2	2.23216	0.223694	1.03243	-0.503079		-3.46585	-3.49558	0.781166	-1.151
32.3	3.11535	0.466093	-0.475926	-0.854155		-3.63821	-3.89733	0.362249	-1.00679
32.4	2.00119	0.54587	-1.78499	-0.637793		-3.64817	-3.95299	0.895538	-2.28461
32.5	1.15051	0.229626	-2.66637	-0.287837		-3.87212	-3.88536	2.02392	-3.28689
32.6	0.572969	-0.160575	-1.00234	-0.32122		-3.75619	-4.01336	1.81354	-2.82541
32.7	0.555555	-0.181791	-0.396394	-0.59206		-3.94696	-3.93436	0.94903	-2.64029
32.8	1.45356	-0.210348	0.285478	-1.15272		-4.01918	-3.48686	0.788279	-2.25098
32.9	1.52058	-0.119509	0.524272	-1.261		-3.5112	-2.39613	1.04926	-2.11102
33	2.08266	0.217128	0.44094	-1.40827		-3.42589	-1.39464	0.00612599	-1.59576
33.1	2.33909	0.553324	0.744527	-0.744869		-3.25593	-0.248827	0.205368	-1.29466
33.2	1.74452	0.891524	-0.455524	-0.663336		-3.12971	0.728534	1.13316	-1.8961
33.3	1.06384	0.842106	0.0175078	-0.00813889		-3.0243	1.29121	1.15903	-1.40236
33.4	0.268565	0.864042	1.11573	-0.504138		-3.33819	0.897479	0.502033	-0.823349
33.5	0.25664	0.768062	0.743585	-0.67368		-3.88848	0.779662	0.723209	-1.46213
33.6	-0.251206	0.607511	0.529065	-1.02611		-4.05463	-0.0409713	1.25185	-1.37057
33.7	0.577899	0.0904875	-0.326359	-1.89275		-4.22696	-0.448237	0.514321	-1.72114
33.8	0.925226	-0.287568	0.141744	-1.87095		-4.29975	-0.972893	0.701967	-1.2925
33.9	1.13867	-0.300833	0.211728	-1.31042		-4.13766	-0.597131	1.34209	-0.582286
34	1.44061	-0.074727	-0.337023	-0.762755		-3.73584	0.0628426	1.08476	-0.531893
34.1	1.32959	0.109068	1.06212	-0.0669593		-3.29959	0.91626	0.305235	-0.671091
34.2	1.34683	0.298218	-0.135431	-0.215453		-3.28848	1.09294	0.299521	-0.519123
34.3	0.518192	0.190323	-1.10006	0.140137		-3.15859	1.30889	0.841904	-0.109248
34.4	-0.474182	0.266514	-2.63043	-0.492777		-2.93248	0.75949	-0.105762	-0.0753807
34.5	-0.599437	0.000574111	-2.11771	-1.74525		-3.15143	0.231192	0.368843	-0.674609
34.6	-2.15311	-0.0720895	-1.64091	-1.28719		-3.05624	-0.445745	1.70777	0.00579664
34.7	-2.56721	0.223694	-0.624633	-0.990689		-3.0094	-0.832036	1.69365	-0.454984
34.8	-2.48938	0.466093	-0.30443	-0.154141		-2.9852	-0.860954	1.12829	-0.88085
34.9	-2.27577	0.54587	1.10788	0.0765981		-2.9846	-0.332139	1.2973	-1.71742
35	-1.28504	0.229626	0.744527	0.379083		-3.3305	-0.227959	1.54067	-1.47922
35.1	-0.833437	-0.160575	-0.455524	0.256169		-3.19376	-0.240796	1.27982	-1.2162
35.2	-0.625382	-0.181791	0.0175078	-0.578491		-2.98516	0.0852443	0.313035	-2.67695
35.3	0.109089	-0.210348	1.11573	-1.34948		-3.07995	0.222433	0.31838	-2.01278
35.4	-0.659884	-0.119509	0.743585	-1.261		-2.81745	0.0771661	0.915714	-1.80292
35.5	-0.078265	0.217128	0.529065	-1.40827		-3.04172	0.0408655	0.641192	-1.90803
35.6	-0.298634	0.553324	-0.326359	-0.920856		-3.21449	0.142285	0.244336	-0.781152
35.7	-0.412299	0.891524	0.141744	-0.578186		-3.44669	0.456678	0.522028	0.444847
35.8	-0.203595	0.786126	0.211728	0.292069		-3.4834	0.363232	-0.257238	0.664937
35.9	0.174692	0.859473	-0.337023	-0.256176		-3.39427	-0.129286	0.417856	-0.0859045
36	0.737671	1.00273	0.797905	-0.010432		-3.22878	-0.330665	0.026127	-1.34718
36.1	1.29961	0.685048	-0.254261	0.0978646		-3.09385	-0.350553	-0.9092	-1.64255
36.2	0.93219	0.298586	-0.390148	0.289276		-3.10909	-0.617457	0.360351	-2.39831
36.3	0.482839	-0.0500869	-1.14038	0.144121		-3.06555	-0.0856505	0.412459	-2.03693
36.4	-0.780262	-0.459582	-0.988468	-0.249987		-2.7607	0.610565	0.259783	-1.50738
36.5	-1.67946	-0.499849	-0.525797	-0.400766		-2.53814	1.08042	-0.558638	-0.747862
36.6	-1.94662	-0.712762	-0.555494	-0.503079		-2.35886	0.897479	-0.184194	-0.46285
36.7	-1.48155	-0.121928	0.810843	-0.854155		-2.44066	0.779662	0.793028	-0.820093
36.8	-0.324306	0.179301	1.02991	-0.637793		-2.21367	-0.0409713	0.227648	-1.0819
36.9	-0.961467	0.322719	0.589021	-0.287837		-2.0663	-0.448237	0.592163	-0.561646
37	-0.400669	0.471794	0.584889	-0.32122		-2.23888	-0.972893	1.45108	0.209835
37.1	-0.349766	0.589954	-0.326359	-0.59206		-2.21474	-0.597131	1.43879	1.16193
37.2	0.572678	0.3675	0.141744	-1.15272		-2.16545	0.0628426	0.372732	0.431648
37.3	0.484535	0.163707	0.211728	-1.18191		-2.16416	0.91626	0.184951	-0.394237
37.4	-0.222154	0.0670583	-0.337023	-1.37085		-2.45475	1.09294	0.668629	-0.704548
37.5	-0.112023	0.213382	1.06212	-0.879264		-2.4749	1.30889	-0.366504	-2.00668
37.6	0.257564	-0.0533657	-0.313059	-1.32382		-2.24961	0.75949	-0.197734	-2.33421
37.7	0.0970102	0.145048	-1.0149	-0.684887		-2.167	0.231192	0.703356	-1.35298
37.8	0.673187	0.285123	-1.64257	-0.533277		-2.09394	-0.445745	0.769118	-0.413067
37.9	1.46236	0.202032	-2.55262	-0.246069		-2.14242	-0.832036	0.209025	0.832948
38	2.79195	0.0400094	-1.99414	-0.261793		-1.81514	-0.860954	0.123753	0.505494
38.1	1.91931	-0.172898	-0.523847	0.0609035		-1.99059	-0.332139	0.538435	0.818048
38.2	0.72178	-0.340395	0.205781	-0.454336		-1.9587	-0.227959	-0.247617	0.728079
38.3	-0.119053	-0.471054	1.00174	-0.77403		-1.95865	-0.240796	-0.616102	-0.511614
38.4	-0.386328	-0.712762	-0.254261	-1.71177		-2.005	0.0852443	1.26447	-0.407075
38.5	-0.189894	-0.121928	-0.390148	-1.2872		-1.80958	0.222433	1.77989	-0.123182
38.6	0.188784	0.179301	-1.14038	-0.948341		-1.80573	0.0771661	1.36223	0.160097
38.7	1.13209	0.322719	-0.988468	-0.628858		-1.77037	0.0408655	1.79777	-0.358652
38.8	2.22402	0.471794	-0.525797	-0.488901		-1.68799	0.142285	2.05775	0.272843
38.9	0.859521	0.589954	-0.555494	-0.115373		-1.956	0.456678	1.33401	1.35045
39	1.59375	0.3675	0.666403			-1.5816	0.109091	-0.0631935	1.3224
39.1	1.9801	0.163707	1.21093			-1.35153	-0.130385	0.299521	0.966948
39.2	2.42542	0.0670583	0.186867			-1.03889	0.228516	0.841904	2.04191
39.3	2.41734	0.213382	1.20824			-0.84346	0.807196	-0.105762	1.6249
39.4	1.70928	-0.00946868	1.00172			-1.059	0.691534	0.368843	1.03744
39.5	1.03012	0.107589	1.85377			-1.29078	0.74314	1.70777	1.07815
39.6	0.233603	-0.0570095	1.98693			-1.60899	0.718133	1.69365	0.99517
39.7	-0.626771	0.306669	1.18057			-2.13534	0.382437	1.12829	0.928927
39.8	0.306235	0.322466	1.73711			-2.10044	-0.445745	1.2973	1.06565
39.9	0.297514	0.354238	0.239741			-2.04547	-0.832036	1.76476	0.696582
40	1.16367	0.531253	-1.00407			-1.87005	-0.860954	1.14903	1.07317
40.1	1.93938	0.516011	-1.14038			-1.67389	-0.332139	-0.155455	0.371494
40.2	1.60523	0.3675	-1.27615			-1.37425	-0.227959	-0.245003	1.64638
40.3	1.80078	0.163707	-0.238571			-0.89118	-0.240796	0.19358	2.61356
40.4	1.20575	0.0670583	0.593831			-0.116973	0.0852443	0.180973	2.40216
40.5	2.11005	0.213382	1.12471			0.230795	0.222433	-0.489575	2.87865
40.6	1.54132	-0.0533657	0.196402			0.561278	0.0771661	0.969985	2.67359
40.7	0.93625	0.145048	-1.11462			0.718781	0.0408655	1.42354	0.721628
40.8	1.75328	0.285123	-1.59628			0.464104	0.142285	1.02889	-0.157587
40.9	1.21988	0.202032	-2.27774			0.283285	0.456678	1.21227	-1.03465
41	0.452568	0.0400094	-1.75384			-0.372455	0.363232	0.662467	-0.834541
41.1	0.451561	-0.172898				-0.461379	-0.129286	0.550994	-0.452846
41.2	-0.605623	-0.340395				-0.345489	-0.330665	0.144896	-0.365248
41.3	-0.54684	-0.445687				-0.162162	-0.350553	-0.0930338	0.580124
41.4	-1.04644	-0.496749				-0.352171	-0.617457	0.982081	0.861997
41.5	-1.71487	-0.420657				-0.266643	-0.0856505	1.54859	1.23599
41.6	-0.160783	-0.180906				-0.586836	0.610565		1.63612
41.7	-0.18265	-0.304751				-0.683298	1.08042		1.25325
41.8	-0.273712	0.0118037				-1.02598	0.897479		1.23414
41.9	1.04075	0.154909				-0.762491	0.779662		0.369804
42	1.23396	0.0283777				-0.225108	-0.0409713		-0.578862
42.1	0.632379	0.106487				0.367403	-0.448237		-0.899998
42.2	0.643474	-0.0174767				0.431514	-0.972893		-0.665322
42.3	0.0232419					0.734159	-0.609829		0.259518
42.4	0.235735					0.464104	0.0300805		0.711909
42.5	-0.243803					0.283285	0.651901		1.57524
42.6	-0.374617					-0.372455	1.22354		2.22356
42.7	1.127					-0.461379			2.0148
42.8	2.26272					-0.29309			1.90139
42.9	1.17362					-0.330043			1.74325
43	1.76856					-0.328092			1.62998
43.1	2.04096					-0.23097			1.42931
43.2	2.09103								0.972195
43.3	2.82659								0.679029

## Sheet: Fig 3c
E175_Ixo	E175_ACh	E175_Arec	E175_Pilo		P415_Ixo	P415_ACh	P415_Arec	P415_Pilo
-99.8347	-100	-100.392	-99.6732		-40.9738	-57.3305	-49.6639	-68.4377
-101.238	-99.9042	-99.8413	-100.184		-37.707	-56.4196	-39.3116	-61.6339
-100.567	-99.9904	-101.005	-98.9475		-32.2738	-26.8886	-17.1532	-13.9981
-98.9253	-100	-98.7346	-101.026		-53.9937	-47.6509	-2.26596	-67.3678
-100.004	-99.9808	-100.176	-100.793		-81.2908	-43.492	-60.0612	-46.9907
-99.1762	-99.9042	-99.9281	-99.3586		-40.9738	-54.1485	-62.1339	-55.1642
-102.583	-99.9997	-101.347	-100.917		-37.707	-45.8159	-22.631	-65.6771
-100.892	-99.9997	-100.602	-98.8054		-32.2738	-69.2964	-25.428	-72.8899
-101.743	-99.9042	-99.2149	-101.112		-53.9937	-70.1666	-28.1862	-39.5761
-98.6105	-99.9997	-100.493			-81.2908	-65.5054	-25.732	-39.9663
-99.305		-99.0392			-64.1352	-61.0625	-38.3504
					-48.0318	-61.9262	-27.7113
					-55.5132	-65.8938	-15.88
					-64.427	-56.9286	-21.3556
					-49.9828	-88.5116	-38.7323
					-50.4689	-68.5168	-28.7453
					-68.4247	-80.2158	-28.773
					-68.9581	-54.0318	3.21237
					-75.1618	-84.4841	-68.6481
					-73.9561	-56.7003
					-57.4828	-54.8607
					-94.1842
					-58.8228
					-45.838
					-40.1092
					-64.9661
					-50.6522
					-57.0132

## Sheet: Fig 3c - Statistics
	E175-Ixo			E175-ACh			E175-Arec			E175-Pilo
	Unpaired t test with Welch's correction			Unpaired t test with Welch's correction			Unpaired t test with Welch's correction			Unpaired t test with Welch's correction
	P value	<0.0001		P value	<0.0001		P value	<0.0001		P value	<0.0001
	P value summary	****		P value summary	****		P value summary	****		P value summary	****
	Significantly different (P < 0.05)?	Yes		Significantly different (P < 0.05)?	Yes		Significantly different (P < 0.05)?	Yes		Significantly different (P < 0.05)?	Yes
	One- or two-tailed P value?	Two-tailed		One- or two-tailed P value?	Two-tailed		One- or two-tailed P value?	Two-tailed		One- or two-tailed P value?	Two-tailed
	Welch-corrected t, df	t=10.83, df=16.69		Welch-corrected t, df	t=19.47, df=43.01		Welch-corrected t, df	t=13.88, df=15.04		Welch-corrected t, df	t=13.05, df=16.45
	How large is the effect?			How large is the effect?			How large is the effect?			How large is the effect?
	Mean of column C	-0.2616		Mean of column C	0.005		Mean of column R	-0.07027		Mean of column R	-0.09078
	Mean of column D	9.606		Mean of column D	10.43		Mean of column S	5.859		Mean of column S	4.796
	Difference between means (D - C) ± SEM	9.868 ± 0.9113		Difference between means (D - C) ± SEM	10.43 ± 0.5357		Difference between means (S - R) ± SEM	5.929 ± 0.4273		Difference between means (S - R) ± SEM	4.887 ± 0.3744
	95% confidence interval	7.942 to 11.79		95% confidence interval	9.348 to 11.51		95% confidence interval	5.019 to 6.840		95% confidence interval	4.095 to 5.679
	R squared (eta squared)	0.8754		R squared (eta squared)	0.8981		R squared (eta squared)	0.9275		R squared (eta squared)	0.912
	P415-Ixo			P415-ACh			P415-Arec			P415-Pilo
	Unpaired t test with Welch's correction			Unpaired t test with Welch's correction			Unpaired t test with Welch's correction			Unpaired t test with Welch's correction
	P value	<0.0001		P value	<0.0001		P value	<0.0001		P value	<0.0001
	P value summary	****		P value summary	****		P value summary	****		P value summary	****
	Significantly different (P < 0.05)?	Yes		Significantly different (P < 0.05)?	Yes		Significantly different (P < 0.05)?	Yes		Significantly different (P < 0.05)?	Yes
	One- or two-tailed P value?	Two-tailed		One- or two-tailed P value?	Two-tailed		One- or two-tailed P value?	Two-tailed		One- or two-tailed P value?	Two-tailed
	Welch-corrected t, df	t=11.83, df=65.92		Welch-corrected t, df	t=13.56, df=60.86		Welch-corrected t, df	t=5.591, df=38.19		Welch-corrected t, df	t=7.137, df=22.94
	How big is the difference?			How big is the difference?			How big is the difference?			How big is the difference?
	Mean of column K	-6.76		Mean of column K	-6.384		Mean of column K	-7.486		Mean of column K	-4.548
	Mean of column L	-15.52		Mean of column L	-16.15		Mean of column L	-10.92		Mean of column L	-9.712
	Difference between means (L - K) ± SEM	-8.762 ± 0.7407		Difference between means (L - K) ± SEM	-9.765 ± 0.7201		Difference between means (L - K) ± SEM	-3.435 ± 0.6143		Difference between means (L - K) ± SEM	-5.164 ± 0.7235
	95% confidence interval	-10.24 to -7.283		95% confidence interval	-11.20 to -8.325		95% confidence interval	-4.678 to -2.191		95% confidence interval	-6.661 to -3.667
	R squared (eta squared)	0.6798		R squared (eta squared)	0.7513		R squared (eta squared)	0.4502		R squared (eta squared)	0.6895

## Sheet: Fig 3d
Time (s)	F181_Ixo_GoA	F181_ACh_GoA	F181_Arec_GoA	F181_Pilo_GoA		F181_Ixo_endo	F181_ACh_endo	F181_Arec_endo	F181_Pilo_endo
0	1.48906	-0.716251	-0.583025	1.36533		0.124613	0.0712207	0.0829421	-0.489267
0.1	1.2122	-0.369769	-0.497289	0.367538		0.261235	-0.0639464	0.65787	0.220634
0.2	0.657172	-0.167253	-0.192385	-0.802418		0.0223175	-0.247204	0.292043	0.121074
0.3	-0.231684	0.269666	0.27437	-1.00355		-0.232114	-0.622539	-0.37148	0.120827
0.4	-0.754765	0.50113	0.186645	-0.365971		-0.0457831	-0.673406	-0.324688	-0.0319517
0.5	-0.46014	0.919448	0.000350014	-0.363856		0.176424	-0.452797	-1.21973	-0.966052
0.6	-0.659718	0.631282	0.17844	-0.380016		0.598738	-0.0224867	-0.0647976	-0.157478
0.7	-0.983446	0.0944171	0.224576	0.355182		0.540304	0.554583	-0.199883	-0.243071
0.8	-0.374966	-0.224151	0.00687173	0.579317		0.288212	0.435162	-1.05111	-0.656823
0.9	0.54808	-0.49966	-0.241684	0.634716		1.10675	0.380733	-0.143356	0.285621
1	0.940899	-0.630104	-0.0586121	-0.142692		1.53772	0.201996	-0.41361	-0.092885
1.1	0.25598	-0.549544	0.111219	0.39141		1.67694	-0.168872	-0.687322	-0.269123
1.2	-0.205804	-0.574961	-0.0877862	1.06084		1.0625	-0.264399	0.312693	0.12739
1.3	-0.0508524	-0.0480968	-0.203454	0.0697206		1.01976	-0.283706	0.345107	-0.432172
1.4	-0.0836522	-0.303753	-0.40776	0.0606344		0.868786	-0.0778889	0.655788	0.860629
1.5	-0.0858294	-0.514885	-0.579181	0.410652		0.591967	-0.101972	0.405216	0.764227
1.6	0.0823626	-0.620984	-0.693001	0.797309		-0.070245	-0.467475	-0.30096	0.237441
1.7	0.340757	-0.66802	-0.585433	0.496184		-0.273607	-0.65988	-0.712829	1.02719
1.8	0.962509	-0.39977	-0.227526	-0.404196		-0.550002	-0.469409	-0.90032	0.499735
1.9	0.628496	-0.032536	-0.123547	-0.7089		-0.249567	-0.381252	-1.13703	0.504959
2	0.83254	0.253679	0.197646	-0.166196		0.358576	-0.595757	-0.616464	0.688637
2.1	0.594138	0.388685	0.10397	-0.13396		0.905133	-0.510429	0.376494	-0.155982
2.2	0.233433	-0.0501623	-0.0987406	0.00224707		0.98791	-0.173198	-0.157555	0.628605
2.3	0.0724927	-0.0946531	-0.0347606	0.551837		0.668924	-0.248777	0.545158	0.184507
2.4	-0.646504	-0.225393	-0.226341	0.702926		0.784369	0.0179215	0.097339	-0.595339
2.5	-0.991297	-0.48151	-0.267531	0.936152		1.73623	-0.100722	-0.849141	0.115525
2.6	-0.44003	-0.387125	-0.158802	0.163312		1.69124	-0.231628	-0.851794	-0.170366
2.7	-0.447223	-0.300964	-0.235017	-1.0233		1.44802	-0.416875	-0.578415	0.161624
2.8	0.398328	-0.484472	-0.122371	-1.21166		0.765564	-0.638034	-1.1462	0.255885
2.9	0.664713	-0.785079	-0.00746859	-1.22243		0.319601	-0.650326	-0.582927	-0.0510689
3	0.166881	-0.925694	0.00232817	-0.671448		-0.0900096	-0.312545	-1.34976	0.983331
3.1	-0.156692	-0.569888	-0.0043015	0.21465		-0.632947	-0.17089	-1.4107	0.87533
3.2	-1.07763	-0.60241	-0.335196	0.844187		-1.08927	0.184795	-1.14946	0.198787
3.3	-1.3506	-0.541425	-0.471914	1.2403		-0.662073	-0.0209958	-1.4377	0.75339
3.4	-1.19297	-0.2099	-0.491032	0.131718		-0.813796	-0.75935	-0.977046	0.316048
3.5	-0.89696	-0.145972	-0.592996	-2.40505		-0.746669	-1.3633	-0.143688	0.0443653
3.6	0.650741	-0.174295	-0.356201	-4.17989		-0.721058	-2.0301	-0.882679	-0.105263
3.7	1.96528	-0.179523	0.124637	-5.74334		-0.418935	-2.41117	-0.298781	-1.27659
3.8	0.72743	-0.625342	0.183334	-5.49769		-0.550244	-2.74267	-0.472831	-1.1268
3.9	0.0465408	-1.23133	0.0604207	-5.19733		-0.528805	-3.06406	-1.11438	-2.27316
4	-0.693098	-2.50709	-0.149686	-5.10718		-0.415863	-3.14378	-0.254778	-3.90332
4.1	-1.09283	-3.79991	-0.453843	-4.91079		-0.221026	-3.45618	-0.961841	-4.2112
4.2	-1.74608	-5.42241	-0.821153	-4.19698		-0.174897	-3.99236	-1.62344	-4.76645
4.3	-1.76777	-6.34756	-1.50167	-3.89008		-0.642866	-4.53033	-0.807655	-5.28289
4.4	-1.55505	-7.27734	-2.31937	-3.57542		-0.80477	-4.7037	-0.853143	-5.29661
4.5	-1.06412	-7.99938	-3.19323	-3.88541		-0.594968	-4.95073	-1.30139	-6.10242
4.6	-1.90929	-8.36836	-4.32245	-2.98548		-0.0273227	-5.30247	-1.14942	-5.46939
4.7	-1.45581	-8.91531	-5.38668	-3.77274		-0.499664	-5.41487	-1.89852	-5.80111
4.8	-1.37075	-9.70372	-6.16408	-4.5853		-0.238019	-4.98971	-2.81348	-6.91265
4.9	-1.0556	-10.5528	-6.76894	-5.00111		0.23264	-5.32272	-3.16135	-6.71015
5	-1.13474	-11.3668	-7.22796	-5.59452		0.478505	-5.37843	-3.74199	-6.95281
5.1	-0.144255	-11.7843	-7.93769	-5.86461		0.543777	-5.43629	-1.971	-7.31834
5.2	-0.393284	-12.2223	-8.70607	-6.1584		0.690222	-5.4056	-1.87423	-7.16749
5.3	-0.734158	-12.7313	-9.24433	-6.13785		0.86907	-5.68807	-2.64182	-7.87059
5.4	-1.43167	-12.5919	-10.0142	-5.5376		0.761021	-5.81125	-1.99066	-7.48016
5.5	-1.04156	-12.8487	-10.6305	-6.50918		-0.0302892	-5.81758	-2.21557	-7.67368
5.6	-1.62116	-13.3447	-10.8721	-6.41332		-0.157238	-5.67024	-3.37572	-8.54859
5.7	-2.53591	-13.7502	-11.2305	-6.1637		-0.437789	-6.44205	-2.49973	-8.03972
5.8	-2.21265	-13.9445	-11.5049	-5.96971		-0.433915	-6.78692	-3.59056	-8.02231
5.9	-1.15129	-14.3328	-11.7383	-6.37192		-0.461614	-6.95401	-3.58516	-8.01128
6	-1.90688	-14.5582	-12.0015	-5.88641		-0.165544	-7.1467	-4.28514	-7.86431
6.1	-2.36885	-15.3295	-12.5611	-6.03316		0.20382	-7.12125	-4.87383	-8.44956
6.2	-1.76458	-15.419	-13.1421	-5.95162		0.425411	-7.1095	-5.37985	-7.72311
6.3	-0.592082	-15.5523	-13.3493	-6.90403		-0.276278	-6.85786	-4.23777	-7.7243
6.4	-0.773313	-16.1252	-13.4404	-7.19112		0.145361	-6.59785	-4.26164	-8.29616
6.5	-1.05057	-16.1714	-13.8679	-8.39326		0.572988	-7.12397	-3.14291	-7.9176
6.6	-0.764231	-16.2101	-14.1236	-8.73131		0.674766	-6.76568	-3.00389	-8.38973
6.7	-1.43761	-16.1144	-14.3405	-10.3308		0.0800478	-6.59084	-3.69101	-8.24119
6.8	-2.35163	-16.3553	-14.8565	-9.73439		0.226204	-6.65104	-3.32385	-8.08022
6.9	-2.55125	-16.8747	-15.2618	-9.39861		-0.0474503	-6.92739	-3.59701	-8.6288
7	-1.43028	-16.7252	-15.5885	-8.66749		-0.569749	-7.43218	-4.33224	-7.91041
7.1	-1.3725	-16.7858	-15.6882	-7.54901		-1.29137	-7.48824	-3.25824	-8.02455
7.2	-1.10522	-17.0991	-15.8069	-6.36599		-0.769626	-7.43362	-3.7828	-8.62697
7.3	-0.556405	-16.9339	-15.87	-6.49244		-0.632872	-7.77232	-4.40706	-8.53427
7.4	-0.474555	-17.2101	-16.0424	-6.26901		-0.0254194	-7.19807	-4.04162	-9.23496
7.5	-1.06609	-17.341	-16.2058	-6.54325		-0.0630919	-7.04145	-5.11033	-9.0852
7.6	-0.689437	-17.9551	-15.9771	-6.11555		-0.228732	-7.05174	-5.43316	-9.00529
7.7	-0.84293	-18.3	-15.9321	-6.83843		-0.136399	-7.30661	-5.56048	-9.48853
7.8	-1.23427	-18.3295	-16.048	-7.52667		-0.687807	-7.31796	-5.44056	-8.71723
7.9	-2.38635	-18.2785	-16.4022	-7.12948		-0.771995	-7.33765	-4.57972	-8.79022
8	-3.14134	-18.0554	-16.7416	-7.68138		-0.459	-7.53983	-4.58346	-9.275
8.1	-3.01138	-18.0699	-16.9165	-8.30621		-0.680643	-7.38214	-5.78422	-8.79605
8.2	-3.08235	-17.9151	-17.2388	-8.42803		-0.582988	-7.02721	-4.55375	-9.30872
8.3	-3.47494	-17.8609	-17.2192	-8.73607		-0.387342	-7.12178	-4.88658	-8.85029
8.4	-2.89877	-18.0656	-17.0427	-8.94486		0.0420941	-7.32386	-5.70939	-8.85508
8.5	-2.01224	-18.3331	-17.0725	-9.94769		-0.13342	-7.44253	-5.62405	-9.43627
8.6	-1.8803	-18.6758	-17.1165	-9.59012		-0.419537	-7.41305	-5.2744	-8.56665
8.7	-1.42593	-18.9235	-17.3386	-8.70442		-0.538963	-7.87089	-5.21972	-8.73896
8.8	-1.9208	-18.8911	-17.2378	-8.3912		-0.10735	-8.00759	-5.76496	-9.16698
8.9	-3.16353	-19.4714	-17.3381	-8.2424		-0.0348299	-7.56654	-6.46256	-8.77428
9	-4.05423	-19.5435	-17.5145	-8.1074		0.167198	-7.5453	-5.42541	-9.25164
9.1	-3.92698	-19.5995	-17.6423	-8.40327		0.0665007	-7.65677	-5.78718	-8.51802
9.2	-4.23499	-19.4636	-17.7776	-9.01048		-0.229079	-7.68791	-6.46067	-8.77463
9.3	-3.42161	-19.6561	-17.8918	-10.0703		-0.399558	-7.63107	-6.08231	-9.55498
9.4	-3.03634	-19.3689	-18.264	-9.15216		-0.513654	-7.81072	-5.52979	-8.73516
9.5	-2.18412	-19.1747	-18.2823	-8.80603		0.216356	-7.99306	-5.9262	-8.95632
9.6	-1.86	-18.871	-18.3468	-7.84797		-0.0696439	-8.01108	-5.9233	-9.45444
9.7	-3.11797	-19.2219	-18.3569	-7.46393		-0.00141516	-7.85775	-5.18138	-8.99418
9.8	-3.00149	-19.4575	-18.1834	-7.73659		0.237499	-8.13576	-4.92829	-9.22606
9.9	-2.61215	-19.7373	-18.2129	-7.5372		-0.0934362	-7.75112	-5.63977	-8.23757
10	-3.21038	-19.6082	-18.0415	-7.53992		0.296699	-7.54508	-5.96757	-8.50707
10.1	-4.09043	-19.9448	-18.1669	-8.12531		0.33185	-7.45181	-5.53915	-9.65538
10.2	-4.5241	-19.8734	-18.1947	-7.98937		0.548729	-7.77953	-5.70276	-9.31217
10.3	-4.30838	-19.9521	-18.2878	-8.10525		0.419926	-7.74731	-6.3997	-9.65425
10.4	-4.37425	-19.6909	-18.6708	-7.57198		0.288212	-7.92359	-6.06043	-10.4505
10.5	-4.36021	-19.9968	-18.4132	-8.52119		1.10675	-8.05256	-5.42541	-9.6274
10.6	-3.61775	-20.3776	-18.1478	-9.40305		1.53772	-8.06119	-5.78718	-9.45692
10.7	-2.50164	-20.5235	-18.0746	-8.77808		1.67694	-7.87021	-6.09403	-8.73214
10.8	-1.13837	-20.5486	-17.775	-8.75137		1.0625	-7.69007	-6.72888	-8.59527
10.9	-1.47033	-20.6915	-17.7659	-9.63271		1.01976	-7.7797	-5.83823	-9.24186
11	-1.87167	-20.9705	-17.5221	-9.98294		0.868786	-8.25383	-5.96126	-8.47343
11.1	-1.66023	-20.5574	-17.8514	-9.84439		0.591967	-8.10187	-6.39571	-8.56608
11.2	-2.89881	-20.1541	-18.2049	-8.77077		-0.070245	-8.2095	-5.81087	-9.3028
11.3	-3.09585	-20.2192	-18.2855	-10.0389		-0.273607	-8.22981	-4.94718	-8.60366
11.4	-3.4077	-20.6765	-18.4037	-10.1804		-0.550002	-8.37254	-5.20036	-8.77777
11.5	-3.4286	-20.751	-18.6403	-9.63487		-0.249567	-8.51921	-5.76496	-9.26864
11.6	-3.19276	-21.1951	-18.449	-9.50276		0.358576	-8.76187	-6.46256	-9.00934
11.7	-3.42718	-21.4018	-18.4952	-9.61529		0.905133	-8.8917	-5.42541	-9.66145
11.8	-4.48306	-21.7118	-18.4508	-9.81816		0.98791	-9.0267	-5.78718	-9.11535
11.9	-4.49894	-21.2019	-18.3624	-10.3954		0.668924	-8.81996	-6.46067	-9.48049
12	-4.75043	-21.1986	-18.2059	-9.25242		0.784369	-8.62842	-6.08231	-9.67106
12.1	-4.30506	-20.8031	-18.4625	-10.4461		1.73623	-8.35703	-5.52979	-9.03831
12.2	-4.4782	-21.1105	-18.7952	-11.1659		1.69124	-8.59191	-5.9262	-9.20214
12.3	-3.79764	-21.288	-19.2011	-10.9712		1.44802	-8.44603	-5.9233	-8.94709
12.4	-4.20358	-21.2802	-19.1512	-10.3471		0.765564	-8.77731	-5.18138	-8.70825
12.5	-3.99948	-21.2931	-19.2509	-9.43205		0.319601	-8.49077	-4.92829	-9.275
12.6	-5.55409	-21.3591	-19.1907	-8.79215		-0.0900096	-8.27901	-5.63977	-8.79605
12.7	-5.54089	-21.0728	-18.8479	-9.33459		-0.632947	-8.1697	-5.96757	-9.30872
12.8	-4.93532	-21.0974	-18.6219	-8.67717		-1.08927	-7.79583	-5.53915	-8.85029
12.9	-3.63431	-20.9123	-18.8109	-9.97275		-0.662073	-7.32432	-5.70276	-8.85508
13	-2.56439	-21.1396	-18.9751	-11.4393		-0.813796	-7.37371	-6.3997	-9.43627
13.1	-1.99832	-21.057	-19.3219	-11.1262		-0.746669	-7.06719	-6.06043	-8.56665
13.2	-3.63251	-20.8198	-19.1845	-11.033		-0.721058	-7.04378	-5.42541	-8.73896
13.3	-4.56927	-20.7221	-19.1907	-10.6191		-0.418935	-6.96646	-5.78718	-9.16698
13.4	-6.70428	-20.7041	-18.9027	-10.2739		-0.550244	-6.9594	-6.09297	-8.77428
13.5	-6.6185	-20.7666	-18.8698	-10.5351		-0.528805	-7.35754	-6.22584	-9.25164
13.6	-6.39875	-21.0058	-18.8366	-9.85804		-0.415863	-7.39213	-6.51089	-8.51802
13.7	-5.16166	-21.2248	-18.7132	-9.98417		-0.221026	-7.65089	-6.77786	-8.77463
13.8	-4.23849	-21.2529	-18.5602	-9.63256		-0.174897	-8.21466	-6.63669	-9.55498
13.9	-5.02633	-21.1501	-18.8515	-8.67631		-0.642866	-8.21323	-6.42421	-8.73516
14	-4.82233	-21.096	-19.1034	-8.76806		-0.80477	-8.2095	-5.72526	-8.95632
14.1	-4.92252	-20.9116	-19.1382	-9.37983		-0.594968	-8.22981	-5.93555	-9.45444
14.2	-5.8779	-20.808	-18.9562	-9.95106		-0.0273227	-8.37254	-6.24963	-8.99418
14.3	-6.21964	-20.9753	-19.1318	-10.5808		-0.499664	-8.51921	-6.4924	-9.22606
14.4	-5.97842	-21.0818	-19.1925	-11.7834		-0.238019	-8.76187	-6.37542	-8.23757
14.5	-5.18813	-21.2066	-18.9596	-13.3784		0.23264	-8.8917	-6.13392	-8.50707
14.6	-5.48307	-21.4716	-18.7657	-12.5828		0.478505	-9.0267	-5.72526	-9.65538
14.7	-5.19738	-21.4534	-18.78	-12.0558		0.543777	-8.81996	-6.22584	-9.31217
14.8	-4.68148	-21.2761	-18.9603	-11.6572		0.690222	-8.62842	-6.51089	-9.65425
14.9	-4.76201	-21.05	-18.7616	-11.5848		0.86907	-8.35703	-6.77786	-10.4505
15	-4.00577	-21.0664	-18.7766	-11.1371		0.761021	-8.59191	-6.63669	-9.6274
15.1	-3.45982	-20.9653	-18.7721	-10.3796		-0.0302892	-8.44603	-6.42421	-9.45692
15.2	-2.26296	-20.9615	-18.8109	-11.2921		-0.157238	-8.77731	-5.72526	-8.73214
15.3	-1.78887	-20.8677	-18.9751	-11.9149		-0.437789	-8.49077	-6.03715	-8.59527
15.4	-3.51209	-20.8237	-19.3219	-10.8096		-0.433915	-8.27901	-5.81419	-9.24186
15.5	-2.63053	-20.2625	-19.1845	-10.4587		-0.461614	-8.1697	-6.44724	-8.47343
15.6	-3.43325	-19.9018	-19.1907	-11.2525		-0.165544	-7.79583	-7.23247	-8.56608
15.7	-4.07044	-20.5241	-18.9027	-11.3219		0.20382	-7.32432	-6.83914	-9.3028
15.8	-2.94864	-21.2058	-18.8698	-11.4766		0.425411	-7.37371	-6.00772	-8.60366
15.9	-2.89829	-21.4963	-18.8366	-10.2916		-0.276278	-7.06719	-6.13392	-8.77777
16	-3.49885	-22.0012	-18.7132	-10.0612		0.145361	-6.93419	-5.72526	-9.26864
16.1	-4.21496	-21.8569	-18.5602	-10.2937		0.572988	-7.06296	-6.22584	-9.00934
16.2	-6.25244	-21.4659	-18.8515	-10.6789		0.674766	-7.22036	-6.51089	-9.45744
16.3	-5.5249	-21.0983	-19.1034	-10.7357		0.0800478	-7.48896	-6.77786	-9.38475
16.4	-5.51253	-21.0622	-19.1382	-12.0715		0.226204	-7.60754	-7.00439	-9.82174
16.5	-6.35199	-21.6643	-18.9562	-12.7042		-0.0474503	-7.83294	-6.17908	-9.75846
16.6	-5.20692	-21.7394	-19.1318	-13.457		-0.569749	-8.05931	-5.04239	-9.54353
16.7	-5.75605	-21.7571	-19.1494	-12.9344		-1.29137	-8.00021	-5.09163	-9.04321
16.8	-5.92968	-21.8146	-18.9318	-12.0202		-0.769626	-7.85775	-4.78112	-9.04681
16.9	-5.82303	-21.3934	-18.9286	-11.3848		-0.632872	-8.13576	-5.50172	-8.90787
17	-6.97438	-21.2286	-18.9708	-10.915		-0.0254194	-7.75112	-6.5496	-8.60366
17.1	-6.26206	-21.3484	-19.1938	-9.77395		-0.0630919	-7.54508	-6.59401	-8.77777
17.2	-6.67924	-21.3054	-18.8185	-10.737		-0.228732	-7.45181	-6.37542	-9.26864
17.3	-6.356	-21.2919	-18.7646	-12.155		-0.136399	-7.77953	-6.13392	-9.00934
17.4	-4.5979	-21.2759	-18.91	-13.1618		-0.687807	-7.74731	-5.72526	-9.66145
17.5	-5.11794	-21.1979	-18.7132	-13.9516		-0.771995	-7.92359	-6.22584	-9.11535
17.6	-4.26284	-21.3364	-18.5602	-13.8684		-0.459	-8.05256	-6.51089	-9.48049
17.7	-3.92034	-21.2891	-18.8515	-13.5202		-0.680643	-8.06119	-6.77786	-9.67106
17.8	-5.00056	-21.4691	-19.1034	-12.4841		-0.582988	-7.87021	-6.63669	-9.03831
17.9	-5.97979	-21.5589	-19.1382	-11.0979		-0.387342	-7.69007	-6.42421	-9.20214
18	-7.19669	-21.4383	-18.9562	-11.0977		0.0420941	-7.7797	-5.72526	-8.94709
18.1	-7.16412	-21.2283	-19.1318	-10.6032		-0.13342	-8.25383	-6.03715	-8.70825
18.2	-6.48711	-21.1986	-19.1925	-10.9627		-0.419537	-8.10187	-5.81419	-9.275
18.3	-7.02948	-20.8031	-18.9596	-11.6743		-0.538963	-8.2095	-6.44724	-8.79605
18.4	-6.45554	-21.1105	-18.7657	-12.2493		-0.10735	-8.22981	-7.23247	-9.30872
18.5	-5.34069	-21.288	-18.78	-13.0741		-0.0348299	-8.37254	-6.83914	-8.85029
18.6	-5.51136	-21.2802	-18.9603	-12.7759		0.167198	-8.51921	-6.00772	-8.85508
18.7	-6.05848	-21.2931	-18.7616	-13.0679		0.0665007	-8.76187	-6.13392	-9.43627
18.8	-6.1244	-21.3591	-18.7766	-12.7911		-0.229079	-8.8917	-5.72526	-8.56665
18.9	-6.06604	-21.0728	-18.7721	-12.6538		-0.399558	-9.0267	-6.22584	-8.73896
19	-6.4309	-21.0974	-18.8109	-13.5861		-0.513654	-8.96516	-6.51089	-9.16698
19.1	-6.71382	-20.9123	-18.9751	-14.2394		0.216356	-8.66438	-6.77786	-8.77428
19.2	-6.9345	-21.1396	-19.3219	-13.8411		-0.0696439	-8.18371	-6.63669	-9.25164
19.3	-5.81234	-21.057	-19.1845	-14.4428		-0.00141516	-7.93318	-6.32261	-8.51802
19.4	-5.61809	-20.8198	-19.1907	-14.44		0.237499	-7.42354	-5.793	-8.77463
19.5	-6.30682	-20.7221	-18.9027	-13.7979		-0.0934362	-7.28873	-6.12424	-9.55498
19.6	-7.25312	-20.7041	-18.8698	-13.2767		0.296699	-6.93002	-6.51089	-8.73516
19.7	-7.54276	-20.7666	-18.8366	-13.0044		0.33185	-6.85788	-6.77786	-8.95632
19.8	-7.87396	-21.0058	-18.7132	-12.6378		0.548729	-7.35754	-6.63669	-9.45444
19.9	-7.89115	-21.2248	-18.5602	-12.3919		0.419926	-7.39213	-6.42421	-8.99418
20	-7.51877	-21.2529	-18.8515	-11.3984		0.288212	-7.65089	-5.72526	-9.22606
20.1	-6.25822	-21.1501	-19.1034	-10.5296		1.10675	-8.21466	-6.03715	-8.23757
20.2	-6.28976	-21.096	-19.1502	-10.6198		1.53772	-8.21323	-5.81419	-8.50707
20.3	-7.00668	-20.9116	-19.0342	-10.8228		1.67694	-8.2095	-6.44724	-9.65538
20.4	-7.84492	-20.808	-19.0225	-11.4248		1.0625	-8.22981	-7.23247	-9.31217
20.5	-8.01791	-20.9753	-19.0366	-12.1572		1.01976	-8.37254	-6.83914	-9.65425
20.6	-7.16724	-21.0818	-18.7236	-12.5181		0.868786	-8.51921	-6.00772	-10.0362
20.7	-8.23951	-21.2066	-18.5305	-13.2959		0.591967	-8.76187	-6.13392	-9.954
20.8	-7.7611	-21.4716	-18.6081	-13.5334		-0.070245	-8.8917	-5.72526	-10.3592
20.9	-7.16274	-21.4534	-18.9231	-13.1033		-0.273607	-9.0267	-6.42877	-9.37424
21	-7.32654	-21.2761	-18.9751	-13.9547		-0.550002	-8.81996	-6.16449	-9.76723
21.1	-6.53774	-21.05	-19.3219	-14.3721		-0.249567	-8.62842	-6.304	-9.5458
21.2	-6.46638	-21.0664	-19.1845	-13.6177		0.358576	-8.35703	-7.30643	-8.99986
21.3	-6.85027	-20.9653	-19.1907	-13.1559		0.905133	-8.59191	-6.20525	-9.1562
21.4	-6.32422	-20.9615	-18.9027	-12.2595		0.98791	-8.44603	-5.49218	-8.56665
21.5	-7.70799	-20.8677	-18.8698	-12.6478		0.668924	-8.77731	-5.64295	-8.73896
21.6	-8.05212	-20.8237	-18.8366	-11.8855		0.784369	-8.49077	-5.30933	-9.16698
21.7	-7.43657	-20.2625	-18.7132	-11.919		1.73623	-8.27901	-5.2744	-8.77428
21.8	-6.15163	-19.9018	-18.5602	-11.9917		1.69124	-8.1697	-5.21972	-9.25164
21.9	-5.86145	-20.5241	-18.8515	-13.3145		1.44802	-7.79583	-5.76496	-8.51802
22	-6.34833	-21.2058	-19.1034	-13.5565		0.765564	-7.32432	-6.46256	-8.77463
22.1	-7.38008	-21.4963	-19.1382	-13.8806		0.319601	-7.37371	-5.42541	-9.55498
22.2	-7.91733	-22.0012	-18.9562	-13.6016		-0.0900096	-7.06719	-5.78718	-8.73516
22.3	-8.27338	-21.9021	-19.1318	-14.3576		-0.632947	-6.93419	-6.46067	-8.95632
22.4	-8.76472	-21.6082	-19.1494	-14.3393		-1.08927	-7.06296	-6.08231	-9.45444
22.5	-7.86631	-20.9792	-18.9318	-14.5866		-0.662073	-7.22036	-5.52979	-8.99418
22.6	-7.42253	-20.5741	-18.9286	-13.6375		-0.813796	-7.48896	-5.9262	-9.22606
22.7	-7.75315	-20.9313	-18.9708	-13.9324		-0.746669	-7.60754	-5.9233	-8.23757
22.8	-7.92681	-20.9526	-19.1938	-13.4071		-0.721058	-7.83294	-5.18138	-8.50707
22.9	-7.66148	-20.9674	-18.8185	-12.1879		-0.418935	-8.05931	-4.92829	-9.65538
23	-8.57317	-21.2579	-18.7646	-11.0036		-0.550244	-8.00021	-5.63977	-9.31217
23.1	-8.56096	-21.4716	-18.91	-11.3298		-0.528805	-7.85775	-5.96757	-9.65425
23.2	-9.11745	-21.4534	-18.7132	-12.0384		-0.415863	-8.13576	-5.53915	-10.4505
23.3	-9.20434	-21.2761	-18.5602	-11.838		-0.221026	-7.75112	-5.70276	-9.6274
23.4	-9.52881	-21.05	-18.8515	-11.0994		-0.174897	-7.54508	-6.3997	-9.45692
23.5	-8.95312	-21.0664	-19.1034	-10.8762		-0.642866	-7.45181	-6.06043	-8.73214
23.6	-8.58208	-20.9653	-19.1382	-11.3437		-0.80477	-7.77953	-5.42541	-8.59527
23.7	-7.53377	-20.9615	-18.9945	-11.1045		-0.594968	-7.74731	-5.78718	-9.24186
23.8	-8.00884	-20.8677	-19.1426	-10.5169		-0.0273227	-7.92359	-6.09403	-8.47343
23.9	-7.93318	-20.8237	-19.0929	-10.585		-0.499664	-8.05256	-6.72888	-8.56608
24	-8.06806	-20.2625	-18.7971	-10.8404		-0.238019	-8.06119	-5.83823	-9.3028
24.1	-7.84889	-19.9018	-18.4979	-11.2319		0.23264	-7.87021	-5.96126	-8.60366
24.2	-7.60484	-20.5241	-18.6752	-11.4448		0.478505	-7.69007	-6.39571	-8.77777
24.3	-7.57567	-21.2058	-18.8574	-12.8803		0.543777	-7.7797	-5.81087	-9.26864
24.4	-7.1869	-21.4963	-18.813	-13.5217		0.690222	-8.25383	-4.94718	-9.00934
24.5	-6.92904	-22.0012	-18.9751	-14.3175		0.86907	-8.10187	-5.20036	-9.66145
24.6	-6.73405	-21.8569	-19.3219	-13.7606		0.761021	-8.2095	-5.76496	-9.11535
24.7	-7.26749	-21.4659	-19.1845	-14.318		-0.0302892	-8.22981	-6.46256	-9.48049
24.8	-7.54755	-21.0983	-19.1907	-14.6147		-0.157238	-8.37254	-5.42541	-9.67106
24.9	-7.26043	-21.0622	-18.9027	-15.1515		-0.437789	-8.51921	-5.78718	-9.03831
25	-6.77805	-21.6643	-18.8698	-14.6583		-0.433915	-8.76187	-6.46067	-9.20214
25.1	-6.67005	-21.7394	-18.8366	-14.8653		-0.461614	-8.8917	-6.08231	-8.94709
25.2	-6.27663	-21.7571	-18.7132	-13.5328		-0.165544	-9.0267	-5.52979	-8.70825
25.3	-6.8356	-21.8146	-18.5602	-13.2726		0.20382	-8.88469	-5.9262	-9.275
25.4	-7.82949	-21.3934	-18.8515	-12.7193		0.425411	-8.5666	-5.9233	-8.79605
25.5	-8.86984	-21.2286	-19.1034	-12.8885		-0.276278	-8.45911	-5.18138	-9.30872
25.6	-9.15381	-21.3484	-19.1502	-12.5925		0.145361	-8.31321	-4.92829	-8.85029
25.7	-9.13827	-21.3054	-19.0342	-13.8165		0.572988	-8.01269	-5.63977	-8.85508
25.8	-9.03914	-21.2919	-19.0225	-13.9297		0.674766	-8.13449	-5.96757	-9.43627
25.9	-9.61926	-21.2759	-19.0366	-13.8575		0.0800478	-7.71354	-5.53915	-8.56665
26	-9.001	-21.1979	-18.7236	-13.8479		0.226204	-7.39698	-5.70276	-8.73896
26.1	-9.39403	-21.3364	-18.5305	-14.0454		-0.0474503	-7.37371	-6.3997	-9.16698
26.2	-10.325	-21.2891	-18.6081	-13.3112		-0.569749	-7.06719	-6.06043	-8.77428
26.3	-9.59324	-21.4691	-18.9231	-12.9596		-1.29137	-6.93419	-5.42541	-9.25164
26.4	-8.56533	-21.5589	-18.9751	-12.604		-0.769626	-7.06296	-5.78718	-8.51802
26.5	-8.95203	-21.4383	-19.3219	-14.1557		-0.632872	-7.22036	-6.33178	-8.77463
26.6	-9.4978	-21.2283	-19.1845	-14.1904		-0.0254194	-7.48896	-5.92943	-9.55498
26.7	-9.91744	-21.1986	-19.1907	-14.4867		-0.0630919	-7.60754	-5.92836	-8.73516
26.8	-9.10503	-20.8031	-18.9027	-15.331		-0.228732	-7.83294	-6.70114	-8.95632
26.9	-9.34557	-21.1105	-18.8698	-15.9944		-0.136399	-8.05931	-6.89951	-9.45444
27	-9.72155	-21.288	-18.8366	-14.4849		-0.687807	-8.00021	-6.15092	-8.99418
27.1	-8.63277	-21.2802	-18.7132	-13.6296		-0.771995	-7.85775	-5.80363	-9.22606
27.2	-8.63516	-21.2931	-18.5602	-12.4021		-0.459	-8.13576	-5.86247	-8.23757
27.3	-9.25883	-21.3591	-18.8515	-11.8903		-0.680643	-7.75112	-6.32745	-8.50707
27.4	-8.8432	-21.0728	-19.1034	-11.0115		-0.582988	-7.54508	-6.07546	-9.65538
27.5	-8.70412	-21.0974	-19.1074	-10.5504		-0.387342	-7.45181	-6.7327	-9.31217
27.6	-9.07314	-20.8339	-18.9601	-11.8881		0.0420941	-7.77953	-7.49374	-9.65425
27.7	-9.20634	-21.0747	-19.1141	-13.2551		-0.13342	-7.74731	-7.02783	-10.4505
27.8	-9.4685	-21.2504	-19.3994	-12.6495		-0.419537	-7.92359	-6.07546	-9.6274
27.9	-9.4522	-21.1764	-19.2681	-13.4692		-0.538963	-7.85268	-6.03231	-9.45692
28	-9.72155	-21.4707	-18.9133	-13.9821		-0.10735	-8.30253	-6.09297	-8.73214
28.1	-9.87808	-21.4801	-19.0838	-13.1996		-0.0348299	-8.04667	-6.08231	-8.59527
28.2	-8.54305	-21.2173	-19.0905	-12.0423		0.167198	-8.11544	-5.52979	-9.24186
28.3	-8.27602	-21.068	-18.7743	-10.5694		0.0665007	-8.37157	-5.9262	-8.47343
28.4	-8.19206	-21.0664	-18.6999	-12.2149		-0.229079	-8.52352	-5.9233	-8.56608
28.5	-7.73635	-20.9653	-18.9113	-13.4038		-0.399558	-8.48869	-5.38736	-9.3028
28.6	-8.3339	-20.9615	-19.2028	-13.5292		-0.513654	-8.40153	-4.65376	-8.60366
28.7	-8.77984	-20.8677	-19.1404	-14.9301		0.216356	-8.01269	-5.11821	-8.77777
28.8	-9.38793	-20.8237	-19.1356	-14.9764		-0.0696439	-8.13449	-5.97527	-9.26864
28.9	-10.4787	-20.2625	-19.1231	-13.9936		-0.00141516	-7.71354	-5.89421	-9.00934
29	-9.93225	-19.9018	-18.8292	-13.009		0.237499	-7.39698	-5.61549	-9.45744
29.1	-10.2123	-20.5241	-18.5322	-12.7075		-0.0934362	-7.37371	-6.1036	-9.38475
29.2	-9.32037	-21.2058	-18.5719	-13.038		0.296699	-7.06719	-6.33178	-9.82174
29.3	-8.94749	-21.4963	-18.595	-13.387		0.33185	-6.93419	-6.08231	-9.75846
29.4	-8.87768	-22.0012	-18.603	-13.821		0.548729	-7.06296	-5.52979	-9.54353
29.5	-7.96962	-21.9021	-18.6136	-14.5069		0.419926	-7.22036	-5.9262	-9.04321
29.6	-9.37411	-21.6082	-19.049	-13.4777		0.288212	-7.67319	-5.9233	-9.04681
29.7	-10.0963	-20.9792	-19.0222	-13.3612		1.10675	-7.68146	-5.28575	-8.90787
29.8	-10.6571	-20.5741	-19.2325	-13.4608		1.53772	-7.49026	-5.0892	-8.60366
29.9	-11.3804	-20.9313	-19.5251	-14.5681		1.67694	-7.30358	-5.16337	-8.77777
30	-10.1601	-20.9526	-19.5488	-14.5719		1.0625	-6.92714	-5.11822	-9.26864
30.1	-10.3796	-20.9674	-19.2892	-14.8546		1.01976	-6.23411	-5.18899	-9.00934
30.2	-10.1546	-21.2579	-19.1533	-15.5255		0.868786	-5.84296	-5.70074	-9.66145
30.3	-9.6375	-21.4716	-19.2206	-15.4061		0.591967	-5.50257	-6.05199	-9.11535
30.4	-11.1864	-21.4534	-19.2853	-14.3808		-0.070245	-5.34114	-5.63139	-9.48049
30.5	-11.3505	-21.2761	-18.9133	-13.8297		-0.273607	-4.86208	-6.36963	-9.67106
30.6	-11.6788	-21.05	-19.0838	-13.3748		-0.550002	-4.64345	-5.86446	-9.03831
30.7	-11.0854	-21.0664	-19.0905	-13.597		-0.249567	-4.21864	-5.03763	-9.20214
30.8	-10.6521	-20.9653	-18.7743	-12.9734		0.358576	-3.87214	-4.71642	-8.94709
30.9	-10.4611	-20.9615	-18.6999	-11.7548		0.905133	-3.46504	-4.73057	-8.70825
31	-10.067	-20.8677	-18.9113	-11.3019		0.98791	-3.40738	-4.69004	-9.275
31.1	-9.74727	-20.8237	-19.2028	-11.2322		0.668924	-3.43767	-5.41248	-8.79605
31.2	-9.87245	-20.2625	-19.1404	-11.1649		0.784369	-3.3348	-4.87944	-9.30872
31.3	-9.02076	-19.9018	-19.1356	-11.6814		1.73623	-3.01535	-5.53648	-8.85029
31.4	-9.32973	-20.5241	-19.1231	-11.5427		1.69124	-2.72866	-4.94917	-8.85508
31.5	-9.49216	-21.2058	-18.8292	-11.664		1.44802	-2.54856	-4.41836	-9.43627
31.6	-10.1247	-21.4963	-18.5268	-12.3836		0.765564	-2.16779	-4.43245	-8.56665
31.7	-9.45711	-22.0012	-18.4379	-12.08		0.319601	-2.20722	-3.89269	-8.73896
31.8	-9.26979	-21.8569	-18.7647	-13.222		-0.0900096	-1.98216	-3.67678	-9.16698
31.9	-9.2046	-21.4659	-18.9273	-14.6785		-0.632947	-1.71359	-4.90781	-8.77428
32	-9.22571	-21.0983	-18.815	-14.9538		-1.08927	-1.43223	-4.40698	-9.25164
32.1	-8.85963	-21.0622	-18.9922	-15.1235		-0.662073	-1.19746	-4.59084	-8.51802
32.2	-9.57712	-21.6643	-19.0055	-14.0773		-0.813796	-1.09784	-5.9732	-8.77463
32.3	-9.46788	-21.7394	-19.1825	-13.3808		-0.746669	-1.64021	-5.22919	-9.55498
32.4	-8.44131	-21.4563	-19.1288	-13.6866		-0.721058	-1.75209	-5.00731	-8.73516
32.5	-7.52815	-22.0714	-19.0213	-13.3632		-0.418935	-2.09315	-4.95523	-8.95632
32.6	-6.60474	-22.0196	-19.1291	-13.6386		-0.550244	-1.55797	-4.73057	-9.45444
32.7	-7.0438	-21.7761	-19.1002	-14.2116		-0.528805	-1.49094	-4.69004	-8.99418
32.8	-7.69823	-21.9335	-18.9521	-13.7854		-0.415863	-1.04136	-5.41248	-9.22606
32.9	-8.367	-21.7059	-19.1073	-13.7661		-0.221026	-0.887466	-4.87944	-8.23757
33	-9.47572	-21.3321	-19.2297	-13.4978		-0.174897	-0.915048	-5.53648	-8.78796
33.1	-9.53918	-21.1507	-19.2662	-13.0278		-0.642866	-1.16708	-4.94917	-9.13525
33.2	-10.1406	-21.0622	-19.3052	-12.2918		-0.80477	-1.23998	-4.41836	-9.20862
33.3	-10.134	-21.6643	-18.9413	-12.0722		-0.594968	-1.42724	-4.43245	-9.41528
33.4	-10.356	-21.7394	-18.9451	-11.1451		-0.0273227	-1.1593	-3.89269	-9.95965
33.5	-10.5175	-21.4563	-18.6713	-11.8928		-0.499664	-1.42211	-3.53957	-9.74163
33.6	-10.4516	-22.0714	-18.6075	-11.8556		-0.238019	-0.990995	-5.35123	-9.31165
33.7	-10.3211	-22.0196	-18.7051	-12.2692		0.23264	-0.726455	-4.34813	-9.01735
33.8	-9.72862	-21.7761	-18.4676	-11.7087		0.478505	-0.665278	-4.60446	-8.80628
33.9	-8.59519	-21.9335	-18.0687	-11.9253		0.543777	-0.776336	-5.22996	-8.22985
34	-8.70269	-21.7059	-17.8714	-12.0899		0.690222	-0.92487	-4.54302	-8.40866
34.1	-8.18125	-21.3321	-17.2188	-12.5926		0.86907	-1.22261	-4.17583	-7.43981
34.2	-8.59526	-21.1507	-17.0194	-12.3899		0.761021	-1.26188	-4.44213	-7.32539
34.3	-8.54197	-21.0622	-16.5522	-13.7312		-0.0302892	-1.59365	-3.90462	-6.56195
34.4	-8.96747	-21.6643	-16.2391	-14.4638		-0.157238	-1.40534	-5.0191	-5.59289
34.5	-9.28849	-21.7394	-15.9059	-13.9805		-0.437789	-0.969064	-4.01274	-5.76879
34.6	-9.8341	-21.7571	-15.2149	-13.0632		-0.433915	-0.686581	-4.15756	-4.5349
34.7	-9.79892	-21.8146	-14.9077	-13.8478		-0.461614	-0.419596	-4.62	-4.20802
34.8	-10.3232	-21.3934	-14.6143	-13.4428		-0.165544	-0.530635	-4.23229	-4.47218
34.9	-10.4086	-21.2286	-13.9851	-13.3928		0.20382	-0.655343	-4.3162	-3.4787
35	-10.7459	-21.3484	-13.7276	-13.1978		0.425411	-0.480627	-5.4196	-3.73262
35.1	-10.0266	-21.3054	-13.3544	-13.2535		-0.276278	-0.448129	-3.91004	-2.84831
35.2	-9.0273	-21.2919	-12.9912	-13.0109		0.145361	-0.244043	-3.70077	-2.53153
35.3	-8.59007	-21.2759	-12.5684	-12.4982		0.572988	-0.356567	-3.02134	-2.84559
35.4	-9.36723	-21.1979	-12.0595	-13.2627		0.674766	-0.38522	-2.1401	-2.00541
35.5	-8.9917	-21.2658	-12.1038	-14.0662		0.0800478	-0.341221	-1.37052	-2.01236
35.6	-9.47733	-21.5233	-11.8328	-13.3275		0.226204	-0.524215	-1.27855	-2.68293
35.7	-9.20828	-21.7426	-11.1344	-13.7518		-0.0474503	-0.43264	-1.45924	-1.83255
35.8	-8.79805	-21.4885	-10.4488	-13.405		-0.569749	-0.331742	-2.34802	-2.58398
35.9	-8.25802	-20.6252	-9.59697	-12.4872		-1.29137	-0.0869908	-2.41897	-1.83052
36	-8.92128	-19.8519	-9.25553	-12.1234		-0.769626	-0.117363	-2.7749	-1.87943
36.1	-9.90439	-19.1517	-9.0852	-13.0264		-0.632872	-0.634434	-3.81586	-2.20861
36.2	-11.056	-18.5353	-9.01509	-13.3631		-0.0254194	-0.673732	-3.03626	-1.24474
36.3	-11.4178	-18.0589	-9.16659	-14.0515		-0.0630919	-0.650482	-2.45881	-1.4535
36.4	-11.7209	-18.3122	-8.99313	-14.0704		-0.228732	-0.633561	-2.73162	-1.76025
36.5	-11.6568	-18.6435	-8.64887	-14.1769		-0.136399	-0.55461	-1.51236	-0.623656
36.6	-10.8405	-18.328	-7.97207	-13.441		-0.687807	-0.486952	-1.14271	-0.8031
36.7	-10.7585	-17.9135	-7.49885	-13.9454		-0.771995	-0.0276139	-1.78532	-0.532175
36.8	-11.3307	-17.6079	-7.57724	-15.115		-0.459	0.270674	-1.31008	-0.535718
36.9	-10.601	-17.4718	-7.61254	-16.1739		-0.680643	0.541451	-1.73682	-1.07243
37	-10.1243	-17.3925	-7.41004	-15.9534		-0.582988	0.784564	-2.07028	-0.359057
37.1	-10.1944	-17.2549	-7.44075	-15.7598		-0.387342	0.933586	-1.21972	-0.817258
37.2	-9.97543	-17.1192	-6.91881	-15.1478		0.0420941	0.797771	-0.783751	-1.37895
37.3	-10.2547	-17.2385	-6.1669	-14.7448		-0.13342	0.772572	-0.548998	-0.883152
37.4	-9.04658	-16.6857	-5.70642	-12.8934		-0.419537	0.67029	-0.00487475	-1.30609
37.5	-10.0802	-16.2115	-5.46572	-13.0513		-0.538963	0.789922	-0.855542	-1.03425
37.6	-10.3061	-15.5828	-5.21915	-12.3303		-0.10735	0.718159	-1.33898	-0.827362
37.7	-9.92051	-15.3773	-5.14588	-12.2396		-0.0348299	0.796524	-1.30408	-1.2205
37.8	-9.92916	-15.1947	-5.19262	-12.9488		0.167198	0.748967	-2.0596	-0.0521001
37.9	-10.9336	-15.1157	-5.54964	-13.625		0.0665007	0.619175	-0.103027	-0.103149
38	-10.9533	-14.5875	-5.28856	-13.6581		-0.229079	0.408999	0.361872	-0.512335
38.1	-10.3915	-14.4541	-5.02108	-13.8554		-0.399558	0.478998	-1.0932	-0.075651
38.2	-9.54431	-14.1065	-5.32502	-12.8238		-0.513654	0.32103	-0.739524	-0.728517
38.3	-9.80083	-13.9301	-5.04918	-13.2672		0.216356	0.32912	-1.78649	0.250238
38.4	-9.16826	-13.8073	-4.88499	-13.003		-0.0696439	0.28211	-3.02747	-0.00720024
38.5	-8.96263	-14.0243	-4.68257	-13.1063		-0.00141516	0.41505	-1.81968	-0.743128
38.6	-8.52105	-14.1655	-4.60555	-13.6088		0.237499	0.383018	-1.65909	0.0243636
38.7	-8.46733	-14.2133	-4.51409	-13.7668		-0.0934362	0.0540522	-1.40376	-0.470566
38.8	-7.94887	-13.9021	-4.14709	-13.2831		0.296699	-0.101721	-0.753771	-0.83568
38.9	-8.60269	-13.3046	-4.0415	-13.1318		0.33185	-0.00848888	-0.843586	-0.277012
39	-8.66879	-12.7473	-3.92174	-12.528		0.548729	0.0732651	-0.283581	-0.701427
39.1	-8.39974	-12.2061	-3.8274	-12.2737		0.419926	0.295069	0.0743914	0.666281
39.2	-8.48881	-11.8927	-4.06373	-11.9383		0.288212	-0.165961	-0.789597	0.547545
39.3	-9.29473	-11.4341	-3.64851	-11.9247		1.10675	0.0731674	0.558478	-0.0506407
39.4	-9.26203	-11.1722	-3.71145	-11.7063		1.53772	-0.705129	0.191069	0.615844
39.5	-8.92987	-10.9587	-3.5826	-11.8039		1.67694	-0.515631	-1.7821	0.205731
39.6	-8.67105	-11.2106	-3.26244	-12.8681		1.0625	-1.61201	-0.817909	-0.228336
39.7	-9.0624	-11.2322	-3.00031	-13.6728		1.01976	0.054368	-0.745868	0.0542887
39.8	-8.11638	-11.4092	-2.76854	-14.1286		0.868786	0.697309	-1.24197	-0.556605
39.9	-7.54219	-11.1671	-2.87875	-13.6765		0.591967	-0.190777	-0.764636	0.40073
40	-7.51085	-11.4317	-3.19421	-12.5707		-0.070245	-0.712649	-1.48961	0.215814
40.1	-7.96008	-10.8145	-3.10476	-13.2454		-0.273607	-1.84513	-1.39353	-0.366358
40.2	-7.64228	-10.2843	-3.24571	-12.2444		-0.550002	0.344631	-1.13855	-0.0318803
40.3	-8.03131	-9.68746	-3.14558	-12.118		-0.249567	0.00699339	-1.43594	-0.290836
40.4	-8.32681	-9.96289	-2.91458	-11.7608		0.358576	0.103998	-0.678623	-0.722876
40.5	-8.83399	-9.64799	-2.63313	-10.8808		0.905133	-0.225368	0.0385723	-0.17289
40.6	-9.44764	-9.72478	-2.44522	-9.94276		0.98791	-1.10443	0.448834	-0.515787
40.7	-9.76329	-9.25876	-2.43279	-9.17529		0.668924	-0.0433891	1.55485	0.477119
40.8	-10.2309	-9.64093	-2.53085	-8.82305		0.784369	-1.26986	2.16949	0.479216
40.9	-10.6637	-9.23082	-2.58193	-9.07395		1.73623	-0.754008	1.64425	-0.14358
41	-10.0769	-9.00596	-2.21061	-9.58967		1.69124	0.17694	1.32737	0.475501
41.1	-9.62814	-8.98188	-1.99154	-9.68262		1.44802	-0.454721	1.08144	0.473477
41.2	-8.87427	-9.13788	-1.88728	-10.084		0.765564	-0.742728	-0.359	0.036836
41.3	-8.74826	-8.74514	-1.9323	-10.16		0.319601	0.109262	0.00338221	0.805878
41.4	-8.62535	-9.02759	-2.14613	-9.96976		-0.0900096	0.900343	0.145662	0.387563
41.5	-8.53045	-8.76584	-2.11926	-9.56207		-0.632947	1.22369	-0.00780625	1.18945
41.6	-8.62043	-8.53435	-2.3514	-10.2632		-1.08927	0.912374	0.694533	1.24556
41.7	-8.90693	-8.07305	-2.31777	-9.10557		-0.662073	0.643166	0.112603	0.433022
41.8	-9.19385	-7.529	-2.10367	-9.31741		-0.813796	0.264922	-0.868187	1.16011
41.9	-8.91579	-7.65904	-2.01708	-8.72964		-0.746669	1.00261	-0.00637946	0.954491
42	-8.16642	-7.76224	-1.99895	-9.4442		-0.721058	0.742427	0.0330142	0.385303
42.1	-8.99677	-7.74493	-1.89284	-9.54582		-0.418935	1.17933	-0.114058	0.262508
42.2	-9.72243	-7.89826	-1.83447	-8.41534		-0.550244	0.25289	0.591902	0.251297
42.3	-9.44079	-7.91626	-1.73439	-7.93642		-0.528805	0.971781	0.00902282	0.372857
42.4	-8.79779	-7.64799	-2.01669	-8.42		-0.415863	0.133326	-0.19921	0.613169
42.5	-8.0863	-7.55207	-1.83848	-7.21884		-0.221026	1.26204	-0.324688	0.0754394
42.6	-7.53799	-7.04073	-1.7723	-7.81822		-0.174897	0.351399	-1.21973	0.0321896
42.7	-6.24833	-6.88662	-1.65535	-7.80482		-0.642866	-0.254695	-0.0647976	0.415378
42.8	-5.12221	-6.26951	-1.66946	-7.86735		-0.80477	0.304025	-0.199883	0.473477
42.9	-6.19192	-5.82775	-1.30409	-8.31988		-0.594968	0.816873	-1.05111	0.036836
43	-6.80487	-5.38379	-1.11179	-7.29941		-0.0273227	0.0603838	-0.143356	0.805878
43.1	-6.558	-5.3261	-1.16258	-8.31555		-0.499664	0.456676	-0.41361	0.387563
43.2	-7.30465	-5.18296	-1.42856	-7.27157		-0.238019	0.456676	-0.687322	1.36376
43.3	-8.14395	-5.50183	-1.45298	-7.27275		0.23264	-0.219352	0.312693	0.960819
43.4	-8.71261	-5.78309	-1.22977	-6.6858		0.478505	-0.375763	0.345107	0.651718
43.5	-9.03459	-5.87038	-1.33849	-5.47609		0.543777	-0.284022	0.655788	0.534238
43.6	-8.02853	-5.84217	-1.39681	-5.24518		0.690222	0.764235	0.405216	0.412951
43.7	-7.45442	-5.93613	-1.66079	-6.86735		0.86907		-0.30096	-0.372628
43.8	-7.03684	-5.60214	-1.61368	-8.1715		0.761021		-0.712829	-0.687771
43.9	-7.08884	-5.62111	-1.59231	-9.83712		-0.0302892		-0.90032	-0.599488
44	-6.7008	-5.18897	-1.53847	-9.08875		-0.157238		-1.13703	-0.103149
44.1	-7.3004	-5.29327	-1.44157	-9.44067		-0.437789		-0.616464	-0.512335
44.2	-7.43174	-5.37461	-1.11021	-7.53701		-0.433915		0.376494	-0.075651
44.3	-7.20008	-5.25722	-1.11535	-6.33249		-0.461614		-0.157555	-0.728517
44.4	-7.4759	-5.12669	-1.05416	-5.1872		-0.165544		0.545158	0.250238
44.5	-7.33798	-4.59749	-1.23674	-5.58712		0.20382		-0.325997	-0.00720024
44.6	-7.09364	-4.30862	-0.950749	-5.93557		0.425411		-0.281561	-0.743128
44.7	-7.117	-4.67418	-0.852156	-6.20891		-0.276278		-0.463437	0.0243636
44.8	-5.89317	-4.64591	-0.543174	-6.04742		0.145361		-0.0882834	-0.470566
44.9	-5.69735	-4.61909	-0.621754	-6.80203		0.572988		-0.0149056	-0.83568
45	-5.38296	-4.47226	-0.637359	-7.63618		0.674766		0.252911	-0.277012
45.1	-5.92389	-4.19766	-0.734718	-8.14442		0.0800478		-0.205998	-0.701427
45.2	-7.37684	-3.82905	-0.785312	-7.29369		0.226204		-0.136117	0.666281
45.3	-6.69694	-3.58525	-0.720497	-6.40925		-0.0474503		-1.45262	0.547545
45.4	-6.34825	-3.33027	-0.755665	-5.18638		-0.569749		-0.473737	-0.0506407
45.5	-6.17704	-3.42038	-0.845734	-5.26492		-1.29137		-0.816732	0.615844
45.6	-6.28611	-3.31506	-0.844841	-4.52824		-0.769626		-1.33967	0.205731
45.7	-6.57113	-3.01116	-1.14218	-4.67602		-0.632872		-1.13833	-0.228336
45.8	-8.28574	-3.06608	-1.3299	-4.77586		-0.0254194		-0.843586	0.0542887
45.9	-9.50437	-3.16222	-1.06477	-4.63717		-0.0630919		-0.283581	-0.556605
46	-10.0871	-3.41803	-1.02476	-3.86053		-0.228732		0.0743914	0.40073
46.1	-9.29259	-3.35209	-0.665681	-3.50127		-0.136399		-0.789597	0.215814
46.2	-9.25064	-3.10986	-0.532426	-4.20005		-0.687807		0.558478	-0.366358
46.3	-8.96194	-3.06942	-0.708615	-4.767		-0.771995		0.191069	-0.0318803
46.4	-8.96209	-2.84302	-0.75126	-4.53559		-0.459		-1.7821	-0.290836
46.5	-8.29879	-2.83667	-0.91596	-4.92852		-0.680643		-0.817909	-0.722876
46.6	-8.21775	-3.15504	-0.843134	-4.21705		-0.582988		-0.745868	-0.17289
46.7	-8.64077	-3.61998	-0.402018	-4.55615		-0.387342		-1.24197	-0.515787
46.8	-9.59296	-3.79823	-0.378147	-4.51834		0.0420941		-0.764636	0.477119
46.9	-9.35379	-3.709	-0.105405	-4.17728		-0.13342		-1.48961	0.479216
47	-10.0957	-3.82915	-0.0866744	-4.03832		-0.419537		-1.39353	-0.14358
47.1	-9.95062	-3.50143	-0.479089	-2.7289		-0.538963		-1.13855	0.475501
47.2	-9.49849	-3.22602	-0.366276	-1.9161		-0.10735		-1.43594	0.473477
47.3	-8.49677	-2.88597	-0.59908	-1.28321		-0.0348299		-0.678623	0.036836
47.4	-7.45381	-2.39183	-0.912094	-0.168985		0.167198		0.0385723	0.805878
47.5	-7.26248	-2.33644	-0.796975	-0.964532		0.0665007		0.448834	0.387563
47.6	-7.6092	-1.88096	-0.665553	-1.77726		-0.229079		1.55485	1.18945
47.7	-6.99333	-1.89579	-0.433398	-1.81999		-0.399558		2.16949	1.24556
47.8	-6.88876	-2.27925	-0.252839	-2.52648		-0.513654		1.64425	0.433022
47.9	-6.2794	-2.42501	-0.300492	-2.8817		0.216356		1.32737	1.16011
48	-6.95635	-2.66125	-0.0548665	-3.36632		-0.0696439		1.08144	0.954491
48.1	-7.9191	-2.47899	-0.283482	-3.34181		-0.00141516		-0.359	0.385303
48.2	-8.64094	-1.89387	-0.709792	-3.55351		0.237499		0.00338221	0.262508
48.3	-8.12182	-1.85047	-0.878831	-4.11219		-0.0934362		0.145662	0.251297
48.4	-7.64538	-1.41873	-0.961162	-3.84669		0.296699		-0.00780625	0.372857
48.5	-6.50087	-1.04642	-0.426777	-3.49124		0.33185		0.694533	0.613169
48.6	-5.71094	-1.23387	-0.313078	-4.24916		0.548729		0.112603	0.0754394
48.7	-4.55307	-1.76637	-0.0577403	-3.34654		0.419926		-0.868187	0.0321896
48.8	-5.28581	-1.91714	0.0622546	-2.77648		0.288212		-0.00637946	0.415378
48.9	-6.40468	-1.7913	-0.144069	-2.14943		1.10675		0.0330142	0.473477
49	-6.4156	-1.56669	-0.255944	-1.76367		1.53772		-0.114058	0.036836
49.1	-6.93011	-1.68396	-0.479539	-1.08259		1.67694		0.591902	0.805878
49.2	-7.27315	-1.6543	-0.424491	-0.33748		1.0625		0.00902282	0.387563
49.3	-7.57382	-1.28504	-0.0218808	-1.09699		1.01976		-0.19921	1.24739
49.4	-7.5385	-1.63978	-0.106581	-2.10464		0.868786		-0.324688	1.1493
49.5	-6.10444	-1.73315	-0.164473	-2.31182		0.591967		-1.21973	0.444424
49.6	-6.26686	-1.57719	-0.15709	-2.28946		-0.070245		-0.0647976	1.16721
49.7	-5.91226	-1.32561	-0.458601	-2.44921		-0.273607		-0.199883	0.79093
49.8	-5.03044	-1.20122	-0.28133	-2.16231		-0.550002		-1.05111	-0.166604
49.9	-5.85068	-1.38589	-0.0610499	-1.86841		-0.249567		-0.143356	0.0577403
50	-5.93763	-1.63703	0.0240762	-1.45466		0.358576		-0.41361	-0.724896
50.1	-6.3876	-1.75388	0.0709495	-1.43218		0.905133		-0.687322	0.177591
50.2	-5.32168	-2.09157	-0.0320069	-1.3609		0.98791		0.312693	0.206584
50.3	-4.81298	-1.68418	-0.131993	-2.16714		0.668924		0.345107	-0.19697
50.4	-5.05823	-1.74308	-0.0415935	-2.23519		0.784369		0.655788	0.724448
50.5	-5.18049	-1.67604	0.0298363	-2.29422		1.73623		0.405216	0.256772
50.6	-5.66105	-1.5925	-0.0271909	-1.46341		1.69124		-0.30096	-0.112075
50.7	-5.83661	-1.53044	0.11276	-1.28662		1.44802		-0.712829	-0.0319517
50.8	-5.49021	-1.33178	-0.178763	-1.53631		0.765564		-0.90032	-0.966052
50.9	-5.49099	-1.0204	-0.502607	-1.75701		0.319601		-1.13703	-0.157478
51	-5.95451	-0.886957	-0.547512	-1.62288		-0.0900096		-0.616464	-0.243071
51.1	-6.80284	-0.84743	-0.500313	-2.19787		-0.632947		0.376494	-0.656823
51.2	-6.56775	-1.24443	-0.330471	-2.01262		-1.08927		-0.157555	0.285621
51.3	-6.89847	-1.80476	-0.0218808	-1.19001		-0.662073		0.51486	-0.092885
51.4	-6.8438	-1.63308	-0.106581	-0.926955		-0.813796		-0.0599333	-0.269123
51.5	-5.67558	-1.69125	-0.164473	-0.555666		-0.746669		-0.918831	0.12739
51.6	-4.95265	-1.76322	-0.15709	-0.875721		-0.721058		-0.182094	-0.432172
51.7	-4.23606	-1.52425	-0.458601	-0.285255		-0.418935		0.232692	0.860629
51.8	-4.71564	-1.47791	-0.28133	-0.46471		-0.550244		-0.293916	0.764227
51.9	-4.97467	-1.59681	-0.0610499	-1.23256		-0.528805		0.832842	0.237441
52	-5.09098	-1.71453	0.0240762	-0.985918		-0.415863		-0.0688305	1.02719
52.1	-4.93432	-1.82042	0.0709495	-0.634535		-0.221026		-0.19921	0.499735
52.2	-4.20477	-1.19266	-0.0320069	-1.66865		-0.174897		-0.324688	0.504959
52.3	-4.04227	-0.931974	-0.131993	-1.04415		-0.642866		-1.21973	0.688637
52.4	-3.61817	-0.533593	-0.0415935	-1.58765		-0.80477		-0.0647976	-0.155982
52.5	-3.93322	-0.39861	0.0298363	-0.622149		-0.594968		-0.199883	0.628605
52.6	-4.0543	-0.263621	-0.0271909	-0.669778		-0.0273227		-1.05111	0.27441
52.7	-4.94296	-0.552293	0.11276	-0.44186		-0.499664		-0.143356	-0.288531
52.8	-6.96489	-0.943313	-0.178763	-0.0946654		-0.238019		-0.41361	-0.515473
52.9	-7.1334	-1.29774	-0.502607	0.632185		0.23264		-0.687322	-0.791219
53	-7.34839	-1.59058	-0.547512	0.705188		0.478505		0.312693	-0.601052
53.1	-7.86599	-1.7539	-0.500313	1.80577		0.543777		0.345107	-0.95693
53.2	-6.39254	-1.18376	-0.330471	1.21201		0.690222		0.655788	-0.678064
53.3	-6.31464	-1.23772	-0.0218808	1.13466		0.86907		0.405216	-0.196145
53.4	-4.8323	-0.967524	-0.106581	0.79147		0.761021		-0.30096	0.477119
53.5	-4.73008	-0.809755	-0.164473	0.54392		-0.0302892		-0.712829	0.479216
53.6	-4.9748	-0.949212	-0.15709	-0.572402		-0.157238		-0.90032	-0.14358
53.7	-5.02978	-1.18494	-0.458601	-1.10223		-0.437789		-1.13703	0.475501
53.8	-5.48359	-1.22671	-0.28133	-1.0363		-0.433915		-0.616464	0.473477
53.9	-6.23023	-0.864758	-0.0610499	-0.593329		-0.461614		0.376494	0.036836
54	-6.08761	-0.371124	0.0240762	-1.06405		-0.165544		-0.157555	0.805878
54.1	-5.80291	-0.293902	0.0709495	-1.35849		0.20382		0.347104	0.387563
54.2	-5.65052	-0.00906109	-0.0320069	-0.916989		0.425411		0.0351224	1.18945
54.3	-5.48473	-0.0185371	-0.131993	-0.188887		-0.276278		-0.414719	1.24556
54.4	-4.68708	-0.25697	-0.0415935	-0.761963		0.145361		0.108551	0.433022
54.5	-4.45353	-0.461148	-0.0380411	-1.3721		0.572988		0.312216	1.16011
54.6	-2.85743	-0.790843	-0.0529455	-1.06726		0.674766		0.177534	0.954491
54.7	-2.06146	-0.525739	0.250251	-0.730958		0.0800478		0.806497	0.385303
54.8	-1.46815	-1.00299	0.0334165	-1.41871		0.226204		-0.384989	0.262508
54.9	-1.40167	-1.22461	0.0777625	-1.81186		-0.0474503		-0.712829	0.251297
55	-2.76354	-1.0605	0.156709	-1.06481		-0.569749		-0.90032	0.372857
55.1	-4.22599	-0.66268	0.0485928	-1.43848		-1.29137		-1.13703	0.613169
55.2	-5.38333	-0.588395	-0.0347971	-2.14638		-0.769626		-0.616464	0.0754394
55.3	-5.6378	-0.5814	-0.0320069	-2.736		-0.632872		0.376494	0.0321896
55.4	-4.49902	-0.678017	-0.131993	-2.39513		-0.0254194		-0.157555	0.415378
55.5	-3.58525	-0.0879759	-0.0415935	-1.68009		-0.0630919		0.51486	0.473477
55.6	-2.97141	-0.12063	0.0298363	-2.00412		-0.228732		-0.0599333	0.036836
55.7	-3.53074	-0.1059	-0.0271909	-1.96057		-0.136399		-0.918831	0.805878
55.8	-3.58475	0.104127	0.11276	-1.25893		-0.687807		-0.182094	0.387563
55.9	-4.48005	0.468733	-0.178763	-1.38021		-0.771995		0.232692	1.24739
56	-5.18694	-0.123961	-0.502607	-1.11015		-0.459		-0.293916	1.1493
56.1	-4.86255	-0.640012	-0.547512	-0.774483		-0.680643		0.832842	0.444424
56.2	-5.58854	-0.992149	-0.500313	-0.50324		-0.582988		-0.0688305	1.16721
56.3	-5.94253	-0.955571	-0.330471	0.119485		-0.387342		-0.19921	0.79093
56.4	-5.99045	-1.07191	-0.0218808	0.558788		0.0420941		-0.324688	-0.166604
56.5	-5.95757	-1.23442	-0.106581	0.429411		-0.13342		-1.21973	0.0577403
56.6	-5.68518	-1.08763	-0.164473	0.68209		-0.419537		-0.0647976	-0.724896
56.7	-5.44497	-0.426915	-0.15709	0.371183		-0.538963		-0.199883	0.177591
56.8	-4.79769	-0.136764	-0.458601	0.756975		0.0938488		-1.05111	0.206584
56.9	-4.24609	0.323908	-0.28133	0.673699		-0.0301193		-0.143356	-0.19697
57	-4.72478	0.50113	-0.0610499	0.40956		0.0655216		-0.41361	0.724448
57.1	-4.57576	0.919448	0.0240762	0.609824		-0.0620276		-0.687322	0.256772
57.2	-3.97274	0.631282	0.0709495	-0.364383		-0.267653		0.312693	-0.112075
57.3	-3.41398	0.0944171	-0.0320069	-0.676069		-0.55895		0.345107	-0.0319517
57.4	-4.71368	-0.224151	-0.077555	-1.52262		-1.02703		0.655788	-0.966052
57.5	-4.99278	-0.49966	-0.0772323	-2.33966		-0.426973		0.405216	-0.157478
57.6	-4.41988	-0.630104	-0.212127	-1.64104		-0.419122		-0.30096	-0.243071
57.7	-4.39911	-0.549544	0.0138476	-1.96308		-0.166032		-0.712829	-0.656823
57.8	-4.51674	-0.574961	0.0270766	-1.76913		0.152606		-0.90032	0.285621
57.9	-4.37652	-0.0480968	-0.0875626	-1.16256		-0.173247		-1.13703	-0.092885
58	-4.02179	-0.303753	-0.0998111	-1.53806		-0.0668305		-0.616464	-0.269123
58.1	-4.40934	-0.514885	-0.0798114	0.00540013		-0.717096		0.0602397	0.12739
58.2	-5.91864	-0.620984	-0.0415935	-0.922525		-0.650165		0.333246	-0.432172
58.3	-5.9284	-0.66802	-0.0380411	-1.59824		-0.58889		0.309455	0.860629
58.4	-4.49616	-0.39977	-0.0529455	-1.55452		-0.680643		0.481882	0.764227
58.5	-4.02652	-0.032536	0.250251	-2.43401		-0.582988		0.692113	0.237441
58.6	-4.31125	0.253679	0.0334165	-2.23782		-0.387342		1.28821	1.02719
58.7	-3.37669	0.388685	0.0777625	-1.86532		0.0420941		1.90384	0.499735
58.8	-2.85781	-0.0501623	0.156709	-1.59412		-0.13342		1.74245	0.504959
58.9	-3.30771	-0.0946531	0.0485928	-0.190289		-0.403921		1.32737	0.688637
59	-2.9779	-0.225393	-0.0347971	-0.279355		-0.496502		1.08144	-0.155982
59.1	-2.13403	-0.48151	-0.0320069	-1.21808		-0.107853		-0.359	0.628605
59.2	-1.7115	-0.387125	-0.131993	-1.01571		0.207196		0.00338221	-0.0875947
59.3	-1.96113	-0.300964	-0.0415935	-1.43994		0.122277		0.145662	-0.0507185
59.4	-2.622	-0.484472	0.0298363	-1.15598		-0.422382		-0.00780625	0.0714329
59.5	-2.35426	-0.785079	-0.0271909	-0.993351		-0.55238		0.694533	0.240337
59.6	-2.48225	-0.925694	0.11276	-1.14582		-0.340478		0.112603	0.590934
59.7	-2.49033	-0.569888	-0.178763	-0.00794311		-0.717845		-0.868187	0.00388594
59.8	-3.08803	-0.60241	-0.502607	0.181015		-0.125158		-0.00637946	0.121649
59.9	-4.37958	-0.541425	-0.547512	-0.293491		-0.441695		-0.133618	0.585408
60	-5.28485	-0.2099	-0.500313	-0.308896		-0.743605		0.428126	0.036836
60.1	-6.44195	-0.341695	-0.330471	-0.126116		-0.045576		0.422049	0.805878
60.2	-6.65729	-0.295821	-0.0218808	0.200143		0.146945		-0.155648	0.387563
60.3	-6.01201	0.0451593	-0.106581	0.995685		0.832834			1.18945
60.4	-4.10822	0.112648	-0.164473	0.533206		0.660066			1.24556
60.5	-2.49507	0.274885	-0.15709	1.40091		0.288212			0.433022
60.6	-1.8506	0.0838594	-0.340245	0.998173		1.10675			1.16011
60.7	-1.41678	-0.178481	-0.386826	0.446643		1.53772			0.954491
60.8	-1.15748	-0.292441	-0.366553	-0.0135182		1.67694			0.385303
60.9	-2.46173	-0.461148	-0.0533893	0.643899		1.0625			0.262508
61	-3.42219	-0.790843	-0.118125	0.946232		1.01976			0.251297
61.1	-3.34702	-0.525739	-0.123946	0.610061		0.868786			0.372857
61.2	-2.62969	-1.00299	-0.25939	-0.970631		0.591967			0.613169
61.3	-2.92134	-1.22461	0.0159638	-1.36756		-0.070245			0.0754394
61.4	-3.07748	-1.0605	-0.0415935	-1.26472		-0.273607			0.0321896
61.5	-3.51692	-0.66268	-0.0380411	-1.83337		-0.550002			0.415378
61.6	-3.68648	-0.588395	-0.0529455	-1.17571		-0.249567			0.473477
61.7	-4.60912	-0.5814	0.250251	0.251568		0.358576			0.036836
61.8	-4.67795	-0.678017	0.0334165	0.835438		0.905133			0.805878
61.9	-2.77347	-0.0879759	0.0777625	1.18124		0.98791			0.387563
62	-1.99117	-0.12063	0.156709	0.884099		0.668924			1.36376
62.1	-1.26405	-0.1059	0.0485928	0.757795		0.784369			0.960819
62.2	-0.830926	0.104127	-0.0347971	1.41783		1.73623			0.651718
62.3	-1.63685	0.468733	-0.0320069	1.39399		1.69124			0.534238
62.4	-2.01986	-0.123961	-0.131993	1.23435		1.44802			0.412951
62.5	-2.37803	-0.640012	-0.0415935	0.858728		0.765564			-0.372628
62.6	-2.08109	-0.992149	0.0298363	0.736504		0.319601			-0.687771
62.7	-1.63333	-0.955571	-0.0271909	0.576801		-0.0900096			-0.599488
62.8	-1.99698	-1.07191	0.11276	0.0502202		-0.632947			-0.103149
62.9	-1.27443	-1.23442	-0.178763	-0.843653		-1.08927			-0.512335
63	-1.1467	-1.08763	-0.502607	-0.376048		-0.662073			-0.075651
63.1	-1.76361	-0.426915	-0.547512	0.557342		-0.813796			-0.728517
63.2	-2.06663	-0.136764	-0.500313	0.897271		-0.746669			0.250238
63.3	-2.6561	0.323908	-0.330471	0.533206		-0.721058			-0.00720024
63.4	-2.88951	0.50113	-0.0218808	1.40091		-0.418935			-0.743128
63.5	-2.81596	0.919448	-0.106581	0.998173		-0.550244			0.0243636
63.6	-3.0503	0.631282	-0.164473	0.446643		-0.528805			-0.470566
63.7	-2.59418	0.0944171	-0.15709	-0.0135182		-0.415863			-0.83568
63.8	-1.57966	-0.224151	-0.432009	0.643899		-0.221026			-0.277012
63.9	-0.844102	-0.49966	-0.195631	0.946232		-0.174897			-0.701427
64	-0.0370136	-0.630104	-0.287928	0.610061		-0.642866			0.666281
64.1	-0.706836	-0.549544	-0.119373	-0.970631		-0.80477			0.547545
64.2	-1.59701	-0.574961	-0.141455	-1.36756		-0.594968			-0.0506407
64.3	-2.04719	-0.0480968	-0.124414	-1.26472		-0.0273227			0.615844
64.4	-2.87433	-0.303753	-0.268454	-1.83337		-0.499664			0.205731
64.5	-3.1526	-0.514885	0.148192	-1.17571		-0.238019			-0.228336
64.6	-3.15535	-0.33588	-0.0271909	0.251568		0.23264			0.0542887
64.7	-2.39406	-0.803854	0.11276	0.835438		0.478505			-0.556605
64.8	-1.28203	-0.974654	-0.178763	1.18124		0.543777			0.40073
64.9	-1.43201	-1.02119	-0.502607	0.884099		0.690222			0.215814
65	-1.93243	-0.654443	-0.547512	0.757795		0.86907			-0.366358
65.1	-2.14841	-0.0743948	-0.500313	1.41783		0.761021			-0.0318803
65.2	-2.16064	-0.00786286	-0.273349	1.39399		-0.0302892			-0.290836
65.3	-1.94726	0.116372	-0.123651	1.23435		-0.157238			-0.722876
65.4	-2.17236	0.468733	-0.11509	1.00943		-0.437789			-0.503014
65.5	-2.55757	-0.123961	-0.0820572	0.271479		-0.433915			-0.32111
65.6	-2.59085	-0.640012	-0.508063	0.430362		-0.461614			0.806759
65.7	-3.04172	-0.992149	-0.669918	0.583134		-0.165544			1.36775
65.8	-2.56084	-0.955571	-0.515372	0.427038		0.20382
65.9	-2.50239	-1.07191	-0.375993	0.141445		0.425411
66	-2.2038	-1.23442	-0.0430876	-0.419248		-0.276278
66.1	-1.96115	-1.08763	0.0198833	-1.48022		0.145361
66.2	-2.01887	-0.426915	0.278512	-1.26472		0.572988
66.3	-2.69917	-0.136764		-1.83337		0.674766
66.4	-2.87505	0.323908		-1.17571		0.0800478
66.5	-4.15361	0.50113		0.251568		0.226204
66.6	-3.70798	0.919448		0.835438		-0.0474503
66.7	-3.48094	0.631282		1.18124		-0.569749
66.8	-3.24765	0.0944171		0.884099		-1.29137
66.9	-2.36874	-0.224151		0.757795		-0.769626
67	-1.77366	-0.418968		1.41783		-0.632872
67.1	-1.06703	-0.719759		1.39399		-0.290492
67.2	-0.725287	-0.674376		1.23435		-0.142981
67.3	-1.15453	-0.666453		0.858728		-0.0571065
67.4	-1.5911			0.736504		0.117555
67.5	-2.1737			0.576801		0.00366933
67.6	-1.75273			0.0502202		-0.382602
67.7	-1.55587			-0.843653		-0.228396
67.8	-2.51206			-0.376048		-0.255887
67.9	-3.05617			0.557342
68	-3.56972			0.897271
68.1	-3.71291			0.533206
68.2	-4.55122			1.40091
68.3	-3.89587			0.998173
68.4	-2.26549			0.446643
68.5	-0.996389			-0.0135182
68.6	-0.831881			0.246587
68.7	0.150868			0.758594
68.8	-0.578017			1.61635
68.9	-1.41622			1.38904
69	-2.92074			1.11959
69.1	-3.69495			-0.480325
69.2	-2.91036			-1.64367
69.3	-2.70433			-1.3123
69.4	-3.02763			-1.83337
69.5	-1.27686			-1.17571
69.6	-1.55505			0.251568
69.7	-1.49772			0.835438
69.8	-1.43531			1.18124
69.9	-2.11347			0.884099
70	-2.04553			0.757795
70.1	-3.09812			1.41783
70.2	-4.04039			1.39399
70.3	-3.91416			1.23435
70.4	-4.25308			1.00943
70.5	-3.98268			0.271479
70.6	-2.75468			0.430362
70.7	-1.55995			0.583134
70.8	-1.01671			0.427038
70.9	-1.13677			0.141445
71	-1.80668			-0.419248
71.1	-3.00601			-1.48022
71.2	-3.73711			-1.26472
71.3	-4.79944			-1.83337
71.4	-3.89587			-1.17571
71.5	-2.26549			0.251568
71.6	-0.996389			0.835438
71.7	-0.831881			1.18124
71.8	0.150868			0.884099
71.9	-0.578017			0.757795
72	-1.41622			1.41783
72.1	-2.92074			1.39399
72.2	-3.69495			1.03918
72.3	-2.91036			1.09196
72.4	-2.70433			1.06297
72.5	-3.02763			1.20823
72.6	-1.27686			0.247531
72.7	-1.55505			-1.29709
72.8	-1.49772			-1.86089
72.9	-1.43531			-0.985172
73	-2.11347			-1.83337
73.1	-2.04553			-1.17571
73.2	-3.09812			0.251568
73.3	-4.04039			0.835438
73.4	-3.91416			1.18124
73.5	-4.25308			0.884099
73.6	-3.98268			0.757795
73.7	-2.60032			1.41783
73.8	-2.32418			1.39399
73.9	-0.836639			1.23435
74	-0.460214			1.00943
74.1	-1.02149			0.271479
74.2	-0.784338			0.430362
74.3	-1.41045			0.284
74.4	-1.93138			0.173948
74.5	-1.43531			0.666269
74.6	-2.11347			1.43487
74.7	-2.04553
74.8	-3.09812
74.9	-3.78945
75	-3.92299
75.1	-4.63865
75.2	-4.52312
75.3	-4.19266
75.4	-4.46494

## Sheet: Fig 3e
Time (s)	F188_Ixo_GoA	F188_ACh_GoA	F188_Arec_GoA	F188_Pilo_GoA		F188_Ixo_endo	F188_ACh_endo	F188_Arec_endo	F188_Pilo_endo
0	-0.81487	-0.110165	-0.857438	-1.0379		0.208007	-1.80768	-0.0960763	-1.19918
0.1	-1.14439	-0.287431	-0.474398	-0.751648		-0.38666	-0.000693441	-0.101105	1.71537
0.2	-1.37662	-0.220054	-0.377666	0.155387		0.066571	0.83655	-0.221719	-1.36147
0.3	-0.939529	-0.247921	-0.0863867	0.285565		-0.27486	1.51538	-0.359582	1.51069
0.4	-0.356039	-0.0227114	0.174592	0.359113		0.179286	-0.0869142	-0.41196	-1.49833
0.5	0.262658	0.220551	0.470847	-0.0250814		0.368346	-0.0252075	-0.10605	2.19379
0.6	1.084	0.204943	0.419253	0.0110907		0.062925	-0.270065	0.226233	-1.68808
0.7	1.1849	0.357132	0.208152	0.00906537		0.296674	-0.349013	0.233339	0.0355309
0.8	0.442375	0.361633	0.247508	0.141914		0.0615806	-0.730187	0.162449	0.441049
0.9	0.0836575	0.226837	0.436706	0.136467		-0.532528	0.616553	0.0774414	-0.149376
1	-0.0863638	0.385622	0.071358	0.450207		-0.118889	0.939316	-0.26103	0.341498
1.1	1.10875	0.391057	0.258777	-0.120518		-0.34891	0.32315	-0.433454	-0.485407
1.2	0.378261	0.639624	0.32092	-0.291449		-0.125796	0.266786	-0.534459	1.46389
1.3	1.31006	0.848962	0.38682	-0.250802		-0.369203	1.66826	-0.39553	-1.34845
1.4	1.6318	0.849642	0.792782	-0.580084		-0.0835136	1.56502	0.082087	0.925352
1.5	1.4735	0.92886	0.399219	-1.42961		-0.241006	0.66836	0.029715	0.255088
1.6	1.32994	1.20803	0.588152	-1.38023		-0.450268	-0.438563	-0.434019	2.15883
1.7	0.574516	1.22496	0.8625	-0.943732		-0.218402	0.693145	-0.425104	-0.523962
1.8	-0.356309	1.09039	0.764728	-1.13858		0.0224901	0.95047	-0.842951	1.87759
1.9	-0.728732	0.926371	0.801192	-0.96514		0.449334	-0.429679	-0.546325	0.661288
2	-1.59327	0.659756	0.611476	-0.735718		-0.23477	1.32887	-0.480537	2.65261
2.1	-0.244778	0.711671	0.401366	0.0232124		-0.88581	1.22948	-0.148105	0.165145
2.2	-0.379652	0.71955	0.494188	-0.0365369		-0.921642	1.11967	0.437401	2.4113
2.3	0.359118	0.865622	0.142697	-0.519056		-1.35694	0.281178	0.583968	0.157025
2.4	1.4567	1.15368	0.219142	-0.111304		-1.37618	-0.690357	0.652998	3.10865
2.5	1.89527	1.06517	0.482238	0.609075		-0.815743	0.224607	0.815311	-0.142371
2.6	1.31356	1.15768	0.66201	0.422562		-0.505448	0.23678	0.554797	2.14191
2.7	0.0625087	1.27516	0.655692	1.04992		0.345055	-0.120446	0.866661	-0.488878
2.8	0.25706	1.40072	0.822501	1.05848		-0.142034	-0.593347	0.833969	2.94203
2.9	0.480047	1.73071	0.914613	1.84462		-0.27761	0.316932	0.998637	-0.634361
3	0.46719	1.87112	0.956006	2.01104		-0.206561	0.495374	0.989154	3.09247
3.1	1.09894	1.92185	1.21415	1.198		-0.258165	0.482561	1.07503	0.665875
3.2	1.30285	1.83662	1.27273	1.38234		-0.113641	-0.074822	0.885331	3.25029
3.3	1.80479	1.63751	1.51154	0.963232		0.125227	1.69913	0.657767	0.0682599
3.4	1.62749	1.73035	1.48657	0.946473		0.151871	1.34886	0.182397	3.49378
3.5	0.880604	1.82825	1.42922	1.00917		1.19881	0.955265	-0.134744	-0.0667474
3.6	0.553539	1.96606	1.54844	0.728813		1.05374	-0.697181	-0.122748	2.52065
3.7	1.20608	1.60231	1.35549	0.884068		1.17346	0.949716	0.0406938	0.0934266
3.8	1.02927	0.907945	1.28841	0.84107		0.674332	0.221061	0.410533	2.8873
3.9	-0.00075599	-0.0433141	0.978724	0.77231		0.319758	-0.0290529	0.665178	0.0238773
4	-0.754362	-0.988105	0.703916	0.606696		0.435001	-1.58746	0.152915	1.78759
4.1	-0.946399	-1.87463	0.933039	-0.177335		-0.299474	-0.861841	-0.2004	1.70862
4.2	-0.731491	-2.61232	0.58836	-0.861423		-0.735614	-2.47251	-0.991377	1.27607
4.3	-0.614155	-2.99875	0.761902	-2.49881		-1.35097	-3.36165	-1.73259	1.73199
4.4	-1.4436	-3.53027	0.520517	-3.6684		-2.22212	-4.91015	-1.75246	1.03085
4.5	-1.05093	-4.1119	-0.0891348	-4.47288		-2.97079	-4.03328	-1.85302	1.92328
4.6	-1.96672	-4.78185	-0.376687	-4.93193		-3.79212	-4.35244	-1.71295	0.397224
4.7	-3.19902	-5.66978	-0.98073	-5.11583		-3.67033	-4.60931	-1.79633	1.2995
4.8	-3.12126	-6.56572	-1.18709	-5.09442		-2.49677	-6.3832	-2.09728	-1.02221
4.9	-3.17145	-7.15616	-1.35286	-4.98416		-2.78978	-5.5484	-2.48542	0.969424
5	-2.48334	-7.61466	-2.02921	-5.78272		-3.05755	-6.25211	-2.66709	-2.03718
5.1	-2.40407	-7.7384	-2.16621	-6.36846		-3.63502	-7.00928	-2.83103	-1.04967
5.2	-3.11044	-7.91839	-2.49735	-5.87551		-3.92501	-8.44598	-2.76758	-2.37315
5.3	-3.38738	-7.83986	-2.94891	-5.25215		-4.41675	-7.77184	-2.68302	-0.191589
5.4	-3.79527	-8.05808	-2.83721	-6.04567		-4.73244	-7.17294	-2.53115	-3.46462
5.5	-4.568	-8.61045	-2.72807	-6.81775		-4.93643	-7.83167	-2.90328	-1.94724
5.6	-4.85306	-9.35582	-2.38467	-7.02664		-4.4107	-9.04537	-3.35196	-4.73268
5.7	-5.14372	-9.97594	-2.47187	-6.76841		-4.75357	-7.95788	-3.7866	-2.31321
5.8	-4.11744	-10.2447	-3.02837	-7.25823		-5.09403	-7.61176	-3.78428	-4.85263
5.9	-3.81458	-10.426	-3.30414	-6.68607		-4.78138	-8.24523	-3.97419	-2.65978
6	-4.47487	-10.5389	-3.54714	-5.80087		-4.71316	-9.3981	-4.59617	-5.79755
6.1	-4.44661	-10.6764	-3.84783	-5.92495		-4.54116	-8.44418	-4.65938	-3.52016
6.2	-4.78823	-10.8049	-3.99138	-6.78722		-4.26955	-7.73039	-4.59572	-6.50117
6.3	-5.48578	-11.0681	-3.94232	-7.29657		-3.93879	-8.3901	-5.24608	-3.86784
6.4	-5.65245	-11.4327	-3.55402	-7.78058		-3.67475	-10.0431	-5.38868	-6.92695
6.5	-6.34178	-11.5331	-3.76199	-7.88501		-4.32083	-8.33464	-5.18627	-4.11827
6.6	-5.90827	-11.4939	-4.079	-8.63152		-4.99846	-8.79973	-5.15213	-7.37915
6.7	-6.79378	-11.6902	-4.2018	-9.11088		-5.3184	-8.84593	-5.00617	-4.11269
6.8	-7.84944	-11.9319	-3.90243	-9.44045		-5.87574	-10.8099	-5.31754	-6.65985
6.9	-6.64947	-12.1625	-3.91816	-9.62457		-5.96988	-9.03411	-5.26361	-5.38646
7	-6.62602	-12.2192	-3.84735	-9.11637		-5.74629	-8.84105	-5.20239	-7.65146
7.1	-6.22584	-12.3737	-3.73219	-9.02077		-5.35727	-8.79748	-5.52659	-5.11235
7.2	-5.36637	-12.486	-3.85025	-9.30151		-5.94681	-11.0138	-5.37152	-8.31236
7.3	-4.61955	-12.5494	-4.1057	-9.73736		-6.63794	-9.37141	-5.32048	-6.72221
7.4	-5.06679	-12.6754	-4.22062	-10.5404		-6.88365	-9.01508	-5.16352	-7.3272
7.5	-5.68707	-12.9852	-4.69951	-12.0912		-7.17584	-8.54876	-4.86971	-7.67328
7.6	-6.53981	-13.4784	-4.59727	-11.5841		-7.29889	-10.3265	-5.31403	-6.82294
7.7	-6.74296	-13.7837	-4.81896	-10.6452		-7.26531	-8.96636	-5.43127	-8.34447
7.8	-7.89052	-13.7772	-4.3971	-9.45228		-6.8016	-9.03488	-5.71535	-6.81643
7.9	-7.99601	-13.7679	-4.37895	-9.15387		-6.71231	-9.38907	-5.86905	-9.06414
8	-8.25219	-13.6138	-4.44009	-9.04243		-6.86321	-11.2717	-5.85572	-7.50913
8.1	-8.51495	-13.7086	-4.5173	-9.17438		-6.76387	-10.0525	-5.79238	-7.48589
8.2	-8.71516	-13.7475	-4.68869	-10.2112		-7.13436	-9.31598	-5.57246	-6.15801
8.3	-8.34186	-14.1036	-5.32926	-11.237		-7.29917	-9.19803	-5.61415	-8.77757
8.4	-8.45037	-14.5733	-5.61314	-11.4726		-7.27887	-11.2525	-5.99074	-7.6059
8.5	-8.14956	-14.7167	-5.50535	-11.2766		-7.30399	-9.78421	-6.14298	-9.3949
8.6	-7.86402	-14.5774	-5.25479	-10.3808		-6.61333	-9.97323	-6.2626	-7.43128
8.7	-7.38144	-14.4178	-5.40423	-10.278		-7.09776	-10.146	-6.21635	-8.78036
8.8	-8.22904	-14.1212	-5.34686	-10.2239		-7.80156	-11.0567	-6.19991	-7.24445
8.9	-8.65814	-14.081	-5.42701	-10.1133		-8.10377	-9.57836	-6.28989	-9.55743
9	-8.19569	-14.2364	-5.33317	-10.7586		-8.5038	-9.30264	-6.20842	-7.8942
9.1	-7.85527	-14.615	-5.21939	-11.1439		-8.63654	-9.19987	-6.21473	-9.82924
9.2	-7.43056	-14.8993	-5.2049	-11.8825		-7.95897	-11.3999	-6.20649	-7.30929
9.3	-7.59386	-15.1716	-5.12006	-11.4506		-7.38305	-9.81359	-6.34913	-10.0276
9.4	-7.35924	-15.176	-5.36215	-11.0907		-6.18719	-10.352	-6.17294	-7.89748
9.5	-7.96389	-15.1961	-5.9647	-11.7544		-6.87785	-10.3452	-6.41645	-10.5629
9.6	-9.05791	-15.2319	-6.55855	-11.7684		-7.73406	-11.1433	-6.67721	-6.66618
9.7	-9.67708	-15.2058	-6.97327	-11.2636		-7.82209	-9.74588	-6.7077	-9.3688
9.8	-9.95793	-15.1808	-6.99777	-11.3422		-7.84599	-9.64757	-6.6491	-7.75138
9.9	-8.8088	-15.2295	-6.61391	-11.1375		-8.3795	-9.71201	-7.01465	-10.5577
10	-9.1046	-15.2363	-6.27822	-11.2467		-8.12255	-11.2202	-7.41049	-8.04092
10.1	-9.58026	-15.4146	-6.21142	-11.2332		-7.57116	-10.2887	-7.63469	-10.579
10.2	-9.36191	-15.4469	-5.97053	-11.3682		-7.20775	-10.0339	-7.44372	-8.20233
10.3	-9.14317	-15.586	-5.90324	-12.0211		-7.49882	-10.4399	-7.27917	-10.4786
10.4	-8.82751	-15.848	-6.16401	-11.7382		-8.13416	-10.6673	-7.00941	-7.89692
10.5	-8.94005	-15.9927	-6.54919	-11.4741		-8.11097	-11.5953	-6.59462	-10.763
10.6	-9.25794	-16.1519	-6.61525	-11.4402		-8.10612	-10.7648	-6.33668	-9.49693
10.7	-8.50383	-16.2566	-6.60008	-11.3101		-8.52942	-10.8948	-6.62121	-9.49612
10.8	-9.50391	-16.0439	-6.91678	-11.4423		-8.53339	-11.4757	-7.17703	-10.4797
10.9	-10.1313	-15.9925	-7.1464	-11.5431		-7.84379	-10.8679	-7.48767	-9.2734
11	-10.6312	-15.9827	-6.93565	-10.8773		-7.90902	-10.0063	-7.38432	-10.552
11.1	-9.51624	-16.0499	-6.86503	-10.7771		-7.77557	-10.1336	-7.42981	-9.80333
11.2	-8.84022	-16.1865	-6.87535	-10.6606		-7.94026	-10.2349	-7.69003	-10.4904
11.3	-8.69392	-16.306	-6.83204	-11.0999		-7.98214	-11.9573	-7.84737	-10.1653
11.4	-8.52413	-16.5342	-6.77568	-11.8207		-8.24051	-10.3667	-7.49605	-10.4057
11.5	-8.78181	-16.5264	-6.6554	-12.3639		-8.15395	-9.68038	-7.29754	-9.62865
11.6	-9.927	-16.4138	-6.83237	-12.7258		-8.0612	-10.376	-7.17408	-10.9152
11.7	-10.8669	-16.234	-6.73271	-12.7748		-7.72123	-10.5655	-6.90324	-9.26634
11.8	-11.674	-16.2841	-6.63344	-11.6104		-7.73569	-10.0952	-6.56874	-10.9937
11.9	-11.255	-16.4043	-6.73952	-11.3249		-7.67154	-9.5475	-6.75205	-9.55464
12	-11.0058	-16.6213	-6.7615	-11.0923		-7.51627	-10.4844	-7.02143	-11.1691
12.1	-10.4225	-16.8325	-6.78366	-11.6395		-7.93421	-10.9422	-7.40402	-9.24154
12.2	-9.77773	-16.8812	-6.92058	-12.079		-8.17682	-10.8572	-7.72432	-11.756
12.3	-10.0539	-16.6854	-6.87003	-12.3612		-8.41802	-10.4844	-7.51581	-9.80816
12.4	-10.338	-16.6498	-7.01415	-12.6832		-8.9797	-12.5249	-7.28574	-12.0791
12.5	-9.94954	-16.5108	-6.87174	-13.0469		-9.35144	-12.0966	-7.22191	-9.5847
12.6	-10.3417	-16.7023	-6.99572	-12.5982		-8.90151	-11.3005	-7.14633	-11.6639
12.7	-10.9878	-16.8105	-6.96154	-13.251		-8.82106	-10.2577	-7.16837	-9.40916
12.8	-10.7964	-17.0955	-7.06585	-13.3347		-8.90661	-10.7438	-7.01977	-11.8363
12.9	-11.0082	-17.3072	-7.16186	-13.5592		-8.90366	-9.74588	-7.15929	-9.45112
13	-11.2167	-16.9452	-7.0906	-13.1443		-8.42731	-9.64757	-7.18983	-12.4537
13.1	-11.1787	-16.7419	-7.25188	-12.4516		-8.37887	-9.71201	-6.87505	-8.91487
13.2	-11.2298	-16.6279	-7.59543	-11.8408		-8.42356	-11.2202	-6.71357	-12.034
13.3	-10.2329	-16.5826	-7.75766	-12.0054		-8.51065	-10.2887	-6.87248	-9.19245
13.4	-9.74961	-16.5103	-7.95799	-11.8902		-7.94124	-10.0339	-6.9499	-12.3565
13.5	-9.45504	-16.4848	-7.63314	-12.7096		-8.51835	-10.4399	-7.35695	-9.83674
13.6	-8.3055	-16.8421	-7.57621	-12.7999		-9.23658	-10.6673	-7.7342	-13.1731
13.7	-9.14486	-17.2292	-7.19403	-13.279		-9.55635	-11.5953	-7.90385	-11.4245
13.8	-9.02801	-17.1917	-6.84121	-13.4114		-8.79682	-10.7648	-7.86443	-10.8951
13.9	-9.3269	-17.4107	-6.83319	-13.602		-8.7989	-10.8948	-7.96934	-11.6546
14	-10.0671	-17.3422	-6.94508	-13.8159		-8.90661	-11.4757	-8.11565	-11.113
14.1	-10.6836	-17.2707	-7.28987	-13.6645		-8.90366	-10.8679	-7.78196	-11.7785
14.2	-10.7079	-17.1969	-7.23883	-13.8394		-8.42731	-10.0063	-7.87816	-9.99809
14.3	-10.5998	-16.9651	-7.47488	-13.458		-8.37887	-10.1336	-8.10928	-11.5564
14.4	-10.5932	-17.1521	-7.72206	-13.1276		-8.60226	-10.2349	-8.16825	-10.4352
14.5	-10.8085	-17.3557	-7.66568	-13.5757		-8.41044	-11.9573	-7.7989	-12.2345
14.6	-10.3805	-17.3393	-8.03955	-13.5447		-7.64257	-10.3667	-7.86801	-10.7601
14.7	-11.2255	-17.3715	-8.04055	-13.7292		-8.06754	-9.68038	-8.0049	-12.0469
14.8	-12.1336	-17.3756	-7.98157	-13.7717		-8.37409	-10.376	-8.02683	-10.5132
14.9	-12.8704	-17.4464	-8.17123	-13.7385		-8.63707	-10.5655	-7.68465	-11.9328
15	-12.733	-17.6709	-7.76642	-14.2327		-8.90363	-10.0952	-7.95639	-11.4325
15.1	-11.7931	-17.5142	-7.9439	-14.0497		-9.31173	-9.97537	-8.11565	-12.8522
15.2	-11.0298	-17.742	-7.84514	-13.7241		-8.90151	-10.0095	-7.78196	-10.8086
15.3	-9.01637	-17.708	-7.84434	-14.1801		-8.82106	-10.4355	-7.87816	-13.1858
15.4	-8.62356	-17.4717	-8.11563	-14.5699		-8.90661	-9.97328	-8.05606	-10.7303
15.5	-8.67042	-17.4177	-7.97158	-14.8193		-8.90366	-10.2401	-8.11352	-13.0742
15.6	-9.6986	-17.3444	-8.04296	-15.097		-8.42731	-10.5703	-8.18456	-10.6491
15.7	-9.9613	-17.5207	-8.14001	-16.3432		-8.37887	-10.1242	-7.84707	-13.6542
15.8	-12.0518	-17.5051	-7.98835	-16.5731		-8.42356	-10.2947	-8.07989	-9.89513
15.9	-12.5703	-17.3988	-8.03466	-16.2642		-8.51065	-10.5655	-8.19895	-12.9655
16	-13.5368	-17.5901	-7.8827	-15.6126		-7.94124	-10.0952	-7.86764	-10.3272
16.1	-13.0582	-17.595	-7.69426	-15.2713		-8.51835	-9.5475	-7.89073	-13.1989
16.2	-12.2548	-17.4006	-7.80555	-15.1618		-9.23658	-10.4844	-7.86801	-10.714
16.3	-11.0068	-17.3693	-8.12531	-14.3186		-9.55635	-10.9422	-8.0049	-13.3309
16.4	-11.2912	-17.2398	-8.28281	-14.2104		-8.79682	-10.8572	-8.02683	-10.6499
16.5	-9.59656	-17.2707	-8.46597	-15.152		-8.7989	-10.4844	-7.68465
16.6	-10.8856	-17.1969	-8.56523	-14.715		-8.90661	-12.5249	-7.95639
16.7	-11.0359	-16.9651	-8.44089	-14.6116		-8.90366	-12.0966	-8.11565	-11.4325
16.8	-12.106	-17.1521	-8.0875	-14.6714		-8.42731	-11.3005	-7.78196	-12.8522
16.9	-12.2368	-17.3557	-7.85878	-14.5118		-8.37887	-10.2577	-7.79185	-10.8086
17	-11.3042	-17.3393	-8.04734	-14.2596		-8.61945	-10.7438	-8.25517	-13.1858
17.1	-11.6768	-17.3715	-8.29083	-13.6365		-8.50064	-9.74588	-8.07104	-10.7303
17.2	-12.0163	-17.3756	-8.26427	-13.2899		-7.60213	-9.64757	-8.09266	-13.0742
17.3	-10.9107	-17.4464	-8.44645	-13.6292		-7.79183	-9.71201	-8.24201	-10.6491
17.4	-11.4371	-17.6709	-8.28039	-13.7754		-8.18106	-11.2202	-8.28443	-13.6542
17.5	-12.3184	-17.5142	-8.07619	-14.5813		-8.10459	-10.2887	-8.13126	-9.89513
17.6	-12.3371	-17.742	-7.92074	-15.1032		-7.84176	-10.0339	-7.6461	-12.9655
17.7	-11.8895	-17.708	-8.05292	-15.4198		-8.11084	-10.4399	-7.72268	-10.3272
17.8	-10.6978	-17.4717	-8.24675	-15.392		-8.37409	-10.6673	-7.51561	-13.1989
17.9	-11.6739	-17.4177	-8.43892	-15.2088		-8.63707	-11.5953	-7.3392	-10.714
18	-12.1025	-17.3444	-8.69741	-13.9815		-8.90363	-10.7648	-7.8012	-13.3309
18.1	-12.5005	-17.4609	-9.13892	-13.8645		-9.31173	-10.8948	-7.96615	-10.6499
18.2	-12.9795	-17.5451	-9.07076	-13.3512		-8.90151	-11.4757	-8.00749
18.3	-13.2907	-17.5491	-8.93907	-13.6401		-8.82106	-10.8679	-7.87112
18.4	-12.1763	-17.681	-8.8911	-14.0216		-8.90661	-10.0063	-8.11565	-11.4325
18.5	-12.3026	-17.6048	-8.68781	-14.9274		-8.90366	-10.1336	-7.78196	-12.8522
18.6	-12.7813	-17.578	-8.57832	-15.614		-8.42731	-10.2349	-7.79185	-10.8086
18.7	-13.4352	-17.6017	-8.37746	-15.8872		-8.37887	-11.9573	-8.25517	-13.1858
18.8	-13.5374	-17.6927	-8.30798	-15.5722		-8.42356	-10.3667	-8.07104	-10.7303
18.9	-13.9147	-17.708	-8.36485	-15.4322		-8.51065	-9.68038	-8.09266	-13.0742
19	-13.4677	-17.4717	-8.39214	-14.4332		-8.18433	-10.1876	-8.24201	-10.6491
19.1	-12.8167	-17.4177	-8.22242	-14.4117		-8.41332	-10.5775	-8.28443	-13.6542
19.2	-12.2128	-17.3444	-8.36316	-14.58		-8.68941	-10.493	-8.13126	-9.89513
19.3	-12.4181	-17.5207	-8.40158	-15.3187		-8.59319	-10.5238	-7.61125	-12.9655
19.4	-13.0334	-17.5051	-8.81833	-15.1163		-8.5003	-11.0037	-7.82207	-10.3272
19.5	-12.0957	-17.3988	-8.8959	-15.2318		-8.42502	-11.7076	-7.48151	-13.1989
19.6	-11.1826	-17.5901	-8.8885	-15.2009		-8.5677	-11.4819	-7.29682	-10.714
19.7	-11.1363	-17.595	-8.74588	-15.338		-9.11735	-10.2222	-7.80122	-13.3309
19.8	-10.9853	-17.4006	-8.93557	-15.5058		-9.55635	-9.68038	-8.13153	-10.6499
19.9	-12.1783	-17.3693	-8.73184	-15.4268		-8.79682	-10.376	-8.02076
20	-12.6112	-17.2398	-9.10776	-15.225		-8.7989	-10.5655	-7.85167
20.1	-13.363	-17.2707	-8.93344	-15.2139		-8.90661	-10.0952	-7.63479	-10.7303
20.2	-14.7177	-17.1969	-8.79215	-14.6938		-8.90366	-9.5475	-7.53739	-13.0742
20.3	-14.0066	-16.9651	-8.81158	-14.4083		-8.42731	-10.4844	-7.17805	-10.6491
20.4	-13.2486	-17.1521	-8.62559	-13.9478		-8.37887	-11.6361	-7.70858	-13.6542
20.5	-11.9721	-17.3557	-8.49819	-13.6899		-8.61945	-10.1863	-7.71114	-9.89513
20.6	-12.0274	-17.4381	-8.62873	-14.4863		-8.50064	-9.64479	-8.02416	-12.9655
20.7	-12.4757	-17.2659	-8.65386	-14.5064		-7.60213	-10.0613	-8.2336	-10.3272
20.8	-13.3026	-17.2509	-8.93314	-14.9465		-7.79183	-10.5072	-8.07104	-13.1989
20.9	-14.4736	-17.3061	-8.79722	-15.4216		-8.18106	-11.5671	-8.09266	-10.714
21	-14.849	-17.3763	-8.45097	-15.9315		-8.10459	-10.718	-8.24201	-13.3309
21.1	-14.942	-17.2052	-8.48318	-15.7136		-7.84176	-11.4712	-8.28443	-10.6499
21.2	-14.7144	-17.3442	-8.27331	-15.8903		-8.11084	-11.5682	-8.13126
21.3	-13.4746	-17.4859	-8.31654	-15.2561		-8.37409	-10.8919	-7.61125
21.4	-12.882	-17.6709	-8.50191	-15.7921		-8.9055	-10.2148	-7.82207	-11.4325
21.5	-12.1728	-17.5142	-8.76451	-15.7159		-8.42472	-9.33242	-7.48151	-12.8522
21.6	-12.3122	-17.742	-9.01319	-15.9637		-8.77268	-9.71201	-7.29682	-10.8086
21.7	-11.562	-17.708	-9.22188	-15.6681		-9.29338	-11.2202	-7.80122	-13.1858
21.8	-11.287	-17.4717	-9.30654	-15.1738		-9.20887	-10.2887	-8.13153	-10.7303
21.9	-12.0137	-17.4177	-9.24325	-14.5957		-8.75219	-10.0339	-8.02076	-13.0742
22	-12.6942	-17.3444	-9.13461	-14.6447		-8.57129	-10.4399	-7.79869	-10.6491
22.1	-12.6559	-17.4609	-9.1098	-14.0498		-8.24658	-10.6673	-7.72268	-13.6542
22.2	-13.0155	-17.5451	-9.24673	-14.705		-8.51065	-11.5953	-7.51561
22.3	-13.8428	-17.5491	-9.01845	-15.0701		-8.18433	-10.7648	-7.3392
22.4	-14.692	-17.681	-8.77479	-15.7407		-8.41332	-10.8948	-7.8012
22.5	-14.7053	-17.6048	-8.77976	-16.1869		-8.74712	-11.4757	-7.96615	-13.6542
22.6	-15.3816	-17.578	-9.174	-15.8917		-8.82536	-10.8679	-8.00749	-9.89513
22.7	-15.1611	-17.6017	-8.89473	-15.6563		-7.96723	-10.0063	-7.87112	-12.9655
22.8	-14.6059	-17.6927	-8.79121	-15.4461		-8.01361	-10.1336	-8.11565	-10.3272
22.9	-13.3668	-17.708	-8.69888	-15.1436		-8.30853	-10.2349	-7.78196	-13.1989
23	-13.6056	-17.4717	-8.6639	-15.907		-8.6357	-11.9573	-7.79185	-10.714
23.1	-13.4948	-17.4177	-8.46804	-15.8018		-8.63239	-10.3667	-8.25517	-13.3309
23.2	-13.5563	-17.3444	-8.55086	-15.5629		-8.43589	-9.68038	-8.07104	-10.6499
23.3	-13.3615	-17.5207	-8.73669	-16.0266		-8.6942	-10.1876	-8.09266
23.4	-13.4771	-17.5051	-9.22944	-15.8804		-8.08474	-10.5775	-8.24201
23.5	-13.216	-17.3988	-9.03712	-16.1344		-7.67823	-10.493	-8.28443	-11.4325
23.6	-12.2627	-17.5901	-9.16827	-16.3345		-8.42131	-10.5238	-8.13126	-12.8522
23.7	-12.6769	-17.595	-9.177	-16.5072		-8.90332	-11.0037	-7.61125	-10.8086
23.8	-13.7004	-17.4006	-9.07199	-16.4519		-8.73956	-11.7076	-7.82207	-13.1858
23.9	-13.8669	-17.3693	-9.19257	-16.4192		-8.47436	-11.4819	-7.48151	-10.7303
24	-13.9213	-17.2398	-9.2286	-15.8686		-8.49699	-10.2222	-7.29682	-13.0742
24.1	-13.5282	-17.3757	-9.14402	-16.3385		-8.6172	-9.68038	-7.80122	-10.6491
24.2	-12.9052	-16.9767	-9.56266	-16.4193		-7.44539	-10.376	-8.13153	-13.6542
24.3	-12.2567	-16.9325	-9.49249	-16.6103		-7.93077	-10.5655	-8.02076	-9.89513
24.4	-11.7231	-17.1421	-9.42999	-16.8234		-8.64384	-10.0952	-7.76383	-12.9655
24.5	-11.3936	-17.2832	-9.46751	-16.601		-8.82194	-9.5475	-7.68051	-10.3272
24.6	-11.8625	-17.3001	-9.57322	-16.3339		-8.54598	-10.4844	-7.68428	-13.1989
24.7	-12.1048	-17.3899	-9.70107	-16.9733		-8.49772	-11.4824	-7.61067	-10.714
24.8	-12.7355	-17.4685	-9.50898	-16.9903		-8.3644	-10.5575	-7.64878	-13.3309
24.9	-12.9933	-17.6709	-9.41009	-17.6432		-8.21617	-9.38149	-8.14894	-10.6499
25	-13.0802	-17.5142	-9.25253	-17.2345		-7.40578	-10.575	-8.06233
25.1	-13.2904	-17.742	-8.85233	-16.5778		-7.53616	-10.7375	-8.20204
25.2	-13.6896	-17.708	-8.47281	-16.585		-8.00006	-10.8888	-8.1506	-10.7303
25.3	-13.7964	-17.4717	-8.41321	-16.4564		-8.13421	-10.4901	-8.34733	-13.0742
25.4	-14.8525	-17.4177	-8.58372	-16.3409		-8.41802	-12.5269	-8.52861	-10.6491
25.5	-14.7266	-17.3444	-8.85727	-16.7706		-8.9797	-12.0966	-8.36013	-13.6542
25.6	-14.9805	-17.4609	-9.15373	-17.4435		-9.35144	-11.3005	-8.12819	-9.89513
25.7	-15.1908	-17.5451	-9.55748	-18.3108		-8.90151	-10.2577	-8.35188	-12.9655
25.8	-13.988	-17.5491	-9.49689	-18.2025		-8.82106	-10.7438	-8.30477	-10.3272
25.9	-13.0575	-17.681	-9.69286	-17.6325		-8.90661	-9.74588	-8.19225	-13.1989
26	-12.5773	-17.6048	-9.69824	-17.6184		-8.83755	-9.64757	-8.01582
26.1	-11.9928	-17.578	-9.7689	-16.6408		-8.68279	-9.71201	-8.62741
26.2	-11.7243	-17.6017	-9.74098	-16.0482		-8.11846	-11.2202	-8.44985
26.3	-11.1142	-17.6927	-9.8481	-15.7324		-8.39258	-10.2887	-8.33633
26.4	-10.8151	-17.708	-9.99641	-16.0148		-8.70181	-10.0339	-8.66779
26.5	-11.0732	-17.4717	-9.84052	-16.0867		-8.24786	-10.4399	-8.67413	-13.1989
26.6	-11.7303	-17.4177	-9.69902	-16.1369		-8.43523	-10.6673	-8.41271	-10.714
26.7	-12.9058	-17.3444	-9.77702	-16.3617		-8.62018	-11.5953	-7.56073	-13.3309
26.8	-14.1081	-17.5207	-9.73378	-16.8502		-8.3644	-10.7648	-7.49679	-10.6499
26.9	-14.1311	-17.5051	-9.93012	-16.2862		-8.21617	-10.8948	-8.17916
27	-14.7637	-17.3988	-9.87333	-16.9949		-7.40578	-11.4757	-8.15588
27.1	-14.9533	-17.5901	-9.92728	-17.0372		-7.53616	-10.8679	-8.46623	-11.4325
27.2	-13.4203	-17.595	-9.86637	-16.9087		-8.00006	-10.0063	-8.18766	-12.8522
27.3	-12.7573	-17.4006	-9.47491	-16.2982		-8.13421	-10.1336	-8.15859	-10.8086
27.4	-12.3957	-17.3693	-9.40674	-16.9768		-8.41802	-10.2349	-7.92324	-13.1858
27.5	-12.3186	-17.2398	-9.22625	-17.0247		-8.9797	-11.9573	-7.36623	-10.7303
27.6	-11.4978	-17.2687	-9.23855	-17.1982		-9.35144	-10.3667	-7.66596	-13.0742
27.7	-11.7578	-17.0703	-9.59043	-17.1154		-8.90151	-9.68038	-8.26195	-10.6491
27.8	-12.9013	-17.1185	-9.6173	-17.1895		-8.62211	-10.376	-8.47889	-13.6542
27.9	-14.5842	-17.3844	-9.79024	-17.2619		-8.87349	-10.5655	-8.55619
28	-15.1459	-17.4297	-9.79133	-17.0918		-9.38228	-10.0952	-8.20276
28.1	-16.7095	-17.5098	-9.62707	-16.322		-9.38565	-9.97537	-7.91715
28.2	-16.6547	-17.683	-9.60555	-16.7532		-9.26038	-10.0095	-8.0221	-13.6542
28.3	-16.5694	-17.6659	-9.58578	-16.4184		-9.23093	-10.4355	-7.70181	-9.89513
28.4	-14.482	-17.8726	-9.96181	-16.8266		-9.12668	-9.97328	-7.81827	-12.9655
28.5	-13.6479	-18.1877	-10.4667	-17.5267		-7.64528	-10.2401	-7.6146	-10.3272
28.6	-12.4167	-18.1982	-10.5125	-17.7822		-7.67823	-10.5703	-7.32976	-13.1989
28.7	-12.6881	-18.0071	-10.7509	-17.8708		-8.42131	-10.1242	-7.57038	-10.714
28.8	-12.3881	-17.757	-10.5096	-18.1498		-8.90332	-10.2947	-7.69279	-13.3309
28.9	-13.6618	-17.731	-10.3071	-17.6246		-8.73956	-10.5655	-7.39787	-10.6499
29	-15.1403	-17.5063	-10.1326	-17.1932		-8.47436	-10.0952	-7.77796
29.1	-15.716	-17.243	-9.89457	-16.9498		-8.49699	-9.5475	-8.02312
29.2	-15.1666	-17.241	-9.97215	-16.569		-8.6172	-10.4844	-8.10337	-11.4325
29.3	-14.8666	-17.2687	-10.2282	-16.6943		-7.44539	-10.9422	-7.55637	-12.8522
29.4	-14.6486	-17.0703	-10.3474	-16.6679		-7.93077	-10.8572	-7.56916	-10.8086
29.5	-14.9791	-17.1185	-10.3975	-16.2407		-8.64384	-10.4844	-7.86452	-13.1858
29.6	-13.7481	-17.3844	-10.3335	-16.6996		-8.82194	-12.5249	-7.62979	-10.7303
29.7	-14.227	-17.4297	-10.1339	-16.5188		-8.54598	-12.0966	-7.6906	-13.0742
29.8	-15.5003	-17.5098	-10.185	-16.4587		-8.49772	-11.0244	-7.96891	-10.6491
29.9	-15.8228	-17.683	-9.97269	-16.6124		-8.3644	-10.5297	-8.23007	-13.6542
30	-15.6876	-17.8812	-10.2026	-16.9803		-8.21617	-10.5903	-7.99375
30.1	-15.4147	-17.7662	-10.2945	-17.1106		-7.40578	-11.2956	-7.6547
30.2	-14.9605	-17.619	-10.2424	-17.5545		-7.53616	-10.927	-7.8463	-12.8172
30.3	-14.3432	-17.687	-10.4491	-17.7402		-8.00006	-10.6865	-7.46049	-11.3153
30.4	-12.8778	-17.6966	-10.5959	-18.3131		-8.13421	-11.344	-6.97168	-12.2703
30.5	-12.6142	-17.3726	-10.4256	-17.968		-8.41802	-10.5236	-7.41805
30.6	-13.506	-17.3079	-10.8132	-17.674		-8.9797	-9.74588	-7.39054
30.7	-14.951	-17.2534	-10.6277	-16.8956		-9.35144	-9.64757	-7.72756	-12.8172
30.8	-16.7054	-17.2687	-10.447	-16.5577		-8.90151	-9.71201	-8.0151	-11.3153
30.9	-16.9798	-17.0703	-10.0459	-15.9331		-8.82106	-11.2202	-7.9847	-12.2703
31	-16.0623	-17.1185	-9.65893	-16.1538		-8.88943	-10.2887	-8.21261
31.1	-14.8596	-17.3844	-9.61528	-16.9595		-8.81345	-10.0339	-8.00899
31.2	-13.1554	-17.4297	-9.62736	-17.2039		-8.46776	-10.4399	-8.32534	-11.4325
31.3	-12.1265	-17.5098	-9.76659	-17.4334		-8.65457	-10.6673	-8.72073	-12.8522
31.4	-12.5205	-17.683	-10.4472	-17.3943		-8.79529	-11.5953	-8.48376	-10.8086
31.5	-13.0756	-17.7798	-10.4828	-17.2967		-8.94291	-10.7648	-8.42315	-13.1858
31.6	-15.3202	-17.8047	-10.5167	-17.5115		-8.70444	-11.0289	-8.21585	-10.7303
31.7	-15.4672	-17.8906	-10.3969	-17.3082		-9.26843	-10.9084	-7.61109	-13.0742
31.8	-15.3875	-17.9871	-10.2681	-18.1077		-8.90151	-11.4491	-7.56108	-10.6491
31.9	-14.8458	-17.751	-10.0647	-18.3086		-8.62211	-10.1775	-7.61067	-13.6542
32	-13.4276	-17.5273	-9.88115	-17.0354		-8.87349	-9.89458	-7.64878
32.1	-13.3413	-17.6161	-9.8899	-16.7257		-9.38228	-10.1099	-8.14894
32.2	-13.0144	-17.6253	-10.2164	-16.6906		-9.38565	-11.1083	-8.29535	-12.8172
32.3	-13.1752	-17.8726	-10.577	-17.197		-9.26038	-11.3225	-8.11407	-11.3153
32.4	-14.781	-18.0869	-10.8492	-17.5334		-9.23093	-10.927	-7.82348	-12.2703
32.5	-14.9594	-18.2495	-10.9743	-17.8031		-9.12668	-10.6865	-7.39655
32.6	-15.5211	-18.2268	-11.2702	-18.9614		-7.64528	-11.344	-7.4399
32.7	-15.2989	-18.0459	-11.1039	-19.149		-7.67823	-10.5236	-7.70157	-12.8172
32.8	-14.389	-18.0131	-10.7471	-18.6382		-8.42131	-9.74588	-7.39787	-11.3153
32.9	-14.4279	-17.7801	-10.6518	-18.683		-8.90332	-9.64757	-7.77796	-12.2703
33	-13.5362	-17.2715	-10.363	-18.5757		-8.73956	-9.49539	-7.8985
33.1	-13.3374	-17.0715	-10.4016	-18.473		-8.47436	-11.1596	-8.19522
33.2	-13.4161	-17.0754	-10.2221	-18.2954		-8.49699	-10.4666	-7.78196	-10.6491
33.3	-13.4298	-17.1589	-10.1342	-18.1292		-8.6172	-12.0392	-7.79185	-13.6542
33.4	-13.5926	-17.1654	-10.5379	-18.2042		-7.44539	-11.5444	-8.25517
33.5	-13.448	-17.3104	-10.3856	-18.4339		-7.93077	-11.6927	-8.07104
33.6	-13.7783	-17.3677	-10.6001	-18.5882		-8.64384	-10.7461	-8.09266
33.7	-13.9556	-17.2687	-10.9101	-18.687		-8.82194	-10.5236	-8.24201	-13.6542
33.8	-13.6138	-17.0703	-11.006	-18.6783		-8.54598	-9.74588	-8.28443	-9.89513
33.9	-13.4279	-17.1185	-11.1335	-18.5231		-8.49772	-9.64757	-8.13126	-12.9655
34	-13.5174	-17.3844	-11.157	-18.4112		-8.3644	-9.71201	-7.60574	-10.3272
34.1	-13.5058	-17.4297	-10.9188	-18.2732		-8.21617	-11.2202	-7.68418	-13.1989
34.2	-13.4801	-17.5098	-10.6204	-18.127		-7.40578	-10.2887	-7.69453	-10.714
34.3	-13.4925	-17.683	-9.79802	-18.2509		-7.53616	-10.0339	-7.62485	-13.3309
34.4	-13.7168	-17.7798	-9.72862	-18.1421		-8.00006	-10.4399	-7.66427	-10.6499
34.5	-13.8244	-17.8047	-9.62044	-18.1108		-8.13421	-10.6673	-8.07681
34.6	-13.6132	-17.8906	-9.92433	-18.0772		-8.41802	-11.5953	-8.40487
34.7	-13.4553	-17.9871	-10.4958	-18.0202		-8.9797	-10.7648	-7.98423	-11.4325
34.8	-13.4712	-17.751	-10.9613	-17.8695		-9.35144	-11.444	-8.09266	-12.8522
34.9	-13.4734	-17.5273	-11.376	-18.0221		-8.90151	-10.9881	-8.24201	-10.8086
35	-13.4614	-17.6161	-11.3223	-17.8521		-8.62211	-9.49401	-8.28443	-13.1858
35.1	-13.436	-17.6253	-11.0976	-18.005		-8.87349	-9.29727	-8.13126	-10.7303
35.2	-13.4733	-17.8726	-10.9589	-18.0764		-9.38228	-9.96438	-7.61125	-13.0742
35.3	-13.7393	-18.0869	-10.5891	-18.4534		-9.38565	-9.77005	-7.68051	-10.6491
35.4	-13.5298	-18.2495	-10.5158	-18.4358		-9.26038	-10.4161	-7.68428	-13.6542
35.5	-13.3667	-18.2268	-10.6381	-18.6864		-9.23093	-10.2548	-7.61067
35.6	-13.6588	-18.0353	-10.6543	-18.81		-9.12668	-11.4824	-7.64878
35.7	-13.6495	-17.9024	-10.8067	-18.3884		-7.64528	-10.5575	-8.14894	-12.8172
35.8	-13.4041	-17.8574	-10.754	-17.1406		-7.67823	-9.38149	-8.29535	-11.3153
35.9	-13.4198	-17.5599	-10.8734	-16.5811		-8.42131	-10.575	-8.11407	-12.2703
36	-13.2349	-17.4253	-10.8373	-16.255		-8.90332	-10.7375	-7.82348
36.1	-13.5446	-17.4204	-10.6777	-16.4332		-8.73956	-10.8888	-7.39655
36.2	-13.6138	-17.3506	-10.7305	-16.5378		-8.47436	-10.4901	-7.4399	-12.8172
36.3	-14.0806	-17.5194	-10.8534	-17.3356		-8.49699	-12.5269	-7.70157	-11.3153
36.4	-14.2486	-17.5051	-10.8197	-18.0726		-8.6172	-12.0966	-7.39787
36.5	-14.0272	-17.3988	-10.4875	-18.2357		-7.44539	-11.3005	-7.77796
36.6	-13.9449	-17.5901	-10.2919	-17.7332		-7.93077	-10.2577	-7.8985	-13.1858
36.7	-13.6797	-17.595	-10.6244	-17.8823		-8.64384	-10.7438	-8.19522	-10.7303
36.8	-13.1684	-17.4006	-10.822	-18.3069		-8.57885	-9.74588	-7.78196	-13.0742
36.9	-13.2472	-17.3693	-10.9027	-18.2078		-8.58995	-9.64757	-7.79185	-10.6491
37	-13.2262	-17.2398	-10.8311	-17.1841		-8.99725	-9.71201	-8.25517	-13.6542
37.1	-13.5437	-17.3757	-10.8816	-16.8285		-9.38672	-11.2202	-8.07104
37.2	-13.5061	-16.9767	-10.7423	-16.6472		-8.80716	-10.2887	-8.09266
37.3	-12.9769	-16.9325	-10.7167	-16.7092		-8.31513	-10.0339	-8.24201	-12.8172
37.4	-13.4814	-17.1421	-10.9785	-16.8792		-8.85726	-10.4399	-8.28443	-11.3153
37.5	-13.1376	-17.2832	-11.3125	-17.8324		-9.02289	-10.6673	-8.13126	-12.2703
37.6	-13.4745	-17.3001	-11.5162	-18.406		-8.42731	-11.5953	-7.60574
37.7	-14.263	-17.3899	-11.4471	-17.4609		-8.37887	-10.8588	-7.68418
37.8	-14.727	-17.4685	-11.3665	-16.5322		-8.42356	-10.9576	-7.69453	-12.8172
37.9	-15.2889	-17.6709	-11.4713	-16.1954		-8.51065	-10.9878	-7.62485	-11.3153
38	-15.0669	-17.5142	-11.4542	-16.3593		-7.94124	-10.7854	-7.66427	-12.2703
38.1	-14.1572	-17.742	-11.64	-16.4465		-8.51835	-9.76659	-8.07681
38.2	-14.1963	-17.708	-11.5584	-17.1957		-9.23658	-9.59283	-8.40487
38.3	-13.3046	-17.4717	-11.4706	-17.963		-9.55635	-9.60807	-7.98423	-10.6491
38.4	-13.1501	-17.4177	-11.5692	-18.4147		-8.79682	-11.2683	-8.09266	-13.6542
38.5	-13.011	-17.3444	-11.5915	-17.8235		-8.7989	-10.2887	-8.24201
38.6	-13.1791	-17.5207	-11.7257	-16.9932		-8.90661	-10.0339	-8.28443
38.7	-13.4935	-17.5051	-11.6528	-16.4626		-8.90366	-10.4399	-8.13126
38.8	-13.7156	-17.3988	-11.389	-16.4899		-8.42731	-10.6673	-7.61125	-13.6542
38.9	-13.75	-17.5901	-11.3475	-16.3649		-8.37887	-11.5953	-7.68051	-9.89513
39	-13.9381	-17.595	-11.1258	-16.8854		-8.60226	-10.7648	-7.68428	-12.9655
39.1	-13.9504	-17.4006	-11.2065	-17.5575		-8.41044	-11.444	-7.61067
39.2	-13.5844	-17.3693	-11.4899	-18.4503		-7.64257	-10.9881	-7.64878
39.3	-13.0731	-17.2398	-11.5201	-18.5538		-8.06754	-9.49401	-8.14894	-12.8172
39.4	-13.1519	-17.3757	-11.7223	-18.1326		-8.37409	-9.29727	-8.29535	-11.3153
39.5	-13.1308	-16.9767	-11.6682	-17.9767		-8.63707	-9.96438	-8.11407	-12.2703
39.6	-13.4483	-16.9325	-11.4693	-18.2733		-8.90363	-9.77005	-7.82348
39.7	-13.4107	-17.1421	-11.6902	-17.7544		-9.31173	-10.4161	-7.39655
39.8	-12.8815	-17.2832	-11.6119	-16.842		-8.90151	-10.2548	-7.4399	-12.8172
39.9	-13.386	-17.3001	-11.8465	-16.4618		-8.82106	-11.4824	-7.70157	-11.3153
40	-13.0423	-17.3899	-11.6294	-16.0773		-8.90661	-10.5575	-7.39787	-12.2703
40.1	-13.3792	-17.488	-11.681	-16.3137		-8.66057	-9.38149	-7.77796
40.2	-14.1677	-17.6096	-11.9242	-16.4567		-8.53235	-10.575	-7.8985
40.3	-14.6317	-17.5511	-12.0791	-16.9665		-8.92604	-10.7375	-8.19522	-10.6491
40.4	-15.1936	-17.7248	-12.0268	-18.033		-9.38672	-10.8888	-7.78196	-13.6542
40.5	-14.9715	-17.6051	-12.1046	-18.0717		-8.80716	-10.4901	-7.79185
40.6	-14.0618	-17.5827	-11.9982	-17.8624		-8.31513	-12.5269	-8.25517
40.7	-14.1008	-17.6512	-12.1419	-18.166		-8.85726	-12.0966	-8.07104
40.8	-13.2092	-17.6287	-11.745	-18.0844		-9.02289	-11.3005	-8.09266	-13.6542
40.9	-13.1844	-17.9015	-11.7399	-18.2233		-8.42731	-10.2577	-8.16054	-9.89513
41	-13.0298	-18.0461	-11.6048	-17.9214		-8.37887	-10.3844	-8.20595
41.1	-12.6557	-18.239	-11.4183	-18.2851		-8.42356	-10.3108	-8.32689
41.2	-12.7973	-18.2453	-11.076	-17.9666		-8.51065	-10.2083	-8.22
41.3	-12.681	-17.8016	-11.3657	-16.8382		-7.94124	-9.86305	-8.11757
41.4	-12.9383	-17.7297	-11.3743	-16.409		-8.51835	-10.9797	-8.36991
41.5	-13.4281	-17.7053	-11.7206	-16.1083		-9.23658	-10.5558	-7.98345	-12.8172
41.6	-12.9024	-17.5279	-11.7466	-16.4105		-9.55635	-10.4967	-8.07674	-11.3153
41.7	-13.3127	-17.8726	-11.7039	-16.4766		-8.79682	-9.9547	-7.80442	-12.2703
41.8	-12.9689	-18.0869	-11.4897	-16.0409		-8.7989	-10.4399	-7.86801
41.9	-13.3057	-18.2495	-11.3775	-16.4771		-8.90661	-10.6673	-8.0049
42	-14.0942	-18.2268	-11.3687	-16.4617		-8.90366	-11.5953	-8.02683	-12.8172
42.1	-14.5583	-18.0459	-11.7046	-16.1271		-8.42731	-10.8885	-7.68465	-11.3153
42.2	-15.1202	-18.0131	-11.6448	-16.6442		-8.37887	-11.0883	-7.95639	-12.2703
42.3	-14.8981	-17.7286	-11.7447	-17.3127		-8.60226	-10.5121	-8.11565
42.4	-13.9885	-17.4797	-11.4456	-18.2015		-8.41044	-10.9634	-7.78196
42.5	-14.0276	-17.231	-11.5098	-18.301		-7.64257	-9.59618	-7.79185	-10.6491
42.6	-13.136	-16.8281	-11.4528	-18.1753		-8.06754	-9.6801	-8.25517	-13.6542
42.7	-12.9815	-16.4881	-11.4543	-17.8277		-8.37409	-9.11974	-8.07104
42.8	-12.8424	-16.2718	-11.3383	-16.9206		-8.63707	-10.5106	-8.09266
42.9	-13.0105	-16.3542	-11.5337	-15.997		-8.90363	-9.59967	-8.16054
43	-13.3248	-16.5124	-11.7552	-15.7865		-9.31173	-9.4298	-8.20595	-13.6542
43.1	-13.5469	-16.2606	-11.6458	-16.0248		-8.90151	-9.61752	-8.32689	-9.89513
43.2	-13.5813	-16.2824	-11.4867	-16.2833		-8.82106	-10.8682	-8.22
43.3	-13.7693	-15.934	-11.6098	-17.0989		-8.90661	-11.4592	-8.11757
43.4	-13.7816	-15.4935	-11.7566	-17.9354		-8.90366	-11.1763	-8.36991
43.5	-13.4156	-15.1167	-11.6467	-18.0938		-8.42731	-10.792	-7.98345	-10.714
43.6	-12.9043	-15.0765	-11.509	-17.6474		-8.50132	-10.8108	-8.07674	-13.3309
43.7	-12.9832	-15.0504	-11.6806	-17.5228		-8.53917	-10.72	-7.80442	-10.6499
43.8	-12.9622	-15.142	-11.6769	-18.0419		-8.13431	-9.74588	-7.86801
43.9	-13.2797	-14.9727	-11.3981	-17.8741		-7.39091	-9.64757	-8.0049
44	-13.2424	-14.849	-11.0873	-16.8613		-7.67035	-9.71201	-8.02683	-11.4325
44.1	-12.7134	-14.5851	-10.9749	-16.4082		-8.05281	-11.2202	-7.68465	-12.8522
44.2	-13.2174	-14.2458	-11.3463	-16.1771		-8.4227	-10.2887	-7.95639	-10.8086
44.3	-12.8723	-13.942	-11.4078	-16.168		-8.42897	-10.0339	-8.11565	-13.1858
44.4	-13.2068	-13.6687	-11.2923	-16.7058		-8.95198	-10.4399	-7.78196	-10.7303
44.5	-13.992	-13.2496	-11.2822	-17.0428		-8.68351	-10.6673	-7.79185	-13.0742
44.6	-14.4518	-13.185	-10.9573	-16.9867		-8.30357	-11.5953	-8.25517	-10.6491
44.7	-15.0093	-13.0928	-11.0709	-16.4935		-8.03842	-10.8615	-8.07104	-13.6542
44.8	-14.7829	-12.8573	-11.174	-15.9411		-7.82135	-10.9232	-8.09266
44.9	-13.869	-12.3252	-11.3754	-16.1258		-7.58506	-10.888	-8.24201
45	-13.904	-11.8225	-11.6224	-16.3421		-7.12223	-11.1494	-8.28443
45.1	-12.9624	-11.5535	-11.7644	-16.4129		-7.37843	-9.59581	-8.13126	-13.6542
45.2	-12.812	-11.3071	-11.6099	-17.7873		-7.98656	-9.93817	-7.56049	-9.89513
45.3	-13.1027	-11.2423	-11.2565	-17.5675		-7.40494	-9.64467	-7.75992	-12.9655
45.4	-12.9042	-11.2571	-10.8513	-17.5958		-6.85474	-11.9419	-7.93653	-10.3272
45.5	-13.0446	-11.2056	-10.9733	-18.0703		-6.17986	-10.2386	-7.35057	-13.1989
45.6	-13.0746	-11.0364	-11.34	-18.0503		-5.66929	-10.2433	-7.64648	-10.714
45.7	-13.0454	-10.5441	-11.6864	-18.081		-5.19908	-10.1161	-7.80141
45.8	-13.0237	-10.034	-12.0179	-18.2246		-4.69611	-10.873	-7.86128
45.9	-12.9414	-9.62058	-12.2477	-18.5667		-5.23446	-8.90869	-7.54187
46	-12.6845	-9.44588	-11.858	-19.0493		-5.56469	-9.10875	-7.49377	-12.9655
46.1	-12.8058	-9.34109	-11.6535	-18.0155		-4.73354	-8.33446	-7.74266	-10.3272
46.2	-12.8537	-8.93858	-11.2692	-17.8645		-4.71065	-8.0976	-8.09466	-13.1989
46.3	-12.8771	-8.56678	-11.3896	-17.5185		-4.29617	-7.62396	-8.08767	-10.714
46.4	-13.1014	-8.26491	-11.723	-17.1231		-4.14249	-8.91282	-8.59225	-13.3309
46.5	-12.7206	-8.03227	-11.9996	-17.1542		-3.72995	-8.90898	-8.72668	-10.6499
46.6	-12.4979	-7.66775	-12.2694	-17.4744		-3.74096	-9.83133	-8.74353
46.7	-12.8371	-7.40224	-12.2718	-18.3661		-4.00674	-9.66129	-8.25102
46.8	-12.6127	-7.28793	-12.0332	-17.8904		-4.13928	-11.3583	-7.89665	-11.4325
46.9	-12.5393	-7.34749	-12.1239	-16.7183		-4.0915	-10.4833	-7.51163	-12.8522
47	-12.8628	-7.31139	-11.6108	-16.056		-4.77407	-9.85332	-7.18335	-10.8086
47.1	-12.9631	-7.30098	-11.7165	-15.9387		-4.6643	-10.4855	-7.0794	-13.1858
47.2	-13.0148	-7.23936	-11.4414	-16.4282		-3.95957	-11.6718	-6.99828	-10.7303
47.3	-12.9069	-7.05551	-11.2405	-16.944		-3.04058	-9.87532	-7.10486	-13.0742
47.4	-12.8625	-6.75787	-11.4155	-16.5621		-2.73782	-10.1302	-6.90823	-10.6491
47.5	-12.9459	-6.49232	-11.4273	-17.1877		-2.72605	-9.83315	-6.58861	-13.6542
47.6	-13.3961	-6.10892	-11.7745	-16.9899		-3.31023	-11.7984	-6.61942
47.7	-13.2004	-5.73422	-11.714	-16.5713		-3.2058	-10.2386	-6.67441
47.8	-14.2338	-5.54808	-11.8635	-15.9891		-3.82205	-10.2433	-6.42178	-13.1989
47.9	-14.459	-5.59715	-11.8502	-16.0355		-3.8182	-10.1161	-6.043	-10.714
48	-15.066	-5.62801	-11.5842	-16.047		-3.15855	-11.1303	-5.5028	-13.3309
48.1	-15.5112	-5.70695	-11.2751	-15.5033		-2.92185	-8.73717	-4.98501	-10.6499
48.2	-15.259	-5.46958	-11.5648	-14.7948		-2.52418	-8.63096	-4.21503
48.3	-15.1255	-5.47962	-11.8183	-14.8143		-3.12715	-7.67291	-3.68189
48.4	-15.5879	-5.45061	-12.0038	-14.8437		-3.51002	-8.71131	-3.53259	-11.4325
48.5	-14.1828	-4.96701	-11.9397	-15.6799		-3.10936	-6.19696	-3.66322	-12.8522
48.6	-14.2823	-4.68306	-12.1505	-15.9102		-3.2558	-5.9883	-3.44715	-10.8086
48.7	-13.4905	-4.51602	-11.8974	-16.5527		-3.20414	-5.71479	-3.28215	-13.1858
48.8	-13.2805	-4.31331	-11.675	-16.2323		-2.65677	-6.2965	-3.58991	-10.7303
48.9	-12.4134	-4.33135	-11.3672	-15.3923		-2.26565	-4.56097	-3.42758	-13.0742
49	-11.7458	-4.06924	-11.4462	-14.5549		-1.52539	-3.73456	-3.14623	-10.6491
49.1	-12.0845	-4.20148	-11.4911	-13.9276		-1.56999	-3.53228	-2.97724
49.2	-12.1307	-4.25088	-11.1381	-13.5523		-1.3542	-4.29687	-2.64036
49.3	-11.9666	-3.93989	-11.0816	-14.1653		-1.5204	-2.85209	-2.52561
49.4	-12.3878	-3.7699	-11.225	-14.4428		-1.34198	-2.16548	-2.23068
49.5	-13.2582	-3.38507	-11.1195	-15.0223		-1.78681	-2.57857	-2.05385
49.6	-12.847	-3.08343	-11.3462	-15.2009		-1.48485	-2.60956	-2.21232
49.7	-12.5299	-3.04111	-11.6493	-15.1267		-1.27642	-2.9845	-1.88271
49.8	-12.3844	-2.7349	-11.7903	-14.315		-0.886866	-1.3787	-1.657	-12.8172
49.9	-12.193	-2.67674	-11.6253	-14.1713		-0.314118	-1.60548	-1.59128	-11.3153
50	-12.0909	-2.69436	-11.1269	-13.7792		-0.915331	-1.17075	-1.81739	-12.2703
50.1	-12.7074	-2.78108	-10.6581	-13.5933		-1.00761	-1.7581	-2.03056	-11.9365
50.2	-12.1417	-2.77409	-10.8015	-13.311		-1.17918	-0.00262885	-2.28957	-10.2962
50.3	-13.1551	-2.59857	-10.4021	-12.6665		-1.394	-0.59911	-2.44057	-11.0247
50.4	-12.4242	-2.35887	-10.8339	-12.8713		-1.20531	-0.328058	-2.2816	-10.0375
50.5	-13.0792	-2.3705	-11.1751	-12.237		-1.42563	-1.57863	-1.80241	-11.0989
50.6	-13.1113	-2.06415	-11.2703	-12.0735		-1.81517	0.0180141	-1.36954	-10.0432
50.7	-12.1199	-2.03013	-11.3613	-11.9262		-1.82169	0.0742214	-0.933324	-10.6004
50.8	-11.4883	-1.88706	-11.4291	-12.5521		-2.2006	0.193902	-0.870613	-8.28899
50.9	-11.5024	-1.76191	-11.2854	-12.8012		-1.61557	-1.50211	-0.736185	-10.1537
51	-10.1235	-1.7353	-11.4009	-12.7329		-1.39174	0.163054	-1.07206	-9.75641
51.1	-10.3588	-1.87855	-11.2522	-12.2082		-0.506523	0.627295	-1.35025	-9.80184
51.2	-9.35007	-1.73058	-11.3114	-11.6084		0.0615499	0.168642	-1.56652	-8.14035
51.3	-9.84175	-1.98231	-10.8223	-11.2962		0.241764	-0.552628	-1.88551	-10.3163
51.4	-10.0738	-2.0215	-10.3438	-11.6321		-0.225825	0.144318	-1.92209	-7.56306
51.5	-9.66821	-2.07396	-10.086	-11.3089		-0.700279	0.808535	-2.27791	-8.74298
51.6	-9.67039	-1.9078	-9.99028	-11.1741		-0.659189	0.132862	-1.89709	-6.13954
51.7	-10.4374	-1.5122	-9.77204	-11.0259		-0.398969	-0.794622	-1.7851	-9.23441
51.8	-11.0013	-1.39658	-9.49506	-10.6768		-0.582667	0.870029	-1.66977	-5.9126
51.9	-12.3712	-1.33761	-9.71735	-10.266		-0.418108	1.67888	-1.56895	-8.40342
52	-12.1283	-0.88376	-9.74817	-9.61833		-0.253447	1.16846	-1.55939	-6.20537
52.1	-12.5513	-0.698998	-9.41734	-9.82336		-0.17046	-0.259469	-1.719	-7.89451
52.2	-12.481	-0.434791	-8.94942	-9.54581		-0.598927	0.633723	-1.60354	-4.76411
52.3	-12.0557	-0.580382	-8.80395	-9.94171		-0.966016	1.08129	-1.56949	-8.00224
52.4	-10.6122	-0.615878	-8.86523	-9.54557		-1.01724	0.435859	-1.2371	-5.67284
52.5	-9.8165	-0.564267	-8.58466	-9.88924		-0.629946	-0.743724	-1.61558	-7.9891
52.6	-9.87028	-0.585438	-8.4	-10.0894		-1.04517	1.23812	-2.07174	-4.80899
52.7	-10.0133	-0.744966	-8.37494	-9.98933		-0.683131	1.17563	-2.47375	-8.32203
52.8	-9.90153	-0.884493	-8.22108	-9.60642		-0.668829	1.39261	-2.7804	-5.26899
52.9	-10.2115	-0.947175	-7.73583	-9.08348		-0.34649	-0.873191	-2.73422	-7.46196
53	-10.3833	-0.80661	-7.55046	-8.16042		-0.399033	0.946137	-2.55583	-4.61602
53.1	-10.897	-0.924749	-7.53088	-8.22471		-0.420934	0.827172	-1.80172	-6.71484
53.2	-11.1975	-0.69969	-7.42853	-8.14288		-0.492474	0.621108	-1.4042	-5.49686
53.3	-11.4667	-0.527888	-7.07504	-8.23094		-0.239556	-0.952054	-1.21194	-5.16039
53.4	-10.7647	-0.360572	-6.95966	-8.60071		-0.964791	1.04272	-1.29791	-5.99498
53.5	-9.96696	-0.704566	-6.46324	-8.44629		-1.03277	0.567668	-1.32715	-4.52614
53.6	-9.78959	-1.0226	-6.11765	-7.60069		-1.60666	0.815955	-1.46527	-5.13646
53.7	-8.75336	-1.03867	-5.91722	-7.19868		-1.2805	-1.24277	-1.79846	-4.20084
53.8	-8.27843	-0.943911	-5.88432	-6.374		-1.28942	1.17145	-1.96526	-5.30178
53.9	-8.53194	-0.984549	-5.58148	-6.18752		-0.470557	0.680415	-1.5984	-3.4234
54	-8.64928	-0.772995	-5.40448	-6.5113		-0.25623	0.694747	-1.38249	-4.88089
54.1	-8.70587	-0.510294	-5.08982	-6.27185		0.518945	-0.457504	-1.19399	-3.52121
54.2	-7.32089	-0.213103	-5.12173	-6.95533		0.897282	0.929797	-1.07827	-5.26112
54.3	-6.79818	-0.308693	-4.86182	-7.80197		0.620846	1.46904	-1.17163	-3.30463
54.4	-7.09582	-0.19571	-4.62609	-7.69636		-0.10181	1.40538	-1.15226	-5.4826
54.5	-6.79422	0.0147153	-4.81894	-7.92489		-0.751474	0.0328132	-1.47608	-2.66951
54.6	-7.72208	-0.23054	-4.70193	-7.67562		-1.24166	1.51454	-1.16077	-4.21317
54.7	-8.03496	-0.410982	-4.72024	-8.04529		-0.823492	1.42144	-0.913203	-3.23341
54.8	-8.72325	-0.663699	-4.6312	-7.83577		-0.748854	1.14804	-0.776101	-6.03447
54.9	-9.39327	-0.581529	-4.27804	-6.56534		-0.32203	0.0423742	-0.48561	-2.57535
55	-8.26082	-0.598802	-3.85352	-6.1896		0.639677	0.241168	-0.289399	-5.46958
55.1	-8.28209	-0.629423	-3.48907	-5.9172		0.861946	1.3781	-0.301113	-1.9483
55.2	-8.16463	-0.446888	-3.3092	-5.66507		0.817639	0.474636	-0.006891	-5.37406
55.3	-7.65652	-0.109486	-3.07519	-5.02426		0.765821	0.148706	-0.158967	-2.25395
55.4	-7.19841	-0.00616268	-2.73167	-4.94886		0.448778	-0.744758	-0.212689	-5.56851
55.5	-6.19531	0.120608	-2.84336	-5.52375		0.247236	0.422018	-0.698502	-1.93509
55.6	-5.67837	-0.00320917	-2.57026	-5.5651		0.107143	0.150129	-1.0021	-4.50922
55.7	-5.74654	-0.0262378	-2.31828	-5.1671		-0.544677	-0.0180436	-0.844288	-2.62432
55.8	-5.66871	-0.368215	-1.84453	-5.22505		-0.375483	-0.19862	-1.0307	-4.808
55.9	-6.76465	-0.425581	-2.00071	-4.93937		-0.724642	1.32495	-0.633106	-1.82246
56	-7.86027	-0.392704	-2.08821	-5.49368		-0.403195	1.63125	-0.311625	-4.40601
56.1	-8.48096	-0.123884	-1.74533	-5.77348		0.35754	1.48545	-0.352841	-3.01131
56.2	-9.07348	-0.13545	-1.56815	-6.32435		0.602496	-0.10641	-0.11797	-2.99401
56.3	-7.88028	-0.164971	-1.77734	-6.69514		0.900974	1.24545	-0.15753	-3.4242
56.4	-5.96533	-0.0701435	-1.56759	-6.53502		1.70714	1.25815	0.0190166	-2.62067
56.5	-5.77831	-0.355927	-1.6312	-6.03881		1.20718	0.997771	0.192515	-2.96469
56.6	-5.0805	-0.349891	-1.54261	-4.91633		0.136521	0.416665	0.304231	-2.45783
56.7	-5.32866	-0.418789	-1.45638	-4.05992		-0.349738	0.20827	0.586011	-3.94867
56.8	-5.86319	-0.512099	-1.29189	-3.59625		-0.343589	0.621208	0.342219	-2.57244
56.9	-6.13912	-0.547583	-1.08229	-3.63666		-0.13102	0.798832	-0.0353748	-3.89791
57	-7.29469	-0.859707	-1.04635	-3.56398		0.249412	0.359157	0.0940465	-2.10686
57.1	-6.44077	-0.952136	-1.13964	-4.13669		0.545565	0.453693	-0.120059	-3.09047
57.2	-5.50989	-0.655759	-1.03484	-4.13637		1.09268	1.14423	0.0214214	-1.93268
57.3	-5.78775	-0.675622	-0.876242	-4.53824		0.429888	1.61203	0.198824	-4.0848
57.4	-5.68411	-0.377694	-0.741846	-4.37184		-0.141295	1.14804	0.512111	-1.84552
57.5	-5.72895	-0.281845	-0.524868	-4.40108		0.0404564	0.0423742	0.269515	-3.55208
57.6	-4.95073	-0.333655	-0.435234	-3.89315		-0.720537	0.241168	0.0960595	-2.85113
57.7	-5.29173	-0.450687	-0.306999	-4.08155		-0.567209	1.3781	-0.382168	-3.1907
57.8	-6.49631	-0.71063	-0.460978	-3.88635		0.100326	0.474636	-0.192087	-1.63247
57.9	-6.33672	-0.983891	-0.642751	-3.95831		-0.180188	0.148706	-0.50387	-3.16888
58	-6.49772	-0.90876	-0.354134	-4.49389		-0.455787	-0.744758	-0.413145	-1.73903
58.1	-7.05001	-0.743337	-0.0110737	-4.17608		-0.878717	0.422018	-0.300342	-4.57083
58.2	-7.0676	-0.482256	-0.0187224	-3.17911		-1.01132	0.150129	0.0858885	-0.926815
58.3	-6.27547	-0.371197	0.214628	-2.23267		-0.823492	-0.0180436	0.372077	-3.90944
58.4	-5.69964	-0.29587	0.558191	-2.01315		-0.748854	-0.19862	0.379167	-1.36295
58.5	-6.19022	-0.301323	0.773538	-2.50893		-0.32203	1.32495	0.628001	-4.07333
58.6	-5.23285	-0.275296	0.50242	-2.619		0.639677	1.63125	0.617688	-0.928116
58.7	-4.26174	-0.438085	0.307213	-2.67683		0.861946	1.48545	0.313732	-3.58419
58.8	-3.21457	-0.618278	0.432751	-3.40315		0.817639	-0.10641	0.163935	-0.891234
58.9	-2.68856	-0.599683	0.638987	-2.77365		0.765821	1.24545	0.178278	-4.46341
59	-1.82896	-0.560641	0.627849	-2.23724		0.448778	1.25815	0.160947	-2.08684
59.1	-1.71264	-0.562165	1.01381	-2.37606		0.247236	0.997771	0.29503	-3.86921
59.2	-2.55387	-0.364952	1.12671	-2.93428		0.107143	0.509126	0.0554425	-3.17216
59.3	-2.73521	-0.287943	0.927593	-2.97024		-0.544677	0.587995	0.530603	-1.94303
59.4	-2.3342	-0.218617	0.384124	-2.76421		-0.375483	0.180865	0.273512	-2.96376
59.5	-3.21266	-0.113646	0.138476	-2.6398		-0.724642	-0.747873	0.532079	-1.76736
59.6	-3.35248	-0.0187581	0.067615	-2.32398		-0.403195	-0.409115	0.709529	-3.76122
59.7	-4.05852	-0.0354634	0.59139	-1.50503		0.35754	-0.156904	0.632002	-1.88959
59.8	-4.57011	-0.0150234	0.812984	-1.30556		0.602496	0.502766	0.411305	-3.05532
59.9	-5.29224	0.000797421	1.37467	-1.96474		0.900974	-0.59442	0.298678	-1.5972
60	-5.15822	-0.0263749	1.31007	-2.31581		1.70714	0.422018	0.0397622	-3.43251
60.1	-4.80622	-0.163712	1.17459	-2.64611		1.20718	0.150129	0.152753	-1.82693
60.2	-4.45168		1.05361	-2.3815		0.136521	-0.0180436	-0.0271419	-2.74309
60.3	-3.73465		1.21572	-2.10376		-0.349738	-0.19862	0.183361	-1.44335
60.4	-3.6954		1.0367	-1.72961		-0.343589	1.32495	0.0496014	-2.98689
60.5	-3.53042		1.30858	-1.28957		-0.13102	1.63125	-0.0858837	-1.06269
60.6	-4.30689		1.43453	-1.82408		0.249412	1.48545	0.532946	-3.826
60.7	-4.6944		1.63337	-2.40858		0.545565	-0.10641	0.358373	-1.41818
60.8	-4.39585		1.37107	-2.48444		1.09268	1.24545	0.294262	-3.79668
60.9	-4.96749		1.4121	-2.43322		0.429888	1.25815	0.501213	-0.821685
61	-4.75153		1.62134	-1.64975		-0.141295	0.997771	0.529588	-3.65994
61.1	-3.88874		1.77212	-0.862814		0.242473	0.416665	0.330555	-0.441892
61.2	-3.7291		1.69139	-0.58206		-0.581719	0.20827	0.134718	-3.83226
61.3	-3.30524		1.84686	-0.631225		-1.46307	0.621208	0.0554425	0.167563
61.4	-4.88502		1.89096	-1.4584		-0.95484	0.798832	0.530603	-3.78825
61.5	-4.80192		1.85283	-1.84127		-0.861092	0.359157	0.273512	-0.279176
61.6	-4.81924		1.55347	-2.09034		-0.389953	0.453693	0.532079	-3.95952
61.7	-4.602		1.6306	-2.02195		0.260156	1.14423	0.709529	-1.48829
61.8	-3.45158		1.37495	-2.04357		0.694965	1.61203	0.632002	-3.75881
61.9	-2.65345		1.4689	-1.59535		1.09268	1.14804	0.411305	-0.376186
62	-2.76693		1.77205	-1.01881		0.429888	0.0423742	0.298678	-3.83301
62.1	-3.28189		1.80536	-0.287495		-0.141295	0.241168	0.0397622	-1.72583
62.2	-4.08067		1.88298	-0.4226		0.0404564	1.3781	0.152753	-2.11436
62.3	-4.22922		1.74519	-0.648086		-0.720537	0.474636	-0.0271419	-1.67617
62.4	-4.39055		1.7443	-1.38316		-0.567209	-0.591171	0.183361	-1.32601
62.5	-4.80134		1.92554	-1.30117		0.100326	0.395999	0.0496014	-2.04964
62.6	-4.19373		1.64638	-0.882266		-0.180188	1.35221	-0.0236255	-0.942311
62.7	-3.88753		1.88298	-0.731011		-0.455787	0.830322	0.298587	-1.92294
62.8	-5.45831		1.74519	-0.850625		-0.878717	0.103189	0.355192	-0.920802
62.9	-5.41357		1.7443	-0.290348		-1.01132	0.557977	0.564929	-2.16283
63	-4.43362		1.92554	-0.322408		-0.823492	1.63988	0.747399	-0.734036
63.1	-3.92593		1.64638	-0.354463		-0.748854	0.977809	0.827742	-2.57988
63.2	-3.06842		1.88298	0.102042		-0.32203	0.509126	0.851446	-0.762116
63.3	-3.20786		1.74519	0.0719786		0.639677	0.587995	0.471193	-2.36057
63.4	-2.05757		1.83518	0.638047		0.861946	0.180865	0.411305	-1.28398
63.5	-1.32492		1.69476	0.266834		0.817639	-0.747873	0.298678	-2.02448
63.6	-2.67634		1.59475	-0.104979		0.765821	-0.409115	0.0397622	-0.64961
63.7	-1.77894		1.94483	-0.0256302		0.448778	-0.156904	0.152753	-3.17954
63.8	-1.49505		2.02643	-0.672582		0.247236	0.502766	-0.0271419	-1.51557
63.9	-0.814102		2.04128	-0.94438		0.107143	-0.59442	0.183361	-2.93054
64	-1.21915		1.82574	-0.781289		-0.544677	0.422018	0.0496014	-0.238265
64.1	-0.539733		1.65059	-1.76078		-0.375483	0.150129	-0.0858837	-2.4114
64.2	-0.574198		1.92554	-1.4538		-0.724642	-0.0180436	0.532946	-0.0161662
64.3	-1.00616		1.64638	-1.44441		-0.403195	-0.19862	0.358373	-2.70007
64.4	-2.3182		1.88298	-0.81422		0.35754	1.32495	0.294262	-0.220227
64.5	-2.62526		1.74519	-0.407135		0.602496	1.63125	0.501213	-2.80458
64.6	-2.81469		1.7443	-0.429884		0.900974	1.48545	0.529588	-0.381765
64.7	-2.5399		1.92554	-0.453423		1.70132	-0.10641	0.330555	-3.55791
64.8	-2.1245		1.64638	-1.04035		1.32196	1.24545	0.134718	-0.629836
64.9	-0.72403		1.88298	-0.320381		0.42073	1.25815	0.0554425	-3.36556
65	-0.0838468		1.74519	-0.0206246		-0.891394	0.997771	0.530603	-0.0651358
65.1	0.0395211		1.83518	0.474953		-1.27764	0.416665	0.273512	-3.31647
65.2	-0.111398		1.69476	1.03292		-0.916944	0.20827	0.532079	-2.48709
65.3	-0.170056		1.59475	0.802225		-0.57101	0.621208	0.709529	-1.03616
65.4	-0.203228		1.94483	0.563223		-0.389985	0.798832	0.632002	-1.71863
65.5	-1.5903		2.02643	-0.0090797		0.639677	0.359157	0.411305	-1.14898
65.6	-1.37512		2.04128	-0.0212581		0.861946	0.453693	0.298678	-2.70565
65.7	-1.14602		1.82574	0.840215		0.817639	1.14423	0.0397622	-0.329696
65.8	-0.14404		1.65059	0.246065		0.765821	1.61203	0.14339	-2.3566
65.9	0.0440092		1.92554	0.345961		0.448778	1.3682	0.0567554	-1.49939
66	0.103703		1.64638	0.474892		0.247236	0.0234794	0.0485608	-3.38955
66.1	-0.13763		1.88298	0.482517		0.107143	-0.35248	0.100947	-1.59472
66.2	0.1178		1.74519	0.26344		-0.544677	0.217558	0.0175406	-3.37517
66.3	-0.66569		1.7443	0.995343		-0.375483	0.236003	0.0976622
66.4	-0.545682		1.92554	1.5138		-0.724642	-0.200453	0.162917
66.5	-0.661488		1.64638	0.351592		-0.403195	0.162703	0.00615286
66.6	-0.254285		1.78842	-0.6905		0.35754	0.59892	0.183361
66.7	-0.199858		1.99649	-1.22361		0.602496	1.3781	0.0496014	-0.324923
66.8	-0.274865		1.697	-0.981657		0.900974	0.474636	-0.0858837	1.63708
66.9	-0.493674		1.81117	-0.121461		1.29838	-0.591171	0.532946	-0.107721
67	0.66041		1.73381	0.971094		1.51223	0.395999	0.358373	1.35796
67.1	1.26069		1.83727	2.50837		1.1443	1.35221	0.294262	-0.484477
67.2	0.382364		2.00677	2.17693		0.47865	0.830322	0.501213	1.43333
67.3	-0.380369		1.66871	1.02924		0.272959	0.103189	0.529588	0.194217
67.4	-1.64844		1.83518	0.306357		0.253837	0.557977	0.330555	1.75288
67.5	-3.02276		1.69476	-0.31411		-0.10529	1.63988	0.134718	-0.903384
67.6	-2.73053		1.59475	-0.218744		-0.720657	0.977809	0.0554425	2.66879
67.7	-2.82649		1.94483	-0.646013		-0.567209	0.509126	0.530603	-0.763231
67.8	-2.47037		2.02643	-0.253055		0.100326	0.587995	0.273512	1.85906
67.9	-1.60549		2.04128	-0.0956439		-0.180188	0.180865	0.532079	-1.27636
68	-1.27885		1.82574	-0.3335		-0.455787	-0.747873	0.709529	2.06442
68.1	-1.02943		1.65059	-0.651968		-0.878717	-0.409115	0.632002	-0.658536
68.2	-1.4954		1.92554	-0.255804		-1.01132	-0.156904	0.411305	1.26448
68.3	-2.05128		1.64638	0.675815		-0.823492	0.502766	0.298678	-0.732238
68.4	-1.67423		1.88298	1.70003		-0.748854	-0.59442	0.0219623	2.00727
68.5	-1.53093		1.74519	1.98123		-0.32203	0.422018	0.13323	-0.760194
68.6	-1.41989		1.74062	1.82741		0.639677	0.150129	0.0233308	2.0925
68.7	-0.671276		1.94607	1.03947		0.861946	-0.0180436	0.121078	-1.15945
68.8	-0.629793		1.54745	1.31399		0.800514	-0.19862	0.519207	2.06678
68.9	-0.914282		1.83046	1.21208		0.63837	1.32495	0.285577	-0.238885
69	-0.395398		2.11386	1.19338		0.524645	1.63125	0.404207	0.614426
69.1	0.79029		1.99558	1.34738		0.649259	1.48545	0.461138	1.0386
69.2	0.779985		2.08732	1.80211			-0.10641	0.529588	0.231285
69.3	1.37839		1.575	1.33727			1.24545	0.330555	1.00879
69.4	1.88812		1.83518	0.223614			1.25815	0.134718	0.0419775
69.5	1.91196		1.69476	-0.381318			0.997771	0.0554425	1.12817
69.6	-0.0731273		1.59475	-0.23955			0.416665	0.530603	0.00869055
69.7	-1.05151		1.94483	0.0965012			0.20827	0.273512	1.10294
69.8	-1.23506		2.02643	0.762333			0.351811	0.532079	-0.323869
69.9	-0.338322		2.04128	1.53811			0.316902	0.709529	1.29628
70	-0.11212		1.82574	1.84142			0.877596	0.634186	0.149649
70.1	0.824175		1.65059	1.27711			2.5671	0.413585	1.73509
70.2	1.7275		1.92554	1.92035				0.322841	-0.136173
70.3	1.46792		1.64638	1.76757				0.0936978	1.77507
70.4	1.24509		1.88298	0.932129				0.0126328	0.011356
70.5	0.978832		1.93346	1.70129				-0.172727	1.68265
70.6	0.108848		1.5214	1.81929					-0.831727
70.7	-0.657606		1.56802	2.43722					1.8647
70.8	-1.48741		1.46815	2.02					-0.42373
70.9	-1.50579		1.67061	1.02759					2.12814
71	-1.69227		1.7621	0.966414					-0.899107
71.1	-1.66564		1.64587	0.108962					1.65642
71.2	0.0352342		1.63509	-0.314992					-0.0954473
71.3	0.491702			0.123241					2.05692
71.4	0.0753711			-0.958373					-0.59314
71.5	0.0292408			-1.18223					2.0643
71.6	-0.258817			-0.908538					-1.42903
71.7	-0.283344			-1.01129					2.32018
71.8	-0.514606			-1.03083					-0.998657
71.9	-0.811053			-0.877697					2.24989
72	-0.882872			-0.423848					-0.389513
72.1	-1.0705			-0.889562					2.17842
72.2	-1.61104			-2.00408					-0.688475
72.3	-1.24109			-2.60986					1.6356
72.4	-0.473771			-2.46894					-0.298392
72.5	1.21452			-2.13376					0.330836
72.6	2.26357			-1.46878					1.65562
72.7	2.76404			-0.693851					-0.617872
72.8	3.01488			-0.39142					1.1164
72.9	3.42481			-0.956589					-0.386104
73	3.32068			-0.314184					0.532913
73.1	2.27207			-0.467743					0.864977
73.2	1.39889			-1.3041					0.943576
73.3	0.76945			-0.53597					-0.470468
73.4	-0.500851			-0.419015					1.34885
73.5	-1.14969			-0.365747					-0.729697
73.6	-1.19741			-0.454056					1.33887
73.7	-0.584778			-0.0299652					-0.549005
73.8				1.14015					1.71395
73.9									-0.528611

## Sheet: Fig 3f
F181_Ixo	F181_ACh	F181_Arec	F181_Pilo		F188_Ixo	F188_ACh	F188_Arec	F188_Pilo
221090	203.399	34.8121	13.5484		-16.4415	20.3933	75.8902	82.6976
214396	286.62	122.706	-25.7839		-6.17915	2.09149	146.472	108.156
197263	118.988	167.32	6.00294		39.6494	25.37	62.9082	24.8203
232348	288.332	187.096	-11.7215		15.3989	11.4222	51.8727	-12.8057
229372	361.984	208.305	18.4053		58.6233	2.1717	65.2267	89.6264
162491	379.717	144.312	-3.90442		61.9104	2.33302	73.6801	-14.7517
179357	392.565	163.33	-37.2822		54.4675	-23.8721	40.8515	93.367
161070	312.305	152.317	-12.0451		88.5684	18.2059	87.5404	68.2941
144931	348.058	135.654	-13.869		33.9641	52.9619	-61.4216	47.5253
176820	297.175	270.776	-32.1944		57.5739	103.812	-85.611	67.9498
214596	323.118	198.928	-57.8663		99.6466	28.4902	-73.2086	75.2662
165398	256.61	260.554	-41.4202		136.929	-19.3272	-80.7054	48.6926
139582	226.593	285.22	-17.7703		80.4873	163.048	-56.8892	24.9473
176221	204.134	279.991	-53.6352		-51.0701	87.3565		3.34805
253818	270.681	293.055	-53.8194		83.5106	37.3405		91.1657
127973	142.292	226.501	118.669		34.6023	22.6113		98.1792
238414	207.906	233.802	126.691			59.7439		110.773
303364	253.158	205.588	141.097			-6.78407
146739	246.174	224.66	147.822			36.8078
53363	170.327	165.843	137.923			66.7701
241780	265.656	216.734				152.261
53592.8	198.098	128.826				41.1627
71674.2	346.388	218.436				-3.34669
145964	311.601	146.393				31.3381
103475	165.151	53.2724				124.906
113700	231.668	107.737				99.1909
96395	243.222	141.663
71194.6	246.518	137.256
58571.2	282.403	102.719
	297.231	181.88
	278.505	96.9672
	361.159	212.384
	278.32	135.802
	302.819	72.6363
	285.965
	275.541
	251.794
	340.231
	368.733
	378.799
	323.716

## Sheet: Fig 3f - Statistics
	F181-Ixo			F181-ACh			F181-Arec			F181-Pilo
	Unpaired t test with Welch's correction			Unpaired t test with Welch's correction			Unpaired t test with Welch's correction			Unpaired t test with Welch's correction
	P value	<0.0001		P value	<0.0001		P value	<0.0001		P value	0.3176
	P value summary	****		P value summary	****		P value summary	****		P value summary	ns
	Significantly different (P < 0.05)?	Yes		Significantly different (P < 0.05)?	Yes		Significantly different (P < 0.05)?	Yes		Significantly different (P < 0.05)?	No
	One- or two-tailed P value?	Two-tailed		One- or two-tailed P value?	Two-tailed		One- or two-tailed P value?	Two-tailed		One- or two-tailed P value?	Two-tailed
	Welch-corrected t, df	t=13.10, df=28.01		Welch-corrected t, df	t=24.71, df=52.61		Welch-corrected t, df	t=10.16, df=31.07		Welch-corrected t, df	t=1.022, df=22.94
	How large is the effect?			How big is the difference?			How big is the difference?			How big is the difference?
	Mean of column E	-8.1		Mean of column E	-22.06		Mean of column E	-15.95		Mean of column E	-11.15
	Mean of column F	0.00323		Mean of column F	-5.864		Mean of column F	-5.823		Mean of column F	-9.496
	Difference between means (F - E) ± SEM	8.103 ± 0.6185		Difference between means (F - E) ± SEM	16.20 ± 0.6555		Difference between means (F - E) ± SEM	10.13 ± 0.9969		Difference between means (F - E) ± SEM	1.656 ± 1.621
	95% confidence interval	6.836 to 9.370		95% confidence interval	14.88 to 17.51		95% confidence interval	8.094 to 12.16		95% confidence interval	-1.698 to 5.010
	R squared (eta squared)	0.8597		R squared (eta squared)	0.9207		R squared (eta squared)	0.7686		R squared (eta squared)	0.04354
	F188-Ixo			F188-ACh			F188-Arec			F188-Pilo
	Unpaired t test with Welch's correction			Unpaired t test with Welch's correction			Unpaired t test with Welch's correction			Unpaired t test with Welch's correction
	P value	0.0028		P value	0.0003		P value	0.4122		P value	<0.0001
	P value summary	**		P value summary	***		P value summary	ns		P value summary	****
	Significantly different (P < 0.05)?	Yes		Significantly different (P < 0.05)?	Yes		Significantly different (P < 0.05)?	No		Significantly different (P < 0.05)?	Yes
	One- or two-tailed P value?	Two-tailed		One- or two-tailed P value?	Two-tailed		One- or two-tailed P value?	Two-tailed		One- or two-tailed P value?	Two-tailed
	Welch-corrected t, df	t=3.258, df=29.81		Welch-corrected t, df	t=3.983, df=36.84		Welch-corrected t, df	t=0.8465, df=13.29		Welch-corrected t, df	t=5.025, df=28.52
	How big is the difference?			How big is the difference?			How large is the effect?			How big is the difference?
	Mean of column G	-12.47		Mean of column G	-15.95		Mean of column G	-7.993		Mean of column G	-17.3
	Mean of column H	-8.415		Mean of column H	-11.1		Mean of column H	-6.719		Mean of column H	-10.86
	Difference between means (H - G) ± SEM	4.058 ± 1.245		Difference between means (H - G) ± SEM	4.850 ± 1.218		Difference between means (H - G) ± SEM	1.275 ± 1.506		Difference between means (H - G) ± SEM	6.436 ± 1.281
	95% confidence interval	1.514 to 6.602		95% confidence interval	2.383 to 7.317		95% confidence interval	-1.971 to 4.520		95% confidence interval	3.814 to 9.057
	R squared (eta squared)	0.2626		R squared (eta squared)	0.301		R squared (eta squared)	0.05117		R squared (eta squared)	0.4696

## Sheet: Fig 3g
Time (s)	T84_Ixo_GoA	T84_ACh_GoA	T84_Arec_GoA	T84_Pilo_GoA		T84_Ixo_endo	T84_ACh_endo	T84_Arec_endo	T84_Pilo_endo
0	0.628249	0.659684	0.153935	0.343628		0.33212	0.233596	-0.245514	0.397381
0.1	-0.0082644	0.0736451	0.0512063	0.254879		-1.28884	-0.114029	0.265561	0.34373
0.2	-0.289096	0.0259929	0.140657	0.591931		1.22316	0.309798	-0.367801	0.0888456
0.3	-0.331706	-0.0244519	-0.00300877	0.732782		1.34288	-0.161906	-0.80531	0.0282932
0.4	-0.0425568	-0.159533	-0.26339	0.0926467		-1.48772	0.115146	0.258842	0.193712
0.5	0.0948196	-0.137587	-0.22141	-0.0296933		0.22032	0.10633	0.18175	0.264575
0.6	-0.286539	-0.101212	-0.371256	-0.782472		0.642119	-0.16518	-0.801932	-0.000419494
0.7	-0.356485	-0.124531	-0.145932	-1.63404		-1.68837	-0.297028	0.586746	-0.275022
0.8	-0.185942	0.170715	0.212537	-1.43178		-0.375132	0.425499	0.252474	-0.305996
0.9	0.0693319	0.115177	-0.133584	-0.770475		1.07947	-0.452226	-0.855189	-0.453503
1	0.544633	-0.763751	-0.772175	-0.824199		-1.64104	0.00381012	0.02748	-0.0857436
1.1	0.507584	-1.12344	-0.997757	-0.142902		0.139901	0.0419986	-0.104922	0.381682
1.2	0.301665	-1.93506	-1.19998	0.26703		1.22738	0.311631	-0.93864	0.403734
1.3	0.77404	-1.15793	-0.829067	0.5746		-0.840728	-0.0473843	-0.618077	0.325792
1.4	0.721648	-0.224461	-0.602296	0.249614		0.0131221	-0.103205	-0.192957	0.338353
1.5	0.836834	0.383732	-1.14083	0.0284824		1.70715	0.750079	-0.467981	-0.0483129
1.6	1.0776	0.499745	-1.26673	-0.496522		-1.21725	-0.0403576	-0.351954	-0.14825
1.7	1.03156	0.0940326	-0.25509	-1.02416		-0.622823	-0.369303	0.508658	-0.172887
1.8	0.742449	-0.724948	-0.18159	-0.914276		1.18028	0.0346664	0.261916	-0.394047
1.9	0.868951	-0.603917	0.00335069	-0.188262		-0.418701	0.207366	-0.614488	-0.297339
2	0.595966	-0.604644	-0.436128	-0.0843095		0.595987	-0.365156	0.467667	-0.392224
2.1	0.735563	-1.21393	-1.36125	0.481896		0.47889	-0.0411869	0.456634	-0.401877
2.2	0.944727	-1.68416	-1.1705	1.14726		-1.51312	0.11436	-0.385494	-0.387249
2.3	0.831702	-1.5856	-0.616157	-0.156624		0.0321447	-0.348092	0.565783	-0.337589
2.4	0.832053	-0.614328	-0.752481	-0.727395		0.96368	-0.390164	0.587635	-0.398921
2.5	1.0065	-0.354098	-0.382482	-0.7915		-1.80216	-0.582896	-0.67494	-0.136975
2.6	0.958639	-0.113287	-0.890656	-0.689897		0.42279	0.543687	0.653268	-0.12047
2.7	1.29779	-0.12551	-1.11039	-0.41919		0.999618	-0.501369	0.552141	0.185298
2.8	1.44067	-0.405045	-0.704987	-0.0622836		-1.06917	-0.658051	-0.532055	0.346416
2.9	1.36102	-0.177783	-0.720811	-0.4151		0.931331	-0.405527	0.39143	0.343094
3	1.20694	-0.384716	-0.373384	-0.262862		0.243899	-0.519787	0.120083	0.308035
3.1	0.996127	-1.48733	0.0755498	-0.671961		-1.46215	0.269777	-0.656734	0.257405
3.2	0.789678	-1.72595	-0.127159	-0.390462		0.411514	-0.419319	0.246776	0.292476
3.3	0.548906	-0.432892	0.140553	-0.490161		0.519726	-0.493644	0.375581	0.559655
3.4	0.406731	0.108425	0.0138152	-0.670295		-2.15306	-0.343989	-0.126392	0.445715
3.5	0.335985	0.462521	-0.462435	-0.492268		0.510442	0.111349	-0.318781	0.0236733
3.6	0.0111794	0.298906	-0.949573	-0.96444		0.6739	-0.805044	-0.129974	-0.158076
3.7	-0.22999	-0.445205	-1.25613	-1.84058		-0.762588	-0.649846	-0.593303	-0.372668
3.8	-0.221981	-0.591617	-1.16307	-1.68509		0.15283	-0.465232	-0.83082	-0.307374
3.9	-0.312525	-0.803385	-0.99523	-1.79439		0.799767	-0.443978	0.126814	-0.189826
4	-0.121486	-1.4277	-0.883963	-1.57106		-1.97137	0.0991287	0.442667	0.0391559
4.1	0.333565	-1.87461	-0.645953	-0.922386		0.49011	-0.323956	-0.271254	-0.0651196
4.2	0.793168	-0.622068	-0.516368	-1.26496		1.01693	0.0960299	0.83442	0.0699638
4.3	0.917766	-0.203449	-1.06712	-1.45071		-1.25706	0.877083	0.803672	0.0782098
4.4	0.816573	0.192522	-0.975851	-1.21244		0.370963	-0.297334	-0.06131	-0.0398511
4.5	0.888153	-0.570444	-1.70111	-1.61072		0.865207	-0.41574	1.2439	-0.145662
4.6	0.467742	-0.323488	-2.02447	-1.74		-1.0162	0.295265	0.617399	-0.0913234
4.7	0.614754	-0.418827	-1.57346	-1.7597		0.640923	0.702595	-0.377383	-0.185492
4.8	1.05237	-0.374629	-1.03709	-2.00865		1.19537	-0.0600411	0.266538	-0.36281
4.9	1.06636	-0.975874	-0.837733	-1.43044		-2.37512	-0.0403576	-0.029613	-0.277335
5	0.935035	-1.30803	-0.341103	-0.866932		0.374494	-0.123805	-0.528723	-0.289981
5.1	1.03415	-1.58665	-0.690249	-0.085995		1.1698	0.197939	1.16851	-0.210866
5.2	0.967521	-0.852009	-1.04207	0.0818147		-1.017	3.43301	1.37159	0.279255
5.3	1.25634	-0.293962	-1.05451	-0.14484		0.439022	6.65874	1.26101	1.12403
5.4	1.53325	-0.751606	-0.947304	0.0239612		2.90928	7.50425	0.556677	1.70467
5.5	1.3127	-0.789541	-0.166871	0.103275		0.250505	7.9901	0.0579478	2.45393
5.6	1.14106	-1.07634	-0.413485	-0.402548		3.79417	8.7066	-1.06275	2.65891
5.7	0.915146	-1.0349	-1.10735	0.0819436		3.84788	8.15389	-0.832043	2.99212
5.8	1.97893	-0.839438	-2.047	-0.25609		2.73244	8.95009	6.67351e-06	3.55495
5.9	3.19137	-0.167494	-2.89761	-0.670419		3.57774	8.82056	0.46074	4.04858
6	4.15892	-0.145744	-2.63651	0.195767		6.12961	8.95655	-0.581401	3.97843
6.1	5.33995	0.349016	-2.07188	0.0361367		3.47785	8.32524	-0.187526	4.05189
6.2	5.88066	-0.389536	-2.16044	0.186769		5.66311	9.33669	-0.800376	3.95723
6.3	6.09329	-0.619459	-2.46217	0.389717		7.00032	8.75836	-1.9309	4.45787
6.4	6.84122	-1.25551	-3.03723	0.237132		4.749	8.30639	-0.906424	4.86125
6.5	6.97943	-0.820601	-3.59606	0.761734		7.39649	8.50021	-1.10234	5.02003
6.6	6.59589	-0.406635	-3.18104	1.41113		7.79505	8.81903	-1.95094	4.90355
6.7	6.65446	0.225658	-2.26172	1.14104		5.56321	8.67025	-1.22482	4.79169
6.8	6.6905	0.421489	-1.64393	2.42142		7.78418	8.92295	-1.59578	4.80666
6.9	6.86357	0.891527	-1.52834	2.29002		8.30154	9.18664	-2.68931	4.99592
7	7.28504	1.0188	-1.93968	2.63289		6.92691	8.61718	-1.34253	4.80269
7.1	7.17568	0.611408	-2.31183	2.33173		9.45349	7.98971	-1.56464	4.67592
7.2	7.19272	0.229634	-2.68067	0.399622		9.80478	8.9837	-2.01341	4.56271
7.3	7.03192	-0.0417693	-2.40805	-1.00328		7.40412	8.3279	-2.39916	4.33016
7.4	7.28449	-0.160262	-2.93372	-0.684523		9.67977	9.70902	-2.45218	4.62513
7.5	7.53755	0.253312	-3.58486	0.0413371		10.4936	9.26485	-3.14862	4.80454
7.6	7.54177	0.639919	-4.33621	1.3267		7.79824	8.90479	-2.71752	4.8896
7.7	7.09254	0.670143	-3.93431	1.49885		10.7922	8.36321	-1.92602	5.10819
7.8	7.41622	1.02519	-3.3415	1.20932		11.1782	8.94045	-1.51832	5.0874
7.9	7.4165	1.25133	-2.56022	0.83384		8.26122	9.02538	-2.4549	4.97403
8	7.88467	2.10612	-2.75712	1.14752		9.35012	8.94202	-1.59094	4.94506
8.1	8.10001	2.66862	-3.26304	1.78548		12.3004	8.38547	-2.03618	4.68785
8.2	7.90546	2.81571	-3.96026	1.98779		8.66229	9.24962	-3.03819	4.487
8.3	7.41455	3.15874	-4.0655	2.57619		10.8315	9.40102	-1.93677	4.62326
8.4	7.71869	2.53762	-3.78594	2.1902		11.6124	9.48102	-2.19761	4.64178
8.5	7.43747	1.5375	-3.70176	1.76887		9.01586	8.8014	-3.22386	4.82512
8.6	7.84201	0.882672	-3.27967	2.83656		11.4915	8.30259	-2.5178	5.11407
8.7	7.97183	0.709694	-3.38912	2.89599		11.8954	9.45741	-2.81533	4.78723
8.8	7.96725	0.952723	-3.51531	3.00139		9.30217	9.14077	-3.4195	4.81016
8.9	7.78669	1.30238	-3.9405	3.50531		11.6042	8.85508	-2.1445	4.78975
9	7.94026	0.908448	-3.93662	2.98756		12.5497	8.31821	-1.97708	4.98879
9.1	7.52592	0.88448	-4.23127	2.27813		10.4718	9.80573	-3.06057	5.35516
9.2	7.88345	0.81088	-3.84493	2.59231		11.067	9.14361	-2.31674	5.62553
9.3	8.27092	1.5188	-3.85089	2.9267		12.0739	9.83729	-2.3613	5.25638
9.4	8.47996	2.38663	-3.69683	2.86873		10.0105	9.27507	-3.04262	5.07935
9.5	8.73818	2.55573	-3.88084	2.28619		11.8999	9.10005	-3.15467	4.59473
9.6	9.11836	2.31733	-3.997	1.58344		13.1317	8.34584	-2.65922	4.48499
9.7	9.06846	1.7299	-3.72516	0.923615		10.4906	8.63027	-2.86481	4.62326
9.8	9.37942	1.53143	-3.61878	0.628215		12.1847	9.86814	-2.80736	4.64978
9.9	9.22811	0.585881	-3.58481	1.49791		12.3511	9.14156	-1.99114	4.86693
10	9.25829	0.481113	-3.32636	1.57354		9.99256	7.8696	-2.1563	4.86566
10.1	9.43096	0.413044	-4.14012	0.780716		12.6761	9.00753	-3.29274	4.87512
10.2	9.3419	1.53022	-4.45149	0.774093		12.375	9.28144	-2.18692	5.04675
10.3	9.3722	2.38883	-3.90839	0.671335		9.93908	8.72375	-2.33442	4.79256
10.4	8.98553	3.4189	-3.76222	0.393891		12.2507	9.682	-3.22999	4.81016
10.5	8.46254	3.20713	-3.85702	0.495102		12.6934	9.45113	-1.96321	4.78975
10.6	8.31805	3.05439	-3.38765	0.497348		9.94147	9.36899	-1.96625	4.98879
10.7	8.52891	2.49299	-4.21392	0.490641		13.4127	8.8972	-2.88969	5.34832
10.8	8.3394	2.08071	-3.82542	2.46983		12.3555	9.72696	-1.91421	5.57867
10.9	9.00838	1.68875	-3.94494	3.12261		10.3025	9.09207	-2.16994	5.36601
11	8.74939	1.67181	-4.03331	3.14142		13.0676	8.70673	-3.19259	5.23163
11.1	8.85529	1.82672	-4.31574	2.32123		12.355	8.77434	-2.26005	4.82895
11.2	8.52886	2.17041	-4.39604	1.07907		11.7034	9.47906	-2.07755	4.86569
11.3	8.87258	2.23711	-4.8329	-0.150382		12.5348	9.04576	-2.67476	4.79169
11.4	9.00666	1.8941	-4.26161	0.763236		13.3098	9.50476	-3.03347	4.80666
11.5	9.29172	1.63301	-4.87947	1.42424		8.86134	9.49538	-2.70566	4.99592
11.6	8.88077	1.53388	-4.61908	1.91481		12.1334	8.54586	-3.10245	4.80269
11.7	8.88334	2.04858	-4.50496	1.98583		12.4818	8.5408	-3.11658	4.67592
11.8	8.71995	2.62816	-4.5979	1.87132		11.2125	8.71088	-2.22503	4.56271
11.9	9.01684	3.0889	-4.93843	0.971717		12.6663	8.64842	-2.26795	4.33016
12	9.30953	2.30906	-4.53288	1.93118		13.4376	8.44417	-3.26113	4.62513
12.1	9.42857	1.25595	-5.18091	2.2591		10.9824	9.5804	-2.32302	4.80454
12.2	8.92438	0.899398	-4.53134	2.32236		12.8278	9.84846	-2.47218	4.8896
12.3	8.55667	1.06555	-4.03738	2.32343		13.2402	9.26459	-3.26957	5.10819
12.4	8.62449	2.04717	-3.00024	1.97376		11.5686	8.2668	-1.97005	5.0874
12.5	8.32562	2.93873	-3.24763	1.07916		12.3865	8.85944	-2.09095	4.97403
12.6	8.23568	2.19443	-2.95363	0.968331		13.2841	9.37697	-3.22237	4.94506
12.7	8.73291	1.75995	-3.64758	0.699082		10.9896	9.1152	-2.12704	4.68785
12.8	9.37763	1.87278	-3.62928	0.698878		12.8996	9.11773	-2.40228	4.487
12.9	9.73457	1.51531	-3.73874	1.65734		13.3561	9.23387	-3.03592	4.62326
13	9.93355	1.57698	-3.97667	2.64104		11.0809	10.0821	-2.29573	4.64178
13.1	9.71328	2.04913	-4.37373	3.01626		13.6149	8.48611	-2.31382	4.82512
13.2	9.14011	1.34382	-4.10743	2.12904		14.0975	9.77846	-3.26049	5.11407
13.3	9.25973	1.58764	-4.59532	1.90573		11.1277	9.22885	-3.30937	4.78723
13.4	9.4707	2.12212	-4.48737	1.50524		13.6032	8.83295	-2.85544	4.81016
13.5	9.80579	2.06656	-4.39634	1.83706		13.1848	9.19088	-2.54878	4.87419
13.6	9.32008	1.93234	-4.56101	2.7885		10.6812	8.92124	-2.30107	4.8733
13.7	8.93519	2.46208	-3.93697	2.34862		13.3103	8.99452	-1.34346	5.18529
13.8	8.52207	1.92046	-4.10461	1.94613		13.9351	8.93966	-1.73159	5.04792
13.9	8.26254	2.50485	-4.25741	2.20167		11.5125	9.09084	-3.04006	4.77225
14	8.48959	3.14105	-4.10743	2.09909		12.7409	8.70796	-2.29516	4.76897
14.1	9.30671	3.08133	-4.59532	1.72341		13.7548	8.7938	-2.46683	4.98879
14.2	9.82293	3.31544	-4.47612	1.34186		10.9558	9.36052	-3.05455	5.23296
14.3	10.1359	3.53568	-4.2025	1.05696		13.5507	9.179	-2.15711	5.84962
14.4	10.1754	2.76361	-4.94633	0.857666		12.5823	9.09198	-2.15489	5.55152
14.5	9.74013	2.27291	-4.68901	1.2046		11.2722	10.1347	-3.08109	5.40778
14.6	9.56497	1.96268	-4.52036	1.60194		12.4206	9.42346	-2.09752	4.77309
14.7	9.58475	1.39986	-4.4819	2.11153		14.2634	8.60277	-2.2318	4.67027
14.8	9.5492	1.7799	-3.93697	1.97714		11.2158	8.33916	-3.21726	4.64017
14.9	9.28895	2.91265	-4.10461	1.80161		12.4768	8.84426	-1.85033	4.8348
15	9.09797	3.0918	-4.25741	1.23327		13.7303	9.60628	-1.86913	4.95499
15.1	9.30402	3.48587	-4.10743	0.381245		10.8012	9.24438	-2.60942	4.80114
15.2	9.62809	3.53191	-4.59532	0.358787		13.6905	9.78234	-2.34027	4.56464
15.3	10.0994	2.92615	-4.48737	1.52582		13.0685	9.35781	-2.14001	4.76385
15.4	10.6423	2.06073	-4.39634	1.77448		10.3617	9.43166	-2.86256	4.77186
15.5	10.5712	2.08453	-4.56101	1.23297		12.8389	9.71967	-2.97058	4.66524
15.6	10.4152	1.87679	-3.93697	2.04074		12.5633	9.52213	-2.04652	4.58501
15.7	10.2803	3.16686	-4.10461	0.665579		11.2382	9.97145	-2.14136	4.4626
15.8	10.4928	3.45008	-4.25741	0.118688		11.733	9.31522	-2.31378	4.66271
15.9	10.3838	2.94283	-4.10743	0.164654		13.2303	9.44179	-1.37437	4.98826
16	10.2743	2.6009	-4.59532	-0.478278		11.0901	8.96825	-1.44029	4.99314
16.1	9.60529	2.37512	-4.47612	-1.36752		13.3116	9.2422	-2.41089	5.25827
16.2	9.28949	1.89949	-4.2025	0.0245512		13.3365	9.52196	-1.56895	5.06656
16.3	9.00575	2.36682	-4.94633	-0.163733		11.3016	9.44454	-1.37503	5.00545
16.4	9.34429	1.65698	-4.68901	-0.161794		12.7549	9.31993	-2.36032	4.72702
16.5	9.33173	1.45492	-4.52036	0.694724		12.816	9.80185	-1.40207	4.09668
16.6	9.45797	1.60597	-4.4819	0.269028		14.1186	9.84462	-1.67717	3.69526
16.7	9.37709	2.12475	-4.07206	-0.960008		9.58141	9.16382	-2.79089	3.46219
16.8	10.0157	2.76901	-3.95296	-0.512227		12.4036	9.24726	-2.01218	2.91583
16.9	9.99838	2.42938	-3.74792	-0.25901		13.1677	7.86096	-2.04467	2.52162
17	9.93045	1.42063	-3.51281	-0.401571		10.6823	6.72525	-2.67005	1.96318
17.1	9.3591	1.44045	-4.01397	0.132004		12.6902	4.64766	-1.41184	1.52212
17.2	8.70582	0.749574	-4.60045	0.0966325		11.926	3.59475	-1.18843	1.4243
17.3	8.10795	1.12025	-4.3247	-0.36157		10.2608	3.89	-2.17426	1.41788
17.4	8.37873	1.47842	-4.74825	0.991011		12.1886	2.90815	-2.01812	1.20188
17.5	7.85685	0.846546	-4.52552	1.86134		13.3819	2.09907	-2.30196	0.942146
17.6	8.01147	0.378402	-4.33309	1.4748		10.0368	1.71439	-2.69114	0.538826
17.7	8.02408	0.876582	-4.47976	0.457679		12.2212	1.43944	-2.41932	0.496695
17.8	7.79605	0.941853	-4.4683	0.324105		12.9964	0.67523	-1.78028	0.599271
17.9	7.73538	1.71936	-4.36688	-0.26424		9.61991	1.12162	-1.51482	0.41309
18	8.10893	1.91606	-4.64667	0.435216		11.8401	0.369198	-1.84528	0.529503
18.1	7.92885	2.04144	-4.7229	0.547126		11.392	0.00660334	-1.04246	0.271063
18.2	7.99589	1.50123	-4.39134	-0.0970303		8.75769	0.0965973	-0.799362	0.113921
18.3	7.70651	1.54368	-3.77547	-0.736998		11.3445	0.715557	-1.65729	-0.0574874
18.4	7.46172	1.02098	-3.44238	-0.410074		12.179	0.644024	-0.631015	-0.207988
18.5	6.32999	0.359155	-4.03729	-0.211567		8.69789	0.660478	-0.568476	-0.532312
18.6	6.45686	-0.328674	-4.07513	0.331908		11.6363	-0.137902	-1.43632	-0.396244
18.7	6.16253	-0.0858707	-4.19579	-0.00598674		12.4748	0.38827	-0.720401	-0.364152
18.8	6.14812	-0.356708	-4.06897	-0.292513		8.70688	0.479312	-0.711945	-0.0903005
18.9	6.66105	0.247696	-4.20872	-0.127112		11.38	0.570484	-1.54514	-0.275184
19	6.83764	0.402589	-4.20957	-0.0456216		11.4504	0.462902	0.169906	-0.324817
19.1	6.76018	0.594249	-4.05082	0.136614		9.56626	-0.16854	-0.174213	-0.166754
19.2	7.18665	0.386344	-3.71239	-0.0177756		11.3565	0.807209	-0.563326	-0.139541
19.3	6.81752	1.13912	-3.93094	-1.00997		11.2584	0.282303	-0.894003	-0.395394
19.4	6.70828	0.831138	-3.84848	-1.6347		9.27101	0.694433	-0.673704	-0.517189
19.5	6.56568	1.05	-4.42619	-1.25554		10.8732	-0.0403576	-1.08118	-0.59915
19.6	6.25798	0.966914	-4.0165	-0.818344		11.2289	0.523872	-0.484013	-0.418338
19.7	6.48896	0.976241	-3.44091	-0.279757		8.62715	1.15518	-0.109191	-0.199515
19.8	6.04969	0.525178	-3.11645	0.250824		10.9393	-0.315795	0.253505	-0.0137642
19.9	5.55582	0.704256	-2.87844	0.563426		11.2824	-0.278785	-0.6732	-0.382063
20	5.60091	0.494041	-2.04306	0.844747		7.88128	-0.0283555	0.247652	-0.330204
20.1	5.34508	0.714736	-2.40425	1.29303		10.2826	0.95394	0.225205	-0.341476
20.2	5.63852	0.8507	-2.42046	1.73028		11.105	0.953504	-0.906325	-0.754235
20.3	5.71256	0.15369	-2.79935	2.21881		8.78668	0.59667	0.663851	-0.707526
20.4	5.46546	-0.120729	-3.59521	1.84416		9.74948	0.794247	0.491024	-1.00727
20.5	5.29144	-0.105488	-3.96247	1.08772		9.78223	-0.273024	-0.401487	-0.962775
20.6	5.54883	0.158057	-4.0562	0.181613		8.08763	-0.077455	0.568269	-0.479598
20.7	5.66654	0.767641	-4.30939	-0.949494		9.67231	0.921731	0.22287	-0.379767
20.8	4.9858	0.815704	-4.20086	-2.0573		10.371	0.334457	-1.01298	-0.506704
20.9	4.66933	0.722004	-3.75116	-1.3266		8.3049	0.408041	0.790704	-0.201282
21	4.21069	0.433239	-3.27898	-0.871325		9.36265	0.342269	0.464621	-0.241651
21.1	4.10406	0.339218	-2.87311	-0.622624		10.2005	-0.943091	-0.125662	0.129934
21.2	4.16585	-0.309005	-3.07481	0.0201539		7.11896	0.365226	0.14697	0.384713
21.3	4.54801	-0.243062	-3.25282	-0.223579		9.50065	-0.446072	-0.0752792	0.314696
21.4	4.30631	-0.222013	-3.35668	-1.17391		9.72539	-0.871733	-1.10313	0.052341
21.5	4.79136	-0.0845471	-3.17481	-1.29838		6.94627	0.553332	-0.900556	-0.13789
21.6	5.07013	-0.241883	-2.68013	-1.46885		9.10499	0.000144025	-0.332265	-0.35656
21.7	5.14238	-0.209494	-2.69764	-1.81175		9.81139	0.0749935	0.120713	-0.312941
21.8	5.29474	-0.140009	-2.86367	-0.951283		7.68804	-0.175043	0.0323538	-0.328817
21.9	5.47517	-0.0867508	-3.73692	-0.874839		9.3811	-0.671014	0.906687	-0.170726
22	5.33638	-0.127172	-4.20931	0.104292		9.16263	-0.464359	0.445494	0.0292846
22.1	5.02049	-0.118994	-3.92519	0.168739		6.5734	-0.474528	-0.592365	0.304269
22.2	4.76137	-0.0553569	-3.48947	1.08781		9.31931	-0.0182301	0.525294	0.213601
22.3	4.70106	-0.446951	-2.82976	1.09603		8.71292	-0.0298831	0.582708	0.381626
22.4	4.98377	0.0728416	-2.56896	1.32839		5.80765	-0.0719995	-0.164943	0.120602
22.5	4.88417	-0.501013	-2.60686	0.502306		8.82717	-1.22573	0.476394	0.0282932
22.6	4.65846	-0.885293	-2.6925	0.213366		8.95087		0.12154	0.193712
22.7	4.35226	-0.692208	-3.00926	-0.931786		7.1177	0.233596	-0.85224	0.264575
22.8	3.79014	-0.362436	-3.077	-0.664262		9.21474	-0.114029	0.909503	-0.000419494
22.9	3.78507	-0.436882	-2.64722	-0.679888		9.12646	0.309798	0.972363	-0.275022
23	4.11914	-0.686154	-2.96567	-0.678703		6.43642	-0.161906	0.511915	-0.305996
23.1	3.85958	-0.737261	-2.44923	-0.694031		8.53169	0.115146	0.14093	-0.453503
23.2	4.01746	-0.335739	-1.88354	-0.482542		9.04815	0.10633	0.125122	-0.0857436
23.3	3.71267	-0.134093	-1.92899	-0.640278		6.3273	-0.16518	-0.705132	0.381682
23.4	3.26176	0.324931	-2.07803	0.172333		8.62664	-0.297028	-0.221567	0.403734
23.5	3.01495	0.259832	-2.13638	0.0401225		8.38413	0.425499	0.271795	0.325792
23.6	3.26502	-0.00756631	-2.52523	-0.62021		5.83459	-0.452226	0.416836	0.338353
23.7	3.52248	0.267744	-2.82371	-0.31263		8.74094	0.00381012	-0.448731	-0.0483129
23.8	3.97462	0.158693	-2.26895	-0.223976		8.63535	0.0419986	0.631405	-0.14825
23.9	3.85172	-0.265373	-2.22411	0.248856		5.41353	0.311631	0.423626	-0.172887
24	4.04198	-0.252968	-2.85203	0.846635		7.36033	-0.0473843	-0.401235	-0.394047
24.1	4.01006	-1.00945	-3.24756	-0.177812		7.94627	-0.103205	0.844017	-0.297339
24.2	4.07549	-0.534374	-3.04992	-1.06603		5.02249	0.750079	0.845534	-0.392224
24.3	4.05504	-0.342471	-3.18414	-0.971901		8.499	-0.0403576	-0.140718	-0.401877
24.4	4.03991	-0.795163	-2.6071	-1.86872		6.87485	-0.369303	0.635835	-0.387249
24.5	3.69763	-0.780439	-2.94806	-1.52561		6.10387	0.0346664	0.410393	-0.337589
24.6	3.71365	-0.8146	-3.2902	-0.735386		7.39456	0.207366	-0.71085	-0.398921
24.7	3.7206	-1.16747	-3.65151	-0.322892		8.19441	-0.365156	1.03522	-0.136975
24.8	3.39098	-1.16167	-2.95494	0.223261		5.19381	-0.0411869	0.951542	-0.12047
24.9	3.27738	-1.33477	-2.92865	0.510595		7.57681	0.11436	0.705025	0.185298
25	3.18924	-1.72678	-2.8259	-0.275429		8.07783	-0.348092	0.273853	0.346416
25.1	3.09435	-1.44683	-2.71617	-1.08889		5.11817	-0.390164	0.370503	0.343094
25.2	3.58371	-1.3082	-2.87939	-1.46044		7.57481	-0.582896	0.223343	0.308035
25.3	3.41654	-0.0618152	-3.46885	-0.854831		7.22221	0.543687	0.230986	0.257405
25.4	2.77322	-0.18081	-3.47311	-0.302507		4.88364	-0.501369	0.812845	0.292476
25.5	2.71921	0.207419	-4.15434	0.163806		7.38299	-0.658051	0.988494	0.559655
25.6	2.32569	0.244339	-4.17014	0.0661937		7.58336	-0.405527	-0.0817955	0.445715
25.7	2.44916	-0.303259	-3.07873	-0.514993		4.66095	-0.519787	0.856242	0.0236733
25.8	2.53305	-0.975357	-2.98076	-1.08895		6.61059	0.269777	1.05545	-0.158076
25.9	2.76536	-1.12291	-2.70973	-0.706589		7.65404	-0.419319	-0.30051	-0.372668
26	3.0001	-1.37906	-2.44529	-0.846156		5.09619	-0.493644	0.716251	-0.307374
26.1	3.37279	-1.06203	-2.7255	-0.637799		6.81574	-0.343989	0.12481	-0.189826
26.2	2.99124	-0.451689	-2.47182	-0.981806		6.41216	0.111349	-0.872758	0.0391559
26.3	2.6996	-0.403061	-1.97363	-0.297068		4.72587	-0.805044	0.123751	-0.0463346
26.4	1.84398	-0.47442	-2.18358	0.684532		7.36648	-0.649846	0.0489171	0.137123
26.5	1.87694	-1.06675	-1.9771	0.834093		5.92031	-0.465232	-0.486798	0.0127139
26.6	1.95803	-1.08943	-2.81086	1.13302		3.72833	-0.443978	1.25306	-0.632838
26.7	2.28619	-1.53252	-3.75884	0.320199		5.35311	0.0991287	0.977304	-0.730261
26.8	2.63	-1.12505	-3.66928	-0.852789		6.45938	-0.323956	0.636485	-1.03332
26.9	3.19669	-0.836279	-3.144	-1.03778		4.602	0.0960299	1.62491	-0.962775
27	3.67479	-1.08823	-2.74672	-1.48418		6.80019	0.877083	0.944843	-0.479598
27.1	3.4302	-1.15476	-2.32369	-1.5981		6.28982	-0.297334	-0.73107	-0.379767
27.2	3.05555	-1.74727	-2.22951	-0.736586		3.448	-0.41574	0.500479	-0.506704
27.3	2.29897	-1.94652	-2.4252	-0.343202		6.78726	0.295265	-0.390529	-0.201282
27.4	2.1341	-1.64408	-2.16829	-0.691444		6.92879		-0.80531	-0.241651
27.5	2.27045	-0.406156	-2.10823	0.00702161		3.25869	0.233596	0.258842	0.129934
27.6	2.41533	0.406252	-2.86088	-0.538343		5.20155	-0.114029	0.18175	0.384713
27.7	2.24861	0.755852	-2.86518	-0.64584		6.00175	0.309798	-0.801932	0.314696
27.8	2.41876	0.180262	-2.88032	-0.117797		3.42032	-0.161906	0.586746	0.052341
27.9	2.33717	-0.410324	-2.96449	-0.270378		6.15701	0.115146	0.252474	-0.13789
28	2.33291	-1.80999	-2.85016	-1.0624		5.92407	0.10633	-0.855189	-0.35656
28.1	2.67041	-1.32442	-2.22684	-1.11798		3.43621	-0.16518	0.02748	-0.312941
28.2	2.25709	-1.14612	-2.14779	-1.52591		5.3903	-0.297028	-0.104922	-0.328817
28.3	2.35151	-1.02068	-1.49919	-1.4311		5.91478	0.425499	-0.93864	-0.170726
28.4	2.26458	-0.843315	-1.55006	-0.913805		2.93046	-0.452226	-0.618077	0.0292846
28.5	2.16145	-0.544038	-1.69121	-1.28606		5.73766	0.00381012	-0.192957	0.304269
28.6	2.11533	-0.516701	-1.7516	-0.942221		6.03558	0.0419986	-0.467981	0.213601
28.7	2.24619	0.206508	-1.57706	-1.06373		4.2367	0.311631	-0.351954	0.381626
28.8	1.84512	-0.426501	-1.91305	-0.403485		6.66709	-0.0473843	0.508658	0.120602
28.9	2.32831	-0.688932	-2.09637	0.441056		5.6348	-0.103205	0.261916	0.0282932
29	2.00147	-1.09491	-2.13709	0.280232		3.35175	0.750079	-0.614488	0.193712
29.1	1.60437	-1.42019	-1.90668	-0.37608		5.65866	-0.0403576	0.467667	0.264575
29.2	1.6334	-1.22325	-1.98078	-0.743065		5.45636	-0.369303	0.456634	-0.000419494
29.3	1.44878	-0.893326	-2.44948	-0.568752		3.11203	0.0346664	-0.385494	-0.275022
29.4	1.31674	-1.1308	-2.90113	-0.724738		5.54401	0.207366	0.565783	-0.305996
29.5	1.45475	-1.14108	-3.35128	-0.501097		6.07602	-0.365156	0.587635	-0.453503
29.6	1.44897	-1.69397	-3.32417	-0.794107		2.94442	-0.0411869	-0.67494	-0.0857436
29.7	1.59153	-2.33025	-3.22663	-0.807483		4.92305	0.11436	0.653268	0.381682
29.8	1.52983	-2.26216	-3.08244	-0.538065		5.77234	-0.348092	0.552141	0.403734
29.9	1.71775	-2.19181	-3.28821	0.00686793		3.08173	-0.390164	-0.532055	0.325792
30	1.70922	-1.7215	-2.32763	-0.0724463		5.92327	-0.582896	0.39143	0.338353
30.1	1.77392	-1.21785	-2.18363	0.137259		6.66464	0.543687	0.120083	-0.0483129
30.2	1.63447	-1.12306	-1.93176	-0.974549		3.01806	-0.501369	-0.514876	-0.14825
30.3	1.96468	-1.15701	-2.36966	-0.84213		5.30749	-0.658051	0.145515	-0.172887
30.4	1.99425	-1.41076	-2.1072	-0.703341		4.98672	-0.405527	-0.631204	-0.394047
30.5	2.14005	-1.70186	-2.31112	-0.837872		2.76758	-0.519787	-0.543351	-0.297339
30.6	1.7893	-1.44504	-1.7636	-0.729085		6.29763	0.269777	0.864098	-0.367517
30.7	1.7214	-1.34531	-1.61122	0.0676314		5.69887	-0.419319	0.165874	-0.551504
30.8	1.19036	-1.02817	-1.42404	-0.835919		2.93382	-0.493644	0.812845	-0.364053
30.9	1.05887	-1.10124	-2.02038	-0.148261		5.83254	-0.343989	0.988494	0.0139616
31	1.35634	-1.03731	-2.21641	-0.430399		5.69608	0.111349	-0.0817955	0.151983
31.1	1.42132	-0.72535	-2.63153	-0.728709		2.50354	-0.805044	0.856242	0.462063
31.2	1.63154	-0.369165	-2.52113	-0.874468		4.64659	-0.649846	1.05545	0.338353
31.3	1.49451	0.0646061	-2.06358	-0.393174		6.31642	-0.465232	-0.30051	-0.0483129
31.4	1.5429	0.303559	-1.79916	-0.865693		3.12781	-0.443978	0.716251	-0.14825
31.5	1.28968	-0.333	-1.79423	-1.00506		4.6737	0.0991287	0.12481	-0.172887
31.6	1.68015	-0.568514	-1.57357	-1.7649		4.58172	-0.323956	-0.872758	-0.394047
31.7	1.27459	-1.52959	-1.50896	-1.5836		2.47108	0.0960299	0.123751	-0.297339
31.8	1.34688	-1.97547	-1.15428	-1.43992		4.58349	0.877083	0.0489171	-0.392224
31.9	1.11938	-1.82056	-1.5858	-1.51275		3.73642	-0.297334	-0.486798	-0.401877
32	1.56167	-1.50071	-2.24766	-1.42999		2.16159	-0.41574	1.25306	-0.387249
32.1	1.46524	-1.53927	-2.48191	-1.81339		4.06948	0.295265	0.977304	-0.337589
32.2	1.4755	-0.818073	-2.25396	-1.48593		4.77542		0.382668	-0.398921
32.3	1.01131	-0.72535	-2.29684	-0.629594		2.6089	-0.452226	2.23108	-0.136975
32.4	1.16322	-0.369165	-1.73859	-0.746427		3.96417	0.00381012	1.16871	-0.12047
32.5	1.08027	0.0646061	-1.81279	-1.19465		4.35613	0.0419986	-0.0920878	0.185298
32.6	1.49296	0.303559	-1.43191	-2.0605		1.0277	0.311631	0.742489	0.346416
32.7	1.09584	-0.333	-1.1887	-2.72632		4.24165	-0.0473843	-0.140383	0.343094
32.8	0.469128	-0.568514	-0.463083	-3.11991		3.79474	-0.103205	-0.801932	0.308035
32.9	0.062204	-1.53204	-0.24704	-2.14301		1.66472	0.750079	0.586746	0.257405
33	0.269098	-1.87368	0.00391431	-1.53498		3.68795	-0.0403576	0.252474	0.292476
33.1	0.603712	-2.00026	-0.0920036	-1.43483		4.06077	-0.369303	-0.855189	0.559655
33.2	0.446621	-1.51176	-0.342841	-1.60587		0.678057	0.0346664	0.02748	0.445715
33.3	0.598566	-1.99661	-0.760808	-1.9679		4.33249	0.207366	-0.104922	0.0236733
33.4	0.908112	-1.62189	-0.347068	-1.79122		3.76552	-0.365156	-0.93864	-0.158076
33.5	0.844712	-1.82056	-0.721322	-0.583044		2.0679	-0.0411869	-0.618077	-0.372668
33.6	1.10482	-1.50071	-0.667469	-0.362507		3.10024	0.11436	-0.192957	-0.307374
33.7	1.43864	-1.53927	-0.110697	-0.391716		4.38842	-0.348092	-0.467981	-0.189826
33.8	0.753418	-0.818073	-0.131616	-0.574562		1.41982	-0.390164	-0.351954	0.0391559
33.9	0.673857	-0.72535	-0.501428	-1.04571		3.72639	-0.582896	0.508658	-0.0463346
34	0.970215	-0.369165	-0.779746	-0.658283		4.54083	0.543687	0.261916	0.137123
34.1	0.91162	-0.0543308	-1.60154	-0.379694		1.77595	-0.501369	-0.614488	0.0127139
34.2	0.685893	0.299658	-1.28826	-0.634953		3.94828	-0.658051	0.467667	-0.632838
34.3	0.455556	0.120909	-0.276109	-0.621781		2.97443	-0.405527	0.456634	-0.730261
34.4	0.341152	0.456338	0.977926	-1.34051		1.6379	-0.519787	-0.385494	-1.03332
34.5	0.317369	0.314594	1.20176	-1.50207		3.23927	0.269777	0.565783	-0.962775
34.6	0.168168	-0.310221	0.856495	-1.28683		2.68983	-0.419319	0.587635	-0.479598
34.7	0.0763545	-0.137587	0.454844	-0.742907		1.68363	-0.493644	-0.67494	-0.379767
34.8	-0.140888	-0.101212	0.444478	-1.00323		2.87448	-0.343989	0.653268	-0.506704
34.9	-0.0458822	-0.124531	0.311559	-1.25369		3.81695	0.111349	0.552141	-0.201282
35	0.684482	0.170715	0.541594	-2.20831		0.047807	-0.805044	-0.532055	-0.241651
35.1	1.25335	0.115177	-0.00198017	-1.78514		2.83381	-0.649846	0.39143	0.129934
35.2	1.35086	-0.763751	-0.708965	-0.96802		3.37544	-0.465232	0.120083	0.384713
35.3	1.10616	-1.12344	-0.682316	-0.0442781		0.451096	-0.443978	-0.514876	0.314696
35.4	0.654308	-1.93506	-0.365446	-1.03482		2.77265	0.0991287	0.145515	0.052341
35.5	0.157266	-1.15793	-0.531812	-1.87417		3.29041	-0.323956	-0.631204	-0.13789
35.6	0.367934	-0.324096	-0.17873	-2.42826		1.262	0.0960299	-0.543351	-0.35656
35.7	0.307702	0.590469	-0.386192	-2.19376		3.61602	0.877083	0.864098	-0.312941
35.8	0.0251124	0.626394	-0.43797	-1.61508		3.0233	-0.297334	0.165874	-0.328817
35.9	-0.263987	0.25917	0.169401	-1.05398		0.53516	-0.41574	0.812845	-0.170726
36	-0.454072	-0.286524	-0.355433	-1.48195		3.33205	0.295265	0.988494	0.0292846
36.1	-0.255467	0.235049	-0.910138	-1.39659		2.61135		-0.0817955	0.304269
36.2	0.253313	0.120909	-1.24993	-0.961397		0.207847	0.233596	0.856242	0.213601
36.3	0.650678	0.456338	-1.47335	-1.31223		2.71301	-0.114029	1.05545	0.31689
36.4	0.703814	0.314594	-0.914441	-1.23724		1.12816	0.309798	-0.30051	0.266953
36.5	0.667501	-0.310221	-0.437899	-1.69044		1.9639	-0.161906	0.716251	0.181696
36.6	0.581237	-0.137587	-0.790572	-1.04981		2.493	0.115146	0.12481	0.258165
36.7	0.664618	-0.101212	-0.216976	-0.594808		3.0868	0.10633	-0.872758	0.0514036
36.8	0.304674	-0.124531	-0.524156	0.0054848		0.969717	-0.16518	-0.420692	-0.128831
36.9	-0.00708928	0.16016	-0.159877	-0.0893711		2.56266	-0.297028	1.25977	-0.35656
37	-0.468878	-0.191431	0.0221144	-0.71228		2.3603	0.425499	0.907734	-0.312941
37.1	-0.713404	-0.300299	-0.402232	-1.24163		-0.39404	-0.452226	1.12049	-0.328817
37.2	-0.675271	-0.0664121	-0.892849	-1.00359		2.98349	0.00381012	0.975375	-0.170726
37.3	-0.818576	-0.468807	-0.618627	-1.19824		1.00958	0.0419986	-0.324257	0.0292846
37.4	-0.302233	-0.010789	-0.950705	-1.23225		0.844647	0.311631	-0.801932	0.304269
37.5	0.00412518	-0.101212	-0.490156	-1.42422		1.47581	-0.0473843	0.586746	0.213601
37.6	0.159953	-0.124531	-0.59605	-1.74031		2.7735	-0.103205	0.252474	0.381626
37.7	0.39485	0.170715	-1.1208	-1.84049		0.339809	0.750079	-0.855189	0.120602
37.8	0.485299	0.115177	-0.888787	-1.45131		2.03452	-0.0403576	0.02748	0.0282932
37.9	-0.135833	-0.763751	-0.141569	-1.11036		2.09581	-0.369303	-0.104922	0.193712
38	-0.0701387	-1.12344	0.460485	-1.2285		0.00873671	0.0346664	-0.93864	0.264575
38.1	0.182582	-1.93506	0.618833	-1.25858		1.57969	0.207366	-0.618077	-0.000419494
38.2	0.534867	-1.15793	0.485364	-1.05377		0.200215	-0.365156	-0.192957	-0.275022
38.3	0.6022	-0.324096	-0.407656	-1.34711		1.49443		-0.467981	-0.305996
38.4	0.433544	0.590469	-0.417449	-1.76189		1.97535	-0.405527	-0.351954	-0.453503
38.5	-0.246838	0.691386	-0.42364	-2.06017		2.53475	-0.519787	0.508658	-0.0857436
38.6	-0.718919	0.15255	-0.62223	-1.72342		-0.0406992	0.269777	0.261916	0.381682
38.7	-0.537309	-0.348725	-1.17954	-0.865083		1.6117	-0.419319	-0.614488	0.403734
38.8	-0.368527	-0.143645	-1.41812	-0.0732643		2.35552	-0.493644	0.467667	0.325792
38.9	-0.18725	-0.399338	-1.17814	-0.0603799		-0.527483	-0.343989	0.456634	0.338353
39	-0.549902	-0.0305256	-0.496971	-0.969309		1.80204	0.111349	-0.385494	-0.0483129
39.1	-0.340773	-0.101212	-0.246664	-0.938344		0.0973567	-0.805044	0.565783	-0.14825
39.2	-0.100415	-0.124531	0.0220909	-1.4182		2.45399	-0.649846	0.587635	-0.172887
39.3	0.533903	0.170715	-0.576887	-1.38413		1.11438	-0.465232	-0.67494	-0.394047
39.4	0.567143	0.115177	-1.23195	-1.67997		2.56847	-0.443978	0.653268	-0.297339
39.5	0.547155	-0.763751	-0.898105	-2.23442		0.0245698	0.0991287	0.552141	-0.367517
39.6	-0.626372	-1.12344	-0.408586	-2.60059		1.14815	-0.323956	-0.532055	-0.551504
39.7	-0.682757	-1.93506	-0.267603	-1.60725		1.52291	0.0960299	0.39143	-0.364053
39.8	-0.892229	-1.15793	0.361932	-1.74858		-0.66252	0.877083	0.120083	0.0139616
39.9	-0.199714	-0.324096	-0.00300877	-1.81802		1.09581	-0.297334	-0.514876	0.151983
40	0.0137646	0.590469	-0.26339	-2.40046		0.0713858	-0.41574	0.145515	0.462063
40.1	0.214106	0.673198	-0.22141	-3.13416		0.974615	0.295265	-0.631204	0.338353
40.2	-0.338206	0.357838	-0.371256	-3.89224		1.39698		-0.543351	-0.0483129
40.3	-0.564722	-0.720992	-0.145932	-2.62952		1.2366	0.233596	0.864098	-0.14825
40.4	-0.56723	-0.392467	0.212537	-2.25947		-1.64941	-0.114029	0.165874	-0.172887
40.5	-0.36074	-0.420318	-0.133584	-1.43906		1.32619	0.309798	0.812845	-0.394047
40.6	-0.709072	0.0232733	-0.772175	-1.85963		0.678855	-0.161906	0.988494	-0.297339
40.7	-0.68999	0.170715	-0.997757	-1.81682		-1.50697	0.115146	-0.0817955	-0.392224
40.8	-0.916156	0.115177	-1.19998	-1.24306		0.488914	0.10633	0.856242	-0.401877
40.9	-1.24069	-0.763751	-0.829067	-0.532944		-1.39358	-0.16518	1.05545	-0.387249
41	-1.28084	-1.12344	-0.602296	-1.18228		1.23717	-0.297028	-0.30051	-0.337589
41.1	-1.5638	-1.61914	-1.14083	-1.06607		1.02331	0.425499	0.716251	-0.398921
41.2	-1.60146	-1.82788	-1.26673	-2.18748		0.490281	-0.452226	0.12481	-0.136975
41.3	-1.36293	-0.975226	-0.25509	-2.41923		-0.700224	0.00381012	-0.872758	-0.12047
41.4	-0.945899	0.00184136	-0.18159	-1.90489		1.19622	0.0419986	-0.166874	0.185298
41.5	-0.493517	0.492687	0.00335069	-2.30382		0.938108	0.311631	0.6536	0.346416
41.6	-0.0762843	0.664553	-0.436128	-1.42916		-0.787306	-0.0473843	0.683867	0.343094
41.7	-0.21177	0.357838	-1.36125	-0.59928		0.0879024	-0.103205	0.481503	0.308035
41.8	-0.156084	-0.720992	-1.1705	-0.466132		-0.572419	0.750079	0.733366	0.257405
41.9	-0.566652	-0.392467	-0.616157	-1.20981		0.28576	-0.0403576	-0.574404	0.292476
42	-0.657395	-0.420318	-0.752481	-1.88714		0.540001	-0.369303	-0.80531	0.559655
42.1	-0.476803	0.0232733	-0.382482	-2.53176		-0.23269	0.0346664	0.258842	0.445715
42.2	-0.0846891	0.170715	-0.890656	-1.89115		-0.910668	0.207366	0.18175	0.0236733
42.3	-0.503707	-0.0187017	-1.11039	-1.62005		1.20864	-0.365156	-0.801932	-0.158076
42.4	-0.561183	-0.452183	-0.704987	-1.48822		0.329785		0.586746	-0.372668
42.5	-0.53781	-0.879283	-0.720811	-1.90069		-0.545025	-0.405527	0.252474	-0.307374
42.6	-0.782971	-1.49578	-0.373384	-2.22522		0.00207312	-0.519787	-0.855189	-0.215027
42.7	-0.702404	-1.8398	0.0755498	-2.20851		-0.866984	0.269777	0.02748	0.0307548
42.8	-0.679424	-1.13691	-0.127159	-2.53794		0.664673	-0.419319	-0.104922	0.0970983
42.9	-0.812833	-0.324096	0.140553	-2.46532		0.38429	-0.493644	-0.93864	0.219617
43	-0.587449	0.590469	0.0138152	-2.30831		0.139901	-0.343989	-0.618077	0.357927
43.1	-0.471144	0.673198	-0.462435	-1.72104		-0.430149	0.111349	-0.192957	0.135538
43.2	-0.33313	0.357838	-0.949573	-1.56862		1.33377	-0.805044	-0.467981	0.0282932
43.3	-0.154031	-0.720992	-1.25613	-1.27671		0.456678	-0.649846	-0.351954	0.193712
43.4	0.165863	-0.340595	-1.16307	-1.34765		-0.533349	-0.465232	0.508658	0.264575
43.5	0.628873	-0.335822	-0.99523	-2.2373		0.837983	-0.443978	0.261916	-0.000419494
43.6	0.762998	-0.656218	-0.883963	-2.7736		-0.939088	0.0991287	-0.614488	-0.275022
43.7	0.581237	-0.378557	-0.645953	-2.55686		1.05259	-0.323956	0.467667	-0.305996
43.8	0.664618	0.249604	-0.516368	-2.42564		0.921933	0.0960299	0.456634	-0.453503
43.9	0.304674	0.885737	-1.06712	-2.07967		-0.395236	0.877083	-0.385494	-0.0857436
44	-0.00708928		-0.975851	-1.3872		-0.0666131	-0.297334	0.565783	0.381682
44.1	-0.468878		-1.70111	-1.40014		0.581464	-0.41574	0.587635	0.403734
44.2	-0.713404		-2.02447	-1.36275		-0.518712	0.295265	-0.67494	0.325792
44.3	-0.675271		-1.57346	-1.06088		-0.419271		0.653268	0.338353
44.4	-0.818576		-1.03709	-1.6747		0.511183	0.233596	0.552141	-0.0483129
44.5	-0.302233		-0.837733	-1.99616		-0.740604	-0.114029	-0.532055	-0.14825
44.6	0.00412518		-0.341103	-2.5624		0.262807	0.309798	0.39143	-0.172887
44.7	0.159953		-0.728527	-2.10467		0.798002	-0.161906	0.120083	-0.336465
44.8	0.39485		-0.86658	-2.08939		-1.25307	0.115146	-0.387468	-0.386078
44.9	0.485299		-1.0835	-1.86866		0.377341	0.10633	-0.046695	-0.553143
45	-0.135833		-1.22157	-1.84025		0.0496295	-0.16518	-1.0148
45.1	-0.0701387		-0.776153	-1.50706		-1.08819	-0.297028	-0.808276
45.2	0.182582		-0.712197	-1.99509		-0.83435	0.425499	0.0674953
45.3	0.534867		-0.661138	-1.36775		0.733302	-0.452226	-0.0941071
45.4	0.6022		-0.370754	-1.2967		-1.00362	0.00381012	0.565783
45.5	0.433544		-0.476962	-1.43788		0.391694	0.0419986	0.587635
45.6	-0.246838			-1.4223		-0.655002	0.311631	-0.38298
45.7	-0.718919			-1.84257		-1.53408	-0.0473843	0.207699
45.8	-0.537309			-1.4246		0.655447	-0.103205	-0.437666
45.9	-0.368527			-0.743789		0.825624	0.750079
46	-0.18725			-0.303736		-1.49621	-0.0403576
46.1	-0.549902			-0.345106		0.136769	-0.369303
46.2	-0.483808			-1.08543		0.620078	0.0346664
46.3	0.0451245			-1.92365		-1.17881	0.207366
46.4	0.830716					0.0977554	-0.365156
						0.555721

## Sheet: Fig 3h
Time (s)	A414_Ixo_GoA	A414_ACh_GoA	A414_Arec_GoA	A414_Pilo_GoA		A414_Ixo_endo	A414_ACh_endo	A414_Arec_endo	A414_Pilo_endo
0	0.586126	-0.866444	1.67042	-0.00136642		1.12378	-1.41867	0.909603	-0.25937
0.1	0.456374	-0.152057	1.30695	-0.228019		-0.160551	0.0303135	0.612009	-0.25589
0.2	-0.212851	-0.123191	0.234026	0.525272		-1.03967	0.553997	-0.357969	-1.14351
0.3	0.139727	0.474263	-0.878994	1.12598		-1.09513	0.377702	-1.78132	-0.148229
0.4	0.556884	0.503355	-1.79695	0.918541		0.510654	-0.363592	-0.639552	-0.282084
0.5	0.936753	0.450209	-2.13374	0.622643		-1.06427	-0.590957	-0.731652	0.904895
0.6	-0.0938734	-0.290507	-1.24059	-0.0726525		0.78889	1.07816	-1.27362	-0.0976299
0.7	-0.630434	0.10324	-0.00642944	-1.01576		0.139054	0.0319002	0.811109	0.091947
0.8	-1.04009	-0.15875	1.22431	-1.11716		0.569972	1.26928	0.857821	-1.41759
0.9	0.0550027	-0.128156	1.75274	-0.842371		0.227277	-0.968131	-1.1401	-0.486092
1	0.681673	-0.114803	1.73138	-0.807718		-0.438791	-1.01089	-0.302613	-0.609901
1.1	1.73628	0.507082	0.827554	-0.98532		-0.0655083	-1.32227	-0.786513	-2.33688
1.2	1.5358	1.27266	1.31631	-0.386585		1.17833	-0.330067	-2.592	-1.49818
1.3	0.807653	1.97427	1.78496	0.637505		-0.850735	-0.37976	-0.814228	0.218064
1.4	0.776794	1.42688	2.39945	1.88055		0.206098	1.00305	-0.321122	-0.592502
1.5	0.636256	0.281034	1.97859	3.02199		1.15776	-0.485213	-0.77411	-1.29754
1.6	0.998413	-0.910106	1.06109	3.7448		0.360249	0.917059	0.507519	-1.03183
1.7	1.31659	-1.8597	-0.333762	2.2692		0.579254	-0.145846	0.450982	-2.02545
1.8	0.838495	-1.61488	-0.25698	1.49183		0.128212	-0.141095	-1.29118	0.164467
1.9	-0.554873	-0.317126	-0.135019	0.142957		0.311789	0.956537	-0.380278	-0.428045
2	-0.743941	0.121426	0.228258	0.856864		0.0122408	0.243224	-0.141501	-0.664493
2.1	-0.836132	1.15842	0.556016	1.63019		0.323618	-1.43798	-0.190691	0.449485
2.2	-0.0126113	1.40634	1.00649	2.06221		-0.613214	-0.798094	1.05685	1.27076
2.3	-0.00754601	-0.438668	1.43633	1.05954		-0.239545	0.258179	0.691661	0.800738
2.4	0.382371	-4.13566	0.636382	0.767138		0.900256	0.111461	-1.75338	0.046471
2.5	0.315391	-8.55704	0.398656	0.208491		1.22433	-0.704339	-2.22789	-0.753344
2.6	0.840532	-11.2452	-0.122491	0.443753		0.126067	-0.344387	-3.50899	-1.18289
2.7	0.73211	-12.4043	-1.93368	1.12781		-0.900206	-1.00686	-5.70816	-1.27938
2.8	0.12017	-10.845	-3.82025	-0.0139653		-0.0764904	-0.541967	-5.02889	-3.35888
2.9	-0.603604	-9.3782	-5.62289	-2.05993		-3.47047	-2.61617	-5.97309	-3.68951
3	-0.844848	-9.37966	-8.57148	-2.80267		-5.66437	-10.4926	-7.49323	-4.66358
3.1	-1.14692	-10.7951	-9.2612	-3.29994		-7.17376	-12.5519	-6.97442	-4.4972
3.2	-1.9707	-10.5401	-9.65616	-5.31419		-7.99274	-15.0473	-6.80965	-5.98882
3.3	-2.8794	-11.7747	-10.3451	-5.5436		-9.2131	-14.493	-8.39489	-5.42369
3.4	-2.44027	-12.8742	-9.84477	-6.37075		-11.4132	-15.6283	-7.60959	-6.29899
3.5	-1.94319	-13.1056	-9.14028	-7.16956		-12.1446	-15.8704	-7.41661	-5.3179
3.6	-1.96936	-13.9776	-10.1225	-6.72409		-12.9005	-15.2226	-7.86002	-6.07415
3.7	-1.90747	-14.5102	-10.622	-5.98518		-12.8601	-15.7446	-7.30593	-8.14309
3.8	-2.43267	-13.1523	-10.2774	-5.61632		-14.2036	-14.9878	-6.96871	-7.79015
3.9	-3.76153	-13.0479	-10.8364	-5.41695		-14.7385	-15.5592	-7.94122	-6.22932
4	-3.27385	-12.333	-10.9721	-6.19575		-14.036	-14.8727	-7.66231	-6.55409
4.1	-3.6322	-10.921	-10.8581	-7.77532		-15.9444	-15.2999	-7.38283	-6.73601
4.2	-4.1502	-10.7569	-11.6726	-7.46329		-15.0367	-15.6331	-8.04825	-5.80816
4.3	-4.12021	-11.8237	-12.2773	-7.58744		-16.0793	-15.379	-7.67292	-7.00498
4.4	-3.67408	-12.8864	-11.0249	-6.54921		-15.9081	-15.2646	-7.43911	-6.05303
4.5	-4.80816	-15.3033	-10.9573	-6.17756		-14.9858	-14.7169	-7.86803	-7.2367
4.6	-4.62238	-15.5225	-11.1998	-7.33918		-15.5416	-14.7837	-7.30266	-7.0664
4.7	-4.73199	-14.4308	-10.7298	-7.28098		-14.7523	-14.2394	-7.68515	-6.85027
4.8	-4.73534	-13.5096	-10.4363	-6.10226		-15.5681	-15.4059	-8.73724	-5.89331
4.9	-5.04489	-12.1771	-10.5623	-6.9995		-14.7337	-14.6489	-8.10684	-7.17367
5	-4.86272	-10.858	-10.638	-8.01994		-15.2149	-16.3192	-7.68136	-8.78284
5.1	-5.491	-10.7569	-12.1368	-8.81493		-15.5408	-16.4326	-8.3153	-8.49279
5.2	-5.86205	-11.8237	-13.8749	-9.40319		-16.1534	-14.8226	-7.71619	-6.64215
5.3	-5.52909	-12.8864	-14.2109	-8.46827		-14.8799	-15.4162	-8.03256	-5.91984
5.4	-5.52674	-14.8939	-14.1085	-7.83128		-15.1589	-15.5249	-9.19342	-6.50765
5.5	-6.42145	-15.8225	-12.658	-7.74249		-16.4293	-14.7659	-9.3768	-5.96127
5.6	-6.41147	-16.3123	-11.9218	-7.71445		-16.1465	-15.2793	-8.41824	-6.90333
5.7	-6.1299	-15.2058	-12.1191	-7.60424		-16.4833	-15.6426	-8.55474	-6.07522
5.8	-5.69044	-14.1225	-12.7968	-6.50031		-15.5358	-16.3905	-8.11053	-6.8672
5.9	-4.645	-13.5691	-12.9753	-6.6896		-15.356	-15.2961	-8	-6.83303
6	-4.19289	-13.14	-13.6981	-7.24757		-15.554	-16.0683	-8.59396	-6.90261
6.1	-4.63212	-14.5273	-13.3684	-7.72007		-16.3221	-15.8439	-9.58773	-5.56358
6.2	-4.59624	-15.0253	-13.6824	-8.49627		-15.6721	-15.5181	-8.70293	-6.05985
6.3	-5.16248	-15.187	-12.6733	-9.34372		-16.6325		-8.94893	-7.08559
6.4	-5.19516	-15.1473	-13.1192	-8.3816		-16.1837	-16.7653	-9.24354	-6.31459
6.5	-5.55808	-14.7722	-13.2166	-7.67903		-14.8509		-9.00672	-5.03175
6.6	-4.8938	-13.4292	-13.1894	-6.75297		-18.182	-15.0767	-9.01156	-5.08409
6.7	-4.64925	-13.8941	-13.2505	-5.61047		-14.9941		-9.46463	-6.19571
6.8	-4.81799	-13.14	-12.8937	-5.91251		-15.6714	-15.582	-8.70672	-6.01344
6.9	-5.21288	-14.5273	-12.4791	-7.11419		-16.5215		-8.47332	-6.44386
7	-5.81937	-15.0253	-12.9997	-7.58719		-15.8192	-16.2868	-8.92275	-5.02782
7.1	-6.37974	-15.187	-13.3234	-8.5976		-16.3792		-9.05551	-6.04192
7.2	-5.81707	-15.1473	-13.922	-9.34372		-15.9052	-14.7927	-9.236	-6.17368
7.3	-5.98542	-14.7722	-13.6222	-8.3816		-16.45		-10.3379	-6.88561
7.4	-6.56364	-13.4292	-11.8822	-7.39524		-15.7339	-14.3969	-9.67579	-5.33298
7.5	-6.70127	-13.8941	-10.8964	-6.94127		-17.0369		-9.21285	-5.17246
7.6	-7.51779	-13.14	-10.0714	-6.86275		-14.7248	-15.8635	-9.53376	-6.4784
7.7	-7.32464	-14.5273	-10.9465	-7.46378		-16.4507	-15.9361	-9.31094	-6.31157
7.8	-6.67651	-15.2361	-13.39	-8.78157		-16.6062	-16.3557	-8.82809	-5.78653
7.9	-5.94355	-15.2973	-13.9707	-9.28278		-15.6385	-15.404	-9.75565	-5.30394
8	-5.40964	-13.8419	-14.4425	-8.3816		-16.909	-15.4681	-8.5938	-5.77702
8.1	-4.27998	-12.9231	-14.3162	-7.67903		-16.5863		-8.47312	-5.07249
8.2	-4.72434	-11.843	-13.6952	-6.94747		-17.1303	-16.2436	-8.85882	-5.46857
8.3	-5.55137	-11.5424	-13.732	-5.85697		-16.4125		-8.00045	-4.16699
8.4	-5.92741	-10.4355	-14.4806	-4.58717		-15.6233	-16.0397	-7.86636	-5.08061
8.5	-6.25807	-10.8548	-14.6626	-4.95186		-16.7835	-15.3304	-8.64852	-4.95908
8.6	-6.4457	-10.0454	-15.4222	-5.02461		-16.8644		-7.94301	-5.91456
8.7	-5.63812	-10.2137	-14.9379	-5.4867		-16.4555	-15.4587	-8.18225	-4.97842
8.8	-5.73923	-10.25	-14.2537	-5.69823		-15.8643	-15.4285	-8.76522	-5.65988
8.9	-6.8414	-9.37587	-13.7449	-5.60827		-16.8831	-14.94	-7.80234	-4.49428
9	-5.8599	-8.07004	-12.9307	-4.70546		-17.3184	-15.4614	-8.08804	-5.08627
9.1	-5.40375	-6.59769	-12.6267	-5.38928		-16.6162	-14.7645	-9.38236	-4.88291
9.2	-4.58764	-6.25464	-12.4537	-6.20413		-15.8016	-14.691	-8.23755	-5.1603
9.3	-4.33392	-7.04965	-12.7212	-5.44142		-16.6819	-14.9945	-8.46714	-6.44906
9.4	-5.21993	-7.33891	-12.6075	-4.90738		-15.7256	-14.9964	-9.6273	-7.03381
9.5	-7.13655	-7.19884	-13.9049	-4.27583		-15.0233	-13.896	-8.80602	-5.33268
9.6	-7.06054	-6.61633	-14.0244	-4.33667		-16.2652	-12.7609	-9.37428	-5.81911
9.7	-6.93435	-5.34924	-13.3596	-5.15282		-14.3968	-11.7354	-10.2672	-6.9997
9.8	-6.07599	-4.92455	-13.0346	-5.91877		-12.7842	-8.44655	-8.47769	-5.38955
9.9	-6.3724	-4.51193	-13.1668	-4.63714		-12.8944	-7.50496	-8.54106	-5.24352
10	-6.99612	-4.0728	-12.3814	-3.89275		-12.6919	-4.88993	-9.6689	-4.72476
10.1	-7.21919	-4.52323	-12.3981	-3.06423		-12.6921	-4.60111	-8.02555	-5.33416
10.2	-6.4129	-5.17936	-12.0254	-3.31699		-12.7816	-3.00601	-8.25245	-5.44113
10.3	-5.37156	-5.4923	-11.0157	-3.76268		-11.9605	-2.60809	-8.78871	-6.55331
10.4	-4.08001	-4.77552	-11.3454	-4.05509		-11.8066	-2.31684	-7.65276	-4.99373
10.5	-4.23059	-3.41182	-12.3215	-3.85375		-12.6431	-3.22064	-8.3042	-5.18175
10.6	-4.59265	-3.2374	-12.5374	-3.82056		-12.1166	-1.6553	-9.90141	-7.04398
10.7	-5.25759	-3.42238	-11.7974	-4.21451		-11.9149	-2.36068	-7.89591	-6.26275
10.8	-6.57453	-3.23052	-11.0682	-3.60013		-10.8232	-2.51744	-7.51992	-4.63643
10.9	-6.63245	-2.81854	-10.7991	-3.34417		-10.8366	-1.59141	-8.71457	-4.13727
11	-6.4469	-2.83157	-11.5346	-2.17089		-9.54386	-1.26546	-7.32051	-4.85607
11.1	-5.71312	-2.18954	-12.2292	-2.54696		-11.0833	-0.955921	-7.80276	-4.24572
11.2	-5.10849	-2.81795	-11.4329	-2.41442		-10.0531	-1.14944	-8.8967	-5.43069
11.3	-4.94724	-2.90042	-10.5298	-3.46883		-10.7349		-7.34222	-4.14664
11.4	-6.10815	-2.20694	-10.3263	-3.52999		-10.1855	-1.08502	-6.6381	-5.01185
11.5	-6.00383	-2.29941	-9.83619	-3.82806		-10.3645		-7.94582	-4.65277
11.6	-5.75943	-2.97601	-10.6024	-3.17925		-10.5661	-0.00767006	-6.53828	-4.96049
11.7	-5.1191	-2.95472	-10.9286	-2.94852		-9.99401	-1.83365	-6.51265	-3.78367
11.8	-4.56568	-1.71446	-9.99245	-2.57016		-10.7748	-0.0382611	-7.98405	-3.58152
11.9	-4.70789	-1.32538	-10.2941	-3.00608		-9.67043	0.413431	-6.96941	-5.37177
12	-5.41	-1.81943	-10.2203	-2.91873		-9.92903		-6.32877	-5.82065
12.1	-5.73906	-3.34163	-9.87247	-2.63993		-11.8576	0.204417	-6.81396	-5.05262
12.2	-5.30478	-4.56596	-10.1582	-3.13488		-9.44714		-5.76386	-4.80714
12.3	-4.50123	-4.99037	-10.4965	-2.64195		-9.73872	-0.158826	-6.0176	-5.22319
12.4	-3.62293	-4.02292	-9.72637	-2.76403		-9.36852	-0.864202	-7.34464	-3.1237
12.5	-3.56495	-3.07859	-9.10359	-2.63152		-9.43392	-0.496355	-6.50875	-3.7282
12.6	-4.03393	-3.3049	-8.69407	-2.04072		-9.36381		-5.90444	-2.89995
12.7	-4.7293	-2.844	-8.93191	-1.72535		-8.70897	0.619993	-5.89943	-3.30845
12.8	-5.33915	-1.06774	-7.76605	-2.62415		-9.30844		-5.98554	-2.84323
12.9	-5.58619	0.0928688	-8.23307	-2.90548		-8.83496	0.0437575	-6.16947	-3.66678
13	-5.28757	0.876884	-8.13473	-3.00719		-7.99692	0.00810028	-6.78881	-2.6622
13.1	-4.91193	1.40991	-7.904	-2.6282		-8.97625	-0.789516	-7.42098	-3.64377
13.2	-4.08124	0.0638726	-9.08474	-2.87786		-7.70088		-6.39095	-3.37043
13.3	-3.93539	-1.03543	-9.67221	-2.98755		-8.3187	-1.60676	-5.63517	-2.51949
13.4	-4.24794	-0.867073	-9.36804	-1.88701		-8.89281	-0.304467	-5.99426	-1.43049
13.5	-4.68167	-1.08542	-9.44337	-1.33481		-9.36361	-0.00165491	-4.98852	-2.53228
13.6	-4.34034	-0.421844	-8.28615	-1.58674		-8.51934	0.240855	-4.7893	-4.40738
13.7	-4.15091	-0.0857345	-7.8955	-2.23086		-8.37299		-5.70115	-4.2491
13.8	-2.87114	-0.239967	-8.14531	-2.93849		-8.30516	-0.505513	-4.51973	-3.03678
13.9	-3.43606	-1.20961	-8.19894	-3.08565		-8.8886	-0.283777	-3.64261	-2.1534
14	-4.09825	-0.785008	-9.00204	-2.50918		-6.39594	-0.758278	-4.58702	-2.76001
14.1	-4.39479	-0.349988	-9.25242	-2.40699		-7.87273	-0.684503	-3.82841	-2.47002
14.2	-4.55066	0.337665	-8.45112	-2.87615		-7.41708	-0.0757536	-3.59903	-2.84164
14.3	-4.28762	0.181725	-7.62696	-3.63605		-7.52212	-0.624617	-4.80928	-1.30539
14.4	-3.79473	-0.514709	-7.55982	-2.02304		-7.68368	-1.29693	-4.29451	-2.40185
14.5	-4.57275	-1.88588	-6.27018	-1.12866		-8.00802		-4.4656	-1.66325
14.6	-4.41978	-2.49917	-6.85005	-0.696902		-7.67116		-5.23133	-1.60505
14.7	-4.18472	-2.85468	-7.22852	-0.632116		-8.64942	-1.41867	-4.35776	-0.550209
14.8	-3.90399	-2.50571	-6.79537	-0.845635		-6.45413	0.0303135	-4.44249	-1.37077
14.9	-3.23088	-2.10073	-7.42208	-1.88084		-6.42898		-4.69008	-2.85319
15	-3.793	-1.97623	-8.1818	-1.09206		-6.56096		-3.63909	-2.74474
15.1	-4.85258	-0.891731	-7.71979	-1.85885		-7.20523	0.553997	-2.86833	-0.866553
15.2	-4.25093	-1.20904	-6.71022	-2.21458		-6.22813	0.377702	-2.76852	-0.84493
15.3	-3.4752	-1.50556	-7.15268	-1.83727		-7.04635		-1.8285	-1.44975
15.4	-2.84344	-0.643926	-6.01232	-2.00439		-6.95705		-2.57512	-1.21136
15.5	-2.38668	-0.328136	-6.71691	-1.53889		-6.26272	-0.363592	-3.27809	-1.83467
15.6	-2.37859	0.721386	-7.00686	-0.153021		-7.31989	-0.590957	-3.41784	-0.720063
15.7	-2.68188	1.93321	-7.71938	-0.0890055		-5.21687		-3.32359	-2.21496
15.8	-2.15383	0.427718	-6.0788	0.180055		-6.06068		-4.18736	-2.11948
15.9	-2.12212	-2.21917	-6.23739	0.315796		-6.81815	1.07816	-3.23927	-2.20742
16	-2.56641	-1.53191	-5.2699	0.358203		-4.95521	0.0319002	-3.4371	-1.09975
16.1	-2.84316	-1.67683	-4.24528	0.991079		-5.25797		-3.63034	-1.70594
16.2	-3.58112	-0.874011	-4.09625	0.875022		-4.4631		-3.03123	-0.530927
16.3	-4.28251	0.342605	-5.382	0.755957		-5.76478	1.26928	-3.41097	-1.35699
16.4	-4.34894	-1.09175	-5.45965	0.265065		-5.41771	-0.968131	-3.8968	-0.464124
16.5	-5.43958	-1.26681	-5.01596	0.218359		-5.30199		-2.56798	-1.04831
16.6	-5.05258	-0.255493	-4.89257	1.12598		-5.22629		-2.40577	-2.97423
16.7	-4.11603	0.391622	-4.50026	0.918541		-4.52778	-1.01089	-2.62836	-2.40236
16.8	-3.75485	-0.339085	-4.51714	0.622643		-6.21227	-1.32227	-1.56559	-0.401779
16.9	-3.17894	-0.736614	-6.07482	-0.0726525		-4.20117		-1.96419	-0.296339
17	-3.45517	-2.52944	-7.08533	-1.01576		-5.32727		-3.22386	-1.17237
17.1	-4.36082	-1.41219	-6.35535	-1.11716		-4.56821	-0.330067	-2.80558	-1.15585
17.2	-3.88467	-0.519892	-5.47422	-0.842371		-4.98026	-0.37976	-2.65131	-1.93125
17.3	-3.69247	0.0232835	-5.93934	-0.807718		-4.6958		-2.78367	-0.217013
17.4	-3.2933	0.666345	-5.32509	-0.98532		-5.35067		-0.832256	-1.84964
17.5	-2.85689	-0.0604182	-6.17694	-0.386585		-4.98843	1.00305	-0.0852505	-0.656732
17.6	-3.56314	-1.22831	-6.7149	0.637505		-4.78364	-0.485213	-0.882988	-0.593801
17.7	-3.58894	-2.18196	-5.55134	1.88055		-4.58198		-0.591984	-0.318107
17.8	-2.98499	-1.9736	-5.00646	3.02199		-4.53606		-0.630481	-1.18906
17.9	-2.88373	-2.33258	-5.04498	3.7448		-3.79261	0.917059	-1.79017	-1.28361
18	-1.85296	-1.54704	-4.17029	2.2692		-3.96999	-0.145846	-1.1295	-2.95074
18.1	-0.893107	-0.416353	-4.51448	1.49183		-3.35257	-0.141095	-1.2497	-1.61602
18.2	-0.858981	0.143659	-4.2846	0.142957		-4.15342	0.956537	-1.3046	-1.39455
18.3	-0.686947	0.474263	-3.70483	0.856864		-4.58478		-0.436886	-2.8016
18.4	-1.20537	0.503355	-3.54948	1.63019		-5.07936		-0.520883	-2.0322
18.5	-1.24317	0.450209	-3.01032	2.02977		-4.15699	-0.505513	-1.65222	-1.13482
18.6	-1.27474	-0.290507	-3.36544	1.47713		-5.12403	-0.283777	-1.07741	-0.969051
18.7	-1.4964	0.10324	-3.17765	-0.0368089		-3.21528		-1.44209	-1.41548
18.8	-2.27567	-0.15875	-3.44734	-0.595275		-3.35448		-1.85017	-0.340965
18.9	-2.44293	-0.128156	-4.01384	0.454286		-4.45119	-0.758278	-0.513821	-1.07404
19	-3.10933	-0.114803	-3.81243	2.14519		-3.51389	-0.684503	-0.607172	0.0987139
19.1	-2.55066	0.507082	-4.04825	2.93566		-4.2533		-1.03891	-0.608113
19.2	-2.37749	1.27266	-4.06423	3.7448		-4.24972		-0.500859	-2.7486
19.3	-2.3459	1.97427	-3.12259	2.2692		-3.79804	-0.0757536	-0.810769	-1.92163
19.4	-2.3969	1.42688	-3.14045	1.49183		-3.81935	-0.624617	-1.50202	0.355495
19.5	-2.38064	0.281034	-2.73624	0.142957		-3.18022	-1.29693	-0.7285	0.656308
19.6	-1.90396	-0.910106	-2.62067	0.856864		-3.34667		-0.840549	0.0282389
19.7	-1.32401	-1.8597	-3.46858	1.74613		-3.65035	-1.08502	-1.03504	0.993722
19.8	-1.02671	-1.61488	-2.25227	1.94758		-3.28865		-0.36433	-0.467564
19.9	-2.43139	-0.317126	-1.80337	0.943906		-2.51732	-0.00767006	-1.22648	1.2742
20	-3.17539	0.224559	-1.62462	-0.214722		-3.73226	-1.83365	-0.823188	-0.0602678
20.1	-3.11892	0.817267	-1.22659	-1.68714		-2.29145	-0.0382611	-0.923599	0.189762
20.2	-2.28779	0.628407	-1.65971	-0.849389		-3.3699	0.413431	-0.927323	-0.170927
20.3	-1.32863	-0.67809	-3.59528	0.236014		-2.46722		0.000454898	0.69893
20.4	-1.181	-0.293589	-2.79069	-0.0396351		-4.25619	0.204417	0.226609	-1.21243
20.5	-2.14288	-0.1459	-2.28422	0.407463		-3.37448		-1.78132	-0.00768811
20.6	-2.04045	0.474263	-2.20767	0.397929		-1.96067	-0.158826	-0.639552	-1.32541
20.7	-1.177	0.503355	-2.30081	-0.530525		-2.72939	-0.864202	-0.731652	-0.737004
20.8	-0.55882	0.450209	-2.02315	-1.00634		-2.72025	-0.496355	-1.27362	-0.843983
20.9	-0.427775	-0.290507	-2.57651	-1.08499		-3.84901		0.811109	-1.1072
21	-0.992976	0.10324	-2.58261	-1.04409		-3.29072	0.619993	0.857821	-2.08062
21.1	-1.36978	-0.15875	-2.13182	0.0180282		-3.1493		-1.1401	-0.353585
21.2	-1.25106	-0.128156	-1.63777	0.316928		-2.86666	0.0437575	-0.302613	0.184519
21.3	-1.21153	-0.114803	-2.29175	-0.389316		-3.38185	0.00810028	-0.786513	-1.08446
21.4	-0.743286	0.507082	-2.21335	-0.872883		-2.95852	-0.789516	-2.592	0.108848
21.5	-1.68549	1.27266	-2.30021	-0.256416		-2.59906		-0.814228	0.892347
21.6	-2.42794	1.97427	-2.62586	-0.628875		-2.42568	-1.60676	-0.321122	0.67911
21.7	-1.89924	1.42688	-2.00495	-0.482719		-4.01675	-0.304467	-0.77411	-0.425535
21.8	-1.19332	0.281034	-1.81263	-0.749638		-3.92104	-0.00165491	0.507519	0.235992
21.9	-1.3664	-0.910106	-1.4925	-1.57022		-2.64195	0.240855	0.450982	-0.82883
22	-1.26817	-1.8597	-1.22928	-1.60201		-3.45416		-1.29118	0.707036
22.1	-2.22871	-1.61488	-2.38029	-0.940795		-2.61163	-0.505513	-0.380278	0.467188
22.2	-2.27747	-0.317126	-2.48177	-1.89751		-3.02022	-0.283777	-0.141501	-1.60247
22.3	-1.28709	0.224559	-2.00525	-1.86785		-3.0244	-0.758278	-0.190691	-1.54157
22.4	-0.896818	0.817267	-1.93066	-1.93538		-2.78425	-0.684503	0.42136	0.42237
22.5	-1.4427	0.628407	-1.11012	-1.41608		-2.58133	-0.0757536	1.39789	0.766783
22.6	-1.08536	-0.67809	-0.601678	-0.44074		-2.24078	-0.624617	0.479657	0.606807
22.7	-0.960114	-0.293589	-1.64708	-0.0620057		-2.32855	-1.29693	0.150225	0.961275
22.8	-0.429615	-0.1459	-2.00093	0.371054		-2.87145		-0.285626	-0.426104
22.9	0.399488	0.474263	-1.63633	0.449437		-1.97695		-1.08847	0.167778
23	-0.143925	0.503355	-0.539538	-0.420393		-1.54277	-1.41867	-1.50202	-0.507267
23.1	-1.40211	0.450209	-0.299194	-1.16139		-3.07325	0.0303135	-0.7285	0.177792
23.2	-0.861444	-0.290507	0.369911	-1.50841		-1.50869		-0.840549	1.44
23.3	-0.65654	0.10324	-0.118888	-1.35957		-3.58391		-1.03504	2.62203
23.4	-0.430737	-0.15875	-0.735072	-0.141239		-2.29459	0.553997	-0.36433	2.29732
23.5	0.614055	-0.128156	-1.56031	0.263911		-2.76836	0.377702	-1.22648	0.237796
23.6	0.477982	-0.114803	-0.980777	0.712164		-1.85109		-0.823188	-1.86077
23.7	-0.569795	0.507082	-0.721272	0.284672		-3.40399		-0.923599	-1.11422
23.8	-1.65369	1.27266	-0.527802	-0.657552		-2.02382	-0.363592	-0.927323	-0.475397
23.9	-2.07745	1.97427	-1.29637	-0.674486		-2.56563	-0.590957	0.000454898	-0.457614
24	-2.64653	1.42688	-0.68056	-0.872899		-2.03972		0.226609	-1.38624
24.1	-3.30079	0.281034	-0.559118	-0.93636		-2.3406		-1.78132	-1.13873
24.2	-2.71026	-0.910106	0.527547	-0.375397		-1.84957	1.07816	-0.639552	-0.511284
24.3	-1.58256	-1.8597	-0.0470592	-0.591941		-2.53379	0.0319002	-0.731652	-0.193817
24.4	-1.63451	-1.61488	0.336314	-1.68233		-1.19872		-1.27362	-1.82645
24.5	0.111695	-0.317126	0.310138	-1.70808		-2.30806		0.811109	-0.753994
24.6	0.334913	0.127714	0.986135	-1.19534		-2.04097	1.26928	0.857821	-1.49475
24.7	0.139727	1.1447	1.48244	0.413659		-1.86747	-0.968131	-1.1401	-0.905278
24.8	0.556884	0.566242	0.889223	0.527702		-1.68387		-0.302613	-1.32244
24.9	0.936753	-0.284328	-1.99447	0.30777		-2.15222		-1.27999	-0.604922
25	-0.0938734	-1.13098	-2.01089	0.119057		-2.0843	-1.01089	-1.28338	-1.61167
25.1	-0.630434	-1.67536	-1.75724	-1.02949		-2.52775	-1.32227	-0.157422	-0.639309
25.2	-1.04009	-1.61488	-1.03179	-1.25596		-2.518		-0.39433	-2.14155
25.3	-0.0273535	-0.317126	0.00424083	-0.544052		-1.86366		-1.10282	-3.7643
25.4	0.96475	0.224559	-0.184329	-1.14494		-1.00446	-0.330067	-0.693273	-2.79566
25.5	1.89229	0.817267	-1.17224	-0.600797		-2.12654	-0.37976	-1.50202	-0.782953
25.6	1.18198	0.628407	-1.07878	0.444232		-2.6097		-0.7285	-0.314868
25.7	0.0344372	-0.67809	-0.271563	-0.00881731		-1.97994		-0.840549	-0.389263
25.8	-0.461	-0.293589	-0.0900399	0.461745		-1.19452	1.00305	-1.03504	-0.000191621
25.9	-0.235527	-0.1459	-0.57293	0.549207		-1.56311	-0.485213	-0.36433	-0.613068
26	0.117383	0.474263	-1.86559	0.20839		-1.46803		-1.22648	0.622225
26.1	1.34776	0.503355	-2.85741	0.082436		-1.43974		-0.823188	-1.27132
26.2	1.31659	0.450209	-2.94749	-0.997395		-1.17715	0.917059	-0.923599	-2.41182
26.3	0.838495	-0.290507	-1.3431	-1.96345		-2.38084	-0.145846	-0.927323	-2.10579
26.4	-0.554873	0.10324	-0.69271	-0.955255		-1.31025	-0.141095	0.000454898	-0.981358
26.5	-0.743941	-0.15875	0.0137308	-1.36771		-1.21327	0.956537	0.226609	1.13171
26.6	-0.836132	-0.128156	-0.12222	-1.58906		-2.23303		-1.78132	1.9419
26.7	-0.0126113	-0.114803	0.207886	-1.01123		-2.17299		-0.639552	0.908174
26.8	-0.00754601	0.507082	0.452241	-1.10396		-1.01728	-0.505513	-0.731652	0.084218
26.9	0.371556	1.27266	1.29609	-1.18317		-1.91325	-0.283777	-1.27362	-1.60247
27	0.242628	1.97427	1.52859	0.577435		-0.772815		0.811109	-1.54157
27.1	1.05328	1.42688	1.80949	0.521717		-1.89587		0.857821	0.42237
27.2	0.72537	0.281034	1.16729	-0.474558		-1.40006	-0.758278	-1.1401	0.766783
27.3	0.757068	-0.910106	0.533461	-1.29948		-2.00283	-0.684503	-0.302613	0.606807
27.4	-0.292715	-1.8597	-0.104709	-0.668014		-2.12713		-1.27999	0.961275
27.5	0.139727	-1.61488	-0.499375	-1.23521		-1.87181		-1.28338	-0.426104
27.6	0.556884	-0.317126	-1.18342	0.0539948		-2.21411	-0.0757536	-0.157422	0.167778
27.7	0.936753	0.224559	-0.317206	0.532894		-1.64111	-0.624617	-0.39433	-0.507267
27.8	-0.0938734	0.817267	0.672721	0.17231		-1.34679	-1.29693	-1.10282	0.177792
27.9	-0.630434	0.628407	1.34868	-0.357557		-1.87906		-0.693273	1.44
28	-1.04009	-0.67809	1.45511	0.452898		-0.971408		-1.50202	2.62203
28.1	0.0550027	-0.293589	0.758485	-0.602981		-1.34857	-0.330067	-0.7285	2.29732
28.2	0.681673	-0.1459	0.146728	-0.226166		-0.989684	-0.37976	-0.840549	0.237796
28.3	1.73628	0.474263	-0.0762485	-0.267883		-0.715872		-1.03504	-1.86077
28.4	1.5358	0.503355	0.683894	-0.00371961		-1.43947		-0.36433	-1.11422
28.5	0.807653	0.450209	0.325763	0.752416		-1.31763	1.00305	-1.22648	-0.475397
28.6	0.776794	-0.290507	-0.115859	1.25842		-1.48434	-0.485213	-0.823188	-0.457614
28.7	0.636256	0.10324	-0.581415	0.240047		-1.65716		-0.923599	-1.38624
28.8	0.998413	-0.15875	-0.285028	0.352391		-1.51938		-0.927323	-1.13873
28.9	1.31659	-0.128156	-0.550763	0.541028		-2.25377	0.917059	0.000454898	-0.511284
29	0.838495	-0.114803	-0.0590504	-0.645724		-0.332309	-0.145846	0.226609	-0.193817
29.1	-0.554873	0.507082	0.419016	-0.732603		-2.73721	-0.141095	-1.78132	-1.82645
29.2	-0.743941	1.31952	2.07799	-0.420409		-1.75777	0.956537	-0.639552	-0.753994
29.3	-0.836132	1.73179	2.05427	-0.294904		-0.865613		-0.731652	-1.49475
29.4	-0.0126113	1.309	1.95384	0.00694606		-0.744149		-1.27362	-0.905278
29.5	-0.00754601	0.587187	0.506934	0.355691		-1.56397	-0.505513	0.811109	-1.32244
29.6	0.371556	0.567193	-0.21239	-0.625306		-2.14599	-0.283777	0.857821	-0.604922
29.7	0.242628	1.09361	-0.330209	-0.921175		-1.04123		-1.1401	-1.61167
29.8	1.05328	1.97427	1.11549	0.107275		-0.612705		-0.302613	-0.639309
29.9	0.72537	1.42688	0.844386	0.487452		-1.20388	-0.758278	-0.844169	-2.14155
30	0.757068	0.281034	0.610496	0.721887		-1.08934	-0.684503	-2.20105	-3.7643
30.1	-0.292715	-0.910106	0.666852	-0.0310479		-0.616177		-1.33538	-2.79566
30.2	0.139727	-1.8597	0.586141	-0.623523		-1.53978		-0.395721	-0.782953
30.3	0.556884	-1.61488	0.20622	-1.41081		-1.10743	-0.0757536	-1.05313	-0.314868
30.4	0.936753	-0.317126	0.178394	-0.761804		-0.970121	-0.624617	-1.28274	-0.389263
30.5	-0.0938734	0.224559	-0.0269408	-0.987378		-0.953285	-1.29693	-0.639552	-0.000191621
30.6	-0.630434	0.817267	-0.142745	0.483153		-1.04819		-0.731652	-0.613068
30.7	-1.04009	0.628407	1.14271	0.577565		-0.98064	-1.08502	-1.27362	0.622225
30.8	0.0550027	-0.67809	1.08552	0.670633		-1.77838		0.811109	-1.27132
30.9	0.681673	-0.433203	0.469399	0.389518		-1.16248	-0.00767006	0.857821	-2.41182
31	1.73628	0.264713	-0.878994	0.00952004		-1.2889	-1.83365	-1.1401	-2.04399
31.1	1.5358	0.314258	-1.79695	-1.11901		-0.895754	-0.0382611	-0.302613	-0.217405
31.2	1.08612	0.639186	-2.13374	-0.716827		-1.28455	0.413431	-1.27999	-0.373068
31.3	0.23573	1.05899	-1.24059	-0.06034		-1.56184		-1.28338	-1.29246
31.4	0.320473	0.987075	-0.00642944	-0.365572		-1.39	0.204417	-0.157422	-1.16811
31.5	-0.426314	1.97427	1.22431	-0.23852		-0.887188		-0.39433	-1.40789
31.6	0.294865	1.42688	1.75274	-0.756703		-1.75496		-1.10282	-0.905278
31.7	0.539496	0.281034	1.73138	-1.08228		-1.86809	-1.41867	-0.693273	-1.32244
31.8	0.936753	-0.910106	0.827554	-1.47852		-0.75012	0.0303135	-1.50202	-0.604922
31.9	-0.0938734	-1.8597	1.31631	-1.38658		-1.40158	0.553997	-0.7285	-1.61167
32	-0.630434	-1.61488	1.78496	-2.47881		-1.34586	0.377702	-0.840549	-0.639309
32.1	-1.04009	-0.317126	2.39945	-1.85776		-1.43018		-1.03504	-2.14155
32.2	0.0550027	0.224559	1.97859	-1.45912		-0.962202		-0.36433	-3.7643
32.3	0.681673	0.817267	1.06109	-1.35004		-0.620702	-0.363592	-1.22648	-2.79566
32.4	1.73628	0.628407	-0.333762	-1.1311		-0.144611	-0.590957	-0.823188	-0.782953
32.5	1.5358	-0.67809	-0.17153	-0.365576		-0.681239		-0.923599	-0.314868
32.6	0.878931	-0.696803	-0.351609	-0.807351		-1.38247		-0.927323	-0.389263
32.7	0.661072	0.320443	0.173668	-0.0354025		-1.80315	1.07816	0.000454898	-0.000191621
32.8	0.621466	1.51524	0.472763	0.550502		-0.0600073	0.0319002	0.226609	-0.613068
32.9			0.831686	0.470147		-0.760605		-1.24059	0.622225
33			1.12229	0.350053		0.0495582		-1.5958	-1.27132
33.1			0.469399	-0.00788752		-1.0377	1.26928	-2.41721	-2.41182
33.2			-0.878994	-0.803625		-1.1033	-0.968131	-1.60238	-2.10579
33.3			-1.79695	-1.53954		-1.43667		-0.535475	-0.981358
33.4			-2.13374	-1.6495		-1.39181		-1.28841	1.13171
33.5			-1.24059	-1.53944		-1.26285	-1.01089	-0.639552	1.9419
33.6			-0.00642944	-1.24881		-1.27833	-1.32227	-0.731652	0.908174
33.7			1.22431	-1.67051		-0.479957		-1.27362	0.084218
33.8			1.75274	-0.776803		-1.16848		0.811109	-1.60247
33.9			1.73138	-1.39001		-1.50732	-0.330067	0.857821	-1.54157
34			0.827554	-1.24802		-1.54485	-0.37976	-1.1401	0.42237
34.1			1.31631	-0.461947		-0.995598		-0.302613	0.766783
34.2			1.78496	0.185886		0.173357		-1.27999	0.606807
34.3			2.39945	-0.315296		-0.583192	1.00305	-1.28338	0.961275
34.4			1.69704	0.535379		-1.39357	-0.485213	-0.157422	-0.34766
34.5			1.49427	-0.238621		-1.79516		-0.39433	0.0910651
34.6			0.558088	-0.421368		-2.45253		-1.10282	-0.585631
34.7			0.682609	0.0399599		-1.0681	0.917059	-0.704933	0.116265
34.8			0.501704	-0.266038		-0.901318	-0.145846	-1.41424	-0.660227
34.9			0.135458			-0.174088		-0.741345	-0.303146
35						-1.42284			-0.470867
35.1						-0.495175	-0.141095		-1.34928
35.2						-0.895099	0.956537
35.3						-0.517063
35.4						-0.865283
35.5						-1.32675	0.243224
35.6						-1.05618	-1.43798
35.7						-0.26601
35.8						-1.00985
35.9						-0.64396	-0.798094
36						-0.878586	0.258179
36.1						-1.14429

[truncated: 2 more sheets: Fig 3i, Fig 3i - Statistics]
