# Supplementary material for: Ligand-specific activation trajectories dictate GPCR signalling in cells
Source: Nature. 2026 Jan 14;650(8103):1053–62. doi: 10.1038/s41586-025-09963-3 (PMC12935549; doi:10.1038/s41586-025-09963-3)
Supplement: Supplementary file 11 — Source Data Fig. 5 [file 41586_2025_9963_MOESM11_ESM.xlsx]

## Sheet: Fig 5b
ACh (1mM )	Gi1		Gi2		Gi3		GoA		GoB		Gz		G15		Ggust		Gq		G11		G12		G13		GsL		GsS
time [min]	mean	SEM	mean	SEM	mean	SEM	mean	SEM	mean	SEM	mean	SEM	mean	SEM	mean	SEM	mean	SEM	mean	SEM	mean	SEM	mean	SEM	mean	SEM	mean	SEM
-3.04688	100.323	0.411114	100.788	3.44062	99.9081	1.33095	99.6732	3.00473	100.356	0.418935	100.242	0.875883	99.8615	0.816402	101.071	0.344228	99.1283	0.566071	100.056	0.568753	101.222	0.974097	100.664	1.30996	99.3245	0.562695	101.236	1.01338
-2.4375	100.596	0.467087	100.564	4.54225	99.8546	1.53181	100.461	2.44354	100.37	0.957544	100.252	0.902498	98.8861	0.86486	99.8388	1.24934	98.9194	1.4682	101.478	0.876557	97.9841	0.4307	100.849	1.02465	99.9101	0.43696	97.928	1.66955
-1.82813	99.6588	0.342538	97.286	2.64146	99.9899	1.4787	100.618	1.29656	100.86	0.52788	99.7725	0.740315	99.5124	1.15851	99.5675	0.655985	101.173	0.699968	98.9987	0.413902	98.8263	1.81787	96.1447	1.54547	101.44	0.071819	101.983	1.20278
-1.21875	99.6714	0.558086	97.7811	3.13484	99.4253	1.52279	99.2847	2.17347	101.131	0.172134	99.1783	0.717314	99.6184	0.792576	100.379	0.613628	99.6987	0.916728	99.6307	0.970141	99.6888	0.528266	101.167	0.8668	100.397	0.345862	99.72	1.52686
-0.60938	100.602	0.170229	100.518	4.62109	100.822	1.37561	99.9628	2.02427	100.21	0.487479	100.555	0.972445	99.1317	0.567151	99.144	0.417213	101.081	0.459204	99.8365	0.631355	102.279	0.720631	102.297	1.22736	98.9284	0.230438	100.522	0.468373
0	76.8469	0.184077	84.0155	1.75961	87.7283	1.13384	84.2173	0.785112	80.908	0.645282	86.24	1.5586	90.6079	0.752864	97.9727	0.672036	97.4743	0.886708	99.3069	1.62485	97.6971	2.07427	98.7122	1.31176	96.2502	1.30352	99.961	0.841301
0.75	78.1142	0.183721	83.395	0.803915	87.6908	1.28771	82.536	0.573925	80.3011	0.691852	85.6507	1.47344	90.7181	1.62969	98.8377	1.54915	97.2747	0.546595	98.9345	1.63218	97.6489	0.195565	98.4133	1.01361	95.2318	0.461727	100.071	1.77531
1.5	78.3651	0.37682	82.1941	1.90859	88.318	1.44703	82.063	0.260299	79.5073	0.597448	82.8358	1.20718	88.6349	0.998122	98.0358	0.612894	98.5345	0.331892	98.6874	0.869029	97.2417	1.46287	99.5331	0.801528	98.8191	0.785971	102.402	1.14334
2.25	77.9963	0.387294	82.4894	1.4935	88.2169	0.714813	83.1484	0.288192	79.3183	0.28697	80.9462	1.40396	89.84	1.64712	98.762	1.08162	97.7927	1.2787	99.7442	1.25074	94.4056	0.0935969	97.5034	1.82617	96.2431	0.468973	101.384	1.8334
3	78.4895	0.0776246	83.2424	0.827806	88.0183	1.03263	82.0023	0.00089495	79.8738	0.719246	79.6532	1.05326	90.5046	0.787568	99.5043	0.715139	97.4185	1.2892	99.7964	1.33707	98.9021	1.47272	99.641	1.39565	97.0516	0.901902	100.326	2.2995
3.75	79.3775	0.0824486	82.0223	0.711206	87.5497	1.18616	82.481	0.553542	79.2589	0.625168	78.6631	1.21014	88.8187	0.988163	99.6399	0.276859	98.3732	0.442844	98.6666	1.40926	97.8639	0.942264	101.706	1.37433	99.9489	0.629722	101.07	1.55248
4.5	79.2491	0.561483	82.0961	1.02246	88.4173	0.992913	82.3368	0.146368	79.389	0.913772	78.2922	1.25735	90.3826	0.720105	97.8037	1.79787	98.3566	1.58057	98.1419	1.3097	97.6365	0.0888568	99.3805	1.17061	99.5132	0.0347501	102.551	2.37619
5.25	78.9888	0.42468	81.391	0.667374	89.0523	1.10777	80.3965	0.479258	79.3823	0.657713	77.8346	1.2559	89.6596	1.26828	101.116	1.29558	97.7231	0.790711	99.4703	1.7823	98.9378	1.07897	101.259	1.28969	96.4377	1.66184	100.851	1.48712
6	78.94	0.223445	84.0655	0.898256	89.7722	1.11443	80.8405	1.38842	78.2085	0.329237	77.8097	1.15057	90.8869	1.14317	99.83	0.587787	98.0777	0.622971	99.0884	1.88168	98.1113	3.28657	99.9293	0.947004	99.3666	0.235781	100.634	1.82451
6.75	79.1036	0.143188	82.7986	0.398822	89.8514	1.34831	81.3771	0.258484	78.3629	0.542711	77.0578	1.04765	90.5144	1.20849	97.8332	0.69032	98.1825	0.879965	99.159	1.74704	93.929	0.5574	100.235	0.76815	97.5736	0.819787	99.1503	1.49254
7.5	79.9362	0.119064	82.7668	1.10685	89.1345	0.997482	80.2874	0.654754	78.3177	0.45783	76.1266	0.806409	92.0944	1.04684	99.49	0.502695	97.604	1.21105	100.026	1.78784	101.113	0.0797905	100.476	0.544957	98.3434	0.6294	100.183	1.34743
8.25	79.5851	0.136386	81.9436	1.47017	88.8842	1.38964	81.8016	0.461351	78.2426	0.732493	76.3534	0.928328	90.4576	1.09201	97.7969	2.07699	97.1046	1.01285	99.018	1.23929	99.7232	0.589816	99.1314	1.44695	98.2397	0.75824	101.528	2.04748
9	79.1712	0.295269	83.0771	1.08209	89.7746	1.34375	80.7404	0.537327	77.9253	1.01232	76.9059	1.1363	90.7263	1.50075	99.0422	0.679066	96.725	0.581425	99.3116	1.09743	99.2879	2.20839	99.2634	1.16627	99.6274	0.668142	99.5226	1.69772
9.75	80.5812	0.312702	82.6303	0.681579	90.1308	1.22642	80.4876	0.859482	78.5091	0.575828	76.7364	1.07592	92.0048	1.41757	99.1151	1.49191	99.3826	0.860278	98.4064	1.55422	99.333	2.39891	99.3342	2.10477	101.659	0.071812	99.9649	1.08292
10.5	80.1628	0.249042	82.205	1.05084	89.0201	1.1487	80.1696	0.23019	78.5482	0.256577	77.2725	1.28701	93.2698	0.922855	97.4034	1.48634	96.2984	1.22127	100.065	1.05746	95.2018	1.99601	95.739	0.720528	100.372	0.635581	99.4561	1.38131

## Sheet: Fig 5c
Ixo (1µM )	Gi1		Gi2		Gi3		GoA		GoB		Gz		G15		Ggust		Gq		G11		G12		G13		GsL		GsS
time [min]	mean	SEM	mean	SEM	mean	SEM	mean	SEM	mean	SEM	mean	SEM	mean	SEM	mean	SEM	mean	SEM	mean	SEM	mean	SEM	mean	SEM	mean	SEM	mean	SEM
-3.04688	101.994	0.938833	99.4975	1.05014	98.9833	0.515303	98.9126	0.855005	99.988	0.211771	99.406	0.71465	99.252	1.93278	99.9255	1.05652	101.361	2.5498	99.6303	1.81154	99.0588	1.05691	99.283	0.286222	99.67	1.14517	99.419	0.273565
-2.4375	99.9735	0.428881	100.473	0.289355	100.207	0.665019	99.881	0.118258	99.3043	0.67725	100.544	0.416444	99.9279	0.664937	98.8871	0.571543	98.3272	2.49661	100.878	0.318084	99.5308	1.16799	100.102	0.452889	99.9736	0.816988	99.9138	1.55738
-1.82813	98.4594	0.0234018	99.7955	0.991322	98.7984	1.28586	99.8399	0.262187	100.404	0.384012	99.9744	0.673695	100.39	1.19211	100.35	0.262087	99.6359	1.62128	99.3752	1.03837	99.972	1.4802	99.6556	0.531563	100.722	1.47968	99.5855	0.24386
-1.21875	100.633	0.725307	100.552	0.158846	99.7051	0.784326	99.565	0.289782	100.16	0.944036	99.4966	0.566913	98.6502	1.20589	101.287	0.206232	99.9295	0.784935	100.339	1.03412	99.6602	1.22331	99.6778	1.29143	100.107	0.727921	100.575	1.36978
-0.60938	98.9401	0.626863	99.682	0.0375135	98.7663	0.760223	101.801	0.521668	100.143	1.24498	100.579	0.524367	99.8413	1.67014	99.5503	0.536494	100.746	0.743263	99.7771	1.59931	101.778	0.57784	101.282	0.77333	99.5275	0.350399	100.506	0.673008
0	75.3812	0.209791	77.4347	0.190476	86.6	1.74789	80.9879	0.126218	79.6412	0.432912	80.7754	0.131399	89.2152	2.38244	98.8919	0.575118	100.815	0.382509	98.8942	0.479089	99.0302	1.43039	96.5833	1.03854	100.708	1.05027	100.764	1.14689
0.75	74.7237	1.13308	77.6921	0.0935445	85.3015	2.51417	79.6668	0.52731	78.4881	0.0114006	78.5605	0.0481619	85.9857	1.95626	96.004	0.3659	98.3979	1.24842	97.4718	0.50212	97.3617	0.825481	97.6628	0.895006	99.8915	1.30314	101.041	0.995348
1.5	76.5814	1.59145	77.1499	0.26181	85.8594	2.1176	78.5456	0.324899	77.4083	0.188294	75.9705	0.137761	84.7677	1.18716	99.3833	0.507382	98.1912	1.03801	98.1935	1.34232	97.6365	0.475154	98.0827	1.13987	99.7575	1.73088	99.8075	0.795646
2.25	75.6639	0.767182	77.2865	0.741152	85.5296	2.05383	78.2863	0.116776	75.9747	0.385564	73.6983	0.399305	82.639	1.78661	96.7187	0.821075	98.4929	2.2482	98.6805	0.929559	98.855	0.0438001	98.9516	0.835028	100.332	1.30153	99.1341	0.693286
3	75.4499	0.394713	77.6166	0.460436	85.2934	1.1357	78.327	0.823848	77.1803	0.348202	73.3444	0.337834	84.3822	2.57181	100.031	0.272852	98.9876	1.92633	99.2113	1.07807	96.1122	2.3668	97.8039	0.175811	100.593	1.23568	99.561	0.0515685
3.75	76.4222	0.301061	77.8891	0.10351	85.8374	1.81152	78.459	0.305363	76.1041	0.774951	72.2008	0.328029	83.048	0.79626	96.4965	0.0254742	100.561	1.00973	98.8364	1.48935	98.2558	0.911355	99.8591	0.925961	100.34	1.532	100.91	1.80587
4.5	74.8576	0.721385	77.2233	0.020137	85.5182	1.40728	76.1994	1.01281	74.903	0.534234	72.5722	0.258042	84.0556	1.37629	99.283	0.115782	98.9494	0.771783	99.738	0.0757624	100.198	1.29868	99.496	1.32071	100.983	0.584865	99.4071	1.32155
5.25	74.601	0.428262	77.7899	0.118516	86.0888	1.04008	76.6911	0.245715	74.1308	0.171827	71.3183	0.3201	85.9818	1.69292	99.0174	0.945206	99.5312	2.28874	98.6979	1.36849	100.37	1.11292	100.024	0.69816	100.161	1.20918	100.274	0.350637
6	77.5793	0.252265	78.0103	0.312095	86.4474	1.85357	76.833	0.71372	75.0698	0.183148	71.0083	0.699397	86.576	1.01355	97.3897	0.117884	97.8964	2.07771	98.505	0.552484	100.684	1.60738	98.2361	0.134974	102.382	2.07321	99.3491	1.80211
6.75	76.5941	0.777836	77.3994	0.17222	86.2154	1.50114	75.9693	0.136975	73.8404	0.639824	70.9794	0.610002	82.3111	2.58904	99.1573	0.574827	99.1994	1.58718	98.7632	1.41548	99.6309	0.594434	97.606	0.524254	100.309	1.74427	102.877	2.19805
7.5	76.412	0.341515	77.6952	0.692458	86.4931	0.718712	75.6854	0.639486	73.7257	0.875569	70.7392	0.272362	85.2606	1.68675	98.1276	0.0867584	98.1044	2.57174	100.518	0.11518	99.9324	0.145724	97.5603	1.04177	102.585	1.11227	98.7129	0.858518
8.25	75.2345	0.821934	78.0437	0.488286	87.0214	0.941738	75.907	0.495382	74.0662	0.0642656	71.6487	0.11025	83.6638	1.39797	99.0072	1.16015	100.086	0.567423	97.8458	0.637469	100.27	0.737343	98.3228	1.39367	100.622	0.100865	99.1125	1.92434
9	77.8638	0.548812	78.6288	0.70085	87.0032	0.734571	74.8082	0.0364211	72.9733	0.509711	71.2206	0.0974158	85.0453	0.540795	97.0011	0.812834	98.5777	2.00191	98.7089	0.695243	97.8949	0.499626	97.3833	1.26268	99.5097	1.17063	98.598	0.0883442
9.75	78.1824	0.700222	78.187	0.761144	87.6982	1.05929	74.8712	0.640304	73.2092	0.33702	71.756	0.186045	80.4509	0.772828	97.3952	0.77965	99.7825	1.70089	97.7658	0.48671	100.036	0.362381	98.3105	1.37669	100.1	1.08845	99.7432	0.151559
10.5	77.3353	0.349356	78.4713	0.069694	87.5646	0.832782	75.1532	0.391717	72.8793	0.826824	71.2103	0.147205	83.3296	0.923635	96.8238	0.439722	98.217	0.885243	99.1262	0.967369	99.5724	0.196341	98.0796	1.10776	98.8554	0.711269	101.436	0.895215

## Sheet: Fig 5d
Arec (1mM )	Gi1		Gi2		Gi3		GoA		GoB		Gz		G15		Ggust		Gq		G11		G12		G13		GsL		GsS
time [min]	mean	SEM	mean	SEM	mean	SEM	mean	SEM	mean	SEM	mean	SEM	mean	SEM	mean	SEM	mean	SEM	mean	SEM	mean	SEM	mean	SEM	mean	SEM	mean	SEM
-3.04688	99.7718	0.169516	99.9794	1.06123	99.3103	0.280057	98.7932	0.24088	99.9896	1.28005	100.241	0.444357	99.167	0.314247	100.335	0.0492695	101.049	0.853156	99.4471	1.2231	98.7925	1.04252	99.4342	0.895001	100.195	0.536035	100.991	0.691339
-2.4375	100.084	0.160481	98.9755	0.819283	100.211	0.524782	99.428	1.69987	99.9254	1.06231	99.5448	0.780036	100.394	1.41637	100.417	0.659112	100.668	0.42811	99.4986	1.02225	100.535	2.11568	99.714	1.90872	99.9047	0.714142	99.8949	0.33751
-1.82813	99.613	0.880183	100.696	0.723128	100.356	0.365109	100.338	0.608983	100.382	1.03175	99.1759	0.566084	99.4246	0.774459	99.8157	0.468753	99.0003	0.055593	100.62	1.05236	99.4436	0.155454	101.003	0.414635	98.7753	0.725358	99.8729	0.188264
-1.21875	100.49	0.68413	99.4275	0.759692	99.6145	0.650068	100.683	2.20213	100.119	0.734575	100.227	0.5	100.958	0.384773	99.6091	0.266181	100.096	0.497808	100.324	1.30127	99.9306	0.467374	99.9026	1.72126	100.801	2.00944	99.0429	0.311033
-0.60938	100.041	0.468597	100.921	0.497846	100.508	0.261851	100.758	0.0985295	99.5837	0.690758	100.811	0.611973	100.056	0.92781	99.8234	0.592327	99.1866	0.704913	100.11	1.44271	101.298	0.805021	99.9463	0.811516	100.324	1.06897	100.198	0.625391
0	81.9062	0.393869	86.0883	2.06056	89.9054	0.972424	86.2512	0.603338	78.235	0.748519	95.0029	1.16662	93.5885	1.31257	99.5798	1.87152	95.873	0.405055	98.3941	1.27945	100.426	1.16572	98.6275	0.906869	98.0251	0.611458	95.448	0.739918
0.75	82.4171	0.122933	85.0811	1.54849	91.2792	0.255519	83.0025	1.80683	77.9544	0.837957	93.3602	0.248494	93.3103	1.08692	98.4013	2.07109	97.4267	0.0353142	98.1882	0.770092	98.6131	0.202151	99.3581	2.1842	98.8634	0.655072	97.2976	1.26315
1.5	82.088	0.278602	84.8182	0.867241	92.0071	0.626276	82.1958	0.838585	77.48	0.847047	91.1797	0.447743	91.8882	0.831649	97.2658	1.53461	97.1772	0.0304623	99.135	0.88045	100.711	0.691254	98.5283	1.57797	98.3847	0.757606	97.8066	0.468692
2.25	81.8565	0.719163	84.9503	1.61345	91.1263	0.199332	81.2699	0.131676	77.1548	0.70323	89.5516	0.352594	91.4539	0.908212	96.3218	1.29098	95.1798	0.177086	98.3273	0.933733	99.327	1.77396	99.2537	1.86435	98.3009	0.654199	98.269	0.123364
3	81.7103	0.189776	85.0956	1.55845	91.6821	0.529659	79.8247	0.3962	76.6421	1.02137	87.9142	0.393486	90.7324	1.34382	98.6317	1.17226	97.2823	0.0507939	98.9093	0.485682	100.079	1.29759	99.811	1.13869	97.4279	0.39744	97.8112	0.603221
3.75	82.8154	0.731628	86.241	1.55314	91.4099	1.03037	81.3546	0.1446	75.4328	1.26858	84.5284	0.455456	92.4342	0.93736	95.2519	0.919435	97.0169	0.322325	98.173	0.361396	100.952	0.026223	99.9841	0.431723	99.5664	1.16976	97.4768	0.364894
4.5	83.3223	0.499928	85.0068	0.51029	92.308	0.0996693	80.4097	0.398536	75.8534	1.13924	85.5938	0.903203	90.4932	1.06344	97.0195	1.59	96.9694	0.0252806	98.2939	1.14589	99.8601	0.959516	99.9352	1.30974	98.9634	1.20646	97.9317	0.344739
5.25	82.7589	0.0238385	86.9572	1.40137	92.9256	0.120776	81.4284	0.436083	74.3559	0.751476	83.9738	2.22418	91.6003	0.98298	98.4097	1.59497	97.6049	0.223366	98.9727	1.14145	99.1586	0.883372	99.8337	0.893679	98.8215	0.299594	96.1912	0.0279585
6	81.9609	0.472881	84.7691	1.27074	91.5535	0.973793	80.0783	0.865007	74.8603	1.0651	83.9694	0.405927	91.447	0.941117	96.7288	0.386741	97.5676	1.77213	99.7629	0.670975	97.4415	1.25207	100.212	0.479462	99.2505	1.20071	96.5005	0.255651
6.75	82.6058	0.428121	83.2699	0.350065	92.8174	1.23969	79.2953	1.14404	74.3207	0.842889	81.6864	0.163997	91.9237	0.867419	95.3074	0.726748	97.692	0.0688819	99.1594	1.11894	98.8722	1.20658	101.192	0.648949	99.047	1.6332	96.8417	0.297102
7.5	82.7245	0.575399	83.5449	0.422679	93.6765	0.65663	80.1817	0.533009	74.3039	0.627152	81.1791	1.14294	92.5169	1.34758	98.7309	0.967277	97.0451	0.492922	99.8332	1.30137	100.802	1.21334	100.165	0.644976	98.1687	1.13333	98.9947	0.772559
8.25	82.6246	0.295766	84.7606	1.49036	92.5277	1.36035	80.7255	0.918076	73.8473	0.420337	80.8907	0.307516	92.9626	1.31036	99.0888	1.23855	97.4769	0.215642	99.8633	0.112297	98.641	0.112182	100.4	1.19318	98.6845	0.167029	97.689	0.574106
9	83.2283	0.408933	86.3922	1.57482	92.8905	0.514445	79.9907	0.403299	74.4745	0.917363	80.1234	0.314257	93.337	0.901602	95.4597	0.199988	95.1865	0.734665	97.8439	0.804875	96.9711	1.85569	100.196	1.07587	97.935	0.311226	98.4924	0.102318
9.75	83.044	0.160299	84.0174	0.977507	92.8214	0.0608962	78.6155	0.297641	73.8743	0.711114	80.8036	1.05748	91.1619	1.45303	97.8863	0.547287	96.068	0.121645	99.4426	0.631728	98.605	0.506058	99.9501	1.01643	100.443	0.938045	98.4275	0.368658
10.5	83.5097	0.189411	83.4318	0.484196	92.5536	0.119019	78.2116	0.0773271	73.2389	0.922921	81.7343	0.531212	94.9582	0.863381	97.1712	0.0162563	96.4003	1.32397	99.6947	1.31001	97.4559	2.55752	100.515	0.49514	97.973	1.50765	96.6113	0.725895

## Sheet: Fig 5e
Pilo (1mM )	Gi1		Gi2		Gi3		GoA		GoB		Gz		G15		Ggust		Gq		G11		G12		G13		GsL		GsS
time [min]	mean	SEM	mean	SEM	mean	SEM	mean	SEM	mean	SEM	mean	SEM	mean	SEM	mean	SEM	mean	SEM	mean	SEM	mean	SEM	mean	SEM	mean	SEM	mean	SEM
-3.04688	98.543	0.507936	101.201	1.31031	100.372	0.283626	100.495	0.279762	99.749	0.630387	100.758	0.57972	99.2099	0.581402	99.8904	1.50515	100.497	0.657369	99.5105	0.466076	100.181	0.45897	99.7011	0.343663	99.6327	0.569683	100.226	0.854512
-2.4375	99.5068	1.43716	101.627	1.51115	100.955	0.338413	99.9482	0.373671	99.2923	0.576993	100.158	0.404361	99.5911	0.741778	99.7761	1.01653	100.163	0.556534	100.194	0.695254	98.8631	0.735927	99.515	0.486972	100.8	0.329206	99.9793	0.575759
-1.82813	101.626	0.858823	100.551	1.44779	101.3	0.255055	99.7157	0.0212858	99.9225	0.810295	100.016	0.432258	99.9546	0.254913	99.8895	0.791008	99.8623	0.67625	100.504	0.690359	100.415	0.937826	99.3786	0.437725	99.5265	0.283	99.8139	0.567205
-1.21875	100.324	0.000691	100.405	0.688899	100.64	0.362835	100.064	0.473042	99.2608	0.334181	99.7969	0.433949	100.191	0.647661	99.4707	0.687951	100.069	0.587755	99.582	0.349859	100.029	1.40009	100.999	0.835429	99.7203	0.82897	100.002	0.460003
-0.60938	97.7564	0.112637	101.342	1.3914	101.421	0.417628	99.7763	0.343501	101.775	0.926143	99.2704	1.11164	101.054	0.306236	100.973	1.20567	99.4088	0.472341	100.21	0.880773	100.512	0.75065	100.407	0.577676	100.32	0.541714	99.9786	0.493755
0	92.5259	0.293885	96.1677	2.03675	90.9089	0.496673	89.902	0.242804	90.3613	0.179261	97.663	0.270687	96.1643	1.46897	99.9006	1.386	99.4251	0.723543	100.309	0.602264	102.672	0.565741	99.8064	1.32369	101.267	0.671725	101.042	0.891811
0.75	94.7554	1.02654	96.0884	0.64549	92.7453	0.0219727	90.5387	0.449055	86.5754	0.180355	98.3708	0.387204	95.9365	1.90065	100.721	1.00737	99.2519	0.885392	100.297	0.741149	100.676	0.828076	100.151	0.583021	101.672	0.55054	100.835	1.03264
1.5	92.5442	0.173944	94.3354	0.800679	91.0785	0.746733	89.9678	0.718711	87.4777	0.593973	96.7697	0.228189	96.4191	1.96654	99.8102	1.67355	98.9386	1.18589	99.718	0.475275	102.95	1.0079	99.56	0.537962	101.075	0.623946	99.9459	1.04171
2.25	91.8035	0.793558	94.8626	0.715565	92.2114	0.598693	89.7946	0.589346	86.3956	0.910994	95.9471	0.966334	96.2356	2.4004	99.2996	1.50348	97.3402	0.437681	99.7522	0.285154	99.7802	0.591815	99.3917	1.0434	101.257	0.654299	100.747	0.913664
3	91.8623	0.524998	93.0047	0.350321	91.2273	0.639684	89.3496	0.160094	85.546	0.0691221	98.5564	0.926048	96.2115	2.31627	98.7479	1.44152	98.2039	1.23538	99.7654	0.825718	100.544	1.39795	100.309	0.829895	101.215	0.443317	100.395	0.508118
3.75	92.0757	0.8618	95.3224	1.35511	92.3766	0.122351	89.7339	0.883759	85.5634	0.234921	95.6464	1.45762	95.6574	2.50593	100.691	1.46004	98.7249	1.0536	99.5461	0.30572	100.426	1.56071	99.1117	0.586447	100.52	0.662729	100.025	1.36696
4.5	93.1388	0.580951	95.0829	0.92663	92.0981	0.609125	88.9236	0.55597	84.5614	0.0817796	96.8783	0.828975	95.8595	1.1381	99.6483	1.63226	97.7849	1.12791	99.0384	0.480401	99.5719	1.14538	99.4509	0.283448	101.65	0.48315	100.83	0.90629
5.25	93.1225	0.0816422	94.7651	0.868283	92.1975	0.239995	88.8214	0.49125	83.7555	0.514689	95.985	0.164932	94.0831	2.27964	99.9386	1.54036	97.9361	1.34131	100.399	0.582555	101.22	1.38784	99.0272	0.745028	100.394	0.548312	101.019	1.32933
6	92.4418	0.443236	92.8774	1.08622	91.9423	0.273314	89.2943	0.694054	82.3564	0.0117666	93.5186	0.314012	95.9229	1.6077	100.49	1.40756	98.6085	0.747072	99.8283	0.753165	101.352	0.991473	100.208	0.903734	102.564	1.00231	100.855	1.22078
6.75	92.0974	0.497896	94.6021	1.09969	91.8663	0.309314	88.528	0.948635	83.818	0.408899	95.8355	0.0846517	94.9513	2.15854	98.3484	1.12557	98.5269	1.34015	98.4903	0.768968	100.74	0.942405	98.8893	1.08659	100.547	0.637486	100.654	0.958652
7.5	93.1474	0.807907	95.2962	0.515004	92.6172	0.725472	89.6493	0.78699	82.0268	1.09468	95.9158	0.320064	96.0425	2.06677	99.9191	1.80572	99.3452	0.984679	99.1869	0.753604	99.7799	2.11944	99.4202	0.55049	101.208	0.387667	100.827	1.01815
8.25	92.7863	0.0322383	94.1394	1.27863	92.483	0.36822	89.8013	0.0628415	83.7386	0.11323	95.6491	0.270768	95.6928	0.545757	100.477	2.35221	98.9524	1.12099	99.4595	0.490218	100.247	0.903514	99.3297	1.27575	101.139	0.838843	101.491	1.34063
9	92.5819	0.0074511	94.3891	1.39891	92.5717	0.198693	89.3054	0.92055	82.618	0.510645	97.6061	0.370419	95.2597	2.45525	100.523	1.54356	98.1706	1.65703	99.2504	0.391674	100.231	1.10424	99.7363	0.360007	100.421	0.846774	100.458	1.21592
9.75	92.6731	0.0729313	93.8652	0.520759	92.613	0.548119	89.7325	0.18993	82.8011	0.200027	94.9408	0.359003	96.3477	1.04059	98.9782	2.21835	99.5428	1.18961	100.967	0.653601	101.6	1.74022	99.3748	0.851395	100.586	0.65883	102.583	0.744144
10.5	91.4436	0.623431	93.5856	1.63182	93.087	0.888531	89.3774	0.520482	81.2427	0.257367	93.9651	0.597645	93.8943	2.27336	100.04	1.35556	97.2836	1.24893	100.523	0.421079	101.026	1.16968	99.613	0.476133	102.431	0.446735	102.916	0.817573

## Sheet: Fig 5f
	ACh			Ixo			Arec			Pilo
	Mean	SEM	N	Mean	SEM	N	Mean	SEM	N	Mean	SEM	N
Gi1	1	0.007765	36	1.075	0.02357	25	0.937	0.0156	21	0.364	0.04115	23
Gi2	1	0.01314	30	1.087	0.05772	19	1.01	0.05617	15	0.5135	0.04459	17
Gi3	1	0.0196	36	1.145	0.0436	23	0.6492	0.04381	19	0.1796	0.03472	23
GoA	1	0.01115	31	1.072	0.0218	17	1.088	0.02844	13	0.794	0.0258	17
GoB	1	0.006135	34	1.069	0.04416	25	1.081	0.01502	16	0.8184	0.01989	15
Gz	1	0.01297	36	1.181	0.04247	21	0.7574	0.03151	26	0.1426	0.02947	23
G15	1	0.03453	28	1.489	0.1941	20	0.8864	0.09729	18	0.4357	0.1053	19
