# Supplementary material for: Ligand-specific activation trajectories dictate GPCR signalling in cells
Source: Nature. 2026 Jan 14;650(8103):1053–62. doi: 10.1038/s41586-025-09963-3 (PMC12935549; doi:10.1038/s41586-025-09963-3)
Supplement: Supplementary file 12 — Source Data Extended Data Fig. 1 [file 41586_2025_9963_MOESM12_ESM.xlsx]

## Sheet: Ext Data Fig 1
c)	T84			d)	E175			e)	F181			f)	F188			g)	A414			h)	P415			i)	N419
	N EGFP	N Cy3			N EGFP	N Tet-Cy3			N EGFP	N Tet-Cy3			N EGFP	N Tet-Cy3			N EGFP	N Tet-Cy3			N EGFP	N Tet-Cy3			N EGFP	N Tet-Cy3
	2.01313	1.33861			0.296094	0.437037			3.15591	2.96697			0.907314	1.40452			0.588622	1.93119			2.25629	0.959945			10.0973	4.66058
	3.55514	3.55514			1.3293	1.88341			0.821563	2.76674			2.23346	3.16185			0.366189	0.935671			2.06122	1.13187			2.08518	2.92729
	2.92032	1.04765			1.26946	2.86793			1.71751	1.788			1.39843	2.84682			0.392057	0.857927			1.40096	1.65559			4.07585	5.8557
	2.81186	2.21816			0.701031	2.17021			2.16816	2.44726			1.24945	2.18672			0.57695	0.987275			2.58929	1.01968			13.6857	9.2084
	4.40113	5.05896			0.738636	0.975			1.51055	2.46996			4.38905	2.98605			0.507819	1.03704			1.18227	1.01767			10.7662	8.38462
	5.81806	5.01639			0.503597	0.705314			3.96899	3.57642			3.67752	1.79899			1.15846	1.73847			2.35294	1.19742			13.1424	10.3701
	3.44355	0.869695			1.52601	0.913495			3.27947	1.67699			3.30752	1.48803			0.910314	1.76612			0.670051	1.27485			9.63286	9.34522
	2.68898	0.92448			1.1981	3.36322			5.02848	3.25902			2.22548	1.86715			4.5626	4.6233			1.32394	0.862676			10.6242	7.4327
	2.25557	2.43229			1.29447	4.92518			5.81107	3.21089			3.89625	2.23716			1.74059	1.7896			2.9697	1.80989			4.85049	7.36662
	3.52526	4.81816			2.60747	4.01623			0.442911	1.01543			8.01153	5.54695			3.55099	3.38779			1.95718	2.03167			8.52269	6.81803
	1.16316	1.38045			4.70376	11.3978			2.24552	1.68714			4.14631	4.34206			2.91586	3.04088			1.20431	1.78278			12.5723	8.22183
	1.35404	2.2447			6.75468	12.371			3.86816	3.34408			2.46285	2.44643			1.36831	1.19745			10.1797	16.5349			29.0378	12.4791
	2.75002	3.04647			2.6588	3.37619			2.97328	3.64586			4.70047	3.70325			2.11708	1.3854			7.73336	11.1571			9.21009	4.66735
	9.84862	14.0741			2.22393	5.19656							1.49099	2.39893			3.8901	5.38657			17.2953	15.9101			6.84494	11.0424
	1.01337	1.31446			9.76196	18.7016							2.81188	1.03694			3.36933	3.01765			16.4455	22.53
	3.28143	4.65729			8.49057	16.2312							2.96847	1.12896			2.55574	2.91489			1.12524	1.41983
	2.99434	2.75943			18.4297	31.111							1.14144	0.444448			2.44504	1.89279			3.31273	1.1608
	6.32714	2.0252			33.0854	40.5691							1.68524	0.819042			1.39698	1.89032			1.61866	1.42988
	1.5939	2.56348			9.38927	22.6799							4.14904	1.51059			0.845671	1.44378			7.18073	1.86074
	1.46337	2.40335			11.8964	21.2921							2.03193	0.680472			1.0253	2.02823			3.27068	2.79172
	2.70241	6.61089			0.912756	2.1333											1.30412	1.93525			4.94372	4.93792
					2.83028	1.55045											2.62428	2.72298			8.33513	4.86623
					0.717487	0.772617															5.95883	2.99794
					0.767554	1.26337															8.62377	10.1066
					2.16798	2.47611															5.88818	5.02925
					1.03937	1.93209															10.3211	10.7193
					3.62344	1.36052															8.51499	3.40022
					1.83383	2.99611															6.02262	4.87675
					12.0759	16.8773															4.58391	2.42461
					1.75226	3.0404															5.83798	4.11001
					1.34023	1.78097
					2.14609	0.531285
					0.794618	0.626794
					6.41279	2.32985
					7.9439	3.99477
					4.45975	2.15659
					1.21617	1.44901
					2.81361	0.63005
					2.90636	1.08894
					3.90721	1.37727
					6.97168	1.42906
					0.718066	1.41105
					2.65848	2.32011
					3.19667	1.01634
					6.74831	1.82061
					5.83548	1.35328
					4.9918	2.02265
					2.98397	1.32937
					1.50188	0.792968
					0.915083	1.46944
					2.10991	3.62723
					1.44888	1.99035
					2.17057	5.61899
					1.70737	2.03191
					1.87069	3.21669
					2.45243	4.44967
					1.90846	2.11386
					1.43606	1.96004
					1.57923	1.97107
					1.32611	2.70264
					1.65421	5.98357
					1.50299	1.94672
