# Supplementary material for: Ligand-specific activation trajectories dictate GPCR signalling in cells
Source: Nature. 2026 Jan 14;650(8103):1053–62. doi: 10.1038/s41586-025-09963-3 (PMC12935549; doi:10.1038/s41586-025-09963-3)
Supplement: Supplementary file 13 — Source Data Extended Data Fig. 2 [file 41586_2025_9963_MOESM13_ESM.xlsx]

## Sheet: Ext Data Fig 2a
	Time (s)	wt		Time (s)	T84		Time (s)	E175		Time (s)	F181		Time (s)	F188		Time (s)	A414		Time (s)	P415		Time (s)	N419
	0	-0.180256		0	-0.0232119		0	-0.522159		0	0.979436		0	0.565979		0	0.924814		0	-2.29183		0	4.2458
	0.05	-0.347196		0.1	-0.108769		0.1	0.00103485		0.1	0.699527		0.057	-0.952251		0.1	-0.497059		0.106	-2.02555		0.1	3.90711
	0.1	-0.115518		0.2	-1.32407		0.2	0.0497088		0.201	-0.0418982		0.117	-0.745585		0.2	-0.148727		0.2	-1.50971		0.201	3.08888
	0.15	0.373031		0.3	0.389789		0.3	-0.317004		0.301	0.32706		0.174	0.0970644		0.3	0.118656		0.326	-1.78755		0.305	2.43806
	0.2	0.499288		0.4	0.29261		0.4	0.325324		0.4	0.118408		0.232	1.28121		0.4	-0.910872		0.401	-0.0851639		0.4	2.23618
	0.25	1.00487		0.5	1.1517		0.5	-0.218064		0.5	-0.627818		0.29	0.870026		0.5	-0.005754		0.5	-0.256092		0.505	1.82022
	0.3	0.831229		0.6	-0.493741		0.6	-0.0029051		0.601	-0.728309		0.348	1.2849		0.6	0.258937		0.601	-0.739952		0.612	1.57638
	0.35	0.642264		0.7	0.480133		0.7	-0.250175		0.701	-0.53736		0.406	0.94007		0.7	-0.365821		0.699	0.530889		0.705	1.86125
	0.4	0.534767		0.8	0.168428		0.8	-0.216789		0.8	-0.731803		0.468	0.920198		0.8	0.403748		0.8	1.51745		0.8	1.76158
	0.45	0.806847		0.9	-0.439714		0.9	0.322718		0.9	1.1575		0.531	1.91387		0.9	-0.432338		0.901	0.928056		0.906	3.3451
	0.5	1.61595		1	0.24859		1	0.826559		1.001	1.87374		0.59	1.72862		1	0.446685		1	0.209866		1.002	3.31486
	0.55	1.65925		1.1	0.31778		1.1	-0.0192791		1.1	1.61162		0.648	0.363073		1.1	0.30938		1.099	-0.595007		1.103	2.86442
	0.6	2.63241		1.2	-0.462523		1.2	-0.021843		1.2	0.717197		0.724	1.41111		1.2	0.239754		1.199	-1.99621		1.2	1.83685
	0.65	3.44422		1.3	0.344018		1.3	0.380197		1.301	0.837358		0.824	0.537628		1.3	0.210225		1.3	-1.31746		1.305	0.435264
	0.7	2.62088		1.4	0.557928		1.4	0.591865		1.401	0.271685		0.923	-0.906927		1.4	0.104819		1.4	0.565386		1.4	-0.584972
	0.75	1.89025		1.5	0.432215		1.5	-0.480831		1.5	0.58252		1.025	0.944009		1.5	-0.878299		1.503	0.576771		1.514	-1.30932
	0.8	1.42445		1.6	-0.846578		1.6	-0.448618		1.601	0.187823		1.128	0.960535		1.6	0.224095		1.606	-0.192825		1.6	-0.689834
	0.85	0.911481		1.7	-1.27824		1.7	0.728259		1.701	-0.254735		1.223	0.186834		1.7	0.538128		1.7	-0.693238		1.705	-0.211593
	0.9	0.204519		1.8	-0.415521		1.8	0.133952		1.801	-0.719184		1.323	1.68349		1.8	-0.159994		1.821	-1.78879		1.8	0.570745
	0.95	-0.344832		1.9	0.232651		1.9	0.344795		1.919	-1.4625		1.428	1.63897		1.9	-0.046112		1.9	-2.89395		1.905	-0.328304
	1	0.811355		2	-0.670871		2	0.373583		2.001	-1.51972		1.524	0.0112358		2	-0.106885		2	-2.49176		2.001	-0.382931
	1.05	0.523076		2.1	0.0511954		2.1	-0.444132		2.101	-2.02225		1.624	0.0338535		2.1	-0.807694		2.1	-2.22943		2.105	0.0437747
	1.1	-0.547339		2.2	-0.77735		2.2	0.351819		2.202	-3.32457		1.725	-0.0623211		2.2	-0.0674799		2.201	-0.54816		2.199	0.470639
	1.15	0.132636		2.3	-0.643646		2.3	0.688465		2.301	-2.53118		1.824	-0.403864		2.3	0.043909		2.302	1.26301		2.304	0.368748
	1.2	1.53209		2.4	-0.406244		2.4	-0.751647		2.401	-2.0342		1.923	0.739404		2.4	0.416967		2.4	0.272594		2.4	-0.0840209
	1.25	2.48856		2.5	-0.0819909		2.5	-0.435244		2.5	-2.29853		2.023	1.8761		2.5	-0.301716		2.5	-2.72929		2.506	-1.35542
	1.3	1.73821		2.6	-0.351414		2.6	-0.322852		2.6	-1.49079		2.124	1.0406		2.6	0.42353		2.599	-3.09492		2.6	-0.620545
	1.35	2.04565		2.7	1.23311		2.7	-0.574309		2.701	-1.87014		2.225	0.763848		2.7	-0.725134		2.7	-3.67114		2.705	-1.2419
	1.4	1.78231		2.8	0.624714		2.8	0.700556		2.8	-2.49458		2.324	-0.565797		2.8	-0.581214		2.799	-2.86248		2.8	1.75278
	1.45	0.716437		2.9	-0.643492		2.9	-0.170542		2.901	-1.70331		2.424	-1.93672		2.9	-1.5774		2.924	-0.177622		2.905	2.53208
	1.5	0.100574		3	-0.311645		3	-0.658687		3	-0.372323		2.524	-0.787312		3	0.192099		3.001	-0.136905		2.999	2.5713
	1.55	0.309742		3.1	0.0656708		3.1	-0.167785		3.101	0.191223		2.624	-1.0597		3.1	-0.443505		3.113	0.625883		3.105	2.18447
	1.6	0.420219		3.2	-0.709941		3.2	0.180755		3.2	0.652861		2.73	-0.817822		3.2	0.788659		3.2	1.64338		3.2	-0.676545
	1.65	-0.780146		3.3	0.672335		3.3	-0.620775		3.3	-0.394603		2.824	0.366769		3.3	-0.393678		3.3	1.40393		3.305	-1.84683
	1.7	-2.11504		3.4	-0.257844		3.4	0.144842		3.401	-1.81623		2.925	-1.40317		3.4	0.773742		3.399	1.70759		3.401	-3.45322
	1.75	-2.15194		3.5	0.149473		3.5	-0.394985		3.501	-2.27733		3.024	-1.104		3.5	0.260376		3.499	2.23031		3.505	-2.77125
	1.8	-2.0608		3.6	0.0275415		3.6	-0.0545873		3.601	-0.0835173		3.125	-0.88791		3.6	1.18959		3.6	1.29974		3.6	-0.55093
	1.85	-2.22741		3.7	0.655816		3.7	0.340313		3.701	3.12325		3.224	-1.13591		3.7	0.637728		3.699	2.03183		3.702	0.190838
	1.9	-1.202		3.8	-0.444083		3.8	-0.375994		3.8	3.33434		3.325	-0.511743		3.8	-0.384211		3.8	0.327363		3.801	1.85582
	1.95	-0.402835		3.9	1.49553		3.9	0.519588		3.9	1.9131		3.424	1.35922		3.9	-0.499292		3.9	1.66325		3.905	3.13316
	2	-0.635945		4	0.0175828		4	0.19975		4.001	0.164759		3.527	1.21711		4	0.453672		4	2.16793		4	1.48076
	2.05	-0.328075		4.1	-0.338834		4.1	-0.510642		4.113	-1.43521		3.624	0.790579		4.1	0.0475349		4.1	1.61533		4.105	1.33727
	2.1	-0.43373		4.2	-0.312841		4.2	0.0747029		4.2	-1.56014		3.724	0.541037		4.2	0.378821		4.206	-0.64357		4.2	-0.990848
	2.15	-0.552042		4.3	0.487874		4.3	0.43164		4.302	0.0245959		3.826	0.538609		4.3	0.951336		4.302	-0.981883		4.303	-1.94717
	2.2	-0.198366		4.4	-0.255117		4.4	-0.312696		4.402	-1.22237		3.924	0.935541		4.4	-0.495803		4.428	-2.46202		4.408	-2.4923
	2.25	-1.04325		4.5	0.124155		4.5	-0.125646		4.512	-1.6028		4.026	2.2487		4.5	-0.0646318		4.5	1.28644		4.504	-1.59705
	2.3	-0.0829126		4.6	0.319466		4.6	0.31691		4.6	-1.19793		4.126	1.48194		4.6	0.671279		4.6	1.31643		4.606	-0.0626747
	2.35	0.152833		4.7	0.798216		4.7	0.424794		4.7	-0.740823		4.225	1.19826		4.7	0.764579		4.7	2.09804		4.704	1.95612
	2.4	-0.710049		4.8	-0.0718289		4.8	-0.704654		4.801	-1.20462		4.325	0.473837		4.8	-0.378116		4.8	1.17528		4.8	2.61435
	2.45	-0.555395		4.9	1.21943		4.9	-0.295296		4.9	-0.211319		4.426	-0.767097		4.9	0.298735		4.9	0.412916		4.905	3.26574
	2.5	-1.49004		5	-0.888444		5	-0.0643754		5.001	-0.128209		4.525	-0.957106		5	0.462151		5	-0.466984		5	2.5016
	2.55	-1.60753		5.1	0.310474		5.1	0.626725		5.103	-0.839933		4.625	-0.768584		5.1	0.219095		5.1	-0.312114		5.104	1.49295
	2.6	-1.03363		5.2	-0.165759		5.2	-0.170727		5.2	-1.51599		4.728	-0.213652		5.2	0.307635		5.199	-1.24739		5.2	-0.672137
	2.65	-1.47309		5.3	-1.50974		5.3	0.0704243		5.791	-1.28609		4.828	1.48137		5.3	-1.1647		5.299	-0.149802		5.305	-0.339116
	2.7	0.245983		5.4	-0.353711		5.4	0.673045		5.834	-1.09359		4.925	1.4498		5.4	0.25268		5.407	0.467237		5.403	-0.794998
	2.75	0.817674		5.5	-0.151975		5.5	0.539647		5.873	0.653318		5.027	2.52624		5.5	0.0774833		5.499	2.72494		5.505	0.179534
	2.8	1.5257		5.6	1.03414		5.6	-0.0900203		5.912	1.13317		5.125	1.67514		5.6	-0.666526		5.629	3.1878		5.601	0.344989
	2.85	2.46538		5.7	1.34447		5.7	0.414184		5.953	0.0932032		5.224	2.4799		5.7	0.134906		5.699	2.33165		5.705	0.957597
	2.9	2.27352		5.8	-1.14278		5.8	-0.902493		5.992	-1.50408		5.325	1.80896		5.8	0.745904		5.799	2.5489		5.8	2.3756
	2.95	2.13354		5.9	-0.604797		5.9	0.00172938		6.034	-1.98604		5.425	0.545474		5.9	-1.55028		5.9	0.948445		5.905	2.53221
	3	1.65619		6	-0.145538		6	-0.275748		6.073	-1.28071		5.525	0.559058		6	0.438253		6	0.0815719		6.003	1.49344
	3.05	-0.115063		6.1	-0.687983		6.1	0.0996437		6.112	-0.912951		5.627	0.53899		6.1	0.996042		6.099	0.792074		6.105	1.09986
	3.1	-0.0786572		6.2	0.335321		6.2	-0.581961		6.182	-1.42195		5.725	0.133442		6.2	0.129902		6.199	0.520241		6.202	0.599559
	3.15	-0.566039		6.3	0.983445		6.3	0.112167		6.281	-1.0857		5.825	1.19172		6.3	-0.218556		6.3	1.38043		6.307	0.122944
	3.2	-0.335853		6.4	-0.678027		6.4	-0.645894		6.382	-1.95795		5.926	-1.17452		6.4	0.368734		6.399	0.449641		6.4	-0.435903
	3.25	0.447096		6.5	0.374251		6.5	0.0154889		6.482	-2.3754		6.024	-2.05019		6.5	1.30716		6.506	-2.19758		6.506	-0.36503
	3.3	-0.382288		6.6	0.96305		6.6	0.28815		6.582	-1.80405		6.125	-1.47883		6.6	-0.481855		6.6	-2.93837		6.6	-0.128571
	3.35	-0.218279		6.7	-0.284176		6.7	-0.277157		6.682	-1.0633		6.225	-2.2293		6.7	0.0206124		6.717	-3.16878		6.704	0.575473
	3.4	-0.685293		6.8	-0.793902		6.8	0.167759		6.788	-1.40522		6.327	-1.8977		6.8	0.387001		6.8	-1.56989		6.8	0.882126
	3.45	-1.77344		6.9	-0.0498664		6.9	-0.165913		6.888	-0.757511		6.426	-1.1935		6.9	1.50983		6.899	0.134597		6.904	-1.13966
	3.5	-1.29357		7	0.164506		7	-0.0523756		6.982	-0.67457		6.532	-1.89086		7	-0.0802727		7	1.85139		7.001	0.101423
	3.55	-1.12293		7.1	0.0158952		7.1	0.0505098		7.083	-1.68032		6.628	-1.18265		7.1	0.613196		7.099	2.19442		7.106	-1.09599
	3.6	-0.794778		7.2	-0.311014		7.2	-0.343996		7.182	-2.12518		6.725	-0.904724		7.2	-0.756961		7.199	1.5001		7.2	-1.05579
	3.65	-0.616712		7.3	-1.16206		7.3	0.42452		7.285	-1.78099		6.825	-1.24733		7.3	-0.39251		7.299	0.236165		7.305	-0.0110165
	3.7	-0.740734		7.4	0.695994		7.4	0.464118		7.381	-1.86931		6.925	-0.78275		7.4	-1.48725		7.399	0.0808496		7.4	0.670589
	3.75	-0.442071		7.5	-0.63429		7.5	-0.134808		7.481	-1.30752		7.027	0.135462		7.5	0.035702		7.52	-1.40543		7.504	2.00508
	3.8	-0.447294		7.6	-0.362178		7.6	-0.364279		7.581	-1.00208		7.125	-0.710396		7.6	0.0404134		7.6	0.637095		7.6	3.00737
	3.85	-0.406147		7.7	-1.47134		7.7	-0.458609		7.682	-1.16338		7.225	-1.06351		7.7	-0.445037		7.702	2.09333		7.703	2.59308
	3.9	0.223226		7.8	0.41734		7.8	-0.623273		7.781	-0.70221		7.325	-1.97412		7.8	-0.188013		7.8	2.3831		7.803	3.25129
	3.95	0.392643		7.9	-0.516397		7.9	0.311766		7.882	-0.632496		7.425	-2.14214		7.9	0.300391		7.899	1.9647		7.917	1.66813
	4	1.01492		8	-0.622968		8	0.602212		7.981	-0.699332		7.526	-0.224733		8	-0.740906		8	0.97071		8.016	2.4904
	4.05	1.77227		8.1	0.249788		8.1	-0.434375		8.081	-0.354702		7.628	1.20418		8.1	-0.140479		8.1	-1.23197		8.116	3.29715
	4.1	1.91396		8.2	0.150887		8.2	0.0512833		8.182	-0.147934		7.725	1.89067		8.2	-0.286507		8.2	-1.21598		8.229	2.22724
	4.15	1.71298		8.3	-1.18227		8.3	0.159625		8.281	0.9671		7.826	1.1671		8.3	0.190952		8.3	-1.58369		8.309	1.05203
	4.2	1.25969		8.4	0.14912		8.4	-0.697469		8.381	1.13242		7.926	-0.18338		8.4	-0.679315		8.403	-0.45285		8.43	1.61071
	4.25	0.723743		8.5	-0.140594		8.5	0.497846		8.481	0.274023		8.025	-1.22085		8.5	-1.52848		8.506	0.0219812		8.51	0.957092
	4.3	0.755147		8.6	-0.385146		8.6	0.111465		8.581	-0.593745		8.127	-0.525795		8.6	0.759022		8.6	-0.761307		8.604	0.0592357
	4.35	0.353542		8.7	-0.921724		8.7	-0.192619		8.681	-1.00038		8.226	-0.580754		8.7	-0.899577		8.71	-1.00023		8.708	-0.336639
	4.4	1.35492		8.8	0.561686		8.8	0.0230614		8.781	-1.00785		8.326	-1.05426		8.8	0.911512		8.799	-0.701067		8.806	0.883297
	4.45	1.37233		8.9	-0.117885		8.9	0.23795		8.882	-1.22492		8.426	-1.50558		8.9	-0.57586		8.899	-0.465592		8.905	1.0242
	4.5	1.62896		9	0.822225		9	-0.461141		8.981	-2.32499		8.523	-0.517063		9	0.213467		9	-0.866464		9.001	0.744543
	4.55	1.3907		9.1	0.883194		9.1	-0.187216		9.082	-2.4754		8.623	0.560385		9.1	-0.561421		9.1	-0.379514		9.106	0.645608
	4.6	0.439916		9.2	-0.307581		9.2	0.334384		9.181	-2.08031		8.723	1.88175		9.2	1.2606		9.2	0.0142619		9.2	1.93691
	4.65	-0.342437		9.3	0.379282		9.3	-0.291244		9.281	-0.936022		8.823	1.57379		9.3	-0.605994		9.3	0.115312		9.307	1.00335
	4.7	-0.464922		9.4	0.193821		9.4	0.102764		9.382	-0.310724		8.924	0.489695		9.4	-0.244427		9.406	1.79201		9.409	0.516569
	4.75	-0.782673		9.5	0.528943		9.5	-0.0269241		9.481	-0.278091		9.024	-0.331151		9.5	-0.0050907		9.499	1.94374		9.506	-0.101002
	4.8	-1.00019		9.6	0.959104		9.6	-0.231798		9.589	-1.03812		9.123	0.493615		9.6	0.72404		9.614	0.360839		9.608	0.11508
	4.85	-1.64489		9.7	0.639353		9.7	0.561684		9.695	-1.46728		9.224	0.714839		9.7	-1.06228		9.699	0.50206		9.704	0.402687
	4.9	-1.03982		9.8	-1.27005		9.8	0.23423		9.781	-0.967757		9.324	1.96035		9.8	-0.248633		9.799	0.270819		9.801	0.706509
	4.95	-0.548296		9.9	0.43462		9.9	0.677734		9.881	0.864828		9.424	1.00731		9.9	-0.835632		9.899	-1.45743		9.905	0.839071
	5	-0.7604		10	-0.451359		10	0.786309		9.981	2.02807		9.523	1.53322		10	1.36449		10.001	-1.03399		10.002	0.182414
	5.05	-0.478704		10.1	0.954815		10.1	-0.175161		10.081	2.84105		9.623	0.239809		10.1	1.08526		10.1	-1.44743		10.106	-0.9867
	5.1	-0.348373		10.2	0.58843		10.2	-0.128035		10.181	2.24097		9.724	0.868041		10.2	1.00114		10.201	-0.531006		10.201	-0.5309
	5.15	-0.415039		10.3	-0.211036		10.3	0.0684673		10.281	1.57225		9.823	1.01081		10.3	-0.555416		10.306	0.228298		10.3	-0.566844
	5.2	-1.06844		10.4	-0.837233		10.4	-0.189764		10.381	0.929098		9.923	1.57452		10.4	0.811403		10.4	0.742623		10.405	0.106935
	5.25	-1.47612		10.5	0.106261		10.5	0.372641		10.481	-0.261477		10.025	0.137653		10.5	-0.419518		10.532	0.688174		10.5	0.442516
	5.3	-2.03055		10.6	-0.441234		10.6	-0.432923		10.582	-1.83707		10.123	-0.190748		10.6	-0.500047		10.599	0.971752		10.605	-0.0330605
	5.35	-1.47937		10.7	-0.528634		10.7	1.05335		10.681	-2.06626		10.223	-1.678		10.7	-0.582777		10.699	0.695365		10.701	-0.568673
	5.4	-1.07644		10.8	-1.07906		10.8	0.084813		10.781	-1.39815		10.324	-0.131145		10.8	0.590596		10.8	1.14153		10.806	-1.34918
	5.45	-0.343546		10.9	1.25053		10.9	-0.445825		10.887	-0.983205		10.423	0.309095		10.9	0.250368		10.899	-0.820279		10.9	-2.3744
	5.5	-0.481722		11	-1.14842		11	0.11643		10.982	-0.479773		10.523	0.462466		11	0.799437		11	-0.642076		11.018	-2.71078
	5.55	0.256528		11.1	-0.490065		11.1	0.313181		11.081	-0.667744		10.624	0.490363		11.1	-0.849277		11.105	0.135083		11.1	-1.97396
	5.6	0.117889		11.2	-0.0218078		11.2	0.35589		11.181	-1.00458		10.723	0.868805		11.2	-0.123787		11.211	-0.0548663		11.206	-1.72179
	5.65	-0.454477		11.3	0.810328		11.3	-0.188585		11.283	-0.24226		10.824	-0.831954		11.3	1.50149		11.3	0.0418681		11.301	-1.66153
	5.7	-0.798467		11.4	-1.60759		11.4	0.258954		11.381	0.627922		10.923	0.360102		11.4	1.07342		11.399	0.046424		11.41	-1.41678
	5.75	-0.373885		11.5	0.913359		11.5	0.555495		11.481	0.212907		11.024	0.588264		11.5	-0.754219		11.499	-2.25142		11.5	-1.22356
	5.8	0.265144		11.6	-0.217132		11.6	0.491548		11.581	0.28815		11.124	-0.516679		11.6	0.689182		11.599	-1.23443		11.608	-2.56524
	5.85	1.24334		11.7	-1.2453		11.7	-0.268451		11.681	-0.221341		11.224	-0.442298		11.7	0.0888751		11.7	-1.65777		11.71	-4.42369
	5.9	1.41625		11.8	1.24821		11.8	0.184474		11.782	-0.741188		11.324	-0.0726908		11.8	0.805396		11.806	-1.16917		11.806	-5.0105
	5.95	2.17277		11.9	0.122617		11.9	0.26043		11.881	-0.949246		11.424	-1.04094		11.9	-0.157934		11.899	0.935486		11.902	-5.33789
	6	1.42217		12	-0.729561		12	-0.601006		11.981	-0.846548		11.525	0.113475		12	0.192419		12.03	1.63935		12.001	-5.01026
	6.05	1.05362		12.1	-0.797815		12.1	-1.17725		12.087	-0.87133		11.627	0.600344		12.1	-0.237677		12.099	0.496502		12.1	-4.44274
	6.1	0.882889		12.2	0.0294517		12.2	-0.70663		12.194	-0.977155		11.724	1.08196		12.2	-0.896798		12.2	1.2715		12.207	-3.85595
	6.15	0.474783		12.3	-0.171752		12.3	-0.596376		12.281	-1.62307		11.824	2.09768		12.3	0.142991		12.3	0.163419		12.3	-3.24492
	6.2	-0.55698		12.4	0.00540223		12.4	-0.671919		12.382	-2.40507		11.924	2.02189		12.4	0.881576		12.399	0.485173		12.406	-3.82688
	6.25	-0.3219		12.5	-0.483021		12.5	-0.865834		12.481	-1.23676		12.028	1.19692		12.5	-0.0738989		12.5	0.90253		12.502	-3.91757
	6.3	-0.829779		12.6	-0.58735		12.6	-1.24308		12.581	0.670707		12.124	-0.615325		12.6	0.970305		12.599	0.619106		12.606	-2.40759
	6.35	-1.15231		12.7	-0.277936		12.7	-1.38881		12.682	1.79706		12.224	-3.19862		12.7	-1.09349		12.7	-0.115403		12.706	-2.78833
	6.4	-1.62735		12.8	-0.708691		12.8	-1.53363		12.782	1.07204		12.325	-2.9371		12.8	0.551344		12.799	0.150492		12.806	-2.4687
	6.45	-1.14683		12.9	-0.418168		12.9	-1.65361		12.881	0.305558		12.426	-2.61356		12.9	0.198402		12.899	-1.38613		12.901	-3.27267
	6.5	-1.02378		13	0.49057		13	-1.92972		12.981	-1.78906		12.527	-1.09383		13	-1.18139		12.999	-1.413		13.009	-4.92207
	6.55	-1.44809		13.1	0.789028		13.1	-1.85119		13.097	-1.52789		12.628	0.439145		13.1	0.528089		13.113	-1.88125		13.109	-5.9268
	6.6	-2.12134		13.2	1.15583		13.2	-1.4638		13.182	-0.547534		12.726	0.416714		13.2	-0.465256		13.2	-2.31779		13.205	-7.67781
	6.65	-1.75302		13.3	0.150018		13.3	-2.41005		13.281	-0.338592		12.825	-0.072248		13.3	-0.0711012		13.301	-1.69117		13.3	-7.73593
	6.7	-1.8502		13.4	0.0394412		13.4	-0.982734		13.382	-1.21571		12.928	-0.450086		13.4	-1.14034		13.399	-0.603057		13.401	-7.89253
	6.75	-2.6297		13.5	-0.0781334		13.5	-1.63219		13.481	-1.23862		13.025	-1.53819		13.5	-0.926478		13.5	-0.14921		13.504	-7.87472
	6.8	-2.24318		13.6	-0.773962		13.6	-2.54374		13.582	-1.07725		13.126	-0.831602		13.6	-0.343305		13.599	0.983478		13.609	-6.54669
	6.85	-1.23666		13.7	0.592352		13.7	-1.85954		13.681	-0.90608		13.225	0.00029079		13.7	-0.532973		13.7	1.53876		13.702	-5.59718
	6.9	-0.99815		13.8	-0.175048		13.8	-2.49336		13.782	0.619727		13.326	0.56467		13.8	0.608862		13.831	-0.816164		13.804	-6.56168
	6.95	-0.415219		13.9	0.484069		13.9	-2.33935		13.881	-0.0230713		13.429	0.762414		13.9	0.439555		13.899	-1.56978		13.901	-6.26825
	7	0.173502		14	-0.572517		14	-2.09804		13.981	-0.30327		13.525	0.0516951		14	-1.07434		14	-2.3308		14.008	-5.30866
	7.05	0.56253		14.1	-0.798679		14.1	-1.98231		14.099	-1.0349		13.626	0.590012		14.1	-0.065572		14.1	-1.62188		14.1	-4.15366
	7.1	0.95245		14.2	-1.37327		14.2	-3.42333		14.181	-1.64629		13.728	1.63146		14.2	-1.13957		14.2	-0.634757		14.209	-5.76844
	7.15	0.12955		14.3	-0.758293		14.3	-2.80764		14.281	-2.54013		13.824	0.923604		14.3	-0.0066205		14.306	1.16401		14.312	-5.23166
	7.2	0.748043		14.4	-0.850359		14.4	-2.6571		14.381	-2.95235		13.926	1.53646		14.4	-0.653398		14.4	1.5223		14.407	-4.70251
	7.25	0.644623		14.5	-0.0765372		14.5	-2.52454		14.481	-4.83277		14.029	1.13163		14.5	0.14557		14.522	0.688709		14.506	-5.85871
	7.3	0.229999		14.6	-0.999964		14.6	-2.61232		14.582	-2.72571		14.126	-0.55191		14.6	0.0630119		14.6	-0.0769946		14.605	-7.54417
	7.35	0.868371		14.7	-0.0439882		14.7	-3.73469		14.681	-2.71646		14.225	-0.431576		14.7	0.285503		14.699	-1.24617		14.7	-8.71213
	7.4	1.0656		14.8	0.114181		14.8	-2.85026		14.781	-2.37518		14.325	0.672048		14.8	0.243777		14.8	-2.7759		14.805	-9.05775
	7.45	0.134724		14.9	0.33537		14.9	-3.31123		14.882	-2.84748		14.429	-0.344558		14.9	0.820438		14.905	-3.23		14.903	-9.67511
	7.5	0.82043		15	-0.147742		15	-2.63847		14.985	-2.94177		14.528	-0.146914		15	-0.712814		15	-1.68846		15.005	-9.39654
	7.55	-0.497105		15.1	0.0292939		15.1	-3.06176		15.086	-2.71469		14.625	-0.453409		15.1	0.0752528		15.119	-1.68788		15.104	-8.60639
	7.6	-1.20795		15.2	-0.576761		15.2	-2.96773		15.181	-0.973145		14.725	-1.84466		15.2	0.813234		15.199	0.177765		15.205	-7.82214
	7.65	-1.75578		15.3	0.276601		15.3	-3.32774		15.281	-1.27342		14.826	-2.01519		15.3	-0.375279		15.3	1.22692		15.301	-7.60852
	7.7	-1.51712		15.4	0.165431		15.4	-2.89601		15.382	-0.803236		14.926	-1.20913		15.4	0.0932041		15.405	0.941413		15.405	-7.26
	7.75	-0.766707		15.5	0.301092		15.5	-2.61316		15.482	-2.5264		15.026	-0.398358		15.5	-1.192		15.5	-1.27678		15.5	-8.67023
	7.8	-0.293791		15.6	-0.513566		15.6	-4.08925		15.581	-2.37602		15.126	0.649463		15.6	-0.573		15.631	-1.99852		15.605	-8.44687
	7.85	-0.406813		15.7	0.391043		15.7	-3.08564		15.682	-1.03507		15.225	0.682121		15.7	-0.560034		15.699	-1.01449		15.701	-8.31837
	7.9	0.190659		15.8	0.29057		15.8	-3.27952		15.782	-0.926576		15.325	0.303823		15.8	0.0479728		15.8	-1.11441		15.81	-8.38324
	7.95	-1.00993		15.9	-0.213201		15.9	-3.63609		15.881	-0.914777		15.426	-0.879531		15.9	1.38803		15.905	0.956847		15.9	-7.91578
	8	-1.34944		16	-0.737369		16	-3.21965		15.985	-0.61871		15.526	-1.58807		16	-0.498329		16	1.64778		16.005	-6.53631
	8.05	-0.695141		16.1	0.458286		16.1	-3.86981		16.091	-1.71319		15.626	-0.36057		16.1	0.270038		16.1	-0.00973789		16.104	-6.46786
	8.1	-0.289265		16.2	0.64919		16.2	-3.90409		16.181	-1.78828		15.726	-0.306472		16.2	-0.372395		16.2	-1.83387		16.224	-5.64913
	8.15	0.0600606		16.3	1.18701		16.3	-3.91339		16.281	-0.222768		15.827	0.40614		16.3	-0.335342		16.301	-2.13744		16.316	-6.49545
	8.2	0.961881		16.4	-0.950842		16.4	-3.3782		16.381	1.03367		15.926	1.29414		16.4	-0.104916		16.441	-3.58919		16.404	-5.57854
	8.25	1.6148		16.5	-1.03576		16.5	-3.80273		16.481	0.555756		16.026	1.30191		16.5	-0.990538		16.499	-1.98575		16.504	-7.60793
	8.3	0.639464		16.6	-0.94427		16.6	-4.11961		16.581	0.58674		16.129	0.744522		16.6	1.08635		16.6	-1.33064		16.601	-8.56601
	8.35	-0.622549		16.7	-2.25033		16.7	-3.64268		16.681	-1.32874		16.226	-0.265169		16.7	0.395553		16.701	0.33926		16.706	-8.66064
	8.4	-1.03987		16.8	-1.35639		16.8	-3.99559		16.786	-2.94334		16.327	-2.20451		16.8	-0.327039		16.807	0.517567		16.801	-7.94525
	8.45	-1.59281		16.9	-1.35556		16.9	-3.97313		16.881	-2.10293		16.425	-2.1675		16.9	-0.1618		16.9	0.452768		16.906	-8.6111
	8.5	-1.92158		17	-1.77229		17	-3.83619		16.981	-1.55948		16.527	-1.31556		17	0.419248		17.018	0.169501		17.006	-7.82241
	8.55	-1.96781		17.1	-1.6942		17.1	-3.83564		17.082	-0.489566		16.625	-0.447492		17.1	-1.38896		17.099	-0.574052		17.101	-8.0684
	8.6	-1.0273		17.2	-1.92877		17.2	-4.32429		17.181	0.645599		16.726	-1.13623		17.2	-0.201351		17.2	-0.979671		17.204	-7.056
	8.65	-0.075863		17.3	-3.79514		17.3	-3.85418		17.281	0.509664		16.826	-1.68812		17.3	-0.940891		17.306	-0.168907		17.302	-8.48713
	8.7	0.0319438		17.4	-1.93826		17.4	-3.55203		17.381	0.404007		16.926	-1.48984		17.4	-0.51938		17.4	1.73439		17.406	-8.66159
	8.75	0.261924		17.5	-3.27568		17.5	-4.11699		17.481	0.405048		17.028	-0.60783		17.5	0.450198		17.531	1.79708		17.501	-8.93632
	8.8	0.780067		17.6	-3.13862		17.6	-3.11701		17.585	-1.39626		17.128	-1.31567		17.6	0.141156		17.599	1.63386		17.607	-7.73882
	8.85	-0.0276186		17.7	-2.72495		17.7	-4.08386		17.681	-2.66771		17.227	-2.91319		17.7	0.00798344		17.702	0.0476434		17.7	-8.08109
	8.9	-0.628555		17.8	-3.63097		17.8	-3.65985		17.781	-3.3919		17.327	-3.79394		17.8	-0.24427		17.807	-0.776389		17.807	-8.05778
	8.95	-1.38875		17.9	-2.6071		17.9	-3.91496		17.881	-3.12662		17.429	-2.74124		17.9	-1.0702		17.901	-0.97071		17.902	-7.45807
	9	-1.45437		18	-3.42232		18	-4.07802		17.981	-2.37694		17.527	-1.2102		18	0.485404		18.043	-1.06466		18.005	-7.31658
	9.05	-0.637802		18.1	-3.73983		18.1	-4.17372		18.081	-1.19938		17.629	0.241512		18.1	1.08224		18.102	-1.88057		18.102	-8.09754
	9.1	-0.0758925		18.2	-3.38403		18.2	-4.0676		18.188	-1.06563		17.728	0.604123		18.2	-0.260609		18.202	-1.5357		18.206	-9.98139
	9.15	-0.314461		18.3	-3.53089		18.3	-4.56326		18.281	-2.28382		17.827	1.30303		18.3	-0.361848		18.307	-1.37984		18.3	-10.3011
	9.2	0.670378		18.4	-3.65694		18.4	-4.02549		18.381	-1.92745		17.927	1.4912		18.4	-0.10334		18.4	-0.230053		18.406	-9.28534
	9.25	0.885852		18.5	-4.14792		18.5	-4.01003		18.481	-2.60116		18.028	3.0739		18.5	-1.51255		18.539	0.420796		18.5	-9.96601
	9.3	0.537517		18.6	-4.0407		18.6	-3.90171		18.581	-3.28986		18.128	2.67367		18.6	-2.03856		18.6	-2.23157		18.605	-9.88783
	9.35	0.400503		18.7	-4.3543		18.7	-4.5306		18.681	-1.8201		18.227	1.46768		18.7	-2.31495		18.701	-3.28096		18.701	-8.75528
	9.4	0.457472		18.8	-4.17507		18.8	-3.96217		18.784	-0.915168		18.327	0.852555		18.8	-1.90457		18.806	-4.65921		18.805	-9.00917
	9.45	1.18508		18.9	-5.31976		18.9	-4.03559		18.888	-2.02169		18.423	0.153628		18.9	-1.96593		18.9	-4.32974		18.902	-8.79602
	9.5	-0.0452418		19	-3.64796		19	-4.63183		18.981	-1.9031		18.526	-1.51949		19	0.373479		19.033	-2.88017		19.004	-8.48623
	9.55	-0.91863		19.1	-4.11112		19.1	-4.3447		19.081	-1.94408		18.624	-1.89337		19.1	-2.60657		19.1	-2.55328		19.101	-7.35703
	9.6	-0.246075		19.2	-5.28582		19.2	-4.30213		19.182	-1.35357		18.725	-1.04619		19.2	-1.80811		19.206	-1.82079		19.21	-6.47796
	9.65	-0.147827		19.3	-5.01945		19.3	-4.67349		19.282	0.439152		18.826	-1.94782		19.3	-1.68882		19.301	-0.718811		19.311	-6.80709
	9.7	0.29366		19.4	-5.32363		19.4	-4.77946		19.381	1.31623		18.924	-2.30773		19.4	-2.4539		19.434	-1.03352		19.406	-7.80836
	9.75	0.444106		19.5	-4.68075		19.5	-4.56699		19.485	0.280685		19.027	-0.97841		19.5	-1.783		19.5	-0.664385		19.502	-8.67575
	9.8	0.706495		19.6	-5.2211		19.6	-4.4841		19.581	-0.765402		19.127	-0.260325		19.6	-1.72576		19.607	-1.14224		19.606	-10.8101
	9.85	1.30332		19.7	-4.61951		19.7	-4.58235		19.682	-1.21317		19.224	-0.754971		19.7	-3.77392		19.7	-3.06176		19.7	-10.8464
	9.9	0.96483		19.8	-5.48987		19.8	-5.17003		19.782	-0.932774		19.323	0.34064		19.8	-0.766941		19.829	-3.8419		19.803	-10.4708
	9.95	1.29172		19.9	-5.46698		19.9	-4.62452		19.881	-1.2583		19.424	-0.859381		19.9	-1.28367		19.9	-4.4571		19.905	-10.123
	10	0.775212		20	-6.17188		20	-4.48808		19.981	-1.23668		19.524	-0.923365		20	-2.26678		20.001	-4.99333		20.002	-10.2344
	10.05	0.0851377		20.1	-5.06992		20.1	-4.21674		20.085	-0.343789		19.623	-0.154098		20.1	-3.75425		20.1	-3.78897		20.108	-9.61935
	10.1	0.916172		20.2	-6.1005		20.2	-4.87359		20.181	0.0732538		19.724	-0.13525		20.2	-3.19828		20.219	-2.95929		20.204	-10.5833
	10.15	0.436549		20.3	-4.78104		20.3	-4.6877		20.284	-0.8155		19.824	-1.53681		20.3	-3.1411		20.3	-1.89064		20.306	-10.2805
	10.2	0.069179		20.4	-6.18291		20.4	-4.71533		20.382	-0.644588		19.924	-1.58214		20.4	-3.72285		20.407	-2.0177		20.4	-9.85678
	10.25	0.463616		20.5	-6.62552		20.5	-4.75786		20.482	-1.24365		20.023	-1.03719		20.5	-3.26578		20.5	-1.86192		20.506	-9.59104
	10.3	0.907318		20.6	-6.0368		20.6	-4.4584		20.587	-1.03085		20.125	-0.26239		20.6	-2.76693		20.64	-2.23333		20.606	-9.27096
	10.35	0.674965		20.7	-6.63576		20.7	-4.35349		20.681	-0.793301		20.224	-0.0620051		20.7	-2.61599		20.701	-1.80129		20.704	-9.65933
	10.4	-0.808368		20.8	-7.6704		20.8	-4.81322		20.781	-0.859223		20.324	-0.188305		20.8	-2.98348		20.807	-2.78211		20.801	-11.3812
	10.45	-1.53966		20.9	-6.17652		20.9	-3.8497		20.881	-1.80702		20.425	-0.155952		20.9	-4.37922		20.9	-3.2029		20.906	-12.9037
	10.5	-0.68766		21	-5.64807		21	-4.19713		20.982	-1.60275		20.524	0.385993		21	-4.54535		21.019	-3.14391		21	-13.991
	10.55	-0.928417		21.1	-6.00964		21.1	-4.60961		21.083	-1.96378		20.623	0.0898424		21.1	-2.841		21.112	-4.01898		21.106	-12.9468
	10.6	-1.51359		21.2	-7.20003		21.2	-4.64525		21.181	-2.0285		20.728	-0.575265		21.2	-4.44508		21.2	-4.56624		21.2	-11.5105
	10.65	-0.938253		21.3	-6.49276		21.3	-4.85439		21.282	-1.67808		20.826	-0.702809		21.3	-1.90529		21.301	-4.82057		21.303	-10.5891
	10.7	-0.222172		21.4	-6.63275		21.4	-4.4955		21.382	-0.717752		20.924	-2.28403		21.4	-2.54198		21.406	-6.09677		21.4	-9.52491
	10.75	-0.305373		21.5	-6.19033		21.5	-4.48162		21.482	-0.670061		21.028	-2.46583		21.5	-3.21319		21.501	-5.83646		21.504	-9.41922
	10.8	-0.60843		21.6	-7.46731		21.6	-4.19775		21.585	-0.4191		21.124	-2.74227		21.6	-3.4961		21.629	-3.7192		21.608	-10.9987
	10.85	-0.420215		21.7	-5.97807		21.7	-5.08065		21.694	-1.25479		21.225	-3.87747		21.7	-3.72675		21.707	-3.88408		21.71	-13.1348
	10.9	0.197844		21.8	-6.11075		21.8	-4.74913		21.782	-1.83647		21.324	-3.95894		21.8	-3.73571		21.8	-2.76554		21.81	-13.8341
	10.95	-0.773934		21.9	-5.96929		21.9	-4.04469		21.881	-2.54482		21.424	-3.35964		21.9	-3.50455		21.94	-1.94889		21.906	-12.8228
	11	-0.432169		22	-7.72924		22	-4.94597		21.982	-3.23307		21.525	-2.70087		22	-2.80019		22.006	-4.33072		22	-11.7602
	11.05	0.819611		22.1	-7.58357		22.1	-4.42248		22.086	-2.9553		21.624	-1.85232		22.1	-3.14387		22.101	-6.24523		22.107	-9.77966
	11.1	1.11777		22.2	-6.39423		22.2	-4.41817		22.193	-2.33359		21.726	-1.44844		22.2	-3.50513		22.224	-6.8275		22.2	-9.18425
	11.15	0.9219		22.3	-8.64189		22.3	-4.44732		22.282	-1.82092		21.825	-2.46069		22.3	-2.92141		22.307	-6.43097		22.303	-8.53245
	11.2	0.575302		22.4	-6.63066		22.4	-4.62361		22.382	0.253991		21.924	-3.46774		22.4	-3.96562		22.401	-3.41816		22.401	-9.53473
	11.25	0.339645		22.5	-6.79994		22.5	-4.48393		22.486	0.73357		22.024	-4.7277		22.5	-4.32519		22.526	-0.636543		22.506	-10.9837
	11.3	-0.61421		22.6	-6.99247		22.6	-4.28453		22.581	-0.245746		22.123	-5.60029		22.6	-3.37343		22.607	-1.52702		22.611	-11.3073
	11.35	-2.43327		22.7	-7.77866		22.7	-4.61601		22.682	0.117505		22.225	-5.11527		22.7	-3.65316		22.701	-4.07766		22.708	-11.7811
	11.4	-1.71194		22.8	-8.08405		22.8	-5.08025		22.782	-1.03417		22.324	-4.51222		22.8	-3.96259		22.846	-5.77257		22.8	-12.4839
	11.45	-1.32288		22.9	-7.13079		22.9	-4.66183		22.886	-2.2061		22.424	-3.21313		22.9	-4.11347		22.909	-5.88962		22.907	-12.6223
	11.5	-0.970966		23	-8.14138		23	-4.75711		22.982	-2.1143		22.525	-2.23078		23	-3.80885		23	-4.93541		23.007	-12.3262
	11.55	-0.693172		23.1	-7.36513		23.1	-4.77921		23.082	-1.36425		22.624	-2.19059		23.1	-4.39771		23.146	-4.91754		23.106	-12.8057
	11.6	-0.0866493		23.2	-6.72142		23.2	-5.18644		23.191	-1.09384		22.725	-4.74903		23.2	-3.26283		23.209	-5.7977		23.203	-13.0544
	11.65	0.667092		23.3	-7.48452		23.3	-4.26336		23.283	-0.355967		22.825	-5.87779		23.3	-3.84406		23.301	-6.48065		23.308	-13.8653
	11.7	0.74472		23.4	-7.42809		23.4	-4.40981		23.381	-0.416932		22.927	-8.19234		23.4	-3.90094		23.423	-7.11142		23.402	-12.1105
	11.75	0.107509		23.5	-7.97474		23.5	-3.86549		23.485	-0.990655		23.025	-6.55984		23.5	-3.74729		23.507	-7.34676		23.508	-10.9375
	11.8	0.0853863		23.6	-8.57318		23.6	-4.77356		23.581	-2.04421		23.124	-5.3945		23.6	-3.89936		23.601	-7.27027		23.6	-9.3101
	11.85	0.24912		23.7	-6.99258		23.7	-4.01376		23.682	-1.3114		23.224	-4.98608		23.7	-4.55988		23.73	-6.50768		23.706	-8.53563
	11.9	1.14072		23.8	-7.95566		23.8	-4.52258		23.784	-0.50732		23.327	-4.94648		23.8	-3.3482		23.813	-6.11386		23.803	-7.65856
	11.95	1.60895		23.9	-7.83919		23.9	-5.19437		23.882	-0.436802		23.425	-5.19829		23.9	-4.91256		23.901	-3.80793		23.906	-8.79738
	12	2.26932		24	-7.43602		24	-4.34134		23.983	-1.20127		23.526	-6.40188		24	-3.47196		24.005	-3.41751		24.003	-9.56501
	12.05	1.948		24.1	-8.00824		24.1	-5.01157		24.086	-2.17366		23.624	-5.71878		24.1	-3.41883		24.108	-3.21051		24.108	-11.2645
	12.1	1.97583		24.2	-8.34127		24.2	-4.40969		24.194	-3.03448		23.726	-5.72076		24.2	-4.30226		24.201	-4.94916		24.206	-11.3519
	12.15	0.961312		24.3	-8.186		24.3	-4.41406		24.282	-1.99011		23.825	-6.94984		24.3	-3.34123		24.303	-7.10199		24.306	-11.059
	12.2	0.197265		24.4	-7.20413		24.4	-4.4241		24.385	-1.23343		23.925	-7.24786		24.4	-3.7756		24.407	-8.10511		24.404	-10.8728
	12.25	0.326615		24.5	-7.19067		24.5	-5.05545		24.482	-1.48844		24.025	-7.78576		24.5	-4.20643		24.504	-6.86717		24.506	-11.5361
	12.3	0.319763		24.6	-8.22959		24.6	-4.68444		24.586	-1.52929		24.125	-7.53735		24.6	-4.33023		24.602	-6.43735		24.606	-11.8383
	12.35	-0.360643		24.7	-7.39799		24.7	-4.57577		24.682	-0.387102		24.228	-7.70113		24.7	-4.45382		24.707	-4.64236		24.701	-11.7515
	12.4	-1.66235		24.8	-7.44327		24.8	-4.48562		24.788	-0.061963		24.325	-6.75933		24.8	-4.4146		24.801	-5.97885		24.805	-11.7015
	12.45	-2.75937		24.9	-8.93494		24.9	-3.93099		24.882	-0.699249		24.425	-7.03256		24.9	-4.6098		24.94	-7.82715		24.901	-11.0529
	12.5	-2.55476		25	-6.94899		25	-4.94303		24.985	-2.31719		24.526	-7.29276		25	-4.23252		25.007	-7.89165		25.008	-10.9828
	12.55	-2.50207		25.1	-8.12156					25.096	-3.80898		24.63	-7.47528		25.1	-6.24928		25.1	-6.96142		25.106	-11.3609
	12.6	-1.90435		25.2	-7.5954					25.182	-3.46211		24.729	-6.92202		25.2	-5.34203		25.227	-5.9175		25.207	-11.1592
	12.65	0.0351084		25.3	-7.19673					25.283	-1.52049		24.825	-7.31525		25.3	-6.31994		25.307	-5.40328		25.302	-11.0807
	12.7	1.50891		25.4	-8.4977					25.382	-1.0108		24.926	-7.47745		25.4	-4.50944		25.399	-7.12431		25.408	-10.398
	12.75	1.28512		25.5	-7.42564					25.485	-1.60131		25.026	-8.70696		25.5	-5.10925		25.526	-7.37035		25.501	-10.3218
	12.8	0.235104		25.6	-7.76479					25.581	-2.46502		25.125	-8.57418		25.6	-5.39234		25.607	-7.71297		25.607	-12.2045
	12.85	-0.622948		25.7	-8.15847					25.685	-2.76312		25.226	-8.75057		25.7	-6.36799		25.701	-7.00501		25.701	-12.8785
	12.9	-0.842755		25.8	-8.26764					25.782	-2.02633		25.326	-8.86641		25.8	-5.5598		25.838	-7.53854		25.808	-14.5977
	12.95	-1.17197		25.9	-8.20416					25.885	-2.2309		25.425	-8.54818		25.9	-5.22389		25.913	-7.54091		25.905	-15.2539
	13	-1.21508		26	-7.42751					25.981	-2.86086		25.526	-7.85362		26	-5.14958		26.003	-8.15682		26.006	-14.8362
	13.05	0.244682		26.1	-8.62071					26.084	-2.24516		25.625	-8.26226		26.1	-5.89294		26.114	-7.53632		26.104	-14.8992
	13.1	0.850888		26.2	-8.028					26.194	-3.12698		25.726	-7.63127		26.2	-6.15012		26.208	-6.7901		26.207	-14.271
	13.15	1.12326		26.3	-8.32776					26.291	-1.68337		25.826	-7.55129		26.3	-5.58115		26.301	-6.44041		26.3	-14.1287
	13.2	0.749044		26.4	-9.02975					26.381	-1.30937		25.925	-7.67832		26.4	-5.09622		26.436	-6.62565		26.405	-14.1329
	13.25	0.598274		26.5	-8.29508					26.485	-1.31398		26.026	-6.45648		26.5	-5.11442		26.512	-6.05717		26.502	-13.5156
	13.3	0.655581		26.6	-8.93364					26.585	-2.29851		26.126	-5.56078		26.6	-4.01127		26.601	-6.33746		26.606	-14.007
	13.35	0.104172		26.7	-9.15798					26.685	-2.27376		26.226	-6.22881		26.7	-3.93845		26.741	-5.80371		26.705	-14.2251
	13.4	-0.229972		26.8	-8.80741					26.787	-3.40755		26.326	-7.04083		26.8	-5.64302		26.812	-5.42192		26.805	-13.5521
	13.45	-0.494849		26.9	-9.7958					26.886	-1.63107		26.426	-8.87864		26.9	-5.23525		26.932	-7.5586		26.904	-13.63
	13.5	-0.70406		27	-9.06642					26.986	-2.23433		26.526	-9.94062		27	-5.53835		27.004	-7.9399		27.004	-13.1937
	13.55	-0.480369		27.1	-8.59472					27.081	-2.94748		26.625	-9.72236		27.1	-5.27627		27.1	-9.06764		27.123	-12.4402
	13.6	-0.139216		27.2	-8.28267					27.186	-4.78034		26.727	-8.78824		27.2	-6.09328		27.201	-8.43879		27.236	-11.5644
	13.65	0.324578		27.3	-8.38631					27.284	-5.07103		26.826	-7.98623		27.3	-4.80791		27.308	-5.74624		27.306	-11.7426
	13.7	0.663348		27.4	-9.05547					27.386	-4.90132		26.926	-6.89608		27.4	-4.80986		27.407	-4.87854		27.408	-12.1385
	13.75	0.634845		27.5	-8.61745					27.481	-3.75855		27.026	-7.18244		27.5	-4.66771		27.501	-6.53551		27.51	-12.8815
	13.8	1.03447		27.6	-8.30423					27.584	-3.18758		27.125	-7.70306		27.6	-5.81561		27.606	-6.5653		27.602	-11.8856
	13.85	0.81818		27.7	-8.70268					27.682	-4.28183		27.225	-8.65924		27.7	-5.53175		27.699	-7.28269		27.706	-11.8248
	13.9	1.00368		27.8	-8.02034					27.785	-4.21087		27.324	-8.82354		27.8	-4.59234		27.811	-7.1783		27.804	-12.0841
	13.95	0.78381		27.9	-8.39973					27.896	-3.2229		27.424	-9.21629		27.9	-4.90939		27.9	-5.71625		27.918	-12.6121
	14	0.788549		28	-8.88872					27.981	-3.09618		27.525	-8.33885		28	-5.10663		28.035	-5.478		28.009	-12.8227
	14.05	0.252332		28.1	-9.51517					28.085	-1.83402		27.625	-8.3715		28.1	-5.07025		28.101	-6.70784		28.123	-13.6686
	14.1	-0.74584		28.2	-8.37794					28.181	-2.48313		27.724	-7.85762		28.2	-5.37208		28.212	-7.25219		28.21	-13.5937
	14.15	-0.249965		28.3	-8.41323					28.282	-3.87102		27.825	-8.55395		28.3	-5.88357		28.307	-7.33704		28.309	-13.2577
	14.2	0.444159		28.4	-8.54243					28.382	-3.5494		27.928	-8.52686		28.4	-4.52289		28.401	-8.33719		28.409	-12.7742
	14.25	0.707143		28.5	-8.55721					28.485	-4.11151		28.025	-9.13185		28.5	-6.33115		28.539	-8.28606		28.501	-12.5073
	14.3	0.30634		28.6	-7.50948					28.581	-5.18822		28.127	-8.76215		28.6	-6.00097		28.601	-7.0621		28.608	-11.8878
	14.35	0.147643		28.7	-9.36785					28.685	-4.77138		28.225	-9.65305		28.7	-5.47021		28.723	-7.08026		28.706	-11.882
	14.4	-0.514728		28.8	-8.99617					28.781	-5.55669		28.325	-8.89957		28.8	-5.36514		28.806	-6.0411		28.807	-11.9967
	14.45	-1.36903		28.9	-8.7422					28.886	-5.72202		28.425	-9.00244		28.9	-5.81539		28.9	-5.82568		28.901	-12.4074
	14.5	-1.45068		29	-9.31012					28.981	-4.79675		28.526	-7.59143		29	-5.44927		29.031	-5.72303		29.021	-12.9242
	14.55	-0.978496		29.1	-8.58448					29.082	-5.33067		28.625	-8.56413		29.1	-5.39685		29.101	-6.03111		29.105	-12.8166
	14.6	-0.579913		29.2	-8.46521					29.181	-5.73822		28.726	-7.78659		29.2	-5.96308		29.233	-5.99577		29.202	-13.1504
	14.65	-0.0334366		29.3	-9.00147					29.282	-5.48847		28.824	-8.66713		29.3	-4.06379		29.31	-7.11372		29.306	-13.6601
	14.7	0.273077		29.4	-8.18885					29.381	-3.7091		28.924	-8.47079		29.4	-5.65211		29.401	-7.67372		29.403	-12.7905
	14.75	0.168088		29.5	-8.52079					29.485	-4.08354		29.025	-9.49923		29.5	-6.26514		29.509	-8.74904		29.509	-12.8363
	14.8	-0.607055		29.6	-9.82503					29.582	-4.9715		29.125	-9.65856		29.6	-5.67371		29.608	-9.43981		29.603	-14.3409
	14.85	-0.691687		29.7	-9.88372					29.682	-6.5314		29.226	-10.9879		29.7	-6.47937		29.7	-9.77666		29.708	-14.7252
	14.9	-0.615075		29.8	-8.89334					29.781	-7.57273		29.325	-9.44258		29.8	-5.21189		29.811	-9.9433		29.8	-15.9017
	14.95	-0.622961		29.9	-8.34272					29.886	-7.91375		29.424	-8.81257		29.9	-4.89652		29.901	-9.85033		29.907	-15.7941
	15	-0.952116		30	-8.59267					29.982	-5.13561		29.526	-8.19713		30	-5.15213		30.012	-9.4421		30.005	-14.9456
	15.05	-1.64215		30.1	-8.39586					30.086	-4.62071		29.625	-9.67368		30.1	-4.31082		30.102	-8.62337		30.107	-13.7848
	15.1	-1.57899		30.2	-8.77916					30.181	-5.94353		29.725	-10.1261		30.2	-5.14234		30.222	-8.28689		30.205	-12.093
	15.15	-2.28345		30.3	-10.0729					30.282	-6.29717		29.824	-10.9389		30.3	-6.30903		30.3	-6.83218		30.305	-11.8878
	15.2	-3.05966		30.4	-9.40253					30.381	-7.07196		29.926	-10.357		30.4	-6.00926		30.408	-5.47188		30.404	-12.8923
	15.25	-2.15512		30.5	-9.57322					30.486	-7.85932		30.025	-8.94778		30.5	-5.21381		30.501	-5.47033		30.508	-13.945
	15.3	-1.26132		30.6	-9.69863					30.581	-7.19382		30.124	-9.69599		30.6	-6.04663		30.604	-6.43526		30.607	-13.7917
	15.35	1.39854		30.7	-8.37343					30.685	-8.22902		30.226	-8.76553		30.7	-5.94599		30.7	-6.89182		30.709	-13.5158
	15.4	2.00584		30.8	-9.54905					30.781	-9.06972		30.328	-9.24731		30.8	-6.09942		30.807	-7.38913		30.8	-13.1726
	15.45	1.23903		30.9	-8.10386					30.882	-7.35701		30.425	-9.30175		30.9	-6.01325		30.939	-7.04535		30.907	-12.1952
	15.5	1.01377		31	-9.13144					30.991	-6.54876		30.525	-9.69133		31	-7.65848		31	-7.28603		31.015	-11.3963
	15.55	0.845129		31.1	-8.90717					31.082	-5.2761		30.625	-10.0866		31.1	-5.80459		31.108	-7.19814		31.11	-11.6618
	15.6	0.178181		31.2	-9.05171					31.185	-5.2178		30.725	-11.5103		31.2	-6.68437		31.201	-7.92808		31.22	-12.0232
	15.65	-0.242005		31.3	-8.11386					31.281	-6.09617		30.825	-10.9283		31.3	-6.45634		31.344	-7.54467		31.311	-12.8501
	15.7	0.229971		31.4	-9.28859					31.382	-6.37649		30.925	-11.9356		31.4	-5.07258		31.401	-6.6603		31.42	-12.9158
	15.75	1.62729		31.5	-9.59689					31.483	-6.2215		31.027	-10.5006		31.5	-4.87486		31.508	-7.42539		31.509	-13.6694
	15.8	1.36645		31.6	-9.60346					31.585	-7.03656		31.128	-9.98379		31.6	-6.35445		31.609	-8.75566		31.612	-14.7775
	15.85	0.186515		31.7	-9.83842					31.691	-8.01294		31.225	-9.35507		31.7	-6.8809		31.708	-7.89273		31.707	-14.6207
	15.9	-0.476609		31.8	-8.4704					31.785	-9.58894		31.326	-8.83577		31.8	-5.49759		31.811	-8.85158		31.802	-13.9066
	15.95	0.419265		31.9	-9.25631					31.881	-9.36885		31.425	-10.0676		31.9	-4.66917		31.9	-8.25792		31.92	-13.2739
	16	0.528934		32	-7.5544					31.982	-8.24719		31.526	-11.6201		32	-5.89167		32.005	-7.9633		32.007	-12.0359
	16.05	0.410309		32.1	-8.60507					32.082	-6.76425		31.626	-12.2935		32.1	-6.41561		32.1	-8.51019		32.101	-10.3669
	16.1	1.32879		32.2	-8.91988					32.186	-5.62506		31.728	-11.2693		32.2	-4.97021		32.208	-9.85015		32.208	-9.3223
	16.15	2.35761		32.3	-8.70698					32.281	-6.77278		31.826	-10.078		32.3	-5.5465		32.328	-9.79904		32.3	-9.11776
	16.2	2.41271		32.4	-8.83999					32.386	-8.55116		31.926	-9.03672		32.4	-6.06124		32.407	-11.4629		32.409	-9.75572
	16.25	2.0818		32.5	-9.41028					32.497	-8.96857		32.028	-10.0072		32.5	-5.07407		32.502	-10.3064		32.524	-10.2931
	16.3	0.843275		32.6	-8.51016					32.586	-8.39212		32.127	-10.7451		32.6	-6.249		32.604	-9.22713		32.609	-10.4482
	16.35	1.21535		32.7	-8.44647					32.682	-6.68013		32.226	-12.1817		32.7	-5.83524		32.702	-7.59372		32.707	-11.6813
	16.4	0.566558		32.8	-8.60208					32.785	-5.3757		32.325	-10.7251		32.8	-6.69337		32.807	-7.22562		32.809	-12.9653
	16.45	-0.292306		32.9	-9.56464					32.881	-4.85352		32.427	-10.7512		32.9	-5.96328		32.901	-6.67789		32.917	-13.9855
	16.5	-0.538816		33	-8.99539					32.986	-5.107		32.528	-10.127		33	-5.68599		33.026	-8.70313		33.01	-13.3806
	16.55	-0.127235		33.1	-9.12792					33.091	-6.61393		32.628	-10.076		33.1	-5.51467		33.103	-9.39877		33.105	-12.8282
	16.6	0.204423		33.2	-10.2381					33.19	-7.08329		32.727	-10.0304		33.2	-6.02677		33.209	-9.44681		33.208	-12.3193
	16.65	0.179325		33.3	-9.62884					33.291	-8.78513		32.826	-10.6881		33.3	-5.9805		33.304	-8.57793		33.303	-12.5139
	16.7	-0.0885112		33.4	-7.94307					33.396	-8.72616		32.926	-9.17638		33.4	-5.51154		33.414	-8.67613		33.408	-11.3278
	16.75	-0.234291		33.5	-9.17538					33.485	-6.8017		33.027	-9.31269		33.5	-5.37219		33.499	-8.82882		33.518	-12.0086
	16.8	-1.19905		33.6	-8.86013					33.581	-5.71744		33.127	-9.58505		33.6	-5.39762		33.608	-8.29825		33.607	-13.0516
	16.85	-1.79442		33.7	-8.93081					33.685	-4.93985		33.226	-9.32549		33.7	-5.62875		33.701	-8.02917		33.704	-13.0053
	16.9	-1.64007		33.8	-7.94045					33.792	-4.99178		33.33	-9.29146		33.8	-5.82494		33.803	-8.32538		33.809	-11.7226
	16.95	-0.852044		33.9	-8.75712					33.885	-8.36728		33.427	-9.56919		33.9	-6.25191		33.906	-7.75232		33.907	-11.3231
	17	-0.974095		34	-8.20203					33.99	-9.7386		33.526	-9.25304		34	-6.81059		34.001	-9.41993		34.007	-11.612
	17.05	-1.39881		34.1	-9.00266					34.082	-9.74086		33.63	-8.70842		34.1	-6.30961		34.135	-11.4766		34.104	-12.3521
	17.1	-0.390672		34.2	-9.13486					34.185	-9.4584		33.727	-9.31519		34.2	-5.80711		34.2	-11.0205		34.209	-12.8768
	17.15	-0.585492		34.3	-9.02743					34.283	-8.50904		33.828	-9.78789		34.3	-5.46822		34.309	-9.85122		34.308	-13.1883
	17.2	-0.963384		34.4	-8.67531					34.386	-6.9118		33.927	-9.80411		34.4	-6.38253		34.401	-8.01369		34.415	-12.7504
	17.25	-0.581085		34.5	-8.89074					34.481	-6.4583		34.027	-9.88586		34.5	-5.3887		34.501	-6.97141		34.501	-10.4549
	17.3	-0.355176		34.6	-9.01006					34.585	-7.31004		34.129	-10.6908		34.6	-5.24361		34.613	-7.47497		34.601	-8.26687
	17.35	-0.90135		34.7	-8.54436					34.681	-9.18295		34.227	-10.4619		34.7	-5.7224		34.7	-9.19407		34.709	-7.81471
	17.4	-1.30097		34.8	-8.42459					34.786	-9.72394		34.328	-11.6124		34.8	-6.97069		34.814	-10.3568		34.812	-8.62074
	17.45	-1.81503		34.9	-8.88384					34.882	-10.6078		34.427	-12.575		34.9	-5.54818		34.907	-11.0067		34.908	-9.18611
	17.5	-1.31169		35	-8.6739					34.985	-9.80212		34.527	-12.5998		35	-5.54618		35.002	-8.9012		35.009	-11.2054
	17.55	-0.815441								35.094	-8.58728		34.627	-10.6087		35.1	-5.93447		35.106	-9.67502		35.109	-13.5613
	17.6	-0.280989								35.185	-7.65449		34.73	-8.3173		35.2	-4.79966		35.207	-9.35628		35.2	-15.0397
	17.65	0.109963								35.293	-8.50121		34.827	-7.83229		35.3	-6.30522		35.3	-9.3318		35.308	-14.5102
	17.7	0.378885								35.386	-8.14042		34.928	-9.58289		35.4	-4.39425		35.406	-9.05604		35.403	-13.6783
	17.75	-0.432193								35.481	-7.97815		35.027	-11.2524		35.5	-6.03128		35.515	-9.30658		35.508	-13.5093
	17.8	-0.016371								35.585	-8.49925		35.128	-12.2456		35.6	-4.56851		35.6	-7.57528		35.604	-13.6706
	17.85	-0.812725								35.681	-8.56372		35.227	-12.1911		35.7	-6.05347		35.715	-7.93547		35.709	-12.8841
	17.9	-1.24431								35.792	-8.29173		35.329	-10.2502		35.8	-5.6199		35.806	-7.49095		35.811	-12.9588
	17.95	-0.453828								35.882	-8.96986		35.427	-10.0295		35.9	-5.74078		35.9	-8.01351		35.907	-14.0014
	18	0.671683								35.981	-8.89056		35.528	-10.2053		36	-5.70212		36.032	-9.54135
	18.05	0.949743								36.084	-9.61707		35.635	-9.63303		36.1	-5.8113		36.102	-10.9594
	18.1	1.41552								36.186	-9.51146		35.727	-9.45346		36.2	-6.67537		36.207	-11.5213
	18.15	0.88395								36.283	-8.52604		35.827	-10.0048		36.3	-4.72384		36.301	-10.5962
	18.2	1.10258								36.386	-7.49963		35.926	-10.4282		36.4	-5.90196		36.445	-10.4662
	18.25	0.0381243								36.483	-7.06143		36.026	-11.2245		36.5	-5.50423		36.508	-9.56551
	18.3	-0.741835								36.581	-6.80928		36.126	-11.0884					36.607	-9.0566
	18.35	-0.72081								36.687	-8.48347		36.226	-11.2167					36.702	-8.66973
	18.4	-0.707352								36.781	-9.10484		36.326	-10.922					36.815	-10.0506
	18.45	-0.877152								36.886	-9.11583		36.426	-9.36813					36.905	-9.30563
	18.5	-1.3764								36.982	-8.75082		36.524	-8.22642					37.001	-9.93888
	18.55	-1.25185								37.086	-9.60429		36.626	-7.96382					37.121	-9.68319
	18.6	-2.00936								37.194	-9.60141		36.727	-7.83622					37.202	-9.33654
	18.65	-1.86309								37.285	-8.68391		36.826	-8.20427					37.308	-9.2087
	18.7	-2.74856								37.424	-7.95799		36.926	-7.79091					37.401	-11.6545
	18.75	-2.03738								37.485	-7.3695		37.028	-7.30262					37.515	-10.5657
	18.8	-1.80346								37.581	-6.50329		37.126	-7.40982					37.601	-8.61767
	18.85	-1.59024								37.686	-8.04357		37.227	-8.46225					37.708	-9.71822
	18.9	-1.90839								37.782	-9.46447		37.328	-9.88106					37.801	-10.264
	18.95	-0.561717								37.886	-9.62902		37.426	-11.4374					37.909	-11.0358
	19	-2.05277								37.982	-9.77028		37.527	-11.1478					38.005	-12.0555
	19.05	-1.60609								38.086	-8.30351		37.627	-10.5288					38.102	-9.38864
	19.1	-2.3857								38.182	-8.73509		37.726	-9.80656					38.236	-6.47199
	19.15	-1.34439								38.283	-8.46682		37.825	-9.34321					38.302	-6.83215
	19.2	-0.471236								38.381	-9.8281		37.926	-10.0343					38.427	-7.71209
	19.25	0.602221								38.486	-10.2667		38.028	-12.2775					38.5	-9.95653
	19.3	1.04808								38.582	-9.44132		38.129	-12.6643					38.607	-11.058
	19.35	2.0358								38.686	-6.47835		38.227	-11.8517					38.702	-10.4425
	19.4	0.838815								38.782	-6.03329		38.327	-11.2688					38.802	-10.0759
	19.45	-0.364524								38.886	-5.58776		38.428	-10.1548					38.908	-8.76025
	19.5	-0.52187								38.981	-7.27517		38.527	-8.0023					39.014	-9.85577
	19.55	-0.524222								39.083	-7.72238		38.627	-8.38548					39.115	-10.8553
	19.6	-0.0396008								39.183	-8.86091		38.727	-9.74074					39.207	-11.1977
	19.65	0.320996								39.284	-8.68103		38.829	-10.4175					39.301	-9.54358
	19.7	0.432437								39.381	-8.91264		38.927	-11.5562					39.404	-9.09496
	19.75	1.21673								39.486	-10.5786		39.026	-11.1092					39.515	-7.49093
	19.8	1.18126								39.581	-11.255		39.127	-9.106					39.601	-8.33547
	19.85	0.428079								39.686	-9.49667		39.224	-9.53057					39.716	-8.51292
	19.9	0.942172								39.782	-8.95551		39.326	-11.0574					39.813	-9.49071
	19.95	0.503481								39.885	-9.16255		39.426	-11.2945					39.902	-8.92576
	20	1.07136								39.981	-8.64058		39.528	-11.2249					40.009	-10.18
	20.05	1.22815								40.085	-8.77166		39.628	-10.3323					40.109	-9.40803
	20.1	1.19614								40.181	-9.26038		39.729	-9.90991					40.202	-10.294
	20.15	1.30458								40.283	-9.13509		39.825	-10.6923					40.344	-10.7306
	20.2	1.03713								40.386	-8.33209		39.928	-11.6982					40.406	-12.4713
	20.25	0.255036								40.481	-8.6579		40.025	-11.6591					40.501	-12.3704
	20.3	-0.41728								40.585	-8.62399		40.129	-10.907					40.637	-11.4055
	20.35	-0.782396								40.681	-9.43961		40.224	-10.7539					40.714	-8.1314
	20.4	0.252758								40.786	-10.1761		40.348	-11.5409					40.801	-6.95319
	20.45	0.766472								40.881	-10.8571		40.421	-12.8424					40.913	-7.4742
	20.5	-0.251755								40.987	-10.6795		40.521	-13.2164					41.009	-8.58451
	20.55	0.0218013								41.082	-9.65782		40.621	-12.5246					41.11	-9.62467
	20.6	0.725599								41.186	-9.04606		40.722	-11.7032					41.219	-10.255
	20.65	0.256217								41.285	-8.82811		40.821	-11.691					41.311	-9.18192
	20.7	-0.135844								41.383	-8.68276		40.921	-11.766					41.403	-9.11502
	20.75	-0.0106553								41.483	-8.93693		41.021	-12.4726					41.526	-9.35153
	20.8	-0.793788								41.584	-9.5151		41.123	-11.7381					41.601	-9.74345
	20.85	-1.0162								41.697	-8.93065		41.222	-11.1725					41.708	-10.7833
	20.9	-1.94392								41.787	-9.31956		41.321	-10.8552					41.803	-11.6305
	20.95	-1.582								41.891	-10.0747		41.422	-10.9279					41.926	-10.2923
	21	-1.65502								41.987	-9.85188		41.521	-11.0421					42.004	-9.66565
	21.05	-2.11463								42.082	-9.81443		41.621	-10.439					42.108	-8.25238
	21.1	-1.23782								42.182	-8.88921		41.721	-9.92666					42.201	-8.92828
	21.15	-1.38116								42.284	-8.15137		41.821	-10.2933					42.315	-8.81303
	21.2	-1.92532								42.388	-9.15334		41.921	-10.0305					42.402	-9.64517
	21.25	-1.64724								42.482	-10.0385		42.021	-11.3514					42.503	-8.55061
	21.3	-2.21977								42.587	-9.72629		42.123	-11.5401					42.602	-9.06219
	21.35	-2.56073								42.683	-9.71828		42.221	-11.7423					42.737	-8.642
	21.4	-2.78294								42.787	-9.25511		42.321	-12.857					42.801	-9.99241
	21.45	-2.8129								42.882	-9.64118		42.422	-12.8457					42.903	-11.35
	21.5	-3.30922								42.988	-9.23337		42.521	-12.5116					43.016	-12.4321
	21.55	-3.79651								43.082	-8.1689		42.621	-13.4011					43.101	-11.1719
	21.6	-3.49284								43.187	-7.67252		42.722	-12.7391					43.207	-9.94231
	21.65	-2.60552								43.284	-7.2203		42.822	-13.3905					43.303	-7.73305
	21.7	-2.32135								43.387	-7.66873		42.924	-13.2228					43.41	-6.83397
	21.75	-2.26825								43.481	-9.66102		43.023	-11.4531					43.507	-8.32914
	21.8	-2.03117								43.586	-9.66741		43.124	-11.125					43.61	-9.69822
	21.85	-2.91771								43.682	-10.2232		43.224	-10.2629					43.702	-9.89779
	21.9	-4.53628								43.787	-10.0508		43.324	-9.31756					43.808	-10.4006
	21.95	-4.68594								43.882	-9.12238		43.424	-9.77953					43.903	-10.2216
	22	-4.90479								43.987	-8.97		43.523	-10.482					44.018	-9.147
	22.05	-4.24951								44.086	-9.50026		43.623	-10.5322					44.11	-8.75679
	22.1	-4.85849								44.183	-7.98589		43.725	-11.0236					44.202	-8.86015
	22.15	-5.22236								44.284	-9.00001		43.85	-10.1747					44.305	-9.66817
	22.2	-4.82868								44.404	-8.78829		43.923	-9.33691					44.402	-11.0321
	22.25	-4.997								44.487	-8.43776		44.023	-10.1289					44.508	-11.6257
	22.3	-4.78182								44.582	-9.73082		44.123	-10.3318					44.603	-11.589
	22.35	-3.49903								44.687	-10.8207		44.223	-10.4538					44.707	-10.3699
	22.4	-3.00226								44.781	-9.42179		44.323	-10.6948					44.801	-9.26527
	22.45	-3.51484								44.886	-8.88051		44.422	-10.8307					44.908	-9.22015
	22.5	-3.91587								44.983	-8.89251		44.523	-10.8802					45.001	-9.00544
	22.55	-3.98533								45.087	-8.77092		44.622	-11.5436					45.13	-8.21037
	22.6	-4.28935								45.182	-9.55358		44.723	-10.5199					45.203	-7.42257
	22.65	-5.26058								45.284	-10.3651		44.823	-9.58009					45.303	-6.38292
	22.7	-5.65879								45.385	-9.31695		44.927	-9.77424					45.413	-6.18709
	22.75	-5.33518								45.486	-9.34204		45.024	-10.6397					45.535	-7.10772
	22.8	-5.15934								45.588	-10.4198		45.123	-12.2696					45.608	-8.49011
	22.85	-6.21604								45.683	-10.7745		45.223	-12.552					45.702	-9.74957
	22.9	-5.84278								45.783	-10.7788		45.323	-13.1259					45.805	-10.264
	22.95	-6.35327								45.887	-10.6017		45.424	-12.2287					45.901	-10.1843
	23	-6.51229								45.985	-10.1462		45.523	-11.6774					46.004	-10.0739
	23.05	-7.19809								46.087	-9.61849		45.623	-11.6676					46.102	-9.43633
	23.1	-7.03127								46.183	-10.4673		45.723	-12.5313					46.206	-9.46228
	23.15	-6.55169								46.286	-9.86874		45.823	-11.9574					46.307	-10.3203
	23.2	-6.79287								46.383	-8.86284		45.923	-11.9631					46.404	-10.2504
	23.25	-7.1112								46.486	-8.64734		46.024	-10.8037					46.51	-9.95756
	23.3	-6.67452								46.583	-9.00378		46.123	-9.90628					46.608	-9.74613
	23.35	-6.76087								46.686	-8.35893		46.223	-10.0944					46.705	-8.92613
	23.4	-6.73953								46.782	-9.53983		46.323	-12.0806					46.822	-9.70415
	23.45	-6.71935								46.887	-8.75717		46.423	-13.0299					46.909	-9.33449
	23.5	-6.08461								46.981	-8.84358		46.523	-13.0171					47.001	-8.57429
	23.55	-6.2285								47.087	-8.4677		46.624	-12.1364					47.108	-7.79603
	23.6	-7.98746								47.19	-8.13356		46.723	-11.1294					47.209	-8.78014
	23.65	-8.64575								47.283	-8.61909		46.825	-10.5939					47.3	-9.0764
	23.7	-8.71481								47.387	-9.24197		46.923	-11.0475					47.411	-9.67348
	23.75	-8.66241								47.487	-8.845		47.024	-9.9704					47.509	-9.45265
	23.8	-8.74247								47.584	-10.0313		47.122	-11.1613					47.602	-8.91526
	23.85	-8.87799								47.687	-10.0001		47.224	-10.7196					47.725	-7.68008
	23.9	-8.05868								47.782	-9.61225		47.323	-11.1184					47.814	-8.01268
	23.95	-7.99351								47.887	-10.0211		47.423	-10.5641					47.902	-8.25496
	24	-7.9657								47.982	-10.5177		47.524	-9.7298					48.006	-8.96882
	24.05	-7.46354								48.087	-9.60513		47.628	-7.75801					48.1	-10.249
	24.1	-6.85867								48.182	-9.49428		47.727	-10.0831					48.208	-10.6177
	24.15	-7.14772								48.282	-9.35272		47.83	-10.945					48.301	-10.6313
	24.2	-7.60948								48.383	-8.95971		47.926	-12.8735					48.408	-10.7195
	24.25	-7.87756								48.488	-9.45218		48.023	-14.4					48.5	-11.1137
	24.3	-8.49808								48.582	-9.45142		48.124	-13.6565					48.609	-11.6304
	24.35	-8.10658								48.687	-9.47483		48.224	-12.4122					48.702	-10.1199
	24.4	-7.38013								48.781	-9.93416		48.323	-13.3295					48.809	-8.47722
	24.45	-7.07625								48.887	-9.95254		48.424	-13.835					48.9	-7.36399
	24.5	-7.21897								48.981	-9.91887		48.523	-13.7443					49.002	-7.23592
	24.55	-7.79666								49.086	-9.7136		48.624	-13.3179
	24.6	-7.83726								49.205	-6.96957		48.723	-12.2925
	24.65	-7.5841								49.288	-6.75657		48.823	-11.2571
	24.7	-8.33728								49.385	-7.83612		48.923	-11.286
	24.75	-7.57915								49.494	-8.14436		49.024	-11.2707
	24.8	-8.10858								49.588	-9.69012		49.123	-10.9782
	24.85	-8.43934								49.702	-10.8887		49.225	-11.3875
	24.9	-8.67602								49.787	-9.28339		49.324	-10.6175
	24.95	-8.77128								49.884	-9.30112		49.424	-10.7901
	25	-9.54358								49.988	-9.49833		49.524	-11.6259
	25.05	-9.65401								50.084	-7.69476		49.624	-11.6487
	25.1	-9.94088								50.188	-8.16455		49.724	-11.9931
	25.15	-10.3022								50.295	-8.47647		49.823	-13.1278
	25.2	-10.7628								50.385	-8.59914		49.923	-11.3297
	25.25	-10.2764								50.487	-9.49393		50.024	-10.3034
	25.3	-9.77612								50.592	-10.5702		50.124	-11.1511
	25.35	-8.571								50.688	-10.7616		50.224	-11.2768
	25.4	-8.5603								50.781	-12.0974		50.324	-11.1053
	25.45	-7.16649								50.887	-12.224		50.425	-12.515
	25.5	-7.00554								50.981	-12.1342		50.524	-12.8239
	25.55	-7.32757								51.087	-10.7711		50.635	-11.9917
	25.6	-7.61289								51.184	-10.0882		50.729	-13.394
	25.65	-7.56181								51.287	-8.95395		50.825	-12.5503
	25.7	-7.25975								51.391	-8.89236		50.923	-11.6481
	25.75	-7.11982								51.5	-9.27504		51.025	-11.6551
	25.8	-7.74972								51.588	-8.9876		51.124	-10.9153
	25.85	-7.75687								51.682	-9.52185		51.224	-11.3736
	25.9	-8.74532								51.789	-10.3741		51.324	-13.7302
	25.95	-9.08387								51.883	-8.74318		51.423	-14.8538
	26	-9.56256								51.986	-8.15473		51.524	-14.8831
	26.05	-9.26613								52.084	-7.57047		51.625	-13.9355
	26.1	-8.61187								52.19	-6.73415		51.724	-11.1328
	26.15	-9.20159								52.293	-7.05835		51.824	-9.95003
	26.2	-9.73346								52.388	-7.72432		51.928	-11.047
	26.25	-10.1458								52.5	-9.01624		52.023	-13.1732
	26.3	-9.79408								52.59	-10.5596		52.124	-13.424
	26.35	-10.2108								52.687	-11.3913		52.226	-14.3437
	26.4	-10.2242								52.787	-11.8468		52.324	-13.7435
	26.45	-10.3169								52.885	-12.0176		52.423	-12.7561
	26.5	-10.5944								52.987	-11.0293		52.526	-11.9046
	26.55	-11.2508								53.083	-10.9799		52.624	-11.8717
	26.6	-11.2803								53.187	-10.2381		52.725	-11.6604
	26.65	-10.8179								53.297	-9.60676		52.824	-12.3297
	26.7	-10.117								53.386	-9.23038		52.926	-11.3538
	26.75	-10.8677								53.486	-9.38484		53.024	-10.7505
	26.8	-9.49819								53.588	-9.21764		53.125	-10.2714
	26.85	-9.74503								53.695	-9.52437		53.223	-11.0817
	26.9	-9.9341								53.787	-10.234		53.323	-12.949
	26.95	-9.95198								53.882	-10.3819		53.423	-13.7294
	27	-9.72845								53.989	-10.2248		53.526	-12.9799
	27.05	-9.57348								54.102	-10.7473		53.623	-11.7537
	27.1	-9.51129								54.188	-10.6921		53.728	-10.1451
	27.15	-10.0332								54.291	-11.182		53.824	-10.3541
	27.2	-9.55063								54.386	-10.935		53.925	-11.2294
	27.25	-9.42894								54.483	-10.4233		54.025	-12.9223
	27.3	-9.74334								54.587	-10.1815		54.125	-13.4152
	27.35	-9.82653								54.683	-11.5649		54.224	-13.0851
	27.4	-10.0562								54.787	-10.5679		54.324	-11.6144
	27.45	-9.72444								54.881	-10.6493		54.427	-11.624
	27.5	-8.94146								54.988	-8.90896		54.524	-10.7764
	27.55	-9.6222								55.087	-8.45703		54.624	-10.8358
	27.6	-9.32217								55.186	-6.82771		54.726	-10.9084
	27.65	-9.10422								55.288	-7.54575		54.824	-11.2449
	27.7	-10.3626								55.386	-7.74206		54.925	-11.3956
	27.75	-11.0784								55.481	-8.4069		55.026	-12.6141
	27.8	-11.1828								55.587	-8.34289		55.125	-12.6418
	27.85	-10.7253								55.682	-9.2358		55.224	-11.5913
	27.9	-10.3721								55.792	-9.27382		55.325	-12.972
	27.95	-10.1944								55.887	-11.2803		55.425	-12.422
	28	-9.61073								55.99	-11.307		55.527	-11.3861
	28.05	-10.167								56.087	-10.9229		55.625	-10.9507
	28.1	-11.3723								56.182	-10.1897		55.725	-11.3203
	28.15	-12.0225								56.285	-9.61348		55.825	-11.5054
	28.2	-11.9463								56.382	-9.62566		55.925	-13.5977
	28.25	-12.4999								56.486	-11.1987		56.025	-12.4552
	28.3	-11.3304								56.582	-11.0238		56.126	-11.481
	28.35	-10.4556								56.688	-10.1044		56.225	-10.1416
	28.4	-10.6608								56.783	-9.70881		56.325	-9.69252
	28.45	-10.238								56.887	-8.46718		56.425	-10.0314
	28.5	-9.54452								56.982	-8.40381		56.525	-11.012
	28.55	-9.81706								57.089	-9.6599		56.626	-11.0285
	28.6	-10.2635								57.184	-10.7705		56.726	-12.4643
	28.65	-10.9523								57.284	-11.682		56.827	-12.3003
	28.7	-10.0526								57.385	-12.0365		56.925	-11.4377
	28.75	-10.5021								57.488	-10.7148		57.022	-11.6782
	28.8	-10.8032								57.587	-9.84272		57.123	-12.4765
	28.85	-10.3563								57.687	-9.45588		57.223	-12.7698
	28.9	-9.86923								57.783	-9.39771		57.327	-12.8209
	28.95	-10.0847								57.887	-9.89624		57.426	-11.2267
	29	-10.5635								57.981	-8.87638		57.525	-9.15387
	29.05	-10.613								58.098	-8.24146		57.623	-9.57317
	29.1	-10.6213								58.188	-8.4625		57.726	-11.0842
	29.15	-10.9089								58.297	-9.41582		57.823	-12.2532
	29.2	-10.955								58.386	-9.74426		57.925	-13.3156
	29.25	-11.7893								58.487	-10.5905		58.026	-13.4463
	29.3	-12.5471								58.587	-11.0048
	29.35	-12.7595								58.684	-11.3906
	29.4	-11.8243								58.787	-11.2169
	29.45	-10.7884								58.885	-11.2885
	29.5	-9.81012								58.987	-9.69164
	29.55	-9.57348								59.086	-8.04142
	29.6	-9.72372								59.186	-7.48114
	29.65	-10.0305								59.289	-7.66678
	29.7	-10.7003								59.387	-8.27266
	29.75	-11.2883								59.484	-10.4247
	29.8	-10.5004								59.587	-11.0538
	29.85	-10.8277								59.694	-10.4473
	29.9	-10.8699								59.788	-9.76143
	29.95	-11.0499								59.89	-9.62674
	30	-11.0451								59.987	-9.90892
	30.05	-9.82615								60.082	-9.58333
	30.1	-10.0783								60.187	-9.95359
	30.15	-10.13								60.298	-9.73904
	30.2	-9.19046								60.388	-9.10533
	30.25	-9.32574								60.497	-8.81527
	30.3	-9.81995
	30.35	-9.35929
	30.4	-10.0428
	30.45	-9.49265
	30.5	-10.7037
	30.55	-11.3725
	30.6	-11.2459
	30.65	-11.3077
	30.7	-10.9203
	30.75	-10.0405
	30.8	-10.1793
	30.85	-9.6543
	30.9	-10.0474
	30.95	-10.2303
	31	-11.0683
	31.05	-11.3
	31.1	-11.6091
	31.15	-11.7594
	31.2	-11.5825
	31.25	-11.5027
	31.3	-10.2215
	31.35	-9.10664
	31.4	-9.30929
	31.45	-9.39232
	31.5	-9.99098
	31.55	-10.1596
	31.6	-10.2709
	31.65	-10.6828
	31.7	-10.3837
	31.75	-10.4263
	31.8	-10.8914
	31.85	-11.0928
	31.9	-11.0306
	31.95	-10.4721
	32	-10.1457
	32.05	-9.93023
	32.1	-9.92873
	32.15	-9.7487
	32.2	-9.71
	32.25	-9.03285
	32.3	-9.80309
	32.35	-10.0729
	32.4	-10.2011
	32.45	-9.96024
	32.5	-10.6022
	32.55	-10.1849
	32.6	-9.49205
	32.65	-9.18042
	32.7	-10.1919
	32.75	-10.7525
	32.8	-10.1353
	32.85	-10.1176
	32.9	-9.80868
	32.95	-9.2226
	33	-9.25434
	33.05	-9.08053
	33.1	-8.72648
	33.15	-9.52121
	33.2	-9.82774
	33.25	-10.5782
	33.3	-11.0559
	33.35	-11.9174
	33.4	-12.009
	33.45	-11.337
	33.5	-10.7908
	33.55	-10.4079
	33.6	-9.53998
	33.65	-9.837
	33.7	-10.433
	33.75	-10.2821
	33.8	-9.88718
	33.85	-10.4038
	33.9	-10.6463
	33.95	-10.0916
	34	-9.4502
	34.05	-10.5771
	34.1	-11.3169
	34.15	-11.4051
	34.2	-11.2194
	34.25	-10.7428
	34.3	-10.5447
	34.35	-10.2712
	34.4	-10.1827
	34.45	-10.3359
	34.5	-11.2438
	34.55	-11.9209
	34.6	-11.8753
	34.65	-11.088
	34.7	-11.6716
	34.75	-11.0339
	34.8	-10.3475
	34.85	-9.44571
	34.9	-9.408
	34.95	-10.0704
	35	-9.96328
	35.05	-9.48583
	35.1	-10.0556
	35.15	-9.86691
	35.2	-9.79567
	35.25	-9.89198
	35.3	-9.88433
	35.35	-9.75811
	35.4	-10.2467
	35.45	-10.3747
	35.5	-10.9011
	35.55	-10.3168
	35.6	-10.0065
	35.65	-9.29544
	35.7	-8.21691
	35.75	-7.53473
	35.8	-8.97431
	35.85	-9.66118
	35.9	-10.2181
	35.95	-10.3053
	36	-11.3359
	36.05	-11.1703
	36.1	-10.7238
	36.15	-10.4679
	36.2	-10.4609
	36.25	-10.1358
	36.3	-10.4916
	36.35	-11.451
	36.4	-11.5246
	36.45	-11.4358
	36.5	-10.8641
	36.55	-10.162
	36.6	-9.53115
	36.65	-9.39553
	36.7	-9.85543

## Sheet: Ext Data Fig 2b
Gi3-FRET									ELISA
wt	T84	E175	F181	F188	A414	P415	N419		wt	T84	E175	F181	F188	A414	P415	N419
24.9181	5.81503	7.03213	4.65352	11.486	4.29474	7.82934	9.73088		100	51.5075	37.9397	83.6683	79.6482	54.7739	59.5477	65.8291
20.8906	6.20562	6.836	9.0575	10.9301	3.3298	6.38667	15.155		100	49.4432	32.294	74.833	67.4833	46.9933	51.2249	59.2428
13.1035	6.75736	6.35091	7.46857	9.64913	3.54923	4.58002	17.3336		100	46.7811	32.1888	66.0944	60.515	37.1245	43.133	53.2189
9.28605	7.23224	8.55977	9.94305	10.7988	3.72681	7.89854	12.0472		100	54.8077	33.6538	56.4103	65.7051	64.7436	45.5128	65.3846
14.2552	14.5846	5.46358	6.38357	13.5759	5.34933	5.4001	11.7783		100	59.4502	32.3024	55.6701	71.8213	56.3574	49.1409	63.5739
13.5694	8.78017	6.14601	2.93049	14.3453	3.94386	7.07571	20.8213		100	59.1549	33.4507	59.1549	75.3521	59.1549	53.169	65.1408
16.7691	6.12928	3.35976	6.62087	11.319	3.20631	13.6998	14.2156		100	71.5493	38.8732	53.5211	83.662	75.493	79.1549	72.1127
18.4035	6.18603	7.36476	8.16475	13.1374	6.14198	16.6322	18.2759		100	70.8333	33.3333	54.1667	85	73.6111	74.7222	69.7222
17.6927	6.78588	4.57028	14.9232	15.1632	3.73733	3.27303	9.46136		100	78.9625	32.853	55.9078	92.7954	77.5216	78.6744	72.0461
10.3273	4.01394	2.4884	14.9294	9.29331	4.20302	5.20493	12.3193		100	85.7447	37.234	42.5532	65.5319	45.1064	50.4255	67.0213
20.4221	14.5289	7.62225	19.8098	5.73795	2.01767	6.39333	9.49623		100	78.1818	39.7727	43.1818	70.9091	46.1364	48.8636	77.2727
16.5879	7.47034	8.23718	15.0329	11.664	0.746517	9.19292	10.9233		100	72.4605	37.9233	47.1783	69.0745	43.7923	51.2415	68.8488
15.5212	10.9057	9.51891	10.6205	12.5473	0.688152	9.73761	12.8593
14.9991	15.12	3.62579	17.7153	14.0374	5.88271	4.99792	17.8124
12.7869	8.81377	3.74858	5.70959	14.7107	5.75264	15.9674	7.49674
17.4986	5.33367	3.39377	9.55349	9.1667	6.38346	12.7231	9.92454
14.0106	5.96163	3.11649	12.425	9.32685	6.38346	6.22277	8.89973
12.2092	8.01052	6.03621	17.3907	16.2294	10.159	5.35073	19.6206
18.4805	5.70538	7.62995	12.2006	15.7366	6.20757	8.42619	8.3038
20.3616	6.89125	8.78443	9.38658	14.4031	2.74237	5.47237	13.008
15.9377	7.31719	7.17309	8.58633	12.2436	7.74628	17.1873	4.24635
11.3044	10.3758	4.63151	9.15412	12.7857	11.1177	15.2802	8.89824
9.90558	7.83981	5.118	14.53	11.4975	12.092	9.46431	8.27592
16.3048	10.1888	3.8027	10.0331	10.1707	9.40744	15.2875	10.339
22.3836	7.40864	3.88794	7.58338	9.60532	10.0865	8.15435	17.6717
16.7915	17.4658	9.41506	8.7741	9.85128	7.1045	4.60704	9.30937
14.0748	17.8923		4.00352	9.48945	8.97278	5.90857	13.0218
11.7679	11.3651		6.74283	11.0109	14.6101	19.6927	12.0358
13.9146	7.69565		8.81199	9.23491	6.23075	19.8211	12.9665
12.6918	14.9077		3.61003	11.8644	12.6497	7.19378	8.28437
12.097			9.79921	9.35607	11.5055
14.1179			6.30328	16.3623	9.35348
13.9286			5.09072	16.8488	6.0896
18.474			3.49525	11.5926	12.4853
10.1974			6.80588	4.50045	5.58611
15.0872			10.3185	10.2142	10.7067
21.849			7.04624	13.8586	4.77814
15.3334			10.077	14.7179	2.42127
19.0204			9.60983	13.9109	8.87325
21.5369				14.8672
18.176				9.13251
15.2365				7.91012
17.2166				10.7418
19.7253				4.29929
14.7385				18.9247
9.71378				5.05741
17.7742				8.65928
17.519				20.3372
17.0104				16.7558
10.7078				10.4272
9.30425				7.63685
12.9156				8.58502
10.3105
11.859
7.83787
10.9272
18.2588
11.351
16.4519
12.4196
10.385
11.8871
10.9659
12.6559
11.2668
7.77977
8.62447
12.5311
9.85172
11.7158
9.47166
12.9788
8.95216
9.68547
6.51805
10.6108
11.3611
12.0733
8.00326
10.6925
11.0854
12.5423
12.2074
13.4478
12.1108
13.6109
6.83253
7.65365
14.9041

## Sheet: Ext Data Fig 2c
Tau (s)									ANOVA
wt	T84	E175	F181	F188	A414	P415	N419		Dunnett's multiple comparisons test	Mean diff.	95.00% CI of diff.	Below threshold?	Summary	Adjusted P Value	B-?
3.979	4.208	4.715	3.57	1.133	4.735	2.165	4.848		wt vs. 84	1.236	-0.1023 to 2.573	No	ns	0.0865	C	84
3.54	3.335	4.173	3.742	1.414	5.67	1.219	2.208		wt vs. 175	1.381	-0.03166 to 2.794	No	ns	0.059	D	175
4.4	3.817	1.561	3.648	2.046	2.97	1.213	1.905		wt vs. 181	-0.5508	-1.768 to 0.6662	No	ns	0.7955	E	181
5.213	3.304	3.125	2.277	1.122	8.442	1.973	6.355		wt vs. 188	-1.066	-2.173 to 0.03978	No	ns	0.0651	F	188
5.124	5.129	2.864	2.093	1.368	6.99	2.846	4.316		wt vs. 414	0.3946	-0.8224 to 1.612	No	ns	0.954	G	414
3.952	3.864	1.595	2.562	1.313	6.863	2.995	8.321		wt vs. 415	-0.03585	-1.374 to 1.302	No	ns	>0.9999	H	415
2.81	3.14	2.898	2.837	1.518	7.598	2.554	4.382		wt vs. 419	-0.8553	-2.193 to 0.4826	No	ns	0.4326	I	419
1.617	4.474	4.744	3.495	4.477	8.862	2.281	12.11
5.552	2.66	3.079	1.225	3.741	5.805	3.465	5.436		Test details	Mean 1	Mean 2	Mean diff.	SE of diff.	n1	n2	q	DF
7.969	2.443	2.775	1.748	7.808	5.745	2.318	8.719		wt vs. 84	4.971	3.735	1.236	0.4994	89	30	2.474	327
3.526	4.606	3.894	1.389	9.288	3.989	2.434	7.995		wt vs. 175	4.971	3.59	1.381	0.5274	89	26	2.619	327
3.164	3.593	4.657	1.65	4.925	1.759	2.694	3.113		wt vs. 181	4.971	5.522	-0.5508	0.4543	89	39	1.212	327
3.934	3.173	3.512	6.933	6.674	1.177	2.553	3.566		wt vs. 188	4.971	6.037	-1.066	0.4129	89	52	2.582	327
8.377	4.542	5.444	4.645	10.53	5.444	2.332	5.091		wt vs. 414	4.971	4.576	0.3946	0.4543	89	39	0.8686	327
6.221	4.007	3.731	2.142	7.183	4.616	8.001	6.272		wt vs. 415	4.971	5.007	-0.03585	0.4994	89	30	0.07178	327
3.807	4.046	2.485	6.164	5.981	4.89	7.798	4.848		wt vs. 419	4.971	5.826	-0.8553	0.4994	89	30	1.712	327
2.066	1.015	3.468	2.366	5.858	4.89	7.216	3.778
2.361	1.699	5.05	4.896	7.652	3.467	9.544	10.44		ANOVA summary
1.907	4.894	5.309	4.718	4.581	7.313	11.4	5.235		F	4.945
2.712	2.997	3.123	4.777	5.377	3.634	7.825	4.07		P value	<0.0001
4.091	2.933	4.14	6.542	9.35	3.834	8.516	3.068		P value summary	****
4.012	2.7	2.756	3.253	10.75	4.174	5.831	6.78		Significant diff. among means (P < 0.05)?	Yes
3.309	1.45	2.005	3.734	5.945	2.693	7.663	7.996		R squared	0.09572
3.228	1.87	4.456	11.49	2.871	2.568	8.854	7.156
3.465	1.432	2.803	8.76	6.065	1.902	3.162	4.74		Brown-Forsythe test
4.135	6.741	4.974	11.32	6.839	0.9551	3.499	7.806		F (DFn, DFd)	6.254 (7, 327)
4.099	4.556		6.535	8.482	3.711	6.761	6.314		P value	<0.0001
4.229	5.587		3.004	7.39	2.933	7.775	7.381		P value summary	****
2.452	5.935		8.814	2.449	5.134	5.734	5.776		Are SDs significantly different (P < 0.05)?	Yes
1.86	7.912		5.445	3.005	2.779	7.583	4.762
1.97			8.927	3.13	4.898				Bartlett's test
2.032			10.13	6.507	4.663				Bartlett's statistic (corrected)	44.74
3.624			11.74	4.772	3.572				P value	<0.0001
3.398			6.746	6.954	1.851				P value summary	****
3.892			8.434	7.835	4.273				Are SDs significantly different (P < 0.05)?	Yes
6.129			10.06	5.898	2.403
8.29			9.139	7.916	6.156				ANOVA table	SS	DF	MS	F (DFn, DFd)	P value
3.376			5.609	8.163	7.738				Treatment (between columns)	193.7	7	27.67	F (7, 327) = 4.945	P<0.0001
0.5718			8.79	6.076	7.381				Residual (within columns)	1830	327	5.597
1.345				7.043					Total	2024	334
8.399				8.712
5.164				7.197					Data summary
8.721				7.975					Number of treatments (columns)	8
4.358				2.758					Number of values (total)	335
5.799				7.589
7.908				11.63
6.38				8.252
2.597				4.655
7.3				7.587
5.922				4.457
8.328				11.52
5.795				10.18
7.554
5.036
8.409
4.752
8.388
6.352
6.869
5.611
6.793
4.83
5.264
8.364
4.694
4.829
4.836
4.041
3.745
3.399
4.574
4.828
2.02
5.432
5.392
8.627
7.024
4.381
4.939
3.816
3.506
7.104
6.199
7.998
6.19
6.319
6.04
7.485
8.365

## Sheet: Ext Data Fig 2c - Statistics
Number of families			1
Number of comparisons per family			15
Alpha			0.05
Tukey's multiple comparisons test			Mean diff.	95.00% CI of diff.	Below threshold?	Summary	Adjusted P Value
84 vs. 175			3.203	0.4328 to 5.974	Yes	*	0.0132	B-C
84 vs. 181			-0.2436	-2.754 to 2.267	No	ns	0.9998	B-D
84 vs. 188			-2.525	-4.896 to -0.1548	Yes	*	0.0294	B-E
84 vs. 414			2.45	-0.06135 to 4.960	No	ns	0.0604	B-F
84 vs. 419			-3.028	-5.698 to -0.3585	Yes	*	0.0161	B-H
175 vs. 181			-3.447	-6.065 to -0.8290	Yes	**	0.0027	C-D
175 vs. 188			-5.728	-8.212 to -3.245	Yes	****	<0.0001	C-E
175 vs. 414			-0.7537	-3.371 to 1.864	No	ns	0.962	C-F
175 vs. 419			-6.231	-9.002 to -3.461	Yes	****	<0.0001	C-H
181 vs. 188			-2.282	-4.472 to -0.09152	Yes	*	0.0357	D-E
181 vs. 414			2.693	0.3517 to 5.035	Yes	*	0.0139	D-F
181 vs. 419			-2.785	-5.295 to -0.2737	Yes	*	0.0201	D-H
188 vs. 414			4.975	2.785 to 7.165	Yes	****	<0.0001	E-F
188 vs. 419			-0.5028	-2.873 to 1.868	No	ns	0.9902	E-H
414 vs. 419			-5.478	-7.989 to -2.967	Yes	****	<0.0001	F-H
Test details			Mean 1	Mean 2	Mean diff.	SE of diff.	n1	n2	q	DF
84 vs. 175			9.123	5.92	3.203	0.9632	30	26	4.703	210
84 vs. 181			9.123	9.367	-0.2436	0.873	30	39	0.3946	210
84 vs. 188			9.123	11.65	-2.525	0.8242	30	52	4.333	210
84 vs. 414			9.123	6.673	2.45	0.873	30	39	3.968	210
84 vs. 419			9.123	12.15	-3.028	0.9282	30	30	4.614	210
175 vs. 181			5.92	9.367	-3.447	0.9101	26	39	5.356	210
175 vs. 188			5.92	11.65	-5.728	0.8634	26	52	9.383	210
175 vs. 414			5.92	6.673	-0.7537	0.9101	26	39	1.171	210
175 vs. 419			5.92	12.15	-6.231	0.9632	26	30	9.149	210
181 vs. 188			9.367	11.65	-2.282	0.7615	39	52	4.238	210
181 vs. 414			9.367	6.673	2.693	0.8141	39	39	4.679	210
181 vs. 419			9.367	12.15	-2.785	0.873	39	30	4.511	210
188 vs. 414			11.65	6.673	4.975	0.7615	52	39	9.239	210
188 vs. 419			11.65	12.15	-0.5028	0.8242	52	30	0.8628	210
414 vs. 419			6.673	12.15	-5.478	0.873	39	30	8.874	210
Compact letter display
419			A
188			A
181			B
84			B C
414			C D
175			D

## Sheet: Ext Data Fig 2e
	Time (s)	T84		Time (s)	E175		Time (s)	F181		Time (s)	F188		Time (s)	A414		Time (s)	P415		Time (s)	N419
	0	0.348364		0	-0.96355		0	0.953825		0	1.44039		0	-0.708577		0	-0.4604		0	0.920581
	0.1	-0.0977458		0.1	0.467603		0.1	0.543049		0.1	0.797572		0.1	-0.32355		0.1	-0.100281		0.1	0.460108
	0.2	-0.188006		0.2	1.36651		0.2	0.143232		0.2	0.0988914		0.2	0.134115		0.2	0.0538668		0.2	0.0586104
	0.3	-0.366626		0.3	1.7506		0.3	-0.35842		0.3	-0.450258		0.3	0.836513		0.3	-0.692322		0.3	-0.141141
	0.4			0.4	1.03948		0.4	-0.184803		0.4	-0.405954		0.4	0.912287		0.4	0.212379		0.4	-0.255147
	0.5	0.385302		0.5	1.06658		0.5	-0.19798		0.5	0.0909441		0.5	0.0570133		0.5	0.964951		0.5	-0.222215
	0.6	-0.0491776		0.6	0.658945		0.6	-0.0850531		0.6	-0.0390076		0.6	0.507122		0.6	0.465468		0.6	-0.293538
	0.7	-0.257128		0.7	-0.139526		0.7	-0.202471		0.7	-0.0297595		0.7	-0.104706		0.7	-1.03052		0.7	-0.41185
	0.8	0.315961		0.8	0.286306		0.8	-0.362576		0.8	0.268262		0.8	-0.631703		0.8	0.354793		0.8	-0.0315761
	0.9	-0.0909433		0.9	1.59416		0.9	0.0142915		0.9	0.626373		0.9	-0.495472		0.9	0.833114		0.9	0.344696
	1	0.315303		1	1.9653		1	0.126728		1	0.460995		1	-0.0105091		1	0.198361		1	0.496838
	1.1	0.595228		1.1	1.2772		1.1	-0.277773		1.1	0.514294		1.1	0.297841		1.1	-1.22158		1.1	0.510158
	1.2	0.364748		1.2	0.488378		1.2	-0.224644		1.2	0.872648		1.2	0.317022		1.2	0.517422		1.2	0.390079
	1.3	0.190445		1.3	-0.158316		1.3	-0.516883		1.3	0.816827		1.3	0.503579		1.3	0.67247		1.3	-0.133203
	1.4	-0.0755098		1.4	0.395504		1.4	-0.281049		1.4	0.599182		1.4	1.30662		1.4	0.460517		1.4	-0.463617
	1.5			1.5	0.43787		1.5	-0.326927		1.5	0.237048		1.5	2.10389		1.5	-1.00164		1.5	-0.578673
	1.6	0.0162138		1.6	-0.0885693		1.6	-0.16285		1.6	0.315101		1.6	1.46769		1.6	0.422007		1.6	-0.54445
	1.7	0.170257		1.7	1.09345		1.7	0.369179		1.7	0.119021		1.7	0.86858		1.7	0.813056		1.7	-0.584209
	1.8	1.19926		1.8	0.422794		1.8	0.316713		1.8	-0.375574		1.8	0.501587		1.8	0.348601		1.8	-0.886987
	1.9	0.405783		1.9	0.926875		1.9	0.0420985		1.9	-0.0140214		1.9	-0.490584		1.9	-0.933398		1.9	-0.586223
	2	0.433724		2	1.15254		2	-0.343749		2	0.517387		2	-1.50915		2	0.77729		2	-0.019422
	2.1	-0.23972		2.1	0.352285		2.1	-0.229821		2.1	0.749655		2.1	-1.5942		2.1	0.897166		2.1	0.181061
	2.2	-0.250106		2.2	0.629041		2.2	-0.375099		2.2	0.972098		2.2	-2.69514		2.2	0.864913		2.2	0.384723
	2.3	0.443745		2.3	1.43892		2.3	-0.220772		2.3	0.900395		2.3	-2.12143		2.3	-0.241511		2.3	0.451362
	2.4	0.685927		2.4	1.41805		2.4	-0.206419		2.4	0.552646		2.4	-2.27469		2.4	-0.766142		2.4	0.19411
	2.5	0.255909		2.5	1.15408		2.5	0.158183		2.5	0.184799		2.5	-1.84472		2.5	-0.0621079		2.5	-0.208286
	2.6			2.6	0.0626557		2.6	-0.0398101		2.6	-0.349283		2.6	-1.1823		2.6	0.161108		2.6	-0.655566
	2.7			2.7	-0.123122		2.7	-0.27805		2.7	-0.268763		2.7	-0.035435		2.7	-0.787898		2.7	-0.545895
	2.8	0.59947		2.8	0.392039		2.8	-0.517892		2.8	-0.183202		2.8	0.331938		2.8	-0.333539		2.8	-0.523477
	2.9	0.403881		2.9	0.231463		2.9	-0.325778		2.9	-0.441546		2.9	0.82975		2.9	0.60879		2.9	-0.714036
	3	0.403515		3	-0.523416		3	0.0170071		3	0.0815566		3	-0.875048		3	0.805625		3	-0.373631
	3.1	0.604663		3.1	-0.237151		3.1	0.3905		3.1	0.70062		3.1	-0.57712		3.1	0.477506		3.1	-0.197713
	3.2	0.304258		3.2	0.794748		3.2	-0.0356688		3.2	0.510628		3.2	-0.348998		3.2	-1.00216		3.2	0.0754154
	3.3	0.681319		3.3	1.24153		3.3	-0.195963		3.3	0.483499		3.3	-0.194207		3.3	0.551173		3.3	0.143988
	3.4	0.115032		3.4	0.799904		3.4	-0.54237		3.4	0.494763		3.4	-1.4166		3.4	1.05041		3.4	0.0484055
	3.5	0.361091		3.5	-0.0390774		3.5	-0.691217		3.5	0.354941		3.5	-1.95861		3.5	0.306867		3.5	0.0391425
	3.6	0.631434		3.6	-0.350662		3.6	-0.43318		3.6	0.150905		3.6	-2.43344		3.6	-1.19258		3.6	-0.307723
	3.7	0.682635		3.7	0.455324		3.7	-0.251397		3.7	-0.2592		3.7	-2.29413		3.7	0.259739		3.7	-0.579818
	3.8			3.8	0.362688		3.8	0.0870804		3.8	0.243204		3.8	-2.51563		3.8	0.511011		3.8	-0.264486
	3.9	0.304404		3.9	-0.497002		3.9	0.0979297		3.9	0.407073		3.9	-1.77935		3.9	0.0436522		3.9	-0.170306
	4	0.55551		4	-0.321388		4	-0.158854		4	-0.0213782		4	-0.650963		4	-1.16733		4	-0.220614
	4.1	0.340099		4.1	0.478014		4.1	-0.26464		4.1	0.383192		4.1	-0.42613		4.1	0.512319		4.1	0.126035
	4.2	0.613075		4.2	0.952525		4.2	-0.404243		4.2	1.07056		4.2	-0.76893		4.2	0.951008		4.2	0.197116
	4.3	0.32013		4.3	0.389569		4.3	-0.120333		4.3	1.31021		4.3	-0.757354		4.3	0.660135		4.3	0.139963
	4.4	0.545196		4.4	-0.639963		4.4	-0.0545166		4.4	1.28818		4.4	0.251155		4.4	-0.966681		4.4	-0.0795285
	4.5	-0.272562		4.5	-0.257032		4.5	0.266412		4.5	1.13225		4.5	-0.0843644		4.5	0.688596		4.5	0.0251395
	4.6	0.451718		4.6	0.365599		4.6	0.136727		4.6	0.999779		4.6	0.0958594		4.6	0.702357		4.6	-0.012362
	4.7	0.674736		4.7	0.249061		4.7	0.0841518		4.7	0.288096		4.7	-1.89266		4.7	0.207444		4.7	0.00936262
	4.8	0.3706		4.8	-0.131258		4.8	0.243783		4.8	-0.232917		4.8	-1.38938		4.8	-1.03779		4.8	-0.209076
	4.9			4.9	0.587231		4.9	0.190646		4.9	-0.310407		4.9	-1.16887		4.9	0.466971		4.9	0.137697
	5	0.531153		5	-0.33048		5	-0.127128		5	-0.114866		5	-1.61554		5	0.725356		5	0.0907937
	5.1	0.198564		5.1	0.099913		5.1	0.209315		5.1	-0.354487		5.1	-1.68147		5.1	0.550092		5.1	-0.444431
	5.2	0.600274		5.2	0.485404		5.2	0.096986		5.2	-0.078456		5.2	-1.68216		5.2	-1.0669		5.2	-0.023562
	5.3	-0.141998		5.3	-0.194091		5.3	0.326961		5.3	0.341756		5.3	-1.82539		5.3	0.345433		5.3	0.268204
	5.4	0.168501		5.4	0.165943		5.4	0.3625		5.4	0.595252		5.4	-1.51578		5.4	0.296258		5.4	0.536324
	5.5			5.5	1.27592		5.5	0.077006		5.5	0.349106		5.5	-2.37731		5.5	0.333291		5.5	0.79903
	5.6			5.6	1.89232		5.6	-0.105597		5.6	0.385654		5.6	-2.28951		5.6	-1.13918		5.6	0.692995
	5.7	0.348364		5.7	1.05583		5.7	-0.551953		5.7	0.155309		5.7	-2.39566		5.7	0.559128		5.7	0.581284
	5.8	-0.0977458		5.8	0.1123		5.8	-0.643657		5.8	-0.0662207		5.8	-1.51419		5.8	0.772478		5.8	0.31736
	5.9	-0.188006		5.9	0.23681		5.9	-0.178828		5.9	-0.31001		5.9	-2.0726		5.9	0.673384		5.9	-0.226999
	6	-0.366626		6	0.748887		6	-0.152343		6	0.0426158		6	-2.1373		6	-0.79181		6	0.0806945
	6.1			6.1	0.633228		6.1	-0.108883		6.1	0.182953		6.1	-1.25817		6.1	0.591495		6.1	-0.142784
	6.2	0.385302		6.2	-0.0771682		6.2	0.325157		6.2	-0.131276		6.2	-1.50536		6.2	0.779206		6.2	-0.310604
	6.3	-0.0491776		6.3	0.109569		6.3	0.514184		6.3	0.00301253		6.3	-1.09858		6.3	0.59994		6.3	-0.00941984
	6.4	-0.257128		6.4	0.787378		6.4	0.456228		6.4	0.509786		6.4	-0.69048		6.4	-0.536737		6.4	0.359897
	6.5	0.315961		6.5	0.731839		6.5	0.167182		6.5	0.786202		6.5	-0.613082		6.5	-0.663733		6.5	0.593276
	6.6	-0.0909433		6.6	0.356382		6.6	0.0639611		6.6	0.756888		6.6	0.381174		6.6	-0.149789		6.6	0.710229
	6.7	0.315303		6.7	-0.767456		6.7	-0.262761		6.7	0.727926		6.7	0.293217		6.7	0.0633284		6.7	0.544213
	6.8	0.595228		6.8	-1.13251		6.8	-0.55197		6.8	0.682125		6.8	0.122002		6.8	-0.922835		6.8	0.431147
	6.9	0.364748		6.9	-0.127825		6.9	-1.03135		6.9	0.288671		6.9	-0.537172		6.9	-0.597876		6.9	0.133548
	7	0.190445		7	-0.0162126		7	-1.19181		7	-0.371282		7	-0.671145		7	0.568261		7	-0.177136
	7.1	-0.0755098		7.1	-0.118034		7.1	-0.899323		7.1	-0.396062		7.1	-1.24289		7.1	0.638135		7.1	-0.123499
	7.2			7.2	0.802625		7.2	-0.347195		7.2	-0.575846		7.2	-2.43552		7.2	0.409098		7.2	-0.0237321
	7.3	0.0162138		7.3	0.199717		7.3	0.0931114		7.3	-1.00214		7.3	-2.18245		7.3	-0.938314		7.3	-0.406298
	7.4	0.170257		7.4	0.973808		7.4	0.0326252		7.4	-0.748555		7.4	-1.53947		7.4	0.479743		7.4	-0.11747
	7.5	1.19926		7.5	1.02292		7.5	-0.160229		7.5	-0.40366		7.5	-0.773823		7.5	0.971301		7.5	-0.0254192
	7.6	0.405783		7.6	0.200705		7.6	-0.222648		7.6	0.027484		7.6	-0.257247		7.6	0.489754		7.6	0.225159
	7.7	0.433724		7.7	0.31079		7.7	-0.609495		7.7	0.187985		7.7	-1.11507		7.7	-0.900737		7.7	0.507289
	7.8	-0.23972		7.8	1.3398		7.8	-0.877151		7.8	0.4366		7.8	0.401871		7.8	0.917946		7.8	0.564141
	7.9	-0.250106		7.9	1.69256		7.9	-0.684607		7.9	0.57496		7.9	0.708645		7.9	0.89621		7.9	0.36597
	8	0.443745		8	1.04206		8	-0.245988		8	0.540292		8	0.823321		8	0.457136		8	-0.0945023
	8.1	0.685927		8.1	-0.0377595		8.1	-0.093366		8.1	0.122142		8.1	-0.0752643		8.1	-0.970735		8.1	-0.554563
	8.2	0.255909		8.2	-0.0219838		8.2	0.0684337		8.2	0.474931		8.2	-0.676702		8.2	0.316624		8.2	-0.393315
	8.3			8.3	0.220601		8.3	0.0265022		8.3	0.367973		8.3	-0.480146		8.3	0.614084		8.3	-0.402119
	8.4			8.4	0.182202		8.4	-0.0462655		8.4	-0.103567		8.4	-0.471965		8.4	0.5716		8.4	-0.527225
	8.5	0.59947		8.5	-0.215406		8.5	-0.127911		8.5	0.313053		8.5	-0.614613		8.5	-1.03823		8.5	0.150067
	8.6	0.403881		8.6	-0.14252		8.6	-0.675002		8.6	0.611928		8.6	-1.23727		8.6	0.565522		8.6	0.374774
	8.7	0.403515		8.7	1.05086		8.7	-0.655131		8.7	0.916047		8.7	-0.587356		8.7	0.605871		8.7	0.695412
	8.8	0.604663		8.8	1.30987		8.8	-0.624604		8.8	0.94597		8.8	0.129125		8.8	0.294122		8.8	0.374091
	8.9	0.304258		8.9	0.358478		8.9	-0.418117		8.9	0.70575		8.9	0.211888		8.9	-0.955599		8.9	0.413114
	9	0.681319		9	-0.475029		9	-0.178278		9	0.526798		9	-0.397925		9	0.584653		9	0.0228068
	9.1	0.115032		9.1	-1.01998		9.1	-0.641703		9.1	-0.0433227		9.1	0.0795749		9.1	0.731022		9.1	-0.445371
	9.2	0.361091		9.2	-0.235224		9.2	-0.80283		9.2	-0.632221		9.2	0.571089		9.2	0.879427		9.2	-1.14108
	9.3	0.631434		9.3	-0.0460274		9.3	-0.739182		9.3	-0.0801855		9.3	0.485118		9.3	-0.408049		9.3	-0.71203
	9.4	0.682635		9.4	-0.904985		9.4	-0.798455		9.4	-0.0532957		9.4	0.214207		9.4	0.343052		9.4	-0.905853
	9.5			9.5	-0.0765773		9.5	-0.673716		9.5	-0.241863		9.5	0.370992		9.5	0.488062		9.5	-1.13444
	9.6	0.304404		9.6	0.7067		9.6	-0.269024		9.6	0.190012		9.6	1.25169		9.6	0.534713		9.6	-0.62313
	9.7	0.55551		9.7	0.603717		9.7	0.0841246		9.7	0.890932		9.7	0.964029		9.7	-0.934732		9.7	-0.0885
	9.8	0.340099		9.8	0.709151		9.8	-0.333687		9.8	1.15362		9.8	0.128608		9.8	0.778999		9.8	-0.0142899
	9.9	0.613075		9.9	-0.794577		9.9	-0.638493		9.9	1.13272		9.9	0.683679		9.9	1.10167		9.9	0.116161
	10	0.32013		10	-0.932212		10	-0.620613		10	0.980495		10	0.914948		10	1.09292		10	0.151302
	10.1	0.545196		10.1	-0.261499		10.1	-0.708868		10.1	0.820262		10.1	0.211201		10.1	-0.396985		10.1	0.133289
	10.2	-0.272562		10.2	-0.040394		10.2	-0.749151		10.2	0.0847393		10.2	-0.623622		10.2	0.457804		10.2	-0.290246
	10.3	0.451718		10.3	-0.0166731		10.3	-0.887842		10.3	-0.392419		10.3	0.519042		10.3	0.889637		10.3	-0.844659
	10.4	0.674736		10.4	0.854848		10.4	-0.475364		10.4	0.0138245		10.4	-0.133101		10.4	0.724132		10.4	-0.634391
	10.5	0.3706		10.5	0.455078		10.5	-0.503324		10.5	0.0424245		10.5	0.388493		10.5	-0.150712		10.5	-0.798718
	10.6			10.6	1.01855		10.6	-0.53866		10.6	-0.404131		10.6	0.33947		10.6	-0.470526		10.6	-1.28121
	10.7	0.531153		10.7	0.323501		10.7	-0.0909892		10.7	-0.197172		10.7	-0.0368111		10.7	0.188677		10.7	-1.01045
	10.8	0.198564		10.8	-0.299048		10.8	-0.238316		10.8	0.639682		10.8	0.114105		10.8	0.501872		10.8	-0.145361
	10.9	0.600274		10.9	-0.360078		10.9	-0.389001		10.9	1.06534		10.9	0.10051		10.9	-0.466915		10.9	0.607353
	11	-0.141998		11	0.724906		11	-0.203857		11	1.25359		11	-0.167834		11	-0.0188815		11	0.999961
	11.1	0.168501		11.1	1.24211		11.1	-0.305643		11.1	1.62514		11.1	-0.714529		11.1	1.10927		11.1	0.873881
	11.2			11.2	0.395528		11.2	-0.136688		11.2	1.38844		11.2	-1.29941		11.2	1.30365		11.2	0.524295
	11.3			11.3	-0.564418		11.3	-0.440543		11.3	0.649002		11.3	-1.14032		11.3	1.05149		11.3	0.190664
	11.4	0.613075		11.4	-0.826021		11.4	-0.0143274		11.4	-0.477931		11.4	-0.328259		11.4	-0.479948		11.4	-0.598695
	11.5	0.32013		11.5	-0.233045		11.5	0.613846		11.5	-0.492218		11.5	-1.19976		11.5	1.33577		11.5	-0.710152
	11.6	0.545196		11.6	0.258403		11.6	0.0952131		11.6	-0.0210876		11.6	-1.78814		11.6	1.71097		11.6	-0.412446
	11.7	-0.272562		11.7	-0.506428		11.7	-0.0205556		11.7	-0.127098		11.7	-1.52613		11.7	0.914885		11.7	-0.146758
	11.8	0.451718		11.8	0.665729		11.8	0.002834		11.8	-0.260524		11.8	-1.31921		11.8	-0.575886		11.8	-0.671101
	11.9	0.674736		11.9	-0.0297975		11.9	-0.461766		11.9	0.385499		11.9	-0.97186		11.9	0.890364		11.9	-0.517953
	12	0.3706		12	0.0753776		12	-0.441819		12	0.833396		12	-1.53074		12	1.01693		12	-0.198583
	12.1			12.1	0.322735		12.1	-0.949429		12.1	0.990943		12.1	-2.02771		12.1	0.568848		12.1	0.0984486
	12.2	0.531153		12.2	-0.232777		12.2	-0.703977		12.2	0.845571		12.2	-1.55498		12.2	-0.599017		12.2	0.147845
	12.3	0.198564		12.3	0.272468		12.3	-0.139961		12.3	1.06954		12.3	-1.26153		12.3	1.0596		12.3	0.0384422
	12.4	0.600274		12.4	1.41118		12.4	-0.578428		12.4	0.783516		12.4	-0.545958		12.4	1.30949		12.4	-0.216853
	12.5	-0.141998		12.5	1.2441		12.5	-0.743815		12.5	0.330217		12.5	-0.26877		12.5	1.16659		12.5	-0.423444
	12.6	0.168501		12.6	1.18168		12.6	-0.729989		12.6	-0.33656		12.6	0.548335		12.6	-0.519809		12.6	-0.891249
	12.7			12.7	0.0680713		12.7	-0.668136		12.7	-0.13692		12.7	0.272959		12.7	1.02963		12.7	-0.581824
	12.8			12.8	-0.362172		12.8	-0.670936		12.8	-0.0163465		12.8	0.345742		12.8	1.35398		12.8	-0.542526
	12.9	0.348364		12.9	0.333682		12.9	-0.750846		12.9	-0.319254		12.9	-0.500396		12.9	0.60613		12.9	-0.79392
	13	-0.0977458		13	0.0979551		13	-0.716937		13	0.350154		13	-0.119181		13	-0.631684		13	-0.494716
	13.1	-0.188006		13.1	-0.781516		13.1	-0.500505		13.1	0.671496		13.1	-0.369976		13.1	0.7486		13.1	-0.294469
	13.2	-0.366626		13.2	-0.749735		13.2	-0.381925		13.2	0.80352		13.2	-1.37664		13.2	0.843165		13.2	-0.0521375
	13.3			13.3	-0.0204464		13.3	-0.416792		13.3	0.823377		13.3	-1.81081		13.3	0.447744		13.3	0.196428
	13.4	0.385302		13.4	0.379268		13.4	-0.200134		13.4	0.798086		13.4	-2.14158		13.4	-1.07224		13.4	0.278335
	13.5	-0.0491776		13.5	-0.164308		13.5	0.0198239		13.5	0.7609		13.5	-0.937583		13.5	0.759799		13.5	0.323887
	13.6	-0.257128		13.6	-1.11601		13.6	-0.0225895		13.6	0.667282		13.6	0.0491549		13.6	1.15099		13.6	0.205575
	13.7	0.315961		13.7	-1.37899		13.7	-0.368357		13.7	0.198254		13.7	-0.7825		13.7	0.935177		13.7	-0.191246
	13.8	-0.0909433		13.8	-0.466118		13.8	-0.701971		13.8	0.907606		13.8	-0.915688		13.8	-0.291046		13.8	0.18453
	13.9	0.315303		13.9	-0.18045		13.9	-0.639952		13.9	0.522224		13.9	-0.411118		13.9	1.18714		13.9	-0.180803
	14	0.595228		14	-0.306518		14	-0.857757		14	0.142892		14	-0.59939		14	1.23512		14	-0.815854
	14.1	0.364748		14.1	-0.139393		14.1	-0.830526		14.1	0.33171		14.1	-0.57343		14.1	0.589854		14.1	-0.597475
	14.2	0.190445		14.2	0.569864		14.2	-0.70214		14.2	0.560975		14.2	-0.557483		14.2	-0.720927		14.2	-0.528257
	14.3	-0.0755098		14.3	0.98151		14.3	-1.08981		14.3	0.825315		14.3	0.250412		14.3	0.890616		14.3	-0.225683
	14.4			14.4	0.286657		14.4	-1.21597		14.4	0.89855		14.4	0.554014		14.4	1.12731		14.4	0.144163
	14.5	0.0162138		14.5	-0.866523		14.5	-1.72605		14.5	0.743468		14.5	0.782711		14.5	1.05919		14.5	0.107236
	14.6	0.170257		14.6	-0.873374		14.6	-1.4469		14.6	0.512039		14.6	-0.130782		14.6	-0.448516		14.6	0.164073
	14.7	1.19926		14.7	-0.438623		14.7	-1.27914		14.7	-0.157574		14.7	0.617068		14.7	1.08661		14.7	-0.482241
	14.8	0.405783		14.8	-0.610847		14.8	-1.25917		14.8	-0.828024		14.8	0.913012		14.8	1.4598		14.8	-1.06737
	14.9	0.433724		14.9	-1.41774		14.9	-0.710258		14.9	-0.470635		14.9	0.189628		14.9	1.21048		14.9	-0.710469
	15	-0.23972		15	-0.616248		15	-0.500058		15	-0.588097		15	-0.814286		15	-0.606834		15	-0.816729
	15.1	-0.250106		15.1	-0.841726		15.1	-0.892569		15.1	-0.862778		15.1	-1.57942		15.1	1.0171		15.1	-1.24599
	15.2	0.443745		15.2	-0.277432		15.2	-0.735916		15.2	-0.106056		15.2	-1.19222		15.2	1.32087		15.2	-0.617215
	15.3	0.685927		15.3	0.00863218		15.3	-0.545223		15.3	0.243737		15.3	-0.490495		15.3	0.545263		15.3	-0.330589
	15.4	0.255909		15.4	-0.611752		15.4	-0.635195		15.4	0.0889324		15.4	-0.406703		15.4	-0.982621		15.4	-0.0579146
	15.5			15.5	-0.816226		15.5	-1.05588		15.5	0.170809		15.5	-0.767724		15.5	0.587831		15.5	-0.114099
	15.6			15.6	0.117398		15.6	-0.625459		15.6	0.070799		15.6	-0.424736		15.6	0.93134		15.6	-0.15701
	15.7	0.59947		15.7	0.698446		15.7	-0.267381		15.7	0.0503377		15.7	0.0432681		15.7	0.852437		15.7	-0.129186
	15.8	0.403881		15.8	0.479532		15.8	0.0287179		15.8	-0.315515		15.8	-0.0712426		15.8	-0.838304		15.8	-0.530802
	15.9	0.403515		15.9	-0.40547		16	-0.10244		15.9	-0.858626		15.9	0.0124832		15.9	1.06968		15.9	-1.19332
	16	0.604663		16	-0.623197		16.1	0.184053		16	-0.446835		16	-0.50139		16	1.37464		16	-0.780427
	16.1	0.304258		16.1	-0.142025		16.2	0.425743		16.1	-0.39448		16.1	-1.10214		16.1	0.693157		16.1	-0.612063
	16.2	0.681319		16.2	-0.257446		16.3	-0.201973		16.2	-1.16208		16.2	-2.0235		16.2	-0.0583876		16.2	-0.990475
	16.3	0.115032		16.3	-0.820425		16.4	-0.184803		16.3	-0.51346		16.3	-3.13929		16.3	-0.191536		16.3	-0.274136
	16.4	0.361091		16.4	0.297447		16.5	-0.19798		16.4	0.0336656		16.4	-2.92369		16.4	0.347787		16.4	0.31855
	16.5	0.631434		16.5	-0.183728		16.6	-0.0850531		16.5	0.267073		16.5	-1.98634		16.5	0.626366		16.5	0.703052
	16.6	0.682635		16.6	0.387699		16.7	-0.202471		16.6	0.436188		16.6	-2.04852		16.6	-0.0792758		16.6	0.519146
	16.7			16.7	0.382565		16.8	-0.362576		16.7	0.416647		16.7	-2.38576		16.7	0.143253		16.7	0.333252
	16.8	0.304404		16.8	-0.100332		16.9	0.0142915		16.8	0.275042		16.8	-1.2642		16.8	1.20239		16.8	-0.0443083
	16.9	0.55551		16.9	-0.350492		17	0.126728		16.9	0.0416399		16.9	-0.00763033		16.9	1.47033		16.9	-0.522062
				17	0.265949		17.1	-0.277773		17	-0.937098		17	1.1036		17	0.833334		17	-1.33314
				17.1	0.682994		17.2	-0.224644		17.1	-0.601763		17.1	1.14438		17.1	-0.494905		17.1	-0.681917
				17.2	0.299752		17.3	-0.516883		17.2	-0.835718		17.2	-0.589978		17.2	1.04292		17.2	-0.66213
				17.3	-0.683762		17.4	-0.281049		17.3	-1.28782		17.3	1.2051		17.3	1.185		17.3	-1.08367
				17.4	-1.03781		17.5	-0.326927		17.4	-0.672843		17.4	0.882711		17.4	0.863016		17.4	-0.511629
				17.5	-0.0588784		17.6	-0.16285		17.5	-0.109752		17.5	0.687447		17.5	-0.583803		17.5	0.0648532
				17.6	0.203058		17.7	0.369179		17.6	0.237097		17.6	0.820726		17.6	1.01525		17.6	0.0779568
				17.7	-1.04522		17.8	0.316713		17.7	0.0993317		17.7	1.1492		17.7	1.08859		17.7	0.13996
				17.8	-0.967131		17.9	0.0420985		17.8	-0.247754		17.8	1.08873		17.8	0.684918		17.8	0.0216699
				17.9	0.0817883		18	-0.343749		17.9	-0.562439		17.9	1.14138		17.9	-0.56474		17.9	-0.158685
				18	0.336155		18.1	-0.229821		18	-1.29877		18	2.05849		18	1.06597		18	-0.63199
				18.1	0.0292819		18.2	-0.24879		18.1	-1.68028		18.1	2.20558		18.1	1.37539		18.1	-1.18023
				18.2	-0.86962		18.3	-0.452721		18.2	-1.14805		18.2	2.85677		18.2	1.39875		18.2	-0.60413
				18.3	-0.842853		18.4	-0.168981		18.3	-1.00809		18.3	1.55293		18.3	-0.186404		18.3	-0.443224
				18.4	0.175		18.5	-0.216248		18.4	-1.217		18.4	0.149467		18.4	0.772441		18.4	-0.982438
				18.5	-0.0427389		18.7	-0.167584		18.5	-0.614907		18.5	0.571646		18.5	1.21706		18.5	-0.345206
				18.6	-0.565973		18.8	-0.230442		18.6	-0.0535359		18.6	-1.37334		18.6	0.985767		18.6	0.180672
				18.7	0.313881		18.9	-0.401833		18.7	0.14273		18.7	-1.89422		18.7	-0.507714		18.7	0.497421
				18.8	-0.82894		19	0.0478469		18.8	0.0322347		18.8	-2.13625		18.8	1.07407		18.8	0.700758
				18.9	-0.589172		19.1	0.126728		18.9	-0.0770475		18.9	-3.01673		18.9	1.62621		18.9	0.536911
				19	-0.80097		19.2	-0.277773		19	-0.188451		19	-3.26265		19	1.31249		19	0.476254
				19.1	-1.4631		19.3	-0.224644		19.1	-0.763892		19.1	-1.99162		19.1	0.300112		19.1	0.00298814
				19.2	-0.0472097		19.4	-0.516883		19.2	-1.20599		19.2	-0.487632		19.2	0.105372		19.2	-0.994141
				19.3	-0.864495		19.5	-0.281049		19.3	-0.677331		19.3	-0.411065		19.3	0.689615		19.3	-0.717233
				19.4	0.0510623		19.6	-0.326927		19.4	-0.643882		19.4	-0.104992		19.4	0.683256		19.4	-0.909012
				19.5	0.281324		19.7	-0.16285		19.5	-1.07703		19.5	-0.0248245		19.5	0.17704		19.5	-1.2428
				19.6	-0.491836		19.8	0.369179		19.6	-0.24317		19.6	0.325408		19.6	0.137823		19.6	-0.660992
				19.7	-0.422971		19.9	0.316713		19.7	0.259491		19.7	0.122496		19.7	1.28922		19.7	-0.299733
				19.8	0.510832		20	0.0420985		19.8	0.645456		19.8	-0.730013		19.8	1.39744		19.8	0.202697
				19.9	0.983892		20.1	-0.343749		19.9	0.539781		19.9	0.384302		19.9	0.912434		19.9	0.249009
				20	0.704649		20.2	-0.229821		20	0.404834		20	1.17071		20	-0.260562		20	0.177655
				20.1	-0.66926		20.3	-0.23883		20.1	-0.133774		20.1	0.80674		20.1	0.846381		20.1	0.126528
				20.2	-0.81808		20.4	-0.293085		20.2	-0.878852		20.2	-0.303528		20.2	1.34778		20.2	-0.28668
				20.3	-0.00888078		20.5	-0.374638		20.3	-1.41627		20.3	-0.421782		20.3	0.936905		20.3	-1.01381
				20.4	0.177679		20.6	-0.31768		20.4	-0.823567		20.4	-0.610817		20.4	-0.764854		20.4	-0.702382
				20.5	-0.553023					20.5	-0.694807		20.5	-1.49318		20.5	0.86309		20.5	-0.674503
				20.6	0.277861					20.6	-1.27754		20.6	-2.79686		20.6	0.986121		20.6	-1.09691
				20.7	-0.368375					20.7	-0.307976		20.7	-3.08047		20.7	0.243897		20.7	-0.448334
				20.8	-0.234193					20.8	0.229553		20.8	-2.41118		20.8	-0.852569		20.8	0.348144
				20.9	-0.746783					20.9	0.424518		20.9	-2.1735		20.9	0.750192		20.9	0.744185
				21	-1.30141					21	0.489839		21	-1.73683		21	0.739226		21	0.821961
				21.1	-0.721701					21.1	0.5484		21.1	-0.527489		21.1	0.362868		21.1	0.429705
				21.2	0.44974					21.2	0.35122		21.2	0.310358		21.2	-0.418826		21.2	0.309479
				21.3	0.62729					21.3	-0.266063		21.3	0.497811		21.3	0.332907		21.3	-0.04473
				21.4	0.588773					21.4	-1.45899		21.4	0.766933		21.4	0.241284		21.4	-0.695647
				21.5	-0.368013					21.5	-1.02595		21.5	0.569221					21.5	-0.248087
				21.6	-0.748043					21.6	-1.20724		21.6	0.211389					21.6	-0.276429
				21.7	-0.192931					21.7	-1.71654		21.7	0.507122					21.7	-0.56663
				21.8	0.0767678					21.8	-1.80408		21.8	-0.104706					21.8	-0.793272
				21.9	-0.283912					21.9	-0.241799		21.9	-0.631703					21.9	-0.882151
				22	0.318691					22	0.951061		22	-0.495472					22	-0.704564
				22.1	-0.837487					22.1	1.3166		22.1	-0.0105091					22.3	-0.576958
				22.2	-0.477611					22.2	1.39412		22.2	0.297841					22.4	-0.455871
				22.3	-0.65071					22.3	1.13638		22.3	0.317022					22.5	-0.397743
				22.4	-1.15934					22.4	0.253614		22.4	0.503579					22.6	-0.338814
				22.5	-0.860985					22.5	-1.20811		22.5	1.30662					22.7	-0.257039
				22.6	0.248198					22.6	-1.97461		22.6	2.10389					22.8	-0.189367
				22.7	0.690978					22.7	-1.2455		22.7	1.46769					22.9	-0.839805
				22.8	-0.0155933					22.8	-1.02681		22.8	0.609532					23	-0.120888
				22.9	-0.76845					22.9	-1.44624		22.9	0.69234					23.1	0.275279
				23	-0.895019					23	-0.243818		23	-0.987207					23.2	0.310537
				23.1	0.00823249					23.1	0.399871		23.1	-1.18241					23.3	0.384197
				23.2	0.135569					23.2	0.665577		23.2	-1.30404					23.4	0.453446
				23.3	-0.41766					23.3	0.472324		23.3	-0.598437					23.5	0.294319
				23.4	-0.401527					23.4	0.0578762		23.5	-0.943873					23.6	-0.0874457
				23.5	0.557185					23.5	-0.361476		23.6	-0.713589					23.7	-0.717621
				23.6	0.576829					23.6	-1.05486		23.7	-0.572417					23.8	0.121976
				23.7	0.520992					23.7	-1.94922		23.8	0.836625					23.9	0.32545
				23.8	-0.384578					23.8	-1.33862		23.9	1.18031
				23.9	-0.706967					23.9	-1.15676		24	0.0674388
				24	-0.323884					24	-1.41345		24.1	0.507122
				24.1	-0.285911					24.1	-0.352578		24.2	-0.104706
				24.2	-0.915172					24.2	0.418466		24.3	-0.631703
				24.3	-0.678243					24.3	0.919535		24.4	-0.495472
				24.4	-0.261151					24.4	0.918625		24.5	-0.0105091
				24.5	0.540903					24.5	0.910179		24.6	0.297841
				24.6	0.782409					24.6	0.48485		24.7	0.317022
				24.7	-0.503208					24.7	-0.375077		24.8	0.503579
				24.8	-0.519348					24.8	-1.25929		24.9	1.30662
				24.9	0.391738					24.9	-0.972909		25	2.10389
				25	0.519567					25	-1.13794		25.1	1.46769
				25.1	-0.421938					25.1	-1.83635		25.2	0.86858
				25.2	-0.293069					25.2	-0.84008		25.3	0.501587
				25.3	-0.645388					25.3	0.219457		25.4	-0.762957
				25.4	0.099102					25.4	0.623363		25.5	-1.18735
				25.5	0.1411					25.5	0.487175		25.6	-1.88487
				25.6	-0.0596199					25.6	0.644793		25.7	-2.29236
				25.7	0.226767					25.7	0.30764		25.8	-1.49654
				25.8	1.12086					25.8	-0.314937		25.9	-1.58667
				25.9	0.969406					25.9	-1.40345		26.1	-1.81776
				26	0.125092					26	-0.656582		26.2	-1.29436
				26.1	-0.707363					26.1	-0.574901		26.3	-0.224153
				26.2	-0.661203					26.2	-1.23984		26.4	0.348836
				26.3	0.463902					26.3	-0.354524		26.5	1.05949
				26.4	1.06038					26.4	0.314252		26.6	0.390794
				26.5	0.693848					26.5	0.785322		26.7	1.30662
				26.6	1.10554					26.6	0.788566		26.8	2.10389
				26.7	0.050004					26.7	0.392445		26.9	1.46769
				26.8	0.309088					26.8	-0.225798		27	0.86858
				26.9	-0.160202					26.9	-0.952488		27.1	0.501587
				27	-1.05729					27	-1.83819		27.2	-0.490584
				27.1	-0.682113					27.1	-1.37015		27.3	-1.50915
				27.2	0.809842					27.2	-1.64203		27.4	-2.26845
				27.3	1.12401					27.3	-2.30749		27.5	-1.92443
				27.4	0.623448					27.4	-1.11205		27.6	-1.82377
				27.5	-0.322414					27.5	-0.26274		27.7	-1.7119
				27.6	-0.652624					27.6	0.130668		27.8	-1.71648
				27.7	-0.448217					27.7	0.463866		27.9	-0.676157
				27.8	-0.36351					27.8	0.516556
				27.9	-0.835215					27.9	-0.0590493
				28	-0.413162					28	-0.7726
				28.1	0.581934					28.1	-1.74798
				28.2	1.30244					28.2	-0.922429
				28.3	0.917531					28.3	-0.871851
				28.4	0.31122					28.4	-1.38864
				28.5	0.203478					28.5	-0.475555
				28.6	0.587114					28.6	0.265975
				28.7	0.483075					28.7	0.682268
				28.8	-0.260949					28.8	0.68332
				28.9	0.076378					28.9	0.390524
				29	1.04149					29	0.0021756
				29.1	1.08384					29.1	-0.669497
				29.2	0.486954					29.2	-1.41154
				29.3	-1.28118					29.3	-0.915314
				29.4	-0.418626					29.4	-0.8567
				29.5	0.143849					29.5	-1.50422
				29.6	-0.0237865					29.6	-0.842469
				29.7	-0.491115					29.7	0.0032132
				29.8	-0.456421					29.8	0.338776
				29.9	0.566653					29.9	0.602616
				30	0.675509					30	0.812538
				30.1	0.121401					30.1	0.289685
				30.2	0.347555					30.2	-0.270577
				30.3	-0.00818218					30.3	-1.32709
				30.4	-0.835599					30.4	-0.646761
				30.5	-1.96365					30.5	-0.30771
										30.6	-1.28877
										30.7	-0.473228
										30.8	0.19831
										30.9	0.394339
										31	0.39188
										31.1	0.120953
										31.2	0.0356473
										31.3	-0.451693
										31.4	-1.51896
										31.5	-0.915775
										31.6	-0.904645
										31.7	-1.43242
										31.8	-0.801354
										31.9	-0.229981
										32	0.4452
										32.1	0.293358
										32.2	0.229085
										32.3	0.028291
										32.4	-0.542255
										32.5	-1.28999
										32.6	-0.673862
										32.7	-0.451764
										32.8	-1.01333
										32.9	-0.869038
										33	0.980319
										33.1	2.06158
										33.2	2.43552
										33.3	2.36843
										33.4	2.04697
										33.5	1.16765
										33.6	-0.526606
										33.7	-0.863843
										33.8	-0.32088
										33.9	-0.645167
										34	-1.68756
										34.1	-0.853243
										34.2	-0.154564
										34.3	0.510867
										34.4	0.928733
										34.5	1.12675
										34.6	1.00578
										34.7	0.452511
										34.8	-0.553763
										34.9	-0.00683208
										35	-0.0318239
										35.1	-0.092082
										35.2	-0.395472
										35.3	-0.673208
										35.4	-0.995082
