# Supplementary material for: Ligand-specific activation trajectories dictate GPCR signalling in cells
Source: Nature. 2026 Jan 14;650(8103):1053–62. doi: 10.1038/s41586-025-09963-3 (PMC12935549; doi:10.1038/s41586-025-09963-3)
Supplement: Supplementary file 14 — Source Data Extended Data Fig. 3 [file 41586_2025_9963_MOESM14_ESM.xlsx]

## Sheet: Ext Data Fig 3
a)	Time (s)	E175		Time (s)	F181		b)	T84-LY	T84-ACh		E175-LY	E175-ACh		F181-LY	F181-ACh		F188-LY	F188-ACh		A414-LY	A414-ACh		P415-LY	P415-ACh		P419-LY	P419-ACh		c)		LY2119620
	0	18.2934		0	17.029			-11.2589	18.2207		-9.18655	9.53295		-5.80624	-6.35094		-19.4228	-11.7072		-16.6559	-14.1723		-21.8049	-14.0095		-4.95697	-13.5132			T84	68.72
	0.1	18.805		0.1	16.7577			-10.4851	19.9411		-13.6967	17.8369		-6.41717	-4.35485		-21.0271	-12.4451		-14.8437	-10.8465		-17.685	-12.362		-4.81457	-12.8064			N419	64.31
	0.2	18.4489		0.2	17.0586			-9.69923	21.0229		-10.9951	18.0093		-4.86812	-6.02663		-12.6329	-6.1822		-12.4484	-10.2225		-16.9018	-11.0156		-4.25878	-11.5766			P415	158.9
	0.3	18.7408		0.3	17.092			-9.82681	16.917		-7.05901	9.53295		-6.26704	-6.52991		-13.1678	-8.63001		-9.40784	-7.35275		-16.0246	-10.2375		-22.7823	-28.567			A414	139.6
	0.4	18.4116		0.4	17.0101			-10.1767	16.6117		-8.57037	17.8369		-6.5802	-5.85229		-12.4444	-7.39681		-14.2682	-11.0095		-20.9734	-14.0518		-23.1401	-26.467			F188	190
	0.5	18.6637		0.5	16.9369			-7.8587	17.0428		-5.37834	8.0093		-5.98926	-5.64298		-13.6774	-8.67405		-16.788	-13.0783		-15.2545	-10.6905		-11.597	-11.0114			F181	134
	0.6	18.526		0.6	16.9545			-10.4993	15.914		-8.27186	9.91312		-5.69423	-5.57923		-14.7885	-10.6335		-15.6437	-13.8804		-16.8548	-12.2287		-6.78941	-9.18354			E175	74.6
	0.7	18.8506		0.7	17.1621			-9.06682	18.6154		-7.72024	8.5858		-5.44668	-4.37386		-25.6689	-10.2104		-14.5026	-12.455		-14.8853	-10.9498		-9.09315	-9.50741
	0.8	18.4705		0.8	16.8308			-9.98296	10.1292					-5.03444	-4.78679		-25.0764	-10.0224		-15.2469	-11.1543		-15.3147	-10.505		-12.0559	-10.949
	0.9	18.7236		0.9	16.9952			-11.5125	11.8741					-4.46167	-5.41976		-25.3346	-10.4957		-16.16	-11.9805		-17.2066	-11.4957		-5.66413	-26.9942
	1	18.4018		1	17.1237			-11.0492	12.3204					-4.69661	-5.30979					-13.1694	-9.64726		-17.5027	-10.967		-5.75189	-24.8432
	1.1	18.7026		1.1	17.083			-9.91217	10.0329					-5.25568	-6.20421					-14.9117	-11.4318		-21.9225	-15.8326
	1.2	18.4171		1.2	16.7059									-5.53098	-4.22935					-18.8697	-18.5967		-23.5755	-16.1043
	1.3	18.7465		1.3	17.1141									-6.08768	-5.35701					-8.55708	-15.0972
	1.4	18.5626		1.4	16.9929									-6.33186	-5.28115					-9.29305	-14.266
	1.5	18.8016		1.5	17.0549									-4.57456	-4.80557					-19.1796	-19.2244
	1.6	18.4634		1.6	17.0991									-9.39508	-4.91104					-15.6216	-12.9895
	1.7	18.6928		1.7	17.112									-9.44967	-6.05675					-17.1405	-12.8143
	1.8	18.4715		1.8	17.0128									-11.8394	-5.90726					-16.9355	-13.1549
	1.9	18.73		1.9	17.1911									-10.267	-4.8399					-16.2357	-13.5368
	2	18.555		2	17.1564									-10.8482	-5.19					-14.4716	-11.2218
	2.1	18.7813		2.1	17.1022									-12.8199	-5.981					-16.5828	-16.4657
	2.2	18.4328		2.2	16.9637									-12.6891	-5.81634					-15.6002	-16.1194
	2.3	18.7225		2.3	17.0018															-24.2239	-11.0339
	2.4	18.5521		2.4	17.2234															-21.5011	-10.8363
	2.5	18.7092		2.5	16.8353															-23.3418	-12.3386
	2.6	18.3304		2.6	16.9249															-22.4396	-10.956
	2.7	18.756		2.7	16.9944															-23.2798	-12.4096
	2.8	18.4756		2.8	16.908															-22.255	-11.6844
	2.9	18.73		2.9	16.895															-27.3074	-15.4704
	3	18.6452		3	16.9462															-26.1095	-14.9528
	3.1	18.7614		3.1	16.9615															-23.7425	-12.5384
	3.2	18.5329		3.2	17.0209															-25.2992	-14.0735
	3.3	18.8097		3.3	17.1811															-26.0784	-13.1736
	3.4	18.4635		3.4	16.8807															-15.6002	-16.1194
	3.5	18.9218		3.5	17.1094
	3.6	18.5526		3.6	16.8836
	3.7	18.6698		3.7	16.8025
	3.8	18.1106		3.8	17.0984
	3.9	18.0052		3.9	17.0443
	4	17.2858		4	17.1655
	4.1	17.6452		4.1	16.9573
	4.2	17.2026		4.2	16.9872
	4.3	17.5894		4.3	16.8759
	4.4	17.3996		4.4	17.0568
	4.5	17.6875		4.5	17.0684
	4.6	17.3856		4.6	16.7601
	4.7	17.4266		4.7	16.8051
	4.8	17.2049		4.8	16.9463
	4.9	17.5679		4.9	16.6908
	5	17.1357		5	16.9977
	5.1	17.4873		5.1	16.8173
	5.2	17.1727		5.2	16.9121
	5.3	17.5732		5.3	16.9771
	5.4	17.0655		5.4	16.8089
	5.5	17.5729		5.5	16.6979
	5.6	17.047		5.6	16.9726
	5.7	17.5376		5.7	16.7375
	5.8	17.1496		5.8	16.9713
	5.9	17.5321		5.9	16.5311
	6	17.048		6	16.9528
	6.1	17.324		6.1	16.6501
	6.2	17.0159		6.2	15.7078
	6.3	17.3482		6.3	15.0885
	6.4	17.0788		6.4	14.4485
	6.5	17.337		6.5	14.3026
	6.6	16.97		6.6	14.3442
	6.7	17.4012		6.7	14.2408
	6.8	16.9571		6.8	14.001
	6.9	17.2641		6.9	14.0878
	7	17.1229		7	13.9738
	7.1	17.4386		7.1	13.9561
	7.2	16.9748		7.2	13.9379
	7.3	17.2509		7.3	13.9346
	7.4	16.8448		7.4	13.8502
	7.5	17.2804		7.5	13.8773
	7.6	16.8731		7.6	13.7379
	7.7	17.299		7.7	13.8578
	7.8	16.9326		7.8	13.676
	7.9	17.3498		7.9	13.8684
	8	16.7707		8	13.7213
	8.1	17.3325		8.1	13.7899
	8.2	16.8834		8.2	13.7881
	8.3	17.3022		8.3	13.7044
	8.4	16.8599		8.4	13.7837
	8.5	17.2628		8.5	13.7593
	8.6	16.9192		8.6	13.7978
	8.7	17.0723		8.7	13.8577
	8.8	16.784		8.8	13.6985
	8.9	17.2487		8.9	13.843
	9	16.7804		9	13.7793
	9.1	17.2155		9.1	13.6497
	9.2	16.8598		9.2	13.7312
	9.3	17.125		9.3	13.7112
	9.4	16.7931		9.4	13.8289
	9.5	17.3106		9.5	13.7649
	9.6	16.8023		9.6	13.4762
	9.7	17.3108		9.7	13.6906
	9.8	16.8673		9.8	13.5545
	9.9	17.518		9.9	13.7122
	10	17.0326		10	13.7546
	10.1	17.7002		10.1	13.6587
	10.2	17.2562		10.2	13.5811
	10.3	17.6429		10.3	13.7798
	10.4	17.4462		10.4	13.6874
	10.5	17.9638		10.5	13.7302
	10.6	17.6128		10.6	13.5914
	10.7	17.9264		10.7	13.5392
	10.8	17.5357		10.8	13.7223
	10.9	18.0236		10.9	13.5645
	11	17.7203		11	13.5982
	11.1	17.7492		11.1	13.4915
	11.2	17.4418		11.2	13.5292
	11.3	18.0515		11.3	13.6178
	11.4	17.5367		11.4	13.7153
	11.5	17.9632		11.5	13.4996
	11.6	17.5248		11.6	13.4656
	11.7	17.9651		11.7	13.7756
	11.8	17.6807		11.8	13.3848
	11.9	18.0142		11.9	13.3071
	12	17.5195		12	13.6404
	12.1	17.9459		12.1	13.3657
	12.2	17.4989		12.2	13.3782
	12.3	17.9558		12.3	13.5399
	12.4	17.6587		12.4	13.4815
	12.5	18.099		12.5	13.6192
	12.6	17.6217		12.6	13.4522
	12.7	18.018		12.7	13.4023
	12.8	17.6358		12.8	13.5223
	12.9	17.9884		12.9	13.3696
	13	17.6106		13	13.5626
	13.1	17.9227		13.1	13.5553
	13.2	17.6871		13.2	13.2457
	13.3	18.218		13.3	13.3115
	13.4	17.6561		13.4	13.5309
	13.5	18.0897		13.5	13.5454
	13.6	17.6454		13.6	13.1219
	13.7	18.187		13.7	13.4253
	13.8	17.7298		13.8	13.3736
	13.9	18.057		13.9	13.515
	14	17.6071		14	13.3298
	14.1	18.2157		14.1	13.4236
	14.2	17.7044		14.2	13.3942
	14.3	18.048		14.3	13.3721
	14.4	17.5477		14.4	13.258
	14.5	18.0905		14.5	13.4022
	14.6	17.7726		14.6	13.4495
	14.7	18.1805		14.7	13.2088
	14.8	17.7982		14.8	13.5228
	14.9	18.1382		14.9	13.9008
	15	17.6355		15	14.7719
	15.1	18.0027		15.1	15.1174
	15.2	17.6547		15.2	15.5232
	15.3	18.1434		15.3	15.7524
	15.4	17.5851		15.4	15.8834
	15.5	18.2057		15.5	15.8669
	15.6	17.8298		15.6	15.9276
	15.7	18.1289		15.7	15.99
	15.8	17.6263		15.8	16.0091
	15.9	18.2936		15.9	15.88
	16	17.7484		16	15.9026
	16.1	18.2289		16.1	16.1368
	16.2	17.7315		16.2	15.893
	16.3	18.1869		16.3	16.0148
	16.4	17.7794		16.4	15.8694
	16.5	18.258		16.5	15.8919
	16.6	17.5682		16.6	16.2598
	16.7	18.2436		16.7	15.9042
	16.8	17.744		16.8	15.7762
	16.9	18.229		16.9	15.9766
	17	17.6738		17	16.0788
	17.1	18.2912		17.1	15.9816
	17.2	17.7954		17.2	16.1813
	17.3	18.3276		17.3	15.9118
	17.4	17.7678		17.4	15.8353
	17.5	18.3477		17.5	16.11
	17.6	17.883		17.6	15.8455
	17.7	18.2405		17.7	16.2036
	17.8	18.027		17.8	15.7935
	17.9	18.3529		17.9	16.0972
	18	17.9192		18	15.9753
	18.1	18.3077		18.1	16.1456
	18.2	17.8896		18.2	15.9753
	18.3	18.283		18.3	15.9718
	18.4	18.1304		18.4	15.9663
	18.5	19.3302		18.5	16.1547
	18.6	19.4442		18.6	15.7811
	18.7	20.3913		18.7	16.2872
	18.8	20.104		18.8	16.103
	18.9	20.7738		18.9	16.0577
	19	20.3432		19	16.2065
	19.1	21.1697		19.1	16.0529
	19.2	20.683		19.2	15.9275
	19.3	21.2061		19.3	16.1125
	19.4	20.7356		19.4	15.9939
	19.5	21.2808		19.5	16.0696
	19.6	20.7853		19.6	15.9289
	19.7	21.4267		19.7	16.254
	19.8	21.0222		19.8	16.0142
	19.9	21.4088		19.9	15.9295
	20	20.9398		20	15.961
	20.1	21.4872		20.1	15.9687
	20.2	20.8471		20.2	16.2453
	20.3	21.5243		20.3	15.92
	20.4	20.8613		20.4	16.018
	20.5	21.3303		20.5	15.9985
	20.6	20.9337		20.6	16.0665
	20.7	21.5512		20.7	16.0745
	20.8	21.029		20.8	16.1558
	20.9	21.5081		20.9	15.9576
	21	20.8593		21	16.1007
	21.1	21.4021		21.1	15.8987
	21.2	20.772		21.2	16.0896
	21.3	21.577		21.3	16.3266
	21.4	21.0218		21.4	15.9118
	21.5	21.4487		21.5	16.2568
	21.6	20.9883		21.6	15.9854
	21.7	21.515		21.7	16.0037
	21.8	21.0079		21.8	16.1464
	21.9	21.6759		21.9	15.8773
	22	20.9215		22	16.0175
	22.1	21.5115		22.1	16.1391
	22.2	21.0931		22.2	16.1418
	22.3	21.3611		22.3	15.7261
	22.4	20.9414		22.4	16.1834
	22.5	21.5715		22.5	15.9708
	22.6	21.0788		22.6	16.0385
	22.7	21.6183		22.7	16.2621
	22.8	20.8457		22.8	16.1508
	22.9	21.0466		22.9	16.2222
	23	21.2413		23	16.1779
	23.1	21.3863		23.1	16.0493
	23.2	21.0265		23.2	16.0535
	23.3	21.6533		23.3	16.0997
	23.4	21.0704		23.4	16.0447
	23.5	21.6197		23.5	16.1605
	23.6	20.8687		23.6	16.1866
	23.7	21.1474		23.7	16.1732
	23.8	21.2847		23.8	16.0914
	23.9	21.5231		23.9	16.302
	24	20.9667		24	16.0534
	24.1	21.4987		24.1	16.167
	24.2	20.9768		24.2	16.0586
	24.3	21.6237		24.3	16.2712
	24.4	20.9983		24.4	16.2538
	24.5	21.0588		24.5	16.3
	24.6	21.3548		24.6	16.2732
	24.7	21.3662		24.7	15.9696
	24.8	21.2456		24.8	16.2448
	24.9	21.7332		24.9	16.2732
	25	20.9092		25	16.2498
	25.1	21.2547		25.1	15.9693
	25.2	21.3951		25.2	16.2849
	25.3	21.2711		25.3	16.178
	25.4	21.3483		25.4	16.2601
	25.5	21.2026		25.5	16.3405
	25.6	21.2882		25.6	16.1049
	25.7	21.5082		25.7	16.0863
	25.8	21.3239		25.8	16.3824
	25.9	21.2661		25.9	16.4224
	26	21.3375		26	16.3005
	26.1	21.2329		26.1	16.3368
	26.2	21.5659		26.2	16.2868
	26.3	21.1505		26.3	16.3309
	26.4	21.4717		26.4	16.3179
	26.5	20.9449		26.5	16.1222
	26.6	21.305		26.6	16.2605
	26.7	20.9675		26.7	16.1335
	26.8	21.0352		26.8	16.1686
	26.9	20.6994		26.9	16.1505
	27	20.7772		27	16.3377
	27.1	20.3958		27.1	16.3843
	27.2	20.5933		27.2	16.069
	27.3	20.1978		27.3	16.2701
	27.4	20.1857		27.4	16.2664
	27.5	19.9919		27.5	16.1855
	27.6	20.0145		27.6	16.1858
	27.7	19.7557		27.7	15.8461
	27.8	19.8184		27.8	16.3733
	27.9	19.4328		27.9	16.1461
	28	19.7902		28	16.2626
	28.1	19.4608		28.1	16.2195
	28.2	19.6244		28.2	16.1713
	28.3	19.104		28.3	16.1172
	28.4	19.5702		28.4	16.1587
	28.5	19.1991		28.5	16.0151
	28.6	19.4124		28.6	16.0992
	28.7	19.1287		28.7	16.2197
	28.8	19.2688		28.8	16.11
	28.9	19.0848		28.9	16.3689
	29	19.1944		29	16.1775
	29.1	19.0274		29.1	16.3234
	29.2	19.43		29.2	16.2479
	29.3	18.9389		29.3	16.4672
	29.4	19.1776		29.4	16.1646
	29.5	18.9717		29.5	16.1761
	29.6	19.3393		29.6	16.3415
	29.7	18.8351		29.7	16.3116
	29.8	19.3525		29.8	16.2704
	29.9	18.9904		29.9	16.1204
	30	19.2408		30	16.0748
	30.1	18.7736		30.1	16.3617
	30.2	19.0223		30.2	16.2731
	30.3	18.6757		30.3	16.2262
	30.4	19.0283		30.4	16.3962
	30.5	18.7207		30.5	16.426
	30.6	19.129		30.6	16.3158
	30.7	18.6888		30.7	16.201
	30.8	19.2213		30.8	16.1458
	30.9	18.6393		30.9	16.2329
	31	18.9887		31	16.2446
	31.1	18.7655		31.1	16.3098
	31.2	19.0825		31.2	16.2172
	31.3	18.6667		31.3	16.0087
	31.4	19.0474		31.4	16.2296
	31.5	18.6211		31.5	16.2374
	31.6	18.9749		31.6	16.2289
	31.7	18.5229		31.7	16.2504
	31.8	19.0882		31.8	16.4561
	31.9	18.5493		31.9	16.3215
	32	18.9307		32	16.2295
	32.1	18.6076		32.1	16.1643
	32.2	19.0493		32.2	16.0938
	32.3	18.6014		32.3	16.4467
	32.4	18.9204		32.4	16.5139
	32.5	18.5217		32.5	16.268
	32.6	18.8921		32.6	16.134
	32.7	18.4926		32.7	16.3389
	32.8	18.8968		32.8	16.2864
	32.9	18.6206		32.9	16.3596
	33	18.9232		33	16.3966
	33.1	18.5741		33.1	16.277
	33.2	19.0659		33.2	16.4173
	33.3	18.5534		33.3	16.1283
	33.4	19.1545		33.4	16.4093
	33.5	18.4697		33.5	16.1574
	33.6	18.9271		33.6	16.1539
	33.7	18.5227		33.7	16.1502
	33.8	18.954		33.8	16.324
	33.9	18.6625		33.9	16.1757
	34	18.9052		34	16.1278
	34.1	18.5342		34.1	16.0833
	34.2	18.9962		34.2	16.2127
	34.3	18.477		34.3	16.1722
	34.4	18.9539		34.4	16.3877
	34.5	18.6312		34.5	16.3483
	34.6	18.9141		34.6	16.284
	34.7	18.6083		34.7	16.207
	34.8	18.8928		34.8	16.1024
	34.9	18.5927		34.9	16.3608
	35	18.9367		35	16.0077
	35.1	18.3641		35.1	16.3634
	35.2	18.834		35.2	16.5813
	35.3	18.6879		35.3	16.3912
	35.4	18.9289		35.4	16.0481
	35.5	18.5084		35.5	16.2354
	35.6	19.1432		35.6	16.3505
	35.7	18.5042		35.7	16.2195
	35.8	19.0363		35.8	16.2371
	35.9	18.5197		35.9	16.3037
	36	18.869		36	16.331
	36.1	18.4655		36.1	16.0804
	36.2	18.9973		36.2	16.366
	36.3	18.5236		36.3	16.3705
	36.4	18.9723		36.4	16.2587
	36.5	18.4065		36.5	16.2012
	36.6	18.9303		36.6	16.251
	36.7	18.3512		36.7	16.3414
	36.8	18.8402		36.8	16.4092
				36.9	16.2144
				37	16.1719
				37.1	16.1277
				37.2	16.2139
				37.3	16.0166
				37.4	15.883
				37.5	15.844
				37.6	15.6302
				37.7	15.6082
				37.8	15.702
				37.9	15.5794
				38	15.4959
				38.1	15.2847
				38.2	15.6811
				38.3	15.4825
				38.4	15.5864
				38.5	15.4999
				38.6	15.7456
				38.7	15.4931
				38.8	15.5165
				38.9	15.3964
				39	15.4526
				39.1	15.431
				39.2	15.4215
				39.3	15.3813
				39.4	15.433
				39.5	15.3428
				39.6	15.1913
				39.7	15.5734
				39.8	15.1967
				39.9	15.3395
				40	15.4615
				40.1	15.342
				40.2	15.2907
				40.3	15.393
				40.4	15.2853
				40.5	15.391
				40.6	15.4723
				40.7	15.2758
				40.8	15.112
				40.9	15.4139
				41	15.315
				41.1	15.2096
				41.2	15.2352
				41.3	15.2858
				41.4	15.339
				41.5	15.0957
				41.6	15.2828
				41.7	15.5528
				41.8	15.3684
				41.9	15.297
				42	15.1791
				42.1	15.1903
				42.2	15.3051
				42.3	15.232
				42.4	15.3362
				42.5	15.4762
				42.6	15.4215
				42.7	15.2283
				42.8	15.2873
				42.9	15.2181
				43	15.3644
				43.1	15.099
				43.2	15.1233
				43.3	15.4854
				43.4	15.2512
				43.5	15.1237
				43.6	15.4187
				43.7	15.2476
				43.8	15.2287
				43.9	15.1556
				44	15.3412
				44.1	15.339
				44.2	15.4068
				44.3	15.1969
				44.4	15.3033
				44.5	15.3577
				44.6	15.1919
				44.7	15.1218
				44.8	15.341
				44.9	15.3123
				45	15.1288
				45.1	15.2156
				45.2	15.3786
				45.3	15.1434
				45.4	15.3154
				45.5	15.2655
				45.6	15.317
				45.7	15.0894
				45.8	15.4791
				45.9	15.2834
				46	15.0273
				46.1	15.1797
				46.2	15.2832
				46.3	15.3427
				46.4	15.3378
				46.5	15.0767
				46.6	15.2187
				46.7	15.3127
				46.8	15.3414
				46.9	15.0614
				47	15.4917
				47.1	15.4066
				47.2	15.4884
				47.3	15.4245
				47.4	15.3047
				47.5	15.2619
				47.6	15.389
				47.7	15.3751
				47.8	15.1977
				47.9	15.3219
				48	15.3357
				48.1	15.4229
				48.2	15.4088
				48.3	15.3055
				48.4	15.0885
				48.5	15.228
				48.6	15.1228
				48.7	15.1062
				48.8	15.3844
				48.9	15.2654
				49	15.276
				49.1	15.1882
				49.2	15.323
				49.3	15.1797
				49.4	15.5402
				49.5	15.8184
				49.6	15.7749
				49.7	15.7392
				49.8	15.6419
				49.9	16.1303
				50	15.864
				50.1	15.8087
				50.2	15.8117
				50.3	15.9482
				50.4	16.257
				50.5	15.8602
				50.6	15.9955
				50.7	16.132
				50.8	15.9215
				50.9	16.0404
				51	16.1937
				51.1	16.0974
				51.2	16.0642
				51.3	15.9631
				51.4	16.0383
				51.5	16.0382
				51.6	16.3598
				51.7	16.0148
				51.8	15.9911
				51.9	16.1522
				52	16.0492
				52.1	16.2541
				52.2	16.2964
				52.3	16.2448
				52.4	16.1042
				52.5	16.307
				52.6	16.1445
				52.7	16.1369
				52.8	16.0854
				52.9	16.214
				53	16.3147
				53.1	16.3752
				53.2	16.2494
				53.3	16.445
				53.4	16.2634
				53.5	16.3674
				53.6	16.3008
				53.7	16.1408
				53.8	16.1431
				53.9	16.2086
				54	16.4246
				54.1	16.4198
				54.2	16.4816
				54.3	16.3997
				54.4	16.4498
				54.5	16.4378
				54.6	16.3617
				54.7	16.4567
				54.8	16.2796
				54.9	16.3324
				55	16.1755
				55.1	16.2026
				55.2	16.3252
				55.3	16.1371
				55.4	16.2369
				55.5	16.1519
				55.6	16.2766
				55.7	16.4385
				55.8	16.4006
				55.9	16.3769
				56	16.3409
				56.1	16.0605
				56.2	16.2031
				56.3	16.4049
				56.4	16.3497
				56.5	16.1398
				56.6	16.2975
				56.7	16.3148
				56.8	16.0406
				56.9	16.3432
				57	16.439
				57.1	16.3033
				57.2	16.2613
				57.3	16.3485
				57.4	16.4157
				57.5	16.2432
				57.6	16.3327
				57.7	16.3412
				57.8	16.3595
				57.9	16.1249
				58	16.5234
				58.1	16.2763
				58.2	16.2949
				58.3	16.2613
				58.4	16.4517
				58.5	16.4876
				58.6	16.3476
				58.7	16.3474
				58.8	16.2852
				58.9	16.3429
				59	16.3127
				59.1	16.5299
				59.2	16.0705

## Sheet: Ext Data Fig - Statistics
Table Analyzed				T84	E175	F181	F188	A414	P415	N419
Column B				84-LY	175-LY	181-LY	188-LY	414-LY	415-LY	419-LY
vs.				vs.	vs.	vs.	vs.	vs.	vs.	vs.
Column A				84-ACh_LY	175-ACh_LY	181-ACh_LY	188-ACh_LY	414-ACh_LY	415-ACh_LY	419-ACh_LY
Paired t test
P value				0.0006	0.0147	0.0041	0.0002	<0.0001	<0.0001	0.0166
P value summary				***	*	**	***	****	****	*
Significantly different (P < 0.05)?				Yes	Yes	Yes	Yes	Yes	Yes	Yes
One- or two-tailed P value?				Two-tailed	Two-tailed	Two-tailed	Two-tailed	Two-tailed	Two-tailed	Two-tailed
t, df				t=4.715, df=11	t=3.216, df=7	t=3.206, df=22	t=5.903, df=9	t=5.499, df=34	t=17.98, df=12	t=3.017, df=8
Number of pairs				12	8	23	10	35	13	9
How large is the effect?
Mean of differences (B - A)				-5.609	-3.547	1.806	8.684	4.783	5.804	-3.788
SD of differences				4.121	3.12	2.702	4.652	5.145	1.164	3.766
SEM of differences				1.19	1.103	0.5635	1.471	0.8697	0.3229	1.255
95% confidence interval				-8.228 to -2.991	-6.156 to -0.9390	0.6377 to 2.975	5.357 to 12.01	3.016 to 6.551	5.101 to 6.508	-6.683 to -0.8931
R squared (partial eta squared)				0.669	0.5963	0.3184	0.7948	0.4708	0.9642	0.5323
How effective was the pairing?
Correlation coefficient (r)				-0.2598	0.7612	0.1843	0.6335	0.1812	0.9517	0.868
P value (one tailed)				0.2074	0.0141	0.2	0.0246	0.1487	<0.0001	0.0012
P value summary				ns	*	ns	*	ns	****	**
Was the pairing significantly effective?				No	Yes	No	Yes	No	Yes	Yes
