# Supplementary material for: Ligand-specific activation trajectories dictate GPCR signalling in cells
Source: Nature. 2026 Jan 14;650(8103):1053–62. doi: 10.1038/s41586-025-09963-3 (PMC12935549; doi:10.1038/s41586-025-09963-3)
Supplement: Supplementary file 15 — Source Data Extended Data Fig. 4 [file 41586_2025_9963_MOESM15_ESM.xlsx]

## Sheet: Ext Data Fig 4a-g
a)	Time (s)	T84		b)	Time (s)	E175		c)	Time (s)	F181		d)	Time (s)	F188		e)	Time (s)	A414		f)	Time (s)	P415		g)	Time (s)	N419
	0	0.097103			0	-0.0850783			0	0.00690214			0	1.30231			0	-0.62959			0	-0.428912			0	-0.64117
	0.1	-0.609656			0.1	0.510938			0.1	-0.201085			0.1	0.355862			0.1	-1.8253			0.1	-0.48218			0.1	0.408029
	0.2	-0.255637			0.2	0.0502005			0.2	-0.380872			0.2	-0.518458			0.2	0.608704			0.2	1.31064			0.2	0.0311243
	0.3	-0.318617			0.3	-0.474792			0.3	0.119129			0.3	-0.781745			0.3	0.518166			0.3	0.226745			0.3	1.20555
	0.4	0.274325			0.4	0.0493606			0.4	-0.0653265			0.4	-0.894387			0.4	0.530519			0.4	0.248654			0.4	-1.23003
	0.5	0.354274			0.5	0.200474			0.5	0.0472868			0.5	0.142232			0.5	0.148855			0.5	0.489699			0.5	-0.187117
	0.6	0.278727			0.6	0.127019			0.6	0.0677403			0.6	0.277773			0.6	-0.379432			0.6	0.021941			0.6	-0.303513
	0.7	0.0167282			0.7	0.00479337			0.7	0.701988			0.7	0.164922			0.7	0.409105			0.7	-0.544297			0.7	0.0884216
	0.8	0.363717			0.8	-0.0649457			0.8	-0.331369			0.8	0.0890563			0.8	0.284772			0.8	-0.800721			0.8	0.0740498
	0.9	-0.200965			0.9	-0.317969			0.9	0.0356063			0.9	0.117442			0.9	0.334201			0.9	-0.04157			0.9	0.554663
	1	-0.120094			1	-0.137822			1	0.179256			1	0.189514			1	-0.783967			1	-0.471917			1	-0.701479
	1.1	-0.261886			1.1	-0.234292			1.1	-0.0912366			1.1	1.00857			1.1	2.57367			1.1	0.120381			1.1	0.780165
	1.2	-0.122721			1.2	-0.137795			1.2	-0.117859			1.2	0.740929			1.2	0.378136			1.2	0.191643			1.2	-0.185513
	1.3	-0.122082			1.3	-0.38578			1.3	0.24099			1.3	0.787857			1.3	0.138762			1.3	0.174707			1.3	-0.142533
	1.4	0.373161			1.4	-0.164755			1.4	0.290328			1.4	0.585789			1.4	0.316369			1.4	-0.370212			1.4	-1.32031
	1.5	0.138213			1.5	-0.0714067			1.5	-0.172031			1.5	0.240863			1.5	-0.8789			1.5	-0.312743			1.5	-0.45763
	1.6	-0.373927			1.6	0.419342			1.6	0.293079			1.6	0.579499			1.6	-0.88014			1.6	-0.154443			1.6	-0.784872
	1.7	0.196648			1.7	0.346147			1.7	0.411992			1.7	0.985955			1.7	-1.21599			1.7	-0.304321			1.7	-1.29059
	1.8	0.172792			1.8	0.610736			1.8	-0.296874			1.8	1.60708			1.8	-0.376167			1.8	1.06791			1.8	-1.29297
	1.9	0.699985			1.9	0.201732			1.9	0.214961			1.9	2.35214			1.9	-0.416633			1.9	-0.329505			1.9	-0.675551
	2	-0.27779			2	-0.502694			2	0.0105867			2	1.93814			2	-1.16574			2	0.661475			2	-1.24983
	2.1	-0.0267963			2.1	-0.456093			2.1	0.512604			2.1	1.49357			2.1	-0.66417			2.1	0.640258			2.1	-1.62896
	2.2	0.73009			2.2	0.0682179			2.2	-0.461			2.2	1.22124			2.2	-1.52573			2.2	0.474523			2.2	-0.376543
	2.3	-0.161133			2.3	-0.0439233			2.3	0.234549			2.3	0.256188			2.3	-0.0774128			2.3	-0.121823			2.3	-0.842053
	2.4	-0.0546293			2.4	-0.0346029			2.4	0.0469555			2.4	-0.592143			2.4	-0.797591			2.4	-0.0627776			2.4	-0.495336
	2.5	-0.366259			2.5	-0.12053			2.5	-0.070135			2.5	-0.188411			2.5	-0.934058			2.5	0.516643			2.5	-1.91037
	2.6	-0.745341			2.6	-0.0638365			2.6	-0.32247			2.6	0.957641			2.6	0.0879515			2.6	0.906833			2.6	-1.8015
	2.7	-0.0696108			2.7	-0.241699			2.7	0.20458			2.7	1.58186			2.7	-0.230895			2.7	0.671535			2.7	-1.63033
	2.8	-0.103763			2.8	0.223182			2.8	0.0793442			2.8	2.0962			2.8	0.206524			2.8	0.452288			2.8	-1.36494
	2.9	0.232576			2.9	0.129579			2.9	0.0563703			2.9	2.52879			2.9	0.630381			2.9	0.865404			2.9	-1.53082
	3	0.512823			3	0.290191			3	0.200612			3	2.45041			3	0.589664			3	0.885747			3	-2.08781
	3.1	0.0519454			3.1	0.261882			3.1	0.469467			3.1	1.94175			3.1	1.51089			3.1	0.639841			3.1	-1.42951
	3.2	0.276313			3.2	-0.143496			3.2	-0.352035			3.2	0.338936			3.2	0.144711			3.2	0.70622			3.2	-2.32368
	3.3	-0.00812268			3.3	0.341462			3.3	0.420878			3.3	-0.0836605			3.3	0.65526			3.3	0.492069			3.3	-2.19025
	3.4	0.250184			3.4	-0.010704			3.4	-0.0993983			3.4	0.0751671			3.4	2.42711			3.4	1.27181			3.4	-1.23096
	3.5	0.011048			3.5	0.159418			3.5	-0.106285			3.5	-0.00160773			3.5	0.462474			3.5	1.07506			3.5	-2.13398
	3.6	0.137574			3.6	0.248804			3.6	-0.604861			3.6	0.0810124			3.6	1.07734			3.6	-0.228339			3.6	-1.73108
	3.7	-0.0265833			3.7	0.289676			3.7	0.0427083			3.7	0.724465			3.7	1.71453			3.7	-0.052067			3.7	-2.00613
	3.8	-0.175902			3.8	0.100814			3.8	0.746075			3.8	1.64276			3.8	0.229802			3.8	0.516613			3.8	-2.29509
	3.9	0.194944			3.9	0.467778			3.9	0.263574			3.9	2.64896			3.9	0.190576			3.9	0.813591			3.9	-2.5286
	4	0.175845			4	-0.0900266			4	0.253299			4	1.96804			4	-1.18615			4	1.62199			4	-3.23462
	4.1	-0.0997869			4.1	-0.086837			4.1	-0.21925			4.1	1.35956			4.1	-0.603267			4.1	0.271703			4.1	-3.41858
	4.2	0.741309			4.2	0.319872			4.2	-0.480458			4.2	0.959287			4.2	-0.132053			4.2	1.05777			4.2	-3.1688
	4.3	0.304004			4.3	0.0197382			4.3	0.549015			4.3	1.13257			4.3	0.0768854			4.3	1.85873			4.3	-2.95008
	4.4	0.344334			4.4	-0.174608			4.4	0.370747			4.4	-0.162489			4.4	-0.00271238			4.4	0.129922			4.4	-2.6926
	4.5	0.165975			4.5	-0.061355			4.5	0.334727			4.5	-0.2022			4.5	1.22342			4.5	0.567806			4.5	-2.31664
	4.6	-0.280985			4.6	0.0545463			4.6	0.605629			4.6	-0.44547			4.6	0.361984			4.6	0.508842			4.6	-2.1345
	4.7	0.221783			4.7	-0.11536			4.7	-0.308466			4.7	-0.288474			4.7	-0.256512			4.7	0.359971			4.7	-2.77438
	4.8	0.386012			4.8	-0.166856			4.8	0.451214			4.8	-0.780116			4.8	0.137679			4.8	0.260331			4.8	-2.28217
	4.9	0.422791			4.9	0.174591			4.9	0.0962099			4.9	-0.787806			4.9	0.283077			4.9	0.0829396			4.9	-3.84768
	5	0.108037			5	-0.137684			5	0.459252			5	-0.397413			5	1.1859			5	0.456499			5	-3.31309
	5.1	-0.199971			5.1	0.428715			5.1	0.262945			5.1	0.644608			5.1	-0.493327			5.1	-0.120857			5.1	-4.85386
	5.2	0.581269			5.2	0.890055			5.2	0.331863			5.2	0.536217			5.2	0.404224			5.2	1.00629			5.2	-4.21113
	5.3	-0.00421755			5.3	0.0416881			5.3	0.119937			5.3	1.42765			5.3	0.904256			5.3	0.963325			5.3	-5.46953
	5.4	-0.0971598			5.4	0.597357			5.4	0.0358871			5.4	1.49655			5.4	1.34692			5.4	-0.34876			5.4	-3.91622
	5.5	0.495214			5.5	-0.128054			5.5	0.266144			5.5	1.51432			5.5	0.295116			5.5	0.243823			5.5	-6.20767
	5.6	0.158023			5.6	0.0633776			5.6	-0.536786			5.6	0.164272			5.6	0.530252			5.6	0.275843			5.6	-4.42138
	5.7	0.0638028			5.7	0.221821			5.7	0.495794			5.7	-0.105205			5.7	1.51271			5.7	0.3451			5.7	-4.71288
	5.8	0.193595			5.8	-0.344072			5.8	0.0790958			5.8	-0.333009			5.8	1.17144			5.8	0.352617			5.8	-4.80267
	5.9	0.291295			5.9	-0.308415			5.9	0.577246			5.9	-0.307028			5.9	1.28586			5.9	-0.827137			5.9	-4.70023
	6	0.381823			6	-0.130608			6	0.116271			6	-0.26788			6	1.12691			6	0.831757			6	-5.30007
	6.1	0.529579			6.1	-0.00377759			6.1	0.40736			6.1	0.744107			6.1	0.942509			6.1	0.454709			6.1	-5.46872
	6.2	0.964185			6.2	-0.275509			6.2	0.492163			6.2	1.17573			6.2	0.726978			6.2	-0.0125303			6.2	-5.15224
	6.3	0.278443			6.3	0.0416676			6.3	0.13249			6.3	1.04777			6.3	0.822257			6.3	0.236224			6.3	-5.4705
	6.4	0.986338			6.4	0.211995			6.4	-0.544195			6.4	-0.0750253			6.4	1.32129			6.4	0.00302196			6.4	-5.88596
	6.5	1.43635			6.5	-0.357913			6.5	0.146691			6.5	0.0697625			6.5	0.723054			6.5	-0.149927			6.5	-4.17118
	6.6	1.38388			6.6	0.232002			6.6	-0.0352612			6.6	0.167954			6.6	1.48756			6.6	0.0497804			6.6	-6.7573
	6.7	1.63005			6.7	0.858694			6.7	0.323001			6.7	0.163961			6.7	0.928884			6.7	0.90309			6.7	-4.71725
	6.8	1.0981			6.8	0.604178			6.8	0.0699717			6.8	0.525602			6.8	0.572837			6.8	-0.0732543			6.8	-5.4894
	6.9	1.18025			6.9	0.502308			6.9	0.241253			6.9	1.11335			6.9	0.890804			6.9	-0.0100891			6.9	-5.79795
	7	1.18472			7	0.284353			7	0.261462			7	0.920623			7	0.209302			7	0.773138			7	-4.30665
	7.1	1.83134			7.1	-0.216164			7.1	0.366483			7.1	1.29153			7.1	1.89778			7.1	0.164444			7.1	-5.01931
	7.2	1.30493			7.2	0.278354			7.2	1.20209			7.2	0.51251			7.2	2.03905			7.2	0.0843636			7.2	-5.79849
	7.3	1.54768			7.3	0.550135			7.3	0.275362			7.3	0.308687			7.3	0.839021			7.3	0.719239			7.3	-5.67384
	7.4	2.31231			7.4	0.588531			7.4	0.467018			7.4	0.320231			7.4	1.51184			7.4	-0.351008			7.4	-4.90464
	7.5	0.933441			7.5	0.389576			7.5	0.592301			7.5	0.282102			7.5	2.24503			7.5	-0.0735594			7.5	-5.08323
	7.6	1.64858			7.6	0.00630652			7.6	0.399671			7.6	-0.376811			7.6	0.647726			7.6	-0.628304			7.6	-4.57291
	7.7	1.17776			7.7	-0.379863			7.7	0.369141			7.7	-0.908292			7.7	1.78391			7.7	1.05049			7.7	-5.05513
	7.8	1.24685			7.8	0.235367			7.8	0.0670305			7.8	-0.895054			7.8	0.796844			7.8	0.0682926			7.8	-5.20787
	7.9	1.0349			7.9	0.0432008			7.9	0.63363			7.9	-0.712136			7.9	1.48571			7.9	0.376734			7.9	-4.63344
	8	1.76012			8	0.694477			8	0.05582			8	-0.5661			8	0.218061			8	0.348884			8	-4.41635
	8.1	1.70666			8.1	1.02729			8.1	0.527347			8.1	0.0504787			8.1	0.380851			8.1	0.704348			8.1	-4.87869
	8.2	1.90831			8.2	0.661884			8.2	0.497735			8.2	0.385962			8.2	0.201234			8.2	-0.118365			8.2	-5.37003
	8.3	1.85548			8.3	0.176446			8.3	0.285755			8.3	0.970352			8.3	0.135795			8.3	0.221923			8.3	-5.25141
	8.4	1.56515			8.4	0.719892			8.4	-0.0988218			8.4	0.807001			8.4	1.64388			8.4	-0.747494			8.4	-5.07058
	8.5	1.27844			8.5	0.703882			8.5	0.367651			8.5	1.00778			8.5	1.28209			8.5	0.716178			8.5	-5.66359
	8.6	1.64382			8.6	0.356696			8.6	0.145511			8.6	1.20631			8.6	0.085911			8.6	-0.559372			8.6	-4.29858
	8.7	0.946506			8.7	0.39319			8.7	0.23481			8.7	0.0458699			8.7	0.968942			8.7	0.110942			8.7	-3.75569
	8.8	1.1539			8.8	0.351461			8.8	0.0248488			8.8	0.089128			8.8	0.103774			8.8	-0.797395			8.8	-4.93739
	8.9	0.776455			8.9	0.401053			8.9	-0.166559			8.9	0.222877			8.9	0.792983			8.9	0.241025			8.9	-5.78482
	9	1.60974			9	0.115509			9	0.301178			9	-0.00471569			9	1.30611			9	0.729065			9	-5.2713
	9.1	1.76126			9.1	0.475761			9.1	-0.193265			9.1	0.000812039			9.1	-0.989295			9.1	-0.664616			9.1	-6.27934
	9.2	1.61315			9.2	0.511131			9.2	0.143273			9.2	0.348868			9.2	0.990604			9.2	0.136421			9.2	-4.76479
	9.3	1.30365			9.3	0.361142			9.3	0.515524			9.3	0.681327			9.3	1.11918			9.3	0.532918			9.3	-5.66145
	9.4	1.65831			9.4	0.730031			9.4	0.28461			9.4	0.535932			9.4	0.737966			9.4	0.00316436			9.4	-5.17076
	9.5	1.4955			9.5	0.391569			9.5	-0.252869			9.5	-0.152021			9.5	0.045288			9.5	1.1057			9.5	-7.00612
	9.6	1.61968			9.6	0.179662			9.6	0.195956			9.6	0.00449074			9.6	-1.34222			9.6	1.11305			9.6	-5.49222
	9.7	1.55457			9.7	0.544924			9.7	0.433662			9.7	0.318758			9.7	0.944942			9.7	0.811465			9.7	-5.44099
	9.8	1.20666			9.8	0.862876			9.8	-0.021807			9.8	-0.540734			9.8	1.11731			9.8	-0.135667			9.8	-5.83683
	9.9	1.06785			9.9	0.455341			9.9	0.165532			9.9	-0.929282			9.9	0.904947			9.9	0.581171			9.9	-6.36033
	10	1.32225			10	0.189755			10	0.372118			10	-0.581685			10	0.696448			10	1.03671			10	-6.55853
	10.1	0.989178			10.1	1.54213			10.1	0.771055			10.1	-0.789232			10.1	0.29317			10.1	0.702019			10.1	-7.98667
	10.2	1.5092			10.2	3.45743			10.2	0.49886			10.2	-1.85178			10.2	1.29413			10.2	0.822043			10.2	-6.6381
	10.3	1.43522			10.3	3.53002			10.3	0.688526			10.3	-1.96028			10.3	0.338957			10.3	0.487441			10.3	-6.69637
	10.4	1.53739			10.4	3.45251			10.4	0.369217			10.4	-2.09909			10.4	0.860133			10.4	-0.317167			10.4	-6.45863
	10.5	1.40696			10.5	3.33198			10.5	0.10868			10.5	-1.70145			10.5	1.09492			10.5	-0.300059			10.5	-7.40248
	10.6	1.69736			10.6	3.89375			10.6	0.454016			10.6	-1.50092			10.6	-0.188985			10.6	-1.26422			10.6	-7.03027
	10.7	1.36194			10.7	3.30194			10.7	0.471883			10.7	-0.800973			10.7	0.718533			10.7	-0.00891941			10.7	-7.74868
	10.8	1.56394			10.8	3.90563			10.8	0.670609			10.8	-0.177503			10.8	-0.0355655			10.8	0.395419			10.8	-6.84002
	10.9	1.13523			10.9	3.4943			10.9	0.471075			10.9	-0.239255			10.9	1.287			10.9	-0.165947			10.9	-7.83393
	11	0.985628			11	3.65047			11	0.945699			11	-0.0897041			11	0.833716			11	-0.0639168			11	-6.76867
	11.1	1.57239			11.1	3.96553			11.1	0.320244			11.1	0.294722			11.1	0.835976			11.1	0.719545			11.1	-6.69111
	11.2	1.14531			11.2	3.59392			11.2	1.09635			11.2	-0.259585			11.2	0.485626			11.2	0.508343			11.2	-7.18408
	11.3	1.51687			11.3	4.01253			11.3	0.519776			11.3	-0.503227			11.3	0.995375			11.3	0.136869			11.3	-7.69206
	11.4	1.67875			11.4				11.4	0.338235			11.4	0.0743673			11.4	-0.342435			11.4	-0.925282			11.4	-7.87178
	11.5	1.69445			11.5	3.45743			11.5	0.250002			11.5	-0.204657			11.5	1.14682			11.5	-0.258325			11.5	-7.30958
	11.6	1.48002			11.6	3.53002			11.6	0.658598			11.6	0.00205655			11.6	-0.988102			11.6	0.0111897			11.6	-7.05571
	11.7	1.4786			11.7	3.45251			11.7	0.046488			11.7	0.633308			11.7	1.43444			11.7	-0.195445			11.7	-8.11016
	11.8	1.33198			11.8	3.33198			11.8	0.446149			11.8	1.00459			11.8	0.387114			11.8	-0.830443			11.8	-6.85525
	11.9	1.57019			11.9	3.89375			11.9	-0.219869			11.9	0.857537			11.9	0.432132			11.9	-1.14754			11.9	-6.70225
	12	1.50956			12	3.30194			12	0.407841			12	0.518299			12	0.331375			12	-1.91453			12	-6.86949
	12.1	1.15724			12.1	3.90563			12.1	0.639473			12.1	-0.060746			12.1	0.675635			12.1	-2.63041			12.1	-6.71342
	12.2	0.969014			12.2	3.4943			12.2	-0.0111592			12.2	-0.085327			12.2	0.52818			12.2	-2.02924			12.2	-7.06423
	12.3	1.08922			12.3	3.65047			12.3	0.334155			12.3	-0.785667			12.3	-1.3697			12.3	-1.98735			12.3	-7.83308
	12.4	1.20673			12.4	3.96553			12.4	0.862273			12.4	-1.57839			12.4	0.715096			12.4	-2.48709			12.4	-7.17748
	12.5	1.16846			12.5	3.59392			12.5	0.659417			12.5	-1.40121			12.5	1.08179			12.5	-2.54377			12.5	-7.7034
	12.6	0.762254			12.6	4.01253			12.6	0.493132			12.6	-1.84734			12.6	-0.0400076			12.6	-3.04671			12.6	-7.91036
	12.7	1.34085			12.7				12.7	0.101727			12.7	-2.12561			12.7	1.39346			12.7	-3.46879			12.7	-8.5897
	12.8	1.50714			12.8	3.59392			12.8	0.734593			12.8	-2.39739			12.8	1.0457			12.8	-2.07287			12.8	-8.09629
	12.9	1.81536			12.9	4.01253			12.9	-0.0905275			12.9	-1.76154			12.9	0.457718			12.9	-2.18862			12.9	-7.82781
	13	2.39993			13				13	0.794707			13	-1.07977			13	0.509689			13	-1.98898			13	-6.55076
	13.1	1.2215			13.1	3.45743			13.1	0.590245			13.1	-1.32843			13.1	0.625939			13.1	-3.06602			13.1	-8.07765
	13.2	1.92144			13.2	3.53002			13.2	0.252732			13.2	-2.05993			13.2	1.37797			13.2	-2.43015			13.2	-8.22954
	13.3	1.37664			13.3	3.45251			13.3	0.377819			13.3	-0.947218			13.3	0.0407831			13.3	-2.45904			13.3	-7.38282
	13.4	1.86585			13.4	3.33198			13.4	0.134313			13.4	0.555141			13.4	1.05019			13.4	-2.12472			13.4	-7.69107
	13.5	1.75799			13.5	3.89375			13.5	0.727771			13.5	0.635975			13.5	0.339051			13.5	-2.52685			13.5	-7.26932
	13.6	2.47547			13.6	3.30194			13.6	0.509813			13.6	-0.493199			13.6	0.473446			13.6	-1.65291			13.6	-8.06201
	13.7	1.72753			13.7	3.90563			13.7	0.360932			13.7	0.371905			13.7	-0.162599			13.7	-1.6264			13.7	-7.83394
	13.8	2.17527			13.8	3.4943			13.8	-0.0857585			13.8	0.229017			13.8	-1.74181			13.8	-2.42743			13.8	-8.68276
	13.9	2.01019			13.9	3.65047			13.9	0.183991			13.9	-0.233947			13.9	0.863225			13.9	-2.52666			13.9	-6.90589
	14	1.38218			14	3.96553			14	-0.0805316			14	-0.0585733			14	1.32874			14	-2.19456			14	-8.88672
	14.1	2.47618			14.1	3.59392			14.1	-0.338881			14.1	-0.0124513			14.1	-0.0618731			14.1	-2.79979			14.1	-7.93441
	14.2	2.54108			14.2	4.01253			14.2	0.402551			14.2	1.12732			14.2	0.549229			14.2	-1.77149			14.2	-8.47165
	14.3	2.75657			14.3	3.81872			14.3	0.104848			14.3	0.675095			14.3	1.12924			14.3	-1.93586			14.3	-7.63861
	14.4	2.3596			14.4	3.80441			14.4	0.394691			14.4	-0.595639			14.4	1.35175			14.4	-2.00059			14.4	-7.89907
	14.5	2.28696			14.5	3.33871			14.5	-0.322936			14.5	-0.370258			14.5	0.0539526			14.5	-1.89829			14.5	-8.7983
	14.6	1.83915			14.6	3.10935			14.6	-0.260762			14.6	-0.790726			14.6	-1.20233			14.6	-2.82595			14.6	-7.8998
	14.7	2.65809			14.7	3.57694			14.7	0.369076			14.7	-1.0928			14.7	0.212567			14.7	-2.4778			14.7	-8.34003
	14.8	2.40305			14.8	3.64165			14.8	-0.166333			14.8	-1.21741			14.8	1.14464			14.8	-1.49542			14.8	-8.7399
	14.9	2.05251			14.9	3.40897			14.9	0.276212			14.9	-1.57291			14.9	0.274067			14.9	-1.40841			14.9	-9.58304
	15	2.74138			15	3.36033			15	0.189979			15	-1.0885			15	-1.16949			15	-2.34495			15	-10.4568
	15.1	2.63928			15.1	3.72799			15.1	0.275369			15.1	-0.287153			15.1	-1.26174			15.1	-2.39837			15.1	-9.93424
	15.2	2.1402			15.2	4.26568			15.2	-0.427499			15.2	-0.515687			15.2	-1.44621			15.2	-2.87939			15.2	-9.82307
	15.3	2.89844			15.3	3.56616			15.3	-0.151479			15.3	-0.15562			15.3	-4.34716			15.3	-1.60991			15.3	-11.9053
	15.4	2.75529			15.4	3.49202			15.4	-0.177583			15.4	-0.0214509			15.4	-2.56328			15.4	-1.72204			15.4	-10.0647
	15.5	2.34611			15.5	3.37837			15.5	0.0413656			15.5	-0.162671			15.5	-2.63768			15.5	-2.1723			15.5	-11.3702
	15.6	2.57417			15.6	4.0351			15.6	0.128234			15.6	0.473463			15.6	-3.48759			15.6	-1.12991			15.6	-11.4986
	15.7	2.38012			15.7	6.04277			15.7	0.441799			15.7	0.835332			15.7	-2.82215			15.7	-2.04552			15.7	-11.626
	15.8	2.45396			15.8	7.24359			15.8	-0.090876			15.8	0.14947			15.8	-4.14559			15.8	-2.58851			15.8	-10.7524
	15.9	2.22015			15.9	7.21287			15.9	0.142447			15.9	0.308333			15.9	-3.9476			15.9	-1.59078			15.9	-11.6742
	16	2.86982			16	6.95418			16	0.0273843			16	-0.592028			16	-1.67056			16	-1.61267			16	-10.7544
	16.1	2.24337			16.1	6.783			16.1	-0.141487			16.1	-1.2689			16.1	-2.26482			16.1	-1.64352			16.1	-11.8228
	16.2	2.63999			16.2	6.90607			16.2	-0.0254753			16.2	-2.26907			16.2	-2.2562			16.2	-2.4203			16.2	-12.1074
	16.3	2.86222			16.3	7.08196			16.3	-0.276529			16.3	-2.91071			16.3	-4.1477			16.3	-1.67206			16.3	-12.0178
	16.4	2.90845			16.4	7.05115			16.4	-0.335475			16.4	-2.25146			16.4	-2.44557			16.4	-3.13921			16.4	-11.4989
	16.5	3.02013			16.5				16.5	-0.798892			16.5	-2.07171			16.5	-3.10817			16.5	-2.99624			16.5	-12.611
	16.6	2.91434			16.6	7.24359			16.6	-0.456594			16.6	-1.833			16.6	-2.489			16.6	-3.07516			16.6	-11.8701
	16.7	3.01545			16.7	7.21287			16.7	-0.321766			16.7	-1.04318			16.7	-2.89812			16.7	-3.26609			16.7	-10.7786
	16.8	2.34916			16.8	6.95418			16.8	-0.201655			16.8	-0.92764			16.8	-0.723943			16.8	-3.88135			16.8	-11.6515
	16.9	2.27986			16.9	6.783			16.9	0.429549			16.9	-0.660494			16.9	-1.76155			16.9	-5.02969			16.9	-11.6279
	17	3.05918			17	6.90607			17	-0.226262			17	-1.23804			17	-1.92618			17	-5.08495			17	-11.294
	17.1	2.85945			17.1	7.08196			17.1	0.0744838			17.1	-1.40838			17.1	-2.26357			17.1	-6.12826			17.1	-11.6936
	17.2	2.91051			17.2	7.05115			17.2	0.149684			17.2	-0.975194			17.2	-2.544			17.2	-6.31725			17.2	-11.7267
	17.3	2.51893			17.3				17.3	-0.60159			17.3	-0.481703			17.3	-3.05086			17.3	-5.89682			17.3	-11.2778
	17.4	2.55592			17.4	7.24359			17.4	-0.33086			17.4	-0.393959			17.4	-1.41219			17.4	-6.67443			17.4	-12.2704
	17.5	2.9737			17.5	7.21287			17.5	-0.622904			17.5	-0.223486			17.5	-2.25127			17.5	-6.55918			17.5	-11.1945
	17.6	3.02943			17.6	6.95418			17.6	-0.947312			17.6	-0.299111			17.6	-1.90034			17.6	-6.98501			17.6	-11.4388
	17.7	3.00089			17.7	6.783			17.7	-0.0328369			17.7	0.144506			17.7	-1.04092			17.7	-6.99184			17.7	-13.3829
	17.8	2.8263			17.8	6.90607			17.8	-0.163116			17.8	0.109776			17.8	-3.45755			17.8	-7.1759			17.8	-11.6429
	17.9	2.90589			17.9	7.08196			17.9	-0.572303			17.9	0.258637			17.9	-2.86932			17.9	-7.50829			17.9	-12.1302
	18	2.83865			18	7.05115			18	-0.814743			18	-0.441462			18	-1.56094			18	-8.16817			18	-12.5817
	18.1	3.22966			18.1				18.1	-0.181385			18.1	-0.728517			18.1	-2.15292			18.1	-7.6798			18.1	-11.5327
	18.2	2.36698			18.2				18.2	0.0612638			18.2	-1.37073			18.2	-1.39582			18.2	-8.02089			18.2	-12.0559
	18.3	3.13118			18.3				18.3	-0.633307			18.3	-1.37043			18.3	-2.70781			18.3	-7.30658			18.3	-11.6973
	18.4	3.12507			18.4	7.24359			18.4	-0.378849			18.4	-1.73598			18.4	-2.20732			18.4	-8.11456			18.4	-11.8935
	18.5	3.13438			18.5	7.21287			18.5	0.134227			18.5	-1.63477			18.5	-2.2757			18.5	-8.10354			18.5	-13.0278
	18.6	2.59462			18.6	6.95418			18.6	-0.906653			18.6	-1.68861			18.6	-1.36105			18.6	-7.04297			18.6	-11.682
	18.7	2.91008			18.7	6.783			18.7	-1.10493			18.7	-1.61027			18.7	-2.60673			18.7	-7.93852			18.7	-12.2787
	18.8	3.09454			18.8	6.90607			18.8	-0.658251			18.8	-1.43502			18.8	-0.675173			18.8	-8.12003			18.8	-12.5909
	18.9	2.92279			18.9	7.08196			18.9	-0.84649			18.9	-0.767389			18.9	-3.08687			18.9	-7.98504			18.9	-11.7628
	19	2.90028			19	7.05115			19	-0.190188			19	-0.11974			19	-1.58456			19	-7.76261			19	-12.8942
	19.1	3.16839			19.1	6.88428			19.1	0.286975			19.1	-0.368768			19.1	-2.12608			19.1	-7.6237			19.1	-12.0816
	19.2	2.87699			19.2	7.51641			19.2	-1.21815			19.2	-1.18255			19.2	-1.53565			19.2	-7.66718			19.2	-11.7398
	19.3	2.70971			19.3	7.00988			19.3	-0.448531			19.3	-1.28923			19.3	-1.46624			19.3	-8.52752			19.3	-11.2768
	19.4	3.2969			19.4	6.98948			19.4	-0.260879			19.4	-1.41566			19.4	-2.43323			19.4	-7.8956			19.4	-12.5071
	19.5	2.66299			19.5	6.98866			19.5	-0.620553			19.5	-0.52028			19.5	-1.12648			19.5	-7.77365			19.5	-12.0647
	19.6	2.64474			19.6	7.02813			19.6	-0.723591			19.6	0.216523			19.6	-2.79179			19.6	-7.80409			19.6	-11.8386
	19.7	3.7653			19.7	6.82545			19.7	-0.336163			19.7	0.171341			19.7	-3.80895			19.7	-7.69726			19.7	-12.3058
	19.8	3.53085			19.8	7.52735			19.8	-0.464335			19.8	0.267897			19.8	-2.9183			19.8	-8.33089			19.8	-12.5785
	19.9	2.93095			19.9	7.25777			19.9	-0.18145			19.9	-0.300532			19.9	-3.76429			19.9	-8.25573			19.9	-12.4668
	20	3.20531			20	6.46015			20	-0.80903			20	-1.47251			20	-3.63035			20	-7.08969			20	-11.2128
	20.1	3.60945			20.1	6.61472			20.1	-0.642003			20.1	-2.3127			20.1	-5.29275			20.1	-6.68176			20.1	-11.6553
	20.2	2.64616			20.2	7.0573			20.2	-0.465462			20.2	-2.28888			20.2	-6.13314			20.2	-7.98984			20.2	-11.4918
	20.3	2.43763			20.3	6.95118			20.3	-0.335497			20.3	-1.64165			20.3	-7.33993			20.3	-7.3328			20.3	-11.9736
	20.4	3.53192			20.4	7.07328			20.4	-0.635762			20.4	-1.52313			20.4	-6.72041			20.4	-7.6074			20.4	-11.7449
	20.5	3.43912			20.5	6.95995			20.5	-0.469062			20.5	-1.10277			20.5	-7.02975			20.5	-8.24959			20.5	-11.0829
	20.6	3.69118			20.6	7.20889			20.6	-0.434853			20.6	-0.625176			20.6	-7.3681			20.6	-8.44841			20.6	-11.4469
	20.7	3.22348			20.7	6.95488			20.7	-0.484485			20.7	0.0733515			20.7	-7.26688			20.7	-7.33711			20.7	-13.1515
	20.8	2.73477			20.8	6.86645			20.8	-0.427418			20.8	-0.397017			20.8	-7.6187			20.8	-8.87542			20.8	-13.9817
	20.9	3.02872			20.9	7.10996			20.9	-0.911351			20.9	-0.927813			20.9	-7.78705			20.9	-7.46915			20.9	-14.5243
	21	3.01744			21	7.38001			21	-0.639309			21	-1.17149			21	-7.79832			21	-8.19609			21	-15.8822
	21.1	3.20339			21.1	7.34167			21.1	-0.390374			21.1	-1.76881			21.1	-8.45394			21.1	-9.19211			21.1	-16.4833
	21.2	2.60051			21.2	8.10557			21.2	-1.56355			21.2	-1.74051			21.2	-8.94347			21.2	-7.7451			21.2	-16.8034
	21.3	3.18131			21.3	9.57305			21.3	-0.339269			21.3	-1.26396			21.3	-9.0835			21.3	-7.85857			21.3	-17.6465
	21.4	2.68486			21.4	10.2282			21.4	-0.529852			21.4	-1.06328			21.4	-8.9669			21.4	-8.84209			21.4	-18.1764
	21.5	3.02588			21.5	10.6494			21.5	-1.45466			21.5	-0.771947			21.5	-7.36732			21.5	-7.97527			21.5	-18.8264
	21.6	3.70467			21.6	11.5419			21.6	-3.01598			21.6	-0.764536			21.6	-10.0714			21.6	-7.51008			21.6	-18.6663
	21.7	2.82473			21.7	11.3809			21.7				21.7	-0.852625			21.7	-9.1493			21.7	-8.71455			21.7	-17.5877
	21.8	3.53448			21.8	11.984			21.8				21.8	-1.63245			21.8	-9.70502			21.8	-8.58908			21.8	-17.8685
	21.9	3.22476			21.9				21.9				21.9	-2.13519			21.9	-9.84028			21.9	-8.19371			21.9	-18.472
	22	3.48293			22				22	-2.83634			22	-2.49472			22	-10.4056			22	-8.54116			22	-17.1666
	22.1	3.37507			22.1				22.1	-2.99765			22.1	-3.00721			22.1	-9.87582			22.1	-7.74453			22.1	-17.2101
	22.2	3.9759			22.2				22.2	-2.4384			22.2	-2.11965			22.2	-9.19034			22.2	-8.46688			22.2	-18.7774
	22.3	3.00686			22.3				22.3	-1.86404			22.3	-1.14361			22.3	-10.1622			22.3	-8.98251			22.3	-18.4799
	22.4	3.27347			22.4				22.4	-1.75184			22.4	-0.510699			22.4	-10.1164			22.4	-7.67288			22.4	-18.5131
	22.5	2.92052			22.5				22.5	-1.76183			22.5	0.511589			22.5	-10.3307			22.5	-8.53756			22.5	-17.9582
	22.6	3.04058			22.6				22.6	-1.19658			22.6	0.110567			22.6	-9.81002			22.6	-7.79589			22.6	-18.7982
	22.7	4.03455			22.7				22.7	-1.08059			22.7	-0.127467			22.7	-9.89067			22.7	-8.10703			22.7	-17.0978
	22.8	4.50714			22.8				22.8	-2.29511			22.8	-1.32264			22.8	-9.07653			22.8	-7.98289			22.8	-18.595
	22.9	4.4083			22.9				22.9	-2.01123			22.9	-2.9916			22.9	-9.57954			22.9	-8.20059			22.9	-18.3286
	23	4.91775			23				23	-1.86141			23	-2.59201			23	-11.1465			23	-8.83997			23	-18.1203
	23.1	5.33382			23.1				23.1	-1.35108			23.1	-2.22297			23.1	-11.0328			23.1	-9.16788			23.1	-17.5708
	23.2	5.02198			23.2				23.2	-2.1626			23.2	-1.58752			23.2	-8.69004			23.2	-9.59389			23.2	-17.8956
	23.3	5.60704			23.3				23.3	-1.94324			23.3	-0.961569			23.3	-9.23464			23.3	-9.2776			23.3	-18.2105
	23.4	4.97235			23.4				23.4	-1.48407			23.4	-0.798092			23.4	-9.96989			23.4	-9.51919			23.4	-18.1593
	23.5	4.49223			23.5				23.5	-1.64347			23.5	-0.810274			23.5	-9.59469			23.5	-9.31669			23.5	-17.4052
	23.6	4.49663			23.6	11.1008			23.6	-2.48704			23.6	-1.82213			23.6	-10.5715			23.6	-10.241			23.6	-18.3719
	23.7	4.41405			23.7	11.1572			23.7	-1.92395			23.7	-2.98019			23.7	-10.5065			23.7	-9.47707			23.7	-18.3191
	23.8	4.68436			23.8	11.4482			23.8	-2.31008			23.8	-2.86693			23.8	-11.0111			23.8	-9.4346			23.8	-18.3119
	23.9	5.12713			23.9	11.3552			23.9	-1.80546			23.9	-2.2474			23.9	-9.85117			23.9	-9.60958			23.9	-18.9976
	24	5.11442			24	11.9649			24	-1.26451			24	-1.55168			24	-10.7838			24	-9.68212			24	-17.2819
	24.1	5.31337			24.1	11.8852			24.1	-1.10268			24.1	-1.03925			24.1	-9.67694			24.1	-9.80349			24.1	-17.8239
	24.2	5.04484			24.2	11.573			24.2	-1.44211			24.2	-0.528612			24.2	-11.0086			24.2	-9.45642			24.2	-17.6184
	24.3	5.37174			24.3	11.569			24.3	-2.09823			24.3	-0.356437			24.3	-11.631			24.3	-10.655			24.3	-18.5057
	24.4	5.61591			24.4	11.1253			24.4	-1.96535			24.4	-1.17121			24.4	-10.5431			24.4	-11.0084			24.4	-18.0832
	24.5	4.98925			24.5	11.5373			24.5	-1.96534			24.5	-1.53607			24.5	-10.43			24.5	-10.7497			24.5	-18.8037
	24.6	5.00607			24.6	11.7047			24.6	-1.56846			24.6	-1.01374			24.6	-10.4328			24.6	-10.0967			24.6	-18.6495
	24.7	4.85917			24.7	12.2615			24.7	-1.94696			24.7	-0.076016			24.7	-10.9708			24.7	-9.9549			24.7	-17.738
	24.8	4.8586			24.8	11.1973			24.8	-1.52617			24.8	0.308496			24.8	-9.02248			24.8	-10.868			24.8	-17.8417
	24.9	5.07353			24.9	11.4464			24.9	-1.48404			24.9	0.769313			24.9	-10.8075			24.9	-9.73736			24.9	-17.6847
	25	5.02986			25	11.7926			25	-1.40609			25	0.758974			25	-10.8544			25	-10.3326			25	-17.8646
	25.1	5.48974			25.1	11.7137			25.1	-2.02636			25.1	-0.0899678			25.1	-10.4783			25.1	-10.0347			25.1	-18.4042
	25.2	4.99514			25.2	11.461			25.2	-1.67082			25.2	-1.83775			25.2	-10.6807			25.2	-11.2914			25.2	-17.6107
	25.3	5.17669			25.3	11.2776			25.3	-1.94399			25.3	-2.5933			25.3	-9.73014			25.3	-9.86647			25.3	-17.8033
	25.4	5.42151			25.4	11.4231			25.4	-1.90025			25.4	-3.22775			25.4	-11.1552			25.4	-10.573			25.4	-18.7581
	25.5	5.38608			25.5	11.6934			25.5	-2.31228			25.5	-2.77613			25.5	-11.6293			25.5	-10.8459			25.5	-17.6176
	25.6	5.74485			25.6	11.353			25.6	-2.15441			25.6	-2.47208			25.6	-10.5983			25.6	-10.808			25.6	-18.4261
	25.7	4.90994			25.7	11.2412			25.7	-1.74797			25.7	-2.14536			25.7	-10.7058			25.7	-9.83119			25.7
	25.8	5.87117			25.8	11.6393			25.8	-2.06359			25.8	-1.61352			25.8	-10.0204			25.8	-10.0086			25.8
	25.9	5.08077			25.9	11.0749			25.9	-1.91534			25.9	-2.21255			25.9	-11.1874			25.9	-10.8102			25.9
	26	4.89623			26	11.3135			26	-1.2915			26	-2.4263			26	-11.6086			26	-11.6215			26
	26.1	5.34774			26.1	11.6614			26.1	-1.93194			26.1	-2.21055			26.1	-11.4395			26.1	-10.7064			26.1
	26.2	4.69877			26.2	11.1376			26.2	-2.15574			26.2	-2.39985			26.2	-10.6272			26.2	-10.6519			26.2	-20.4663
	26.3	5.56777			26.3	11.2057			26.3	-2.15131			26.3	-2.00422			26.3	-11.2239			26.3	-10.6994			26.3	-18.7247
	26.4	5.57693			26.4	11.4626			26.4	-1.5806			26.4	-2.51139			26.4	-13.0574			26.4	-10.7125			26.4	-20.4663
	26.5	5.56586			26.5	11.7711			26.5	-1.95731			26.5	-2.98446			26.5	-13.0714			26.5	-9.79159			26.5	-19.3633
	26.6	5.73804			26.6	11.5007			26.6	-1.58514			26.6	-2.98335			26.6	-12.4533			26.6	-9.98411			26.6	-18.1441
	26.7	6.00969			26.7	11.8523			26.7	-1.78623			26.7	-3.43051			26.7	-12.2843			26.7	-10.1867			26.7	-20.0018
	26.8	5.38345			26.8	11.1916			26.8	-1.45531			26.8	-2.98303			26.8	-13.4703			26.8	-10.698			26.8	-19.8161
	26.9	5.5011			26.9	11.2279			26.9	-2.2401			26.9	-2.65566			26.9	-13.8533			26.9	-9.77344			26.9	-19.8857
	27	5.09589			27	11.6369			27	-1.79832			27	-2.14137			27	-13.2638			27	-11.0173			27	-19.8277
	27.1	5.245			27.1	11.3727			27.1	-1.74099			27.1	-2.57536			27.1	-13.753			27.1	-10.4867			27.1	-19.8741
	27.2	5.8488			27.2	11.1747			27.2	-2.17696			27.2	-3.19849			27.2	-12.4037			27.2	-10.8446			27.2	-19.3052
	27.3	5.22398			27.3	10.9744			27.3	-1.03176			27.3	-4.0355			27.3	-13.2822			27.3	-10.9671			27.3	-19.8161
	27.4	6.11733			27.4	11.0664			27.4	-1.4018			27.4	-4.4716			27.4	-12.2493			27.4	-9.48242			27.4	-19.6535
	27.5	5.73385			27.5	11.1811			27.5	-1.55096			27.5	-4.61424			27.5	-14.0758			27.5	-11.0914			27.5	-19.3052
	27.6	5.81195			27.6	11.4167			27.6	-1.71807			27.6	-4.2457			27.6	-14.5518			27.6	-10.5462			27.6	-19.5955
	27.7	6.00039			27.7	11.5951			27.7	-1.69624			27.7	-3.80551			27.7	-13.9994			27.7	-10.5982			27.7	-19.0149
	27.8	5.74208			27.8	11.7916			27.8	-1.54496			27.8	-2.73594			27.8	-14.6455			27.8	-10.6742			27.8	-19.5955
	27.9	5.92321			27.9	11.1605			27.9	-2.41397			27.9	-2.11602			27.9	-13.2907			27.9	-9.97757			27.9	-18.7247
	28	5.7036			28	11.4547			28	-1.85503			28	-2.03976			28	-14.8477			28	-9.72162			28	-20.4663
	28.1	5.55705			28.1	11.2169			28.1	-1.71344			28.1	-2.03338			28.1	-14.5264			28.1	-10.8694			28.1	-18.7247
	28.2	5.06117			28.2	11.5515			28.2	-1.84092			28.2	-2.46765			28.2	-14.3053			28.2	-11.06			28.2	-20.4663
	28.3	5.52695			28.3	11.7596			28.3	-2.27144			28.3	-2.32004			28.3	-14.0238			28.3	-11.5657			28.3	-19.3633
	28.4	6.00089			28.4	11.7739			28.4	-1.62442			28.4	-3.27934			28.4	-15.8504			28.4	-11.0482			28.4	-18.1441
	28.5	6.21581			28.5	12.4081			28.5	-1.66739			28.5	-3.59811			28.5	-13.3463			28.5	-11.1147			28.5	-20.0018
	28.6	5.68755			28.6	12.9344			28.6	-2.01784			28.6	-2.66615			28.6	-14.7536			28.6	-11.0535
	28.7	5.7658			28.7	12.8364			28.7	-1.93442			28.7	-2.23459			28.7	-14.0949			28.7	-11.203
	28.8	6.09404			28.8	13.3153			28.8	-1.86888			28.8	-2.45182			28.8	-14.5937			28.8	-10.7062
	28.9	6.06841			28.9	13.9367			28.9	-2.66557			28.9	-2.23568			28.9	-13.829			28.9	-10.6356
	29	6.01076			29	13.9521			29	-2.29204			29	-2.69827			29	-13.9041			29	-12.237
	29.1	5.84475			29.1	13.2685			29.1	-1.94178			29.1	-3.07548			29.1	-14.6384			29.1	-10.4338
	29.2	5.92442			29.2	13.3317			29.2	-1.80595			29.2	-3.54424			29.2	-15.3707			29.2	-10.5124
	29.3	6.15979			29.3	13.8547			29.3	-1.90104			29.3	-3.22434			29.3	-14.8049			29.3	-10.3575
	29.4	5.83858			29.4	13.4205			29.4	-1.92488			29.4	-2.19187			29.4	-15.0585			29.4	-10.5738
	29.5	5.85675			29.5	14.0644			29.5	-1.85993			29.5	-1.72552			29.5	-14.1689			29.5	-10.5149
	29.6	5.90276			29.6	14.9316			29.6	-2.68443			29.6	-2.0901			29.6	-14.4307			29.6	-9.93952
	29.7	6.36584			29.7	15.1188			29.7	-1.65716			29.7	-2.48085			29.7	-12.637			29.7	-10.2145
	29.8	6.65873			29.8	14.8825			29.8	-1.34746			29.8	-2.49426			29.8	-13.9298			29.8	-10.1793
	29.9	6.51473			29.9	15.1233			29.9	-1.94849			29.9	-3.09527			29.9	-13.6413			29.9	-10.7657
	30	7.649			30	15.4979			30	-1.33968			30	-3.02043			30	-14.6565			30	-11.8949
	30.1	7.65915			30.1	15.0899			30.1	-1.72457			30.1	-2.92031			30.1	-13.261			30.1	-12.0417
	30.2	7.78028			30.2	15.6109			30.2	-1.98709			30.2	-2.77703			30.2	-14.251			30.2	-11.4941
	30.3	7.73946			30.3	15.6944			30.3	-2.78973			30.3	-2.8245			30.3	-14.5597			30.3	-12.2178
	30.4	8.46567			30.4	15.8262			30.4	-2.18559			30.4	-3.56668			30.4	-14.921			30.4	-11.7013
	30.5	8.58552			30.5	15.431			30.5	-2.16637			30.5	-3.65092			30.5	-15.4175			30.5	-10.7731
	30.6	8.43748			30.6	15.3562			30.6	-2.35112			30.6	-3.56498			30.6	-14.2905			30.6	-11.8848
	30.7	8.60171			30.7	15.4747			30.7	-2.69617			30.7	-3.90392			30.7	-15.3344			30.7	-12.1428
	30.8	9.2386			30.8	15.5048			30.8	-2.05411			30.8	-3.29631			30.8	-14.4645			30.8	-11.852
	30.9	9.20012			30.9	15.2432			30.9	-3.14017			30.9	-3.30419			30.9	-13.3113			30.9	-11.8044
	31	8.93152			31	14.787			31	-2.45486			31	-2.93852			31	-15.0264			31	-11.3334
	31.1	9.14353			31.1	15.2265			31.1	-1.56515			31.1	-3.11473			31.1	-14.18			31.1	-12.281
	31.2	8.68784			31.2	15.5905			31.2	-2.24284			31.2	-3.0756			31.2	-13.4342			31.2	-11.767
	31.3	8.9438			31.3	16.1046			31.3	-2.34035			31.3	-3.12532			31.3	-15.9542			31.3	-11.9469
	31.4	9.32359			31.4	16.1479			31.4	-2.10145			31.4	-3.27778			31.4	-14.8474			31.4	-12.3898
	31.5	9.88678			31.5	16.2415			31.5	-1.17235			31.5	-3.01948			31.5	-15.3641			31.5	-12.0022
	31.6	9.35597			31.6	15.1775			31.6	-2.78017			31.6	-3.16575			31.6	-15.6597			31.6	-12.9116
	31.7	9.47433			31.7	15.9376			31.7	-2.09571			31.7	-3.82134			31.7	-15.5568			31.7	-11.9449
	31.8	9.98484			31.8	15.357			31.8	-2.12983			31.8	-3.33127			31.8	-14.3304			31.8	-12.3398
	31.9	10.3249			31.9	15.3202			31.9	-2.52482			31.9	-3.72431			31.9	-14.8975			31.9	-12.6859
	32	10.1733			32	15.5685			32	-2.35228			32	-3.71135			32	-15.7257			32	-11.78
	32.1	9.55598			32.1	15.501			32.1	-2.42515			32.1	-3.34484			32.1	-14.4188			32.1	-12.2403
	32.2	9.95203			32.2	15.3527			32.2	-2.30466			32.2	-3.39354			32.2	-16.4401			32.2	-12.4296
	32.3	9.8821			32.3	15.4377			32.3	-2.63129			32.3	-3.92936			32.3	-12.6907			32.3	-11.3386
	32.4	9.9504			32.4	15.5067			32.4				32.4	-4.29936			32.4	-13.8381			32.4	-10.7345
	32.5	10.2148			32.5	15.7324			32.5				32.5	-3.55871			32.5	-15.1593			32.5	-11.8909
	32.6	10.3502			32.6	15.0554			32.6				32.6	-2.59243			32.6	-14.9834			32.6	-12.8628
	32.7	9.45644			32.7	15.4634			32.7				32.7	-2.65768			32.7	-15.3679			32.7	-11.4943
	32.8	10.2571			32.8	15.1171			32.8				32.8	-2.59611			32.8	-13.6442			32.8	-12.1545
	32.9	10.3056			32.9	15.1035			32.9				32.9	-2.40008			32.9	-14.6827			32.9	-12.81
	33	10.2023			33	15.3962			33				33	-3.29817			33	-13.9759			33	-12.6681
	33.1	10.2822			33.1	16.1119			33.1	-6.55625			33.1	-4.05211			33.1	-15.0962			33.1	-12.0445
	33.2	10.0454			33.2	16.212			33.2	-5.73812			33.2	-3.76226			33.2	-15.5851			33.2	-12.6797
	33.3	10.124			33.3	16.0481			33.3	-5.58483			33.3	-3.56845			33.3	-16.0554			33.3	-11.9704
	33.4	10.0142			33.4	15.7378			33.4	-5.80529			33.4	-3.57637			33.4	-15.7765			33.4	-13.1239
	33.5	10.3139			33.5	15.4332			33.5	-6.00868			33.5	-3.78011			33.5	-16.8984			33.5	-12.2972
	33.6	10.2177			33.6	16.0384			33.6	-5.32526			33.6	-3.62986			33.6	-16.2902			33.6	-12.4267
	33.7	9.89616			33.7	14.8227			33.7	-5.25231			33.7	-2.91738			33.7	-15.733			33.7	-12.5256
	33.8	10.9299			33.8	16.1505			33.8	-5.12412			33.8	-2.62816			33.8	-16.0906			33.8	-12.4937
	33.9	11.0199			33.9	15.7176			33.9	-5.85695			33.9	-2.14666			33.9	-16.9361			33.9	-12.6842
	34	10.1767			34	15.4726			34	-5.30202			34	-2.91801			34	-16.8787			34	-11.7216
	34.1	10.7022			34.1	15.6316			34.1	-5.97874			34.1	-3.01749			34.1	-16.1274			34.1	-12.6651
	34.2	10.7527			34.2	15.3841			34.2	-5.22717			34.2	-3.01661			34.2	-15.8513			34.2	-11.0943
	34.3	11.2441			34.3	15.6244			34.3	-5.4035			34.3	-2.76752			34.3	-17.1872			34.3	-13.3483
	34.4	11.1998			34.4	15.6457			34.4	-5.65007			34.4	-2.54708			34.4	-16.3498			34.4	-12.191
	34.5	11.048			34.5	15.1105			34.5	-5.57228			34.5	-2.25272			34.5	-17.421			34.5	-13.1294
	34.6	11.4418			34.6	15.7253			34.6	-5.18456			34.6	-2.61106			34.6	-16.9678			34.6	-13.3723
	34.7	10.6597			34.7	15.3912			34.7	-5.27389			34.7	-2.42029			34.7	-17.4125			34.7	-12.2879
	34.8	10.4424			34.8	14.8605			34.8	-5.99826			34.8	-3.68249			34.8	-17.0684			34.8	-12.259
	34.9	11.0765			34.9	15.349			34.9	-5.2716			34.9	-3.13182			34.9	-16.4432			34.9	-13.122
	35	10.6545			35	15.3864			35	-5.06966			35	-3.00027			35	-17.5318			35	-11.996
	35.1	11.1522			35.1	15.5712			35.1	-5.8649			35.1	-2.65229			35.1	-16.9615			35.1	-12.4851
	35.2	11.106			35.2	15.7843			35.2	-5.55911			35.2	-2.52023			35.2	-16.0164			35.2	-13.0597
	35.3	11.4532			35.3	14.9761			35.3	-5.44166			35.3	-2.05309			35.3	-18.2252			35.3	-12.2362
	35.4	11.072			35.4	15.493			35.4	-5.33849			35.4	-1.57195			35.4	-18.3087			35.4	-11.5708
	35.5	11.3174			35.5	15.5265			35.5	-5.19057			35.5	-1.04798			35.5	-16.7548			35.5	-12.1487
	35.6	10.7774			35.6	15.4338			35.6	-5.06872			35.6	-1.79508			35.6	-15.5122			35.6	-12.201
	35.7	11.2125			35.7	15.749			35.7	-4.63389			35.7	-1.99296			35.7	-16.4369			35.7	-12.5438
	35.8	11.3499			35.8	15.7167			35.8	-5.09979			35.8	-2.1403			35.8	-17.773			35.8	-12.2603
	35.9	11.1474			35.9	15.282			35.9	-4.85864			35.9	-3.29027			35.9	-16.9268			35.9	-12.3087
	36	11.3283			36	15.0763			36	-5.2016			36	-3.95707			36	-17.1683			36	-12.662
	36.1	11.477			36.1	15.9714			36.1	-5.34834			36.1	-4.07567			36.1	-17.5391			36.1	-11.9508
	36.2	11.7918			36.2	16.0136			36.2	-5.32114			36.2	-4.19611			36.2	-17.6496			36.2	-12.5599
	36.3	12.0423			36.3	15.9217			36.3	-4.9613			36.3	-4.23642			36.3	-16.9926			36.3	-11.528
	36.4	11.1713			36.4	15.4871			36.4	-5.85921			36.4	-4.76834			36.4	-17.067			36.4	-12.1645
	36.5	11.5434			36.5	15.8978			36.5	-5.69527			36.5	-3.32831			36.5	-17.5905			36.5	-12.247
	36.6	11.3878			36.6	16.0246			36.6	-5.88046			36.6	-2.24602			36.6	-18.4442			36.6	-12.3584
	36.7	11.6076			36.7	15.8211			36.7	-5.02379			36.7	-2.64106			36.7	-16.7806			36.7	-12.0189
	36.8	11.685			36.8	16.0938			36.8	-5.54327			36.8	-2.36132			36.8	-17.3383			36.8	-11.9462
	36.9	11.2564			36.9	16.592			36.9	-5.04419			36.9	-2.33596			36.9	-17.1084			36.9	-12.1738
	37	11.1347			37	16.5362			37	-5.61791			37	-3.06558			37	-18.1265
	37.1	11.8526			37.1	16.5004			37.1	-5.04882			37.1	-3.36054			37.1	-18.2292
	37.2	10.5271			37.2	16.0193			37.2	-5.01893			37.2	-3.75097			37.2	-16.1001
	37.3	11.8773			37.3	16.5536			37.3	-5.12362			37.3	-2.49913			37.3	-17.9435
	37.4	11.6555			37.4	16.1019			37.4	-5.51484			37.4	-2.03205			37.4	-16.895
	37.5	11.8342			37.5	16.4953			37.5	-5.05698			37.5	-2.21705			37.5	-19.3189
	37.6	11.6871			37.6	16.5811			37.6	-5.23238			37.6	-2.22071			37.6	-17.3767
	37.7	11.7304			37.7	16.2702			37.7	-4.66085			37.7	-2.69004			37.7	-17.8401
	37.8	11.4693			37.8	16.0534			37.8	-5.77375			37.8	-3.11123			37.8	-17.9391
	37.9	12.0051			37.9	15.9651			37.9	-5.8069			37.9	-3.10281			37.9	-17.0847
	38	11.5294			38	16.314			38	-4.86887			38	-3.38462			38	-16.9404
	38.1	11.5183			38.1	16.1755			38.1	-5.31829			38.1	-3.51903			38.1	-19.3337
	38.2	11.6831			38.2	16.7805			38.2	-5.11785			38.2	-3.73185			38.2	-16.6794
	38.3	11.5249			38.3	16.011			38.3	-5.02846			38.3	-4.23734			38.3	-17.5008
	38.4	11.7004			38.4	16.3058			38.4	-4.90839			38.4	-3.9202			38.4	-18.4726
	38.5	11.5157			38.5	16.2509			38.5	-4.92746			38.5	-4.62751			38.5	-17.6597
	38.6	12.2346			38.6	16.1481			38.6	-5.16511			38.6	-4.1387			38.6	-17.4734
	38.7	12.1797			38.7	16.2729			38.7	-5.18726			38.7	-4.66747			38.7	-16.7126
	38.8	11.2346			38.8	16.7937			38.8	-4.5041			38.8	-4.31714			38.8	-17.5413
	38.9	10.9402			38.9	16.1073			38.9	-4.2769			38.9	-4.26453			38.9	-18.2823
	39	11.4419			39	16.9081			39	-4.47171			39	-4.38614			39	-17.1685
	39.1	11.209			39.1	17.0787			39.1	-4.47171			39.1	-4.62698			39.1	-17.1727
	39.2	12.0113			39.2	16.6906			39.2	-5.28186			39.2	-3.84175			39.2	-17.4709
	39.3	12.1716			39.3	16.3574			39.3	-4.18179			39.3	-4.03596			39.3	-17.237
	39.4	11.6761			39.4	16.4536			39.4	-5.32087			39.4	-4.06071
	39.5	11.5993			39.5	16.1683			39.5	-5.27997			39.5	-4.08981
	39.6	12.187			39.6	16.4973			39.6	-4.94275			39.6	-2.42591
	39.7	12.0323			39.7	16.4311			39.7	-4.25434			39.7	-1.86361
	39.8	12.1706			39.8	16.4225			39.8	-4.15662			39.8	-1.10104
	39.9	12.0485			39.9	16.3983			39.9	-4.24618			39.9	-1.17119
	40	11.2441			40	16.4379			40	-5.33473			40	-1.228
	40.1	11.5932			40.1	16.2359			40.1	-4.5054			40.1	-1.85572
	40.2	11.4861			40.2	16.611			40.2	-4.17657			40.2	-2.77002
	40.3	11.4349			40.3	16.1188			40.3	-4.79597			40.3	-2.50679
	40.4	11.7654			40.4	16.1481			40.4	-4.35327			40.4	-2.72341
	40.5	11.8694			40.5	16.6305			40.5	-4.58378			40.5	-3.06849
	40.6	11.6533			40.6	16.4756			40.6	-4.48572			40.6	-2.95813
	40.7	11.9278			40.7	16.9077			40.7	-5.38178			40.7	-2.48877
	40.8	11.5979			40.8	16.0971			40.8	-4.89344			40.8	-2.92152
	40.9	12.5509			40.9	16.4293			40.9	-4.76419			40.9	-3.13992
	41	11.4753			41	16.3955			41	-4.98824			41	-2.9168
	41.1	11.6755			41.1	16.2633			41.1	-5.07001			41.1	-2.48696
	41.2	12.3572			41.2	16.6212			41.2	-4.79276			41.2	-2.15937
	41.3	12.0946			41.3	16.1118			41.3	-5.12909			41.3	-2.75298
	41.4	12.6837			41.4	15.9921			41.4	-4.72338			41.4	-2.70112
	41.5	12.5553			41.5	15.9482			41.5	-4.71456			41.5	-2.32241
	41.6	11.6917			41.6	15.7304			41.6	-4.7928			41.6	-3.39185
	41.7	12.2017			41.7	16.5956			41.7	-4.74278			41.7	-4.20141
	41.8	13.075			41.8	16.5553			41.8	-4.79298			41.8	-5.10147
	41.9	12.8158			41.9	16.5058			41.9	-5.21882			41.9	-5.41772
	42	13.3599			42	15.9898			42	-5.07668			42	-5.27243
	42.1	12.8452			42.1	16.557			42.1	-5.04146			42.1	-6.06095
	42.2	12.5279			42.2	16.7081			42.2	-4.97529			42.2	-4.79255
	42.3	12.6244			42.3	16.3948			42.3	-4.8739			42.3	-3.88741
	42.4	12.9917			42.4	15.8979			42.4	-5.8063			42.4	-3.04928
	42.5	12.6322			42.5	16.3597			42.5	-5.12926			42.5	-2.37325
	42.6	13.4177			42.6	16.0089			42.6	-4.8771			42.6	-2.52906
	42.7	12.9247			42.7	15.9537			42.7	-4.74871			42.7	-2.48588
	42.8	12.7873			42.8	16.1882			42.8	-5.29486			42.8	-3.45452
	42.9	12.9407			42.9	16.8279			42.9	-5.9081			42.9	-4.16845
	43	13.037			43	16.3653			43	-5.12314			43	-4.51642
	43.1	13.4233			43.1	16.0741			43.1	-5.1544			43.1	-5.01792
	43.2	13.0041			43.2	15.693			43.2	-5.27284			43.2	-4.42345
	43.3	12.4529			43.3	16.7557			43.3	-4.74371			43.3	-3.45978
	43.4	13.035			43.4	16.5626			43.4	-4.52192			43.4	-2.8988
	43.5	12.7924			43.5	16.2778			43.5	-4.54112			43.5	-2.33153
	43.6	12.6778			43.6	16.6726			43.6	-5.35576			43.6	-2.06136
	43.7	12.4738			43.7	16.7626			43.7	-5.00401			43.7	-1.66531
	43.8	13.0698			43.8	16.2875			43.8	-5.6012			43.8	-1.98362
	43.9	13.2377			43.9	16.288			43.9	-4.36807			43.9	-2.7619
	44	13.1197			44	16.6642			44	-5.37336			44	-2.70226
	44.1	13.1326			44.1	16.5563			44.1	-5.53919			44.1	-2.54653
	44.2	13.4858			44.2	16.6867			44.2	-5.27863			44.2	-3.43896
	44.3	13.9182			44.3	17.3987			44.3	-4.63429			44.3	-3.78656
	44.4	13.1252			44.4	16.2193			44.4	-5.38717			44.4	-4.72693
	44.5	12.8999			44.5	16.2298			44.5	-5.51791			44.5	-5.18769
	44.6	12.7643			44.6	16.2849			44.6	-5.48045			44.6	-5.31945
	44.7	12.7182			44.7	15.9744			44.7	-5.32587			44.7	-5.68737
	44.8	12.4393			44.8	16.4648			44.8	-5.41937			44.8	-4.42552
	44.9	13.2371			44.9	16.237			44.9	-5.42247			44.9	-3.70283
	45	13.2337			45	16.5126			45	-5.39956			45	-4.06605
	45.1	13.8108			45.1	15.9273			45.1	-5.99573			45.1	-3.90014
	45.2	13.5663			45.2	15.6037			45.2	-5.40773			45.2	-4.35719
	45.3	13.6007			45.3	16.1543			45.3	-5.85383			45.3	-4.2382
	45.4	13.6173			45.4	16.6755			45.4	-5.20772			45.4	-4.07739
	45.5	14.0154			45.5	16.2766			45.5	-5.14548			45.5	-4.15779
	45.6	13.7674			45.6	16.298			45.6	-5.76474			45.6	-2.87326
	45.7	13.1162			45.7	15.8643			45.7	-5.62617			45.7	-3.71092
	45.8	13.0373			45.8	16.477			45.8	-5.04033			45.8	-4.401
	45.9	13.946			45.9	16.0558			45.9	-6.0752			45.9	-4.85178
	46	12.782			46	17.2295			46	-5.05762			46	-4.84221
	46.1	13.4376			46.1	16.8284			46.1	-5.32127			46.1	-4.36564
	46.2	13.3094			46.2	16.1222			46.2	-5.38651			46.2	-4.01891
	46.3	13.4287			46.3	16.2704			46.3	-5.7733			46.3	-3.4422
	46.4	13.2891			46.4	15.8565			46.4	-6.06002			46.4	-3.25321
	46.5	13.8148			46.5	16.4469			46.5	-5.05078			46.5	-3.81808
	46.6	14.1299			46.6	16.5287			46.6	-5.66357			46.6	-3.88378
	46.7	13.4984			46.7	16.6951			46.7	-5.75776			46.7	-4.51706
	46.8	14.0284			46.8	16.2792			46.8	-5.72521			46.8	-5.37262
	46.9	14.0422			46.9	15.994			46.9	-5.58993			46.9	-5.83521
	47	13.4669			47	16.2403			47	-5.54951			47	-5.82631
	47.1	14.3019			47.1	16.7972			47.1	-6.27407			47.1	-5.90363
	47.2	13.4619			47.2	16.6333			47.2	-5.14918			47.2	-5.69735
	47.3	13.5361			47.3	16.1316			47.3	-5.51735			47.3	-4.98178
	47.4	13.5916			47.4	16.0123			47.4	-6.49337			47.4	-4.36879
	47.5	14.1771			47.5	16.8342			47.5	-8.49033			47.5	-4.85745
	47.6	14.0181			47.6	16.2346			47.6	-10.5223			47.6	-5.11
	47.7	14.0769			47.7	16.5941			47.7	-11.5467			47.7	-5.69996
	47.8	14.2556			47.8	16.2817			47.8	-12.0202			47.8	-5.51914
	47.9	14.0062			47.9	16.5434			47.9	-12.3776			47.9	-5.53734
	48	14.12			48	16.5564			48	-12.0046			48	-4.3114
	48.1	13.546			48.1	16.5539			48.1	-12.858			48.1	-3.56015
	48.2	13.9214			48.2	16.2631			48.2	-13.1991			48.2	-2.27217
	48.3	14.0566			48.3	16.5758			48.3	-12.8891			48.3	-2.78126
	48.4	13.6704			48.4	15.718			48.4	-12.8167			48.4	-1.97936
	48.5	13.8102			48.5	16.3453			48.5	-13.2244			48.5	-2.66337
	48.6	13.9292			48.6	16.516			48.6	-12.9646			48.6	-3.52292
	48.7	13.9655			48.7	16.3054			48.7	-12.7866			48.7	-4.04072
	48.8	14.582			48.8	16.0678			48.8	-13.0245			48.8	-4.79066
	48.9	13.9518			48.9	16.089			48.9	-12.9886			48.9	-5.83685
	49	14.213			49	15.8055			49	-12.9497			49	-5.26791
	49.1	13.6773			49.1	16.5979			49.1	-13.0211			49.1	-5.61238
	49.2	13.4674			49.2	16.5595			49.2	-13.462			49.2	-4.49813
	49.3	14.043			49.3	15.9898			49.3	-12.9153			49.3	-3.90348
	49.4	13.4806			49.4	16.025			49.4	-13.4796			49.4	-3.81502
	49.5	14.0433			49.5	16.4317			49.5	-13.3591			49.5	-3.57396
	49.6	13.9226			49.6	16.449			49.6	-13.0661			49.6	-4.39865
	49.7	14.1329			49.7	16.8071			49.7	-13.3143			49.7	-4.69741
	49.8	14.1782			49.8	16.9598			49.8	-12.799			49.8	-3.99852
	49.9	13.6883			49.9	16.2141			49.9	-13.2376			49.9	-4.00529
	50	14.1322			50	16.1818			50	-13.3056			50	-4.29913
	50.1	14.7489			50.1	15.7572			50.1	-12.8325			50.1	-4.35998
	50.2	14.0406			50.2	15.7744			50.2	-13.1032			50.2	-4.98988
	50.3	14.3475			50.3	16.4074			50.3	-13.0624			50.3	-5.39877
	50.4	13.9062			50.4	16.4566			50.4	-13.3007			50.4	-5.27073
	50.5	14.0227			50.5	16.8691			50.5	-12.7015			50.5	-4.23801
	50.6	14.2248			50.6	16.0268			50.6	-13.4947			50.6	-3.81565
	50.7	14.3623			50.7	16.116			50.7	-13.7129			50.7	-3.6284
	50.8	14.5127			50.8	15.9103			50.8	-13.9224			50.8	-4.00046
	50.9	14.0139							50.9	-13.7497			50.9	-3.86377
	51	14.729							51	-13.3225			51	-4.64514
	51.1	14.5723							51.1	-13.4143			51.1	-5.12769
	51.2	14.7826							51.2	-13.0459			51.2	-5.14543
	51.3	14.2114							51.3	-14.0367			51.3	-5.48195
	51.4	14.3519							51.4	-13.0791			51.4	-6.1295
	51.5	14.352							51.5	-13.7493			51.5	-6.11814
	51.6	14.3457							51.6	-13.2022			51.6	-5.53675
	51.7	14.2223							51.7	-13.1927			51.7	-5.02048
	51.8	14.6786							51.8	-13.8553			51.8	-4.20957
	51.9	14.896							51.9	-13.8929			51.9	-4.08336
	52	14.4							52	-13.9533			52	-4.4999
	52.1	14.9537							52.1	-13.3953			52.1	-4.60857
	52.2	14.7387							52.2	-13.8593			52.2	-4.96814
	52.3	14.9861							52.3	-13.5468			52.3	-4.8661
	52.4	14.2433							52.4	-13.2212			52.4	-4.81191
	52.5	14.004							52.5	-13.9636			52.5	-5.1767
	52.6	14.3452							52.6	-13.25			52.6	-4.70575
	52.7	14.7422							52.7	-13.8617			52.7	-4.68039
	52.8	14.9924							52.8	-13.6184			52.8	-4.61667
	52.9	15.1513							52.9	-13.7327			52.9	-3.49238
	53	14.8171							53	-13.2704			53	-3.35774
	53.1	14.6278							53.1	-13.5815			53.1	-2.90743
	53.2	15.1397							53.2	-13.4793			53.2	-3.43384
	53.3	15.3757							53.3	-12.9354			53.3	-4.20113
	53.4	15.3468							53.4	-13.7319			53.4	-5.51594
	53.5	14.62							53.5	-13.6245			53.5	-6.45791
	53.6	14.97							53.6	-12.9014			53.6	-6.39331
	53.7	15.1518							53.7	-13.4764			53.7	-5.77843
	53.8	14.7171							53.8	-13.6148			53.8	-5.41383
	53.9	14.4637							53.9	-12.8116			53.9	-4.75257
	54	14.6663							54	-13.1002			54	-4.53036
	54.1	15.618							54.1	-13.6264			54.1	-4.8307
	54.2	14.8983							54.2	-14.0596			54.2	-5.66659
	54.3	14.9263							54.3	-13.6956			54.3	-6.04611
	54.4	14.7514							54.4	-13.3866			54.4	-5.42329
	54.5	14.437							54.5	-13.8204			54.5	-5.59149
	54.6	15.1049							54.6	-13.5979			54.6	-5.71326
	54.7	14.7076							54.7	-13.5123			54.7	-6.34394
	54.8	14.7968							54.8	-13.6221			54.8	-6.06443
	54.9	14.3778							54.9	-13.8781			54.9	-6.65861
	55	14.6075							55	-13.8336			55	-6.20942
	55.1	14.7174							55.1	-14.5165			55.1	-5.41055
	55.2	14.9428							55.2	-13.5359			55.2	-4.43264
	55.3	14.6484							55.3	-14.2838			55.3	-4.17796
	55.4	15.3882							55.4	-13.4388			55.4	-4.48488
	55.5	15.385							55.5	-13.3944			55.5	-5.36072
	55.6	15.3057							55.6	-13.8814			55.6	-5.48318
	55.7	14.4167							55.7	-13.9782			55.7	-6.14459
	55.8	14.3526							55.8	-14.2794			55.8	-5.79799
	55.9	14.5412							55.9	-14.1141			55.9	-5.53411
	56	14.3823							56	-13.3215			56	-4.81175
	56.1	14.8026							56.1	-14.0935			56.1	-4.99883
	56.2	15.0924							56.2	-14.2284			56.2	-5.40133
	56.3	14.7904							56.3	-14.5059			56.3	-6.48262
	56.4	14.6937							56.4	-13.7198			56.4	-6.72089
	56.5	14.9263							56.5	-13.4107			56.5	-6.73154
	56.6	15.3755							56.6	-14.1125			56.6	-6.3721
	56.7	15.5866							56.7	-13.6348			56.7	-6.13994
	56.8	15.4648							56.8	-13.1108			56.8	-5.19861
	56.9	14.7771							56.9	-14.2992			56.9	-4.37164
	57	15.0374							57	-14.1909			57	-4.38033
	57.1	15.1922							57.1	-13.5998			57.1	-5.07722
	57.2	14.4811							57.2	-14.2544			57.2	-4.68623
	57.3	14.8825							57.3	-13.6416			57.3	-4.44631
	57.4	15.3191							57.4	-14.1409			57.4	-4.95629
	57.5	15.6797							57.5	-13.95			57.5	-6.49117
	57.6	14.8							57.6	-14.7926			57.6	-6.46843
	57.7	15.4378							57.7	-14.224			57.7	-6.19354
	57.8	15.2654							57.8	-14.0081			57.8	-6.87422
	57.9	15.3866							57.9	-14.1302			57.9	-6.41964
	58	15.2223							58	-13.6799			58	-5.70645
	58.1	15.5454							58.1	-14.191			58.1	-5.17887
	58.2	15.3817							58.2	-14.3155			58.2	-5.3167
	58.3	14.7896							58.3	-14.127			58.3	-6.24333
	58.4	14.8606							58.4	-13.4318			58.4	-6.08982
	58.5	15.5211							58.5	-13.919			58.5	-5.73619
									58.6	-13.9327			58.6	-6.1258
									58.7	-14.7939			58.7	-5.79023
									58.8	-13.4915			58.8	-5.79219
									58.9	-13.8015			58.9	-6.24331
									59	-13.8199			59	-5.9089
									59.1	-13.6484			59.1	-6.2204
									59.2	-14.5088			59.2	-6.97803
									59.3	-13.5643			59.3	-6.34871
									59.4	-14.0562			59.4	-6.59669
									59.5	-14.0387			59.5	-6.4088
									59.6	-14.1951			59.6	-5.56907
									59.7	-13.4821			59.7	-5.25319
									59.8	-14.0663			59.8	-4.89948
									59.9	-13.9717			59.9	-5.33836
									60	-13.876			60	-6.58311
									60.1	-14.3553			60.1	-6.43938
									60.2	-14.2127			60.2	-6.34912
									60.3	-14.341			60.3	-6.82831
									60.4	-14.5357			60.4	-6.24709
									60.5	-13.9087			60.5	-5.94023
									60.6	-14.1624			60.6	-5.6835
									60.7	-14.376			60.7	-5.33106
									60.8	-14.0297			60.8	-5.65566
									60.9	-14.1157			60.9	-5.05231
									61	-14.2963			61	-5.15077
									61.1	-13.4329			61.1	-6.10289
									61.2	-14.6808			61.2	-6.8501
									61.3	-14.2066			61.3	-7.14333
									61.4	-14.4011			61.4	-6.54283
									61.5	-13.9331			61.5	-6.45774
									61.6	-13.7833			61.6	-6.2126
									61.7	-14.0027			61.7	-4.78951
									61.8	-13.9031			61.8	-4.68037
									61.9	-14.0787			61.9	-4.7644
									62	-13.7999			62	-5.14706
									62.1	-14.4082			62.1	-5.60062
									62.2	-13.5333			62.2	-5.40308
									62.3	-14.0699			62.3	-5.97383
									62.4	-14.0578			62.4	-6.35859
									62.5	-14.1102			62.5	-6.17281
									62.6	-13.5904			62.6	-6.97608
									62.7	-13.9997			62.7	-6.9298
									62.8	-13.3834			62.8	-6.69286
									62.9	-13.9867			62.9	-6.43607
									63	-13.1808			63	-5.56198
									63.1	-13.5747			63.1	-4.80444
									63.2	-14.0495			63.2	-4.43772
									63.3	-14.1825			63.3	-5.16905
									63.4	-14.0083			63.4	-5.73821
									63.5	-13.946			63.5	-5.64819
									63.6	-14.0033			63.6	-6.01295
									63.7	-13.6347			63.7	-5.4571
									63.8	-14.2647			63.8	-5.52225
									63.9	-13.363			63.9	-5.00279
									64	-13.8682			64	-4.79741
									64.1	-13.9138			64.1	-4.99169
									64.2	-14.0596			64.2	-5.21661
									64.3	-14.2834			64.3	-4.8869
									64.4	-14.2054			64.4	-5.44703
									64.5	-14.0858			64.5	-5.48205
									64.6	-14.5921			64.6	-5.84826
									64.7	-13.7217			64.7	-6.02744
									64.8	-14.0283			64.8	-6.55504
									64.9	-14.7955			64.9	-6.40323
									65	-13.7123			65	-5.74478
									65.1	-13.8906			65.1	-4.79366
									65.2	-14.3104			65.2	-4.67786
									65.3	-14.2554			65.3	-4.90247
									65.4	-14.2703			65.4	-4.19001
									65.5	-13.8575			65.5	-4.42061
									65.6	-14.1519			65.6	-4.88717
									65.7	-13.7127			65.7	-4.99723
									65.8	-14.1772			65.8	-4.67949
									65.9	-14.4475			65.9	-5.30343
									66	-14.1122			66	-5.64111
									66.1	-13.8973			66.1	-5.80026
									66.2	-14.0328			66.2	-5.90597
									66.3	-14.0515			66.3	-6.31654
									66.4	-13.9891			66.4	-6.4688
									66.5	-13.7506			66.5	-6.01303
									66.6	-14.4567			66.6	-6.48431
									66.7	-13.9794			66.7	-6.84193
									66.8	-13.7796			66.8	-6.5432
									66.9	-14.6441			66.9	-6.34491
									67	-14.1777			67	-6.92577
									67.1	-14.2785			67.1	-6.73353
									67.2	-13.6146			67.2	-6.00473
									67.3	-14.9067			67.3	-4.94718
									67.4	-14.3633			67.4	-5.13608
									67.5	-14.3936			67.5	-5.26713
									67.6	-14.1381			67.6	-5.76428
									67.7	-14.0329			67.7	-6.95723
									67.8	-14.1999			67.8	-7.5862
									67.9	-14.3441			67.9	-7.03628
									68	-14.1121			68	-6.80674
									68.1	-14.3774			68.1	-6.68515
									68.2	-14.1604			68.2	-6.70696
									68.3	-14.446			68.3	-6.73777
									68.4	-13.5451			68.4	-7.2714
									68.5	-13.9205			68.5	-7.23839
									68.6	-13.7276			68.6	-6.47448
									68.7	-13.965			68.7	-5.93976
									68.8	-14.4974			68.8	-6.87727
									68.9	-15.0315			68.9	-8.32359
									69	-14.1479			69	-8.95416
									69.1	-14.5836			69.1	-9.98985
									69.2	-14.363			69.2	-10.0217
									69.3	-14.461			69.3	-9.60064
									69.4	-14.2044			69.4	-8.62232
									69.5	-13.7434			69.5	-7.5272
									69.6	-13.8871			69.6	-8.14358
									69.7	-14.4312			69.7	-8.66243
									69.8	-14.2732			69.8	-9.00058
									69.9	-14.4829			69.9	-9.4778
									70	-14.7075			70	-9.04522
									70.1	-14.5882			70.1	-9.616
									70.2	-14.241			70.2	-9.49862
									70.3	-14.4776			70.3	-9.51366
									70.4	-14.5864			70.4	-10.7802
									70.5	-14.4569			70.5	-11.2925
									70.6	-14.3981			70.6	-11.5005
									70.7	-14.0217			70.7	-10.569
									70.8	-14.1428			70.8	-10.5375
									70.9	-14.552			70.9	-10.5927
									71	-14.4519			71	-11.2934
									71.1	-13.8993			71.1	-12.6048
									71.2	-14.1389			71.2	-12.0886
									71.3	-14.3754			71.3	-11.6928
									71.4	-14.7394			71.4	-10.5888
									71.5	-14.0584			71.5	-9.96533
									71.6	-14.3992			71.6	-9.73289
									71.7	-14.3043			71.7	-8.87627
									71.8	-14.7279			71.8	-10.1518
									71.9	-14.2107			71.9	-11.0544
									72	-14.6419			72	-10.29
									72.1	-14.2952			72.1	-10.144
									72.2	-14.1873			72.2	-9.84684
									72.3	-14.1867			72.3	-10.862
									72.4	-14.9697			72.4	-10.3951
									72.5	-14.2253			72.5	-9.95873
									72.6	-14.3446			72.6	-10.523
									72.7	-13.596			72.7	-10.5738
									72.8	-14.0515			72.8	-10.2846
									72.9	-13.9031			72.9	-10.2281
									73	-16.0621			73	-10.3828
									73.1	-17.8274			73.1	-10.9507
									73.2	-17.5661			73.2	-10.7326
									73.3	-18.3811			73.3	-10.1818
									73.4	-19.0016			73.4	-10.0773
									73.5	-18.795			73.5	-9.39212
									73.6	-17.6744			73.6	-9.06829
									73.7	-18.89			73.7	-9.58699
									73.8	-18.0297			73.8	-10.0013
									73.9	-19.2134			73.9	-10.6629
									74	-18.7692			74	-11.1343
									74.1	-19.3505			74.1	-11.647
									74.2	-18.9883			74.2	-11.9762
									74.3	-19.0587			74.3	-10.6139
									74.4	-19.4981			74.4	-10.5274
									74.5	-18.7807			74.5	-10.1977
									74.6	-18.7387			74.6	-9.94066
									74.7	-18.9364			74.7	-10.1283
									74.8	-19.4362			74.8	-9.81028
									74.9	-18.7545			74.9	-10.0301
									75	-18.8779			75	-9.88642
									75.1	-18.8314			75.1	-9.81702
									75.2	-18.8645			75.2	-10.462
									75.3	-19.3547			75.3	-11.1107
									75.4	-19.1036			75.4	-11.4284
									75.5	-19.2736			75.5	-10.5926
									75.6	-18.7963			75.6	-9.74989
									75.7	-18.8577			75.7	-9.25412
									75.8	-18.8335			75.8	-9.90908
									75.9	-18.6689			75.9	-10.5382
									76	-18.7022			76	-10.3961
									76.1	-19.2319			76.1	-11.8504
									76.2	-19.0709			76.2	-11.8413
									76.3	-18.9735			76.3	-11.8836
									76.4	-19.106			76.4	-11.5618
									76.5	-18.2819			76.5	-11.284
									76.6	-19.239			76.6	-11.981
									76.7	-19.0129			76.7	-11.3243
									76.8	-18.8253			76.8	-11.0767
									76.9	-18.5551			76.9	-11.4533
									77	-19.4764			77	-11.4203
									77.1	-19.091			77.1	-11.7641
									77.2	-18.9623			77.2	-10.4026
									77.3	-18.5718			77.3	-9.47732
									77.4	-19.3612			77.4	-9.67123
									77.5	-19.0427			77.5	-9.53886
									77.6	-18.7168			77.6	-10.1625
									77.7	-18.8851			77.7	-10.4274
									77.8	-18.786			77.8	-11.3113
									77.9	-18.3748			77.9	-11.3206
									78	-18.544			78	-10.699
									78.1	-19.5991			78.1	-10.2838
									78.2	-19.0084			78.2	-11.2717
									78.3	-18.7689			78.3	-12.3209
									78.4	-19.0138			78.4	-12.31
									78.5	-18.8395			78.5	-12.2883
									78.6	-19.443			78.6	-11.4289
									78.7	-18.5722			78.7	-11.4552
									78.8	-18.8292			78.8	-11.0782
									78.9	-19.6867			78.9	-11.2295
									79	-19.8595			79	-11.851
									79.1	-18.7196			79.1	-12.6839
									79.2	-18.4872			79.2	-11.1693
									79.3	-19.0816			79.3	-10.7837
									79.4	-18.7517			79.4	-10.4083
									79.5	-18.3313			79.5	-11.2726
									79.6	-18.8882			79.6	-11.8633
									79.7	-18.5169			79.7	-12.3017
									79.8	-18.4473			79.8	-12.5825
									79.9	-19.6411			79.9	-12.7553
									80	-18.3613			80	-11.2549
									80.1	-19.0603			80.1	-10.806
									80.2	-19.1876			80.2	-11.3187
									80.3	-19.6582			80.3	-11.4446
									80.4	-18.6601			80.4	-12.0713
									80.5	-18.7785			80.5	-12.2781
									80.6	-19.3896			80.6	-12.6617
									80.7	-18.7439			80.7	-11.9345
									80.8	-19.0861			80.8	-11.3693
									80.9	-19.2907			80.9	-11.0977
									81	-18.8901			81	-12.3746
									81.1	-18.9912			81.1	-12.7156
									81.2	-19.4241			81.2	-12.4499
									81.3	-18.7073			81.3	-12.597
									81.4	-19.1657			81.4	-12.1647
									81.5	-19.133			81.5	-11.3759
									81.6	-18.7522			81.6	-10.9289
									81.7	-18.8906			81.7	-11.2603
									81.8	-18.4958			81.8	-12.4888
									81.9	-18.2981			81.9	-12.6213
									82	-18.5417			82	-12.4623
									82.1	-19.4545			82.1	-12.4387
									82.2	-18.5415			82.2	-11.3043
									82.3	-19.335			82.3	-10.4529
									82.4	-19.0756			82.4	-9.92082
									82.5	-19.3889			82.5	-10.9022
									82.6	-19.1873			82.6	-12.3631
									82.7	-19.0754			82.7	-12.6672
									82.8	-19.0458			82.8	-14.4282
									82.9	-19.1464			82.9	-14.6833
									83	-19.3399			83	-13.4929
									83.1	-18.9595			83.1	-12.5517
									83.2	-18.9438			83.2	-11.5823
									83.3	-19.5229			83.3	-11.5228
									83.4	-19.3916			83.4	-11.8352
									83.5	-19.3469			83.5	-11.063
									83.6	-18.9202			83.6	-11.2301
									83.7	-19.3722			83.7	-11.2974
									83.8	-19.1747			83.8	-10.913
									83.9	-18.904			83.9	-11.2436
									84	-18.9212			84	-10.4029
									84.1	-18.8431			84.1	-10.0905
									84.2	-18.9345			84.2	-11.0574
									84.3	-19.6165			84.3	-10.4119
									84.4	-19.1735			84.4	-10.1559
									84.5	-19.4823			84.5	-9.90081
									84.6	-19.0582			84.6	-9.6831
									84.7	-18.7971			84.7	-10.1762
									84.8	-19.4542			84.8	-10.0086
									84.9	-19.1984			84.9	-10.2486
									85	-19.5834			85	-11.2291
									85.1	-19.8827			85.1	-11.6567
									85.2	-19.699			85.2	-12.4524
									85.3	-19.4056			85.3	-11.8058
									85.4	-18.8663			85.4	-11.6695
									85.5	-19.2637			85.5	-11.3654
									85.6	-18.9883			85.6	-10.99
									85.7	-19.5455			85.7	-11.6027
									85.8	-19.4			85.8	-12.3224
									85.9	-18.9951			85.9	-13.7905
									86	-19.7391			86	-14.4186
									86.1	-19.5327			86.1	-13.7957
									86.2	-19.5606			86.2	-13.7776
									86.3	-19.5451			86.3	-12.4605
									86.4	-19.3461			86.4	-11.1834
									86.5	-19.0452			86.5	-11.6542
									86.6	-19.7337			86.6	-11.7842
									86.7	-19.5432			86.7	-11.9102
									86.8	-18.7914			86.8	-11.7009
									86.9	-18.9273			86.9	-11.7135
									87	-19.2261			87	-12.886
									87.1	-19.1409			87.1	-13.0134
									87.2	-19.5372			87.2	-12.9944
									87.3	-19.424			87.3	-13.9296
									87.4	-19.3134			87.4	-13.8553
									87.5	-18.8641			87.5	-12.5836
									87.6	-19.4062			87.6	-12.6729
									87.7	-19.2643			87.7	-13.0731
									87.8	-18.7528			87.8	-13.335
									87.9	-19.2352			87.9	-13.5344
									88	-19.3153			88	-13.2532
									88.1	-19.4374			88.1	-13.465
									88.2	-19.2963			88.2	-13.1629
									88.3	-19.1094			88.3	-12.4957
									88.4	-19.1552			88.4	-13.445
									88.5	-19.6455			88.5	-13.0089
									88.6	-18.7774			88.6	-13.4349
									88.7	-19.6322			88.7	-13.6891
									88.8	-19.3616			88.8	-13.551
									88.9	-19.3325			88.9	-13.6648
									89	-19.2767			89	-13.9268
									89.1	-18.6413			89.1	-14.4932
									89.2	-19.4316			89.2	-14.7486
									89.3	-18.9879			89.3	-14.0623
									89.4	-18.8466			89.4	-13.919
									89.5	-18.6085			89.5	-13.6516
									89.6	-18.6739			89.6	-12.5532
									89.7	-19.2635			89.7	-12.2529
									89.8	-18.9526			89.8	-12.7208
									89.9	-18.6808			89.9	-13.4176
									90	-19.4688			90	-14.2217
									90.1	-18.5252			90.1	-14.1842
									90.2	-18.6298			90.2	-14.1917
									90.3	-19.5166			90.3	-14.6064
									90.4	-18.5579			90.4	-14.0248
									90.5	-18.2695			90.5	-13.6522
									90.6	-19.084			90.6	-14.0024
									90.7	-19.2382			90.7	-13.8931
									90.8	-19.1982			90.8	-13.5889
									90.9	-18.8045			90.9	-14.0989
									91	-18.7449			91	-15.1138
									91.1	-19.1041			91.1	-15.9908
									91.2	-18.9332			91.2	-15.7063
									91.3	-18.7607			91.3	-15.6972
									91.4	-19.0531			91.4	-15.4934
									91.5	-19.6336			91.5	-14.911
									91.6	-19.7879			91.6	-14.3786
									91.7	-18.9676			91.7	-15.67
									91.8	-19.2557			91.8	-16.2662
									91.9	-18.7967			91.9	-16.5092
									92	-18.6295			92	-16.4282
									92.1	-18.8107			92.1	-15.4946
									92.2	-19.2848			92.2	-14.2493
									92.3	-18.8378			92.3	-13.302
									92.4	-18.3848			92.4	-13.0879
									92.5	-18.7026			92.5	-13.7665
									92.6	-18.5588			92.6	-14.0939
									92.7	-19.0358			92.7	-14.0873
									92.8	-18.1881			92.8	-15.2136
									92.9	-18.8079			92.9	-14.8791
									93	-18.6627			93	-14.978
									93.1	-18.4392			93.1	-14.5288
									93.2	-18.7309			93.2	-14.6088
									93.3	-19.4833			93.3	-15.5152
									93.4	-19.6871			93.4	-14.9805
									93.5	-19.9835			93.5	-14.7836
									93.6	-19.293			93.6	-15.4836
									93.7	-19.8284			93.7	-15.7697
									93.8	-20.0815			93.8	-16.3527
									93.9	-19.7627			93.9	-16.5811
									94	-20.4882			94	-16.9141
									94.1	-19.8074			94.1	-17.0102
									94.2	-19.8738			94.2	-16.8708
									94.3	-19.8323			94.3	-16.5297
									94.4	-20.6378			94.4	-16.3617
									94.5	-20.3625			94.5	-16.1816
									94.6	-19.5013			94.6	-16.3539
									94.9	-20.2423			94.9	-16.7838
									95	-19.5826			95	-16.9902
									95.1	-19.9121			95.1	-16.8316
									95.2	-19.8701			95.2	-16.8837
									95.3	-19.4743			95.3	-16.8708
									95.4	-20.0978			95.4	-16.7342
									95.5	-19.9776			95.5	-16.2504
									95.6	-20.2144			95.6	-15.8891
									95.7	-19.4313			95.7	-16.044
									95.9	-18.8922			95.9	-15.8828
									96	-19.7615			96	-15.5338
									96.1	-19.571			96.1	-14.8217
									96.2	-19.9474			96.2	-15.2917
									96.3	-20.0926			96.3	-15.0673
									96.4	-20.3867			96.4	-14.8515
									96.5	-19.9022			96.5	-14.6585
									96.6	-19.7338			96.6	-15.5059
									96.7	-19.9353			96.7	-15.8066
									96.9	-19.6425			96.9	-15.7999
									97	-19.7272			97	-15.8286
									97.1	-19.6737			97.1	-16.0849
									97.3	-20.1827			97.3	-15.9912
									97.4	-19.6822			97.4	-15.5338
									97.5	-20.242			97.5	-14.8217
									97.6	-19.9062			97.6	-15.2917
									97.7	-19.8101			97.7	-15.0097
									97.8	-20.1289			97.8	-14.5705
									97.9	-20.5049			97.9	-15.4264
									98	-20.5525			98	-15.8277
									98.1	-19.5723			98.1	-15.9501
									98.2	-20.4803			98.2	-16.0502
									98.3	-19.577			98.3	-15.9856
									98.5	-19.9654			98.5	-15.9807
									98.6	-20.1272			98.6	-15.5338
									98.7	-19.6188			98.7	-14.8217
									98.8	-20.0366			98.8	-15.2917
									98.9	-19.8199			98.9	-15.0176
									99	-19.693			99	-14.8043
									99.1	-19.587			99.1	-15.1174
									99.2	-20.0968			99.2	-15.5017
									99.4	-20.0528			99.4	-15.6973
									99.5	-20.5805			99.5	-15.5838
									99.6	-19.8242			99.6	-15.2033
									99.7	-20.2534			99.7	-15.0381
									99.8	-19.9672			99.8	-14.9636
									99.9	-20.3086			99.9	-15.0143
									100.1	-20.2707			100.1	-15.2837
									100.2	-19.8498			100.2	-15.4252
									100.3	-20.244			100.3	-15.2641
									100.4	-19.7491			100.4	-15.2352
									100.5	-20.2165			100.5	-15.0673
									100.6	-19.7434			100.6	-14.9679
									100.7	-19.6927			100.7	-14.6855
													100.8	-15.4135
													100.9	-14.9202
													101	-14.9479
													101.1	-15.4658
													101.2	-15.7765
													101.3	-15.7741
													101.4	-15.5672
													101.5	-14.9211
													101.6	-15.0441
													101.7	-13.9555
													101.8	-14.3432
													101.9	-14.8255
													102	-15.251
													102.1	-15.3357
													102.2	-14.8355
													102.3	-15.0959
													102.4	-15.2941
													102.5	-15.0014
													102.6	-15.7661
													102.7	-16.0862
													102.8	-16.846
													102.9	-16.5219
													103	-16.1526
													103.1	-16.3017
													103.2	-15.1028
													103.3	-13.8206
													103.4	-14.2256
													103.5	-15.0942
													103.6	-15.8942
													103.7	-16.4319
													103.8	-17.2907
													103.9	-16.9366
													104	-15.9866
													104.1	-14.8271
													104.2	-14.7249
													104.3	-15.0235
													104.4	-15.5574
													104.5	-16.1983
													104.6	-16.7258
													104.7	-16.0041
													104.8	-15.9435
													104.9	-16.1048
													105	-16.1796
													105.1	-15.8351
													105.2	-16.2764
													105.3	-16.0328
													105.4	-15.5125
													105.5	-14.9447
													105.6	-15.3543
													105.7	-15.8373
													105.8	-16.3772
													105.9	-16.8258
													106	-17.9219
													106.1	-17.5148
													106.2	-16.8522
													106.3	-16.5831
													106.4	-16.729
													106.5	-15.5147
													106.6	-15.2073
													106.7	-15.0098
													106.8	-15.4912
													106.9	-15.3732
													107	-15.5985
													107.1	-16.0322
													107.2	-16.8095
													107.3	-16.1504
													107.4	-16.5204
													107.5	-16.7251
													107.6	-16.779
													107.7	-17.0099
													107.8	-16.2548
													107.9	-15.9014
													108	-15.4204
													108.1	-15.5086
													108.2	-15.7204
													108.3	-15.9769
													108.4	-16.2296
													108.5	-16.7071
													108.6	-15.7735
													108.7	-16.8526
													108.8	-16.8314
													108.9	-17.2117
													109	-16.8653
													109.1	-17.1546
													109.2	-16.5767
													109.3	-16.3649
													109.4	-16.1973
													109.5	-16.7303
													109.6	-15.3807
													109.7	-14.5841
													109.8	-14.8885
													109.9	-15.1235
													110	-14.9525
													110.1	-15.3503
													110.3	-16.452
													110.4	-16.9253
													110.5	-16.2679
													110.7	-16.0613
													110.9	-16.4395
													111	-16.2727
													111.2	-16.1913
													111.3	-15.5481
													111.4	-16.3458
													111.5	-16.9334
													111.6	-16.417
													111.7	-16.931
													111.9	-17.3784
													112	-17.5022
													112.1	-17.2204
													112.2	-16.6364
													112.3	-16.4812
													112.4	-16.7508
													112.5	-16.4854
													112.6	-16.6851
													112.7	-16.7871
													112.8	-16.9425
													112.9	-16.6445
													113.1	-16.2496
													113.2	-15.3786
													113.3	-16.3458
													113.4	-16.9334
													113.5	-16.417
													113.6	-16.931
													113.8	-17.3784
													113.9	-17.5022
													114	-17.2204
													114.1	-16.6377
													114.2	-16.8214
													114.3	-16.5205
													114.4	-15.7421

## Sheet: Ext Data Fig 4h
	T84					E175					F181					F188					A414					P415					N419
ACh (log M)	Mean	SEM	N		ACh (log M)	Mean	SEM	N		ACh (log M)	Mean	SEM	N		ACh (log M)	Mean	SEM	N		ACh (log M)	Mean	SEM	N		ACh (log M)	Mean	SEM	N		ACh (log M)	Mean	SEM	N
-10	0	0	17		-10	0	0	19		-10	0	0	23		-10	0	0	20		-10	0	0	29		-10	0	0	15		-10	0	0	10
-8	1.86574	1.43096	2		-7.5	9.09091	0	1		-8	9.86079	5.47901	3		-7.5	9.99481	1.99845	8		-7.5	7.7297	0.905641	5		-7.5	3.94117	1.94118	2		-6.5	11.3231	1.6377	6
-7.5	4.46773	1.87183	6		-7	17.8497	1.1029	11		-7.5	6.37199	1.36714	3		-7	16.521	2.83914	8		-7	14.3641	1.39431	9		-7	6.41176	2.41176	2		-6	31.8549	3.71105	10
-7	13.8546	3.38387	9		-6.5	41.04	1.38998	19		-7	12.2073	2.0784	2		-6.5	14.2507	2.46527	20		-6.5	22.3823	1.33643	29		-6.5	38.5539	1.19663	15		-5.5	38.4114	2.43653	6
-6.5	30.5586	3.27333	13		-6	69.7468	1.90881	18		-6.5	23.8687	2.30663	17		-6	18.2469	1.78337	12		-6	44.0598	1.41502	24		-6	58.183	0.828685	15		-5	63.1207	2.3717	10
-6	44.9158	7.09529	9		-5.5	90.1846	1.43963	19		-6	39.9162	3.22062	20		-5.5	52.7465	3.2152	20		-5.5	61.3794	1.60643	29		-5.5	76.7793	1.15269	15		-4	100	0	10
-5.5	63.6114	5.18543	11		-5	97.075	0.70655	18		-5.5	54.5281	3.13557	20		-5	68.2151	4.18225	12		-5	83.5973	0.609214	24		-5	90.9011	0.814445	15		-3	136.748	2.7265	2
-5	72.2771	7.24123	11		-4	100	0	19		-4.5	85.9873	1.39362	9		-4.5	85.0605	2.12997	11		-4.5	93.201	0.374898	9		-4	100	0	15
-4.5	97.7124	1.40182	5		-3	100	0	1		-4	100	0	23		-4	100	0	20		-4	99.3103	0.689655	29		-3	100	0	2
-4	100.98	0.541882	17							-3	104.588	1.14719	6		-3	107.207	7.20733	3		-3	104.167	2.00693	6
-3	100	0	1
Best-fit values					Best-fit values					Best-fit values					Best-fit values					Best-fit values					Best-fit values					Best-fit values
Bottom		= 0.000			Bottom		= 0.000			Bottom		= 0.000			Bottom		= 0.000			Bottom		= 0.000			Bottom		= 0.000			Bottom		= 0.000
Top		= 100.0			Top		= 100.0			Top		= 100.0			Top		= 100.0			Top		= 100.0			Top		= 100.0			Top		= 100.0
LogEC50		-5.871			LogEC50		-6.361			LogEC50		-5.732			LogEC50		-5.486			LogEC50		-5.822			LogEC50		-6.171			LogEC50		-5.383
HillSlope		= 1.000			HillSlope		= 1.000			HillSlope		= 1.000			HillSlope		= 1.000			HillSlope		= 1.000			HillSlope		= 1.000			HillSlope		= 1.000
EC50		1.345e-06			EC50		4.357e-07			EC50		1.853e-06			EC50		3.267e-06			EC50		1.507e-06			EC50		6.748e-07			EC50		4.141e-06
Span		= 100.0			Span		= 100.0			Span		= 100.0			Span		= 100.0			Span		= 100.0			Span		= 100.0			Span		= 100.0
Std. Error					Std. Error					Std. Error					Std. Error					Std. Error					Std. Error					Std. Error
LogEC50		0.05096			LogEC50		0.01354			LogEC50		0.02972			LogEC50		0.03059			LogEC50		0.01544			LogEC50		0.01509			LogEC50		0.04914
95% CI (profile likelihood)					95% CI (profile likelihood)					95% CI (profile likelihood)					95% CI (profile likelihood)					95% CI (profile likelihood)					95% CI (profile likelihood)					95% CI (profile likelihood)
LogEC50		-5.988 to -5.754			LogEC50		-6.387 to -6.334			LogEC50		-5.795 to -5.668			LogEC50		-5.549 to -5.423			LogEC50		-5.854 to -5.790			LogEC50		-6.202 to -6.139			LogEC50		-5.491 to -5.275
EC50		1.028e-006 to 1.762e-006			EC50		4.098e-007 to 4.630e-007			EC50		1.602e-006 to 2.147e-006			EC50		2.828e-006 to 3.775e-006			EC50		1.398e-006 to 1.624e-006			EC50		6.276e-007 to 7.253e-007			EC50		3.232e-006 to 5.303e-006
Goodness of Fit					Goodness of Fit					Goodness of Fit					Goodness of Fit					Goodness of Fit					Goodness of Fit					Goodness of Fit
Degrees of Freedom		100			Degrees of Freedom		124			Degrees of Freedom		125			Degrees of Freedom		133			Degrees of Freedom		192			Degrees of Freedom		95			Degrees of Freedom		53
R squared		0.8678			R squared		0.9833			R squared		0.9217			R squared		0.9215			R squared		0.9647			R squared		0.9811			R squared		0.9101
Sum of Squares		20658			Sum of Squares		2935			Sum of Squares		14185			Sum of Squares		15067			Sum of Squares		9047			Sum of Squares		2263			Sum of Squares		7305
Sy.x		14.37			Sy.x		4.865			Sy.x		10.65			Sy.x		10.64			Sy.x		6.864			Sy.x		4.881			Sy.x		11.74
Constraints					Constraints					Constraints					Constraints					Constraints					Constraints					Constraints
Bottom		Bottom = 0			Bottom		Bottom = 0			Bottom		Bottom = 0			Bottom		Bottom = 0			Bottom		Bottom = 0			Bottom		Bottom = 0			Bottom		Bottom = 0
Top		Top = 100			Top		Top = 100			Top		Top = 100			Top		Top = 100			Top		Top = 100			Top		Top = 100			Top		Top = 100
Number of points					Number of points					Number of points					Number of points					Number of points					Number of points					Number of points
# of X values		101			# of X values		125			# of X values		126			# of X values		134			# of X values		193			# of X values		96			# of X values		56
# Y values analyzed		101			# Y values analyzed		125			# Y values analyzed		126			# Y values analyzed		134			# Y values analyzed		193			# Y values analyzed		96			# Y values analyzed		54

## Sheet: Ext Data Fig 4i
	Gi3-FRET response	ACh log(EC50)
T84	9.123	-5.871
E175	5.92	-6.361
F181	9.367	-5.732
F188	11.65	-5.486
A414	6.673	-5.822
P415	9.502	-6.171
N419	12.15	-5.383
Best-fit values
Slope		0.1188
Y-intercept		-6.925
X-intercept		58.28
1/slope		8.416
Std. Error
Slope		0.04157
Y-intercept		0.3925
95% Confidence Intervals
Slope		0.01198 to 0.2257
Y-intercept		-7.934 to -5.916
X-intercept		35.00 to 496.2
Goodness of Fit
R squared		0.6204
Sy.x		0.235
Is slope significantly non-zero?
F		8.172
DFn, DFd		1, 5
P value		0.0355
Deviation from zero?		Significant
Equation		Y = 0.1188*X - 6.925
Data
Number of X values		7
Maximum number of Y replicates		1
Total number of values		7
Number of missing values		0
