# Supplementary material for: Ligand-specific activation trajectories dictate GPCR signalling in cells
Source: Nature. 2026 Jan 14;650(8103):1053–62. doi: 10.1038/s41586-025-09963-3 (PMC12935549; doi:10.1038/s41586-025-09963-3)
Supplement: Supplementary file 16 — Source Data Extended Data Fig. 5 [file 41586_2025_9963_MOESM16_ESM.xlsx]

## Sheet: Ext Data Fig 5a
	wildtype					wildtype					wildtype					wildtype
Ixo (log M)	Mean	SEM	N		ACh (log M)	Mean	SEM	N		Arec (log M)	Mean	SEM	N		Pilo (log M)	Mean	SEM	N
-15.5	-8.33333e-08	0.344544	12		-12.5	-1.33333e-06	0.315776	12		-12	8.33333e-07	0.239179	12		-11	-5e-07	0.345909	12
-13.5	1.24701	0.465471	12		-10.5	1.41917	0.457651	12		-10	0.314541	0.405642	12		-9	-0.239618	0.502761	12
-12.5	1.87858	0.417772	12		-9.5	5.31847	0.661012	12		-9	2.30658	0.543539	12		-8	1.74045	0.601625	12
-11.5	11.9129	0.626449	12		-8.5	26.773	1.98727	12		-8	9.67673	0.49433	12		-7	12.2984	1.45029	12
-10.5	44.7063	1.49768	12		-7.5	68.8377	2.65061	12		-7	42.3675	2.95666	12		-6	42.064	2.94884	12
-9.5	81.3699	0.791307	12		-6.5	95.3692	0.852033	12		-6	86.8902	2.13679	12		-5	72.2535	1.3606	12
-8.5	97.5272	0.852314	12		-5.5	98.848	0.955187	12		-5	108.202	1.01786	12		-4	83.0785	1.05483	12
-7.5	99.5367	0.690054	12		-4.5	100	0.448959	11		-4	116.016	1.04298	12		-3	85.3056	1.08961	12
Best-fit values					Best-fit values					Best-fit values					Best-fit values
Bottom		0.05577			Bottom		0.2672			Bottom		-0.3177			Bottom		-0.4911
Top		100.6			Top		100.5			Top		116.5			Top		85.77
LogEC50		-10.36			LogEC50		-7.935			LogEC50		-6.652			LogEC50		-5.983
HillSlope		0.7527			HillSlope		0.8041			HillSlope		0.7204			HillSlope		0.7491
EC50		4.381e-11			EC50		1.161e-08			EC50		2.228e-07			EC50		1.041e-06
Span		100.5			Span		100.3			Span		116.8			Span		86.26
95% CI (profile likelihood)					95% CI (profile likelihood)					95% CI (profile likelihood)					95% CI (profile likelihood)
Bottom		-0.9425 to 1.040			Bottom		-1.532 to 2.025			Bottom		-2.074 to 1.398			Bottom		-2.298 to 1.261
Top		99.21 to 102.0			Top		98.70 to 102.4			Top		113.7 to 119.4			Top		83.49 to 88.20
LogEC50		-10.40 to -10.32			LogEC50		-7.996 to -7.875			LogEC50		-6.717 to -6.586			LogEC50		-6.061 to -5.903
HillSlope		0.7085 to 0.8006			HillSlope		0.7326 to 0.8830			HillSlope		0.6553 to 0.7927			HillSlope		0.6630 to 0.8514
EC50		4.002e-011 to 4.801e-011			EC50		1.010e-008 to 1.335e-008			EC50		1.919e-007 to 2.596e-007			EC50		8.684e-007 to 1.251e-006
Goodness of Fit					Goodness of Fit					Goodness of Fit					Goodness of Fit
Degrees of Freedom		92			Degrees of Freedom		91			Degrees of Freedom		92			Degrees of Freedom		92
R squared		0.9959			R squared		0.9896			R squared		0.9899			R squared		0.9835
Sum of Squares		687.2			Sum of Squares		1826			Sum of Squares		2194			Sum of Squares		2075
Sy.x		2.733			Sy.x		4.48			Sy.x		4.883			Sy.x		4.75
Number of points					Number of points					Number of points					Number of points
# of X values		104			# of X values		95			# of X values		120			# of X values		112
# Y values analyzed		96			# Y values analyzed		95			# Y values analyzed		96			# Y values analyzed		96

## Sheet: Ext Data Fig 5b
	T84					T84					T84					T84
Ixo (log M)	Mean	SEM	N		ACh (log M)	Mean	SEM	N		Arec (log M)	Mean	SEM	N		Pilo (log M)	Mean	SEM	N
-15.5	-1.11111e-09	0.472881	9		-12.5	0	0.317935	9		-12	1.11111e-09	0.572933	9		-11	-1.11111e-09	0.425462	9
-13.5	1.31177	0.709844	9		-10.5	1.27958	0.587284	9		-10	-1.18702	0.451081	9		-9	1.10626	0.549744	9
-12.5	2.20757	0.980201	9		-9.5	7.12774	0.967629	9		-9	1.5476	0.703789	9		-8	6.19904	1.09489	9
-11.5	11.1827	2.23843	9		-8.5	33.4999	2.53143	9		-8	10.3071	1.98074	9		-7	22.88	2.80662	9
-10.5	38.7572	4.12589	9		-7.5	77.0572	3.27096	9		-7	41.3848	3.54045	9		-6	54.7754	3.52453	9
-9.5	82.3237	2.61804	9		-6.5	98.3628	1.83736	9		-6	83.7796	2.03891	9		-5	70.6076	1.41392	9
-8.5	102.695	1.35886	9		-5.5	102.9	0.624093	9		-5	106.512	1.34972	9		-4	71.0362	1.41021	9
-7.5	104.164	1.2217	9		-4.5	100	0.78453	9		-4	112.99	1.61905	9		-3	68.5945	1.95782	9
Best-fit values					Best-fit values					Best-fit values					Best-fit values
Bottom		0.7471			Bottom		0.1146			Bottom		-1.043			Bottom		0.7624
Top		106.2			Top		102.1			Top		114.4			Top		70.9
LogEC50		-10.19			LogEC50		-8.112			LogEC50		-6.647			LogEC50		-6.623
HillSlope		0.7742			HillSlope		0.817			HillSlope		0.6928			HillSlope		0.8738
EC50		6.444e-11			EC50		7.736e-09			EC50		2.256e-07			EC50		2.381e-07
Span		105.5			Span		102			Span		115.5			Span		70.14
95% CI (profile likelihood)					95% CI (profile likelihood)					95% CI (profile likelihood)					95% CI (profile likelihood)
Bottom		-1.766 to 3.173			Bottom		-2.290 to 2.444			Bottom		-3.298 to 1.142			Bottom		-1.988 to 3.376
Top		102.6 to 110.1			Top		99.90 to 104.5			Top		110.9 to 118.3			Top		68.43 to 73.46
LogEC50		-10.29 to -10.09			LogEC50		-8.187 to -8.035			LogEC50		-6.732 to -6.559			LogEC50		-6.744 to -6.502
HillSlope		0.6674 to 0.9016			HillSlope		0.7264 to 0.9207			HillSlope		0.6149 to 0.7814			HillSlope		0.7186 to 1.068
EC50		5.184e-011 to 8.048e-011			EC50		6.494e-009 to 9.220e-009			EC50		1.854e-007 to 2.761e-007			EC50		1.801e-007 to 3.149e-007
Goodness of Fit					Goodness of Fit					Goodness of Fit					Goodness of Fit
Degrees of Freedom		68			Degrees of Freedom		68			Degrees of Freedom		68			Degrees of Freedom		68
R squared		0.982			R squared		0.9877			R squared		0.9879			R squared		0.9671
Sum of Squares		2493			Sum of Squares		1715			Sum of Squares		1899			Sum of Squares		2265
Sy.x		6.055			Sy.x		5.022			Sy.x		5.285			Sy.x		5.772
Number of points					Number of points					Number of points					Number of points
# of X values		80			# of X values		72			# of X values		96			# of X values		88
# Y values analyzed		72			# Y values analyzed		72			# Y values analyzed		72			# Y values analyzed		72

## Sheet: Ext Data Fig 5c
	E175					E175					E175					E175
Ixo (log M)	Mean	SEM	N		ACh (log M)	Mean	SEM	N		Arec (log M)	Mean	SEM	N		Pilo (log M)	Mean	SEM	N
-15.5	0	0.828345	9		-12.5	1.11111e-09	0.315098	9		-12	1.11111e-09	0.602542	9		-11	0	0.403401	9
-13.5	2.21763	0.683633	9		-10.5	2.56423	1.22513	9		-10	1.32268	1.3174	9		-9	-2.1217	0.891579	9
-12.5	1.49345	1.20549	9		-9.5	10.322	1.54806	9		-9	3.48612	1.1419	9		-8	2.89509	1.83519	9
-11.5	10.7445	2.77566	9		-8.5	41.7706	2.76609	9		-8	20.3712	1.89031	9		-7	15.9759	3.5228	9
-10.5	43.7528	5.48661	9		-7.5	76.5718	3.71025	9		-7	61.3447	4.60207	9		-6	50.3098	5.15541	9
-9.5	88.9244	1.8415	9		-6.5	99.147	2.13204	9		-6	99.6702	1.8722	9		-5	79.0888	2.02754	9
-8.5	106.919	1.63038	9		-5.5	99.0628	1.83742	9		-5	115.598	1.16312	9		-4	86.3511	1.46106	9
-7.5	107.071	0.712445	9		-4.5	100	1.39885	9		-4	119.893	1.3121	9		-3	76.3926	2.85176	9
Best-fit values					Best-fit values					Best-fit values					Best-fit values
Bottom		0.7808			Bottom		-0.1806			Bottom		-0.3805			Bottom		-0.4273
Top		108.8			Top		101.1			Top		120.5			Top		82.5
LogEC50		-10.29			LogEC50		-8.259			LogEC50		-7.014			LogEC50		-6.266
HillSlope		0.8362			HillSlope		0.7198			HillSlope		0.6893			HillSlope		0.8876
EC50		5.173e-11			EC50		5.502e-09			EC50		9.673e-08			EC50		5.418e-07
Span		108			Span		101.3			Span		120.8			Span		82.92
95% CI (profile likelihood)					95% CI (profile likelihood)					95% CI (profile likelihood)					95% CI (profile likelihood)
Bottom		-2.114 to 3.577			Bottom		-3.514 to 2.989			Bottom		-3.192 to 2.326			Bottom		-4.182 to 3.165
Top		104.8 to 113.0			Top		98.20 to 104.1			Top		116.9 to 124.3			Top		78.76 to 86.44
LogEC50		-10.39 to -10.18			LogEC50		-8.366 to -8.152			LogEC50		-7.105 to -6.922			LogEC50		-6.418 to -6.120
HillSlope		0.7065 to 1.001			HillSlope		0.6218 to 0.8374			HillSlope		0.6056 to 0.7881			HillSlope		0.7033 to 1.150
EC50		4.106e-011 to 6.561e-011			EC50		4.302e-009 to 7.043e-009			EC50		7.854e-008 to 1.197e-007			EC50		3.819e-007 to 7.579e-007
Goodness of Fit					Goodness of Fit					Goodness of Fit					Goodness of Fit
Degrees of Freedom		68			Degrees of Freedom		68			Degrees of Freedom		68			Degrees of Freedom		68
R squared		0.9774			R squared		0.9793			R squared		0.9859			R squared		0.9509
Sum of Squares		3443			Sum of Squares		2718			Sum of Squares		2526			Sum of Squares		4812
Sy.x		7.115			Sy.x		6.322			Sy.x		6.095			Sy.x		8.413
Number of points					Number of points					Number of points					Number of points
# of X values		80			# of X values		72			# of X values		96			# of X values		88
# Y values analyzed		72			# Y values analyzed		72			# Y values analyzed		72			# Y values analyzed		72

## Sheet: Ext Data Fig 5d
	F181					F181					F181					F181
Ixo (log M)	Mean	SEM	N		ACh (log M)	Mean	SEM	N		Arec (log M)	Mean	SEM	N		Pilo (log M)	Mean	SEM	N
-15	0	0.670314	9		-15	0	0.477146	9		-15	0	0.434295	9		-15	0	0.156614	9
-11.5	-1.21419	0.811765	9		-8.5	-0.08043	0.625139	9		-9	0.596115	0.229331	9		-8	0.47579	0.751951	9
-10.5	1.3125	0.768299	9		-7.5	3.84536	1.09141	9		-8	-1.0311	0.552619	9		-7	0.00967727	0.179519	9
-9.5	14.195	0.892461	9		-6.5	23.5697	1.07484	9		-7	1.00041	0.418781	9		-6	0.977232	0.737147	9
-8.5	46.119	1.9207	9		-5.5	63.9109	2.30597	9		-6	7.5953	0.927861	9		-5	9.36427	0.769608	9
-7.5	78.583	1.85351	9		-4.5	91.02	1.5873	9		-5	27.0477	1.79771	9		-4	24.5639	0.543752	9
-6.5	98.1627	0.97237	9		-3.5	101.09	1.73524	9		-4	45.2433	1.10102	9		-3	27.6641	0.542718	9
-5.5	100.059	0.960963	9		-2.5	100	0.522241	9		-3	48.9951	1.14131	9
Best-fit values					Best-fit values					Best-fit values
Bottom		-1.498			Bottom		-0.7412			Bottom		-0.1592			Best-fit values		0.1275
Top		102.2			Top		101.3			Top		50.1			Bottom		27.9
LogEC50		-8.367			LogEC50		-5.816			LogEC50		-5.098			Top		-4.741
HillSlope		0.6575			HillSlope		0.7496			HillSlope		0.8456			LogEC50		1.172
EC50		4.3e-09			EC50		1.529e-06			EC50		7.982e-06			HillSlope		1.816e-05
Span		103.7			Span		102.1			Span		50.26			EC50		27.77
95% CI (profile likelihood)					95% CI (profile likelihood)					95% CI (profile likelihood)					Span
Bottom		-3.156 to 0.1200			Bottom		-2.579 to 1.055			Bottom		-1.201 to 0.8614			95% CI (profile likelihood)		-0.4893 to 0.7342
Top		99.84 to 104.7			Top		99.34 to 103.4			Top		48.14 to 52.33			Bottom		26.64 to 29.27
LogEC50		-8.435 to -8.297			LogEC50		-5.880 to -5.751			LogEC50		-5.188 to -5.004			Top		-4.827 to -4.649
HillSlope		0.6016 to 0.7197			HillSlope		0.6823 to 0.8251			HillSlope		0.7232 to 0.9982			LogEC50		0.9692 to 1.486
EC50		3.674e-009 to 5.049e-009			EC50		1.319e-006 to 1.773e-006			EC50		6.491e-006 to 9.902e-006			HillSlope		1.490e-005 to 2.244e-005
Goodness of Fit					Goodness of Fit					Goodness of Fit					EC50
Degrees of Freedom		68			Degrees of Freedom		68			Degrees of Freedom		68			Goodness of Fit		59
R squared		0.9926			R squared		0.9921			R squared		0.981			Degrees of Freedom		0.9791
Sum of Squares		928.5			Sum of Squares		1063			Sum of Squares		547.1			R squared		170.6
Sy.x		3.695			Sy.x		3.953			Sy.x		2.836			Sum of Squares		1.7
															Sy.x
Number of points					Number of points					Number of points
# of X values		80			# of X values		72			# of X values		96			Number of points		79
# Y values analyzed		72			# Y values analyzed		72			# Y values analyzed		72			# of X values		63
															# Y values analyzed

## Sheet: Ext Data Fig 5e
	F188					F188					F188					F188
Ixo (log M)	Mean	SEM	N		ACh (log M)	Mean	SEM	N		Arec (log M)	Mean	SEM	N		Pilo (log M)	Mean	SEM	N
-14.5	0	0.244488	9		-12.5	0	0.532892	9		-11	2.22222e-09	0.4946	9		-11	0	0.559068	9
-12.5	0.518278	0.402421	9		-10.5	0.781125	0.560036	9		-9	-0.948625	0.472065	9		-9	-0.892446	0.756452	9
-11.5	4.4873	0.612076	9		-9.5	2.22136	0.978695	9		-8	3.04948	0.565119	9		-8	2.22527	1.2855	9
-10.5	20.5933	0.856543	9		-8.5	8.26766	0.511163	9		-7	17.4066	0.665897	9		-7	4.41853	1.02364	9
-9.5	56.0739	1.81845	9		-7.5	34.4482	1.12857	9		-6	55.5784	0.909282	9		-6	19.9656	2.04385	9
-8.5	88.9371	1.43954	9		-6.5	69.4789	0.557512	9		-5	88.736	1.48442	9		-5	45.6771	1.0214	9
-7.5	103.679	1.76285	9		-5.5	94.6117	0.875353	9		-4	100.737	1.60312	9		-4	59.1429	1.24954	9
-6.5	103.525	1.40807	9		-4.5	100	0.895784	8		-3	106.511	1.97903	9		-3	60.1645	1.56607	9
Best-fit values					Best-fit values					Best-fit values					Best-fit values
Bottom		-0.2998			Bottom		-0.1302			Bottom		-1.196			Bottom		0.1155
Top		105.7			Top		102.7			Top		105.9			Top		61.38
LogEC50		-9.586			LogEC50		-7.018			LogEC50		-6.055			LogEC50		-5.596
HillSlope		0.6805			HillSlope		0.6633			HillSlope		0.698			HillSlope		0.7927
EC50		2.593e-10			EC50		9.591e-08			EC50		8.803e-07			EC50		2.533e-06
Span		106			Span		102.9			Span		107.1			Span		61.27
95% CI (profile likelihood)					95% CI (profile likelihood)					95% CI (profile likelihood)					95% CI (profile likelihood)
Bottom		-2.013 to 1.369			Bottom		-1.164 to 0.8863			Bottom		-2.806 to 0.3759			Bottom		-1.402 to 1.583
Top		103.6 to 107.9			Top		100.9 to 104.7			Top		103.8 to 108.0			Top		59.12 to 63.85
LogEC50		-9.648 to -9.524			LogEC50		-7.066 to -6.969			LogEC50		-6.114 to -5.996			LogEC50		-5.697 to -5.494
HillSlope		0.6243 to 0.7432			HillSlope		0.6231 to 0.7059			HillSlope		0.6409 to 0.7618			HillSlope		0.6767 to 0.9295
EC50		2.247e-010 to 2.995e-010			EC50		8.583e-008 to 1.074e-007			EC50		7.700e-007 to 1.008e-006			EC50		2.010e-006 to 3.208e-006
Goodness of Fit					Goodness of Fit					Goodness of Fit					Goodness of Fit
Degrees of Freedom		68			Degrees of Freedom		67			Degrees of Freedom		68			Degrees of Freedom		68
R squared		0.9934			R squared		0.9965			R squared		0.994			R squared		0.9793
Sum of Squares		902.5			Sum of Squares		401.9			Sum of Squares		838.1			Sum of Squares		963.7
Sy.x		3.643			Sy.x		2.449			Sy.x		3.511			Sy.x		3.765
Number of points					Number of points					Number of points					Number of points
# of X values		80			# of X values		71			# of X values		96			# of X values		88
# Y values analyzed		72			# Y values analyzed		71			# Y values analyzed		72			# Y values analyzed		72

## Sheet: Ext Data Fig 5f
	A414					A414					A414					A414
Ixo (log M)	Mean	SEM	N		ACh (log M)	Mean	SEM	N		Arec (log M)	Mean	SEM	N		Pilo (log M)	Mean	SEM	N
-15.5	1.11111e-09	0.363884	9		-12.5	-1.11111e-09	0.398467	9		-12	-1.11111e-09	0.29433	9		-11	2.22222e-09	0.712341	9
-13.5	-1.08992	0.327299	9		-10.5	3.495	1.15383	9		-10	1.88314	0.778207	9		-9	0.395897	1.16509	9
-12.5	2.89923	1.12353	9		-9.5	17.3738	1.45979	9		-9	12.8479	1.5241	9		-8	6.39805	0.899903	9
-11.5	23.1583	1.64964	9		-8.5	54.072	1.8237	9		-8	51.5503	2.78007	9		-7	23.824	1.85216	9
-10.5	65.9497	2.5049	9		-7.5	87.82	3.20913	9		-7	94.2294	2.44139	9		-6	64.9099	2.36816	9
-9.5	102.862	1.01457	9		-6.5	98.7524	2.80146	9		-6	112.877	0.977993	9		-5	84.5902	2.23062	9
-8.5	103.094	1.40633	9		-5.5	97.029	1.00785	9		-5	111.558	1.11616	9		-4	83.9694	2.27441	9
-7.5	104.629	1.20358	9		-4.5	100	1.26085	9		-4	111.218	1.18065	9		-3	79.7274	1.91165	9
Best-fit values					Best-fit values					Best-fit values					Best-fit values
Bottom		-0.5395			Bottom		0.2202			Bottom		-0.08414			Bottom		0.9229
Top		106			Top		99.49			Top		112.8			Top		83.42
LogEC50		-10.81			LogEC50		-8.607			LogEC50		-7.905			LogEC50		-6.579
HillSlope		0.85			HillSlope		0.7793			HillSlope		0.8159			HillSlope		0.9694
EC50		1.551e-11			EC50		2.473e-09			EC50		1.245e-08			EC50		2.637e-07
Span		106.5			Span		99.27			Span		112.9			Span		82.5
95% CI (profile likelihood)					95% CI (profile likelihood)					95% CI (profile likelihood)					95% CI (profile likelihood)
Bottom		-2.569 to 1.450			Bottom		-2.895 to 3.203			Bottom		-2.572 to 2.325			Bottom		-1.593 to 3.362
Top		103.9 to 108.1			Top		97.23 to 101.8			Top		110.7 to 114.9			Top		81.08 to 85.81
LogEC50		-10.87 to -10.75			LogEC50		-8.697 to -8.518			LogEC50		-7.970 to -7.839			LogEC50		-6.673 to -6.485
HillSlope		0.7694 to 0.9411			HillSlope		0.6791 to 0.9037			HillSlope		0.7343 to 0.9121			HillSlope		0.8271 to 1.138
EC50		1.337e-011 to 1.797e-011			EC50		2.010e-009 to 3.032e-009			EC50		1.071e-008 to 1.447e-008			EC50		2.126e-007 to 3.276e-007
Goodness of Fit					Goodness of Fit					Goodness of Fit					Goodness of Fit
Degrees of Freedom		68			Degrees of Freedom		68			Degrees of Freedom		68			Degrees of Freedom		68
R squared		0.9909			R squared		0.9837			R squared		0.9905			R squared		0.978
Sum of Squares		1395			Sum of Squares		2063			Sum of Squares		1589			Sum of Squares		2139
Sy.x		4.53			Sy.x		5.508			Sy.x		4.834			Sy.x		5.608
Number of points					Number of points					Number of points					Number of points
# of X values		80			# of X values		72			# of X values		96			# of X values		88
# Y values analyzed		72			# Y values analyzed		72			# Y values analyzed		72			# Y values analyzed		72

## Sheet: Ext Data Fig 5g
	P415					P415					P415					P415
Ixo (log M)	Mean	SEM	N		ACh (log M)	Mean	SEM	N		Arec (log M)	Mean	SEM	N		Pilo (log M)	Mean	SEM	N
-15.5	-1.11111e-09	0.371725	9		-12.5	0	0.55052	9		-12	1.11111e-09	0.844995	9		-11	0	0.657828	9
-13.5	0.773259	0.436121	9		-10.5	-0.300655	0.617958	9		-10	1.24145	0.914083	9		-9	2.53937	0.717561	9
-12.5	0.687762	0.75441	9		-9.5	7.22875	0.913829	9		-9	8.67184	2.30628	9		-8	8.31397	1.90385	9
-11.5	12.2015	0.770276	9		-8.5	37.0678	1.48891	9		-8	31.0987	5.01755	9		-7	31.8435	4.21372	9
-10.5	51.1735	1.05212	9		-7.5	83.2862	2.46173	9		-7	73.0159	4.39091	9		-6	65.0175	2.72567	9
-9.5	91.5048	0.944691	9		-6.5	102.177	1.93079	9		-6	104.392	2.02085	9		-5	81.6484	0.656724	9
-8.5	104.013	0.600381	9		-5.5	99.4001	1.4627	9		-5	111.726	1.62235	9		-4	84.2195	1.34055	9
-7.5	104.438	1.11144	9		-4.5	100	1.09695	9		-4	114.639	1.65792	9		-3	78.3305	1.72986	9
Best-fit values					Best-fit values					Best-fit values					Best-fit values
Bottom		-0.1585			Bottom		-0.2076			Bottom		-0.06412			Bottom		0.8382
Top		105.3			Top		101.2			Top		115.2			Top		82.35
LogEC50		-10.47			LogEC50		-8.246			LogEC50		-7.365			LogEC50		-6.738
HillSlope		0.8601			HillSlope		0.9247			HillSlope		0.6835			HillSlope		0.8116
EC50		3.374e-11			EC50		5.672e-09			EC50		4.314e-08			EC50		1.83e-07
Span		105.4			Span		101.4			Span		115.3			Span		81.51
95% CI (profile likelihood)					95% CI (profile likelihood)					95% CI (profile likelihood)					95% CI (profile likelihood)
Bottom		-1.147 to 0.8193			Bottom		-2.302 to 1.833			Bottom		-4.156 to 3.796			Bottom		-2.377 to 3.874
Top		104.0 to 106.6			Top		99.34 to 103.1			Top		111.1 to 119.7			Top		79.59 to 85.22
LogEC50		-10.51 to -10.44			LogEC50		-8.308 to -8.184			LogEC50		-7.490 to -7.240			LogEC50		-6.859 to -6.616
HillSlope		0.8096 to 0.9158			HillSlope		0.8299 to 1.035			HillSlope		0.5746 to 0.8158			HillSlope		0.6746 to 0.9869
EC50		3.126e-011 to 3.644e-011			EC50		4.924e-009 to 6.543e-009			EC50		3.234e-008 to 5.759e-008			EC50		1.383e-007 to 2.422e-007
Goodness of Fit					Goodness of Fit					Goodness of Fit					Goodness of Fit
Degrees of Freedom		68			Degrees of Freedom		68			Degrees of Freedom		68			Degrees of Freedom		68
R squared		0.9973			R squared		0.9904			R squared		0.9738			R squared		0.9692
Sum of Squares		389.9			Sum of Squares		1369			Sum of Squares		4405			Sum of Squares		2777
Sy.x		2.395			Sy.x		4.488			Sy.x		8.048			Sy.x		6.39
Number of points					Number of points					Number of points					Number of points
# of X values		80			# of X values		72			# of X values		96			# of X values		88
# Y values analyzed		72			# Y values analyzed		72			# Y values analyzed		72			# Y values analyzed		72

## Sheet: Ext Data Fig 5h
	N419					N419					N419					N419
Ixo (log M)	Mean	SEM	N		ACh (log M)	Mean	SEM	N		Arec (log M)	Mean	SEM	N		Pilo (log M)	Mean	SEM	N
-14.5	0	0.435487	9		-12.5	0	0.686761	9		-11	0	0.7426	9		-11	0	0.524177	9
-12.5	-0.578553	0.940815	9		-10.5	-0.0204176	0.962437	9		-9	0.564357	0.380873	9		-9	-0.596051	0.515716	9
-11.5	1.64498	0.653021	9		-9.5	2.09052	0.847913	9		-8	3.77352	0.892647	9		-8	0.292597	0.839254	9
-10.5	15.5577	2.21014	9		-8.5	12.1355	1.04922	9		-7	19.3006	1.36229	9		-7	6.19929	1.20589	9
-9.5	48.2301	3.04526	9		-7.5	40.6398	2.79746	9		-6	56.0655	1.411	9		-6	25.5325	1.15029	9
-8.5	87.1635	1.99536	9		-6.5	81.0843	1.54764	9		-5	81.0833	1.55386	9		-5	46.0078	1.13374	9
-7.5	102.682	1.22118	9		-5.5	99.5112	1.37512	9		-4	91.4626	1.37167	9		-4	50.052	1.6627	9
-6.5	106.595	1.11158	9		-4.5	100	0.619243	9		-3	91.3469	0.854954	9		-3	44.14	1.87252	9
Best-fit values					Best-fit values					Best-fit values					Best-fit values
Bottom		-0.8656			Bottom		0.09357			Bottom		-0.3104			Bottom		0.04696
Top		107.6			Top		102.3			Top		92.15			Top		47.75
LogEC50		-9.392			LogEC50		-7.274			LogEC50		-6.244			LogEC50		-6.089
HillSlope		0.701			HillSlope		0.7536			HillSlope		0.7433			HillSlope		1.049
EC50		4.051e-10			EC50		5.321e-08			EC50		5.703e-07			EC50		8.143e-07
Span		108.5			Span		102.2			Span		92.46			Span		47.7
95% CI (profile likelihood)					95% CI (profile likelihood)					95% CI (profile likelihood)					95% CI (profile likelihood)
Bottom		-3.061 to 1.260			Bottom		-1.686 to 1.827			Bottom		-1.882 to 1.224			Bottom		-1.592 to 1.636
Top		104.7 to 110.8			Top		99.82 to 104.9			Top		90.39 to 93.98			Top		46.02 to 49.55
LogEC50		-9.473 to -9.311			LogEC50		-7.343 to -7.204			LogEC50		-6.305 to -6.183			LogEC50		-6.198 to -5.988
HillSlope		0.6241 to 0.7903			HillSlope		0.6780 to 0.8402			HillSlope		0.6777 to 0.8170			HillSlope		0.8454 to 1.400
EC50		3.367e-010 to 4.891e-010			EC50		4.543e-008 to 6.246e-008			EC50		4.956e-007 to 6.567e-007			EC50		6.343e-007 to 1.027e-006
Goodness of Fit					Goodness of Fit					Goodness of Fit					Goodness of Fit
Degrees of Freedom		68			Degrees of Freedom		68			Degrees of Freedom		68			Degrees of Freedom		68
R squared		0.9886			R squared		0.9907			R squared		0.9928			R squared		0.9679
Sum of Squares		1637			Sum of Squares		1196			Sum of Squares		782			Sum of Squares		1059
Sy.x		4.906			Sy.x		4.193			Sy.x		3.391			Sy.x		3.947
Number of points					Number of points					Number of points					Number of points
# of X values		80			# of X values		72			# of X values		96			# of X values		88
# Y values analyzed		72			# Y values analyzed		72			# Y values analyzed		72			# Y values analyzed		72
