# Supplementary material for: Ligand-specific activation trajectories dictate GPCR signalling in cells
Source: Nature. 2026 Jan 14;650(8103):1053–62. doi: 10.1038/s41586-025-09963-3 (PMC12935549; doi:10.1038/s41586-025-09963-3)
Supplement: Supplementary file 17 — Source Data Extended Data Fig. 6 [file 41586_2025_9963_MOESM17_ESM.xlsx]

## Sheet: Ext Data Fig 6a
Time (s)	T84		Time (s)	F188		Time (s)	A414		Time (s)	P415		Time (s)	N419
0	-0.206681		0	0.786853		0	-0.172623		0	-1.26784		0	-0.870892
0.1	0.163785		0.1	1.23133		0.1	0.53626		0.1	0.447818		0.1	-0.828925
0.2	0.917253		0.2	0.13091		0.2	0.274024		0.2	-0.195743		0.2	-0.766506
0.3	0.302253		0.3	0.741043		0.3	-0.190926		0.3	0.324784		0.3	-0.531954
0.4	-0.433912		0.4	-0.430984		0.4	0.522673		0.4	-0.418861		0.4	-0.209799
0.5	0.0549613		0.5	0.269933		0.5	0.135141		0.5	-0.674794		0.5	0.349082
0.6	0.244611		0.6	0.0839363		0.6	-0.919225		0.6	0.15667		0.6	0.67802
0.7	-0.542083		0.7	-1.24761		0.7	0.18283		0.7	0.913529		0.7	0.531522
0.8	-0.815728		0.8	-1.00126		0.8	-0.341216		0.8	0.324025		0.8	0.450652
0.9	0.315539		0.9	1.08903		0.9	-0.0269387		0.9	0.39041		0.9	0.843076
1	-0.262218		1	1.43607		1	0.298568		1	0.1255		1	0.190724
1.1	-0.261662		1.1	0.355532		1.1	0.355228		1.1	1.21941		1.1	-0.214947
1.2	-0.105431		1.2	1.02219		1.2	-0.280569		1.2	1.90027		1.2	-0.471253
1.3	0.400623		1.3	0.114529		1.3	0.319301		1.3	0.170516		1.3	-0.67847
1.4	0.178184		1.4	1.23942		1.4	-0.472284		1.4	0.417723		1.4	-0.676376
1.5	0.33848		1.5	0.921375		1.5	-0.686675		1.5	0.596585		1.5	-0.412492
1.6	0.064157		1.6	-0.482658		1.6	-0.383738		1.6	-0.602528		1.6	-0.190235
1.7	0.13327		1.7	-0.41061		1.7	0.160345		1.7	0.0740357		1.7	-0.0968044
1.8	0.207513		1.8	1.65999		1.8	-0.260817		1.8	-0.74061		1.8	-0.257924
1.9	-0.150321		1.9	1.67151		1.9	-0.0830319		1.9	1.41389		1.9	0.0562992
2	0.982035		2	0.544723		2	0.186665		2	-0.225268		2	0.300941
2.1	0.185395		2.1	0.832715		2.1	-0.499181		2.1	0.353171		2.1	-0.0832271
2.2	0.125405		2.2	0.199559		2.2	-0.827591		2.2	-1.6929		2.2	-0.364058
2.3	0.350483		2.3	0.996834		2.3	-0.839267		2.3	0.136375		2.3	-0.590267
2.4	0.126228		2.4	1.2732		2.4	-0.562488		2.4	-0.828555		2.4	-0.877287
2.5	0.453039		2.5	1.12929		2.5	-1.54711		2.5	0.756479		2.5	-0.574463
2.6	-0.219555		2.6	1.08487		2.6	-0.631673		2.6	0.0190938		2.6	-0.246861
2.7	-0.182264		2.7	2.45759		2.7	-0.551409		2.7	-0.974414		2.7	0.617938
2.8	0.262663		2.8	2.48317		2.8	-1.02688		2.8	0.675173		2.8	0.906707
2.9	0.913744		2.9	0.91321		2.9	0.544854		2.9	-1.27865		2.9	0.977789
3	0.474721		3	1.20993		3	0.84205		3	0.938882		3	1.30996
3.1	0.286621		3.1	1.68392		3.1	0.386593		3.1	0.509525		3.1	0.555879
3.2	0.303512		3.2	2.61761		3.2	-0.239593		3.2	-1.05357		3.2	0.818175
3.3	0.774332		3.3	2.2786		3.3	-0.67659		3.3	0.788597		3.3	0.0467659
3.4	0.209207		3.4	0.20602		3.4	0.0961833		3.4	0.197829		3.4	-1.09722
3.5	0.0295521		3.5	0.502036		3.5	0.393102		3.5	1.11288		3.5	-1.0191
3.6	0.376037		3.6	2.23203		3.6	-0.317794		3.6	-0.282234		3.6	-1.41033
3.7	0.231374		3.7	2.10309		3.7	-0.705318		3.7	0.226533		3.7	-1.5379
3.8	0.892594		3.8	1.49122		3.8	-0.817348		3.8	-1.12128		3.8	-0.594236
3.9	0.511238		3.9	2.4161		3.9	0.00464053		3.9	-0.317576		3.9	0.0196653
4	0.0683435		4	1.64184		4	0.0319245		4	-0.896964		4	1.23811
4.1	0.50589		4.1	2.81222		4.1	0.323255		4.1	-0.545879		4.1	0.767786
4.2	0.235706		4.2	2.29321		4.2	0.299681		4.2	0.419051		4.2	0.113512
4.3	0.667202		4.3	-0.264848		4.3	-0.0789324		4.3	-0.472918		4.3	-0.664681
4.4	0.507681		4.4	0.161546		4.4	0.462289		4.4	0.64609		4.4	-0.882932
4.5	0.312974		4.5	2.34503		4.5	0.135711		4.5	0.482086		4.5	-1.81161
4.6	0.48007		4.6	2.92495		4.6	1.302		4.6	-0.630979		4.6	-1.15458
4.7	0.407956		4.7	1.75814		4.7	0.835143		4.7	0.119304		4.7	-1.20656
4.8	0.345522		4.8	1.87562		4.8	0.280878		4.8	-4.98328		4.8	-0.989387
4.9	0.519321		4.9	0.407597		4.9	1.14201		4.9	-10.5943		4.9	-1.00182
5	1.02954		5	0.521491		5	-0.128083		5	-13.2877		5	-1.47456
5.1	1.22129		5.1	0.195264		5.1	-0.779284		5.1	-12.7381		5.1	-1.54177
5.2	2.10314		5.2	-2.14046		5.2	0.150675		5.2	-14.893		5.2	-0.286312
5.3	2.81762		5.3	-2.66738		5.3	0.474608		5.3	-13.2903		5.3	-0.173566
5.4	3.80664		5.4	-1.76693		5.4	0.971948		5.4	-14.2624		5.4	0.547124
5.5	5.87033		5.5	-2.05403		5.5	0.255074		5.5	-14.4851		5.5	0.379566
5.6	6.30255		5.6	-3.63183		5.6	-0.190943		5.6	-14.591		5.6	-0.0376748
5.7	6.48889		5.7	-2.82442		5.7	1.49446		5.7	-13.0909		5.7	0.243551
5.8	6.90032		5.8	-3.99254		5.8	-0.299423		5.8	-13.7893		5.8	-0.681338
5.9	7.01457		5.9	-3.7619		5.9	0.587902		5.9	-14.7494		5.9	-0.139639
6	7.05612		6	-5.20443		6	0.0997149		6	-15.2447		6	0.116239
6.1	7.2516		6.1	-4.88913		6.1	1.40966		6.1	-14.1492		6.1	-0.189019
6.2	7.51058		6.2	-5.08129		6.2	0.510244		6.2	-14.1229		6.2	-0.606796
6.3	7.60825		6.3	-4.0729		6.3	1.76768		6.3	-14.9758		6.3	-0.984552
6.4	7.73375		6.4	-5.17474		6.4	0.0936984		6.4	-14.5374		6.4	-2.38681
6.5	7.9128		6.5	-7.56146		6.5	1.59442		6.5	-14.7713		6.5	-3.18495
6.6	7.76477		6.6	-8.06516		6.6	0.505018		6.6	-14.4545		6.6	-5.42217
6.7	8.35131		6.7	-6.96469		6.7	1.26408		6.7	-15.0112		6.7	-6.69667
6.8	7.49933		6.8	-6.2182		6.8	-0.450381		6.8	-13.8752		6.8	-7.88327
6.9	8.0971		6.9	-6.45364		6.9	0.0055006		6.9	-15.8474		6.9	-8.75526
7	8.02619		7	-8.16134		7	1.00565		7	-15.7024		7	-9.46484
7.1	8.69138		7.1	-8.29891		7.1	0.27082		7.1	-14.4726		7.1	-9.43323
7.2	8.52252		7.2	-7.54149		7.2	0.409571		7.2	-15.0851		7.2	-9.81626
7.3	9.31357		7.3	-7.31833		7.3	0.916622		7.3	-16.059		7.3	-10.0282
7.4	9.19003		7.4	-7.98644		7.4	0.0371234		7.4	-14.1622		7.4	-9.96806
7.5	8.94487		7.5	-7.15336		7.5	0.479687		7.5	-14.9026		7.5	-10.5495
7.6	9.59675		7.6	-7.53821		7.6	-0.182032		7.6	-15.9222		7.6	-10.8722
7.7	9.07511		7.7	-7.21512		7.7	0.991418		7.7	-14.5037		7.7	-10.6878
7.8	9.67179		7.8	-9.29499		7.8	0.651026		7.8	-15.7881		7.8	-10.4313
7.9	9.05321		7.9	-8.98611		7.9	0.50559		7.9	-15.0088		7.9	-10.0138
8	9.54491		8	-9.70741		8	1.13233		8	-15.264		8	-10.1911
8.1	9.32693		8.1	-8.99963		8.1	0.96493		8.1	-15.0047		8.1	-9.79922
8.2	8.85979		8.2	-9.28989		8.2	1.05267		8.2	-14.2122		8.2	-9.53517
8.3	9.74446		8.3	-10.5444		8.3	0.407435		8.3	-14.7724		8.3	-9.87563
8.4	9.45804		8.4	-10.727		8.4	0.649934		8.4	-14.616		8.4	-10.6821
8.5	10.6213		8.5	-9.60503		8.5	0.839575		8.5	-15.3594		8.5	-10.9623
8.6	10.2383		8.6	-9.60895		8.6	0.124577		8.6	-15.7826		8.6	-11.4119
8.7	10.0719		8.7	-10.7403		8.7	0.179626		8.7	-15.6179		8.7	-11.5141
8.8	9.7048		8.8	-9.97357		8.8	0.831137		8.8	-15.8255		8.8	-11.9253
8.9	10.648		8.9	-9.9931		8.9	1.3707		8.9	-15.4615		8.9	-11.2242
9	10.5813		9	-9.2617		9	1.04844		9	-15.1205		9	-11.3657
9.1	10.0081		9.1	-10.1926		9.1	0.671188		9.1	-15.3133		9.1	-10.979
9.2	10.2703		9.2	-11.7466		9.2	0.395581		9.2	-14.8595		9.2	-11.3934
9.3	10.0923		9.3	-11.8826		9.3	1.54141		9.3	-15.2795		9.3	-12.1142
9.4	10.3413		9.4	-10.6127		9.4	0.782639		9.4	-15.997		9.4	-12.4427
9.5	10.4641		9.5	-10.1536		9.5	1.00333		9.5	-15.189		9.5	-12.6812
9.6	9.96966		9.6	-11.0021		9.6	0.66258		9.6	-15.1131		9.6	-12.3541
9.7	10.1233		9.7	-10.2304		9.7	1.14614		9.7	-15.0508		9.7	-11.9212
9.8	10.5507		9.8	-10.7355		9.8	1.43229		9.8	-15.4271		9.8	-12.1665
9.9	10.6376		9.9	-10.421		9.9	0.513566		9.9	-15.403		9.9	-12.4975
10	10.877		10	-11.4217		10	1.03945		10	-14.9897		10	-13.2488
10.1	10.5285		10.1	-13.0534		10.1	0.751662		10.1	-15.163		10.1	-13.4685
10.2	10.6552		10.2	-13.04		10.2	1.03932		10.2	-13.7877		10.2	-13.3059
10.3	10.9643		10.3	-11.6843		10.3	2.13112		10.3	-15.5017		10.3	-13.0773
10.4	11.4629		10.4	-11.5433		10.4	1.70944		10.4	-15.1931		10.4	-12.3797
10.5	10.7573		10.5	-12.4013		10.5	1.3488		10.5	-15.839		10.5	-11.4843
10.6	11.3211		10.6	-11.6954		10.6	1.56045		10.6	-15.334		10.6	-11.5657
10.7	11.2152		10.7	-11.9915		10.7	0.959936		10.7	-14.816		10.7	-11.5894
10.8	11.6178		10.8	-11.3145		10.8	1.19305		10.8	-14.7727		10.8	-11.8321
10.9	10.32		10.9	-12.2167		10.9	0.101055		10.9	-15.4848		10.9	-12.4695
11	10.9645		11	-13.4612		11	1.98172		11	-15.3929		11	-13.7104
11.1	10.8498		11.1	-13.489		11.1	0.0203855		11.1	-14.6576		11.1	-14.2595
11.2	11.4204		11.2	-11.6647		11.2	2.2267		11.2	-14.7774		11.2	-14.8912
11.3	11.1061		11.3	-11.3804		11.3	0.928365		11.3	-15.5548		11.3	-13.6396
11.4	11.5133		11.4	-12.6952		11.4	0.039661		11.4	-15.0608		11.4	-13.2818
11.5	10.8074		11.5	-12.2883		11.5	-0.0164109		11.5	-15.4578		11.5	-12.3891
11.6	10.9337		11.6	-12.9823		11.6	1.60689		11.6	-13.8102		11.6	-11.1534
11.7	11.1179		11.7	-12.6817		11.7	0.0147879		11.7	-14.6954		11.7	-10.929
11.8	10.6391		11.8	-13.7208		11.8	1.88816		11.8	-12.8328		11.8	-11.6784
11.9	11.3175		11.9	-13.941		11.9	1.23124		11.9	-13.9778		11.9	-11.726
12	11.4576		12	-14.1684		12	1.66686		12	-15.3769		12	-12.9201
12.1	11.2275		12.1	-12.7809		12.1	1.32042		12.1	-13.9881		12.1	-12.6311
12.2	10.51		12.2	-13.0734		12.2	0.64709		12.2	-14.1158		12.2	-13.0833
12.3	11.2362		12.3	-14.0875		12.3	1.02444		12.3	-14.3236		12.3	-13.6894
12.4	10.3982		12.4	-14.2036		12.4	2.28184		12.4	-13.6534		12.4	-13.5392
12.5	11.4275		12.5	-13.5629		12.5	0.230654		12.5	-12.7322		12.5	-13.535
12.6	10.4596		12.6	-12.8733		12.6	1.29901		12.6	-12.1333		12.6	-14.0372
12.7	11.5028		12.7	-13.8319		12.7	2.26105		12.7	-13.1932		12.7	-13.5809
12.8	10.6028		12.8	-13.4763		12.8	1.45484		12.8	-13.337		12.8	-13.7058
12.9	10.7642		12.9	-13.4355		12.9	1.67624		12.9	-12.9972		12.9	-12.2114
13	11.2779		13	-12.0959		13	1.22028		13	-12.3722		13	-12.8242
13.1	10.7312		13.1	-12.8031		13.1	1.40586		13.1	-12.8084		13.1	-13.0376
13.2	11.6686		13.2	-13.0344		13.2	1.10304		13.2	-12.9257		13.2	-12.8309
13.3	10.9018		13.3	-14.1788		13.3	1.41782		13.3	-10.9836		13.3	-13.4874
13.4	11.0819		13.4	-13.5654		13.4	0.470766		13.4	-12.6513		13.4	-13.303
13.5	10.9887		13.5	-13.8656		13.5	0.848509		13.5	-11.1532		13.5	-13.0161
13.6	10.8668		13.6	-14.5471		13.6	2.00074		13.6	-12.0252		13.6	-12.47
13.7	11.4115		13.7	-14.1042		13.7	2.32835		13.7	-11.6641		13.7	-11.6792
13.8	10.7082		13.8	-13.469		13.8	1.21811		13.8	-12.8239		13.8	-12.3136
13.9	10.8092		13.9	-13.1034		13.9	0.180643		13.9	-12.6576		13.9	-12.5735
14	11.3363		14	-13.9752		14	1.01334		14	-12.3493		14	-11.9895
14.1	10.5888		14.1	-14.1555		14.1	-2.41765		14.1	-11.9773		14.1	-12.5919
14.2	10.5891		14.2	-14.3717		14.2	-4.63548		14.2	-10.8433		14.2	-12.3962
14.3	10.8271		14.3	-13.4738		14.3	-6.16133		14.3	-11.8402		14.3	-13.4435
14.4	10.7516		14.4	-14.0778		14.4	-6.98925		14.4	-11.2174		14.4	-13.166
14.5	10.4842		14.5	-15.1828		14.5	-8.22292		14.5	-10.4641		14.5	-11.9182
14.6	10.5296		14.6	-14.6785		14.6	-10.447		14.6	-10.7645		14.6	-10.8728
14.7	10.1005		14.7	-13.517		14.7	-11.1864		14.7	-10.4746		14.7	-10.3116
14.8	10.6998		14.8	-13.0092		14.8	-11.9506		14.8	-10.9296		14.8	-9.06092
14.9	10.3647		14.9	-13.9245		14.9	-11.9097		14.9	-10.6876		14.9	-9.08563
15	9.91877		15	-14.6119		15	-13.2679		15	-11.9481		15	-8.96232
15.1	10.3516		15.1	-15.5574		15.1	-13.8086		15.1	-10.7614		15.1	-9.82723
15.2	9.99894		15.2	-14.0317		15.2	-13.0985		15.2	-9.32363		15.2	-10.8684
15.3	10.0664		15.3	-13.9705		15.3	-15.0277		15.3	-10.983		15.3	-10.3637
15.4	9.89125		15.4	-15.5357		15.4	-14.11		15.4	-10.4858		15.4	-10.8034
15.5	9.53741		15.5	-15.0027		15.5	-15.164		15.5	-10.4041		15.5	-10.9513
15.6	10.3878		15.6	-14.127		15.6	-14.9909		15.6	-11.4191		15.6	-11.4898
15.7	9.63215		15.7	-13.8817		15.7	-14.0586		15.7	-9.16209		15.7	-10.8218
15.8	9.61255		15.8	-14.2312		15.8	-14.6205		15.8	-11.0673		15.8	-9.66002
15.9	9.75402		15.9	-14.1612		15.9	-13.8225		15.9	-10.4982		15.9	-8.64007
16	8.76962		16	-15.5699		16	-14.6473		16	-10.2217		16	-8.93211
16.1	9.86817		16.1	-14.2982		16.1	-13.8037		16.1	-10.6522		16.1	-7.98612
16.2	9.57507		16.2	-14.4915		16.2	-14.2901		16.2	-11.2142		16.2	-8.03965
16.3	9.41051		16.3	-15.9612		16.3	-14.6197		16.3	-9.46665		16.3	-8.63236
16.4	9.27667		16.4	-15.5818		16.4	-15.2389		16.4	-9.84776		16.4	-10.1658
16.5	9.148		16.5	-14.6766		16.5	-13.9515		16.5	-10.6089		16.5	-10.0995
16.6	9.10858		16.6	-14.8483		16.6	-14.2336		16.6	-9.32951		16.6	-10.3929
16.7	9.06439		16.7	-15.2001		16.7	-15.5178		16.7	-9.6407		16.7	-10.5836
16.8	9.16675		16.8	-14.543		16.8	-15.2319		16.8	-10.0531		16.8	-10.5621
16.9	9.0543		16.9	-15.6041		16.9	-15.5724		16.9	-10.3943		16.9	-10.0307
17	9.1865		17	-14.5076		17	-14.6146		17	-9.62224		17	-9.08162
17.1	8.82363		17.1	-15.2179		17.1	-14.4328		17.1	-9.1289		17.1	-8.36201
17.2	8.8095		17.2	-16.4425		17.2	-14.633		17.2	-9.71038		17.2	-8.23008
17.3	8.48329		17.3	-16.2407		17.3	-15.4095		17.3	-8.56968		17.3	-7.59799
17.4	8.59887		17.4	-14.405		17.4	-14.7524		17.4	-10.2303		17.4	-7.73861
17.5	8.00284		17.5	-14.1461		17.5	-15.7233		17.5	-9.58981		17.5	-8.75983
17.6	7.96323		17.6	-15.1253		17.6	-15.2695		17.6	-9.09944		17.6	-8.96682
17.7	8.40252		17.7	-14.8452		17.7	-13.9222		17.7	-10.0479		17.7	-9.69502
17.8	8.13182		17.8	-14.8132		17.8	-17.2897		17.8	-9.94835		17.8	-8.99372
17.9	8.3487		17.9	-14.1203		17.9	-14.067		17.9	-9.00947		17.9	-8.67405
18	7.12838		18	-14.0618		18	-14.7516		18	-9.90498		18	-8.29628
18.1	7.4821		18.1	-15.2271		18.1	-15.611		18.1	-9.40633		18.1	-7.55106
18.2	7.96906		18.2	-16.1512		18.2	-14.9011		18.2	-9.83202		18.2	-7.78585
18.3	7.705		18.3	-14.8589		18.3	-15.4672		18.3	-9.67838		18.3	-8.05472
18.4	7.44227		18.4	-14.4394		18.4	-14.988		18.4	-8.41883		18.4	-7.72117
18.5	7.35188		18.5	-15.4551		18.5	-15.5388		18.5	-8.88429		18.5	-8.12588
18.6	7.73513		18.6	-14.6305		18.6	-14.8149		18.6	-9.07225		18.6	-6.65593
18.7	7.46918		18.7	-15.0833		18.7	-16.1321		18.7	-10.2774		18.7	-6.89181
18.8	6.68185		18.8	-14.7851		18.8	-13.7947		18.8	-9.96757		18.8	-6.85191
18.9	7.06425		18.9	-14.8085		18.9	-15.5394		18.9	-8.47933		18.9	-6.85175
19	7.59721		19	-16.0817		19	-15.6967		19	-8.52037		19	-7.59224
19.1	7.19601		19.1	-16.3271		19.1	-14.4757		19.1	-9.17512		19.1	-7.97101
19.2	6.67619		19.2	-14.4211		19.2	-14.5044		19.2	-7.55778		19.2	-8.08381
19.3	6.5272		19.3	-14.0195		19.3	-15.2682		19.3	-9.14932		19.3	-8.56007
19.4	6.81555		19.4	-14.6355		19.4	-15.6178		19.4	-8.91128		19.4	-7.5571
19.5	6.0443		19.5	-13.6685		19.5	-15.4843		19.5	-7.60304		19.5	-7.48837
19.6	6.43909		19.6	-14.5788		19.6	-14.8041		19.6	-8.98203		19.6	-7.01854
19.7	5.77624		19.7	-14.2341		19.7	-14.6766		19.7	-8.77339		19.7	-6.66465
19.8	6.64345		19.8	-14.8694		19.8	-15.2697		19.8	-9.51501		19.8	-6.23697
19.9	6.67692		19.9	-13.9118		19.9	-14.7144		19.9	-7.97784		19.9	-5.32697
20	6.05299		20	-14.2222		20	-14.6271		20	-6.72132		20	-5.11287
20.1	6.47178		20.1	-12.9181		20.1	-15.1073		20.1	-7.80214		20.1	-6.55363
20.2	6.24886		20.2	-12.9943		20.2	-14.757		20.2	-8.15537		20.2	-6.45145
20.3	5.56649		20.3	-14.4067		20.3	-14.4015		20.3	-7.79253		20.3	-7.18534
20.4	5.74996		20.4	-14.2436		20.4	-15.3482		20.4	-8.71674		20.4	-7.09611
20.5	5.18261		20.5	-12.4066		20.5	-14.5296		20.5	-9.30587		20.5	-6.7727
20.6	6.0013		20.6	-12.2819		20.6	-15.3615		20.6	-8.49463		20.6	-5.64322
20.7	5.0206		20.7	-12.9789		20.7	-15.4443		20.7	-7.53438		20.7	-4.63361
20.8	5.71466		20.8	-12.0328		20.8	-15.746		20.8	-7.76711		20.8	-4.74191
20.9	5.76102		20.9	-12.9832		20.9	-16.2016		20.9	-6.54309		20.9	-4.85073
21	5.07722		21	-12.6192		21	-15.7193		21	-8.17143		21	-5.28026
21.1	5.38492		21.1	-12.7681		21.1	-14.7184		21.1	-8.30079		21.1	-6.78924
21.2	5.28619		21.2	-14.0037		21.2	-16.0027		21.2	-8.43893		21.2	-6.2457
21.3	5.09075		21.3	-13.7536		21.3	-15.6765		21.3	-7.89729		21.3	-6.40726
21.4	5.21518		21.4	-11.8578		21.4	-16.2265		21.4	-9.03369		21.4	-6.17303
21.5	4.35512		21.5	-11.4661		21.5	-15.5008		21.5	-8.07862		21.5	-6.14131
21.6	4.8965		21.6	-12.2066		21.6	-14.7031		21.6	-7.66671		21.6	-6.00977
21.7	4.79146		21.7	-11.087		21.7	-15.8759		21.7	-6.9911		21.7	-5.12639
21.8	4.41707		21.8	-11.6731		21.8	-15.9577		21.8	-6.91814		21.8	-5.76223
21.9	4.70925		21.9	-10.9285		21.9	-15.5443		21.9	-7.75156		21.9	-5.76651
22	4.62192		22	-11.2227		22	-14.9467		22	-6.268		22	-5.41541
22.1	4.59658		22.1	-12.3488		22.1	-15.9765		22.1	-7.36077		22.1	-6.04477
22.2	4.38215		22.2	-11.835		22.2	-16.4166		22.2	-7.11856		22.2	-6.049
22.3	4.16791		22.3	-9.89451		22.3	-15.7067		22.3	-7.8469		22.3	-5.9571
22.4	4.08281		22.4	-9.56153		22.4	-14.8833		22.4	-7.05192		22.4	-5.47639
22.5	4.29869		22.5	-10.2076		22.5	-15.7731		22.5	-7.69927		22.5	-4.80531
22.6	3.91268		22.6	-9.71439		22.6	-14.8064		22.6	-7.01089		22.6	-5.02372
22.7	3.76035		22.7	-10.198		22.7	-14.0965		22.7	-7.99971		22.7	-4.66203
22.8	4.00481		22.8	-9.11634		22.8	-15.3519		22.8	-8.09746		22.8	-4.94539
22.9	3.78462		22.9	-9.62505		22.9	-13.4631		22.9	-7.3748		22.9	-4.60811
23	4.1735		23	-10.9875		23	-14.4463		23	-7.1171		23	-5.36075
23.1	3.93533		23.1	-10.9788		23.1	-14.571		23.1	-6.72284		23.1	-5.41262
23.2	4.06686		23.2	-9.35017		23.2	-13.516		23.2	-6.8111		23.2	-5.44262
23.3	3.25204		23.3	-8.48128		23.3	-13.9175		23.3	-7.23717		23.3	-6.1074
23.4	3.07336		23.4	-9.02268		23.4	-13.3917		23.4	-7.03162		23.4	-6.57379
23.5	3.52922		23.5	-8.40531		23.5	-13.0171		23.5	-6.53146		23.5	-6.57818
23.6	3.64611		23.6	-8.70856		23.6	-11.046		23.6	-6.69344		23.6	-6.16318
23.7	3.71926		23.7	-7.92126		23.7	-12.68		23.7	-6.58754		23.7	-5.36809
23.8	3.69017		23.8	-8.29208		23.8	-11.833		23.8	-8.15183		23.8	-4.66825
23.9	2.89958		23.9	-9.8064		23.9	-11.9444		23.9	-5.93361		23.9	-4.55825
24	2.84714		24	-10.2347		24	-11.7397		24	-6.58159		24	-4.87299
24.1	2.95067		24.1	-8.26143		24.1	-11.7398		24.1	-4.98663		24.1	-5.30566
24.2	2.89266		24.2	-7.17898		24.2	-11.8304		24.2	-6.81647		24.2	-4.20011
24.3	2.95168		24.3	-7.5755		24.3	-11.0003		24.3	-6.71727		24.3	-4.37005
24.4	2.19488		24.4	-6.89338		24.4	-10.8447		24.4	-6.67415		24.4	-3.59741
24.5	3.45007		24.5	-8.09556		24.5	-11.6903		24.5	-7.12728		24.5	-3.36304
24.6	2.74057		24.6	-7.62848		24.6	-11.1581		24.6	-6.44756		24.6	-2.60336
24.7	2.83393		24.7	-7.54149		24.7	-10.9541		24.7	-6.70463		24.7	-3.56044
24.8	2.51244		24.8	-8.72623		24.8	-9.85056		24.8	-7.2562		24.8	-4.4925
24.9	2.35449		24.9	-8.54872		24.9	-9.86412		24.9	-5.34391		24.9	-4.98531
25	2.73413		25	-6.85065		25	-8.55728		25	-6.35285		25	-4.41407
25.1	2.5643		25.1	-6.63827		25.1	-10.1135		25.1	-5.95453		25.1	-4.72298
25.2	2.36086		25.2	-7.18631		25.2	-9.07208		25.2	-6.02149		25.2	-4.0906
25.3	2.22817		25.3	-6.02082		25.3	-9.76133		25.3	-6.11531		25.3	-3.57751
25.4	1.54174		25.4	-6.61808		25.4	-9.20591		25.4	-5.4813		25.4	-2.6054
25.5	2.09234		25.5	-5.92548		25.5	-9.38685		25.5	-6.55226		25.5	-2.6814
25.6	2.76879		25.6	-6.30055		25.6	-9.59063		25.6	-6.50288		25.6	-2.62934
25.7	2.29395		25.7	-8.08102		25.7	-9.01235		25.7	-5.71611		25.7	-3.4424
25.8	1.23523		25.8	-8.34118		25.8	-9.80162		25.8	-4.99966		25.8	-3.05323
25.9	2.16032		25.9	-6.09244		25.9	-8.68524		25.9	-5.61129		25.9	-3.10462
26	2.04622		26	-5.88597		26	-8.94665		26	-6.83702		26	-3.6748
26.1	2.05259		26.1	-6.86042		26.1	-10.8963		26.1	-6.69489		26.1	-3.55584
26.2	1.86127		26.2	-5.76706		26.2	-8.45951		26.2	-4.03966		26.2	-3.30041
26.3	1.60921		26.3	-5.90295		26.3	-8.75427		26.3	-6.83221		26.3	-3.4619
26.4	1.53172		26.4	-5.18624		26.4	-8.38003		26.4	-5.27531		26.4	-3.52521
26.5	1.4682		26.5	-4.98022		26.5	-8.44615		26.5	-5.56254		26.5	-5.04403
26.6	1.20435		26.6	-6.59991		26.6	-8.37527		26.6	-5.08216		26.6	-4.45454
26.7	1.63774		26.7	-7.40237		26.7	-7.71329		26.7	-5.30206		26.7	-4.38924
26.8	1.53736		26.8	-5.62552		26.8	-8.3193		26.8	-4.555		26.8	-5.47677
26.9	1.31064		26.9	-5.17704		26.9	-7.84066		26.9	-6.81957		26.9	-5.67286
27	1.33387		27	-6.11391		27	-6.99347		27	-5.297		27	-5.54954
27.1	1.77853		27.1	-5.31062		27.1	-7.98349		27.1	-4.25386		27.1	-4.93143
27.2	1.5899		27.2	-5.50883		27.2	-6.69421		27.2	-6.44452		27.2	-5.6917
27.3	1.93672		27.3	-5.08471		27.3	-7.31876		27.3	-4.67854		27.3	-5.93962
27.4	1.31158		27.4	-5.59271		27.4	-7.89913		27.4	-5.18705		27.4	-5.24177
27.5	1.26904		27.5	-5.02175		27.5	-8.37507		27.5	-6.94235		27.5	-3.94448
27.6	0.831031		27.6	-5.3991		27.6	-7.52159		27.6	-5.54098		27.6	-3.95279
27.7	1.03447		27.7	-4.32969		27.7	-7.37364		27.7	-4.55942		27.7	-4.05335
27.8	1.06124		27.8	-3.98436		27.8	-7.30508		27.8	-5.17333		27.8	-3.61578
27.9	1.04377		27.9	-5.71281		27.9	-7.89488		27.9	-5.11725		27.9	-3.35579
28	0.856513		28	-5.63735		28	-5.37503		28	-4.92164		28	-4.37804
28.1	1.1839		28.1	-4.19142		28.1	-6.86792		28.1	-5.22043		28.1	-4.13067
28.2	0.705607		28.2	-3.99057		28.2	-6.40731		28.2	-6.28305		28.2	-4.14575
28.3	1.45845		28.3	-4.89021		28.3	-6.51349		28.3	-5.37287		28.3	-2.94283
28.4	0.700065		28.4	-3.90025		28.4	-6.67682		28.4	-5.8516		28.4	-3.79262
28.5	1.08462		28.5	-4.82204		28.5	-7.0047		28.5	-6.02433		28.5	-4.30055
28.6	0.292743		28.6	-3.94374		28.6	-6.66416		28.6	-4.42343		28.6	-4.4232
28.7	0.502647		28.7	-3.99108		28.7	-7.65309		28.7	-5.68513		28.7	-4.9048
28.8	1.1303		28.8	-5.37389		28.8	-5.43385		28.8	-5.58543		28.8	-4.56988
28.9	0.791344		28.9	-5.1705		28.9	-5.40844		28.9	-3.75091		28.9	-3.40285
29	1.17817		29	-3.57347		29	-5.54185		29	-5.86969		29	-2.48557
29.1	0.215039		29.1	-3.56871		29.1	-6.19314		29.1	-5.59042		29.1	-1.88046
29.2	0.706332		29.2	-4.69804		29.2	-5.20539		29.2	-6.2771		29.2	-2.656
29.3	0.420564		29.3	-3.89704		29.3	-6.03253		29.3	-3.80813		29.3	-2.90658
29.4	0.749552		29.4	-4.8612		29.4	-5.94226		29.4	-4.68815		29.4	-3.42797
29.5	0.56709		29.5	-3.66253		29.5	-5.24035		29.5	-5.1378		29.5	-3.91224
29.6	0.521305		29.6	-3.8773		29.6	-6.30906		29.6	-4.3841		29.6	-3.91298
29.7	-0.0246784		29.7	-5.24222		29.7	-4.1831		29.7	-3.88071		29.7	-3.46558
29.8	0.85765		29.8	-4.84771		29.8	-5.03611		29.8	-3.58564		29.8	-3.11772
29.9	0.762572		29.9	-3.18788		29.9	-5.80184		29.9	-4.44771		29.9	-3.83756
30	0.220726		30	-3.0773		30	-3.91858		30	-4.604		30	-3.53455
30.1	0.385862		30.1	-4.17288		30.1	-4.22465		30.1	-4.37746		30.1	-3.21953
30.2	0.91585		30.2	-3.65329		30.2	-3.42112		30.2	-4.52933		30.2	-3.10604
30.3	-0.173407		30.3	-4.02827		30.3	-4.73698		30.3	-4.19279		30.3	-2.17544
30.4	0.519659		30.4	-2.78688		30.4	-4.38613		30.4	-4.13386		30.4	-2.78674
30.5	0.0140888		30.5	-2.78214		30.5	-4.26915		30.5	-4.83736		30.5	-2.75123
30.6	0.69975		30.6	-3.81732		30.6	-4.19263		30.6	-4.59483		30.6	-3.03984
30.7	0.197156		30.7	-4.23257		30.7	-3.4865		30.7	-4.17913		30.7	-3.68348
30.8	0.607551		30.8	-2.64967		30.8	-5.18935		30.8	-4.25633		30.8	-3.56805
30.9	0.00290875		30.9	-2.59648		30.9	-3.15632		30.9	-3.58691		30.9	-3.93572
31	-0.0505232		31	-4.13984		31	-4.29471		31	-5.49192		31	-4.40625
31.1	-6.77579e-05		31.1	-3.57572		31.1	-3.52736		31.1	-4.23211		31.1	-3.76119
31.2	0.458411		31.2	-3.2661		31.2	-3.94391		31.2	-3.60518		31.2	-4.10977
31.3	0.149701		31.3	-2.03675		31.3	-3.65635		31.3	-3.77525		31.3	-3.02095
31.4	-0.212295		31.4	-1.98321		31.4	-4.31836		31.4	-3.85706		31.4	-1.88289
31.5	0.191469		31.5	-3.4816		31.5	-3.95217		31.5	-3.14902		31.5	-1.37079
31.6	1.00744		31.6	-4.03849		31.6	-3.74515		31.6	-3.19713		31.6	-1.45839
31.7	0.452579		31.7	-2.42334		31.7	-3.54129		31.7	-4.15068		31.7	-1.64561
31.8	-0.0454171		31.8	-2.38874		31.8	-3.49487		31.8	-3.69546		31.8	-3.24177
31.9	0.508237		31.9	-2.85169		31.9	-2.74331		31.9	-5.36775		31.9	-4.47263
32	0.181015		32	-1.88417		32	-2.92262		32	-4.27706		32	-5.1203
32.1	0.504341		32.1	-2.01816		32.1	-2.29847		32.1	-4.22042		32.1	-5.01152
32.2	-0.551617		32.2	-1.18184		32.2	-3.10805		32.2	-3.81534		32.2	-4.67614
32.3	0.239698		32.3	-1.76818		32.3	-3.54411		32.3	-3.48328		32.3	-4.61496
32.4	0.313845		32.4	-4.06272		32.4	-4.04409		32.4	-2.94657		32.4	-3.20917
32.5	0.346393		32.5	-3.28793		32.5	-3.11166		32.5	-3.29285		32.5	-2.36399
32.6	0.471769		32.6	-1.59511		32.6	-4.08925		32.6	-3.33856		32.6	-2.77101
32.7	-0.367679		32.7	-1.13364		32.7	-2.15968		32.7	-3.82861		32.7	-2.81269
32.8	0.516151		32.8	-1.62272		32.8	-2.3004		32.8	-2.95871		32.8	-2.71763
32.9	-0.331234		32.9	-3.79935		32.9	-3.40907		32.9	-4.337		32.9	-2.69215
33	0.230164		33	-3.62734		33	-2.46154		33	-2.24706		33	-2.43311
33.1	-0.679583		33.1	-1.89819		33.1	-3.20902		33.1	-3.60568		33.1	-2.92321
33.2	-0.214691		33.2	-1.10062		33.2	-3.2054		33.2	-3.43017		33.2	-1.78298
33.3	0.107667		33.3	-1.55603		33.3	-2.74879		33.3	-2.33892		33.3	-2.73974
33.4	-0.150127		33.4	-2.27335		33.4	-2.77033		33.4	-4.29243		33.4	-3.43595
33.5	0.230188		33.5	-2.30073		33.5	-2.12424		33.5	-3.77917		33.5	-3.68088
33.6	-0.147998		33.6	-1.06723		33.6	-2.29251		33.6	-3.26415		33.6	-2.7216
33.7	0.301987		33.7	-1.7051		33.7	-2.5995		33.7	-3.11525		33.7	-1.63266
33.8	-0.259121		33.8	-2.55505		33.8	-2.23386		33.8	-3.61966		33.8	-1.29596
33.9	0.147064		33.9	-2.23547		33.9	-1.45411		33.9	-3.71386		33.9	-2.06891
34	-0.367993		34	-1.83516		34	-2.6823		34	-2.53384		34	-2.55934
34.1	0.205965		34.1	-0.710007		34.1	-1.22578		34.1	-2.11966		34.1	-3.43392
34.2	0.455846		34.2	-1.05092		34.2	-2.31599		34.2	-3.284		34.2	-4.23037
34.3	-0.36475		34.3	-2.97879		34.3	-1.40346		34.3	-2.65353		34.3	-5.07583
34.4	0.494855		34.4	-2.80828		34.4	-3.21194		34.4	-3.48613		34.4	-4.00281
34.5	0.29993		34.5	-1.16901		34.5	-2.32062		34.5	-3.71987		34.5	-3.75134
34.6	-0.00764212		34.6	-0.875415		34.6	-0.89139		34.6	-4.53749		34.6	-3.9621
34.7	-0.144344		34.7	-1.58408		34.7	-1.66849		34.7	-3.7652		34.7	-4.12541
34.8	-0.0289617		34.8	-0.299112		34.8	-1.65925		34.8	-3.07934		34.8	-3.60646
34.9	-0.712639		34.9	-0.778759		34.9	-2.80032		34.9	-4.27333		34.9	-1.90209
35	0.0889613		35	0.0182689		35	-2.23594		35	-2.7672		35	-1.38735
35.1	-0.0808448		35.1	-0.748119		35.1	-2.09298		35.1	-2.9656		35.1	-1.66137
35.2	0.112919		35.2	-2.87836		35.2	-1.80726		35.2	-2.08925		35.2	-0.762886
35.3	-0.286659		35.3	-2.49173		35.3	-2.32806		35.3	-2.90434		35.3	-1.49688
35.4	0.110523		35.4	-0.635011		35.4	-1.90012		35.4	-3.37865		35.4	-2.13372
35.5	0.487087		35.5	-0.264099		35.5	-1.53674		35.5	-2.29473		35.5	-3.59045
35.6	2.42387		35.6	-0.461882		35.6	-1.36147		35.6	-2.71555		35.6	-3.65263
35.7	4.31829		35.7	-1.849		35.7	-2.9699		35.7	-2.90573		35.7	-3.65761
35.8	4.203		35.8	-1.54638		35.8	-2.87313		35.8	-2.04923		35.8	-2.81736
35.9	5.56687		35.9	0.123179		35.9	-1.58009		35.9	-2.86982		35.9	-2.47046
36	5.81508		36	0.242975		36	-2.40117		36	-3.52805		36	-1.27576
36.1	6.58346		36.1	-0.342599		36.1	-1.54944		36.1	-2.66004		36.1	-2.00454
36.2	6.02025		36.2	-1.82909		36.2	-1.9625		36.2	-3.08781		36.2	-2.525
36.3	6.63442		36.3	-1.36661		36.3	-1.96672		36.3	-1.4558		36.3	-4.40301
36.4	5.62623		36.4	0.285928		36.4	-1.72395		36.4	-2.51443		36.4	-4.22325
36.5	7.03453		36.5	0.697749		36.5	-1.51882		36.5	-3.60878		36.5	-4.62753
36.6	6.41496		36.6	-0.15898		36.6	-1.17455		36.6	-2.65719		36.6	-2.83686
36.7	6.75532		36.7	0.333852		36.7	-1.26328		36.7	-4.19607		36.7	-2.63551
36.8	7.05505		36.8	-0.75213		36.8	-1.8121		36.8	-2.12826		36.8	-1.19451
36.9	7.60472		36.9	0.152506		36.9	-0.907844		36.9	-3.1726		36.9	-2.44275
37	6.99613		37	-0.412307		37	-0.46893		37	-2.01325		37	-3.43775
37.1	6.81548		37.1	-1.98971		37.1	-2.01611		37.1	-3.70406		37.1	-4.42954
37.2	7.17501		37.2	-1.633		37.2	-0.434475		37.2	-2.39873		37.2	-4.14733
37.3	6.32111		37.3	0.370623		37.3	-2.53233		37.3	-2.26033		37.3	-4.57229
37.4	7.57246		37.4	0.470567		37.4	-1.22895		37.4	-3.14668		37.4	-4.16201
37.5	7.37705		37.5	-0.406434		37.5	-1.70789		37.5	-0.747059		37.5	-4.64727
37.6	7.43726		37.6	0.440911		37.6	-0.780612		37.6	-2.20956		37.6	-3.47348
37.7	8.26761		37.7	-0.599825		37.7	-2.35045		37.7	-1.94997		37.7	-4.35473
37.8	7.36415		37.8	0.694207		37.8	-0.955223		37.8	-2.77605		37.8	-3.97911
37.9	7.60534		37.9	0.154871		37.9	-1.50294		37.9	-1.30381		37.9	-3.08473
38	8.41103		38	-1.49999		38	-0.971299		38	-1.08354		38	-2.57734
38.1	7.88744		38.1	-0.838312		38.1	-1.27546		38.1	-2.13679		38.1	-2.12972
38.2	8.03962		38.2	1.15163		38.2	-0.779071		38.2	-2.15431		38.2	-2.94376
38.3	8.08316		38.3	1.41219		38.3	-1.47076		38.3	-2.53093		38.3	-3.63119
38.4	7.52152		38.4	0.964651		38.4	-0.121131		38.4	-1.28339		38.4	-2.83679
38.5	7.62582		38.5	-1.24712		38.5	-1.24257		38.5	-2.20919		38.5	-3.70679
38.6	7.74016		38.6	-1.43004		38.6	-0.972562		38.6	-2.03317		38.6	-3.32439
38.7	8.02022		38.7	0.201499		38.7	-0.797168		38.7	-1.60388		38.7	-3.2944
38.8	7.43559		38.8	0.709456		38.8	-0.611565		38.8	-1.56746		38.8	-2.69376
38.9	7.75666		38.9	-0.0346433		38.9	-1.08503		38.9	-1.83123		38.9	-1.87254
39	7.96649		39	0.705336		39	-1.01636		39	-1.55032		39	-2.18991
39.1	7.29477		39.1	0.72331		39.1	-1.46465		39.1	-1.41806		39.1	-2.25383
39.2	8.35574		39.2	1.55479		39.2	-1.45479		39.2	-1.28295		39.2	-2.10927
39.3	8.28771		39.3	0.762647		39.3	-0.793321		39.3	-2.64474		39.3	-2.58845
39.4	8.0276		39.4	-1.25812		39.4	0.0752515		39.4	-0.735995		39.4	-3.06103
39.5	8.02932		39.5	-1.10382		39.5	-1.05907		39.5	-1.79816		39.5	-3.6011
39.6	8.38352		39.6	0.445099		39.6	-1.54749		39.6	-1.43456		39.6	-3.35474
39.7	7.95139		39.7	1.47947		39.7	-0.910865		39.7	-0.526849		39.7	-3.2299
39.8	8.24428		39.8	1.09187		39.8	-0.116878		39.8	-2.21582		39.8	-3.74306
39.9	8.23658		39.9	-1.08022		39.9	-0.489488		39.9	-1.41079		39.9	-3.10866
40	8.74663		40	-1.16855		40	-0.393375		40	-1.27498		40	-3.22927
40.1	8.54297		40.1	0.99974		40.1	-0.364772		40.1	-0.79492		40.1	-2.56659
40.2	8.78922		40.2	0.776519		40.2	-0.0993246		40.2	0.453319		40.2	-2.26073
40.3	8.36043		40.3	0.0940938		40.3	-1.31614		40.3	-0.697744		40.3	-1.475
40.4	8.63408		40.4	0.868276		40.4	-0.233873		40.4	-0.895763		40.4	-1.22662
40.5	8.86951		40.5	0.123573		40.5	-0.135835		40.5	-2.24769		40.5	-1.41105
40.6	8.37565		40.6	1.47517		40.6	-1.16672		40.6	-1.41464		40.6	-1.82858
40.7	8.66677		40.7	1.12685		40.7	-1.10602		40.7	-1.34693		40.7	-1.34332
40.8	9.13261		40.8	-0.940254		40.8	0.0622947		40.8	-1.68632		40.8	-2.48867
40.9	8.76304		40.9	-0.415765		40.9	-0.843445		40.9	-2.22499		40.9	-2.62138
41	8.79803		41	1.29551		41	0.309423		41	-0.749145		41	-2.56347
41.1	8.85057		41.1	1.76658		41.1	-0.825881		41.1	-1.18293		41.1	-2.72146
41.2	8.74738		41.2	0.507436		41.2	-0.324662		41.2	-0.658798		41.2	-3.46587
41.3	9.07402		41.3	1.26743		41.3	-0.93401		41.3	-1.18716		41.3	-2.86912
41.4	9.03492		41.4	0.25809		41.4	-1.05966		41.4	-0.195743		41.4	-2.82494
41.5	9.43614		41.5	1.23743		41.5	-0.801558		41.5	-0.78689		41.5	-2.41534
41.6	9.26803		41.6	1.10332		41.6	-1.14759		41.6	-0.567628		41.6	-3.5138
41.7	8.78261		41.7	-0.680714		41.7	-0.568343		41.7	-0.348303		41.7	-3.58743
41.8	8.88996		41.8	-0.73632		41.8	-0.270808		41.8	-0.435236		41.8	-3.39897
41.9	9.26408		41.9	1.31631		41.9	-0.808886		41.9	-0.344826		41.9	-3.29102
42	8.31743		42	0.938416		42	0.108664		42	-0.885457		42	-2.76111
42.1	9.65838		42.1	2.52278		42.1	-0.272616		42.1	-1.58971		42.1	-2.22951
42.2	9.02582		42.2	2.71717		42.2	0.0901892		42.2	-0.876606		42.2	-2.48848
42.3	8.65078		42.3	1.3219		42.3	0.366987		42.3	-0.436185		42.3	-1.76729
42.4	8.64504		42.4	1.38287		42.4	-0.364498		42.4	0.28824		42.4	-2.71623
42.5	9.11526		42.5	0.12581		42.5	-0.241336		42.5	-0.954814		42.5	-3.02706
42.6	9.86826		42.6	-0.345896		42.6	-0.409861		42.6	-1.22674		42.6	-2.5927
42.7	8.89149		42.7	1.39937		42.7	-0.584566		42.7	-2.09405		42.7	-2.03698
42.8	8.96546		42.8	1.6431		42.8	-0.445282		42.8	0.15686		42.8	-1.93932
42.9	9.56548		42.9	0.578654		42.9	-1.18768		42.9	-0.515974		42.9	-2.20319
43	9.41424		43	0.82934		43	0.754734		43	0.615805		43	-2.33146
43.1	9.16641		43.1	0.593434		43.1	-1.6764		43.1	-0.726321		43.1	-1.40037
43.2	9.08126		43.2	1.27064		43.2	-0.686278		43.2	-1.3678		43.2	-0.909086
43.3	9.08919		43.3	1.24432		43.3	0.215614		43.3	-1.25228		43.3	-0.775667
43.4	9.47462		43.4	-0.173855		43.4	0.338402		43.4	0.1702		43.4	-0.934822
43.5	9.45922		43.5	0.551369		43.5	-0.490361		43.5	-1.03536		43.5	-1.41788
43.6	9.31609		43.6	2.40334		43.6	-1.07873		43.6	0.617512		43.6	-2.74429
43.7	9.35517		43.7	2.64074		43.7	0.0380849		43.7	-0.58217		43.7	-2.99053
43.8	9.80348		43.8	1.91101		43.8	0.47128		43.8	-1.07475		43.8	-4.40027
43.9	9.3232		43.9	2.41175		43.9	-0.126341		43.9	-0.0646785		43.9	-3.7766
44	8.99649		44	1.48331		44	-0.0105588		44	-1.33119		44	-3.45999
44.1	9.0444		44.1	2.77823		44.1	0.467769		44.1	0.0261117		44.1	-2.75047
44.2	9.84235		44.2	2.00831		44.2	-0.465902		44.2	-1.23142		44.2	-2.52094
44.3	9.07644		44.3	0.0183881		44.3	-0.0288454		44.3	-1.19861		44.3	-2.57493
44.4	8.82266		44.4	0.405112		44.4	0.109966		44.4	-0.0265542		44.4	-2.62403
44.5	9.27151		44.5	2.35066		44.5	0.126985		44.5	-1.26721		44.5	-2.74507
44.6	9.03876		44.6	3.28334		44.6	0.0310421		44.6	-0.182529		44.6	-3.46217
44.7	8.98862		44.7	2.89222		44.7	0.0993315		44.7	-1.12008		44.7	-2.36272
44.8	9.16932		44.8	1.10799		44.8	-0.707108		44.8	0.0529188		44.8	-1.83361
44.9	9.45279		44.9	0.274201		44.9	-0.0844914		44.9	-1.20619		44.9	-0.700124
45	9.35817		45	1.32743		45	-0.21229		45	0.585205		45	-1.29998
45.1	9.63435		45.1	1.36673		45.1	0.185144		45.1	-1.89648		45.1	-1.36424
45.2	9.34902		45.2	0.00751835		45.2	-0.20789		45.2	-1.07317		45.2	-1.64938
45.3	10.2444		45.3	-0.0337769		45.3	-0.488211		45.3	-2.4459		45.3	-2.64539
45.4	9.33721		45.4	-0.751859		45.4	-0.314494		45.4	-1.06381		45.4	-3.30814
45.5	9.38931		45.5	-0.87185		45.5	0.193802		45.5	-1.72299		45.5	-2.5366
45.6	9.71474		45.6	-1.99345		45.6	-0.683431		45.6	0.517871		45.6	-2.52215
45.7	9.56623		45.7	-4.2138		45.7	-0.797795		45.7	-0.575025		45.7	-1.95213
45.8	9.47958		45.8	-4.68492		45.8	0.332366		45.8	-0.886469		45.8	-2.04421
45.9	9.24813		45.9	-3.95581		45.9	-0.326196		45.9	-1.12887		45.9	-1.49307
46	9.98977		46	-3.72087		46	-0.269871		46	-0.0122655		46	-1.40007
46.1	9.78228		46.1	-4.62164		46.1	-0.355108		46.1	-1.69056		46.1	-1.6394
46.2	9.86035		46.2	-6.78571		46.2	0.117971		46.2	-0.491		46.2	-1.74824
46.3	9.49216		46.3	-6.86976		46.3	0.463195		46.3	-0.0587354		46.3	-1.44749
46.4	9.85716		46.4	-5.15467		46.4	0.944479		46.4	-1.06609		46.4	-1.47252
46.5	9.92317		46.5	-5.57291		46.5	0.401998		46.5	-1.85096		46.5	-1.13156
46.6	9.89687		46.6	-6.18775		46.6	-0.306884		46.6	-0.561938		46.6	-1.38364
46.7	9.88172		46.7	-5.99467		46.7	-0.732145		46.7	0.206744		46.7	-1.4807
46.8	9.87695		46.8	-6.94344		46.8	1.03001		46.8	-0.61277		46.8	-1.01727
46.9	9.3526		46.9	-6.02415		46.9	0.321766		46.9	-0.747565		46.9	-1.07131
47	9.68205		47	-6.85386		47	1.14077		47	-1.1651		47	-0.929998
47.1	9.48638		47.1	-9.03692		47.1	0.0416449		47.1	-1.85494		47.1	-0.682955
47.2	9.51919		47.2	-8.91956		47.2	-0.0246638		47.2	-0.329589		47.2	0.0930358
47.3	9.90708		47.3	-7.81324		47.3	-0.361677		47.3	-0.3557		47.3	-0.837818
47.4	9.65287		47.4	-8.0633		47.4	-0.31632		47.4	-1.40516		47.4	-1.23572
47.5	9.66862		47.5	-9.19064		47.5	-0.185955		47.5	-0.370684		47.5	-1.12989
47.6	9.01921		47.6	-8.96311		47.6	-0.201608		47.6	0.3306		47.6	-1.09028
47.7	9.78705		47.7	-9.79369		47.7	0.605475		47.7	-0.602591		47.7	-1.33553
47.8	9.33414		47.8	-8.76022		47.8	-0.0905525		47.8	-0.980483		47.8	-0.900583
47.9	10.0425		47.9	-8.97424		47.9	-0.433091		47.9	-0.0422971		47.9	0.171702
48	10.0427		48	-10.9706		48	-0.471031		48	-0.298545		48	0.948456
48.1	9.55917		48.1	-11.1271		48.1	0.0842103		48.1	0.251443		48.1	-0.371781
48.2	10.1429		48.2	-9.93548		48.2	1.26592		48.2	-0.359178		48.2	-0.86461
48.3	10.3434		48.3	-10.1552		48.3	0.501114		48.3	-0.0751738		48.3	-1.95479
48.4	10.1736		48.4	-10.3053		48.4	-0.318104		48.4	-1.01684		48.4	-2.12774
48.5	9.68304		48.5	-11.7228		48.5	-0.724068		48.5	-1.24128		48.5	-1.27742
48.6	9.88082		48.6	-11.572		48.6	-1.38861		48.6	-0.250368		48.6	-0.608892
48.7	10.1787		48.7	-10.3068		48.7	0.0109186		48.7	-1.22187		48.7	0.341275
48.8	9.97486		48.8	-10.3705		48.8	0.179519		48.8	-1.19311		48.8	0.862677
48.9	9.82792		48.9	-10.8143		48.9	0.914681		48.9	-0.549356		48.9	0.0717673
49	9.43626		49	-12.2447		49	-0.347693		49	-0.422844		49	-0.518794
49.1	9.6805		49.1	-11.9143		49.1	0.590091		49.1	-1.10775		49.1	-1.56377
49.2	9.99669		49.2	-10.0951		49.2	0.185805		49.2	-0.328198		49.2	-1.09383
49.3	9.685		49.3	-10.3		49.3	0.567965		49.3	-0.224446		49.3	-0.82531
49.4	9.85425		49.4	-11.6627		49.4	0.215947		49.4	-0.349504		49.4	-2.07059
49.5	9.51996		49.5	-11.218		49.5	-0.250553		49.5	-0.620547		49.5	-2.53448
49.6	9.60471		49.6	-11.6915		49.6	0.0229708		49.6	-0.499852		49.6	-2.10646
49.7	10.0963		49.7	-10.516		49.7	0.821756		49.7	-0.210031		49.7	-1.82405
49.8	9.86676		49.8	-10.954		49.8	0.0698071		49.8	0.0206111		49.8	-0.919639
49.9	9.84508		49.9	-12.9827		49.9	0.439683		49.9	-0.555363		49.9	-0.0782762
50	10.28		50	-13.1145		50	0.202498		50	-0.510284		50	0.386896
50.1	9.53044		50.1	-11.752		50.1	-0.0661013		50.1	-0.0898418		50.1	0.174903
50.2	9.46346		50.2	-11.4745		50.2	0.683228		50.2	-0.401601		50.2	-0.566427
50.3	9.56202		50.3	-12.4464		50.3	0.572864		50.3	0.693255		50.3	-1.11091
50.4	10.3763		50.4	-11.6872		50.4	0.73772		50.4	0.720758		50.4	-0.668406
50.5	9.933		50.5	-12.2479		50.5	1.02919		50.5	0.10059		50.5	-0.952594
50.6	9.99555		50.6	-11.3635		50.6	0.919132		50.6	-0.0075237		50.6	-1.26402
50.7	9.69357		50.7	-12.3211		50.7	0.16217		50.7	-0.144721		50.7	-1.84074
50.8	9.64411		50.8	-14.2035		50.8	-0.568037		50.8	0.562317		50.8	-2.86317
50.9	9.84423		50.9	-14.0999		50.9	1.83321		50.9	-0.27452		50.9	-2.90282
51	9.7477		51	-12.4575		51	0.338334		51	-1.55443		51	-3.17626
51.1	9.90272		51.1	-12.1913		51.1	0.216814		51.1	0.360948		51.1	-3.14262
51.2	9.76835		51.2	-12.6129		51.2	0.816851		51.2	0.384341		51.2	-1.79801
51.3	10.0933		51.3	-14.83		51.3	1.18864		51.3	-0.724109		51.3	-1.02531
51.4	9.86788		51.4	-14.9156		51.4	0.226943		51.4	-0.765584		51.4	-0.171518
51.5	10.1887		51.5	-13.3182		51.5	0.36769		51.5	-0.654056		51.5	-0.0140815
51.6	9.7698		51.6	-12.5244		51.6	0.0701956		51.6	0.750283		51.6	-0.203241
51.7	10.2847		51.7	-12.7577		51.7	-0.0666977		51.7	-0.778165		51.7	0.3753
51.8	10.4153		51.8	-14.1846		51.8	1.12298		51.8	-0.0933191		51.8	-0.0223272
51.9	9.31819		51.9	-14.4444		51.9	0.723031		51.9	-0.0563961		51.9	0.419047
52	9.17999		52	-13.0847		52	0.134604		52	-0.761537		52	0.679841
52.1	9.55186		52.1	-12.6636		52.1	0.298229		52.1	-0.72904		52.1	0.250755
52.2	10.1114		52.2	-12.8568		52.2	0.138607		52.2	0.444594		52.2	0.405327
52.3	9.70686		52.3	-12.3662		52.3	0.057402		52.3	0.652602		52.3	-0.616905
52.4	9.09147		52.4	-13.2166		52.4	0.306682		52.4	0.575025		52.4	-1.53026
52.5	9.50162		52.5	-12.682		52.5	1.02209		52.5	0.936479		52.5	-1.38896
52.6	9.54477		52.6	-13.2637		52.6	1.62575		52.6	0.372075		52.6	-1.58542
52.7	9.18362		52.7	-14.8182		52.7	0.22824		52.7	0.929714		52.7	-1.38713
52.8	9.44052		52.8	-14.5974		52.8	0.676695		52.8	0.719872		52.8	-1.94424
52.9	8.53109		52.9	-13.2461		52.9	-0.176596		52.9	0.581791		52.9	-2.53987
53	9.29051		53	-13.4728		53	1.0196		53	-0.480632		53	-1.79088
53.1	7.83826		53.1	-14.2182		53.1	0.268576		53.1	0.141054		53.1	-2.12972
53.2	8.12752		53.2	-13.3211		53.2	0.896722		53.2	-0.383898		53.2	-1.89913
53.3	8.54948		53.3	-13.6857		53.3	-0.0489009		53.3	0.908344		53.3	-1.18239
53.4	8.33384		53.4	-12.8734		53.4	-0.17404		53.4	0.513761		53.4	-0.579165
53.5	7.54947		53.5	-13.4952		53.5	-0.057741		53.5	0.663034		53.5	-0.538962
53.6	8.03057		53.6	-15.3993		53.6	1.38542		53.6	-0.671443		53.6	-0.353774
53.7	8.17127		53.7	-15.2456		53.7	-0.00207979		53.7	0.645205		53.7	0.272806
53.8	7.61464		53.8	-13.5688		53.8	0.647809		53.8	1.10029		53.8	0.869703
53.9	7.54502		53.9	-13.2634		53.9	-0.295683		53.9	-0.020295		53.9	0.292774
54	7.32212		54	-13.7397		54	0.712328		54	0.564593		54	-0.152026
54.1	6.75387		54.1	-15.3624		54.1	-0.230174		54.1	1.54817		54.1	-0.562662
54.2	6.5972		54.2	-15.3579		54.2	0.738338		54.2	0.338061		54.2	-1.01018
54.3	6.76551		54.3	-14.3118		54.3	-0.0559083		54.3	0.764762		54.3	-1.53266
54.4	6.48173		54.4	-13.873		54.4	0.68155		54.4	0.706848		54.4	-1.02763
54.5	6.064		54.5	-14.6238		54.5	0.607697		54.5	-0.544615		54.5	0.556248
54.6	6.52059		54.6	-14.2878		54.6	1.16966		54.6	-0.072708		54.6	1.69745
54.7	5.90278		54.7	-14.281		54.7	-0.451947		54.7	0.734098		54.7	1.28048
54.8	6.74204		54.8	-13.5502		54.8	-0.206972		54.8	-0.58609		54.8	0.78326
54.9	6.36022		54.9	-14.9116		54.9	-0.933785		54.9	0.940462		54.9	0.64436
55	6.00285		55	-14.3617		55	-8.31453		55	0.15098		55	0.300253
55.1	6.75813		55.1	-14.8769		55.1	-11.602		55.1	-6.37251		55.1	-0.523793
55.2	5.70135		55.2	-14.4146		55.2	-12.83		55.2	-9.38572		55.2	-0.410252
55.3	5.64421		55.3	-14.2195		55.3	-13.387		55.3	-10.3055		55.3	0.139167
55.4	4.85595		55.4	-15.6829		55.4	-13.8533		55.4	-10.2364		55.4	0.185866
55.5	4.61645		55.5	-15.9662		55.5	-14.6274		55.5	-10.2182		55.5	-0.947429
55.6	5.39278		55.6	-14.8564		55.6	-13.0878		55.6	-11.3182		55.6	-0.555025
55.7	4.64232		55.7	-14.41		55.7	-14.4113		55.7	-11.5862		55.7	0.0223076
55.8	4.62032		55.8	-15.2219		55.8	-14.5936		55.8	-12.1555		55.8	0.298023
55.9	4.33349		55.9	-14.7866		55.9	-14.8013		55.9	-12.1913		55.9	0.105069
56	4.59326		56	-15.3055		56	-13.7916		56	-11.4504		56	0.575466
56.1	4.92148		56.1	-14.4262		56.1	-14.1593		56.1	-11.7392		56.1	0.838973
56.2	4.52938		56.2	-14.9552		56.2	-13.7997		56.2	-11.0555		56.2	-0.296997
56.3	4.23894		56.3	-15.8094		56.3	-15.3854		56.3	-11.1991		56.3	-1.72453
56.4	4.69217		56.4	-15.6155		56.4	-14.6135		56.4	-12.0282		56.4	-2.42071
56.5	4.2523		56.5	-14.6364		56.5	-13.5407		56.5	-12.1235		56.5	-4.7989
56.6	4.05476		56.6	-14.56		56.6	-14.3165		56.6	-12.6731		56.6	-7.76401
56.7	3.85625		56.7	-15.521		56.7	-13.7011		56.7	-13.3847		56.7	-9.85404
56.8	3.73809		56.8	-15.4983		56.8	-13.9128		56.8	-13.2505		56.8	-11.0427
56.9	3.502		56.9	-15.5756		56.9	-15.0037		56.9	-12.3265		56.9	-10.8101
57	3.33444		57	-14.5522		57	-15.3906		57	-12.7038		57	-11.2102
57.1	3.07103		57.1	-15.0142		57.1	-14.2279		57.1	-12.3393		57.1	-10.2882
57.2	3.19791		57.2	-16.6956		57.2	-14.3037		57.2	-12.2141		57.2	-8.98145
57.3	2.98394		57.3	-16.7036		57.3	-14.6609		57.3	-12.5066		57.3	-8.8561
57.4	3.01068		57.4	-15.2509		57.4	-14.8142		57.4	-13.9395		57.4	-10.3086
57.5	2.87267		57.5	-14.9927		57.5	-14.6031		57.5	-12.5736		57.5	-10.4983
57.6	2.2463		57.6	-15.4428		57.6	-15.1294		57.6	-13.2179		57.6	-11.7134
57.7	1.93846		57.7	-14.8999		57.7	-13.8042		57.7	-12.1309		57.7	-11.6942
57.8	2.19125		57.8	-15.8024		57.8	-14.1047		57.8	-12.7223		57.8	-11.5454
57.9	2.18863		57.9	-14.8578		57.9	-14.8554		57.9	-12.2086		57.9	-11.1392
58	2.57817		58	-15.0966		58	-13.8447		58	-11.8		58	-10.7368
58.1	2.10381		58.1	-17.1402		58.1	-14.4872		58.1	-12.7541		58.1	-10.0737
58.2	1.82688		58.2	-16.8547		58.2	-14.7437		58.2	-13.5623		58.2	-10.7266
58.3	1.30313		58.3	-15.4494		58.3	-15.9069		58.3	-14.2042		58.3	-10.3691
58.4	1.75472		58.4	-15.5568		58.4	-13.7378		58.4	-12.103		58.4	-10.7502
58.5	2.12927		58.5	-16.28		58.5	-15.1192		58.5	-11.8204		58.5	-10.1654
58.6	1.88055		58.6	-15.9864		58.6	-15.551		58.6	-13.908		58.6	-9.94498
58.7	1.70736		58.7	-16.983		58.7	-13.2761		58.7	-12.6455		58.7	-9.92754
58.8	1.33324		58.8	-15.7502		58.8	-14.7134		58.8	-12.7028		58.8	-10.0926
58.9	1.994		58.9	-15.8786		58.9	-15.2325		58.9	-12.2968		58.9	-10.1382
59	1.18683		59	-16.9105		59	-15.3596		59	-12.7483		59	-10.3579
59.1	0.885988		59.1	-16.6621		59.1	-15.1104		59.1	-12.2043		59.1	-9.74539
59.2	1.12019		59.2	-15.5009		59.2	-14.3746		59.2	-12.5839		59.2	-9.64305
59.3	0.548771		59.3	-15.1546		59.3	-14.9038		59.3	-11.5881		59.3	-9.95423
59.4	1.05802		59.4	-16.3842		59.4	-14.625		59.4	-14.1533		59.4	-10.2434
59.5	0.228906		59.5	-15.8011		59.5	-15.9375		59.5	-13.3566		59.5	-10.6057
59.6	0.317572		59.6	-15.9788		59.6	-14.8854		59.6	-12.4837		59.6	-10.4539
59.7	0.35208		59.7	-15.24		59.7	-14.3073		59.7	-12.9257		59.7	-10.6891
59.8	1.07631		59.8	-15.8297		59.8	-14.1768		59.8	-13.1303		59.8	-10.1201
59.9	0.244103		59.9	-17.2831		59.9	-14.9764		59.9	-13.2284		59.9	-9.48833
60	0.276021		60	-17.7161		60	-15.481		60	-13.2763		60	-9.43142
60.1	0.850875		60.1	-15.9655		60.1	-14.5932		60.1	-13.8444		60.1	-9.82449
60.2	0.254242		60.2	-15.5161		60.2	-14.8012		60.2	-13.2904		60.2	-10.36
60.3	-0.380819		60.3	-15.7455		60.3	-15.343		60.3	-12.7294		60.3	-11.1452
60.4	-0.366565		60.4	-15.4687		60.4	-14.6266		60.4	-12.5065		60.4	-11.0893
60.5	0.149822		60.5	-16.3293		60.5	-15.0321		60.5	-12.8865		60.5	-11.1265
60.6	0.0667222		60.6	-15.7523		60.6	-14.6206		60.6	-11.7236		60.6	-10.826
60.7	0.532654		60.7	-16.2056		60.7	-15.1421		60.7	-12.7201		60.7	-11.0396
60.8	-0.395072		60.8	-16.9667		60.8	-15.1349		60.8	-13.0646		60.8	-10.9261
60.9	-0.301131		60.9	-16.6598		60.9	-15.5352		60.9	-14.7003		60.9	-10.1421
61	-0.36538		61	-15.8957		61	-14.4102		61	-13.0401		61	-10.3004
61.1	0.0296973		61.1	-16.4461		61.1	-14.9122		61.1	-13.3534		61.1	-10.2527
61.2	-0.600741		61.2	-17.4244		61.2	-14.501		61.2	-14.1031		61.2	-10.4812
61.3	-1.13329		61.3	-16.6829		61.3	-14.6336		61.3	-14.236		61.3	-10.5416
61.4	1.77236		61.4	-16.2523		61.4	-15.5614		61.4	-12.6368		61.4	-10.3696
61.5	1.68524		61.5	-15.2912		61.5	-14.9444		61.5	-13.2645		61.5	-10.5687
61.6	1.71428		61.6	-16.0364		61.6	-15.0812		61.6	-13.3857		61.6	-10.5305
61.7	2.24182		61.7	-17.6951		61.7	-14.2837		61.7	-13.2206		61.7	-10.3154
61.8	2.62659		61.8	-17.6034		61.8	-14.1515		61.8	-14.4169		61.8	-10.9384
61.9	1.48197		61.9	-16.4879		61.9	-14.5099		61.9	-12.4537		61.9	-10.5354
62	1.98047		62	-15.7209		62	-16.1375		62	-13.4911		62	-10.832
62.1	1.46987		62.1	-16.3218		62.1	-14.616		62.1	-12.8165		62.1	-11.1855
62.2	1.45535		62.2	-15.8643		62.2	-14.3831		62.2	-12.5199		62.2	-10.7706
62.3	1.91029		62.3	-16.2702		62.3	-15.761		62.3	-12.953		62.3	-10.4925
62.4	1.52311		62.4	-16.0077		62.4	-14.6834		62.4	-13.3751		62.4	-10.2653
62.5	1.60054		62.5	-17.061		62.5	-15.3687		62.5	-12.2541		62.5	-10.4126
62.6	1.36581		62.6	-17.8888		62.6	-15.0793		62.6	-13.083		62.6	-10.288
62.7	1.18674		62.7	-17.7232		62.7	-13.4384		62.7	-12.9155		62.7	-10.3834
62.8	1.91029		62.8	-16.3378		62.8	-14.4017		62.8	-13.3303		62.8	-10.145
62.9	0.930224		62.9	-16.5506		62.9	-14.9866		62.9	-13.9032		62.9	-9.94863
63	1.8377		63	-18.1533		63	-15.0421		63	-12.9648		63	-9.9263
63.1	1.48197		63.1	-17.7548		63.1	-14.4101		63.1	-12.8017		63.1	-10.5587
63.2	1.43841		63.2	-17.6462		63.2	-16.275		63.2	-12.7436		63.2	-10.7787
63.3	0.939904		63.3	-16.7823		63.3	-14.8254		63.3	-12.6689		63.3	-9.93137
63.4	1.05122		63.4	-17.197		63.4	-15.4773		63.4	-12.9545		63.4	-9.50522
63.5	1.1335		63.5	-17.3642		63.5	-14.6955		63.5	-13.4141		63.5	-10.0713
63.6	1.47471		63.6	-17.9502		63.6	-14.9089		63.6	-12.7876		63.6	-9.46273
63.7	1.01734		63.7	-16.4102		63.7	-14.9947		63.7	-12.2084		63.7	-9.19649
63.8	0.925384		63.8	-16.3163		63.8	-16.1011		63.8	-13.079		63.8	-9.45626
63.9	1.52069		63.9	-17.9093		63.9	-14.9673		63.9	-13.3804		63.9	-9.61707
64	1.63684		64	-17.4537		64	-15.5218		64	-13.4479		64	-10.0292
64.1	0.961683		64.1	-16.5653		64.1	-15.0172		64.1	-12.8453		64.1	-9.76304
64.2	1.04638		64.2	-15.5998		64.2	-14.1376		64.2	-12.6036		64.2	-10.52
64.3	1.30531		64.3	-15.7713		64.3	-15.4094		64.3	-13.0286		64.3	-11.7108
64.4	1.28111		64.4	-17.9629		64.4	-15.4257		64.4	-11.5128		64.4	-11.4182
64.5	0.584175		64.5	-18.322		64.5	-14.8051		64.5	-13.0206		64.5	-11.2592
64.6	0.0880901		64.6	-17.4563		64.6	-15.2939		64.6	-11.2599		64.6	-11.6544
64.7	0.499477		64.7	-17.4857		64.7	-14.5258		64.7	-11.1511		64.7	-10.6097
64.8	0.596274		64.8	-17.6296		64.8	-16.0667		64.8	-12.2631		64.8	-9.7589
64.9	0.356702		64.9	-16.7288		64.9	-15.3464		64.9	-11.0034		64.9	-9.48747
65	0.468018		65	-17.3787		65	-14.7794		65	-10.6678		65	-9.85289
65.1	0.644673		65.1	-16.3286		65.1	-14.8803		65.1	-9.11626		65.1	-10.8798
65.2	0.763249		65.2	-17.2499		65.2	-15.334		65.2	-10.0587		65.2	-10.7828
65.3	1.0246		65.3	-19.0169		65.3	-14.6421		65.3	-8.56519		65.3	-11.5964
65.4	1.00766		65.4	-18.8603		65.4	-14.687		65.4	-9.01004		65.4	-12.696
65.5	0.823747		65.5	-17.1158		65.5	-15.4216		65.5	-9.33476		65.5	-12.5687
65.6	0.954423		65.6	-16.4575		65.6	-15.4867		65.6	-7.60001		65.6	-11.941
65.7	0.833427		65.7	-16.5894		65.7	-14.8115		65.7	-6.48271		65.7	-12.3842
65.8	0.908445		65.8	-17.829		65.8	-15.9113		65.8	-5.71403		65.8	-12.2696
65.9	0.697911		65.9	-17.9386		65.9	-15.9171		65.9	-5.45917		65.9	-12.8018
66	0.843107		66	-16.7661		66	-14.8648		66	-5.90983		66	-13.1031
66.1	0.944743		66.1	-16.813		66.1	-16.2522		66.1	-4.6602		66.1	-12.1615
66.2	0.576915		66.2	-17.8763		66.2	-14.054		66.2	-5.76454		66.2	-10.9317
66.3	0.596274		66.3	-17.7664		66.3	-15.5057		66.3	-4.3303		66.3	-11.066
66.4	1.00282		66.4	-18.2063		66.4	-14.031		66.4	-4.96823		66.4	-10.3924
66.5	0.327663		66.5	-17.2136		66.5	-13.9469		66.5	-5.82574		66.5	-10.9835
66.6	1.03912		66.6	-17.2397		66.6	-12.8302		66.6	-5.96857		66.6	-10.7995
66.7	0.978622		66.7	-17.9913		66.7	-13.1911		66.7	-6.00145		66.7	-10.9585
66.8	0.286524		66.8	-17.7778		66.8	-10.8676		66.8	-3.95664		66.8	-11.3798
66.9	1.11898		66.9	-16.8473		66.9	-9.01017		66.9	-3.95279		66.9	-10.8938
67	0.864886		67	-16.7049		67	-8.97749		67	-4.76579		67	-10.2267
67.1	0.896345		67.1	-17.6643		67.1	-7.11086		67.1	-4.91228		67.1	-11.1352
67.2	0.344602		67.2	-17.6633		67.2	-6.68595		67.2	-4.16693		67.2	-10.5468
67.3	0.869726		67.3	-17.9569		67.3	-6.76825		67.3	-3.06164		67.3	-10.764
67.4	0.860046		67.4	-16.9464		67.4	-5.12362		67.4	-4.79841		67.4	-9.33117
67.5	0.615634		67.5	-16.9956		67.5	-4.418		67.5	-3.39022		67.5	-8.59569
67.6	0.787448		67.6	-18.4461		67.6	-5.41477		67.6	-4.33883		67.6	-7.82657
67.7	0.835847		67.7	-18.1731		67.7	-3.13708		67.7	-3.92541		67.7	-6.84668
67.8	0.918124		67.8	-16.946		67.8	-3.38801		67.8	-3.7413		67.8	-5.91414
67.9	0.758409		67.9	-16.7847		67.9	-5.02459		67.9	-2.62988		67.9	-5.24221
68	0.601114		68	-17.4362		68	-1.75266		68	-2.54642		68	-4.29069
68.1	0.73663		68.1	-17.2433		68.1	-1.14848		68.1	-3.31485		68.1	-3.7628
68.2	0.823747		68.2	-18.4107		68.2	-1.64821		68.2	-3.58571		68.2	-3.27438
68.3	0.0808303		68.3	-17.1531		68.3	-2.61756		68.3	-2.37572		68.3	-3.02104
68.4	0.760829		68.4	-17.2901		68.4	-0.983169		68.4	-4.24065		68.4	-2.18129
68.5	1.02944		68.5	-18.6963		68.5	-0.696453		68.5	-3.1561		68.5	-2.56788
68.6	1.5715		68.6	-18.8643		68.6	-0.320993		68.6	-4.20126		68.6	-2.94931
68.7	1.05122		68.7	-18.0467		68.7	-1.77712		68.7	-1.77496		68.7	-3.19816
68.8	1.10204		68.8	-17.8431		68.8	-0.524135		68.8	-2.4954		68.8	-2.84021
68.9	0.538196		68.9	-18.2662		68.9	0.468587		68.9	-1.68898		68.9	-3.23562
69	0.458339		69	-17.4836		69	0.415268		69	-2.96554		69	-3.36788
69.1	1.35613		69.1	-17.7506		69.1	-1.08084		69.1	-2.42073		69.1	-2.59471
69.2	1.09962		69.2	-17.0357		69.2	1.06236		69.2	-2.45089		69.2	-2.32604
69.3	1.2061		69.3	-17.2557		69.3	-1.8616		69.3	-2.06642		69.3	-2.63813
69.4	1.07542		69.4	-18.7574		69.4	0.256489		69.4	-2.77454		69.4	-2.99558
69.5	1.11414		69.5	-18.9027		69.5	-0.48872		69.5	-2.40771		69.5	-3.04074
69.6	1.31257		69.6	-17.5138		69.6	1.43078		69.6	-3.37605		69.6	-2.6409
69.7	1.1577		69.7	-17.5238		69.7	0.537169		69.7	-4.04889		69.7	-2.63783
69.8	0.818907		69.8	-18.4705		69.8	0.495748		69.8	-2.86065		69.8	-2.40577
69.9	1.14802		69.9	-17.8495		69.9	0.966972		69.9	-1.3824		69.9	-2.11585
70	0.303463		70	-18.2891		70	-0.433131		70	-3.68731		70	-2.36866
70.1	0.298624		70.1	-17.4452		70.1	0.200629		70.1	-2.14843		70.1	-1.75283
70.2	0.73663		70.2	-17.7057		70.2	-0.692837		70.2	-1.7608		70.2	-1.46821
70.3	0.356702		70.3	-17.8963		70.3	1.69376		70.3	-2.53757		70.3	-1.17546
70.4	0.855206		70.4	-18.2857		70.4	0.54916		70.4	-1.93884		70.4	-0.816046
70.5	1.20852		70.5	-17.0788		70.5	0.146947		70.5	-1.31956		70.5	-0.781397
70.6	0.608374		70.6	-17.0878		70.6	0.303848		70.6	-2.05827		70.6	-0.549406
			70.7	-18.1124		70.7	-0.580991		70.7	-3.59993		70.7	0.706161
			70.8	-17.8562		70.8	0.478397		70.8	-1.47597		70.8	0.550488
			70.9	-17.2017		70.9	0.568857		70.9	-1.87719		70.9	0.199873
			71	-17.4538		71	1.40078		71	-0.786258		71	-0.366453
			71.1	-18.4122		71.1	1.09023		71.1	-2.47131		71.1	-2.39967
			71.2	-18.5738		71.2	0.893188		71.2	-2.40132		71.2	-2.4144
			71.3	-18.6357		71.3	1.95296		71.3	-3.00227		71.3	-3.2667
			71.4	-17.782		71.4	1.14853		71.4	-2.33525		71.4	-2.78581
			71.5	-17.6761		71.5	1.18617		71.5	-1.98727		71.5	-1.58336
			71.6	-19.2966		71.6	1.69479		71.6	-1.08544		71.6	-0.990695
			71.7	-18.9013		71.7	1.22726		71.7	-3.2099		71.7	-0.528438
			71.8	-17.8336		71.8	0.85713		71.8	-2.19351		71.8	-1.14609
			71.9	-16.9497		71.9	1.31965		71.9	-2.1978		71.9	-1.86661
			72	-17.3349		72	0.729313		72	-1.79772		72	-0.754934
			72.1	-18.7565		72.1	0.840582		72.1	-1.67494		72.1	-1.2573
			72.2	-18.5856		72.2	1.3781		72.2	-1.00558		72.2	-1.36961
			72.3	-17.0903		72.3	0.581272		72.3	-2.10253		72.3	-1.02544
			72.4	-16.2764		72.4	1.96668		72.4	-2.024		72.4	-0.396589
			72.5	-15.7861		72.5	0.236461		72.5	-2.42029		72.5	0.587797
			72.6	-17.1384		72.6	1.76157		72.6	-1.79538		72.6	-0.423901
			72.7	-16.679		72.7	1.41762		72.7	-1.57865		72.7	-0.932691
			72.8	-14.2719		72.8	1.75235		72.8	-1.63043		72.8	-1.08632
			72.9	-14.0942		72.9	1.94971		72.9	-1.52377		72.9	-1.74105
			73	-14.0435		73	2.23288		73	-2.81627		73	-1.95875
			73.1	-12.3615		73.1	1.06669		73.1	-0.73688		73.1	-1.62384
			73.2	-13.088		73.2	1.77964		73.2	-1.55064		73.2	-1.10424
			73.3	-12.1675		73.3	1.02856		73.3	-1.95793		73.3	-0.0399007
			73.4	-12.0475		73.4	1.82054		73.4	-0.009863		73.4	-0.93432
			73.5	-13.573		73.5	1.5466		73.5	-2.14963		73.5	-1.15187
			73.6	-12.2869		73.6	1.71694		73.6	-1.98082		73.6	-1.60959
			73.7	-9.42056		73.7	2.52875		73.7	-0.730557		73.7	-1.98333
			73.8	-8.93546		73.8	1.56187		73.8	-1.05717		73.8	-1.66515
			73.9	-9.6043		73.9	1.7802		73.9	-2.20666		73.9	-0.635017
			74	-8.99001		74	0.167987		74	-1.14676		74	-0.232581
			74.1	-9.3193		74.1	1.41661		74.1	-1.18173		74.1	0.0452135
			74.2	-7.83245		74.2	0.791455		74.2	1.24887		74.2	-0.42283
			74.3	-7.12724		74.3	1.31315		74.3	-1.11679		74.3	0.0232135
			74.4	-8.54692		74.4	3.05662		74.4	-2.16727		74.4	-1.0141
			74.5	-7.78998		74.5	1.41987		74.5	-0.130116		74.5	-1.50238
			74.6	-5.74358		74.6	2.33212		74.6	0.209273		74.6	-1.17585
			74.7	-4.89895		74.7	1.95169		74.7	0.077766		74.7	-0.619849
			74.8	-4.91719		74.8	1.17729		74.8	-1.52883		74.8	-0.946565
			74.9	-5.95252		74.9	1.02779		74.9	-1.13241		74.9	-0.999963
			75	-6.00622		75	1.81215		75	-0.859409
			75.1	-4.53434		75.1	1.94892		75.1	-1.02246
			75.2	-4.154		75.2	2.82145		75.2	-1.36166
			75.3	-4.13456		75.3	0.925094		75.3	-0.637175
			75.4	-5.56699		75.4	1.81073		75.4	-1.00116
			75.5	-5.09302		75.5	0.52097		75.5	-0.433024
			75.6	-3.2073		75.6	0.337593		75.6	0.153382
			75.7	-3.1198		75.7	2.71494		75.7	-0.229252
			75.8	-4.06857		75.8	1.51931		75.8	-0.708239
			75.9	-2.92007		75.9	0.904337		75.9	-1.03821
			76	-3.57561		76	1.54104		76	-1.26076
			76.1	-2.28561		76.1	1.44036		76.1	-0.90101
			76.2	-2.75712		76.2	2.34534		76.2	-0.897723
			76.3	-4.26888		76.3	1.37122		76.3	-0.857891
			76.4	-3.66966		76.4	1.81622		76.4	-0.920357
			76.5	-1.22467		76.5	2.02208		76.5	-1.05496
			76.6	-0.948623		76.6	1.42526		76.6	-0.938186
			76.7	-1.92562		76.7	1.32383		76.7	-1.29477
			76.8	-1.5084		76.8	1.30606		76.8	-0.698819
			76.9	-2.09584		76.9	1.70232		76.9	0.269273
			77	-1.05844		77	2.07705		77	-0.60746
			77.1	-1.51183		77.1	1.70756		77.1	-0.195743
			77.2	-3.37075		77.2	1.67894		77.2	-1.91943
			77.3	-3.28445		77.3	0.584941		77.3	-0.0400842
			77.4	-1.7735		77.4	0.616666		77.4	-0.814709
			77.5	-1.05159		77.5	0.735901		77.5	0.0360379
			77.6	-1.52217		77.6	1.60108		77.6	0.366701
			77.7	-3.09236		77.7	1.05051		77.7	-0.132898
			77.8	-3.33719		77.8	3.36654		77.8	-1.18432
			77.9	-1.95719		77.9	1.01475		77.9	-1.14955
			78	-1.2824		78	1.65333		78	-0.0829504
			78.1	-1.23421		78.1	1.19494		78.1	0.337492
			78.2	-2.97761		78.2	0.60822		78.2	-0.140864
			78.3	-2.35968		78.3	2.05213		78.3	-0.151359
			78.4	-0.870114		78.4	1.58315		78.4	-1.13178
			78.5	-0.812516		78.5	1.78578		78.5	-0.668092
			78.6	-1.16807		78.6	1.84192		78.6	0.346659
			78.7	-0.777408		78.7	2.29384		78.7	-0.392876
			78.8	-2.01375		78.8	0.635296		78.8	-0.282992
			78.9	-0.8117		78.9	1.44343		78.9	0.493403
			79	-1.20429		79	1.8028		79	-0.219325
			79.1	-2.86016		79.1	1.91552		79.1	0.51414
			79.2	-2.18239		79.2	1.06198
			79.3	-0.171553		79.3	2.1247
			79.4	-0.488808		79.4	1.6303
			79.5	-1.28367		79.5	1.20619
			79.6	-0.974313		79.6	1.44294
			79.7	-1.52233		79.7	1.28032
			79.8	-0.0341456		79.8	1.98472
			79.9	-0.0930513		79.9	1.13769
			80	-2.02769		80	2.05135
			80.1	-1.65304
			80.2	-0.253137
			80.3	0.0283181
			80.4	-0.177771
			80.5	-1.73759
			80.6	-1.88294
			80.7	-0.235581
			80.8	0.0631774
			80.9	-0.74884
			81	-0.736228
			81.1	-0.918293
			81.2	0.208029
			81.3	-0.108637
			81.4	-1.6545
			81.5	-1.55278
			81.6	-0.891411
			81.7	0.0818738
			81.8	-0.0309243
			81.9	-1.68351
			82	-1.52794
			82.1	0.194418
			82.2	0.122271
			82.3	-0.487104
			82.4	-2.39145
			82.5	-1.61185
			82.6	0.893178
			82.7	2.343
			82.8	2.14228
			82.9	-0.379932
			83	-0.26761
			83.1	1.75507
			83.2	1.59314
			83.3	1.12558
			83.4	1.8149
			83.5	0.692657
			83.6	2.35318
			83.7	1.76946
			83.8	-0.264776
			83.9	0.219996
			84	1.9613
			84.1	2.33708
			84.2	1.90398
			84.3	1.50576
			84.4	0.950075
			84.5	2.37766
			84.6	2.17138
			84.7	0.521929
			84.8	0.810376
			84.9	1.49703
			85	2.19851
			85.1	2.24086
			85.2	0.392605
			85.3	0.36879
			85.4	1.68052
			85.5	1.44645
			85.6	1.53799
			85.7	-0.215461
			85.8	-0.0501315
			85.9	2.48406
			86	2.60712
			86.1	1.76686
			86.2	2.522
			86.3	1.39583
			86.4	2.17513
			86.5	1.46703
			86.6	-0.698014
			86.7	0.0874179
			86.8	2.27272
			86.9	2.52021
			87	1.40276
			87.1	1.6818
			87.2	1.20647
			87.3	2.65627
			87.4	2.45231
			87.5	0.17256
			87.6	0.304239
			87.7	1.84973
			87.8	2.44505
			87.9	2.04504
			88	0.904153
			88.1	-1.02566

## Sheet: Ext Data Fig 6b
Time (s)	T84		Time (s)	F188		Time (s)	A414		Time (s)	P415		Time (s)	N419
0	0.489822		0	-0.109155		0	-3.4268		0	4.61492		0	1.66077
0.1	-0.666848		0.1	-1.42299		0.1	0.137238		0.1			0.1	0.591706
0.2	-0.0583103		0.2	-0.322146		0.2	1.24484		0.2			0.2	0.698541
0.3	-0.325933		0.3	0.118224		0.3	1.6355		0.3	-3.64558		0.3	-0.404553
0.4	-0.34603		0.4	0.541109		0.4	0.057377		0.4			0.4	-1.05171
0.5	-0.249348		0.5	0.546965		0.5	0.665735		0.5			0.5	-2.52665
0.6	0.375597		0.6	-0.0599652		0.6	1.55697		0.6	-1.16039		0.6	-0.873635
0.7	0.573219		0.7	0.163817		0.7	1.43194		0.7			0.7	-0.828656
0.8	-0.273703		0.8	-0.263335		0.8	-1.1489		0.8			0.8	-1.24534
0.9	0.481533		0.9	0.807472		0.9	-0.982513		0.9	0.191056		0.9	-0.727045
1	-1.14436		1	1.40261		1	0.235696		1			1	0.511868
1.1	0.15623		1.1	1.40043		1.1	-0.711035		1.1			1.1	-0.455847
1.2	-0.600141		1.2	-1.67103		1.2	0.433188		1.2	3.71468		1.2	-1.90987
1.3	-0.128707		1.3	0.34485		1.3	2.62265		1.3			1.3	-2.22016
1.4	-1.16712		1.4	1.33351		1.4	0.64075		1.4			1.4	-1.05944
1.5	-0.0376454		1.5	0.630371		1.5	-0.477805		1.5	-2.3807		1.5	-1.53608
1.6	-0.913237		1.6	0.822698		1.6	-0.585588		1.6			1.6	-2.95427
1.7	-0.341034		1.7	0.809815		1.7	0.195974		1.7			1.7	-1.64872
1.8	-0.595996		1.8	0.560685		1.8	0.792936		1.8	-0.966664		1.8	-1.43385
1.9	-1.69936		1.9	1.36153		1.9	1.49917		1.9			1.9	-2.42737
2	0.0139602		2	0.204474		2	1.55679		2			2	-3.08716
2.1	0.547502		2.1	0.299424		2.1	0.813971		2.1	3.42897		2.1	-1.2255
2.2	-0.143865		2.2	0.879668		2.2	1.48981		2.2			2.2	-1.33448
2.3	-1.27811		2.3	1.58406		2.3	2.05603		2.3			2.3	-1.81841
2.4	-0.373678		2.4	2.29439		2.4	2.09497		2.4	-1.24717		2.4	-1.94767
2.5	0.747963		2.5	0.796346		2.5	-0.11814		2.5			2.5	-0.400473
2.6	0.171786		2.6	-0.253547		2.6	0.814848		2.6	-1.36498		2.6	-0.827078
2.7	0.291177		2.7	0.0872708		2.7	1.90963		2.7			2.7	-2.0185
2.8	-0.0185133		2.8	1.40478		2.8	0.196891		2.8	0.280874		2.8	-0.907953
2.9	-0.985621		2.9	0.378229		2.9	0.411473		2.9			2.9	-0.720697
3	-0.177929		3	1.18276		3	1.94094		3	4.1594		3	-1.41887
3.1	0.238039		3.1	0.360327		3.1	0.834968		3.1			3.1	-1.99922
3.2	-2.53481		3.2	0.707335		3.2	-0.202898		3.2	-0.745751		3.2	-0.577494
3.3	-0.897114		3.3	1.87201		3.3	0.239375		3.3			3.3	-0.631166
3.4	-1.34578		3.4	-0.781673		3.4	-0.942657		3.4	-0.16707		3.4	-1.62637
3.5	-1.55237		3.5	-0.524679		3.5	-0.64714		3.5			3.5	-1.71465
3.6	-1.01855		3.6	1.21572		3.6	0.387476		3.6	4.23707		3.6	-0.241097
3.7	-1.51831		3.7	0.130521		3.7	0.922903		3.7			3.7	-1.0565
3.8	-0.463491		3.8	2.77148		3.8	0.356472		3.8	-1.12684		3.8	-1.90835
3.9	-0.194449		3.9	0.812826		3.9	1.20032		3.9			3.9	-1.21675
4	-0.185593		4	1.94228		4	-0.210713		4	-0.51133		4	-0.784724
4.1	-0.861121		4.1	1.12679		4.3	-0.774451		4.1			4.1	-0.90572
4.2	-0.328942		4.2	1.82817		4.4	0.328923		4.2	-0.834913		4.2	-1.87431
4.3	0.286862		4.3	2.2339		4.5	-0.268743		4.3			4.3	-0.939487
4.4	-1.19761		4.4	1.52081		4.6	1.16084		4.4	3.5075		4.4	-0.482631
4.5	0.0677231		4.5	1.62137		4.7	0.467566		4.5			4.5	-1.38665
4.6	0.404096		4.6	2.32501		4.8	-0.191345		4.6	-1.41364		4.6	-1.49985
4.7	-0.0724465		4.7	1.82432		4.9	0.215504		4.7			4.7	-0.197881
4.8	0.700445		4.8	2.08826		5	1.41072		4.8	-1.52575		4.8	-0.785987
4.9	0.0341142		4.9	1.8004		5.1	-0.813686		4.9			4.9	-1.38207
5	0.484769		5	1.39675		5.2	-1.10492		5	4.61119		5	-1.5705
5.1	-1.16655		5.1	0.026285		5.3	0.031929		5.1			5.1	-1.48002
5.2	0.633738		5.2	1.27051		5.6	2.05152		5.2	-1.45946		5.2	-1.42643
5.3	-0.0261775		5.3	0.352798		5.7	0.295805		5.3			5.3	-3.18853
5.4	-1.66444		5.4	1.38546		5.8	-0.191345		5.4	-0.681556		5.4	-1.36473
5.5	1.4533		5.5	2.34483		5.9	0.215504		5.5			5.5	-0.986833
5.6	0.405459		5.6	1.17531		6	1.41072		5.6	-0.424828		5.6	-1.671
5.7	-0.437716		5.7	1.11232		6.1	-0.285123		5.7			5.7	-1.52553
5.8	0.228671		5.8	-0.399863		6.2	-3.32682		5.8	3.1727		5.8	-0.691617
5.9	-0.393378		5.9	-1.51392		6.5	-2.5851		5.9			5.9	-1.29665
6	-0.210175		6	-0.294957		6.6	0.820613		6	-1.18994		6	-1.74225
6.1	-0.252527		6.1	-1.31239		6.7	1.41072		6.1			6.1	-2.25709
6.2	-1.75647		6.2	-0.78276		6.8	-0.813686		6.2	-0.459493		6.2	-0.599599
6.3	-0.664463		6.3	0.172517		6.9	-1.16143		6.3	4.27117		6.3	-1.15563
6.4	1.03756		6.4	-1.7234		7	0.782782		6.4	-0.244761		6.4	-2.45245
6.5	0.888417		6.5	-1.47268		7.1	0.309241		6.5	-0.0601491		6.5	-1.14293
6.6	0.617785		6.6	-2.02063		7.2	-3.09206		6.6	0.831141		6.6	-1.25609
6.7	0.934345		6.7	-1.78664		7.5	0.0285327		6.7	1.28243		6.7	-1.89488
6.8	-0.377992		6.8	-2.4451		7.6	0.786135		6.8	-6.38947		6.8	-1.4104
6.9	-0.478649		6.9	-0.574204		7.7	-0.191345		6.9	-8.24589		6.9	-0.182571
7	-0.197742		7	-2.23906		7.8	0.215504		7	-5.20086		7	-0.331979
7.1	0.822107		7.1	-2.25211		7.9	1.41072		7.1	-9.6955		7.1	-1.47249
7.2	-1.14384		7.2	-1.44934		8	-0.285123		7.2	-9.78076		7.2	-1.91008
7.3	-0.163679		7.3	-2.77689		8.1	-3.32682		7.3	-8.5942		7.3	-0.692855
7.4	-0.672014		7.4	-4.27669		8.4	-2.5851		7.4	-6.58576		7.4	-1.09512
7.5	-1.21129		7.5	-3.06115		8.5	0.820613		7.5	-9.46711		7.5	-1.92445
7.6	-2.41059		7.6	-2.43122		8.6	1.41072		7.6	-9.35667		7.6	-0.449953
7.7	-1.34323		7.7	-3.45401		8.7	-0.813686		7.7	-5.51203		7.7	-0.817451
7.8	-1.74018		7.8	-4.34646		8.8	-1.09976		7.8	-10.5235		7.8	-1.72697
7.9	-2.14575		7.9	-5.47072		8.9	0.0457819		7.9	-9.68287		7.9	-2.68633
8	-2.64943		8	-3.17777		9.2	1.86461		8	-8.52396		8	-1.80326
8.1	-1.67631		8.1	-3.99861		9.3	0.190662		8.1	-7.48262		8.1	-1.45845
8.2	-3.36402		8.2	-5.54275		9.4	-0.211467		8.2	-9.38738		8.2	-1.88928
8.3	-2.00746		8.3	-3.12632		9.5	-0.643904		8.3	-9.12717		8.3	-1.67219
8.4	-3.78197		8.4	-4.32814		9.6	1.27285		8.4	-6.78592		8.4	0.0972171
8.5	-1.26284		8.5	-4.93038		9.7	1.44151		8.5	-9.98019		8.5	-0.922114
8.6	-3.29709		8.6	-3.77709		9.8	0.697695		8.6	-9.01864		8.6	-1.60819
8.7	-2.492		8.7	-4.89115		9.9	2.6864		8.7	-5.41518		8.7	-1.2946
8.8	-2.17352		8.8	-4.45345		10.1	2.69483		8.8	-9.28753		8.8	-1.55014
8.9	-2.16608		8.9	-4.36729		10.2	0.651261		8.9	-9.04607		8.9	-2.03839
9	-3.99833		9	-4.42685		10.4	-1.10727		9	-9.45309		9	-3.20141
9.1	-3.38406		9.1	-4.08101		10.5	0.347426		9.1	-6.22276		9.1	-1.71442
9.2	-3.90063		9.2	-4.15446		10.6	-0.268743		9.2	-9.61924		9.2	-1.17353
9.3	-4.63474		9.3	-3.61153		10.7	1.16084		9.3	-10.1631		9.3	-1.82787
9.4	-3.44526		9.4	-5.26869		10.8	0.467566		9.4	-5.68943		9.4	-0.970751
9.5	-4.96044		9.5	-6.43269		10.9	-0.191345		9.5			9.5	0.589123
9.6	-4.4005		9.6	-3.76354		11	0.215504		9.6	-11.24		9.6	-0.144194
9.7	-5.24056		9.7	-5.25213		11.1	1.41072		9.7			9.7	-0.544284
9.8	-5.21052		9.8	-4.23185		11.2	-0.813686		9.8	-10.0724		9.8	-0.458675
9.9	-4.86711		9.9	-4.66368		11.3	-1.16143		9.9			9.9	0.443083
10	-4.96016		10	-5.16889		11.4	0.782782		10	-9.06133		10	0.234912
10.1	-3.90727		10.1	-5.51564		11.5	-0.211467		10.1			10.1	-1.29096
10.2	-5.53424		10.2	-5.36096		11.6	-0.643904		10.2	-6.16796		10.2	-0.0254411
10.3	-4.95573		10.3	-5.14873		11.7	1.27285		10.3			10.3	-0.440461
10.4	-4.38608		10.4	-5.72587		11.8	1.44151		10.4	-9.76295		10.4	-2.82503
10.5	-4.54209		10.5	-4.53452		11.9	1.11593		10.5			10.5	-4.05403
10.6	-4.19539		10.6	-5.64138		12	1.10801		10.6	-8.98393		10.6	-4.05326
10.7	-4.22196		10.7	-5.71943		12.1	-0.213303		10.7			10.7	-4.99154
10.8	-5.79187		10.8	-5.4606		12.2	-1.06307		10.8	-5.37457		10.8	-6.02256
10.9	-4.18903		10.9	-4.57283		12.3	0.10878		10.9			10.9	-6.314
11	-6.16077		11	-5.73717		12.4	3.01939		11	-10.268		11	-5.41898
11.1	-4.99859		11.1	-5.57897		12.5	2.96536		11.1			11.1	-5.96796
11.2	-6.20653		11.2	-5.60231		12.6	0.553777		11.2	-9.69697		11.2	-8.12051
11.3	-5.23454		11.3	-5.64832		12.7	0.0187434		11.3			11.3	-7.35128
11.4	-5.69172		11.4	-6.72516		12.8	-0.082915		11.4	-9.15887		11.4	-7.34282
11.5	-4.9052		11.5	-5.53447		12.9	-2.79978		11.5			11.5	-8.19757
11.6	-6.87133		11.6	-5.45098		13	-4.44991		11.6	-6.61618		11.6	-7.81004
11.7	-5.78165		11.7	-7.17389		13.1	-2.89006		11.7			11.7	-5.51851
11.8	-6.22277		11.8	-7.67366		13.2	-4.40187		11.8	-10.4182		11.8	-5.48817
11.9	-6.41903		11.9	-6.61515		13.3	-4.64198		11.9			11.9	-5.84418
12	-6.25842		12	-5.58265		13.4	-4.03809		12	-9.83842		12	-6.73016
12.1	-4.7505		12.1	-4.81025		13.5	-4.84792		12.1			12.1	-6.09244
12.2	-6.28482		12.2	-5.58558		13.6	-5.17591		12.2	-5.15641		12.2	-7.53332
12.3	-4.99559		12.3	-6.4864		13.7	-5.23914		12.3			12.3	-9.5214
12.4	-6.52939		12.4	-6.07405		13.8	-4.97822		12.4	-11.0877		12.4	-8.49604
12.5	-7.09285		12.5	-5.89177		13.9	-5.37594		12.5			12.5	-8.22208
12.6	-5.94464		12.6	-7.25462		14	-4.57763		12.6	-9.73987		12.6	-8.68634
12.7	-5.96644		12.7	-7.06472		14.1	-4.85072		12.7			12.7	-8.45837
12.8	-5.80021		12.8	-5.94296		14.2	-5.15686		12.8	-10.2125		12.8	-7.32855
12.9	-6.09974		12.9	-6.28688		14.3	-6.00508		12.9			12.9	-7.27467
13	-5.1265		13	-7.51195		14.4	-5.19752		13	-5.58051		13	-8.28202
13.1	-6.93468		13.1	-7.03435		14.5	-4.68613		13.1	-9.94998		13.1	-9.02092
13.2	-6.11172		13.2	-6.16742		14.6	-6.10868		13.2	-9.095		13.2	-7.78426
13.3	-6.83959		13.3	-4.92519		14.7	-6.19765		13.3	-4.68302		13.3	-8.40351
13.4	-6.70357		13.4	-5.9141		14.8	-4.93654		13.4	-9.89781		13.4	-8.86328
13.5	-7.21105		13.5	-6.13086		14.9	-6.79484		13.5	-9.35622		13.5	-7.14415
13.6	-6.75523		13.6	-6.25116		15	-5.97048		13.6	-8.84303		13.6	-6.84906
13.7	-6.59735		13.7	-6.15119		15.1	-4.46609		13.7	-6.01503		13.7	-7.06379
13.8	-6.64543		13.8	-7.01076		15.2	-4.94186		13.8	-10.8598		13.8	-8.13468
13.9	-6.9164		13.9	-6.41629		15.3	-6.46864		13.9	-10.6787		13.9	-7.46568
14	-7.23438		14	-7.13825		15.4	-5.5701		14	-5.61554		14	-7.48108
14.1	-7.12311		14.1	-6.8094		15.5	-6.01267		14.1	-12.0672		14.1	-8.71102
14.2	-6.16384		14.2	-4.38218		15.6	-5.66181		14.2	-10.8056		14.2	-8.75306
14.3	-6.77487		14.3	-6.54337		15.7	-5.27585		14.3	-9.71027		14.3	-7.00917
14.4	-6.94604		14.4	-7.095		15.8	-5.05776		14.4	-6.49719		14.4	-7.77554
14.5	-6.71963		14.5	-6.44549		15.9	-5.82683		14.5	-11.1995		14.5	-8.42131
14.6	-7.41157		14.6	-5.85353		16	-5.89216		14.6	-10.2443		14.6	-7.96607
14.7	-6.29515		14.7	-5.72194		16.1	-4.36382		14.7	-4.77355		14.7	-7.08922
14.8	-6.67217		14.8	-6.17327		16.2	-3.6392		14.8	-10.845		14.8	-7.31058
14.9	-6.26296		14.9	-5.47616		16.3	-5.24639		14.9	-10.7735		14.9	-8.45972
15	-7.49394		15	-6.73118		16.4	-6.11568		15	-7.94359		15	-7.53075
15.1	-6.87576		15.1	-6.03817		16.5	-5.63541		15.1	-3.32959		15.1	-7.1251
15.2	-6.83329		15.2	-6.75335		16.6	-7.2539		15.2	-7.45844		15.2	-8.11492
15.3	-7.51756		15.3	-6.61791		16.7	-7.34849		15.3	-6.68728		15.3	-8.09602
15.4	-7.58909		15.4	-8.28987		16.8	-5.26251		15.4	-1.88786		15.4	-6.70957
15.5	-7.73818		15.5	-6.88946		16.9	-5.28381		15.5	-7.57383		15.5	-7.26816
15.6	-7.23064		15.6	-6.16491		17	-4.89921		15.6	-6.06746		15.6	-8.07276
15.7	-7.90026		15.7	-7.20166		17.1	-4.61822		15.7	-4.10065		15.7	-8.72631
15.8	-7.88868		15.8	-7.3443		17.2	-4.84964		15.8	-1.91064		15.8	-8.19955
15.9	-8.19519		15.9	-7.6197		17.3	-5.78664		15.9	-4.40174		15.9	-8.86727
16	-8.80878		16	-5.77214		17.4	-5.99332		16	-4.43608		16	-10.0188
16.1	-7.56973		16.1	-8.82352		17.5	-5.35891		16.1	0.0233404		16.1	-8.19718
16.2	-8.81877		16.2	-6.18189		17.6	-5.72946		16.2	-5.97294		16.2	-7.90565
16.3	-7.06287		16.3	-7.14043		17.7	-6.0848		16.3	-3.19854		16.3	-8.05082
16.4	-8.17379		16.4	-6.23568		17.8	-6.74735		16.4	-3.78823		16.4	-8.01293
16.5	-8.18378		16.5	-5.8696		17.9	-5.90879		16.5	0.809664		16.5	-6.40406
16.6	-7.57967		16.6	-7.12897		18	-6.3479		16.6	-2.63495		16.6	-6.57909
16.7	-7.75867		16.7	-7.70419		18.1	-4.78508		16.7	-2.79186		16.7	-7.71834
16.8	-7.59244		16.8	-6.83818		18.2	-3.61283		16.8	2.70441		16.8	-8.25125
16.9	-7.75839		16.9	-5.52786		18.3	-5.44356		16.9	-2.81112		16.9	-7.35787
17	-6.71861		17	-7.77588		18.4	-7.19264		17	-2.7917		17	-8.57535
17.1	-7.13055		17.1	-6.58252		18.5	-5.37231		17.1	-2.70335		17.1	-9.73785
17.2	-6.72996		17.2	-6.9174		18.6	-4.67874		17.2	0.0785855		17.2	-8.58609
17.3	-9.07339		17.3	-6.40575		18.7	-4.371		17.3	-3.34568		17.3	-7.84774
17.4	-8.99312		17.4	-7.62756		18.8	-5.06272		17.4	-1.44919		17.4	-8.06622
17.5	-8.47661		17.5	-7.72904		18.9	-5.45447		17.5	3.19081		17.5	-9.5334
17.6	-7.38931		17.6	-8.02552		19	-5.07945		17.6	-2.9593		17.6	-8.01752
17.7	-8.64891		17.7	-7.66061		19.1	-4.66113		17.7	-2.1005		17.7	-7.48489
17.8	-7.9568		17.8	-8.00184		19.2	-4.11727		17.8	-0.616802		17.8	-7.73396
17.9	-8.08102		17.9	-6.6036		19.3	-5.05878		17.9	1.21303		17.9	-7.43652
18	-7.40402		18	-6.56094		19.4	-5.90299		18	-2.80784		18	-5.06649
18.1	-6.85912		18.1	-5.87788		19.5	-5.90822		18.1	-1.20506		18.1	-5.71855
18.2	-6.74183		18.2	-6.6343		19.6	-4.46677		18.2	1.57451		18.2	-6.27653
18.3	-7.43291		18.3	-6.06343		19.7	-4.44472		18.3	-1.09056		18.3	-7.01502
18.4	-8.74349		18.4	-5.9858		19.8	-4.53082		18.4	-2.5068		18.4	-5.89946
18.5	-7.13384		18.5	-6.4316		19.9	-3.76179		18.5	3.23229		18.5	-5.93869
18.6	-8.05428		18.6	-5.28726		20	-3.82013		18.6	-1.84953		18.6	-6.15995
18.7	-7.92104		18.7	-6.49594		20.1	-2.23592		18.7	-0.967312		18.7	-3.9732
18.8	-7.29899		18.8	-4.44526		20.2	-1.46824		18.8	-0.975576		18.8	-3.27503
18.9	-7.00593		18.9	-5.74394		20.3	-2.30537		18.9	2.11455		18.9	-3.95154
19	-8.68984		19	-6.10911		20.4	-2.95055		19	-2.31876		19	-4.38393
19.1	-7.71995		19.1	-4.94937		20.5	-2.06379		19.1	-0.406215		19.1	-3.06495
19.2	-7.39079		19.2	-3.17936		20.6	-2.31224		19.2	3.90285		19.2	-3.10288
19.3	-8.43352		19.3	-3.00167		20.7	-1.08689		19.3	-2.52078		19.3	-3.62588
19.4	-8.60576		19.4	-3.3276		20.8	0.105068		19.4	-1.0538		19.4	-3.28909
19.5	-7.6248		19.5	-2.17949		20.9	1.43638		19.5	-0.76102		19.5	-2.00746
19.6	-8.83291		19.6	-2.95257		21	-0.107765		19.6	4.01322		19.6	-2.96041
19.7	-7.48412		19.7	-2.46527		21.1	-1.56838		19.7	-1.5598		19.7	-4.07357
19.8	-7.80182		19.8	-2.57812		21.2	-1.16992		19.8	-1.29779		19.8	-3.476
19.9	-7.71638		19.9	-2.65651		21.3	-0.0579714		19.9	3.4728		19.9	-2.69994
20	-6.09565		20	-1.69111		21.4	-1.4056		20	-1.61575		20	-2.28774
20.1	-6.79406		20.1	-2.76451		21.5	-0.840852		20.1	-1.19822		20.1	-3.51383
20.2	-8.52912		20.2	-3.12958		21.6	-0.161346		20.2	0.350077		20.2	-1.61106
20.3	-7.46221		20.3	-0.734992		21.7	-2.20216		20.3	4.07903		20.3	-1.06562
20.4	-7.73148		20.4	-0.980441		21.8	-1.51664		20.4	-1.14737		20.4	-1.84746
20.5	-7.2253		20.5	-2.00181		21.9	-0.0366121		20.5	-0.453055		20.5	-1.61333
20.6	-8.60423		20.6	-0.790122		22	-0.792663		20.6	4.10453		20.6	-0.501216
20.7	-8.55001		20.7	-1.73427		22.1	-1.24098		20.7	-1.75298		20.7	-0.632774
20.8	-6.71872		20.8	-0.905234		22.2	-0.861437		20.8	-0.352854		20.8	-0.994146
20.9	-8.88593		20.9	-0.489208		22.3	-1.70894		20.9	-0.840436		20.9	-1.16013
21	-6.35856		21	-0.780334		22.4	-0.360921		21	3.96385		21	0.261186
21.1	-7.61197		21.1	-0.301984		22.5	1.24484		21.1	-0.0979416		21.1	0.225052
21.2	-8.07086		21.2	-1.39831		22.6	1.6355		21.2	1.07422		21.2	-1.42748
21.3	-8.18366		21.3	-1.11973		22.7	0.057377		21.3	4.27358		21.3	0.131267
21.4	-7.7216		21.4	-2.51948		22.8	0.665735		21.4	-0.854563		21.4	-0.240044
21.5	-6.49266		21.5	-0.37853		22.9	1.55697		21.5	-1.51343		21.5	-1.32679
21.6	-7.21326		21.6	-1.40943		23	1.43194		21.6	0.00482089		21.6	-1.32158
21.7	-8.05212		21.7	-0.601727		23.1	-1.1489		21.7	3.58055		21.7	0.652804
21.8	-5.77603		21.8	0.562191		23.2	-0.982513		21.8	-0.655511		21.8	0.33257
21.9	-8.5432		21.9	0.145663		23.3	0.235696		21.9	-1.05494		21.9	-0.172686
22	-7.98088		22	0.0761444		23.4	-0.711035		22	4.63409		22	-0.826582
22.1	-8.55495		22.1	-0.175412		23.5	0.433188		22.1	-1.40403		22.1	0.44616
22.2	-7.23467		22.2	-0.128313		23.6	2.62265		22.2	-0.175678		22.2	-0.131761
22.3	-7.84655		22.3	-0.944803		23.7	0.64075		22.3			22.3	-1.12444
22.4	-7.08189		22.4	-1.0769		23.8	-0.477805		22.4	0.477914		22.4	0.217488
22.5	-8.35699		22.5	-0.520914		23.9	-0.585588		22.5			22.5	0.127449
22.6	-5.92704		22.6	-1.49083		24	0.195974		22.6	2.9969		22.6	-0.391757
22.7	-8.1295		22.7	-1.31256		24.1	0.792936		22.7			22.7	-1.8757
22.8	-8.08522		22.8	-0.504099		24.2	1.49917		22.8	-1.58977		22.8	-0.339202
22.9	-8.00302		22.9	-1.73285		24.3	1.55679		22.9			22.9	-1.0079
23	-6.90897		23	1.22743		24.4	0.813971		23			23	-1.32048
23.1	-7.57791		23.1	-1.46364		24.5	1.48981		23.1	-0.54788		23.1	-0.834104
23.2	-6.90147		23.2	-0.732231		24.6	2.05603		23.2			23.2	1.10333
23.3	-7.69418		23.3	-1.15579		24.7	2.09497		23.3	4.83832		23.3	0.205236
23.4	-7.85019		23.4	-0.371838		24.8	-0.11814		23.4			23.4	0.312624
23.5	-6.89313		23.5	-0.730977		24.9	0.814848		23.5	-2.31989		23.5	0.472635
23.6	-8.5021		23.6	0.173939		25	1.90963		23.6			23.6	1.52624
23.7	-6.76766		23.7	-0.260742		25.1	0.196891		23.7	-0.305262		23.7	0.472664
23.8	-6.79815		23.8	-2.45431		25.2	0.411473		23.8			23.8	-1.30098
23.9	-7.85002		23.9	-2.68947		25.3	1.94094		23.9	-0.294852		23.9	0.273469
24	-7.5439		24	-1.77342		25.4	0.834968		24	3.50417		24	0.545517
24.1	-6.9717		24.1	-0.789202		25.5	-0.202898		24.1	-1.03242		24.1	-0.597607
24.2	-7.30779		24.2	-1.19536		25.6	0.239375		24.2	-0.280356		24.2	-0.251681
24.3	-6.82591		24.3	-0.0233235		25.7	-0.942657		24.3	6.39109		24.3	1.48973
24.4	-6.39564		24.4	-1.27776		25.8	-0.64714		24.4	-0.289692		24.4	0.894816
24.5	-7.98502		24.5	0.693364		25.9	0.387476		24.5	-0.606464		24.5	0.176671
24.6	-7.42746		24.6	-0.555548		26	0.922903		24.6	-0.0948442		24.6	-0.80544
24.7	-7.76633		24.7	-0.44579		26.1	0.356472		24.7	4.07851		24.7	0.379475
24.8	-8.48155		24.8	-1.28336		26.2	0.796596		24.8	-0.770225		24.8	-0.59503
24.9	-8.62427		24.9	-0.660788		26.3	1.57488		24.9	1.14563		24.9	-1.36323
25	-7.99513		25	-0.776737		26.4	1.08843		25	4.5342		25	0.151377
25.1	-5.67191		25.1	-1.56846		26.5	-0.547227		25.1	-0.721078		25.1	-0.00707776
25.2	-8.56069		25.2	1.16787		26.6	-0.207009		25.2	0.789035		25.2	0.0756852
25.3	-8.31112		25.3	0.0714597		26.7	0.334492		25.3	0.87662		25.3	-0.704752
25.4	-7.67845		25.4	-0.646065		26.8	-0.525971		25.4	-2.18436		25.4	0.399242
25.5	-7.82771		25.5	-0.556636		26.9	-0.491162		25.5	-11.9614		25.5	-0.078881
25.6	-7.16081		25.6	-0.053189		27	0.708716		25.6	-11.1698		25.6	-0.872045
25.7	-8.68127		25.7	-0.896031		27.1	-0.590732		25.7	-9.55182		25.7	-0.440181
25.8	-7.67187		25.8	0.578587		27.2	0.583847		25.8	-14.3824		25.8	1.54001
25.9	-7.3942		25.9	0.0617555		27.3	1.035		25.9	-13.5786		25.9	0.536934
26	-7.20872		26	0.729337		27.4	-0.418207		26	-12.6932		26	0.000160866
26.1	-7.72415		26.1	0.215433		27.5	0.518455		26.1	-10.2411		26.1	0.486323
26.2	-7.05266		26.2	0.721975		27.6	2.00693		26.2	-14.4842		26.2	0.320655
26.3	-6.17281		26.3	1.32004		27.7	0.703668		26.3	-13.973		26.3	-0.750326
26.4	-7.85484		26.4	0.331716		27.8	0.3995		26.4	-11.8061		26.4	-2.50861
26.5	-6.54739		26.5	1.04589		27.9	-1.75893		26.5	-15.2799		26.5	-0.688484
26.6	-5.22409		26.6	0.876824		28	-5.75469		26.6	-13.9502		26.6	-0.341137
26.7	-7.31477		26.7	-0.728216		28.1	-11.9378		26.7	-13.2539		26.7	-1.3805
26.8	-6.37775		26.8	0.104839		28.2	-12.9193		26.8			26.8	-1.21428
26.9	-6.93775		26.9	-0.731311		28.3	-14.337		26.9	-11.8754		26.9	0.86722
27	-7.4869		27	0.944586		28.4	-13.9133		27			27	0.00542556
27.1	-7.08757		27.1	1.14804		28.5	-17.1542		27.1	-14.6757		27.1	-0.379004
27.2	-5.72658		27.2	-0.142953		28.6	-16.7997		27.2			27.2	-0.703547
27.3	-6.79911		27.3	1.73916		28.7	-16.4146		27.3	-14.1054		27.3	0.267876
27.4	-5.30329		27.4	-0.0915038		28.8	-15.9193		27.4			27.4	-1.38119
27.5	-7.1545		27.5	0.782041		28.9	-17.4009		27.5	-10.2476		27.5	-4.29842
27.6	-6.49782		27.6	1.88004		29	-17.0062		27.6			27.6	-4.13307
27.7	-5.65715		27.7	1.21789		29.1	-16.9271		27.7	-14.5368		27.7	-5.86283
27.8	-6.72264		27.8	1.2598		29.2	-15.4694		27.8			27.8	-7.85634
27.9	-5.74497		27.9	1.09885		29.3	-16.3768		27.9	-13.8561		27.9	-8.36945
28	-5.28762		28	1.91693		29.4	-17.6076		28			28	-7.42554
28.1	-4.4717		28.1	0.513335		29.5	-16.9325		28.1	-12.5786		28.1	-7.49548
28.2	-5.94964		28.2	0.420894		29.6	-16.6505		28.2			28.2	-7.83581
28.3	-6.07857		28.3	0.848046		29.7	-16.5417		28.3	-10.8508		28.3	-8.31256
28.4	-5.6379		28.4	1.96829		29.8	-17.9155		28.4			28.4	-7.27836
28.5	-5.21677		28.5	0.384754		29.9	-18.3838		28.5	-13.3804		28.5	-8.5406
28.6	-6.04439		28.6	2.38683		30	-17.2434		28.6	-12.9002		28.6	-9.88012
28.7	-5.35665		28.7	1.15214		30.1	-15.4869		28.7	-10.3739		28.7	-9.35901
28.8	-5.80532		28.8	0.325274		30.2	-16.8707		28.8	-14.9712		28.8	-9.40273
28.9	-5.01852		28.9	-0.283162		30.3	-17.3459		28.9	-14.4216		28.9	-9.81602
29	-4.93393		29	1.30548		30.4	-15.8735		29	-10.5064		29	-10.1863
29.1	-4.60494		29.1	0.0928758		30.5	-17.08		29.1	-13.9468		29.1	-8.94098
29.2	-4.41736		29.2	2.02552		30.6	-17.074		29.2	-14.1648		29.2	-8.8003
29.3	-4.42264		29.3	-0.174324		30.7	-16.4664		29.3	-14.2469		29.3	-9.61646
29.4	-3.94922		29.4	0.830729		30.8	-17.1587		29.4	-11.1341		29.4	-9.51239
29.5	-3.85044		29.5	1.60916		30.9	-17.4481		29.5	-15.1914		29.5	-8.58919
29.6	-4.56508		29.6	2.76839		31	-16.5647		29.6	-14.4626		29.6	-9.56582
29.7	-3.61138		29.7	1.4866		31.1	-17.3033		29.7	-10.2657		29.7	-10.3705
29.8	-3.8082		29.8	-0.0326094		31.2	-17.3546		29.8	-15.2154		29.8	-10.2636
29.9	-4.28441		29.9	2.66332		31.3	-16.7911		29.9	-13.7307		29.9	-10.4146
30	-3.47762		30	-0.694419		31.4	-15.7744		30	-13.4627		30	-10.9827
30.1	-3.19274		30.1	1.97699		31.5	-17.0275		30.1	-11.3108		30.1	-12.415
30.2	-2.56763		30.2	1.93266		31.6	-17.4553		30.2	-14.6675		30.2	-10.7023
30.3	-3.27347		30.3	1.1754		31.7	-17.7063		30.3	-15.4077		30.3	-10.4995
30.4	-4.85167		30.4	-0.0381308		31.8	-16.9707		30.4	-11.2481		30.4	-11.1879
30.5	-2.42433		30.5	1.97189		31.9	-19.065		30.5	-14.8023		30.5	-10.4988
30.6	-1.87978		30.6	1.44736		32	-18.7915		30.6	-14.7114		30.6	-9.07484
30.7	-3.3219		30.7	2.1561		32.1	-17.658		30.7	-14.121		30.7	-9.60779
30.8	-3.88621		30.8	1.24575		32.2	-17.0203		30.8	-10.428		30.8	-9.94402
30.9	-2.49927		30.9	1.88087		32.3	-17.1135		30.9	-15.1951		30.9	-10.7257
31	-2.81135		31	0.545292		32.4	-17.0886		31			31	-10.0536
31.1	-1.88563		31.1	0.846373		32.5	-18.0984		31.1	-13.2376		31.1	-10.6748
31.2	-2.15915		31.2	1.90513		32.6	-18.1262		31.2			31.2	-11.9648
31.3	-2.47111		31.3	0.586786		32.7	-17.0958		31.3	-9.83077		31.3	-10.8504
31.4	-3.21602		31.4	0.886361		32.8	-18.7361		31.4			31.4	-10.591
31.5	-2.07865		31.5	1.51111		32.9	-16.9115		31.5	-15.5653		31.5	-10.5199
31.6	-2.75406		31.6	0.441306		33	-16.2681		31.6			31.6	-10.1091
31.7	-2.76173		31.7	1.70879		33.1	-15.5656		31.7	-14.077		31.7	-9.22357
31.8	-0.559889		31.8	0.789904		33.2	-17.7565		31.8			31.8	-8.75787
31.9	-1.62237		31.9	1.74778		33.3	-17.2021		31.9	-13.397		31.9	-9.48421
32	-2.02892		32	1.66387		33.4	-16.7924		32			32	-10.2155
32.1	-1.20442		32.1	1.09692		33.5	-16.3056		32.1	-11.2072		32.1	-9.71382
32.2	-0.512996		32.2	1.67834		33.6	-17.3103		32.2			32.2	-10.6447
32.3	-2.94783		32.3	-0.494562		33.7	-16.9744		32.3	-13.3543		32.3	-11.0477
32.4	-1.19375		32.4	0.797183		33.8	-16.659		32.4			32.4	-9.9747
32.5	-1.46756		32.5	0.71796		33.9	-17.5652		32.5	-13.7034		32.5	-9.55948
32.6	-1.54937		32.6	-1.20966		34	-17.9579		32.6			32.6	-9.23904
32.7	-2.46294		32.7	-0.787696		34.1	-17.3103		32.7	-10.9334		32.7	-10.673
32.8	-1.33698		32.8	-1.96366		34.2	-18.4325		32.8			32.8	-9.34719
32.9	-0.789077		32.9	-0.785103		34.3	-17.5432		32.9	-15.1092		32.9	-8.96844
33	-1.88398		33	-2.88045		34.4	-15.6237		33			33	-9.62424
33.1	-0.672525		33.1	-1.74749		34.5	-15.022		33.1	-14.7142		33.1	-9.6608
33.2	-0.762678		33.2	-1.59457		34.6	-12.3933		33.2			33.2	-8.32396
33.3	-0.898022		33.3	-3.33756		34.7	-10.2672		33.3	-12.2544		33.3	-9.57594
33.4	-0.924024		33.4	-5.10757		34.8	-7.42177		33.4			33.4	-10.7217
33.5	-0.185593		33.5	-2.7881		34.9	-7.95545		33.5	-10.9467		33.5	-11.1236
33.6	-0.31543		33.6	-5.35444		35	-6.49996		33.6			33.6	-10.2798
33.7	-0.946789		33.7	-3.13243		35.1	-5.75		33.7	-15.1609		33.7	-10.6113
33.8	-1.33948		33.8	-5.6034		35.2	-4.92208		33.8			33.8	-11.7596
33.9	-0.498349		33.9	-4.12711		35.3	-5.42822		33.9	-15.158		33.9	-10.3044
34	-0.721008		34	-4.06161		35.4	-3.27158		34			34	-9.81196
34.1	-0.485007		34.1	-4.27552		35.5	-2.77615		34.1	-9.36091		34.1	-10.6382
34.2	0.224243		34.2	-6.61314		35.6	-3.14459		34.2			34.2	-9.97422
34.3	-0.793733		34.3	-6.51359		35.7	-3.03036		34.3	-14.7912		34.3	-8.58307
34.4	0.0884448		34.4	-6.15286		35.8	-0.94491		34.4			34.4	-9.36593
34.5	-1.14702		34.5	-7.43557		35.9	-3.81034		34.5	-14.148		34.5	-10.0562
34.6	-1.51519		34.6	-5.89929		36	-2.9401		34.6			34.6	-10.3983
34.7	-0.761713		34.7	-6.94233		36.1	-2.12796		34.7	-14.6895		34.7	-8.84585
34.8	-0.450831		34.8	-6.80538		36.2	-2.70484		34.8			34.8	-9.57177
34.9	-1.48618		34.9	-7.11926		36.3	-3.06298		34.9	-10.3306		34.9	-10.436
35	0.314113		35	-6.55659		36.4	-2.03037		35			35	-8.97148
35.1	-0.245203		35.1	-7.08229		36.5	-1.39228		35.1	-14.6858		35.1	-9.43085
35.2	-0.449355		35.2	-7.92864		36.6	-1.98414		35.2			35.2	-10.0955
35.3	-0.953318		35.3	-6.65965		36.7	-2.40396		35.3	-15.0158		35.3	-10.1629
35.4	0.092135		35.4	-6.78221		36.8	-1.22535		35.4			35.4	-9.446
35.5	-1.32449		35.5	-6.39714		36.9	-0.599629		35.5	-9.6362		35.5	-9.17401
35.6	0.292426		35.6	-8.16481		37	-0.867159		35.6	-14.1525		35.6	-10.3372
35.7	-0.782776		35.7	-7.05075		37.1	-0.472399		35.7	-12.5745		35.7	-10.3569
35.8	-0.0990725		35.8	-7.01402		37.2	-0.150161		35.8	-11.7122		35.8	-9.1005
35.9	-0.365446		35.9	-7.75388		37.3	-2.30192		35.9	-9.24982		35.9	-9.76307
36	-0.723676		36	-7.86306		37.4	-2.48277		36	-11.3602		36	-10.4622
36.1	0.228842		36.1	-9.46048		37.5	-0.407055		36.1	-10.9655		36.1	-9.67379
36.2	0.788896		36.2	-9.0079		37.6	-1.53674		36.2	-4.78607		36.2	-10.2918
36.3	0.0949736		36.3	-7.96888		37.7	-2.04552		36.3	-10.0501		36.3	-10.4186
36.4	-0.622509		36.4	-9.68175		37.8	-0.457248		36.4	-9.78174		36.4	-11.9371
36.5	-0.915451		36.5	-8.50989		37.9	-0.288041		36.5	-9.60555		36.5	-10.2654
36.6	-0.224141		36.6	-9.58605		38	-0.156928		36.6	-4.23554		36.6	-9.78219
36.7	0.0322975		36.7	-7.2532		38.1	0.212415		36.7	-10.1208		36.7	-9.67112
36.8	-1.44292		36.8	-8.93587		38.2	0.169637		36.8	-9.27661		36.8	-9.04287
36.9	-0.985792		36.9	-8.37972		38.3	0.815504		36.9	-3.41356		36.9	-7.40422
37	-0.64465		37	-10.4629		38.4	0.326146		37	-8.29265		37	-7.99976
37.1	-0.151246		37.1	-9.44676		38.5	0.204771		37.1	-8.51584		37.1	-7.52214
37.2	-0.106055		37.2	-9.51536		38.6	-0.889479		37.2	-7.38918		37.2	-6.85565
37.3	-0.955873		37.3	-9.45429		38.7	-0.990329		37.3	-3.67094		37.3	-5.36473
37.4	-0.912726		37.4	-9.76575		38.8	-1.55114		37.4	-8.35902		37.4	-4.8815
37.5	0.0957684		37.5	-8.65621		38.9	-0.562612		37.5	-5.62962		37.5	-5.30272
37.6	-1.09877		37.6	-9.62604		39	-1.35313		37.6	-1.79478		37.6	-3.5487
37.7	0.0152659		37.7	-8.42623		39.1	-0.901128		37.7	-5.97056		37.7	-3.46867
37.8	-0.379128		37.8	-8.48839		39.2	-0.382183		37.8	-5.80867		37.8	-4.29426
37.9	-0.384464		37.9	-10.0588		39.3	-1.54945		37.9	-4.31233		37.9	-3.89782
38	-0.116104		38	-10.1616		39.4	-2.28929		38	-1.44951		38	-1.93906
38.1	-0.238163		38.1	-11.1693		39.5	-2.19208		38.1	-6.52991		38.1	-2.27883
38.2	1.32204		38.2	-10.1989		39.6	-1.90667		38.2	-6.14311		38.2	-3.01055
38.3	0.115582		38.3	-9.63106		39.7	-0.244435		38.3	-1.14418		38.3	-3.39627
38.4	-0.67701		38.4	-9.51218		39.8	1.40051		38.4	-5.81264		38.4	-2.56696
38.5	-0.442429		38.5	-9.94193		39.9	-0.387051		38.5	-5.13002		38.5	-2.74533
38.6	-0.3332		38.6	-9.58162		40	-1.1244		38.6	-2.96988		38.6	-4.13605
38.7	-1.46886		38.7	-9.8264		40.1	-0.926998		38.7	-0.630719		38.7	-2.88921
38.8	-0.028051		38.8	-10.4676		40.2	0.996219		38.8	-4.26608		38.8	-2.50592
38.9	-0.705679		38.9	-9.40201		40.3	0.0641418		38.9	-3.2531		38.9	-3.28138
39	0.060286		39	-10.0416		40.4	0.101192		39	0.566645		39	-3.65553
39.1	-0.791462		39.1	-9.79034		40.5	1.05475		39.1	-3.96181		39.1	-2.12889
39.2	-0.12269		39.2	-9.92628		40.6	1.9804		39.2	-2.42167		39.2	-2.32286
39.3	1.20026		39.3	-9.91901		40.7	0.771048		39.3	-2.63141		39.3	-2.21568
39.4	0.676714		39.4	-11.4299		40.8	0.526399		39.4	1.61634		39.4	-2.77188
39.5	0.502255		39.5	-10.475		40.9	1.11464		39.5	-4.89309		39.5	-1.40633
39.6	-0.581009		39.6	-11.0736		41	-0.765785		39.6	-2.60738		39.6	-1.54909
39.7	0.698004		39.7	-9.84422		41.1	-0.351297		39.7	0.867927		39.7	-2.01915
39.8	0.698742		39.8	-10.2006		41.2	1.0074		39.8	-2.91431		39.8	-1.14081
39.9	0.259669		39.9	-9.18441		41.3	-0.564658		39.9	-1.71546		39.9	-1.12936
40	0.711572		40	-9.43137		41.4	-1.55006		40	-1.08667		40	-2.14402
40.1	0.404096		40.1	-9.07198		41.5	-1.09898		40.1	0.330818		40.1	-2.64855
40.2	0.179734		40.2	-10.6313		41.6	-1.25385		40.2	-3.97071		40.2	-2.18795
40.3	0.522749		40.3	-10.3861		41.7	0.526013		40.3	-0.921117		40.3	-2.09077
40.4	1.50649		40.4	-10.4005		41.8	0.436626		40.4	2.05376		40.4	-2.20194
40.5	-1.356		40.5	-10.4358		41.9	2.10464		40.5	-2.74471		40.5	-2.10045
40.6	-0.95945		40.6	-9.6979		42	0.790925		40.6	-2.56366		40.6	-1.52088
40.7	0.119726		40.7	-11.4203		42.1	2.0671		40.7	0.609868		40.7	-1.98061
40.8	0.271875		40.8	-9.94084		42.2	0.45417		40.8	-1.12476		40.8	-2.59455
40.9	2.75666		40.9	-10.6866		42.3	0.902296		40.9	-0.900889		40.9	-1.83652
41	2.50613		41	-10.4645		42.4	-1.35526		41	-0.826146		41	-1.25451
41.1	3.96545		41.1	-10.9163		42.5	-0.835033		41.1	2.56355		41.1	-1.3205
41.2	3.73638		41.2	-11.5577		42.6	1.07676		41.2	-1.75437		41.2	-2.40022
41.3	5.99885		41.3	-9.97715		42.7	-0.312229		41.3	-1.47478		41.3	-0.897395
41.4	4.59465		41.4	-11.7272		43	-2.62291		41.4	1.61222		41.4	-0.728979
41.5	6.08048		41.5	-11.2026		43.1	-0.222104		41.5	-1.7985		41.5	-1.55735
41.6	7.30846		41.6	-11.9501		43.2	1.24484		41.6	-2.08638		41.6	-1.45635
41.7	5.62994		41.7	-10.8736		43.3	1.6355		41.7	-0.929671		41.7	-0.10242
41.8	7.08841		41.8	-10.0291		43.4	0.057377		41.8	3.32917		41.8	-0.364454
41.9	7.13184		41.9	-10.589		43.5	0.665735		41.9	-1.12347		41.9	-0.958095
42	6.92655		42	-11.2696		43.6	1.55697		42	-1.62707		42	-1.51981
42.1	9.06844		42.1	-11.2355		43.7	1.43194		42.1	3.78181		42.1	-0.284109
42.2	7.74259		42.2	-10.5985		43.8	-1.1489		42.2	-2.51404		42.2	-0.403692
42.3	7.4442		42.3	-10.6348		43.9	-0.982513		42.3	-0.455195		42.3	-2.68162
42.4	7.73998		42.4	-11.4835		44	0.235696		42.4	-0.0943132		42.4	-1.53829
42.5	7.13553		42.5	-9.98861		44.1	-0.711035		42.5	3.00223		42.5	-1.79895
42.6	6.79797		42.6	-10.0271		44.2	0.433188		42.6	-1.24183		42.6	-2.68283
42.7	7.35348		42.7	-10.3784		44.3	2.62265		42.7	0.484363		42.7	-1.99842
42.8	8.40938		42.8	-9.79544		44.4	0.64075		42.8	3.51971		42.8	-0.533369
42.9	7.14422		42.9	-13.2971		44.5	-0.477805		42.9	-0.961475		42.9	0.341035
43	6.97203		43	-11.3692		44.6	-0.585588		43	-0.439505		43	0.260836
43.1	7.77603		43.1	-10.7296		44.7	0.195974		43.1	1.12995		43.1	-0.556697
43.2	7.44886		43.2	-12.0266		44.8	0.792936		43.2	2.41698		43.2	0.612001
43.3	8.42686		43.3	-10.078		44.9	1.49917		43.3	-1.19249		43.3	-0.703307
43.4	7.02891		43.4	-11.7246		45	1.55679		43.4	-0.864789		43.4	-1.63459
43.5	7.92932		43.5	-10.137		45.1	0.813971		43.5	3.5738		43.5	-0.924607
43.6	8.45474		43.6	-12.3291		45.2	1.48981		43.6	-1.29139		43.6	-1.08601
43.7	7.95299		43.7	-11.7967		45.3	2.05603		43.7	-0.706538		43.7	-1.24346
43.8	8.19069		43.8	-11.3208		45.4	2.09497		43.8	0.46517		43.8	-3.0775
43.9	8.81496		43.9	-11.0178		45.5	-0.11814		43.9	4.92639		43.9	-1.8619
44	8.82637		44	-11.5384		45.6	0.814848		44	-0.203182		44	-1.22138
44.1	7.04407		44.1	-11.2819		45.7	1.90963		44.1	-1.29619		44.1	-1.12743
44.2	8.70334		44.2	-11.7692		45.8	0.196891		44.2	5.20406		44.2	-0.0746322
44.3	7.63257		44.3	-10.2878		45.9	0.411473		44.3	-0.29596		44.3	0.797281
44.4	7.71381		44.4	-11.9939		46	1.94094		44.4	-0.721401		44.4	0.529673
44.5	9.19039		44.5	-11.9981		46.1	0.834968		44.5	0.595884		44.5	-0.27895
44.6	8.40024		44.6	-11.9074		46.2	-0.202898		44.6	4.51441		44.6	-1.26475
44.7	9.8117		44.7	-11.1225		46.3	0.239375		44.7	-0.388858		44.7	-1.08893
44.8	9.47442		44.8	-12.4489		46.4	-0.942657		44.8	-0.264972		44.8	-1.28793
44.9	7.39271		44.9	-10.3793		46.5	-0.64714		44.9	5.33153		44.9	-2.10105
45	7.86999		45	-10.9101		46.6	0.387476		45	-0.812001		45	-0.141871
45.1	10.1237		45.1	-10.9379		46.7	0.922903		45.1	-0.914046		45.1	0.00759643
45.2	8.79401		45.2	-11.7278		46.8	0.356472		45.2	0.326026		45.2	-0.480161
45.3	8.46127		45.3	-12.7987		46.9	1.06243		45.3	4.55418		45.3	-0.671635
45.4	9.19964		45.4	-12.0473		47	0.286201		45.4	-1.11432		45.4	-0.0201524
45.5	8.87644		45.5	-11.5957					45.5	0.396528		45.5	-1.20011
45.6	9.15763		45.6	-12.3233					45.6	4.81148		45.6	-1.55561
45.7	8.52059		45.7	-12.2847					45.7	-0.0280713		45.7	-1.55089
45.8	8.695		45.8	-11.4973					45.8	-0.811656		45.8	-0.106114
45.9	9.21083		45.9	-10.4266					45.9	0.590221		45.9	-0.429224
46	8.85844		46	-11.4828					46	4.78653		46	-1.28133
46.1	8.81967		46.1	-9.9999					46.1	-0.0175719		46.1	-0.200529
46.2	8.04842		46.2	-9.20683					46.2	-0.839695		46.2	-0.597059
46.3	8.68466		46.3	-9.22298					46.3	6.04347		46.3	-1.63355
46.4	7.9577		46.4	-7.78107					46.4	-0.94153		46.4	-2.03271
46.5	9.43133		46.5	-8.01882					46.5	0.252132		46.5	0.368569
46.6	9.47822		46.6	-6.41278					46.6	-0.146877		46.6	0.744313
46.7	7.55019		46.7	-6.67555					46.7	3.80048		46.7	0.0954486
46.8	8.65111		46.8	-3.57648					46.8	-0.547532		46.8	0.00405284
46.9	8.83636		46.9	-5.65175					46.9	1.02244		46.9	0.88812
47	8.16253		47	-3.02761					47	5.12472		47	-0.45695
47.1	8.63681		47.1	-3.11168					47.1	-0.45555		47.1	-1.86048
47.2	8.72185		47.2	-0.85094					47.2	0.561005		47.2	-1.30201
47.3	9.64047		47.3	-1.64702					47.3	0.634643		47.3	-0.33163
47.4	9.613		47.4	-1.21317					47.4	2.84443		47.4	-0.223932
47.5	8.25507		47.5	-0.810618					47.5	-0.034096		47.5	-1.85189
47.6	8.68631		47.6	-0.159851					47.6			47.6	-0.0140714
47.7	7.96468		47.7	-0.460347					47.7	3.80048		47.7	0.2862
47.8	8.01618		47.8	0.0205963					47.8	-0.547532		47.8	0.00327093
47.9	9.12169		47.9	0.543284					47.9	1.02244		47.9	-0.287105
48	8.7734		48	0.794338					48	5.12472		48	1.13711
48.1	10.2736		48.1	0.541695					48.1	-0.45555		48.1	0.0762584
48.2	9.44404		48.2	0.70265					48.2	0.561005		48.2	-0.469312
48.3	7.191		48.3	0.603433					48.3	0.634643		48.3	-0.775358
48.4	9.23654		48.4	-0.155083					48.4	2.84443		48.4	0.181539
48.5	9.02064		48.5	0.999632					48.5	-0.034096		48.5	-0.30347
48.6	9.68521		48.6	-0.0620566								48.6	-1.68744
48.7	10.1149		48.7	1.87376								48.7	-0.499882
48.8	9.73477		48.8	1.0822								48.8	-0.0925744
48.9	9.91383		48.9	1.41733								48.9	-1.046
49	9.36683		49	0.589965								49	-0.604934
49.1	9.17177		49.1	1.4748								49.1	1.12246
49.2	7.91421		49.2	0.975037								49.2	0.794054
49.3	9.94608		49.3	1.05828								49.3	0.202313
49.4	10.5601		49.4	0.428674								49.4	-0.471833
49.5	9.3305		49.5	1.0177								49.5	0.933357
49.6	9.04295		49.6	1.8285								49.6	0.0927928
49.7	10.2285		49.7	1.47539								49.7	-1.65157
49.8	9.41884		49.8	0.572146								49.8	-0.119567
49.9	8.51049		49.9	-0.443532								49.9	-0.487555
50	8.5567		50	2.17936								50	-1.38355
50.1	9.60403		50.1	1.59385								50.1	-1.32672
50.2	8.06551		50.2	1.25052								50.2	0.295267
50.3	9.02422		50.3	1.42126								50.3	1.0657
50.4	7.97666		50.4	1.55562								50.4	0.717563
50.5	10.0195		50.5	0.768907								50.5	-0.382147
50.6	9.3766		50.6	1.26014								50.6	0.185183
50.7	10.1251		50.7	1.2015
50.8	10.4478		50.8	0.256676
50.9	9.81102		50.9	3.00422
51	10.0627		51	1.22191
51.1	9.18823		51.1	1.41097
51.2	9.15456		51.2	2.13561
51.3	9.12135		51.3	1.7548
51.4	10.6324		51.4	-0.0238255
51.5	9.33975		51.5	0.793669
51.6	9.10858		51.6	1.77555
51.7	9.9295		51.7	1.07802
51.8	10.0647		51.8	0.951613
51.9	9.49837		51.9	0.93714
52	8.58446		52	1.63124
52.1	10.236		52.1	1.27051
52.2	10.0425		52.2	1.58699
52.3	9.0392		52.3	0.526887
52.4	10.1619		52.4	2.01656
52.5	9.2257		52.5	0.550311
52.6	9.05959		52.6	1.52709
52.7	9.62816		52.7	1.0648
52.8	9.68039		52.8	2.52871
52.9	10.0157		52.9	1.23872
53	8.92526		53	1.26625
53.1	10.2839		53.1	2.29732
53.2	10.061		53.2	1.72126
53.3	9.60374		53.3	2.47166
53.4	9.3917		53.4	3.0381
53.5	9.49559		53.5	1.65241
53.6	9.69923		53.6	1.29921
53.7	8.56073		53.7	0.561856
53.8	9.5074		53.8	1.5347
53.9	9.04948		53.9	2.15677
54	11.0191		54	1.97189
54.1	8.34926		54.1	1.09667
54.2	9.58949		54.2	0.603015
54.3	7.90076		54.3	1.66788
54.4	7.2162		54.4	1.96235
54.5	7.43852		54.5	1.22977
54.6	8.9893		54.6	2.04225
54.7	7.96616		54.7	2.09035
54.8	7.43154		54.8	3.02597
54.9	7.77762		54.9	2.58024
55	7.43131		55	1.93475
55.1	8.73843		55.1	1.4431
55.2	7.39963		55.2	3.10845
55.3	8.12018		55.3	2.65353
55.4	6.58666		55.4	0.212003
55.5	6.78627		55.5	3.53167
55.6	7.5037		55.6	2.05714
55.7	7.5754		55.7	1.65425
55.8	5.22158		55.8	1.38646
55.9	5.72935		55.9	1.01829
56	6.30479		56	2.21483
56.1	5.04355		56.1	2.78177
56.2	5.20716		56.2	1.67909
56.3	4.87176		56.3	0.589295
56.4	3.63197		56.4	2.08223
56.5	4.16086		56.5	2.28945
56.6	5.16265		56.6	1.60865
56.7	4.11947		56.7	0.628279
56.8	4.88163
56.9	3.05971
57	3.17541
57.1	3.27698
57.2	2.43971
57.3	1.76798
57.4	3.27567
57.5	2.61144
57.6	1.9329
57.7	2.52055
57.8	3.00941
57.9	2.12014
58	2.17634
58.1	2.50721
58.2	2.28216
58.3	0.94587
58.4	0.489822
58.5	2.15051
58.6	1.35979
58.7	2.1286
58.8	1.41515
58.9	0.687501
59	0.844816
59.1	-0.113663
59.2	0.286238
59.3	-0.322299
59.4	0.860655
59.5	-0.0340688
59.6	0.313772
59.7	-0.665088
59.8	-0.427781
59.9	-0.992491
60	0.197106
60.1	1.23597
60.2	-0.756888
60.3	0.563909
60.4	-0.243159
60.5	-0.200751
60.6	-0.123768
60.7	0.487437
60.8	-0.247985
60.9	0.235427
61	0.50884
61.1	-0.413986
61.2	0.778109
61.3	-1.40766
61.4	0.401882
61.5	0.680802
61.6	-0.415292
61.7	0.55528
61.8	0.022476
61.9	-1.01821
62	-0.850675
62.1	0.978457
62.2	-0.517992
62.3	-1.49413
62.4	-0.216079
62.5	-0.553815
62.6	-1.25966
62.7	0.317292
62.8	0.416302
62.9	0.210561
63	-0.965808
63.1	-0.0722762
63.2	-0.639256
63.3	-0.262632
63.4	-0.495283
63.5	-0.875314
63.6	-1.05914
63.7	-0.889791
63.8	-0.519525
63.9	0.702205
64	0.520422
64.1	-0.356249
64.2	-0.919766
64.3	0.350617
64.4	0.599562
64.5	-0.235325
64.6	-0.183492
64.7	0.00862364
64.8	0.171956
64.9	-0.479614
65	-1.59688
65.1	-0.387473
65.2	-0.885589
65.3	-1.80779
65.4	-0.83211
65.5	-0.720838
65.6	-0.879628
65.7	-0.893424
65.8	-0.700911
65.9	-0.817406
66	-1.24649
66.1	-0.444416
66.2	-0.564999
66.3	-1.16951
66.4	-1.11762
66.5	0.471598
66.6	-2.15001
66.7	-0.203873
66.8	-0.371691
66.9	-0.636248
67	-0.406549
67.1	-0.83035
67.2	0.593544
67.3	-0.708575
67.4	-0.0346933
67.5	-1.55675
67.6	-0.465251
67.7	-1.67642
67.8	-1.31234
67.9	-1.05187
68	-0.361699
68.1	-1.94711
68.2	-0.883716
68.3	-1.49367
68.4	0.0611376
68.5	-0.934186
68.6	-1.92241

## Sheet: Ext Data Fig 6c
Time (s)	T84		Time (s)	F188		Time (s)	A414		Time (s)	P415		Time (s)	N419
0	0.303452		0	-0.469489		0	-1.38717		0	0.35318		0	2.38151
0.1	0.00235643		0.1	0.807516		0.1	-0.952395		0.1	0.335562		0.1	-0.527146
0.2	0.0344609		0.2	-1.14143		0.2	1.46207		0.2	0.450818		0.2	0.110396
0.3	-0.109377		0.3	1.81578		0.3	-1.09114		0.3	0.372324		0.3	0.720216
0.4	-0.438563		0.4	-1.15512		0.4	0.310737		0.4	0.165282		0.4	-0.650224
0.5	-0.450195		0.5	-1.12962		0.5	1.69017		0.5	0.162662		0.5	0.16737
0.6	0.106536		0.6	1.91352		0.6	-0.966012		0.6	-0.0286349		0.6	1.05502
0.7	0.27608		0.7	-1.66849		0.7	2.7788		0.7	-0.295772		0.7	-3.08415
0.8	0.207536		0.8	-0.837193		0.8	-1.28756		0.8	-0.966987		0.8	-1.6612
0.9	0.160577		0.9	1.86453		0.9	-0.557507		0.9	-0.793102		0.9	1.48821
1	-0.054511		1	-1.10311		1	3.15491		1	-0.70663		1	2.73951
1.1	0.0585655		1.1	-0.167619		1.1	-1.10998		1.1	-0.387137		1.1	-0.386023
1.2	-0.152854		1.2	0.677573		1.2	0.00728096		1.2	-0.0685097		1.2	-0.486219
1.3	0.0453567		1.3	-1.07171		1.3	2.22294		1.3	0.475643		1.3	0.359361
1.4	-0.10689		1.4	2.86857		1.4	-0.951493		1.4	0.210618		1.4	1.26916
1.5	-0.12808		1.5	-1.16879		1.5	0.820809		1.5	-0.0466032		1.5	-0.15867
1.6	-0.368933		1.6	-0.728909		1.6	2.08982		1.6	0.128868		1.6	0.516901
1.7	-0.321688		1.7	1.77089		1.7	0.275079		1.7	0.345065		1.7	1.4777
1.8	-0.203548		1.8	-0.558987		1.8	2.67074		1.8	0.468436		1.8	2.01312
1.9	-0.302895		1.9	-1.01098		1.9	-0.70981		1.9	0.639723		1.9	0.534503
2	-0.16966		2	2.01779		2	-0.6167		2	1.15355		2	-0.121496
2.1	0.367011		2.1	-1.34736		2.1	2.75679		2.1	1.37708		2.1	-0.0141457
2.2	0.472136		2.2	3.1484		2.2	-0.832113		2.2	0.814677		2.2	1.98581
2.3	0.254078		2.3	-1.52894		2.3	-0.346601		2.3	1.01989		2.3	2.21898
2.6	-0.180972		2.4	-1.13783		2.4	2.50805		2.4	0.871694		2.4	1.92759
2.7	-0.457082		2.5	2.66132		2.5	-0.832362		2.5	0.382572		2.5	1.4243
2.8	-0.502734		2.6	-2.15687		2.6	-0.425038		2.6	0.209404		2.6	-0.940825
2.9	-0.456729		2.7	-1.20099		2.7	2.17052		2.7	-0.119008		2.7	-0.0815642
3	-0.587039		2.8	-0.345908		2.8	-0.761137		2.8	0.212686		2.8	1.49647
3.1	-0.710745		2.9	-2.85188		2.9	3.22626		2.9	0.390601		2.9	1.88149
3.2	-0.281269		3	-1.04461		3	-0.20835		3	1.02453		3	-0.356555
3.3	-0.0618036		3.1	-2.07845		3.1	-0.561548		3.1	1.19173		3.1	0.66083
3.4	-0.41287		3.2	-2.31998		3.2	2.73696		3.2	0.271368		3.2	2.39426
3.5	-0.768458		3.3	-0.432854		3.3	-0.896093		3.3	-1.10627		3.3	3.02284
3.6	-0.653014		3.4	-3.67172		3.4	0.321712		3.4	-2.64504		3.4	0.905615
3.9	-0.32463		3.5	-2.89943		3.5	2.65476		3.5	-4.64854		3.5	1.44094
4	-0.146389		3.6	0.113915		3.6	-0.738194		3.6	-6.11481		3.6	3.00134
4.1	0.367011		3.7	-4.37796		3.7	0.18315		3.7	-6.80547		3.7	0.623251
4.2	0.573495		3.8	-2.60414		3.8	2.48492		3.8	-6.75056		3.8	-0.743373
4.3	-0.152073		3.9	-1.37778		3.9	0.223845		3.9	-7.12466		3.9	-0.840802
4.4	-0.839418		4	-4.48078		4	3.60912		4	-6.91331		4	1.00356
4.5	-0.654199		4.1	-0.402643		4.1	-1.01153		4.1	-6.9653		4.1	0.872542
4.8	-0.331069		4.2	-4.66702		4.2	0.359671		4.2	-7.65258		4.2	0.715572
4.9	-0.0387576		4.3	-4.9987		4.3	3.24619		4.3	-8.28863		4.3	0.458444
5.1	0.0476876		4.4	-2.0497		4.4	0.0503077		4.4	-8.90894		4.4	1.44879
5.2	0.184212		4.5	-6.19912		4.5	0.486388		4.5	-9.29891		4.5	1.34514
5.3	-0.117687		4.6	-5.71855		4.6	2.74834		4.6	-9.78194		4.6	1.52009
5.4	-0.463101		4.7	-2.61287		4.7	0.238363		4.7	-10.0526		4.7	2.57769
5.5	-0.502734		4.8	-5.36247		4.8	3.54837		4.8	-9.83753		4.8	2.78828
5.6	-0.456729		4.9	-4.59215		4.9	-0.749075		4.9	-9.71073		4.9	0.984127
5.7	-0.587039		5	-3.78239		5	-0.161157		5	-9.69857		5	-0.370051
5.8	-0.710745		5.1	-5.80273		5.1	2.84331		5.1	-8.87256		5.1	0.505577
5.9	-0.281269		5.2	-2.14307		5.2	-0.75949		5.2	-8.69527		5.2	2.76217
6	-0.0618036		5.3	-6.29987		5.3	0.289411		5.3	-8.32279		5.3	1.34342
6.1	-0.41287		5.4	-6.35092		5.4	3.06485		5.4	-8.21344		5.4	1.71378
6.2	-0.705661		5.5	-3.07969		5.5	-0.253957		5.5	-8.45169		5.5	2.09823
6.3	-0.875982		5.6	-6.88896		5.6	0.618204		5.6	-8.63254		5.6	2.92579
6.4	-0.716733		5.7	-6.08723		5.7	1.20137		5.7	-8.94669		5.7	0.402001
6.5	-0.813684		5.8	-3.79269		5.8	-3.67228		5.8	-9.14629		5.8	-1.59747
6.6	-0.978247		5.9	-6.55349		5.9	-1.44008		5.9	-8.79763		5.9	-2.25181
6.7	-0.762581		6	-4.02531		6	-5.50241		6	-8.84873		6	0.00137231
6.8	-0.863858		6.1	-5.29127		6.1	-5.33596		6.1	-8.85007		6.1	1.06851
6.9	-0.753321		6.2	-6.605		6.2	-3.03017		6.2	-8.76778		6.2	0.519974
7	-0.813241		6.3	-3.02221		6.3	-6.58712		6.3	-9.11378		6.3	0.840327
7.1	-0.128424		6.4	-6.83496		6.4	-6.44337		6.4	-9.09101		6.4	0.967589
7.2	-0.113713		6.5	-6.91663		6.5	-3.61871		6.5	-9.63425		6.5	1.98371
7.3	-0.340789		6.6	-2.95223		6.6	-6.99454		6.6	-10.0586		6.6	3.12277
7.4	-1.00549		6.7	-7.65759		6.7	-6.28715		6.7	-9.92839		6.7	2.94665
7.5	-1.02713		6.8	-6.44345		6.8	-3.23154		6.8	-9.72005		6.8	1.57143
7.6	-0.592112		6.9	-5.46831		6.9	-7.22671		6.9	-9.46959		6.9	0.896677
7.7	-0.338103		7	-8.12889		7	-6.69332		7	-9.42665		7	1.20445
7.8	-0.410259		7.1	-4.17472		7.1	-3.85222		7.1	-9.57441		7.1	0.889716
7.9	-0.422383		7.2	-7.58704		7.2	-7.23905		7.2	-9.42332		7.2	-0.278632
8	-0.314401		7.3	-7.11108		7.3	-6.2398		7.3	-9.75307		7.3	0.952507
8.1	-0.601052		7.4	-3.86087		7.4	-5.34799		7.4	-9.94762		7.4	2.78486
8.2	-0.76109		7.5	-8.42905		7.5	-7.02115		7.5	-9.81602		7.5	3.80257
8.3	-0.804134		7.6	-7.11412		7.6	-6.17908		7.6	-9.48716		7.6	2.48913
8.4	-0.810933		7.7	-4.3309		7.7	-4.59751		7.7	-9.59901		7.7	1.20577
8.5	-0.72307		7.8	-7.4473		7.8	-7.36773		7.8	-9.5484		7.8	0.130037
8.6	-0.428309		7.9	-7.10431		7.9	-4.58106		7.9	-9.86562		7.9	0.783687
8.7	-0.421824		8	-5.47107		8	-8.10938		8	-9.59602		8	-0.344362
8.8	-0.724395		8.1	-7.33431		8.1	-7.29324		8.1	-9.71493		8.1	0.276449
8.9	-0.598573		8.2	-4.79065		8.2	-4.62325		8.2	-10.1502		8.2	-0.0129101
9	-0.348668		8.3	-8.4818		8.3	-7.48804		8.3	-10.1588		8.3	-0.99013
9.1	0.239198		8.4	-7.21376		8.4	-6.75264		8.4	-9.96011		8.4	-1.25176
9.2	1.0649		8.5	-5.47203		8.5	-4.38971		8.5	-10.2494		8.5	-0.229662
9.3	1.63359		8.6	-8.19786		8.6	-7.69599		8.6	-9.87921		8.6	2.4847
9.4	1.65241		8.7	-6.88583		8.7	-4.37566		8.7	-10.0135		8.7	1.77036
9.5	2.2679		8.8	-5.17563		8.8	-7.91703		8.8	-9.6374		8.8	-1.08171
9.6	2.90618		8.9	-7.82293		8.9	-7.01975		8.9	-9.48896		8.9	-1.43834
9.7	3.6987		9	-7.35381		9	-4.99433		9	-9.82109		9	1.0325
9.8	3.86835		9.1	-6.03092		9.1	-7.1774		9.1	-9.6105		9.1	-0.471945
9.9	3.92884		9.2	-7.71343		9.2	-7.11849		9.2	-9.65565		9.2	-1.50277
10	3.52476		9.3	-5.80444		9.3	-4.48861		9.3	-9.86561		9.3	2.08795
10.1	3.73248		9.4	-8.44707		9.4	-8.08015		9.4	-9.81965		9.4	1.33171
10.2	3.77456		9.5	-8.75438		9.5	-4.25187		9.5	-9.90288		9.5	0.396743
10.3	4.41253		9.6	-5.66296		9.6	-8.17423		9.6	-9.69093		9.6	0.579014
10.4	4.54666		9.7	-7.32797		9.7	-7.58087		9.7	-9.45227		9.7	0.0515377
10.5	4.15328		9.8	-8.81995		9.8	-4.46576		9.8	-9.69325		9.8	-2.03269
10.6	3.81898		9.9	-6.45496		9.9	-7.55342		9.9	-9.6376		9.9	-1.70084
10.7	3.92946		10	-8.54083		10	-7.35588		10	-9.58141		10	0.0911395
10.8	3.6272		10.1	-5.29539		10.1	-4.79657		10.1	-9.39904		10.1	-0.27112
10.9	3.49791		10.2	-9.1324		10.2	-7.5085		10.2	-9.06971		10.2	-1.57439
11	3.74764		10.3	-8.44122		10.3	-6.98027		10.3	-9.15817		10.3	-2.46301
11.1	3.85924		10.4	-6.74734		10.4	-4.67955		10.4	-8.73455		10.4	-1.69006
11.2	3.82878		10.5	-9.1004		10.5	-8.00781		10.5	-8.57274		10.5	-1.78059
11.3	4.07164		10.6	-9.19989		10.6	-5.04848		10.6	-8.59089		10.6	-3.8624
11.4	4.21131		10.7	-5.73231		10.7	-6.94358		10.7	-8.59917		10.7	-4.49733
11.5	3.97086		10.8	-8.8717		10.8	-7.71751		10.8	-8.58731		10.8	-0.497166
11.6	3.72383		10.9	-5.71607		10.9	-4.63472		10.9	-8.4765		10.9	1.23749
11.7	3.5692		11	-9.27601		11	-7.78634		11	-8.50127		11	-1.34453
11.8	3.59158		11.1	-9.15687		11.1	-7.00996		11.1	-8.76329		11.1	-3.75758
11.9	3.55878		11.2	-5.56605		11.2	-5.4923		11.2	-8.51203		11.2	-2.28761
12	3.59196		11.3	-9.70082		11.3	-7.07127		11.3	-8.18556		11.3	-2.5793
12.1	3.5502		11.4	-8.28094		11.4	-6.53816		11.4	-8.06601		11.4	-1.16215
12.2	3.75126		11.5	-6.02718		11.5	-5.23756		11.5	-8.129		11.5	0.507578
12.3	3.87736		11.6	-9.84296		11.6	-7.51627		11.6	-8.18914		11.6	1.5965
12.4	3.90845		11.7	-6.49789		11.7	-4.50925		11.7	-7.99348		11.7	0.243997
12.5	3.96844		11.8	-8.60253		11.8	-8.14451		11.8	-8.23043		11.8	-2.13506
12.6	4.19646		11.9	-8.95269		11.9	-7.6636		11.9	-8.10513		11.9	-3.4734
12.7	3.83361		12	-6.77758		12	-4.12331		12	-8.37059		12	-3.1563
12.8	3.8739		12.1	-10.7394		12.1	-8.28245		12.1	-8.10312		12.1	-4.00388
12.9	3.96294		12.2	-8.83581		12.2	-7.74166		12.2	-7.93717		12.2	-3.20874
13	4.29966		12.3	-6.66429		12.3	-4.973		12.3	-8.0174		12.3	-1.66718
13.1	4.37943		12.4	-9.91619		12.4	-7.86819		12.4	-7.57691		12.4	-1.45545
13.2	4.38561		12.5	-9.86562		12.5	-6.72139		12.5	-7.20256		12.5	-2.79101
13.3	3.84745		12.6	-7.16928		12.6	-5.04842		12.6	-6.93459		12.6	-2.34369
13.4	3.54715		12.7	-9.25967		12.7	-8.24981		12.7	-6.61011		12.7	-2.08045
13.5	3.49393		12.8	-7.49474		12.8	-4.94085		12.8	-6.97004		12.8	-1.39178
13.6	3.48524		12.9	-10.053		12.9	-6.59287		12.9	-7.08459		12.9	-2.18841
13.7	3.35421		13	-9.60402		13	-6.89027		13	-7.04266		13	-2.21756
13.8	3.23527		13.1	-7.15436		13.1	-4.42264		13.1	-7.17424		13.1	-4.45222
13.9	3.39969		13.2	-9.96811		13.2	-6.78858		13.2	-6.72303		13.2	-5.97886
14	3.75871		13.3	-9.75954		13.3	-5.88595		13.3	-6.79029		13.3	-6.36345
14.1	3.55615		13.4	-7.07931		13.4	-2.58626		13.4	-6.88682		13.4	-4.17568
14.2	3.57682		13.5	-10.2219		13.5	-6.41666		13.5	-6.58522		13.5	-2.86226
14.3	3.85142		13.6	-6.60779		13.6	-4.8206		13.6	-6.72257		13.6	-1.79729
14.4	3.87146		13.7	-9.98768		13.7	-2.12562		13.7	-7.01879		13.7	-2.38144
14.5	3.29053		13.8	-10.0575		13.8	-4.40731		13.8	-6.55296		13.8	-3.41699
14.6	2.87926		13.9	-7.17051		13.9	-2.91508		13.9	-5.96858		13.9	-5.14596
14.7	3.12609		14	-11.3974		14	-1.6236		14	-5.46838		14	-5.16537
14.8	3.39224		14.1	-9.73151		14.1	-3.21211		14.1	-5.72365		14.1	-4.27654
14.9	3.42279		14.2	-7.66892		14.2	0.417589		14.2	-5.8726		14.2	-2.66234
15	3.43472		14.3	-9.81722		14.3	-4.06201		14.3	-5.59778		14.3	-2.48823
15.1	3.63292		14.4	-7.76837		14.4	-3.07401		14.4	-5.79379		14.4	-2.32493
15.2	3.57001		14.5	-10.5366		14.5	-0.145053		14.5	-6.12634		14.5	-1.96639
15.3	3.08356		14.6	-10.7818		14.6	-3.70244		14.6	-5.91349		14.6	-2.75925
15.4	2.18265		14.7	-8.47801		14.7	-2.20396		14.7	-5.71138		14.7	-2.74299
15.5	1.37442		14.8	-10.1663		14.8	-0.21435		14.8	-5.49977		14.8	-2.82578
15.6	1.09139		14.9	-10.5494		14.9	-2.75563		14.9	-5.30895		14.9	-1.54398
15.7	1.09346		15	-7.40401		15	-2.44571		15	-5.20461		15	-3.30279
15.8	0.575482		15.1	-10.9769		15.1	-0.0510725		15.1	-4.93698		15.1	-4.03446
15.9	0.141959		15.2	-10.2365		15.2	-3.64707		15.2	-5.02488		15.2	-4.50188
16	0.0190156		15.3	-9.78044		15.3	-1.86127		15.3	-5.24961		15.3	-4.63165
16.1	0.160287		15.4	-10.3296		15.4	-0.35969		15.4	-5.10848		15.4	-4.01974
16.2	-0.0163864		15.5	-8.0453		15.5	-2.00947		15.5	-5.43044		15.5	-3.01064
16.3	-0.67273		15.6	-11.9636		15.6	1.06364		15.6	-5.15825		15.6	-5.62869
16.4	-0.805137		15.7	-10.6466		15.7	-3.35067		15.7	-4.89831		15.7	-6.70042
16.5	-1.06727		15.8	-8.38099		15.8	-2.22004		15.8	-4.70143		15.8	-4.33696
16.6	-1.1327		15.9	-11.433		15.9	1.42682		15.9	-4.0047		15.9	-3.35142
16.7	-1.34366		16	-9.96119		16	-3.3609		16	-4.07954		16	-3.66696
16.8	-1.6287		16.1	-10.0327		16.1	-1.57759		16.1	-4.31849		16.1	-3.68389
16.9	-1.94984		16.2	-10.6225		16.2	0.530752		16.2	-3.83966		16.2	-3.99184
17	-1.73599		16.3	-7.64584		16.3	-2.24596		16.3	-3.89774		16.3	-4.01517
17.1	-1.23303		16.4	-11.6033		16.4	-1.79953		16.4	-3.50634		16.4	-4.37478
17.2	-1.52831		16.5	-10.1193		16.5	0.770197		16.5	-3.46293		16.5	-4.49328
17.3	-2.01306		16.6	-7.80084		16.6	-1.56074		16.6	-3.32333		16.6	-4.18168
17.4	-1.90408		16.7	-11.2661		16.7	1.65862		16.7	-3.35149		16.7	-4.86651
17.5	-1.56713		16.8	-10.6318		16.8	-2.21686		16.8	-4.09887		16.8	-5.89502
17.6	-1.57237		16.9	-8.734		16.9	-1.83146		16.9	-4.31799		16.9	-3.65778
17.7	-1.6938		17	-10.8191		17	1.09374		17	-4.18372		17	-2.28107
17.8	-1.38375		17.1	-8.16559		17.1	-2.57395		17.1	-4.19025		17.1	-3.67913
17.9	-1.35266		17.2	-11.6416		17.2	-1.47699		17.2	-3.92806		17.2	-4.51467
18	-0.958123		17.3	-11.2064		17.3	0.722071		17.3	-3.94395		17.3	-2.42437
18.1	-0.87495		17.4	-8.03902		17.4	-1.32042		17.4	-4.36911		17.4	-2.58647
18.2	-1.30346		17.5	-11.2555		17.5	-0.577466		17.5	-4.62305		17.5	-6.13663
18.3	-1.74916		17.6	-11.7944		17.6	1.25552		17.6	-4.50474		17.6	-7.39872
18.4	-1.69382		17.7	-8.14364		17.7	-2.50045		17.7	-3.97842		17.7	-5.28596
18.5	-1.38669		17.8	-11.1711		17.8	-1.15202		17.8	-3.70302		17.8	-3.56998
18.6	-1.13944		17.9	-10.8079		17.9	0.838778		17.9	-3.1193		17.9	-4.93883
18.7	-1.10592		18	-9.68727		18	-1.74718		18	-2.58173		18	-6.32799
18.8	-1.46153		18.1	-10.7387		18.1	-1.02032		18.1	-2.34992		18.1	-4.86717
18.9	-1.42157		18.2	-8.5236		18.2	1.57057		18.2	-2.67039		18.2	-3.84601
19	-1.86387		18.3	-11.7514		18.3	-1.22535		18.3	-3.04884		18.3	-5.14941
19.1	-2.50397		18.4	-11.0288		18.4	-0.457837		18.4	-2.94582		18.4	-6.22814
19.2	-2.15821		18.5	-7.93005		18.5	0.987973		18.5	-3.09455		18.5	-4.91531
19.3	-1.59981		18.6	-11.6618		18.6	-0.6407		18.6	-2.86436		18.6	-4.54567
19.4	-1.30607		18.7	-10.7812		18.7	1.67024		18.7	-2.62692		18.7	-5.25606
19.5	-1.38808		18.8	-9.2525		18.8	-2.04466		18.8	-2.11224		18.8	-5.30177
19.6	-1.15483		18.9	-11.0072		18.9	-0.962872		18.9	-1.68825		18.9	-3.67808
19.7	-1.67719		19	-10.9992		19	1.14587		19	-1.5699		19	-3.31492
19.8	-1.62664		19.1	-9.78738		19.1	-1.34268		19.1	-2.1929		19.1	-5.42567
19.9	-1.34944		19.2	-10.585		19.2	-0.942042		19.2	-2.05474		19.2	-5.53428
20	-0.828185		19.3	-8.83106		19.3	1.1348		19.3	-2.28071		19.3	-3.56439
20.1	-1.18425		19.4	-11.9372		19.4	-1.13722		19.4	-2.14914		19.4	-4.49473
20.2	-1.41439		19.5	-10.6947		19.5	2.4433		19.5	-2.17964		19.5	-5.05067
20.3	-1.63247		19.6	-8.56165		19.6	-1.45476		19.6	-1.87908		19.6	-6.04129
20.4	-1.28466		19.7	-11.8489		19.7	-1.1643		19.7	-1.84793		19.7	-5.91945
20.5	-1.39639		19.8	-11.1563		19.8	2.23876		19.8	-1.94747		19.8	-6.89338
20.6	-1.46001		19.9	-8.95698		19.9	-1.38073		19.9	-2.32368		19.9	-5.5094
20.7	-1.62376		20	-11.8248		20	-0.398115		20	-2.19779		20	-5.34598
20.8	-1.41933		20.1	-9.97449		20.1	1.85127		20.1	-2.02113		20.1	-4.89247
20.9	-0.959651		20.2	-11.8615		20.2	-1.42628		20.2	-1.56227		20.2	-7.37898
21	-0.507956		20.3	-12.0502		20.3	-1.08639		20.3	-1.22845		20.3	-6.6369
21.1	-0.274654		20.4	-8.88903		20.4	1.35218		20.4	-0.971169		20.4	-6.28477
21.2	0.202852		20.5	-12.2371		20.5	-1.15177		20.5	-1.14436		20.5	-7.3807
21.3	0.443552		20.6	-10.9592		20.6	2.2885		20.6	-1.48216		20.6	-7.15874
21.4	0.32393		20.7	-9.72891		20.7	-1.03944		20.7	-1.79543		20.7	-4.54431
21.5	0.246999		20.8	-12.9085		20.8	-1.11766		20.8	-1.76557		20.8	-3.32052
21.6	0.883283		20.9	-10.8049		20.9	2.6575		20.9	-1.64863		20.9	-5.33648
21.7	0.976808		21	-10.148		21	-2.01852		21	-1.54038		21	-6.7041
21.8	0.84873		21.1	-12.2989		21.1	-0.412789		21.1	-1.46216		21.1	-6.5914
21.9	1.16827		21.2	-8.8723		21.2	1.54807		21.2	-1.24718		21.2	-5.03263
22	1.88014		21.3	-11.5156		21.3	-0.480998		21.3	-1.16103		21.3	-4.87201
22.1	1.8478		21.4	-10.9967		21.4	-0.347347		21.4	-1.38994		21.4	-3.80268
22.2	2.17472		21.5	-8.73545		21.5	1.84897		21.5	-1.54432		21.5	-2.68868
22.3	2.60582		21.6	-11.6083		21.6	-1.02135		21.6	-1.3411		21.6	-5.00997
22.4	2.76822		21.7	-10.1298		21.7	2.44877		21.7	-1.5048		21.7	-7.58069
22.5	2.56663		21.8	-8.77435		21.8	-1.26459		21.8	-1.43839		21.8	-6.74436
22.6	2.97676		21.9	-10.0453		21.9	-0.820113		21.9	-1.64365		21.9	-4.83497
22.7	3.21677		22	-6.67474		22	1.74958		22	-1.33605		22	-6.31074
22.8	3.37913		22.1	-9.69207		22.1	-0.730298		22.1	-0.936645		22.1	-8.29223
22.9	3.54556		22.2	-9.63196		22.2	-0.457557		22.2	-1.11599		22.2	-6.74592
23	3.85443		22.3	-6.4842		22.3	1.5772		22.3	-1.15005		22.3	-6.83755
23.1	3.85701		22.4	-10.5879		22.4	-0.306341		22.4	-0.932056		22.4	-8.4706
23.2	3.86719		22.5	-8.64832		22.5	2.17093		22.5	-0.755598		22.5	-7.03261
23.3	4.13284		22.6	-6.29242		22.6	-1.57784		22.6	-0.651386		22.6	-4.72698
23.4	4.11189		22.7	-8.8504		22.7	-1.19793		22.7	-0.811348		22.7	-4.38806
23.5	3.71075		22.8	-4.89919		22.8	2.88519		22.8	-0.877541		22.8	-6.12532
23.6	3.79882		22.9	-8.18306		22.9	-0.918197		22.9	-0.932138		22.9	-5.90014
23.7	4.34255		23	-8.07808		23	-0.884995		23	-1.01383		23	-6.15404
23.8	4.7768		23.1	-5.50249		23.1	2.48374		23.1	-0.825236		23.1	-5.2096
23.9	4.65542		23.2	-7.6529		23.2	-0.910487		23.2	-0.521973		23.2	-6.6731
24	5.18667		23.3	-8.99623		23.3	-0.560056		23.3	-0.338343		23.3	-5.72365
24.1	5.1949		23.4	-4.73155		23.4	2.10076		23.4	-0.171208		23.4	-4.44432
24.2	5.5868		23.5	-8.05077		23.5	-1.28392		23.5	-0.232401		23.5	-5.39349
24.3	5.30625		23.6	-3.97588		23.6	2.58313		23.6	-0.702206		23.6	-4.57454
24.4	5.30647		23.7	-8.06311		23.7	-1.36852		23.7	-0.570349		23.7	-4.40566
24.5	5.14389		23.8	-7.19551		23.8	-0.446769		23.8	-0.6842		23.8	-2.84114
24.6	5.16674		23.9	-4.55207		23.9	2.3776		23.9	-0.5016		23.9	-5.0873
24.7	5.46527		24	-8.33599		24	-2.69327		24	-0.289388		24	-6.29181
24.8	5.78913		24.1	-6.94715		24.1	-4.88396		24.1	-0.0974121		24.1	-5.81369
24.9	5.87808		24.2	-4.2427		24.2	-5.12048		24.2	0.260729		24.2	-5.00091
25	5.72909		24.3	-7.43631		24.3	-10.3956		24.3	-0.16727		24.3	-7.10922
25.1	5.82748		24.4	-3.74984		24.4	-11.2943		24.4	-0.363207		24.4	-7.71606
25.2	5.93069		24.5	-7.10944		24.5	-8.9013		24.5	0.0592805		24.5	-5.47506
25.3	5.96115		24.6	-7.06258		24.6	-12.9767		24.6	-0.267981		24.6	-7.85039
25.4	6.26842		24.7	-3.40625		24.7	-12.6258		24.7	-0.0921444		24.7	-8.51509
25.5	6.12765		24.8	-7.40702		24.8	-10.7483		24.8	0.221211		24.8	-7.2771
25.6	5.75607		24.9	-7.13308		24.9	-13.2209		24.9	0.283156		24.9	-4.6989
25.7	6.21431		25	-4.83289		25	-10.3555		25	0.0715102		25	-5.39462
25.8	6.88446		25.1	-7.22274		25.1	-14.0981		25.1	-0.39244		25.1	-6.75842
25.9	6.63923		25.2	-5.49048		25.2	-14.0413		25.2	-0.528535		25.2	-7.51891
26	6.42356		25.3	-4.01937		25.3	-10.4001		25.3	-0.0124093		25.3	-6.30637
26.1	6.62563		25.4	-5.2779		25.4	-14.2813		25.4	-0.264056		25.4	-6.61154
26.2	7.08189		25.5	-2.759		25.5	-13.8519		25.5	-0.532265		25.5	-6.2544
26.3	7.01145		25.6	-6.86978		25.6	-11.8321		25.6	-0.464544		25.6	-5.24514
26.4	6.9652		25.7	-5.81897		25.7	-14.3573		25.7	-0.394097		25.7	-4.82088
26.5	6.84715		25.8	-3.95006		25.8	-13.7526		25.8	-0.462721		25.8	-4.91987
26.6	6.73206		25.9	-6.29818		25.9	-11.9492		25.9	-0.0971442		25.9	-5.76117
26.7	6.94672		26	-5.97151		26	-14.3915		26	-0.0432301		26	-7.74316
26.8	7.02248		26.1	-3.59096		26.1	-11.4057		26.1	0.445055		26.1	-6.95799
26.9	7.11409		26.2	-6.36448		26.2	-14.6696		26.2	0.209924		26.2	-5.9451
27	7.09117		26.3	-3.72509		26.3	-13.828		26.3	-0.147607		26.3	-5.53515
27.1	7.31605		26.4	-6.07607		26.4	-12.6602		26.4	0.126217		26.4	-7.10038
27.2	7.61004		26.5	-5.148		26.5	-14.5092		26.5	0.0697016		26.5	-7.94813
27.3	7.57149		26.6	-3.03811		26.6	-14.0217		26.6	0.109534		26.6	-5.67938
27.4	7.74856		26.7	-6.61039		26.7	-12.2673		26.7	0.296451		26.7	-5.4833
27.5	7.87079		26.8	-5.84268		26.8	-15.1182		26.8	0.116003		26.8	-4.37329
27.6	7.95265		26.9	-3.92258		26.9	-12.5829		26.9	0.467893		26.9	-5.76202
27.7	7.64626		27	-5.89576		27	-14.6746		27	0.673729		27	-5.81723
27.8	7.2123		27.1	-2.56231		27.1	-14.8976		27.1	0.779162		27.1	-5.97508
27.9	7.61877		27.2	-5.29288		27.2	-12.0321		27.2	1.24723		27.2	-4.09435
28	7.77783		27.3	-5.70503		27.3	-14.6137		27.3	0.87067		27.3	-3.97257
28.1	8.00168		27.4	-2.16348		27.4	-14.4309		27.4	1.10059		27.4	-4.18012
28.2	7.83705		27.5	-6.25064		27.5	-12.4991		27.5	0.837914		27.5	-2.80382
28.3	7.70038		27.6	-5.83526		27.6	-14.9282		27.6	0.491404		27.6	-1.72759
28.4	7.47797		27.7	-2.41547		27.7	-14.1071		27.7	0.64788		27.7	1.39987
28.5	7.94689		27.8	-5.86258		27.8	-13.1657		27.8	1.08778		27.8	0.227396
28.6	8.44484		27.9	-5.63269		27.9	-14.5662		27.9	1.30414		27.9	-1.40072
28.7	8.61218		28	-2.86735		28	-11.4566		28	1.49429		28	-1.2525
28.8	8.45301		28.1	-5.44146		28.1	-15.0079		28.1	0.937964		28.1	0.459882
28.9	8.35577		28.2	-2.22739		28.2	-14.6701		28.2	0.93948		28.2	0.470443
29	8.29433		28.3	-6.22023		28.3	-12.5844		28.3	0.659254		28.3	-0.0171549
29.1	8.97685		28.4	-4.69217		28.4	-15.6545		28.4	0.188638		28.4	-1.84418
29.2	8.6457		28.5	-1.70526		28.5	-14.5685		28.5	0.428345		28.5	-1.27646
29.3	8.52294		28.6	-6.11105		28.6	-12.4383		28.6	0.714645		28.6	-0.23148
29.4	8.53616		28.7	-4.99208		28.7	-15.1771		28.7	0.654869		28.7	-0.379602
29.5	8.79689		28.8	-2.06943		28.8	-14.6249		28.8	0.87021		28.8	-1.19168
29.6	8.35394		28.9	-5.29053		28.9	-12.6805		28.9	0.511606		28.9	-1.19238
29.7	8.60997		29	-5.00954		29	-14.5806		29	0.77121		29	0.158333
29.8	9.13399		29.1	-3.98877		29.1	-12.5743		29.1	1.08953		29.1	0.218323
29.9	9.22714		29.2	-4.66212		29.2	-15.5774		29.2	1.17024		29.2	-0.339353
30	9.34242		29.3	-2.16338		29.3	-14.896		29.3	1.60659		29.3	-0.625825
30.1	9.46702		29.4	-5.81116		29.4	-12.0121		29.4	1.31242		29.4	1.23765
30.2	9.97835		29.5	-4.63198		29.5	-15.7898		29.5	1.06045		29.5	-1.52423
30.3	10.0492		29.6	-1.42065		29.6	-14.4749		29.6	0.902937		29.6	-0.0571668
30.4	9.73345		29.7	-5.72158		29.7	-12.417		29.7	0.750004		29.7	2.06331
30.5	9.31122		29.8	-4.43654		29.8	-14.9667		29.8	0.923853		29.8	2.11801
30.6	9.63486		29.9	-2.36395		29.9	-11.8754		29.9	0.63303		29.9	-1.70295
30.7	9.70113		30	-4.63794		30	-15.65		30	0.800876		30	-2.41271
30.8	9.3643		30.1	-0.0437816		30.1	-14.7594		30.1	1.09399		30.1	0.425765
30.9	9.58739		30.2	-5.64152		30.2	-11.815		30.2	0.931866		30.2	1.95681
31	9.62213		30.3	-4.75589		30.3	-15.2427		30.3	1.03851		30.3	-1.03407
31.1	9.44253		30.4	-1.48598		30.4	-15.31		30.4	1.0975		30.4	-3.63933
31.2	9.27155		30.5	-4.94058		30.5	-12.288		30.5	1.39498		30.5	-0.88506
31.3	10.1265		30.6	-4.38046		30.6	-15.2208		30.6	1.39546		30.6	0.928075
31.4	10.4991		30.7	-1.95264		30.7	-14.613		30.7	1.04785		30.7	0.272563
31.5	10.0478		30.8	-4.36079		30.8	-12.4787		30.8	1.47721		30.8	-0.697232
31.6	9.42872		30.9	-4.14163		30.9	-15.266		30.9	1.67161		30.9	0.649253
31.7	9.21728		31	-2.0758		31	-14.6789		31	1.62056		31	0.19898
31.8	9.42997		31.1	-4.9951		31.1	-12.7838		31.1	1.91888		31.1	-0.591225
31.9	9.76379		31.2	-0.451569		31.2	-15.0074		31.2	1.93313		31.2	-0.782072
32	9.97707		31.3	-4.58823		31.3	-15.5066		31.3	1.76947		31.3	0.46893
32.1	9.89283		31.4	-4.38441		31.4	-13.1614		31.4	1.80431		31.4	-0.0414223
32.2	9.78372		31.5	-1.33749		31.5	-15.1086		31.5	1.8422		31.5	0.81012
32.3	10.1708		31.6	-4.28996		31.6	-13.3976		31.6	2.3246		31.6	0.569788
32.4	10.2607		31.7	-4.87731		31.7	-11.386		31.7	2.0034		31.7	-1.26688
32.5	10.4525		31.8	-1.56628		31.8	-12.0527		31.8	0.912519		31.8	-0.0579028
32.6	10.4811		31.9	-4.64866		31.9	-7.85342		31.9	-0.793261		31.9	1.76502
32.7	10.4245		32	-3.94091		32	-9.9595		32	-3.35072		32	2.4957
32.8	9.84687		32.1	-2.27092		32.1	-7.43121		32.1	-6.3165		32.1	-0.2672
32.9	9.65862		32.2	-4.04965		32.2	-3.05439		32.2	-8.74184		32.2	0.138888
33	10.0392		32.3	-2.14294		32.3	-5.01453		32.3	-10.5008		32.3	1.12858
33.1	10.114		32.4	-4.56702		32.4	-3.39777		32.4	-11.5109		32.4	2.3854
33.2	9.90336		32.5	-4.74256		32.5	-0.381794		32.5	-12.4321		32.5	-1.44282
33.3	10.1711		32.6	-1.6514		32.6	-2.87414		32.6	-12.7614		32.6	-1.54355
33.4	10.6697		32.7	-5.10686		32.7	-1.47602		32.7	-13.426		32.7	-0.618996
33.5	10.6637		32.8	-4.17883		32.8	1.23908		32.8	-13.8713		32.8	1.76646
33.6	10.4142		32.9	-1.74901		32.9	-1.64828		32.9	-14.188		32.9	2.06379
33.7	10.3536		33	-4.13302		33	1.06206		33	-14.2848		33	1.2292
33.8	10.5283		33.1	-1.34727		33.1	-1.08816		33.1	-14.0307		33.1	-0.520727
33.9	10.5447		33.2	-4.87233		33.2	-0.346912		33.2	-13.9937		33.2	-0.136881
34	10.4502		33.3	-3.68075		33.3	2.40801		33.3	-13.9081		33.3	-0.78474
34.1	10.5267		33.4	-1.48874		33.4	-0.83547		33.4	-13.3728		33.4	-1.75916
34.2	11.0026		33.5	-4.13406		33.5	-0.349151		33.5	-13.6254		33.5	-2.17024
34.3	10.9232		33.6	-3.84406		33.6	2.54831		33.6	-13.4378		33.6	0.143527
34.4	10.6881		33.7	-1.31181		33.7	-0.596772		33.7	-13.5598		33.7	-0.875913
34.5	10.4974		33.8	-3.80338		33.8	0.237586		33.8	-14.1529		33.8	-1.41718
34.6	10.743		33.9	-0.747859		33.9	2.22005		33.9	-14.5349		33.9	-0.431722
34.7	10.6595		34	-4.54994		34	-0.270154		34	-14.7828		34	1.9207
34.8	10.8643		34.1	-4.16393		34.1	3.61273		34.1	-14.7135		34.1	-0.220712
34.9	10.3886		34.2	-0.954226		34.2	-0.756163		34.2	-15.0295		34.2	-0.797344
35	10.1367		34.3	-4.7242		34.3	0.366044		34.3	-15.2724		34.3	-0.344594
35.1	10.3883		34.4	-3.87601		34.4	3.46866		34.4	-15.3773		34.4	-0.0433483
35.2	11.1237		34.5	-1.27065		34.5	-0.316041		34.5	-15.4554		34.5	1.22565
35.3	11.7655		34.6	-4.61903		34.6	0.563395		34.6	-15.7928		34.6	3.26459
35.4	11.5473		34.7	-2.38805		34.7	3.07477		34.7	-15.7826		34.7	3.55285
35.5	11.0051		34.8	-2.69178		34.8	-0.0639742		34.8	-15.4416		34.8	2.18173
35.6	10.8574		34.9	-4.29324		34.9	0.975071		34.9	-15.1769		34.9	0.808552
35.7	11.3885		35	-1.1925		35	3.22179		35	-15.4852		35	0.853594
35.8	11.3748		35.1	-4.01511		35.1	-0.310507		35.1	-15.2932		35.1	2.21867
35.9	10.8396		35.2	-3.64483		35.2	2.83784		35.2	-15.2945		35.2	2.1252
36	10.8026		35.3	-0.800605		35.3	0.115532		35.3	-15.2148		35.3	0.531362
36.1	10.998		35.4	-3.81956		35.4	1.0647		35.4	-15.0848		35.4	-0.257043
36.2	11.0516		35.5	-3.07312		35.5	3.69191		35.5	-15.2087		35.5	-0.504766
36.3	11.2771		35.6	-1.57047		35.6	0.0963189		35.6	-15.3937		35.6	0.0473246
36.4	10.7697		35.7	-3.17658		35.7	0.741004		35.7	-15.7006		35.7	-0.284928
36.5	10.6862		35.8	-1.11183		35.8	4.40129		35.8	-15.9121		35.8	0.557849
36.6	10.3557		35.9	-4.55024		35.9	-0.123509		35.9	-15.9594		35.9	1.16171
36.7	10.9961		36	-3.63451		36	1.19561		36	-16.1123		36	0.701677
36.8	10.8513		36.1	-1.43839		36.1	2.53538		36.1	-16.0795		36.1	0.452128
36.9	10.9934		36.2	-4.3017		36.2	0.488378		36.2	-15.4898		36.2	1.05814
37	10.5335		36.3	-3.593		36.3	1.35958		36.3	-15.564		36.3	1.35801
37.1	10.3787		36.4	-0.797852		36.4	3.07191		36.4	-15.6195		36.4	-0.0319341
37.2	10.4069		36.5	-3.29919		36.5	0.401019		36.5	-15.7936		36.5	-0.644929
37.3	10.4779		36.6	0.189834		36.6	3.85161		36.6	-15.8218		36.6	-0.36411
37.4	10.5981		36.7	-4.46669		36.7	0.126724		36.7	-16.0665		36.7	1.06957
37.5	10.1627		36.8	-3.96323		36.8	1.12367		36.8	-16.1313		36.8	1.69594
37.6	9.97043		36.9	-0.0791468		36.9	4.15877		36.9	-16.2631		36.9	2.10711
37.7	9.54537		37	-4.13892		37	0.279431		37	-16.306		37	1.7607
37.8	9.36886		37.1	-3.5509		37.1	1.18744		37.1	-16.4605		37.1	-0.131103
37.9	8.38831		37.2	-0.892427		37.2	3.61565		37.2	-16.4536		37.2	1.40933
38	7.87964		37.3	-4.10565		37.3	0.432481		37.3	-16.4784		37.3	1.83337
38.1	7.33515		37.4	-1.17117		37.4	1.73528		37.4	-16.3979		37.4	2.14788
38.2	6.73475		37.5	-3.72227		37.5	2.44976		37.5	-16.0884		37.5	0.594877
38.3	5.43711		37.6	-4.35881		37.6	0.898904		37.6	-16.0016		37.6	0.159797
38.4	4.8698		37.7	-1.32045		37.7	1.68542		37.7	-15.9764		37.7	1.35045
38.5	4.86824		37.8	-4.26803		37.8	3.65827		37.8	-16.0537		37.8	2.0812
38.6	5.02445		37.9	-4.27381		37.9	0.814094		37.9	-16.4334		37.9	-0.175912
38.7	4.643		38	-2.35468		38	3.59762		38	-16.3207		38	-0.96202
38.8	4.47523		38.1	-5.79967		38.1	-0.0689795		38.1	-16.4259		38.1	0.491966
38.9	3.94287		38.2	-4.45767		38.2	1.05059		38.2	-16.4213		38.2	-0.658205
39	3.34127		38.3	-3.29842		38.3	3.58863		38.3	-15.7832		38.3	-0.198034
39.1	2.74221		38.4	-5.50192		38.4	0.11205		38.4	-15.3336		38.4	0.962761
39.2	2.44487		38.5	-3.35177		38.5	1.12029		38.5	-15.0689		38.5	1.81546
39.3	2.53397		38.6	-6.47391		38.6	3.98445		38.6	-15.5917		38.6	0.129087
39.4	2.67761		38.7	-5.08753		38.7	0.645065		38.7	-15.9705		38.7	-1.36171
39.5	2.27873		38.8	-3.38345		38.8	1.67715		38.8	-15.9815		38.8	-0.579017
39.6	1.26017		38.9	-6.42153		38.9	3.22549		38.9	-16.3293		38.9	3.34396
39.7	1.04587		39	-6.38146		39	-0.00248088		39	-16.3293		39	3.42558
39.8	1.72305		39.1	-4.26539		39.1	1.01132		39.1	-15.6195		39.1	0.717704
39.9	1.83703		39.2	-6.78923		39.2	2.8578		39.2	-15.2897		39.2	0.543564
40	1.52388		39.3	-3.79843		39.3	1.27819		39.3	-15.3894		39.3	0.597178
40.1	1.35544		39.4	-7.29797		39.4	4.33942		39.4	-15.7814		39.4	0.467805
40.2	1.31286		39.5	-6.67331		39.5	0.0572094		39.5	-15.6582		39.5	1.18893
40.3	1.20127		39.6	-3.98118		39.6	1.1307		39.6	-15.4328		39.6	3.14687
40.4	0.921402		39.7	-7.99123		39.7	1.34565		39.7	-15.5914		39.7	4.32563
40.5	0.459101		39.8	-6.22827					39.8	-15.6678		39.8	4.03039
40.6	-0.0325887		39.9	-4.20049					39.9	-15.1675		39.9	2.57779
40.7	0.350174		40	-7.77566					40	-15.3814		40	1.21203
40.8	0.77956		40.1	-7.75068					40.1	-15.4137		40.1	-0.221645
40.9	0.267189		40.2	-4.63129					40.2	-15.767		40.2	-0.212538
41	-0.213961		40.3	-6.41652					40.3	-16.0988		40.3	2.48165
41.1	0.00726832		40.4	-4.59507					40.4	-15.9722		40.4	3.8023
41.2	0.411983		40.5	-7.35733					40.5	-16.1644		40.5	2.51615
41.3	0.0908755		40.6	-7.08047					40.6	-16.5708		40.6	0.893174
41.4	0.329154		40.7	-4.2214					40.7	-16.3557		40.7	2.33489
41.5	0.778913		40.8	-7.17701					40.8	-16.3242		40.8	1.83506
41.6	0.947908		40.9	-7.40162					40.9	-16.252		40.9	-2.32715
41.7	0.234202		41	-5.20026					41	-16.3764		41	-4.27625
41.8	-0.109871		41.1	-7.25743					41.1	-16.4085		41.1	-3.46136
41.9	-0.412172		41.2	-5.53293					41.2	-16.1797		41.2	-6.03928
42	-0.21019		41.3	-7.91943					41.3	-15.8905		41.3	-7.99887
42.1	-0.116887		41.4	-7.13915					41.4	-16.1202		41.4	-7.06063
42.2	0.271792		41.5	-4.48827					41.5	-15.8613		41.5	-3.82199
42.3	-0.10822		41.6	-8.79613					41.6	-15.593		41.6	-4.42528
42.4	-0.117605		41.7	-7.28512					41.7	-15.7798		41.7	-6.31696
42.5	-0.0613437		41.8	-5.1895					41.8	-15.9013		41.8	-8.43254
42.6	-0.361217		41.9	-7.65889					41.9	-15.6895		41.9	-6.21524
42.7	-0.830587		42	-6.81948					42	-15.8245		42	-5.34614
42.8	-0.546866		42.1	-4.61877					42.1	-16.1175		42.1	-4.52431
42.9	-0.490013		42.2	-8.22452					42.2	-16.5546		42.2	-5.58036
43	-0.530487		42.3	-4.83488					42.3	-16.7043		42.3	-7.2351
43.1	-0.767601		42.4	-9.48902					42.4	-16.4833		42.4	-6.4885
43.2	-0.976559		42.5	-7.78056					42.5	-16.8514		42.5	-5.74979
43.3	-1.08063		42.6	-4.21818					42.6	-16.9324		42.6	-4.8653
43.4	-0.204731		42.7	-7.95369					42.7	-16.5324		42.7	-5.09998
43.5	-0.282004		42.8	-7.29212					42.8	-16.5376		42.8	-3.90731
43.6	-0.682729		42.9	-5.72943					42.9	-16.5566		42.9	-4.93749
43.7	-0.761133		43	-7.63086					43	-16.3295		43	-3.78789
43.8	-0.348912		43.1	-5.17329					43.1	-15.9991		43.1	-5.262
43.9	-0.939552		43.2	-8.24137					43.2	-15.7125		43.2	-5.34725
44	-1.35059		43.3	-8.23316					43.3	-16.1019		43.3	-6.29654
44.1	-0.854776		43.4	-4.63714					43.4	-16.6116		43.4	-5.94888
44.2	-0.710646		43.5	-8.4946					43.5	-16.7198		43.5	-6.83334
44.3	-1.06613		43.6	-7.66655					43.6	-17.0544		43.6	-6.17587
44.4	-1.0086		43.7	-5.4965					43.7	-17.0052		43.7	-7.25855
44.5	-0.538469		43.8	-7.73577					43.8	-16.3838		43.8	-7.71537
44.6	-0.506518		43.9	-5.41683					43.9	-16.0225		43.9	-6.71313
44.7	-1.01976		44	-7.14147					44	-15.6688		44	-4.91506
44.8	-1.06525		44.1	-8.13071					44.1	-15.4079		44.1	-5.62054
44.9	-1.1841		44.2	-4.18407					44.2	-15.3748		44.2	-8.33394
45	-0.800481		44.3	-8.00275					44.3	-15.2387		44.3	-7.54446
45.1	-0.841863		44.4	-7.41547					44.4	-14.9267		44.4	-6.10088
45.2	-0.705104		44.5	-5.23738					44.5	-15.1345		44.5	-5.61912
45.3	-0.9953		44.6	-8.707					44.6	-15.1221		44.6	-6.50518
45.4	-0.510729		44.7	-5.09517					44.7	-15.2161		44.7	-7.25531
45.5	-0.118625		44.8	-6.27467					44.8	-14.8213		44.8	-7.59933
45.6	-0.0576444		44.9	-7.4512					44.9	-14.5301		44.9	-7.89859
45.7	-0.509328		45	-4.64155					45	-14.1344		45	-8.63012
45.8	-0.824985		45.1	-7.41114					45.1	-13.9093		45.1	-7.72225
45.9	-0.67723		45.2	-8.86768					45.2	-13.1905		45.2	-6.60359
46	-1.05632		45.3	-4.80929					45.3	-13.021		45.3	-8.38419
46.1	-1.1223		45.4	-8.4268					45.4	-12.8107		45.4	-7.17065
46.2	-1.24013		45.5	-6.89859					45.5	-12.0855		45.5	-5.98153
46.3	-0.996995		45.6	-4.69709					45.6	-11.2602		45.6	-5.31282
46.4	-0.961639		45.7	-8.12727					45.7	-11.1174		45.7	-7.26878
46.5	-0.180069		45.8	-3.99398					45.8	-11.0294		45.8	-7.46177
46.6	0.274566		45.9	-9.00632					45.9	-11.5417		45.9	-6.95889
46.7	-0.347331		46	-7.70632					46	-11.4993		46	-4.88371
46.8	-0.431243		46.1	-5.38595					46.1	-10.9762		46.1	-6.66639
46.9	-0.531748		46.2	-7.78165					46.2	-11.0711		46.2	-8.09036
47	-0.680768		46.3	-6.47539					46.3	-10.2138		46.3	-9.39159
47.1	-1.40587		46.4	-4.81717					46.4	-9.47081		46.4	-6.76325
47.2	-1.09095		46.5	-7.47692					46.5	-9.21064		46.5	-7.04805
47.3	-0.909577		46.6	-5.32696					46.6	-8.85975		46.6	-6.93254
47.4	-0.859214		46.7	-7.35931					46.7	-9.02807		46.7	-7.78727
47.5	-1.15082		46.8	-8.91136					46.8	-8.67608		46.8	-6.44023
47.6	-0.900521		46.9	-5.36089					46.9	-8.2294		46.9	-7.97504
47.7	-0.778468		47	-7.95275					47	-8.34877		47	-8.5157
47.8	-0.438211		47.1	-7.21985					47.1	-7.99179		47.1	-8.11772
47.9	-0.451454		47.2	-6.17367					47.2	-7.91121		47.2	-8.33809
48	-0.568187		47.3	-8.01056					47.3	-7.04098		47.3	-8.05262
48.1	-0.998257		47.4	-4.80838					47.4	-6.48533		47.4	-8.05499
48.2	-1.09994		47.5	-7.16225					47.5	-6.34384		47.5	-7.68707
48.3	-0.626699		47.6	-8.11051					47.6	-6.1291		47.6	-8.55162
48.4	-0.417409		47.7	-4.99821					47.7	-5.78979		47.7	-8.98778
48.5	-0.61826		47.8	-8.60155					47.8	-5.38617		47.8	-8.43289
48.6	-0.82838		47.9	-7.35505					47.9	-5.18369		47.9	-7.66609
48.7	-0.541183		48	-5.82207					48	-4.93945		48	-9.33227
48.8	-0.497995		48.1	-7.72898					48.1	-4.1561		48.1	-9.11647
48.9	-0.822253		48.2	-6.87272					48.2	-4.29091		48.2	-7.69289
49	-0.645645		48.3	-5.73474					48.3	-4.69737		48.3	-7.34054
49.1	-0.322135		48.4	-7.39702					48.4	-4.8402		48.4	-8.74186
49.2	-0.144093		48.5	-4.96891					48.5	-4.80101		48.5	-10.1583
49.3	-0.131161		48.6	-7.91191					48.6	-4.4748		48.6	-10.8799
49.4	-0.0174527		48.7	-7.52194					48.7	-4.07157		48.7	-10.6698
49.5	-0.508265		48.8	-4.77099					48.8	-3.47735		48.8	-10.9141
49.6	-0.804712		48.9	-8.41703					48.9	-2.79479		48.9	-10.2438
49.7	-0.84008		49	-7.22118					49	-2.77616		49	-8.08213
49.8	-0.534175		49.1	-5.5277					49.1	-2.5989		49.1	-9.53001
49.9	-0.605382		49.2	-7.84866					49.2	-2.44863		49.2	-10.0476
50	-0.137709		49.3	-4.32208					49.3	-2.39661		49.3	-9.43112
50.1	-0.167243		49.4	-7.32834					49.4	-2.16523		49.4	-8.09815
50.2	-0.421958		49.5	-7.87271					49.5	-1.88624		49.5	-8.61255
50.3	-0.476113		49.6	-5.51513					49.6	-1.59605		49.6	-8.59119
50.4	-0.186946		49.7	-9.13833					49.7	-0.905611		49.7	-8.00729
50.5	-0.363743		49.8	-7.47444					49.8	-1.44228		49.8	-7.84208
50.6	-0.684555		49.9	-5.31402					49.9	-1.40947		49.9	-7.66366
50.7	-0.615573		50	-8.64365					50	-1.77922		50	-7.5949
50.8	-0.538168		50.1	-7.36379					50.1	-1.32424		50.1	-7.58031
50.9	-0.365154		50.2	-5.10386					50.2	-1.21566		50.2	-9.51101
51	-0.298812		50.3	-8.78545					50.3	-1.18841		50.3	-9.60911
51.1	-0.0227595		50.4	-4.6732					50.4	-0.708741		50.4	-7.87533
51.2	-0.0691437		50.5	-7.64893					50.5	-0.370046		50.5	-7.7663
51.3	0.234713		50.6	-7.88792					50.6	-0.995833		50.6	-8.21164
51.4	-0.0455263		50.7	-5.2246					50.7	-0.935204		50.7	-8.68766
51.5	0.184334		50.8	-8.66426					50.8	-0.978662		50.8	-7.12551
51.6	0.277016		50.9	-7.96855					50.9	-0.520018		50.9	-7.13063
51.7	0.569321		51	-5.23647					51	-0.586571		51	-8.03012
51.8	0.193563		51.1	-7.5143					51.1	-0.327251		51.1	-9.83058
51.9	0.317145		51.2	-4.08019					51.2	0.120535		51.2	-8.52458
52	0.0921636		51.3	-8.78939					51.3	0.125632		51.3	-8.29455
52.1	0.0583001		51.4	-7.66489					51.4	0.0272356		51.4	-7.2108
52.2	0.0344609		51.5	-4.81858					51.5	0.329515		51.5	-8.74686
52.3	-0.109377		51.6	-8.02337					51.6	0.571		51.6	-7.59023
52.4	-0.438563		51.7	-7.17904					51.7	0.562927		51.7	-7.2545
52.5	-0.450195		51.8	-5.04814					51.8	0.702325		51.8	-7.813
52.6	0.106536		51.9	-8.04474					51.9	1.0448		51.9	-9.88689
52.7	0.27608		52	-5.04284					52	1.16009		52	-8.63617
52.8	0.207536		52.1	-8.93628					52.1	1.35997		52.1	-7.92316
52.9	0.160577		52.2	-6.85347					52.2	1.47116		52.2	-5.34885
53	-0.054511		52.3	-3.70324					52.3	1.16871		52.3	-4.96591
53.1	0.0585655		52.4	-8.12012					52.4	0.957566		52.4	-7.80888
53.2	-0.152854		52.5	-6.16946					52.5	0.556357		52.5	-10.241
53.3	0.0453567		52.6	-3.39533					52.6	0.233504		52.6	-7.81504
53.4	-0.10689		52.7	-6.37873					52.7	0.160986		52.7	-6.49337
53.5	-0.12808		52.8	-4.52068					52.8	0.456736		52.8	-7.31735
53.6	-0.368933		52.9	-3.13904					52.9	0.914968		52.9	-8.75029
53.7	-0.321688		53	-4.14623					53	1.22816		53	-6.69216
53.8	-0.203548		53.1	-1.5684					53.1	1.03831		53.1	-2.80087
53.9	-0.302895		53.2	-5.02201					53.2	0.849539		53.2	-1.91069
54	-0.16966		53.3	-3.9696					53.3	0.492209		53.3	-2.15646
54.1	0.367011		53.4	-0.580381					53.4	0.435375		53.4	-2.50716
54.2	0.503122		53.5	-3.73397					53.5	0.598647		53.5	-3.08341
54.3	0.10079		53.6	-2.65032					53.6	0.717878		53.6	-4.40403
			53.7	-0.503623					53.7	1.11868		53.7	-2.91879
			53.8	-3.32742					53.8	1.58943		53.8	-1.66382
			53.9	0.298027					53.9	1.51595		53.9	-2.44335
			54	-3.18195					54	1.04469		54	-4.23197
			54.1	-2.77687					54.1	0.346903		54.1	-4.06785
			54.2	0.449765					54.2	0.558252		54.2	-1.59157
			54.3	-2.84209					54.3	0.334442		54.3	-1.91129
			54.4	-2.86326					54.4	-0.253115		54.4	-1.24025
			54.5	0.336343					54.5	-0.0679297		54.5	-2.45505
			54.6	-3.22985					54.6	0.226763		54.6	-2.25916
			54.7	0.44536					54.7	0.224747		54.7	-4.15529
			54.8	-1.96353					54.8	0.195199		54.8	-3.06724
			54.9	-3.06336					54.9	-0.104252		54.9	-4.31799
			55	0.149767					55	0.355416		55	-2.55216
			55.1	-2.02867					55.1	0.641857		55.1	-2.13239
			55.2	-1.74899					55.2	1.10374		55.2	0.0839373
			55.3	0.376035					55.3	1.36023		55.3	-1.02806
			55.4	-2.42716					55.4	1.8567		55.4	-1.25435
			55.5	-1.47854					55.5	1.95202		55.5	-0.667153
			55.6	-0.358853					55.6	1.57974		55.6	-0.0874731
			55.7	-3.11924					55.7	1.15998		55.7	0.706302
			55.8	1.30551					55.8	0.754051		55.8	0.154271
			55.9	-2.57365					55.9	0.389914		55.9	-0.133994
			56	-2.37112					56	0.16451		56	-0.319778
			56.1	0.472602					56.1	-0.0573869		56.1	0.371147
			56.2	-2.39108					56.2	0.378369		56.2	-2.25749
			56.3	-2.4551					56.3	0.841912		56.3	-2.61051
			56.4	-0.283184					56.4	0.616599		56.4	-1.06931
			56.5	-2.39651					56.5	1.06818		56.5	1.68515
			56.6	2.32535					56.6	0.901779		56.6	1.2929
			56.7	-1.89581					56.7	0.766587		56.7	-0.724112
			56.8	-2.06691					56.8	0.679313		56.8	0.495367
			56.9	1.1722					56.9	0.720192		56.9	1.8467
			57	-3.24202					57	1.02307		57	1.41233
			57.1	-2.11334					57.1	1.34701		57.1	-0.435962
			57.2	1.27121					57.2	1.13826		57.2	-0.425875
			57.3	-2.19246					57.3	1.4981		57.3	-4.05616
			57.4	-0.780875					57.4	1.03804		57.4	-3.91519
			57.5	0.0917542					57.5	0.922756		57.5	-1.6666
			57.6	-2.12957					57.6	0.861553		57.6	1.17124
			57.7	1.41151					57.7	0.675756		57.7	-0.27098
			57.8	-2.51992					57.8	0.82147		57.8	-1.23374
			57.9	-1.37107					57.9	0.493778		57.9	0.887203
			58	1.07681					58	0.910942		58	2.71788
			58.1	-3.33826					58.1	1.07627		58.1	0.02146
			58.2	-1.82328					58.2	1.17099		58.2	-2.857
			58.3	0.134973					58.3	1.35868		58.3	-2.05972
			58.4	-1.18433					58.4	1.65541		58.4	-0.642722
			58.5	1.15915					58.5	1.73057		58.5	0.562649
			58.6	-2.8352					58.6	1.235		58.6	-0.27325
			58.7	-1.04934					58.7	0.542676		58.7	-0.551077
			58.8	1.65386					58.8	0.0451192		58.8	-1.32799
			58.9	-2.29275					58.9	-0.246476		58.9	-2.77526
			59	-1.77337					59	-0.259098		59	-1.08981
			59.1	0.922735					59.1	-0.260614		59.1	0.99071
			59.2	-1.96844					59.2	0.150741		59.2	0.105644
			59.3	-1.61135					59.3	0.876053		59.3	-0.377733
			59.4	-0.529588					59.4	0.969102		59.4	0.952648
			59.5	-1.83677					59.5	1.06386		59.5	2.03829
			59.6	1.35448					59.6	0.722447		59.6	1.20698
			59.7	-2.11345					59.7	0.611308		59.7	0.3814
			59.8	-1.84589					59.8	0.52461		59.8	0.752887
			59.9	0.760587					59.9	0.114827		59.9	3.01515
			60	-1.74335					60	0.0126714		60	2.20073
			60.1	-0.877036					60.1	0.431926		60.1	1.02418
			60.2	0.307291					60.2	0.870186		60.2	-0.746317
			60.3	-2.76739					60.3	0.851579		60.3	-1.99186
			60.4	1.56056					60.4	0.796788		60.4	-0.586156
			60.5	-2.54014					60.5	0.894156		60.5	-0.165726
			60.6	-1.08488					60.6	0.906017		60.6	-0.0137633
			60.7	1.11687					60.7	0.980358		60.7	-0.395352
			60.8	-2.79468					60.8	0.993584		60.8	-0.465091
			60.9	-1.60251					60.9	1.07066		60.9	-1.25369
			61	1.60539					61	1.18724		61	1.27618
			61.1	-3.19622					61.1	0.71843		61.1	0.15551
			61.2	1.39981								61.2	-1.23331
			61.3	-2.0611								61.3	-1.122
			61.4	-1.50941								61.4	2.17026
			61.5	1.257								61.5	3.87803
			61.6	-2.72423								61.6	3.09212
			61.7	-1.73616								61.7	1.34038
			61.8	0.879093								61.8	1.0349
			61.9	-1.19368								61.9	0.457572
			62	-1.68813								62	-0.433042
			62.1	0.277758								62.1	-0.744112
			62.2	-3.0475								62.2	-0.981158
			62.3	2.0539								62.3	-0.505059
			62.4	-1.87797								62.4	0.721836
			62.5	-1.09517								62.5	0.836789
			62.6	1.80647								62.6	-0.580078
			62.7	-1.75864								62.7	-3.09541
			62.8	-1.69528								62.8	-2.83344
			62.9	0.762138								62.9	0.366005
			63	-2.36064								63	2.23578
			63.1	-0.799696								63.1	2.08092
			63.2	0.252989								63.2	1.13677
			63.3	-1.59903								63.3	0.867337
			63.4	1.477								63.4	-0.455342
			63.5	-2.13407								63.5	0.0505586
			63.6	-2.40857								63.6	1.3445
			63.7	1.02295								63.7	1.79262
			63.8	-2.76863								63.8	-0.810973
			63.9	-2.44518								63.9	-0.462575
			64	0.196631								64	1.38234
			64.1	-2.91953								64.1	0.830892
			64.2	-0.774049								64.2	0.22959
			64.3	0.708578								64.3	1.08645
			64.4	-2.54656								64.4	1.21655
			64.5	-1.10388								64.5	-1.20437
			64.6	0.984661								64.6	-1.89611
			64.7	-1.78943								64.7	-0.417269
			64.8	1.19861								64.8	0.488132
			64.9	-2.04533								64.9	-0.806198
			65	-2.05688								65	0.0927905
			65.1	0.581951								65.1	2.29066
			65.2	-1.8371								65.2	0.924816
			65.3	-1.6546								65.3	1.26883
			65.4	0.792774								65.4	1.17731
			65.5	-1.38459								65.5	1.5529
			65.6	1.141								65.6	0.0470821
			65.7	-2.83086								65.7	0.732841
			65.8	-1.39609								65.8	0.878218
			65.9	1.65304								65.9	1.56716
			66	-2.21934								66	1.10591
			66.1	-1.10301								66.1	0.433192
			66.2	0.43507								66.2	-0.297761
			66.3	-2.99992								66.3	-0.666174
			66.4	2.30124								66.4	-0.221303
			66.5	-1.53409								66.5	-0.508824
			66.6	-1.5616								66.6	0.702172
			66.7	1.82275								66.7	1.08751
			66.8	-2.96245								66.8	0.835461
			66.9	-1.41537								66.9	0.211014
			67	0.497754								67	0.579012
			67.1	-1.85185								67.1	-0.552952
			67.2	0.285843								67.2	0.711789
			67.3	-1.62424								67.3	2.37812
			67.4	-2.12246								67.4	2.15949
			67.5	1.52249								67.5	1.09395
			67.6	-2.03098								67.6	1.89313
			67.7	-0.670431								67.7	1.80997
			67.8	0.564456								67.8	1.32577
			67.9	-2.02063								67.9	-0.615263
			68	-1.38979								68	0.304769
			68.1	0.699752								68.1	1.0455
			68.2	-1.44759								68.2	3.48458
			68.3	1.06569								68.3	3.22502
			68.4	-2.56767								68.4	2.16446
			68.5	-1.93852								68.5	0.406812
			68.6	1.32176								68.6	1.40819
			68.7	-2.63093								68.7	1.49236
			68.8	-0.995278								68.8	0.479891
			68.9	0.661202								68.9	-1.35467
			69	-1.78616								69	-2.1955
			69.1	2.44512								69.1	-0.726502
			69.2	-2.13477								69.2	-0.448379
			69.3	-2.14791								69.3	0.362468
			69.4	1.86335								69.4	1.05354
			69.5	-1.4457								69.5	-0.0347379
			69.6	-0.925628								69.6	-1.18855
			69.7	1.51569								69.7	-1.21035
			69.8	-1.46738								69.8	-1.2104
			69.9	1.22703								69.9	-1.28593
			70	-2.17321								70	1.33231
			70.1	-2.03992
			70.2	1.86089
			70.3	-1.6948
			70.4	-0.956265
			70.5	1.17652
			70.6	-2.02606
			70.7	-0.050193
			70.8	1.30818
			70.9	-0.980509
			71	2.06136
