# Supplementary material for: Ligand-specific activation trajectories dictate GPCR signalling in cells
Source: Nature. 2026 Jan 14;650(8103):1053–62. doi: 10.1038/s41586-025-09963-3 (PMC12935549; doi:10.1038/s41586-025-09963-3)
Supplement: Supplementary file 18 — Source Data Extended Data Fig. 7 [file 41586_2025_9963_MOESM18_ESM.xlsx]

## Sheet: Ext Data Fig 7
b)	Time (s)	M2R175	M2R175-Y426A		c)	M2R175	M2R175-Y426A		Table Analyzed				Ext Data Fig 7: 175 vs 175 Y426A deltaF/F					d)		M2R175					M2R175-Y426A
	0.1	-0.246096	-0.251404			14.1528	0.134928												ACh (log M)	Mean	SEM	N		ACh (log M)	Mean	SEM	N
	0.2	0.323762	0.914197			10.0371	-0.482615		Column B				M2R175						-11.5	-5.55556e-09	2.63633	9		-11.5	-1.26094	0.43292	9
	0.3	0.294887	-0.0272501			16.1702	0.0164924		vs.				vs.						-9.5	-0.602779	3.58393	9		-8.5	-1.71342	0.946486	9
	0.4	-0.085534	0.891782			12.8756	-0.273951		Column A				M2R175-Y426A						-8.5	28.4625	3.57481	9		-7.5	-0.561731	0.867452	9
	0.5	-0.236753	1.40734			12.2413	0.7541												-7.5	78.5732	1.53461	9		-6.5	0.198144	0.836707	9
	0.6	-0.340484	0.0624116			7.48521	1.34765		Unpaired t test with Welch's correction										-6.5	98.5591	3.12525	8		-5.5	7.83538	1.2099	9
	0.7	0.0494635	-0.116912			11.912	0.928494		P value				<0.0001						-5.5	106.78	4.79428	7		-4.5	33.7465	1.63896	9
	0.8	0.291539	0.846951			12.7304	0.983779		P value summary				****						-4.5	101.604	4.49083	7		-3.5	71.0239	1.86831	9
	0.9	-0.0840626	-0.879036			7.42565	0.66625		Significantly different (P < 0.05)?				Yes						-3.5	100	1.68581	9		-2.5	90.6683	2.06132	9
	1	0.0332785	-1.21527			8.56359	0.598312		One- or two-tailed P value?				Two-tailed
	1.1	0.388944	-1.23768			7.43434	-0.0721849		Welch-corrected t, df				t=17.91, df=49.55
	1.2	0.288192	-1.34976			6.79936	0.341726												log(agonist) vs. response -- Variable slope (four parameters)					log(agonist) vs. response -- Variable slope (four parameters)
	1.3	0.00307883	-0.475558			9.41738			How large is the effect?										Best-fit values					Best-fit values
	1.4	0.315596	-1.2601			19.6909			Mean of column A				0.4119						Bottom		-2.117			Bottom		-1.478
	1.5	0.236179	-1.19285			12.7737			Mean of column B				10.43						Top		102.3			Top		96.91
	1.6	0.473326	-1.37217			11.8816			Difference between means (B - A) ± SEM				10.02 ± 0.5594						LogEC50		-8.074			LogEC50		-4.136
	1.7	-0.28906	-0.0496655			18.8686			95% confidence interval				8.898 to 11.15						HillSlope		0.9536			HillSlope		0.7105
	1.8	0.172911	-1.64116			12.2853			R squared (eta squared)				0.8663						EC50		8.44e-09			EC50		7.309e-05
	1.9	0.38041	0.914197			12.8288													Span		104.5			Span		98.39
	2	0.0770884	-0.206573			13.3555			F test to compare variances										95% CI (profile likelihood)					95% CI (profile likelihood)
	2.1	0.121781	-0.318651			10.9919			F, DFn, Dfd				40.50, 43, 11						Bottom		-7.319 to 2.877			Bottom		-2.905 to -0.08491
	2.2	0.466705	0.0399961			6.4671			P value				<0.0001						Top		98.76 to 106.0			Top		92.43 to 102.3
	2.3	0.155917	0.129658			5.40375			P value summary				****						LogEC50		-8.201 to -7.944			LogEC50		-4.230 to -4.030
	2.4	0.307614	0.869366			9.55053			Significantly different (P < 0.05)?				Yes						HillSlope		0.7793 to 1.173			HillSlope		0.6261 to 0.8058
	2.5	0.177215	0.26415			8.11366													EC50		6.298e-009 to 1.137e-008			EC50		5.888e-005 to 9.328e-005
	2.6	0.271014	1.00386			7.23881			Data analyzed										Goodness of Fit					Goodness of Fit
	2.7	0.413847	0.712459			9.22206			Sample size, column A				12						Degrees of Freedom		63			Degrees of Freedom		68
	2.8	0.488261	-0.430728			7.23478			Sample size, column B				44						R squared		0.9602			R squared		0.9879
	2.9	-0.22101	0.600382			6.88315													Sum of Squares		5423			Sum of Squares		1045
	3	0.614724	1.25043			13.0534													Sy.x		9.278			Sy.x		3.92
	3.1	0.586364	0.577966			12.2435
	3.2	0.233752	-0.408312			11.3263													Number of points					Number of points
	3.3	0.566464	0.174489			3.08939													# of X values		72			# of X values		144
	3.4	0.547704	-0.677297			4.50299													# Y values analyzed		67			# Y values analyzed		72
	3.5	0.194797	0.555551			5.84007
	3.6	-0.242197	0.667628			10.5458
	3.7	0.118728	1.34009			13.9351
	3.8	0.812623	-0.453143			13.5718
	3.9	0.656768	0.308981			8.43736
	4	1.19154	-0.408312			7.85785
	4.1	0.684025	-0.161743			8.00465
	4.2	0.118323	1.76598			13.0534
	4.3	0.56444	-0.744543			12.2435
	4.4	0.518387	-0.475558			11.3263
	4.5	0.326999	0.219319
	4.6	0.20083	0.219319
	4.7	0.616196	0.488304
	4.8	0.492049	-1.03594
	4.9	0.978556	-0.453143
	5	3.21547	-0.27382
	5.1	4.95764	0.981444
	5.2	5.22598	1.13835
	5.3	6.36654	0.533135
	5.4	6.53074	0.959028
	5.5	7.98997	0.690043
	5.6	8.23487	0.51072
	5.7	8.35424	1.85564
	5.8	9.10316	1.02627
	5.9	9.28609	-0.385897
	6	9.45706	1.34009
	6.1	9.80489	0.757289
	6.2	9.94942	0.084827
	6.3	10.1159	0.084827
	6.4	10.5901	0.622797
	6.5	10.1656	1.58666
	6.6	10.5657	0.600382
	6.7	10.2319	-0.0720809
	6.8	10.2604	0.0624116
	6.9	9.93481	-0.228989
	7	10.0614	0.398643
	7.1	10.3753	0.196904
	7.2	9.89954	-0.632466
	7.3	10.4634	0.712459
	7.4	10.1886	0.376227
	7.5	9.90851	1.42975
	7.6	10.5745	2.05738
	7.7	10.1222	0.914197
	7.8	10.8465	1.45217
	7.9	10.6958	2.0798
	8	10.0284	0.0624116
	8.1	10.7349	1.51941
	8.2	10.0296	1.36251
	8.3	10.234	1.7884
	8.4	10.6895	0.152073
	8.5	10.1941	0.443474
	8.6	10.1873	0.690043
	8.7	10.1955	0.846951
	8.8	10.3188	1.2056
	8.9	10.0743	1.40734
	9	10.5657	0.219319
	9.1	9.84959	1.27284
	9.2	10.0543	1.45217
	9.3	10.2454	0.331397
	9.4	9.85345	0.577966
	9.5	10.0181	1.58666
	9.6	10.3859	0.891782
	9.7	10.1248	0.443474
	9.8	9.77101	-0.587635
	9.9	9.97461	0.667628
	10	10.1293	0.869366
	10.1	9.8924	2.48328
	10.2	9.85407	0.869366
	10.3	9.91355	0.0175807
	10.4	10.1668	0.421058
	10.5	9.96476	1.56424
	10.6	9.97108	1.56424
	10.7	10.0459	1.25043
	10.8	9.7819	0.0175807
	10.9	9.71709	0.577966
	11	9.73603	-0.475558
	11.1	9.59537	-0.341066
	11.2	9.71157	1.74357
	11.3	9.9023	0.555551
	11.4	9.89969	0.353812
	11.5	10.4619	-0.139327
	11.6	9.87217	0.308981
	11.7	9.71672	0.914197
	11.8	9.63973	0.398643
	11.9	9.90634	1.11594
	12	9.88942	-0.206573
	12.1	9.56403	1.02627
	12.2	9.17835	1.27284
	12.3	9.60475	-0.0720809
	12.4	9.69947	0.421058
	12.5	9.85209	0.219319
	12.6	9.60828	0.129658
	12.7	9.78507	0.891782
	12.8	9.47465	-2.11188
	12.9	9.64006	0.376227
	13	9.59471	2.01255
	13.1	9.39265	0.0175807
	13.2	9.86437	0.846951
	13.3	9.27829	0.645212
	13.4	9.28344	-0.610051
	13.5	9.21043	-0.699713
	13.6	9.4464	-0.116912
	13.7	9.57764	-0.296235
	13.8	9.40538	-0.0720809
	13.9	9.51319	1.83323
	14	9.30069	0.936613
	14.1	9.04585	-0.677297
	14.2	9.26542	0.577966
	14.3	8.96217	0.398643
	14.4	9.28421	0.376227
	14.5	9.52037	-0.184158
	14.6	8.89246	-0.184158
	14.7	8.70494	0.398643
	14.8	8.75279	0.645212
	14.9	9.15186	-0.475558
	15	9.16794	1.11594
	15.1	9.12314	0.129658
	15.2	8.91012	1.34009
	15.3	9.11214	1.16077
	15.4	8.43193	0.734874
	15.5	9.0503	0.981444
	15.6	9.64462	1.00386
	15.7	9.14315	-0.27382
	15.8	8.86054	1.34009
	15.9	8.94955	0.622797
	16	9.16639	0.0624116
	16.1	8.86752	1.16077
	16.2	8.76596	-0.251404
	16.3	8.8214	-0.0048347
	16.4	9.43709	0.936613
	16.5	8.17988	0.712459
	16.6	8.90707	0.51072
	16.7	8.27725	1.38492
	16.8	8.96629	-1.28251
	16.9	8.39672	0.488304
	17	8.37583	-0.453143
	17.1	7.85471	-0.699713
	17.2	7.85019	1.29526
	17.3	8.00597	0.376227
	17.4	7.58703	0.577966
	17.5	7.42323	-0.475558
	17.6	7.53197	-0.789374
	17.7	6.87416	-0.453143
	17.8	7.0032	0.421058
	17.9	6.94968	0.869366
	18	6.94787	1.92289
	18.1	6.73835	1.85564
	18.2	6.22852	0.196904
	18.3	5.93661	1.22801
	18.4	5.98295	0.129658
	18.5	5.75221	-0.318651
	18.6	5.79495	1.58666
	18.7	5.38908	0.936613
	18.8	5.17124	-0.0048347
	18.9	5.06574	0.443474
	19	5.00369	-0.744543
	19.1	4.07916	0.846951
	19.2	4.25219	1.90048
	19.3	4.07585	0.376227
	19.4	4.538	1.16077
	19.5	4.04682	0.219319
	19.6	3.65677	1.04869
	19.7	3.16787	0.846951
	19.8	3.50264	1.16077
	19.9	3.19498	0.869366
	20	3.26737	-0.0496655
	20.1	2.799	0.421058
	20.2	2.7837	0.690043
	20.3	2.76295	0.533135
	20.4	2.23271	-0.341066
	20.5	2.79113	0.376227
	20.6	2.1882	-0.0496655
	20.7	2.26905	0.959028
	20.8	1.34459	0.443474
	20.9	1.78883	0.241735
	21	1.92012	1.11594
	21.1	1.60955	0.488304
	21.2	1.56478	1.45217
	21.3	1.54599	0.577966
	21.4	0.955786	-0.206573
	21.5	1.54293	0.331397
	21.6	1.39598	0.622797
	21.7	1.04742	0.308981
	21.8	0.864304	1.11594
	21.9	0.721398	-0.27382
	22	0.69907	-0.228989
	22.1	1.10815	0.734874
	22.2	1.01144	-0.161743
	22.3	0.890531	-0.0272501
	22.4	0.839659	1.67632
	22.5	0.869049	0.555551
	22.6	0.661587	1.47458
	22.7	0.542959	0.286566
	22.8	0.25505	-1.10319
	22.9	0.376327	-0.520389
	23	0.387987	2.32637
	23.1	0.203699	0.241735
	23.2	-0.163958	1.11594
	23.3	-0.174368	1.67632
	23.4	0.301913	1.58666
	23.5	-0.102271	1.22801
	23.6	-0.0909413	0.891782
	23.7	0.497236	-0.184158
	23.8	0.351608	1.69874
	23.9	0.222422	0.757289
	24	0.827778	0.308981
	24.1	0.450778	2.57294
	24.2	0.209695	3.73854
	24.3	0.701645	-0.0048347
	24.4	0.118728	3.06608
	24.5	-0.23782	0.891782
	24.6	0.486936	1.63149
	24.7	-0.251614	0.398643
	24.8	0.191487	1.09352
	24.9	0.153857	0.712459
	25	-0.0887342	1.63149
	25.1	-0.51451	1.00386
	25.2	-0.131109	2.01255
	25.3	-0.250621	1.76598
	25.4	-0.176538	1.74357
	25.5	0.301177	-0.0720809
	25.6	0.182769	1.42975
	25.7	-0.334305	0.0175807
	25.8	-0.348246	0.712459
	25.9	0.43165	0.219319
	26	-0.337358	0.779705
	26.1	0.385118	1.16077
	26.2	-0.0802739	1.25043
	26.3	-0.214021	0.891782
	26.4	-0.398272	1.04869
	26.5	-0.0179249	1.13835
	26.6	-0.102639	0.465889
	26.7	-0.580059	1.34009
	26.8	0.131749	0.26415
	26.9	-0.00501367	-0.610051
	27	-0.0518766	0.26415
	27.1	-0.270558	-0.901451
	27.2	-0.0583138	0.353812
	27.3	-0.10411	-1.73082
	27.4	0.236768	0.286566
	27.5	-0.531394	-0.722128
	27.6	0.0433942	0.286566
	27.7	-0.325955	-0.206573
	27.8	-0.0582402	-0.453143
	27.9	0.0485071	0.196904
	28	-0.427	-0.0272501
	28.1	0.0596895	1.63149
	28.2	-0.577962	0.869366
	28.3	-0.455435	0.914197
	28.4	0.0607195	0.981444
	28.5	-0.24731	0.152073
	28.6	0.118728	1.18318
	28.7	0.443494	0.0624116
	28.8	-0.676323	0.981444
	28.9	-0.22318	0.80212
	29	-0.408498	0.174489
	29.1	-0.0871525	0.286566
	29.2	-0.274163	0.734874
	29.3	-0.0336317	-0.968698
	29.4	-0.134788	-0.0048347
	29.5	0.0297473	-1.08077
	29.6	0.212159	0.488304
	29.7	0.215764	0.600382
	29.8	0.275318	-0.27382
	29.9	0.209989	0.622797
	30	-0.0408781	-0.722128
