# Supplementary material for: Ligand-specific activation trajectories dictate GPCR signalling in cells
Source: Nature. 2026 Jan 14;650(8103):1053–62. doi: 10.1038/s41586-025-09963-3 (PMC12935549; doi:10.1038/s41586-025-09963-3)
Supplement: Supplementary file 19 — Source Data Extended Data Fig. 8 [file 41586_2025_9963_MOESM19_ESM.xlsx]

## Sheet: Ext Data Fig 8
c)		Ixo			d)		ACh			e)		Arec			f)		Pilo
	Time (s)	+PTX	-PTX			Time (s)	+PTX	-PTX			Time (s)	+PTX	-PTX			Time (s)	+PTX	-PTX
	0	-1.59669	-1.60172			0	0.553027	0.372301			0	-0.459544	-2.28059			0	-0.950398	-1.70298
	0.1	-0.970089				0.1	1.13202	1.6833			0.1	-0.958735	-0.224021			0.1	-1.21814	0.417533
	0.2	0.245604				0.2	1.08681	-1.02602			0.2	0.191439	-0.0724876			0.2	0.00678361	0.82557
	0.3	0.515504	1.23735			0.3	0.234389	-0.587829			0.3	0.66717	2.01267			0.3	-1.0174	1.28268
	0.4	0.66074				0.4	1.55673	0.17896			0.4	0.123277	1.92291			0.4	0.990546	0.282001
	0.5	0.208726				0.5	1.21458	0.0323688			0.5	-1.3979	1.52668			0.5	0.751873	-0.359685
	0.6	-0.856104	-0.59392			0.6	-0.885941	-0.285773			0.6	0.27039	0.229885			0.6	-0.224275	-0.345931
	0.7	0.0270415				0.7	-0.0864845	0.0578043			0.7		0.162407			0.7	2.1511	0.796946
	0.8	1.03723				0.8	-1.59733	-2.02188			0.8	0.717882	-1.33826			0.8	0.405494	-0.106249
	0.9	1.00708	0.958283			0.9	-3.5299	1.59677			0.9	0.097109	-0.679843			0.9	-0.895575	-0.497034
	1	2.31699				1	-3.12304	-1.11017			1		1.25958			1	-0.825801	-0.250008
	1.1	2.53029				1.1	-2.9123	-0.0452054			1.1	-1.54138	-0.143509			1.1	0.493542	0.808447
	1.2	2.4131	-3.88733			1.2	-1.2178	-0.00297144			1.2	0.030495	-0.900676			1.2	0.418092	0.31397
	1.3	1.88111				1.3	0.232535	0.633629			1.3		1.81986			1.3	0.583114	-0.745329
	1.4	1.10572				1.4	-0.149778	0.788381			1.4	0.520551	1.67698			1.4	-1.43383	-1.38213
	1.5	1.40389	1.32085			1.5	0.712336	-1.57339			1.5	0.144941	1.07798			1.5	0.526076	-0.289706
	1.6	-0.187896				1.6	0.192846	-0.53569			1.6		-1.53037			1.6	-0.358562	-0.220114
	1.7	0.134037				1.7	1.30216	-0.492664			1.7	-1.2737	1.30714			1.7	-0.48842	0.473113
	1.8	0.491678	-2.81689			1.8	2.91922	-0.436722			1.8	0.244012	-0.0041208			1.8	2.04228	0.425175
	1.9	0.762926				1.9	2.79381	1.61745			1.9		-0.499253			1.9	-0.4707	0.534792
	2	0.503341				2	2.06108	1.31611			2	0.630473	-0.902366			2	-2.81963	-0.282344
	2.1	1.16734	-0.369593			2.1	0.825293	0.360178			2.1		1.85949			2.1	1.61796	-0.373163
	2.2	-0.0657567				2.2	-2.68129	-0.103208			2.2	0.00450775	-0.0434244			2.2	-0.262484	0.438186
	2.3	-0.626324				2.3	-3.01657	-0.627765			2.3	-0.12664	-1.99138			2.3	0.609833	1.46297
	2.4	-2.55243	-2.0963			2.4	-3.9728	0.591474			2.4		-0.718037			2.4	-2.15234	0.211428
	2.5	-0.159041				2.5	-2.5259	0.191162			2.5	0.171742	-1.43037			2.5	2.1133	0.0723895
	2.6	-0.798823	0.590229			2.6	-2.48175	-0.121512			2.6	1.08867	0.0501716			2.6	0.250163	0.868101
	2.7	-0.829158	-1.31622			2.7	0.455629	-0.361445			2.7		1.53288			2.7	1.07195	1.7572
	2.8	-0.476936				2.8	0.64319	-0.171511			2.8	0.389165	0.812926			2.8	0.901944	1.03761
	2.9	1.39425	1.11551			2.9	0.226322	0.58561			2.9		-0.974296			2.9	-1.62765	-0.0126801
	3	1.09957	-2.73166			3	-1.70717	-1.11556			3	1.18553	-0.421649			3	0.573561	-0.196892
	3.1	0.312865				3.1	-2.35401	-0.984496			3.1		0.101242			3.1	-3.99845	0.740339
	3.2	-0.184265	-1.07633			3.2	-1.97759	-0.0505936			3.2	-0.151728	0.220389			3.2	1.2821	0.432812
	3.3	0.635369	-1.52174			3.3	0.332976	1.00367			3.3	1.19408	-0.49646			3.3	-1.0779	-0.395313
	3.4	-1.05407	2.05013			3.4	1.24485	-0.78743			3.4	0.288406	1.03171			3.4	0.616201	-0.124048
	3.5	-1.68897	-2.54803			3.5	4.42824	-0.909457			3.5	1.3501	0.497097			3.5	1.47274	1.23278
	3.6	-1.43951				3.6	3.56431	0.962943			3.6		-0.174313			3.6	0.313846	0.977665
	3.7	-1.18826	1.32684			3.7	2.10121	0.0711956			3.7	-0.0271684	-0.794772			3.7	-0.151316	0.421292
	3.8	-0.811928				3.8	0.011761	-0.0991667			3.8		0.887863			3.8	0.000276882	0.420936
	3.9	-0.822428	-3.23412			3.9	0.118605	1.29043			3.9	1.01485	0.482177			3.9	2.87888	1.78068
	4	-0.682929	0.537279			4	0.732922	-2.1283			4	-0.0244502	0.51131			4	-1.50305	-0.618147
	4.1	-0.23961				4.1	1.62648	-1.08846			4.1		2.37138			4.1	-0.474576	1.38569
	4.2	0.779282	-0.420987			4.2	0.182422	0.728239			4.2	1.74335	0.63955			4.2	-2.16342	2.76551
	4.3	0.978384	3.00011			4.3	0.269922	0.374044			4.3	0.692582	0.238272			4.3	1.56909	3.56775
	4.4	0.868392	-2.21046			4.4	1.55014	-0.0994836			4.4	1.47888	0.419492			4.4	-2.05654	0.111604
	4.5	0.655405	1.18122			4.5	-0.189582	1.19717			4.5	0.139749	1.8119			4.5	1.17052	-0.387596
	4.6	0.254811	-2.43978			4.6	0.0791205	-1.15216			4.6	1.28735	0.830683			4.6	0.622708	-1.15945
	4.7	0.427486				4.7	-0.912935	-1.26413			4.7		0.395411			4.7	1.68981	0.500564
	4.8	0.279014	-0.256338			4.8	-3.12593	-1.28005			4.8	0.0142685	2.99581			4.8	0.883254	0.878777
	4.9	0.809477	-1.60101			4.9	-2.85126	-3.2481			4.9	1.42579	3.13541			4.9	-0.131381	1.39511
	5	1.1581	2.79937			5	-4.08931	-2.55127			5	0.222553	-0.301619			5	0.565947	1.03927
	5.1	1.00941	-3.551			5.1	-3.27288	-2.7237			5.1	1.59861	-1.44378			5.1	-0.0923402	1.16918
	5.2	1.42244				5.2	-1.70196	-2.26792			5.2		0.162199			5.2	0.835353	0.452616
	5.3	1.62185	2.5607			5.3	-2.70798	-4.74903			5.3	0.476391	-1.38129			5.3	0.035164	-0.191625
	5.4	0.716766	-1.84043			5.4	-3.34816	-3.04865			5.4	1.92591	-0.337751			5.4	1.23559	-0.455985
	5.5	1.04557	1.61535			5.5	-4.2581	-3.9034			5.5	0.519861	1.7953			5.5	0.0119059	0.742387
	5.6	1.18334	-3.00401			5.6	-3.84549	-5.97017			5.6	1.57295	0.602844			5.6	0.440381	0.971943
	5.7	0.506308				5.7	-1.95571	-4.66131			5.7		-1.02185			5.7	0.676285	1.06242
	5.8	-0.0207624	2.05195			5.8	-0.548066	-5.21249			5.8	0.200067	0.155843			5.8	1.21441	1.01033
	5.9	0.273794	-2.11475			5.9	3.04947	-4.42122			5.9	1.14509	2.02841			5.9	0.849474	1.85399
	6	-0.30721	0.170643			6	1.94645	-6.53308			6	-0.0398437	1.60592			6	-0.42626	1.51524
	6.1	-1.09725				6.1	0.249565	-4.67011			6.1		0.897164			6.1	0.513201	0.270845
	6.2	-1.41842	-2.69641			6.2	-1.31626	-5.56288			6.2	0.910262	1.37969			6.2	-0.612602	-0.395367
	6.3	-1.11825	2.28524			6.3	-1.01349	-4.14586			6.3	0.0681949	2.74025			6.3	0.0405632	0.805982
	6.4	-0.812386	-0.494775			6.4	-0.197289	-7.01263			6.4	1.12782	1.47803			6.4	-0.229812	0.758894
	6.5	-1.1177	-0.037016			6.5	-2.18414	-5.16416			6.5	-0.273622	0.991965			6.5	1.56452	0.958849
	6.6	0.306429				6.6	-0.723985	-5.56043			6.6		2.88187			6.6	-0.0526076	1.35352
	6.7	0.789649	-4.1752			6.7	0.17344	-6.17841			6.7	0.476803	3.45585			6.7	-1.54362	2.24017
	6.8	0.794248	-0.381257			6.8	-1.61026	-5.67746			6.8	-0.239389	2.39914			6.8	-2.11593	0.579158
	6.9	1.06227	-1.72736			6.9	-2.20468	-6.27484			6.9	0.823357	1.13361			6.9	-1.03305	-1.4675
	7	0.469418	-0.298488			7	-1.62251	-5.78348			7	-0.298936	-0.634764			7	1.99134	-2.83551
	7.1	0.29071				7.1	-0.334635	-8.07751			7.1		0.239861			7.1	1.03111	-2.52292
	7.2	-0.199322	-1.95586			7.2	1.35855	-8.47505			7.2	0.716367	0.767764			7.2	0.165437	-3.08734
	7.3	-0.96404	0.300413			7.3	0.852881	-6.24909			7.3	-0.0204116	1.5978			7.3	-2.40126	-3.89313
	7.4	-0.933969				7.4	0.289433	-6.54385			7.4		1.19117			7.4	-1.14712	-4.06921
	7.5	-0.834205	-1.30374			7.5	-1.24651	-7.01992			7.5	0.959291	0.679925			7.5	-1.36849	-4.19584
	7.6	-0.953047				7.6	-1.8157	-7.00866			7.6		-0.0779925			7.6	-2.44708	-5.13122
	7.7	-0.98596	1.03292			7.7	-2.81783	-7.21033			7.7	0.337944	0.0220858			7.7	-1.58584	-6.66166
	7.8	-1.81683	-1.53944			7.8	-1.53403	-6.80558			7.8	1.39017	-0.271888			7.8	-2.98853	-6.96218
	7.9	-1.12259	0.764206			7.9	-2.49166	-6.07857			7.9	-0.0917376	1.22695			7.9	-1.51275	-6.25983
	8	-1.03793				8	-1.29415	-8.07759			8		2.74411			8	-0.0490081	-7.30453
	8.1	-1.06021	-2.6792			8.1	-2.29621	-4.79768			8.1	0.442949	0.131705			8.1	-1.70809	-7.12106
	8.2	-0.35125	0.379303			8.2	-4.92049	-8.02402			8.2	-0.64139	-0.267246			8.2	-1.14809	-6.22995
	8.3	1.73385	-3.53239			8.3	-3.2359	-8.09177			8.3	0.684179	0.208446			8.3	-2.43103	-5.88026
	8.4	2.4142				8.4	-1.04063	-8.1718			8.4		0.117258			8.4	-3.43957	-6.87791
	8.5	2.46998	1.85358			8.5	-0.705324	-7.58108			8.5	-0.158653	-0.129618			8.5	-3.2416	-7.05956
	8.6	1.79393	-2.20507			8.6	0.562478	-5.95519			8.6	1.11083	0.679061			8.6	-2.89702	-6.64332
	8.7	0.522326	0.802254			8.7	-1.54715	-8.07751			8.7	-0.330798	0.985476			8.7	-2.75165	-6.62316
	8.8	-0.150698	-3.14808			8.8	-2.46231	-7.39455			8.8	0.845462	-0.49064			8.8	-4.58821	-8.10669
	8.9	-0.245314				8.9	-4.9728	-6.60201			8.9		0.0139577			8.9	-3.33754	-8.82579
	9	0.659804	1.99099			9	-5.08704	-7.64812			9	0.10435	0.0353594			9	-1.77924	-8.47637
	9.1	1.01317				9.1	-2.58441	-7.57506			9.1		1.59584			9.1	-2.36416	-6.74033
	9.2	1.09947	-1.38554			9.2	-0.715279	-7.45287			9.2	1.29642	0.877093			9.2	-2.36333	-6.56895
	9.3	2.63617				9.3	0.675653	-6.65106			9.3		1.37013			9.3	-3.76144	-7.47878
	9.4	2.62431	0.530676			9.4	0.947126	-8.07751			9.4	0.206368	1.85201			9.4	-2.28677	-8.33071
	9.5	1.28044				9.5	0.0256674	-6.71952			9.5		0.62511			9.5	-3.40177	-7.65152
	9.6	1.03407	-1.1889			9.6	0.494288	-5.97793			9.6	1.17888	-0.155213			9.6	-2.14473	-8.41547
	9.7	2.03223				9.7	-0.455233	-7.61563			9.7		-0.470884			9.7	-2.45927	-8.27994
	9.8	2.33682	0.322544			9.8	0.894092	-8.70563			9.8	0.292264	-0.515831			9.8	-1.36544	-7.95305
	9.9	0.559924	-0.243647			9.9	-1.4875	-7.7169			9.9	1.27931	0.0786104			9.9	-3.27441	-7.42466
	10	-0.730598				10	-2.74975	-7.26579			10		1.39254			10	-4.56288	-8.60086
	10.1	0.194099	1.69126			10.1	-2.09697	-7.89605			10.1	0.41424	1.2125			10.1	-6.10137	-7.40624
	10.2	-1.67636	-2.17084			10.2	-2.21072	-8.02014			10.2	1.08794	1.83927			10.2	-6.47586
	10.3	-2.78926	1.25825			10.3	-1.53644	-7.25002			10.3	0.0190542	0.272367			10.3	-2.61889	-8.5899
	10.4	-3.11077				10.4	-1.35375	-7.06389			10.4		0.494852			10.4	-2.82627	-7.40577
	10.5	-1.79231	-2.38791			10.5	-1.55526	-8.81696			10.5	1.11872	-0.132789			10.5	-2.89397
	10.6	-0.397899	1.87949			10.6	-0.866731	-7.30153			10.6	0.380119	-0.111716			10.6	-4.90164	-8.28815
	10.7	0.383632				10.7	-1.32196	-8.07751			10.7		-0.722533			10.7	-2.4349	-8.91496
	10.8	0.497647	-1.30695			10.8	-0.452611	-8.07751			10.8	1.00984	1.51545			10.8	-3.36218
	10.9	2.81022	-0.583411			10.9	1.34157	-8.43353			10.9	-0.364656	-0.0272376			10.9	-5.26021	-8.91397
	11	2.60653	-1.80395			11	2.83775	-7.6661			11	0.440317	-1.05503			11	-4.23173	-8.28577
	11.1	2.44507	0.511144			11.1	1.15812	-6.20249			11.1	-0.275536	-0.962845			11.1	-2.26974	-7.40624
	11.2	1.94795	-2.15816			11.2	0.481549	-7.83346			11.2	0.755291	-0.456791			11.2	-5.16219
	11.3	1.46949	0.988964			11.3	0.786203	-7.83987			11.3	-0.207557	0.217759			11.3	-3.63699	-8.31264
	11.4	0.312757	-1.6185			11.4	1.00502	-7.8459			11.4	0.882804	1.20224			11.4	-3.61954	-8.8445
	11.5	-0.301636	0.994218			11.5	2.07906	-6.20249			11.5	-0.368293	0.767335			11.5	-3.39084
	11.6	-0.0699858	-2.7035			11.6	1.68895	-7.8459			11.6	0.919355	-0.0656585			11.6	-5.60271	-8.68002
	11.7	1.66307	2.27808			11.7	2.8313	-8.07751			11.7	0.0280399	0.0287951			11.7	-3.35996	-7.94823
	11.8	1.38918	-1.78145			11.8	2.60723	-8.43353			11.8	1.34585	0.580288			11.8	-5.18157
	11.9	1.39356	1.20375			11.9	1.21356	-7.6661			11.9	-0.531701	0.497318			11.9	-5.88098
	12	1.5503	-4.1007			12	2.87022	-7.8459			12	0.155037	0.432961			12	-5.97622	-7.05894
	12.1	1.49691	0.703276			12.1	1.71901	-7.6661			12.1	-0.869871	0.15148			12.1	-5.80663	-8.07306
	12.2	-0.280416	-1.77155			12.2	0.310548	-7.8459			12.2	0.796682	-0.756332			12.2	-0.652473
	12.3	-1.41077	0.740059			12.3	-0.446223	-7.83346			12.3	0.362285	-1.23295			12.3	-6.51227
	12.4	-1.43651	0.166014			12.4	-1.83095	-7.83987			12.4	1.07312	0.783957			12.4	-5.67387	-8.75949
	12.5	-1.18004	-2.38274			12.5	-2.06238	-7.8459			12.5	-0.318754	2.01773			12.5	-4.95314
	12.6	-0.829189	-1.97365			12.6	-2.53136	-7.8459			12.6	0.548959	-1.65796			12.6	-3.86638	-8.70752
	12.7	-0.331696	-0.741414			12.7	-0.781399	-7.8459			12.7	0.15879	-2.59692			12.7	-5.42537	-7.64349
	12.8	0.31754	-1.4593			12.8	0.262359	-6.20249			12.8	1.23007	-2.21514			12.8	-3.2913
	12.9	0.480968	1.53302			12.9	1.81677	-7.8459			12.9	0.133602	-2.90835			12.9	-5.98038
	13	0.617434	-1.15064			13	0.92947	-8.07751			13	1.13175	-1.61444			13	-5.22712	-8.60765
	13.1	-0.0289931	1.75415			13.1	1.60784	-8.43353			13.1	-0.206024	-0.154298			13.1	-5.82795
	13.2	0.0523482	-3.12026			13.2	1.64323	-7.6661			13.2	0.391373	0.79177			13.2	-6.63617	-8.70291
	13.3	-0.0854709	-0.120661			13.3	0.949391	-7.8459			13.3	-0.886686	-2.21659			13.3	-7.30803	-7.59219
	13.4	-0.0565037	-2.52522			13.4	0.272032	-7.6661			13.4	0.330954	-2.28147			13.4	-4.77885
	13.5	-0.14412	0.470802			13.5	0.898524	-7.8459			13.5	-0.238555	-2.67819			13.5	-3.75148	-6.59985
	13.6	-0.238353	-0.754245			13.6	-0.229328	-7.83346			13.6	1.10758	-0.0861836			13.6	-6.35292
	13.7	0.0880157	0.711325			13.7	0.617567	-7.8459			13.7	-0.195894	-1.90019			13.7	-7.18149	-7.51593
	13.8	0.953327	-4.08954			13.8	-2.157	-7.83987			13.8	0.563375	-2.5498			13.8	-4.42859
	13.9	0.987075	0.844194			13.9	-2.61984	-7.8459			13.9	-0.618705	-4.02715			13.9	-6.04115	-6.59985
	14	1.08131	-3.1328			14	-1.3971	-6.20249			14	0.684991	-4.05026			14	-5.42675	-7.59219
	14.1	0.406676	1.0066			14.1	-1.64643	-7.83346			14.1	-0.0287729	-4.01579			14.1	-3.16504
	14.2	-0.0768649	-0.773457			14.2	-0.221969	-7.83987			14.2	1.38338	-2.52588			14.2	-3.67132
	14.3	0.137663	1.07186			14.3	0.8794	-7.8459			14.3	0.114774	-4.08203			14.3	-4.49601	-8.70291
	14.4	-0.606993	-1.91251			14.4	0.421156	-6.20249			14.4	0.527063	-2.09351			14.4	-6.64794
	14.5	-0.757592	0.354851			14.5	-0.0963774	-8.44628			14.5	-0.923345	-1.33856			14.5	-6.08407	-8.60765
	14.6	-0.089923	-1.80155			14.6	-0.0428744	-8.29098			14.6	-0.0763827	-1.12846			14.6	-6.78735	-7.9732
	14.7	1.31305	-0.22912			14.7	0.352582	-8.69945			14.7	-0.889969	-2.73104			14.7	-5.19043
	14.8	1.63933	-1.48967			14.8	0.138223	-6.95629			14.8	0.585166	-3.41803			14.8	-4.82993	-7.17916
	14.9	2.00293	1.2707			14.9	-0.58169	-8.46435			14.9	-0.311552	-3.23336			14.9	-5.07996	-7.71541
	15	2.2564	-1.60612			15	0.121725	-7.53069			15	0.813507	-2.2088			15	-4.85111	-7.27123
	15.1	1.54095	1.14196			15.1	0.365815	-7.55652			15.1	-0.482055	-1.53455			15.1	-3.82679	-8.52962
	15.2	1.2747	-2.12558			15.2	0.285734	-8.63257			15.2	0.600314	-2.5415			15.2	-6.09293	-9.26292
	15.3	0.905835	1.45953			15.3	-0.291721	-7.38814			15.3	-0.257241	-3.4096			15.3	-5.15762	-8.04411
	15.4	1.40278	-2.70621			15.4	1.92502	-9.16791			15.4	0.985343	-5.27834			15.4	-4.82176	-7.37664
	15.5	1.24383	0.233936			15.5	1.76444	-8.68503			15.5	-0.220257	-3.96117			15.5	-4.99108	-8.03601
	15.6	-0.0177741	-2.19189			15.6	-0.827878	-7.08973			15.6	0.627697	-3.09861			15.6	-4.38	-8.99627
	15.7	0.149477	0.519388			15.7	0.262523	-8.66823			15.7	0.0476264	-4.41095			15.7	-3.68904	-9.00622
	15.8	0.683252	-1.15518			15.8	0.927445	-9.03043			15.8	1.22036	-5.21549			15.8	-4.47289	-10.2396
	15.9	0.147433	0.556727			15.9	2.51108	-9.47915			15.9	-0.127212	-3.09144			15.9	-6.39612	-9.76374
	16	1.11718	-3.61564			16	2.80041	-8.54383			16	0.391452	-2.51438			16	-8.38081	-9.22875
	16.1	1.50568	0.984223			16.1	1.0084	-9.86251			16.1	-0.585706	-3.57308			16.1	-4.82509	-8.22479
	16.2	2.40514	-2.34904			16.2	2.10115	-7.36896			16.2	0.634235	-5.63706			16.2	-5.36293	-8.45933
	16.3	1.31788	0.388186			16.3	2.14501	-8.79921			16.3	-0.37408	-4.13111			16.3	-5.6459	-8.96216
	16.4	1.4737	-3.18977			16.4	0.893007	-8.80587			16.4	0.620169	-3.48713			16.4	-6.4155	-9.86795
	16.5	2.37691	0.85665			16.5	2.96589	-8.2596			16.5	-0.27616	-4.01843			16.5	-7.32852	-9.35522
	16.6	2.97556	-3.33253			16.6	2.82665	-8.40373			16.6	0.763586	-5.42152			16.6	-7.19284	-8.26087
	16.7	2.06336	0.882437			16.7	2.3029	-9.645			16.7	-0.340562	-3.39584			16.7	-4.13939	-9.28065
	16.8	0.869623	-1.04858			16.8	1.24467	-7.5066			16.8	0.957683	-4.95406			16.8	-6.1825	-10.2739
	16.9	0.327137	1.69449			16.9	0.602334	-8.61688			16.9	-0.0665272	-3.63274			16.9	-6.85034	-10.1348
	17	1.00691	-2.37299			17	0.372507	-7.20922			17	0.828818	-2.73338			17	-7.47873	-8.7932
	17.1	0.144842	-0.173542			17.1	-0.448513	-7.58362			17.1	-0.43145	-2.64026			17.1	-6.46063	-9.12819
	17.2	1.38783	-2.33509			17.2	-0.804672	-7.62094			17.2	0.83369	-3.69082			17.2	-8.56535	-8.88883
	17.3	2.34465	0.362316			17.3	1.20001	-6.56826			17.3	0.0860681	-2.15658			17.3	-7.61343	-8.92198
	17.4	0.939856				17.4	-0.303427	-6.85653			17.4		-3.77318			17.4	-4.56786	-10.0552
	17.5	0.062387				17.5	-0.796316	-7.49408			17.5		-3.43762			17.5	-3.56223	-9.63001
	17.6	-0.0663047				17.6	0.216618	-6.51921			17.6	1.43715	-3.20035			17.6	-5.78988	-8.96698
	17.7	-1.50428				17.7	-0.0551071	-7.14305			17.7		-1.89235			17.7	-4.90414	-8.65555
	17.8	-1.8824	-1.60172			17.8	-3.60538	-5.89877			17.8		-3.41108			17.8	-7.29654	-9.23221
	17.9	-2.45069				17.9	-2.75416	-6.10939			17.9	0.3095	-3.16572			17.9	-6.80839	-9.32151
	18	-1.38362				18	-0.853316	-6.10765			18		-3.9488			18	-5.63787	-9.20822
	18.1	-0.36162	1.23735			18.1	1.15016	-5.81343			18.1		-3.13651			18.1	-6.41065	-8.95066
	18.2	-1.28362				18.2	0.905225	-4.24016			18.2	1.21547	-3.32227			18.2	-6.97508	-8.50805
	18.3	-0.177055				18.3	3.2068	-4.78865			18.3		-0.642797			18.3	-4.98706	-9.4895
	18.4	-0.206051	-0.59392			18.4	2.36267	-4.95711			18.4		0.218749			18.4	-7.74993	-9.15114
	18.5	0.122284				18.5	0.785213	-3.82178			18.5	0.0483121	-0.658221			18.5	-4.73828	-8.01559
	18.6	0.252848				18.6	-0.484997	-3.49342			18.6		-0.999733			18.6	-6.40207	-6.33593
	18.7	1.46617	0.958283			18.7	0.165991	-3.90332			18.7		1.2717			18.7	-6.91845	-5.91806
	18.8	1.88621				18.8	0.375069	-1.9623			18.8	1.0852	-0.174205			18.8	-4.84115	-4.79001
	18.9	1.24756				18.9	-0.633742	-3.03067			18.9		-1.6783			18.9	-3.5841	-3.98033
	19	0.946142	-3.88733			19	0.400689	-3.63193			19		-2.04771			19	-3.77072	-3.86265
	19.1	1.31408				19.1	0.770832	-3.52163			19.1	-0.0126657	-2.24742			19.1	-3.97492	-3.88079
	19.2	1.57501				19.2	-0.599136	-2.06031			19.2		-1.59286			19.2	-4.99994	-3.47189
	19.3	2.67623	1.32085			19.3	1.03509	-1.77933			19.3		-1.50363			19.3	-5.4705	-3.10485
	19.4	2.2829				19.4	1.36743	-1.23647			19.4	1.21477	-0.266477			19.4	-5.78822	-2.70252
	19.5	3.37172				19.5	-1.51239	-1.82918			19.5		-0.540203			19.5	-6.12879	-3.27889
	19.6	3.40345	-2.81689			19.6	0.864473	-3.21188			19.6		-0.296139			19.6	-3.47501	-2.71255
	19.7	1.43539				19.7	1.24499	-0.521507			19.7	0.16649	0.27977			19.7	-3.66246	-2.06328
	19.8	1.32886				19.8	1.33873	-1.61103			19.8		1.10908			19.8	-3.71604	-1.12434
	19.9	0.848654	-0.369593			19.9	0.0281494	0.661996			19.9		-0.711914			19.9	-2.49443	-1.52434
	20	1.18198				20	-0.245372	-1.2257			20	1.07296	-1.39389			20	-4.52951	-1.65853
	20.1	0.596197				20.1	-0.913579	-1.20977			20.1		0.369721			20.1	-5.38107	-1.80553
	20.2	-0.855585	-2.0963			20.2	-1.49311	-1.78496			20.2	-0.0681774	-0.00751328			20.2	-1.93402	-1.93392
	20.3	-0.699061				20.3	-1.76136	-1.47609			20.3	1.08867	1.76831			20.3	-3.13887	-2.94577
	20.4	0.343148	0.590229			20.4	0.924127	-1.7722			20.4		2.9147			20.4	-4.24986	-3.08035
	20.5	-0.447338	-1.31622			20.5	2.56191	-0.607876			20.5	0.389165	0.429808			20.5	-3.84354	-2.28271
	20.6	0.645721				20.6	0.997017	-0.779586			20.6	1.18553	-0.897763			20.6	-3.75591	-0.660845
	20.7	1.20572	1.11551			20.7	1.24627	0.332365			20.7		0.00945545			20.7	-4.64996	-0.507269
	20.8	1.59141	-2.73166			20.8	0.774971	-1.67672			20.8	-0.151728	0.0127029			20.8	-0.249609	-1.00656
	20.9	1.52707				20.9	-0.101631	0.500033			20.9	1.19408	0.2705			20.9	-3.41243	-1.72586
	21	0.691053	-1.07633			21	1.09071	-1.40303			21	0.288406	2.0153			21	-2.61349	-0.824132
	21.1	1.31608	-1.52174			21.1	0.646538	-1.25486			21.1	1.3501	2.90924			21.1	-4.22924	-1.36831
	21.2	2.151	2.05013			21.2	-0.244471	-0.819997			21.2		0.804388			21.2	-4.57769	-0.538849
	21.3	1.72486	-2.54803			21.3	1.64178	-0.506372			21.3	-0.0271684	-1.63072			21.3	-1.96019	-0.173107
	21.4	2.73316				21.4	-0.600992	-0.846146			21.4		-2.35648			21.4	-2.62083	0.05208
	21.5	2.97464	1.32684			21.5	0.962112	-0.102812			21.5	1.01485	-0.452156			21.5	-2.69005	-0.910573
	21.6	1.9529				21.6	0.272321	-1.02411			21.6	-0.0244502	0.0786231			21.6	-1.39507	-1.4549
	21.7	1.0545	-3.23412			21.7	-1.29803	0.728873			21.7		1.46563			21.7	-2.10638	-1.1402
	21.8	1.54186	0.537279			21.8	-0.470486	-0.252097			21.8	1.74335	1.67143			21.8	-2.42244	-0.99814
	21.9	1.82362				21.9	-3.33319	-1.16088			21.9	0.692582	-0.881406			21.9	-3.62633	-0.00678087
	22	0.954893	-0.420987			22	-4.0336	-1.33671			22	1.47888	-0.381979			22	-0.452287	-0.760744
	22.1	0.24193	3.00011			22.1	-4.16269	-0.994163			22.1	0.139749	2.94075			22.1	-0.760457	-1.43378
	22.2	0.595364	-2.21046			22.2	-5.02625	-0.845195			22.2	1.28735	3.044			22.2	-0.292664	-1.46713
	22.3	1.27389	1.18122			22.3	-3.83591	-0.30162			22.3		1.25798			22.3	-6.19344	-0.127374
	22.4	1.72181	-2.43978			22.4	-3.05297	-0.904465			22.4	0.0142685	-0.0042343			22.4	-2.13213	-0.502387
	22.5	1.93223				22.5	-3.17676	0.332286			22.5	1.42579	1.13603			22.5	-4.96145	-0.659737
	22.6	2.94488	-0.256338			22.6	-1.25117	0.58561			22.6	0.222553	1.07174			22.6	-3.04653	-0.17832
	22.7	3.74806	-1.60101			22.7	-1.47998	-0.233079			22.7	1.59861	-0.0880312			22.7	-1.56078	-0.628166
	22.8	4.06391	2.79937			22.8	-2.16318	-0.0310218			22.8		0.292759			22.8	-1.80749	-1.24119
	22.9	3.91508	-3.551			22.9	-3.89935	-1.18481			22.9	0.476391	1.62953			22.9	-0.938354	-1.13652
	23	3.99179				23	-3.10002	0.573249			23	1.92591	0.581367			23	-0.722109	-0.460617
	23.1	3.89567	2.5607			23.1	-1.61406				23.1	0.519861	-0.766932			23.1	-4.09232	-0.137612
	23.2	2.1232	-1.84043			23.2	0.780107				23.2	1.57295	0.620538			23.2	-1.82576	-1.09875
	23.3	0.654993	1.61535			23.3	1.20567	0.332286			23.3		0.0194942			23.3	-3.39887	-1.31496
	23.4	-0.159475	-3.00401			23.4	0.460897	0.58561			23.4	0.200067	0.885984			23.4	-0.746059	-0.887156
	23.5	0.840409				23.5	1.0603	-0.233079			23.5	1.14509	2.05168			23.5	-1.61879	0.747941
	23.6	1.64284	2.05195			23.6	-1.11452	-0.0310218			23.6	-0.0398437	1.05989			23.6	-4.13344	0.00619177
	23.7	1.87929	-2.11475			23.7	-1.69789	-1.18481			23.7					23.7	-1.72816	-0.951612
	23.8	2.47289	0.170643			23.8	-2.23037	0.573249			23.8	0.910262				23.8	-1.3905	-1.44697
	23.9	1.83444				23.9	-1.04004				23.9	0.246362				23.9	-1.01187	-0.732637
	24	0.269192	-2.69641			24	-1.41932				24	0.312145				24	-2.92401	-1.22902
	24.1	0.634707	2.28524			24.1	-0.639274	0.372301								24.1	-2.63606	-0.740658
	24.2	1.36818	-0.494775			24.2	-1.0341	1.6833								24.2	0.302355	-0.0398167
	24.3	2.11281	-0.037016			24.3	-1.35365	-1.02602								24.3	-2.96845	0.476445
	24.4	0.519664				24.4	-1.56858	-0.587829								24.4	-1.91173	-0.169812
	24.5	-0.0322045	-4.1752			24.5	-1.06781	0.17896								24.5	-1.29332	-0.309204
	24.6	0.723121	-0.381257			24.6	-3.37592	0.0323688								24.6	-2.19623	-2.32952
	24.7	0.95971	-1.72736			24.7	-3.67989	-0.285773								24.7	0.127227	-2.43956
	24.8	1.23962	-0.298488			24.8	-3.58134	0.0578043								24.8	-3.37076	-1.07619
	24.9	2.05065				24.9	-2.40335	-2.02188								24.9	-3.1026	-0.732637
	25	3.17468	-1.95586			25	-2.75336									25	-1.03485	-1.22902
	25.1	4.11463	0.300413			25.1	-3.31551	-1.18481								25.1	1.25621	-0.740658
	25.2	2.34741				25.2	-1.31872	0.573249								25.2	-1.78838	-0.0398167
	25.3	2.57514	-1.30374			25.3	0.458161									25.3	1.44726	0.476445
	25.4	3.67276				25.4	-0.480928									25.4	-3.2967	-0.169812
	25.5	4.075	1.03292			25.5	-1.6396	0.372301								25.5	-2.32415	-0.309204
	25.6	3.92764	-1.53944			25.6	-1.62557	1.6833								25.6	-3.19467	-2.32952
	25.7	3.14852	0.764206			25.7	-2.53772	-1.02602								25.7	0.664794
	25.8	2.179				25.8	-2.79693									25.8	-1.27338
	25.9	1.75303	-2.6792			25.9	-2.03642									25.9	-2.13282	-2.43956
	26	0.144994	0.379303													26	-2.41815	-1.07619
	26.1	0.349345	-3.53239													26.1	-2.65295	-0.732637
	26.2	0.14924														26.2	-0.0490081	-1.22902
	26.3	0.597533	1.85358													26.3	-1.04689	-0.740658
	26.4	2.43713	-2.20507													26.4	-1.70103	-0.0398167
	26.5	3.75017	0.802254													26.5	-2.5152	0.476445
	26.6	3.6295	-3.14808													26.6	-0.671993	-0.169812
	26.7	3.23018														26.7	-2.06969	-0.495549
	26.8	2.40573	1.99099													26.8	-1.55206	-1.87725
	26.9	2.70617														26.9	-1.74408
	27	1.99106	-1.38554													27	0.629215
	27.1	0.851232														27.1	-1.00827	0.159859
	27.2	1.16499	0.530676													27.2	-2.6182	-0.190529
	27.3	1.80565														27.3	-2.22267	0.476445
	27.4	1.27095	-1.1889													27.4	0.825524	-0.104325
	27.5	1.8528														27.5	-1.55635	-0.619168
	27.6	1.65805	0.322544
	27.7	1.5852	-0.243647
	27.8	1.31636
	27.9	0.928959	1.69126
	28	0.540547	-2.17084
	28.1	0.891191	1.25825
	28.2	1.04205
	28.3	2.24862	-2.38791
	28.4	2.30262	1.87949
	28.5	2.58158
	28.6	2.9902	-1.30695
	28.7	3.71085	-0.583411
	28.8	3.95954	-1.80395
	28.9	3.91628	0.511144
	29	2.70075	-2.15816
	29.1	2.94266	0.988964
	29.2	1.85933	-1.6185
	29.3	0.887688	0.994218
	29.4	1.0559	-2.7035
	29.5	0.655644	2.27808
	29.6	0.748541	-1.78145
	29.7	0.129533	1.20375
	29.8	-0.128022	-4.1007
	29.9	0.550026	0.703276
	30	0.741113	-1.77155
