# Supplementary material for: Ligand-specific activation trajectories dictate GPCR signalling in cells
Source: Nature. 2026 Jan 14;650(8103):1053–62. doi: 10.1038/s41586-025-09963-3 (PMC12935549; doi:10.1038/s41586-025-09963-3)
Supplement: Supplementary file 20 — Source Data Extended Data Fig. 9 [file 41586_2025_9963_MOESM20_ESM.xlsx]

## Sheet: Ext Data Fig 9
a) ACh													b) Ixo													c) Arec													d) Pilo
T84-Gendo	T84-GoA	E175-Gendo	E175-GoA	F181-Gendo	F181-GoA	F188-Gendo	F188-GoA	A414-Gendo	A414-GoA	P415-Gendo	P415-GoA		T84-Gendo	T84-GoA	E175-Gendo	E175-GoA	F181-Gendo	F181-GoA	F188-Gendo	F188-GoA	A414-Gendo	A414-GoA	P415-Gendo	P415-GoA		T84-Gendo	T84-GoA	E175-Gendo	E175-GoA	F181-Gendo	F181-GoA	F188-Gendo	F188-GoA	A414-Gendo	A414-GoA	P415-Gendo	P415-GoA		T84-Gendo	T84-GoA	E175-Gendo	E175-GoA	F181-Gendo	F181-GoA	F188-Gendo	F188-GoA	A414-Gendo	A414-GoA	P415-Gendo
0.1427	0.5847	0.4889	NA	1.202	1.796	1.747	2.128	0.2102	0.3789	0.1316	1.222		1.573	0.3895	0.747	NA	NA	14.7	1.317	11.76	0.5307	2.629	0.6024	0.5663		0.126	6.084	0.2844	NA	2.318	1.19	2.434	3.43	0.2035	0.7038	0.203	2.59		2.4548	1.468	0.2367	NA	2.394	1.314	5.837	7.31	0.3299	1.314	0.1957
0.1163	1.585	0.3001		1.679	1.696	4.258	3.423	0.2206	0.2433	0.1392	0.8772		1.617	0.3216	1.411			13.62	2.343	11.27	0.5061	3.899	0.2071	0.5539		0.6882	0.5908	0.4577		1.82	0.7038	2.463	5.393	0.1536	0.7316	0.1834	0.8779		2.3536	0.3279	0.2011		1.485	0.3836	4.703	9.371	0.2867	0.3836	0.2202
0.3698	0.3414	0.5264		1.795	1.384	2.642	2.695	0.1371	0.2762	0.1869	0.9349		1.216	1.119	1.031			14.47	3.506	8.897	0.5942	1.736	0.2866	0.5537		0.8269	1.06	0.2258		1.681	0.7316	1.894	3.552	1.369	0.8041	0.2689	1.666		2.6597	0.4691	0.3238		1.831	0.3399	4.584	9.902	0.3505	0.3399	0.2003
0.3343	0.1336	0.394		1.633	1.537	3.531	2.317	0.1218	0.2828	0.1584	0.16		1.729	1.503	1.058			14.03	4.535	8.007	0.6126	1.285	0.2465	0.5177		0.304	1.192	0.402		1.426	2.058	2.292	3.702	0.1635	0.7598	0.2655	1.522		2.528	0.5383	0.2071		1.921	0.3436	4.575	7.391	0.449	0.3436	0.1184
0.2261	0.2998	0.4128		1.515	1.9	2.93	2.709	0.1201	0.1058	0.1715	0.1472		1.165	1.532	1.005			13.63	1.956	7.069	0.4444	2.389	0.291	0.6727		0.516	0.8469	0.2193		1.71	0.8041	2.148	5.126	0.5883	0.7893	0.1761	0.07182		1.843	0.3196	0.2417		1.823	0.4926	4.828	10.27	0.394	0.4926	0.1546
0.1779	0.2022	0.3278		1.851	1.696	1.386	3.463	0.1085	0.09915	0.2104	0.154		1.896	1.249	1.936			13.79	1.77	7.113	0.7406	2.712	0.6522	0.5663		0.1647	3.855	0.172		1.161	0.7598	3.126	5.424	0.7543	0.6181	0.1699	0.1254		3.828	1.297	0.2454		1.312	0.3871	5.732	12.93	0.4361	0.3871	0.1956
0.3462	0.2233	0.3652		1.678	1.701	2.551	2.984	0.1204	0.1446	0.1496	0.4208		1.982	1.072	2.122			15.3	3.334	8.7	0.5093	2.086	0.8965	0.5539		0.1332	3.602	0.187		1.63	0.7893	2.936	4.798	0.5772	0.2389	0.2131	0.1339		3.663	2.005	0.2136		1.352	0.7805	4.552	8.165	0.3571	0.7805	0.1601
0.2206	0.1389	0.4525		1.464	1.625	2.927	2.928	0.1373	0.09965	0.1707	0.456		1.949	0.8569	0.6112			20.61	3.294	8.207	0.6289	3.079	0.5433	0.5537		0.1417	3.735	0.258		2.1	0.6181	2.808	3.388	1.151	0.2949	0.1589	0.1008		2.442	1.839	0.2583		1.331	0.5251	7.342	6.815	0.3338	0.5251	0.1353
0.101	1.163	0.3235		1.679	1.702	3.388	2.322	0.1369	0.101	0.1507	1.11		1.326	1.157	0.7287			14.21	1.214	7.244	0.5295	4.206	0.7138	0.5177		0.1551	4.702	0.227		2.466	2.022	2.347	6.714	1.859	0.3565	0.1897	0.0788		1.077	1.451	0.1573		1.585	0.5533	3.989	8.806	0.3357	0.5533	0.1864
0.1278	0.8918	0.6995		1.424	1.546	2.902	3.747	0.1115	0.1054	0.1462	0.3654		1.19	1.076	0.8965			17.08	3.359	8.818	0.621	0.3371	0.1714	0.6727		0.1265	1.535			2.713	1.954	2.652	2.679	0.5861	0.1197	0.18	0.1354		2.8829	1.412	0.1573		1.566	1.256	4.754	11.1	0.3772	1.256	0.1637
0.1668	1.486	0.5851		1.5	1.756	3.425	3.67	0.1286	0.1006	0.2214	0.2742		1.298	1.087	0.7138			12.73	5.587	9.019	0.7313	0.8034	0.1562	0.5388		0.103				1.155	3.34	2.523	8.063	1.841		0.2211	0.123		1.027	1.387	0.2765		1.429	0.4186	4.469	9.628	0.28	0.4186	0.1554
0.1419	1.405	0.6612		1.614	1.808	3.127	3.642	0.137	0.1854	0.1343	0.3369		0.2687	1.027	0.5689			13.73	3.307	10.51	0.6591	1.358	0.1436	0.3218		0.1125				1.194	2.32	3.298	2.543	1.615		0.1235	0.07446		1.566	1.018	0.07715		2.271	0.3623	7.665	5.522	0.2727	0.3623	0.115
0.1481	0.1394	0.5073		1.253	1.484	4.099	4.248	0.1605	0.1268	0.1807	0.4546		0.2501	1.076	0.6152			15.2	3.799	9.735	0.6859		0.1488	0.4014		0.09896				2.713	1.983	2.164	5.532	1.859		0.1248	0.06916		2.9497	1.198	0.1048		2.018	0.4111	7.975	6.11	0.2693	0.4111	0.1631
0.1821	0.3431	0.5159		1.73	1.817	2.241	4.459	0.1026	0.1185	0.1573	0.3413		0.2766	0.786				19.22	4.303	10.44	0.6792		0.1348	0.3651		0.116					1.737	2.556		0.1894		0.1796	0.2842		2.064	2.303	0.0918		2.229	1.113	5.644	5.779	0.2962	1.113	0.1596
0.1041		0.483		1.997	1.872	1.981	3.149	0.1979	0.1152	0.1563	0.7415		0.2724	1.57				20.27	2.893	13.53	0.8177		0.1376	0.39		0.1458					1.739	1.903		0.9205		0.2256	0.5952		2.044	2.689	0.1048		2.636	2.839	5.984	5.316	0.2704	0.6201	0.2407
0.1202		0.5724		1.478	1.54	2.167	3.207	0.1888	0.8486	0.1556	0.253		1.004					16.87	5.251	9.26	0.5472		0.273	0.3498		0.1291					1.753	2.57		0.7136		0.2647	1.25		2.014	1.335	0.1317		2.245	3.418	5.476	5.135	0.4357	1.512	0.1602
0.1514		0.6451		1.202	1.768	3.397	2.429	0.1517	0.9534	0.157	1.163		1.245					27.84	2.924		0.6483		0.2214	0.3337		0.1427					1.725	2.968		0.6439		0.3116	1.012		2.064	0.6356	0.1072		2.354	3.768	3.434	7.95	0.4674		0.3295
0.3609		0.452		1.352	1.743	2.127	3.226	0.212	1.502	0.1392	0.3802		1.009					16.98	2.775		0.7396		0.5076	0.374		0.1797					1.76	3.329		0.6022		0.2515	0.8281		1.195	0.1585	0.1116			3.75	2.075		0.4726		0.3145
0.4274		0.5782		1.04	1.677	1.57	3.178	0.2022	0.6895	0.1766	1.106		1.006					19.11	3.674		0.6483		0.1618	0.5635		0.6901					1.772	1.593		0.3823		0.3165	1.434		2.5516	0.1064	0.1399			3.676	2.412		0.2669		0.3254
0.3329		0.6304		1.331	1.659	4.31	2.606	0.2101	1.073	0.1422	0.8755		0.958					5.093	4.133		0.4921		0.4853	0.4723		0.9462					2.053	2.613		0.4665		0.1978			2.4831	0.8107	0.17			3.829	2.407		0.2329		0.2292
0.1966		0.5661		1.585	1.554	1.541	2.868	0.2168	0.7143	0.1869	0.6331		0.8358					32.51	2.041		0.6488		0.4727	0.3583		0.7027					1.972	2.805		0.4229		0.2006			2.4171		0.1579				2.038		0.2626		0.2457
0.2627		0.4717		1.566	1.821	1.997	3.99	0.1959	0.1286	0.1861			1.515					16.77			0.7888		0.4216	0.357		0.2844					1.843	2.905		0.392		0.22			0.2513		0.2554				2.191		0.1		0.2368
0.4195		0.38		1.429	2.01	2.25	2.635	0.2762	0.1176	0.1584			1.135					32.44			0.7235		0.555	0.4573		0.5668					2.036	0.3448		1.213		0.282			0.2747		0.2285				1.924				0.2244
0.3428		0.5171		1.316	1.779	1.365	3.487	0.1845	0.8322	0.1271			0.8185					29.54			0.2756		0.5481	0.5003		0.08012					3.185	1.241		0.5861		0.2916			0.3405		0.1441				6.571				0.1928
0.0993		0.4817		0.9972	1.42	3.957	4.185	0.184	0.2189	0.1314			0.5378					38.9			0.2665		0.4583	0.1768		1.04					2.371	0.9843		1.841		0.1991			0.3311		0.1857				4.905				0.1976
0.1302		0.5703		0.9301	1.566	3.115	3.512	0.1154	0.917	0.1697								18.65			0.1991		0.5434	0.1368							2.452	1.281		1.615		0.1923			0.3755						5.205				0.192
0.2667		0.6496		1.238	1.822	2.42		0.214	1.123	0.1281								29.86			0.3399		0.4613	0.1954							2.449	2.769							0.3129						6.41				0.2202
0.3113		0.4272		1.193	1.893	2.787		0.1162	0.7796	0.1431								6.05			0.1983		0.4451	0.3334							2.554	3.629							0.3558										0.2375
0.4508		0.4468		0.9998	1.976	2.001		0.1148	0.7476	0.1446								10.74			0.4558		0.5165								2.938	0.9787							2.619										0.1931
0.4673		0.3949		1.174	1.829	5.096		0.1742	1.302	0.1275											0.422		0.2288								2.483	2.07							2.379										0.2413
0.1639		0.3515		0.9671	1.983	4.483		0.2194	0.8555	0.162											0.3469		0.1562								2.895	1.983							3.188										0.2622
0.5093		0.5024		1.95	2.089	4.428		0.2799		0.1402											0.6772		0.2073								2.976	1.21							3.374										0.245
0.4852		0.5106		1.015	1.954	4.955		0.2305		0.1506											0.7076		0.1404								2.585	0.9591							3.329										0.2196
0.1577		0.2769		1.066	2.151	3.81				0.141											0.4517		0.1466								2.078	0.9539							2.685										0.2326
0.09034		0.6484		1.151	2.104	3.702				0.1519											0.551		0.126									2.509							3.958										0.3639
		0.6771		0.6386	2.142	2.719				0.1268											0.3032		0.1782																3.331										0.1596
		0.6196		0.7139	1.853	2.011				0.1765											0.3399		0.2071																3.081										0.2407
		0.5352		0.59	1.998	4.815				0.1831											0.1983		0.2866																3.121										0.1602
		0.6252		0.5637	2.366	1.931				0.1523													0.2465																0.3052										0.3295
		0.628		0.948	2.396	3.019				0.127													0.291																										0.3145
		0.6036		0.8297	2.082	1.49				0.19																																							0.07692
		0.3949		1.316		1.395				0.1993																																							0.05196
		0.3515		1.91		1.564				0.1402																																							0.05592
		0.5024		1.491		1.643				0.1441
				1.937		1.214				0.1557
				1.625		1.55				0.1509
				1.365		1.512				0.2162
				0.8347		1.221				0.1435
				1.415		2.238				0.1691
				1.082		2.158				0.1663
				0.969		2.176				0.1473
				0.8888		2.712				0.2113
				1.401		2.452				0.1301
				0.8889		2.656				0.1664
				1.375		2.73				0.2247
				1.269		2.464				0.2049
				1.315		2.44
				1.397		2.596
				1.276		1.365
				1.417		3.957
				1.312		3.115
				1.122		2.42
				1.343		2.787
				1.292		2.001
				1.113		5.096
				1.27		4.483
				1.209		4.428
				0.999		4.955
				1.834		3.81
				1.81		3.702
				1.849		2.719
				1.684		2.011
				1.287		2.961
				1.053		2.777
				1.762		3.208
				1.75		2.973
						2.736
						3.397
						2.771
						3.264
						3.113
						3.056
						2.98
						3.754
						3.325
						3.346
						0.9721
						1.079
						1.133
						1.472
						1.379
						1.177
						1.484
						1.572
						1.443
						0.8879
[truncated: 1 more columns]

## Sheet: Ext Data Fig 9 - ANOVA
a)	Tukey's multiple comparisons test	Mean Diff.	95.00% CI of diff.	Below threshold?	Summary	Adjusted P Value					b)	Tukey's multiple comparisons test	Mean Diff.	95.00% CI of diff.	Below threshold?	Summary	Adjusted P Value					c)	Tukey's multiple comparisons test	Mean Diff.	95.00% CI of diff.	Below threshold?	Summary	Adjusted P Value					d)	Tukey's multiple comparisons test	Mean Diff.	95.00% CI of diff.	Below threshold?	Summary	Adjusted P Value
	84 vs. 175	-0.254	-0.6399 to 0.1319	No	ns	0.4121	A-B					84 vs. 175	0.08874	-0.4354 to 0.6129	No	ns	0.99	A-B					84 vs. 175	0.07046	-0.5322 to 0.6731	No	ns	0.9994	A-B					84 vs. 175	1.914	1.258 to 2.570	Yes	****	<0.0001	A-B
	84 vs. 181	-1.084	-1.432 to -0.7355	Yes	****	<0.0001	A-C					84 vs. 188	-2.083	-2.536 to -1.629	Yes	****	<0.0001	A-D					84 vs. 181	-1.512	-2.042 to -0.9819	Yes	****	<0.0001	A-C					84 vs. 181	0.2258	-0.5180 to 0.9697	No	ns	0.9519	A-C
	84 vs. 188	-2.445	-2.781 to -2.108	Yes	****	<0.0001	A-D					84 vs. 414	0.5898	0.1950 to 0.9845	Yes	***	0.0006	A-E					84 vs. 188	-1.866	-2.272 to -1.460	Yes	****	<0.0001	A-D					84 vs. 188	-2.634	-3.274 to -1.993	Yes	****	<0.0001	A-D
	84 vs. 414	0.07637	-0.3371 to 0.4898	No	ns	0.995	A-E					84 vs. 415	0.788	0.3953 to 1.181	Yes	****	<0.0001	A-F					84 vs. 414	-0.5326	-0.9668 to -0.09836	Yes	**	0.007	A-E					84 vs. 414	1.765	1.082 to 2.447	Yes	****	<0.0001	A-E
	84 vs. 415	0.08631	-0.2808 to 0.4534	No	ns	0.9847	A-F					175 vs. 188	-2.171	-2.712 to -1.630	Yes	****	<0.0001	B-D					84 vs. 415	0.125	-0.3092 to 0.5593	No	ns	0.9608	A-F					84 vs. 415	1.89	1.324 to 2.456	Yes	****	<0.0001	A-F
	175 vs. 181	-0.8296	-1.152 to -0.5068	Yes	****	<0.0001	B-C					175 vs. 414	0.501	0.008498 to 0.9935	Yes	*	0.0441	B-E					175 vs. 181	-1.582	-2.255 to -0.9103	Yes	****	<0.0001	B-C					175 vs. 181	-1.688	-2.493 to -0.8838	Yes	****	<0.0001	B-C
	175 vs. 188	-2.191	-2.501 to -1.881	Yes	****	<0.0001	B-D					175 vs. 415	0.6992	0.2083 to 1.190	Yes	**	0.0012	B-F					175 vs. 188	-1.936	-2.516 to -1.357	Yes	****	<0.0001	B-D					175 vs. 188	-4.548	-5.258 to -3.837	Yes	****	<0.0001	B-D
	175 vs. 414	0.3304	-0.06198 to 0.7228	No	ns	0.1545	B-E					188 vs. 414	2.672	2.256 to 3.089	Yes	****	<0.0001	D-E					175 vs. 414	-0.6031	-1.203 to -0.003509	Yes	*	0.0478	B-E					175 vs. 414	-0.1496	-0.8978 to 0.5986	No	ns	0.9924	B-E
	175 vs. 415	0.3403	-0.002917 to 0.6836	No	ns	0.0535	B-F					188 vs. 415	2.871	2.456 to 3.285	Yes	****	<0.0001	D-F					175 vs. 415	0.05456	-0.5450 to 0.6541	No	ns	0.9998	B-F					175 vs. 415	-0.02387	-0.6676 to 0.6198	No	ns	>0.9999	B-F
	181 vs. 188	-1.361	-1.623 to -1.100	Yes	****	<0.0001	C-D					414 vs. 415	0.1982	-0.1512 to 0.5476	No	ns	0.5197	E-F					181 vs. 188	-0.354	-0.8575 to 0.1495	No	ns	0.329	C-D					181 vs. 188	-2.859	-3.652 to -2.067	Yes	****	<0.0001	C-D
	181 vs. 414	1.16	0.8047 to 1.515	Yes	****	<0.0001	C-E																181 vs. 414	0.9794	0.4528 to 1.506	Yes	****	<0.0001	C-E					181 vs. 414	1.539	0.7123 to 2.365	Yes	****	<0.0001	C-E
	181 vs. 415	1.17	0.8698 to 1.470	Yes	****	<0.0001	C-F																181 vs. 415	1.637	1.110 to 2.164	Yes	****	<0.0001	C-F					181 vs. 415	1.664	0.9312 to 2.398	Yes	****	<0.0001	C-F
	188 vs. 414	2.521	2.177 to 2.865	Yes	****	<0.0001	D-E																188 vs. 414	1.333	0.9321 to 1.735	Yes	****	<0.0001	D-E					188 vs. 414	4.398	3.663 to 5.133	Yes	****	<0.0001	D-E
	188 vs. 415	2.531	2.245 to 2.818	Yes	****	<0.0001	D-F																188 vs. 415	1.991	1.590 to 2.392	Yes	****	<0.0001	D-F					188 vs. 415	4.524	3.895 to 5.152	Yes	****	<0.0001	D-F
	414 vs. 415	0.009942	-0.3640 to 0.3839	No	ns	>0.9999	E-F																414 vs. 415	0.6576	0.2277 to 1.088	Yes	***	0.0003	E-F					414 vs. 415	0.1257	-0.5452 to 0.7966	No	ns	0.9944	E-F
	Test details	Mean 1	Mean 2	Mean Diff.	SE of diff.	n1	n2	q	DF			Test details	Mean 1	Mean 2	Mean Diff.	SE of diff.	n1	n2	q	DF			Test details	Mean 1	Mean 2	Mean Diff.	SE of diff.	n1	n2	q	DF			Test details	Mean 1	Mean 2	Mean Diff.	SE of diff.	n1	n2	q	DF
	84 vs. 175	0.2472	0.5012	-0.254	0.1346	35	44	2.668	334			84 vs. 175	1.123	1.034	0.08874	0.1895	25	13	0.6623	131			84 vs. 175	0.3408	0.2704	0.07046	0.2083	25	9	0.4784	128			84 vs. 175	2.095	0.1812	1.914	0.2274	39	25	11.9	167
	84 vs. 181	0.2472	1.331	-1.084	0.1214	35	76	12.62	334			84 vs. 188	1.123	3.205	-2.083	0.164	25	21	17.96	131			84 vs. 181	0.3408	1.853	-1.512	0.1832	25	13	11.67	128			84 vs. 181	2.095	1.87	0.2258	0.258	39	17	1.238	167
	84 vs. 188	0.2472	2.692	-2.445	0.1174	35	96	29.46	334			84 vs. 414	1.123	0.5332	0.5898	0.1427	25	38	5.845	131			84 vs. 188	0.3408	2.207	-1.866	0.1403	25	35	18.81	128			84 vs. 188	2.095	4.729	-2.634	0.2223	39	27	16.76	167
	84 vs. 414	0.2472	0.1708	0.07637	0.1442	35	33	0.7488	334			84 vs. 415	1.123	0.3349	0.788	0.142	25	39	7.849	131			84 vs. 414	0.3408	0.8734	-0.5326	0.1501	25	26	5.019	128			84 vs. 414	2.095	0.3308	1.765	0.2367	39	22	10.54	167
	84 vs. 415	0.2472	0.1609	0.08631	0.1281	35	56	0.953	334			175 vs. 188	1.034	3.205	-2.171	0.1956	13	21	15.7	131			84 vs. 415	0.3408	0.2158	0.125	0.1501	25	26	1.178	128			84 vs. 415	2.095	0.205	1.89	0.1963	39	43	13.62	167
	175 vs. 181	0.5012	1.331	-0.8296	0.1126	44	76	10.42	334			175 vs. 414	1.034	0.5332	0.501	0.1781	13	38	3.979	131			175 vs. 181	0.2704	1.853	-1.582	0.2323	9	13	9.632	128			175 vs. 181	0.1812	1.87	-1.688	0.2791	25	17	8.556	167
	175 vs. 188	0.5012	2.692	-2.191	0.1082	44	96	28.63	334			175 vs. 415	1.034	0.3349	0.6992	0.1775	13	39	5.572	131			175 vs. 188	0.2704	2.207	-1.936	0.2002	9	35	13.68	128			175 vs. 188	0.1812	4.729	-4.548	0.2464	25	27	26.1	167
	175 vs. 414	0.5012	0.1708	0.3304	0.1369	44	33	3.413	334			188 vs. 414	3.205	0.5332	2.672	0.1507	21	38	25.08	131			175 vs. 414	0.2704	0.8734	-0.6031	0.2072	9	26	4.116	128			175 vs. 414	0.1812	0.3308	-0.1496	0.2595	25	22	0.8152	167
	175 vs. 415	0.5012	0.1609	0.3403	0.1198	44	56	4.019	334			188 vs. 415	3.205	0.3349	2.871	0.15	21	39	27.07	131			175 vs. 415	0.2704	0.2158	0.05456	0.2072	9	26	0.3723	128			175 vs. 415	0.1812	0.205	-0.02387	0.2233	25	43	0.1512	167
	181 vs. 188	1.331	2.692	-1.361	0.09127	76	96	21.09	334			414 vs. 415	0.5332	0.3349	0.1982	0.1263	38	39	2.219	131			181 vs. 188	1.853	2.207	-0.354	0.174	13	35	2.877	128			181 vs. 188	1.87	4.729	-2.859	0.2749	17	27	14.71	167
	181 vs. 414	1.331	0.1708	1.16	0.1239	76	33	13.24	334														181 vs. 414	1.853	0.8734	0.9794	0.182	13	26	7.611	128			181 vs. 414	1.87	0.3308	1.539	0.2867	17	22	7.591	167
	181 vs. 415	1.331	0.1609	1.17	0.1047	76	56	15.8	334														181 vs. 415	1.853	0.2158	1.637	0.182	13	26	12.72	128			181 vs. 415	1.87	0.205	1.664	0.2543	17	43	9.255	167
	188 vs. 414	2.692	0.1708	2.521	0.12	96	33	29.72	334														188 vs. 414	2.207	0.8734	1.333	0.1387	35	26	13.59	128			188 vs. 414	4.729	0.3308	4.398	0.255	27	22	24.39	167
	188 vs. 415	2.692	0.1609	2.531	0.09995	96	56	35.81	334														188 vs. 415	2.207	0.2158	1.991	0.1387	35	26	20.3	128			188 vs. 415	4.729	0.205	4.524	0.218	27	43	29.35	167
	414 vs. 415	0.1708	0.1609	0.009942	0.1305	33	56	0.1078	334														414 vs. 415	0.8734	0.2158	0.6576	0.1486	26	26	6.258	128			414 vs. 415	0.3308	0.205	0.1257	0.2327	22	43	0.764	167
	ANOVA summary											ANOVA summary											ANOVA summary											ANOVA summary
	F	205.8										F	104										F	64.21										F	112.5
	P value	<0.0001										P value	<0.0001										P value	<0.0001										P value	<0.0001
	P value summary	****										P value summary	****										P value summary	****										P value summary	****
	Significant diff. among means (P < 0.05)?	Yes										Significant diff. among means (P < 0.05)?	Yes										Significant diff. among means (P < 0.05)?	Yes										Significant diff. among means (P < 0.05)?	Yes
	R squared	0.755										R squared	0.7606										R squared	0.715										R squared	0.7711
	Brown-Forsythe test											Brown-Forsythe test											Brown-Forsythe test											Brown-Forsythe test
	F (DFn, DFd)	66.05 (5, 334)										F (DFn, DFd)	19.12 (4, 131)										F (DFn, DFd)	9.919 (5, 128)										F (DFn, DFd)	27.01 (5, 167)
	P value	<0.0001										P value	<0.0001										P value	<0.0001										P value	<0.0001
	P value summary	****										P value summary	****										P value summary	****										P value summary	****
	Are SDs significantly different (P < 0.05)?	Yes										Are SDs significantly different (P < 0.05)?	Yes										Are SDs significantly different (P < 0.05)?	Yes										Are SDs significantly different (P < 0.05)?	Yes
	Bartlett's test											Bartlett's test											Bartlett's test											Bartlett's test
	Bartlett's statistic (corrected)	715.1										Bartlett's statistic (corrected)	136.4										Bartlett's statistic (corrected)	134.3										Bartlett's statistic (corrected)	396.4
	P value	<0.0001										P value	<0.0001										P value	<0.0001										P value	<0.0001
	P value summary	****										P value summary	****										P value summary	****										P value summary	****
	Are SDs significantly different (P < 0.05)?	Yes										Are SDs significantly different (P < 0.05)?	Yes										Are SDs significantly different (P < 0.05)?	Yes										Are SDs significantly different (P < 0.05)?	Yes
	ANOVA table	SS	DF	MS	F (DFn, DFd)	P value						ANOVA table	SS	DF	MS	F (DFn, DFd)	P value						ANOVA table	SS	DF	MS	F (DFn, DFd)	P value						ANOVA table	SS	DF	MS	F (DFn, DFd)	P value
	Treatment (between columns)	363.6	5	72.73	F (5, 334) = 205.8	P<0.0001						Treatment (between columns)	127.8	4	31.95	F (4, 131) = 104.0	P<0.0001						Treatment (between columns)	92.17	5	18.43	F (5, 128) = 64.21	P<0.0001						Treatment (between columns)	443.3	5	88.66	F (5, 167) = 112.5	P<0.0001
	Residual (within columns)	118	334	0.3533								Residual (within columns)	40.23	131	0.3071								Residual (within columns)	36.75	128	0.2871								Residual (within columns)	131.6	167	0.7881
	Total	481.7	339									Total	168	135									Total	128.9	133									Total	574.9	172
	Data summary											Data summary											Data summary											Data summary
	Number of treatments (columns)	6										Number of treatments (columns)	5										Number of treatments (columns)	6										Number of treatments (columns)	6
	Number of values (total)	340										Number of values (total)	136										Number of values (total)	134										Number of values (total)	173

## Sheet: Ext Data Fig 9 - t tests
a)	Table Analyzed		Acetylcholine									b)	Table Analyzed		Iperoxo									c)	Table Analyzed		Arecoline								d)	Table Analyzed		Pilocarpine
	Column I				T84-GoA	E175-GoA	F181-GoA	F188-GoA	A414-GoA	P415-GoA			Column I				T84-GoA	E175-GoA	F181-GoA	F188-GoA	A414-GoA	P415-GoA			Column I			T84-GoA	E175-GoA	F181-GoA	F188-GoA	A414-GoA	P415-GoA			Column I			T84-GoA	E175-GoA	F181-GoA	F188-GoA	A414-GoA	P415-GoA
	vs.				vs.	vs.	vs.	vs.	vs.	vs.			vs.				vs.	vs.	vs.	vs.	vs.	vs.			vs.			vs.	vs.	vs.	vs.	vs.	vs.			vs.			vs.	vs.	vs.	vs.	vs.	vs.
	Column A				T84-Gendo	E175-Gendo	F181-Gendo	F188-Gendo	A414-Gendo	P415-Gendo			Column A				T84-Gendo	E175-Gendo	F181-Gendo	F188-Gendo	A414-Gendo	P415-Gendo			Column A			T84-Gendo	E175-Gendo	F181-Gendo	F188-Gendo	A414-Gendo	P415-Gendo			Column A			T84-Gendo	E175-Gendo	F181-Gendo	F188-Gendo	A414-Gendo	P415-Gendo
	Unpaired t test with Welch's correction												Unpaired t test with Welch's correction												Unpaired t test with Welch's correction											Unpaired t test with Welch's correction
	P value				0.0203	<0.0001	<0.0001	0.003	0.0002	<0.0001			P value				0.6309	<0.0001	<0.0001	<0.0001	0.0005	0.0155			P value			0.0034	<0.0001	0.5997	0.0001	0.0254	0.0122			P value			0.0002	<0.0001	0.2775	<0.0001	0.0034	0.2171
	P value summary				*	****	****	**	***	****			P value summary				ns	****	****	****	***	*			P value summary			**	****	ns	***	*	*			P value summary			***	****	ns	****	**	ns
	Significantly different (P < 0.05)?				Yes	Yes	Yes	Yes	Yes	Yes			Significantly different (P < 0.05)?				No	Yes	Yes	Yes	Yes	Yes			Significantly different (P < 0.05)?			Yes	Yes	No	Yes	Yes	Yes			Significantly different (P < 0.05)?			Yes	Yes	No	Yes	Yes	No
	One- or two-tailed P value?				Two-tailed	Two-tailed	Two-tailed	Two-tailed	Two-tailed	Two-tailed			One- or two-tailed P value?				Two-tailed	Two-tailed	Two-tailed	Two-tailed	Two-tailed	Two-tailed			One- or two-tailed P value?			Two-tailed	Two-tailed	Two-tailed	Two-tailed	Two-tailed	Two-tailed			One- or two-tailed P value?			Two-tailed	Two-tailed	Two-tailed	Two-tailed	Two-tailed	Two-tailed
	Welch-corrected t, df				t=2.626, df=13.58	t=29.41, df=43.00	t=9.057, df=108.2	t=3.081, df=67.79	t=4.175, df=30.76	t=5.415, df=20.08			Welch-corrected t, df				t=0.4844, df=37.10	t=7.447, df=12.00	t=12.46, df=28.00	t=11.86, df=24.55	t=4.898, df=11.16	t=2.484, df=65.94			Welch-corrected t, df			t=3.917, df=9.183	t=8.328, df=8.000	t=0.5308, df=28.47	t=5.180, df=14.24	t=2.342, df=33.08	t=2.785, df=18.13			Welch-corrected t, df			t=3.937, df=54.07	t=13.74, df=24.00	t=1.112, df=22.98	t=5.263, df=28.10	t=3.426, df=16.14	t=1.320, df=9.711
	How large is the effect?												How large is the effect?												How large is the effect?											How large is the effect?
	Mean of column A				0.2472	0.5012	1.331	2.692	0.1708	0.1609			Mean of column A				1.123	1.034	0	3.205	0.5332	0.3404			Mean of column A			0.3408	0.2704	1.853	2.207	0.8734	0.2158			Mean of column A			2.095	0.1812	1.87	4.729	0.3308	0.205
	Mean of column I				0.6384	0	1.817	3.2	0.4931	0.5908			Mean of column I				1.055	0	18.41	9.349	2.21	0.4412			Mean of column I			2.72	0	1.96	4.642	0.5417	0.6827			Mean of column I			1.138	0	1.498	8.088	0.6758	0.2789
	Difference between means (I - A) ± SEM				0.3912 ± 0.1489	-0.5012 ± 0.01704	0.4862 ± 0.05368	0.5083 ± 0.1650	0.3223 ± 0.07719	0.4299 ± 0.07939			Difference between means (I - A) ± SEM				-0.06812 ± 0.1406	-1.034 ± 0.1389	18.41 ± 1.478	6.143 ± 0.5182	1.677 ± 0.3423	0.1008 ± 0.04057			Difference between means (I - A) ± SEM			2.379 ± 0.6075	-0.2704 ± 0.03246	0.1069 ± 0.2013	2.435 ± 0.4701	-0.3317 ± 0.1417	0.4669 ± 0.1677			Difference between means (I - A) ± SEM			-0.9570 ± 0.2431	-0.1812 ± 0.01318	-0.3715 ± 0.3340	3.359 ± 0.6383	0.3450 ± 0.1007	0.07386 ± 0.05595
	95% confidence interval				0.07078 to 0.7116	-0.5356 to -0.4669	0.3798 to 0.5926	0.1791 to 0.8375	0.1648 to 0.4797	0.2643 to 0.5955			95% confidence interval				-0.3530 to 0.2168	-1.337 to -0.7316	15.38 to 21.44	5.075 to 7.211	0.9246 to 2.429	0.01978 to 0.1818			95% confidence interval			1.009 to 3.749	-0.3452 to -0.1955	-0.3052 to 0.5189	1.428 to 3.442	-0.6200 to -0.04353	0.1149 to 0.8190			95% confidence interval			-1.444 to -0.4696	-0.2084 to -0.1540	-1.062 to 0.3194	2.052 to 4.667	0.1317 to 0.5584	-0.05131 to 0.1990
	R squared (eta squared)				0.3369	0.9526	0.4312	0.1228	0.3617	0.5936			R squared (eta squared)				0.006284	0.8221	0.8471	0.8513	0.6826	0.08558			R squared (eta squared)			0.6256	0.8966	0.0098	0.6533	0.1422	0.2996			R squared (eta squared)			0.2227	0.8873	0.05108	0.4963	0.4211	0.1521
	F test to compare variances												F test to compare variances												F test to compare variances											F test to compare variances
	F, DFn, Dfd				18.17, 13, 34	Infinity, 43, 6	2.115, 75, 40	2.846, 95, 25	74.07, 30, 32	192.9, 20, 55			F, DFn, Dfd				2.093, 24, 14	Infinity, 12, 3	Infinity, 28, 4	2.304, 15, 20	44.62, 11, 37	1.942, 39, 27			F, DFn, Dfd			39.39, 9, 24	Infinity, 8, 6	1.717, 33, 12	4.083, 12, 34	5.089, 25, 9	195.2, 18, 25			F, DFn, Dfd			2.452, 38, 19	Infinity, 24, 7	10.96, 19, 16	1.639, 16, 26	19.30, 15, 21	5.976, 9, 42
	P value				<0.0001	<0.0001	0.011	0.004	<0.0001	<0.0001			P value				0.1532	<0.0001	<0.0001	0.0826	<0.0001	0.0739			P value			<0.0001	<0.0001	0.3191	0.0012	0.0152	<0.0001			P value			0.0394	<0.0001	<0.0001	0.2552	<0.0001	<0.0001
	P value summary				****	****	*	**	****	****			P value summary				ns	****	****	ns	****	ns			P value summary			****	****	ns	**	*	****			P value summary			*	****	****	ns	****	****
	Significantly different (P < 0.05)?				Yes	Yes	Yes	Yes	Yes	Yes			Significantly different (P < 0.05)?				No	Yes	Yes	No	Yes	No			Significantly different (P < 0.05)?			Yes	Yes	No	Yes	Yes	Yes			Significantly different (P < 0.05)?			Yes	Yes	Yes	No	Yes	Yes
	Data analyzed												Data analyzed												Data analyzed											Data analyzed
	Sample size, column A				35	44	76	96	33	56			Sample size, column A				25	13	5	21	38	40			Sample size, column A			25	9	13	35	26	26			Sample size, column A			39	25	17	27	22	43
	Sample size, column I				14	10	41	26	31	21			Sample size, column I				15	11	29	16	12	28			Sample size, column I			10	8	34	13	10	19			Sample size, column I			20	11	20	17	16	10
