# Supplementary material for: Ligand-specific activation trajectories dictate GPCR signalling in cells
Source: Nature. 2026 Jan 14;650(8103):1053–62. doi: 10.1038/s41586-025-09963-3 (PMC12935549; doi:10.1038/s41586-025-09963-3)
Supplement: Supplementary file 21 — Source Data Extended Data Fig. 10 [file 41586_2025_9963_MOESM21_ESM.xlsx]

## Sheet: Ext Data Fig 10a
Gi1					Gi2					Gi3					GoA					GoB					Gz					G15
ACh (log M)	Mean	SEM	N		ACh (log M)	Mean	SEM	N		ACh (log M)	Mean	SEM	N		ACh (log M)	Mean	SEM	N		ACh (log M)	Mean	SEM	N		ACh (log M)	Mean	SEM	N		ACh (log M)	Mean	SEM	N
-3	100.684	1.82084	3		-3	107.361	3.99441	3		-3	103.413	2.29639	3		-3	101.922	1.28114	5		-3	101.693	2.10306	5		-3	103.86	1.76222	5		-3	97.9337	8.10863	4
-4	101.759	2.25144	4		-4	100.296	4.04519	4		-4	101.05	4.74436	4		-4	102.124	2.99776	3		-4	99.4726	0.350705	3		-4	100.417	2.1874	6		-4	91.9936	3.01056	5
-5.5	95.7884	1.97624	4		-5.5	99.8061	3.14701	4		-5.5	87.2718	5.50484	4		-5.5	95.4045	0.933601	3		-5.5	97.7925	1.7318	3		-5.5	85.7379	7.18513	6		-5.5	104.533	17.9893	5
-6	92.5891	4.55857	4		-6	91.7273	4.5799	4		-6	74.1643	9.66859	4		-6	94.3928	2.18261	6		-6	97.7711	2.1013	5		-6	71.4134	6.08383	6		-6	80.5039	10.9429	5
-6.5	81.6422	9.5269	4		-6.5	82.6797	7.29127	4		-6.5	51.4658	12.1291	4		-6.5	84.3584	4.1178	6		-6.5	93.663	2.32845	5		-6.5	53.975	10.6749	6		-6.5	62.7545	11.6878	5
-7	62.4395	10.3046	4		-7	67.303	9.99969	4		-7	32.1413	10.0831	4		-7	69.197	5.30082	6		-7	81.2899	5.12724	5		-7	32.6923	8.1639	6		-7	41.4847	15.398	5
-7.5	40.6893	9.27679	4		-7.5	50.5186	6.63363	4		-7.5	12.1181	3.77807	4		-7.5	42.4891	9.46127	6		-7.5	63.935	6.11255	5		-7.5	16.217	5.27571	6		-7.5	22.908	11.6406	5
-8	18.243	7.07652	4		-8	20.0858	11.4228	4		-8	3.8884	1.37189	4		-8	18.4178	7.8423	6		-8	34.3414	12.0097	5		-8	6.45811	3.00649	6		-8	6.29858	9.76314	5
-10	-0.189271	1.11731	3		-10	4.75561	1.67634	4		-10	-2.1368	1.27465	4		-8.5	5.48295	3.8101	3		-8.5	15.8011	2.33421	2		-10	0.0174292	1.37791	6		-10	-3.00218	12.1336	4
-14	0.242412	1.51478	4		-14	-4.84503	2.32759	4		-14	2.6743	0.772724	4		-9	2.70912	3.00911	3		-9	1.41535	4.33892	2		-14	-3.70626	0.732709	6		-14	7.17172	11.031	4
															-10	4.17961	2.62383	6		-10	2.2406	2.27805	5
															-14	-1.54739	2.19084	6		-14	-0.522513	0.2643	5
Best-fit values					Best-fit values					Best-fit values					Best-fit values					Best-fit values					Best-fit values					Best-fit values
LogEC50		-7.273			LogEC50		-7.403			LogEC50		-6.546			LogEC50		-7.345			LogEC50		-7.721			LogEC50		-6.565			LogEC50		-6.817
HillSlope		0.845			HillSlope		0.8169			HillSlope		0.838			HillSlope		0.9378			HillSlope		0.9613			HillSlope		0.7506			HillSlope		0.8868
EC50		5.332e-08			EC50		3.949e-08			EC50		2.842e-07			EC50		4.52e-08			EC50		1.903e-08			EC50		2.721e-07			EC50		1.524e-07
95% CI (profile likelihood)					95% CI (profile likelihood)					95% CI (profile likelihood)					95% CI (profile likelihood)					95% CI (profile likelihood)					95% CI (profile likelihood)					95% CI (profile likelihood)
LogEC50		-7.421 to -7.130			LogEC50		-7.571 to -7.246			LogEC50		-6.697 to -6.394			LogEC50		-7.452 to -7.238			LogEC50		-7.833 to -7.613			LogEC50		-6.708 to -6.421			LogEC50		-7.091 to -6.549
HillSlope		0.6436 to 1.120			HillSlope		0.6009 to 1.121			HillSlope		0.6448 to 1.105			HillSlope		0.7574 to 1.178			HillSlope		0.7629 to 1.233			HillSlope		0.5946 to 0.9548			HillSlope		0.5527 to 1.486
EC50		3.797e-008 to 7.405e-008			EC50		2.687e-008 to 5.671e-008			EC50		2.009e-007 to 4.039e-007			EC50		3.533e-008 to 5.776e-008			EC50		1.470e-008 to 2.438e-008			EC50		1.960e-007 to 3.794e-007			EC50		8.112e-008 to 2.828e-007
Goodness of Fit					Goodness of Fit					Goodness of Fit					Goodness of Fit					Goodness of Fit					Goodness of Fit					Goodness of Fit
Degrees of Freedom		36			Degrees of Freedom		37			Degrees of Freedom		37			Degrees of Freedom		57			Degrees of Freedom		48			Degrees of Freedom		57			Degrees of Freedom		45
R squared		0.9273			R squared		0.9208			R squared		0.9223			R squared		0.9338			R squared		0.9454			R squared		0.9042			R squared		0.7224
Sum of Squares		4450			Sum of Squares		5250			Sum of Squares		5151			Sum of Squares		6825			Sum of Squares		4725			Sum of Squares		9675			Sum of Squares		26480
Sy.x		11.12			Sy.x		11.91			Sy.x		11.8			Sy.x		10.94			Sy.x		9.922			Sy.x		13.03			Sy.x		24.26
log(agonist) vs. normalized response					log(agonist) vs. normalized response					log(agonist) vs. normalized response					log(agonist) vs. normalized response					log(agonist) vs. normalized response					log(agonist) vs. normalized response					log(agonist) vs. normalized response
Best-fit values					Best-fit values					Best-fit values					Best-fit values					Best-fit values					Best-fit values					Best-fit values
LogEC50		-7.269			LogEC50		-7.398			LogEC50		-6.55			LogEC50		-7.345			LogEC50		-7.718			LogEC50		-6.571			LogEC50		-6.814
EC50		5.388e-08			EC50		4.001e-08			EC50		2.818e-07			EC50		4.52e-08			EC50		1.913e-08			EC50		2.683e-07			EC50		1.536e-07
95% CI (profile likelihood)					95% CI (profile likelihood)					95% CI (profile likelihood)					95% CI (profile likelihood)					95% CI (profile likelihood)					95% CI (profile likelihood)					95% CI (profile likelihood)
LogEC50		-7.405 to -7.132			LogEC50		-7.546 to -7.250			LogEC50		-6.695 to -6.405			LogEC50		-7.449 to -7.241			LogEC50		-7.825 to -7.613			LogEC50		-6.708 to -6.434			LogEC50		-7.073 to -6.555
EC50		3.932e-008 to 7.372e-008			EC50		2.843e-008 to 5.624e-008			EC50		2.017e-007 to 3.940e-007			EC50		3.559e-008 to 5.738e-008			EC50		1.497e-008 to 2.436e-008			EC50		1.957e-007 to 3.682e-007			EC50		8.443e-008 to 2.784e-007
Goodness of Fit					Goodness of Fit					Goodness of Fit					Goodness of Fit					Goodness of Fit					Goodness of Fit					Goodness of Fit
Degrees of Freedom		37			Degrees of Freedom		38			Degrees of Freedom		38			Degrees of Freedom		58			Degrees of Freedom		49			Degrees of Freedom		58			Degrees of Freedom		46
R squared		0.9243			R squared		0.9171			R squared		0.9187			R squared		0.9334			R squared		0.9452			R squared		0.8947			R squared		0.7208
Sum of Squares		4636			Sum of Squares		5493			Sum of Squares		5392			Sum of Squares		6865			Sum of Squares		4736			Sum of Squares		10630			Sum of Squares		26630
Sy.x		11.19			Sy.x		12.02			Sy.x		11.91			Sy.x		10.88			Sy.x		9.831			Sy.x		13.54			Sy.x		24.06
Number of points					Number of points					Number of points					Number of points					Number of points					Number of points					Number of points
# of X values		38			# of X values		39			# of X values		39			# of X values		59			# of X values		50			# of X values		59			# of X values		47
# Y values analyzed		38			# Y values analyzed		39			# Y values analyzed		39			# Y values analyzed		59			# Y values analyzed		50			# Y values analyzed		59			# Y values analyzed		47

## Sheet: Ext Data Fig 10b
Gi1					Gi2					Gi3					GoA					GoB					Gz					G15
Ixo (log M)	Mean	SEM	N		Ixo (log M)	Mean	SEM	N		Ixo (log M)	Mean	SEM	N		Ixo (log M)	Mean	SEM	N		Ixo (log M)	Mean	SEM	N		Ixo (log M)	Mean	SEM	N		Ixo (log M)	Mean	SEM	N
-6	99.5721	0.461372	6		-6	96.0906	1.79926	6		-6	100.517	1.24416	6		-6	95.8028	1.36275	4		-6	101.002	1.4966	7		-6	99.5046	0.571803	5		-6	96.8453	5.22741	4
-7	101.889	0.788743	4		-7	101.919	2.78625	4		-7	97.9786	1.76609	3		-7	95.9787	0	1		-7	95.4764	1.78965	5		-7	97.8381	2.79437	4		-7	100.799	2.4069	3
-7.5	100.638	2.7702	4		-7.5	95.7078	5.18803	4		-7.5	92.0415	2.9751	3		-7.5	99.1801	0	1		-7.5	95.9718	0.746381	4		-7.5	90.3701	6.34937	3		-7.5	88.5288	7.42317	3
-8	94.3021	1.19514	7		-8	99.2352	2.28393	7		-8	82.4813	3.85952	6		-8	99.8604	2.2227	4		-8	96.5434	1.25285	8		-8	83.1208	4.78067	6		-8	87.7202	6.60869	5
-8.5	80.3274	4.37259	4		-8.5	98.0318	2.23551	4		-8.5	72.2568	8.85684	3		-8.5	96.7796	0	1		-8.5	93.6379	1.74874	5		-8.5	75.5511	7.34633	4		-8.5	90.1494	3.95163	3
-9	64.3303	5.80341	7		-9	78.4549	3.8999	7		-9	38.4539	7.35556	6		-9	81.9937	1.99712	4		-9	79.6782	7.50302	8		-9	33.9805	11.5825	6		-9	83.4423	7.70931	5
-10	18.475	6.32775	7		-10	35.6514	8.27218	7		-10	4.50061	2.94956	6		-10	30.0903	3.54818	4		-10	48.9717	5.54823	8		-10	14.0177	6.96323	6		-10	15.8887	6.06266	5
-12	1.98895	1.9637	7		-12	4.13031	1.71082	7		-12	2.82495	2.13346	6		-12	0.856724	2.67184	4		-12	-4.2183	2.86111	8		-12	-0.898345	3.8652	6		-12	-3.96866	7.14308	5
-13	0.149393	3.23583	4		-13	-1.47985	1.60293	4		-13	1.62446	2.42759	3		-13	1.44617	0	1		-13	7.06245	2.43072	3		-13	-1.57938	1.19488	3
Best-fit values					Best-fit values					Best-fit values					Best-fit values					Best-fit values					Best-fit values					Best-fit values
LogEC50		-9.277			LogEC50		-9.705			LogEC50		-8.799			LogEC50		-9.648			LogEC50		-9.924			LogEC50		-8.819			LogEC50		-9.473
HillSlope		0.8969			HillSlope		0.8912			HillSlope		0.9622			HillSlope		1.05			HillSlope		0.7338			HillSlope		0.8907			HillSlope		1.279
EC50		5.282e-10			EC50		1.971e-10			EC50		1.588e-09			EC50		2.25e-10			EC50		1.192e-10			EC50		1.518e-09			EC50		3.363e-10
95% CI (profile likelihood)					95% CI (profile likelihood)					95% CI (profile likelihood)					95% CI (profile likelihood)					95% CI (profile likelihood)					95% CI (profile likelihood)					95% CI (profile likelihood)
LogEC50		-9.394 to -9.166			LogEC50		-9.846 to -9.572			LogEC50		-8.908 to -8.693			LogEC50		-9.725 to -9.569			LogEC50		-10.09 to -9.769			LogEC50		-9.007 to -8.652			LogEC50		-9.665 to -9.287
HillSlope		0.7427 to 1.097			HillSlope		0.7004 to 1.138			HillSlope		0.7701 to 1.237			HillSlope		0.8995 to 1.228			HillSlope		0.5846 to 0.9524			HillSlope		0.6209 to 1.434			HillSlope		0.8304 to 2.021
EC50		4.038e-010 to 6.829e-010			EC50		1.427e-010 to 2.680e-010			EC50		1.237e-009 to 2.028e-009			EC50		1.882e-010 to 2.695e-010			EC50		8.066e-011 to 1.702e-010			EC50		9.834e-010 to 2.227e-009			EC50		2.163e-010 to 5.159e-010
Goodness of Fit					Goodness of Fit					Goodness of Fit					Goodness of Fit					Goodness of Fit					Goodness of Fit					Goodness of Fit
Degrees of Freedom		48			Degrees of Freedom		48			Degrees of Freedom		40			Degrees of Freedom		22			Degrees of Freedom		54			Degrees of Freedom		41			Degrees of Freedom		31
R squared		0.9549			R squared		0.9408			R squared		0.9532			R squared		0.9877			R squared		0.9257			R squared		0.8873			R squared		0.8962
Sum of Squares		3911			Sum of Squares		4907			Sum of Squares		3367			Sum of Squares		474.8			Sum of Squares		6450			Sum of Squares		8536			Sum of Squares		5834
Sy.x		9.027			Sy.x		10.11			Sy.x		9.174			Sy.x		4.646			Sy.x		10.93			Sy.x		14.43			Sy.x		13.72
log(agonist) vs. normalized response					log(agonist) vs. normalized response					log(agonist) vs. normalized response					log(agonist) vs. normalized response					log(agonist) vs. normalized response					log(agonist) vs. normalized response					log(agonist) vs. normalized response
Best-fit values					Best-fit values					Best-fit values					Best-fit values					Best-fit values					Best-fit values					Best-fit values
LogEC50		-9.261			LogEC50		-9.699			LogEC50		-8.798			LogEC50		-9.648			LogEC50		-9.908			LogEC50		-8.807			LogEC50		-9.474
EC50		5.486e-10			EC50		2.002e-10			EC50		1.59e-09			EC50		2.248e-10			EC50		1.235e-10			EC50		1.561e-09			EC50		3.36e-10
95% CI (profile likelihood)					95% CI (profile likelihood)					95% CI (profile likelihood)					95% CI (profile likelihood)					95% CI (profile likelihood)					95% CI (profile likelihood)					95% CI (profile likelihood)
LogEC50		-9.371 to -9.154			LogEC50		-9.828 to -9.568			LogEC50		-8.903 to -8.695			LogEC50		-9.725 to -9.571			LogEC50		-10.05 to -9.768			LogEC50		-8.966 to -8.651			LogEC50		-9.664 to -9.287
EC50		4.251e-010 to 7.009e-010			EC50		1.486e-010 to 2.704e-010			EC50		1.251e-009 to 2.018e-009			EC50		1.882e-010 to 2.687e-010			EC50		8.957e-011 to 1.707e-010			EC50		1.080e-009 to 2.233e-009			EC50		2.170e-010 to 5.159e-010
Goodness of Fit					Goodness of Fit					Goodness of Fit					Goodness of Fit					Goodness of Fit					Goodness of Fit					Goodness of Fit
Degrees of Freedom		49			Degrees of Freedom		49			Degrees of Freedom		41			Degrees of Freedom		23			Degrees of Freedom		55			Degrees of Freedom		42			Degrees of Freedom		32
R squared		0.9538			R squared		0.9397			R squared		0.9531			R squared		0.9875			R squared		0.9182			R squared		0.8865			R squared		0.8916
Sum of Squares		4012			Sum of Squares		5001			Sum of Squares		3376			Sum of Squares		484			Sum of Squares		7102			Sum of Squares		8601			Sum of Squares		6089
Sy.x		9.048			Sy.x		10.1			Sy.x		9.074			Sy.x		4.587			Sy.x		11.36			Sy.x		14.31			Sy.x		13.79
Number of points					Number of points					Number of points					Number of points					Number of points					Number of points					Number of points
# of X values		50			# of X values		50			# of X values		42			# of X values		24			# of X values		56			# of X values		43			# of X values		33
# Y values analyzed		50			# Y values analyzed		50			# Y values analyzed		42			# Y values analyzed		24			# Y values analyzed		56			# Y values analyzed		43			# Y values analyzed		33

## Sheet: Ext Data Fig 10c
Gi1					Gi2					Gi3					GoA					GoB					Gz					G15
Arec (log M)	Mean	SEM	N		Arec (log M)	Mean	SEM	N		Arec (log M)	Mean	SEM	N		Arec (log M)	Mean	SEM	N		Arec (log M)	Mean	SEM	N		Arec (log M)	Mean	SEM	N		Arec (log M)	Mean	SEM	N
-3	96.4848	1.3009	4		-3	102.218	1.65818	4		-3	102.345	4.26668	4		-3	100.374	1.11725	3		-3	101.371	0.689608	3		-3	100.559	1.32035	4		-3	104.283	4.2056	3
-4	99.2185	1.60726	3		-4	100.918	0.740108	3		-4	94.699	2.21961	3		-4	100.765	1.65719	2		-4	97.8796	0.890962	2		-4	99.6644	0.588463	3		-4	93.5936	7.679	3
-4.5	105.023	3.32475	3		-4.5	100.75	8.57572	3		-4.5	96.6341	4.56691	3		-4.5	99.5155	0.187455	2		-4.5	100.309	4.83515	2		-4.5	93.2696	3.14666	3		-4.5	82.8086	5.50555	3
-5	85.2101	1.67788	4		-5	95.3066	2.96273	4		-5	80.0763	3.18986	4		-5	98.4666	1.25423	3		-5	98.9384	1.63596	3		-5	86.6008	2.74169	4		-5	86.7049	5.07831	4
-5.5	80.8329	8.10874	3		-5.5	80.2306	0.719671	3		-5.5	63.5562	6.28365	3		-5.5	87.2411	0.612499	2		-5.5	93.0528	0.292598	2		-5.5	70.2854	6.76243	3		-5.5	46.2416	20.1831	3
-6	51.8092	10.6884	4		-6	57.8581	2.99351	4		-6	32.1906	8.78955	4		-6	75.8285	2.77826	3		-6	77.0066	3.18087	3		-6	40.9662	7.65502	4		-6	39.3054	9.14688	4
-6.5	24.3389	4.19652	3		-6.5	38.0176	1.49014	3		-6.5	16.0553	8.69463	3		-6.5	53.3422	10.102	2		-6.5	55.7119	13.9486	2		-6.5	20.837	6.37013	3		-6.5	7.99209	5.77043	3
-7	12.834	7.218	4		-7	14.5132	5.92264	4		-7	1.3222	4.20302	4		-7	26.3227	4.60409	3		-7	32.4571	11.5858	3		-7	5.55226	3.39685	4		-7	4.437	5.99653	4
-10	-2.06356	3.54958	4		-10	0.0258029	3.66292	4		-10	-0.862072	2.68511	4		-10	0.0357081	5.30318	3		-10	8.40058	8.86767	3		-10	1.53925	2.4054	4		-10	-7.5066	5.90901	3
-14	5.56538	2.95108	4		-14	-7.72564	3.72859	4		-14	6.31294	6.42743	4		-14	-1.75562	3.97536	3		-14	-6.10724	7.60306	3		-14	-1.17718	1.29255	4		-14	11.6916	5.22617	4
													36
Best-fit values					Best-fit values					Best-fit values					Best-fit values					Best-fit values					Best-fit values					Best-fit values
LogEC50		-6.041			LogEC50		-6.198			LogEC50		-5.693			LogEC50		-6.535			LogEC50		-6.627			LogEC50		-5.854			LogEC50		-5.626
HillSlope		0.9667			HillSlope		0.9284			HillSlope		0.9906			HillSlope		0.9328			HillSlope		0.8953			HillSlope		0.9705			HillSlope		0.8898
EC50		9.089e-07			EC50		6.346e-07			EC50		2.029e-06			EC50		2.914e-07			EC50		2.362e-07			EC50		1.4e-06			EC50		2.368e-06
95% CI (profile likelihood)					95% CI (profile likelihood)					95% CI (profile likelihood)					95% CI (profile likelihood)					95% CI (profile likelihood)					95% CI (profile likelihood)					95% CI (profile likelihood)
LogEC50		-6.171 to -5.914			LogEC50		-6.295 to -6.101			LogEC50		-5.815 to -5.569			LogEC50		-6.626 to -6.448			LogEC50		-6.821 to -6.458			LogEC50		-5.942 to -5.765			LogEC50		-5.829 to -5.420
HillSlope		0.7475 to 1.291			HillSlope		0.7751 to 1.121			HillSlope		0.7821 to 1.286			HillSlope		0.7760 to 1.124			HillSlope		0.6201 to 1.280			HillSlope		0.8144 to 1.172			HillSlope		0.6223 to 1.322
EC50		6.747e-007 to 1.220e-006			EC50		5.064e-007 to 7.922e-007			EC50		1.530e-006 to 2.698e-006			EC50		2.368e-007 to 3.563e-007			EC50		1.508e-007 to 3.487e-007			EC50		1.142e-006 to 1.719e-006			EC50		1.483e-006 to 3.801e-006
Goodness of Fit					Goodness of Fit					Goodness of Fit					Goodness of Fit					Goodness of Fit					Goodness of Fit					Goodness of Fit
Degrees of Freedom		34			Degrees of Freedom		34			Degrees of Freedom		34			Degrees of Freedom		24			Degrees of Freedom		24			Degrees of Freedom		34			Degrees of Freedom		32
R squared		0.9432			R squared		0.9721			R squared		0.9476			R squared		0.9839			R squared		0.9432			R squared		0.9728			R squared		0.8702
Sum of Squares		3491			Sum of Squares		1858			Sum of Squares		3275			Sum of Squares		713.9			Sum of Squares		2510			Sum of Squares		1687			Sum of Squares		7525
Sy.x		10.13			Sy.x		7.392			Sy.x		9.815			Sy.x		5.454			Sy.x		10.23			Sy.x		7.044			Sy.x		15.34
log(agonist) vs. normalized response					log(agonist) vs. normalized response					log(agonist) vs. normalized response					log(agonist) vs. normalized response					log(agonist) vs. normalized response					log(agonist) vs. normalized response					log(agonist) vs. normalized response
Best-fit values					Best-fit values					Best-fit values					Best-fit values					Best-fit values					Best-fit values					Best-fit values
LogEC50		-6.041			LogEC50		-6.194			LogEC50		-5.693			LogEC50		-6.532			LogEC50		-6.616			LogEC50		-5.854			LogEC50		-5.628
EC50		9.104e-07			EC50		6.394e-07			EC50		2.028e-06			EC50		2.941e-07			EC50		2.419e-07			EC50		1.4e-06			EC50		2.355e-06
95% CI (profile likelihood)					95% CI (profile likelihood)					95% CI (profile likelihood)					95% CI (profile likelihood)					95% CI (profile likelihood)					95% CI (profile likelihood)					95% CI (profile likelihood)
LogEC50		-6.166 to -5.916			LogEC50		-6.289 to -6.100			LogEC50		-5.813 to -5.572			LogEC50		-6.616 to -6.447			LogEC50		-6.779 to -6.457			LogEC50		-5.941 to -5.767			LogEC50		-5.824 to -5.432
EC50		6.828e-007 to 1.213e-006			EC50		5.146e-007 to 7.935e-007			EC50		1.537e-006 to 2.679e-006			EC50		2.419e-007 to 3.569e-007			EC50		1.662e-007 to 3.494e-007			EC50		1.147e-006 to 1.709e-006			EC50		1.501e-006 to 3.700e-006
Goodness of Fit					Goodness of Fit					Goodness of Fit					Goodness of Fit					Goodness of Fit					Goodness of Fit					Goodness of Fit
Degrees of Freedom		35			Degrees of Freedom		35			Degrees of Freedom		35			Degrees of Freedom		25			Degrees of Freedom		25			Degrees of Freedom		35			Degrees of Freedom		33
R squared		0.9431			R squared		0.9716			R squared		0.9475			R squared		0.9835			R squared		0.9423			R squared		0.9727			R squared		0.8686
Sum of Squares		3498			Sum of Squares		1894			Sum of Squares		3276			Sum of Squares		731.8			Sum of Squares		2553			Sum of Squares		1693			Sum of Squares		7618
Sy.x		9.997			Sy.x		7.356			Sy.x		9.675			Sy.x		5.41			Sy.x		10.11			Sy.x		6.954			Sy.x		15.19
Number of points					Number of points					Number of points					Number of points					Number of points					Number of points					Number of points
# of X values		36			# of X values		36			# of X values		36			# of X values		26			# of X values		26			# of X values		36			# of X values		34
# Y values analyzed		36			# Y values analyzed		36			# Y values analyzed		36			# Y values analyzed		26			# Y values analyzed		26			# Y values analyzed		36			# Y values analyzed		34

## Sheet: Ext Data Fig 10d
Gi1					Gi2					Gi3					GoA					GoB					Gz					G15
Pilo (log M)	Mean	SEM	N		Pilo (log M)	Mean	SEM	N		Pilo (log M)	Mean	SEM	N		Pilo (log M)	Mean	SEM	N		Pilo (log M)	Mean	SEM	N		Pilo (log M)	Mean	SEM	N		Pilo (log M)	Mean	SEM	N
-3	98.2079	5.19962	6		-3	101.577	1.68954	6		-3	104.469	12.6022	4		-3	98.1895	2.00779	5		-3	97.7337	2.66751	4		-3	93.919	5.13458	5		-3	99.3834	5.37432	5
-4	90.4138	6.48295	6		-4	95.1515	2.48311	5		-4	89.2752	13.7757	4		-4	98.8506	1.24909	5		-4	100.112	1.34837	4		-4	75.0295	12.5709	5		-4	83.9148	8.15803	5
-4.5	75.7451	12.1899	4		-4.5	89.7015	6.44311	5		-4.5	90.508	1.82433	3		-4.5	90.0233	4.72679	3		-4.5	93.2873	1.80258	3		-4.5	69.7992	17.2999	4		-4.5	92.9374	16.6052	4
-5	63.6366	8.19714	6		-5	77.9292	3.7906	6		-5	63.0654	9.02746	4		-5	73.68	3.95444	5		-5	86.1003	4.54624	4		-5	64.1403	15.6884	5		-5	53.1748	14.7128	5
-5.5	33.9892	10.4381	6		-5.5	60.3107	7.19075	6		-5.5	60.0075	10.2266	4		-5.5	54.4098	4.59453	5		-5.5	65.7845	6.0624	4		-5.5	20.9272	12.5774	5		-5.5	38.2338	14.3111	5
-6	9.22519	6.64834	6		-6	25.9794	3.57991	6		-6	-4.63033	5.97125	3		-6	18.8316	5.23555	5		-6	40.8559	9.13894	4		-6	9.18447	5.22571	5		-6	25.1172	11.8763	5
-7	-7.92845	6.14384	5		-7	1.16299	2.61536	5		-7	1.56406	1.89955	3		-7	-0.426637	5.90811	4		-7	6.58345	2.26182	4		-7	2.55754	10.2649	5		-7	8.38995	7.32977	5
-8	-2.88143	4.12188	6		-8	-5.24493	4.67782	6		-8	6.58705	2.94332	4		-8	-4.39621	3.66059	5		-8	3.19051	5.12502	4		-8	-0.0196508	13.7007	5		-8	-20.0245	11.6877	4
-10	4.30466	2.79805	6		-10	-0.483651	3.90288	6		-10	-0.529854	6.18165	3		-10	1.3332	3.5911	5		-10	1.74481	5.50117	4							-10	4.97723	5.61059	5
					-14	3.46408	5.0773	6		-14	1.26712	4.24156	3		-14	7.68224	3.85162	5		-14	-3.65371	10.1006	4
Best-fit values					Best-fit values					Best-fit values					Best-fit values					Best-fit values					Best-fit values					Best-fit values
LogEC50		-5.17			LogEC50		-5.599			LogEC50		-5.376			LogEC50		-5.489			LogEC50		-5.819			LogEC50		-4.986			LogEC50		-5.25
HillSlope		0.985			HillSlope		1.008			HillSlope		1.085			HillSlope		1.08			HillSlope		0.9366			HillSlope		0.7631			HillSlope		0.7583
EC50		6.758e-06			EC50		2.515e-06			EC50		4.209e-06			EC50		3.24e-06			EC50		1.517e-06			EC50		1.033e-05			EC50		5.617e-06
95% CI (profile likelihood)					95% CI (profile likelihood)					95% CI (profile likelihood)					95% CI (profile likelihood)					95% CI (profile likelihood)					95% CI (profile likelihood)					95% CI (profile likelihood)
LogEC50		-5.329 to -5.002			LogEC50		-5.702 to -5.499			LogEC50		-5.585 to -5.155			LogEC50		-5.579 to -5.399			LogEC50		-5.966 to -5.685			LogEC50		-5.297 to -4.632			LogEC50		-5.559 to -4.954
HillSlope		0.7110 to 1.426			HillSlope		0.8015 to 1.295			HillSlope		0.6610 to 1.932			HillSlope		0.8739 to 1.350			HillSlope		0.7097 to 1.283			HillSlope		0.4388 to 1.556			HillSlope		0.4725 to 1.322
EC50		4.688e-006 to 9.953e-006			EC50		1.985e-006 to 3.172e-006			EC50		2.603e-006 to 7.002e-006			EC50		2.635e-006 to 3.988e-006			EC50		1.081e-006 to 2.064e-006			EC50		5.051e-006 to 2.332e-005			EC50		2.759e-006 to 1.112e-005
Goodness of Fit					Goodness of Fit					Goodness of Fit					Goodness of Fit					Goodness of Fit					Goodness of Fit					Goodness of Fit
Degrees of Freedom		49			Degrees of Freedom		55			Degrees of Freedom		33			Degrees of Freedom		45			Degrees of Freedom		37			Degrees of Freedom		37			Degrees of Freedom		41
R squared		0.8586			R squared		0.9426			R squared		0.8447			R squared		0.9577			R squared		0.9457			R squared		0.6613			R squared		0.7294
Sum of Squares		13019			Sum of Squares		6008			Sum of Squares		10624			Sum of Squares		3480			Sum of Squares		3913			Sum of Squares		23857			Sum of Squares		23100
Sy.x		16.3			Sy.x		10.45			Sy.x		17.94			Sy.x		8.794			Sy.x		10.28			Sy.x		25.39			Sy.x		23.74
log(agonist) vs. normalized response					log(agonist) vs. normalized response					log(agonist) vs. normalized response					log(agonist) vs. normalized response					log(agonist) vs. normalized response					log(agonist) vs. normalized response					log(agonist) vs. normalized response
Best-fit values					Best-fit values					Best-fit values					Best-fit values					Best-fit values					Best-fit values					Best-fit values
LogEC50		-5.172			LogEC50		-5.6			LogEC50		-5.37			LogEC50		-5.489			LogEC50		-5.811			LogEC50		-5.025			LogEC50		-5.238
EC50		6.737e-06			EC50		2.514e-06			EC50		4.261e-06			EC50		3.244e-06			EC50		1.545e-06			EC50		9.43e-06			EC50		5.778e-06
95% CI (profile likelihood)					95% CI (profile likelihood)					95% CI (profile likelihood)					95% CI (profile likelihood)					95% CI (profile likelihood)					95% CI (profile likelihood)					95% CI (profile likelihood)
LogEC50		-5.328 to -5.013			LogEC50		-5.701 to -5.500			LogEC50		-5.583 to -5.157			LogEC50		-5.581 to -5.397			LogEC50		-5.942 to -5.684			LogEC50		-5.302 to -4.734			LogEC50		-5.509 to -4.971
EC50		4.704e-006 to 9.711e-006			EC50		1.993e-006 to 3.166e-006			EC50		2.610e-006 to 6.970e-006			EC50		2.625e-006 to 4.008e-006			EC50		1.142e-006 to 2.069e-006			EC50		4.991e-006 to 1.844e-005			EC50		3.100e-006 to 1.068e-005
Goodness of Fit					Goodness of Fit					Goodness of Fit					Goodness of Fit					Goodness of Fit					Goodness of Fit					Goodness of Fit
Degrees of Freedom		50			Degrees of Freedom		56			Degrees of Freedom		34			Degrees of Freedom		46			Degrees of Freedom		38			Degrees of Freedom		38			Degrees of Freedom		42
R squared		0.8586			R squared		0.9426			R squared		0.8442			R squared		0.9572			R squared		0.9454			R squared		0.6542			R squared		0.7221
Sum of Squares		13021			Sum of Squares		6009			Sum of Squares		10658			Sum of Squares		3520			Sum of Squares		3934			Sum of Squares		24355			Sum of Squares		23731
Sy.x		16.14			Sy.x		10.36			Sy.x		17.71			Sy.x		8.748			Sy.x		10.18			Sy.x		25.32			Sy.x		23.77
Number of points					Number of points					Number of points					Number of points					Number of points					Number of points					Number of points
# of X values		51			# of X values		57			# of X values		35			# of X values		47			# of X values		39			# of X values		39			# of X values		43
# Y values analyzed		51			# Y values analyzed		57			# Y values analyzed		35			# Y values analyzed		47			# Y values analyzed		39			# Y values analyzed		39			# Y values analyzed		43
